# Supplementary material for: SuperSAGE: the drought stress-responsive transcriptome of chickpea roots
Source: BMC Genomics. 2008 Nov 24;9:553. doi: 10.1186/1471-2164-9-553 (PMC2628679; doi:10.1186/1471-2164-9-553)
Supplement: Additional file 1 — Main data matrix [file 1471-2164-9-553-S1.xls]

## Sheet: big list
				Annotation, expression Ratios (ln), and normalized counds (counts million-1) for chickpea roots control and 6H desiccation SuperSAGE libraries
				Note: The initial 3,858 hits annotated to well characterized Uniprot entries reported in the present work are continuously complemented by annotation of the SuperTAGs to the NR (non redundant) NCBI nucleotide database (plant entries), as well as by newly characterized TIGR annotations. In order to enter the annotation data into programs for further analyses (i.e. GO: Categories representation ana…
						Nucleotide SuperTAG annotation linked to Uniprot DB							Normalized counts (counts million-1)
Tag ID	large code			SuperTAG ID	Sequence (5' - 3')	Uniprot ID	Uniprot acc	E-value	Uniprot entry name	GO terms	Expresson Ratio (ln)	P value	Control roots library	6 hours desicccation Library	Expression Ratio (ln) microarray
34	Ca	SS	39	STCa-4092	CATGATAAAGTTTGTTTCTTATATCT						4.177	0	34.6	2260	0.294906
7588	Ca	SS	40	STCa-20066	CATGTCTATTTTATGAATTTTAGATG						3.844	1.02e-08	0	808
36	Ca	SS	41	STCa-23915	CATGTTTCAGCTTATGAAGAACAAGT						3.772	3.76e-08	0	752
37	Ca	SS	43	STCa-19021	CATGTATGATTGCTTTTATATTTATT	O65760_CICAR	O65760	4e-07	Extensin	GO:0005199,GO:0009664	3.694	1.38e-07	0	696	0.646056
38	Ca	SS	45	STCa-7166	CATGCACTTTCAAAAGAAATAAGAAA	Q6R6M7_PEA	Q6R6M7	4e-07	NADP-dependent isocitrate dehydrogenase I	GO:0004450,GO:0016491,GO:0016652,GO:0008152	3.579	7.84e-07	0	620
39	Ca	SS	46	STCa-7800	CATGCATATTCTAAAGAAATTTGTGC	Q70I30_LOTJA	Q70I30	0.002	S-receptor kinase-like protein 1 (RLK)-S	GO:0004672,GO:0005524,GO:0000166,GO:0005529,GO:0004872,GO:0004674,GO:0016301,GO:0016740,GO:0006468	3.579	7.84e-07	0	620
40	Ca	SS	48	STCa-10145	CATGCTGTTTCTCCTGATTTAAAGCG	Q9SXS9_CICAR	Q9SXS9	4e-07	Chalcone isomerase	GO:16853	3.517	1.87e-06	0	583
42	Ca	SS	49	STCa-6574	CATGCAAGTTGTACAAATTAATAATA	Q9LUL9_ARATH	Q9LUL9	1e-06	Arabidopsis thaliana genomic DNA, chromosome 3, P1 clone: MLN21 (At3g14280)	GO:	3.467	2.19e-10	34.6	1110	0.709021
43	Ca	SS	50	STCa-17434	CATGTAATAATAAAAAATAAACAAAT	Q9FYR1_ARATH	Q9FYR1	0.001	Gb|AAD20160.1	GO:	3.45	4.45e-06	0	545
44	Ca	SS	53	STCa-181	CATGAAAATAGATAAATATTTGTGTG						3.415	6.86e-06	0	526	0.86794
45	Ca	SS	54	STCa-3818	CATGAGTAGTGTGAACTTTTTCTCTT						3.415	6.86e-06	0	526	0.324978
47	Ca	SS	56	STCa-6190	CATGCAAACTCTGTTACTGATATAAT	ATP4_PEA	Q41000	2e-05	ATP synthase delta' chain, mitochondrial precursor (EC 3.6.3.14)	GO:0015078,GO:0046933,GO:0046961,GO:0016787,GO:0046872,GO:0006754,GO:0006810,GO:0015986,GO:0015992,GO:0006811,GO:0005739,GO:0016469,GO:0045261	3.341	1.63e-05	0	489
49	Ca	SS	58	STCa-8459	CATGCCATTTTATGTAACAACGTTAT	Q8W557_9FABA	Q8W557	2e-05	UDP-glucose pyrophosphorylase	GO:0016779,GO:0008152	3.341	1.63e-05	0	489	0.84415
50	Ca	SS	60	STCa-9961	CATGCTGCAGAACTACTATTCTTTCC						3.341	1.63e-05	0	489	0.532391
11421	Ca	SS	61	STCa-18846	CATGTATATTTGCTTTATGGGATCCT						3.341	1.63e-05	0	489	0.717352
52	Ca	SS	62	STCa-21968	CATGTGTTATCTTTTTTAATTTATGT						3.322	6.14e-09	34.6	959
53	Ca	SS	63	STCa-4590	CATGATCAGTAGATCACTAAATAAAT						3.302	2.52e-05	0	470	0.563608
39865	Ca	SS	64	STCa-6550	CATGCAAGTGCATCAAAAGGAAGGGG						3.302	2.52e-05	0	470	0.340749
55	Ca	SS	67	STCa-7762	CATGCATAGTCTTGTGTGTTATTTTG	A2Q3E3_MEDTR	A2Q3E3	9e-06	Polygalacturonase , putative	GO:	3.302	2.52e-05	0	470	0.518198
56	Ca	SS	68	STCa-21621	CATGTGTATTTCTTTATGCTATATAG						3.302	2.52e-05	0	470	0.779325
57	Ca	SS	69	STCa-105	CATGAAAACATTGATGCTATGTGTAT						3.261	3.89e-05	0	451
6389	Ca	SS	70	STCa-228	CATGAAAATGGTATGGATGAATTTAA	Q9FSY8_CICAR	Q9FSY8	4e-07	Beta-glucosidase (B-glucosidase)	GO:0003824,GO:0004553,GO:0043169,GO:0005975	3.261	3.89e-05	0	451
1616	Ca	SS	71	STCa-5391	CATGATGTATCAGCTCGTAGTAAGAG						3.261	2.13e-08	34.6	902	-1.46968
61	Ca	SS	73	STCa-16605	CATGGTTGAAGCAAAATAAATTGTTA						3.261	3.89e-05	0	451	0.339325
62	Ca	SS	74	STCa-19256	CATGTATTGAATAAAAGTTATGATGA						3.218	6.01e-05	0	432	1.00577
34313	Ca	SS	75	STCa-20422	CATGTGAATGAAGAGTTCGAGCAGAA	Q39449_CICAR	Q39449	0.002	Specific tissue protein 1	GO:	3.218	6.01e-05	0	432
64	Ca	SS	78	STCa-387	CATGAAAGAAAATCAATTATGTGGGC						3.174	1.79856e-14	69.2	1650
65	Ca	SS	80	STCa-18178	CATGTAGAAGTTTTAATTCATCTATG						3.174	9.27e-05	0	414
66	Ca	SS	81	STCa-21666	CATGTGTCATTGACTTTAAATATATT						3.174	9.27e-05	0	414	0.222343
14758	Ca	SS	82	STCa-24344	CATGTTTTGATGAAGTTTTAAGGATT						3.174	9.27e-05	0	414
41348	Ca	SS	84	STCa-12193	CATGGATATTGAATTCGAGCAGAAAA						3.127	0.000143	0	395
69	Ca	SS	86	STCa-14806	CATGGGGGGCAGAATGGGGAGAACAA	CYSEP_VIGMU	CYSEP	0.0006	Vignain precursor (EC 3.4.22.-) (Bean endopeptidase) (Cysteine proteinase) (Sulfhydryl-endopeptidase) (SH-EP) [Contains: Vignain-1; Vignain-2]	GO:0008233,GO:0004197,GO:0016787,GO:0008234,GO:0006508,GO:0005783	3.127	0.000143	0	395	-0.495937
70	Ca	SS	87	STCa-23486	CATGTTGGTGCAATGAAAGTTTTTTT	Q9AT56_ELAUM	Q9AT56	0.009	S-adenosyl-L-methionine synthetase (EC 2.5.1.6)	GO:0000287,GO:0005524,GO:0000166,GO:0004478,GO:0030955,GO:0016740,GO:0046872,GO:0006730	3.127	0	104	2370	-1.93794
71	Ca	SS	89	STCa-5638	CATGATTATTATTATTGTTGTAATGG						3.103	3.85e-07	34.6	771
72	Ca	SS	90	STCa-2982	CATGACTTTCGAGCCCTGAATTATTG	O65747_CICAR	O65747	4e-07	Cysteine synthase, O-acetyl-L-serine (Thiol)-lyase	GO:0003824,GO:0004124,GO:0016829,GO:0008152,GO:0006535	3.079	0.000221	0	376	0.53004
73	Ca	SS	91	STCa-22062	CATGTGTTTACCATTTTCTAATATTG						3.079	5.81e-07	34.6	752
23337	Ca	SS	92	STCa-23884	CATGTTTATTTGTTAACGTTCCTTTT						3.079	0.000221	0	376
75	Ca	SS	93	STCa-10367	CATGCTTGGTTAGATATGTTGTTTTT						3.027	0.000341	0	357	0.84844
6735	Ca	SS	94	STCa-170	CATGAAAATAAGACATCATAAGAACT						3.001	1.99e-06	34.6	696	-0.650088
12628	Ca	SS	95	STCa-3839	CATGAGTATGTTTGAAAATAAATTGT						2.973	0.000526	0	338	0.699129
17340	Ca	SS	96	STCa-5928	CATGATTTATTATACCTTGCCAAGAT						2.916	0.000812	0	320
13602	Ca	SS	98	STCa-21946	CATGTGTTAATAAAATTTATGTATAT	Q944A7_ARATH	Q944A7	0.004	AT4g35230/F23E12_210	GO:0004672,GO:0005488,GO:0005524,GO:0004674,GO:0016301,GO:0016740,GO:0006468	2.916	0.000812	0	320
80	Ca	SS	99	STCa-22698	CATGTTATTTTTGCTGTTTGTTATCA	Q8L5Q4_CICAR	Q8L5Q4	4e-07	Putative adenosine kinase	GO:0016301,GO:0016740,GO:0004001,GO:0006166	2.916	0.000812	0	320	0.817575
426	Ca	SS	101	STCa-175	CATGAAAATAATTGTCTATTTAGGTG						2.856	0.00125	0	301
82	Ca	SS	102	STCa-219	CATGAAAATGAGGTGGTGCTGAAGGA						2.856	0.00125	0	301	-0.95972
83	Ca	SS	103	STCa-5308	CATGATGGTATTAGTGAATAAAAAGA						2.856	0.00125	0	301
32560	Ca	SS	104	STCa-10095	CATGCTGTCTCACAAATGAGATTGAC						2.856	0.00125	0	301	0.395415
85	Ca	SS	105	STCa-12406	CATGGATGGTTGATAGAGAAAATAAT	COB22_ARATH	Q9C827	2e-05	Coatomer subunit beta'-2 (Beta'-coat protein 2) (Beta'-COP 2)	GO:0008565,GO:0006886	2.856	0.00125	0	301
22293	Ca	SS	106	STCa-12550	CATGGATTTCTTTGCTTACCATTATT						2.856	0.00125	0	301	-0.328504
87	Ca	SS	109	STCa-23006	CATGTTCTGGGAATCAAAAAAAAAAA						2.856	0.00125	0	301
88	Ca	SS	110	STCa-9350	CATGCGTGTTATTCTGAATTGACTTT						2.791	0.00193	0	282	1.6263
33489	Ca	SS	113	STCa-10311	CATGCTTCTTCAGTCAAATGTTGGTT						2.791	0.00193	0	282	0.612479
25884	Ca	SS	114	STCa-12194	CATGGATATTGAATTCGAGCAGAAAC						2.791	0.00193	0	282	0.671413
92	Ca	SS	115	STCa-16058	CATGGTGCGATTGAGTCTAAAAGGAG						2.791	0.00193	0	282
93	Ca	SS	116	STCa-17627	CATGTAATTGTAAAATATTCATTTCT	Q700A7_CICAR	Q700A7	4e-07	Putative universal stress protein	GO:6950	2.791	0.00193	0	282
7762	Ca	SS	117	STCa-19365	CATGTATTTTGAGTCTAGAATGAATG						2.791	0.00193	0	282	0.524137
11864	Ca	SS	121	STCa-15235	CATGGGTTATTTTTGCAGTACTTTTT						2.757	5.14e-05	34.6	545
96	Ca	SS	122	STCa-21605	CATGTGTATTATTCATTAATTAATTA						2.74	5.5e-09	69.2	1070	0.840705
97	Ca	SS	123	STCa-542	CATGAAATAATTTGTTTTGTTTTGTT	Q9FKX6_ARATH	Q9FKX6	0.004	Prolyl 4-hydroxylase, alpha subunit-like protein	GO:0016706,GO:0019538	2.722	0.00298	0	263
98	Ca	SS	124	STCa-1589	CATGAAGTGTGCTCATTTGATTCTAT	O65736_CICAR	O65736	4e-07	Beta-galactosidase	GO:0003824,GO:0016787,GO:0043169,GO:0016798,GO:0004565,GO:0008152,GO:0005975,GO:0009341	2.722	0.00298	0	263	1.75527
99	Ca	SS	125	STCa-6064	CATGCAAAAAAAAAAAAAAAAAAAAA						2.722	0.00298	0	263
100	Ca	SS	127	STCa-6595	CATGCAATAAGTTTCTCTATACAGTT						2.722	0.00298	0	263
13710	Ca	SS	128	STCa-8270	CATGCCAATGCTTGCATTTTTTTACA						2.722	0.00298	0	263	0.297137
102	Ca	SS	131	STCa-9009	CATGCGACTTGGACTTTTAAAAGGTT						2.722	0.00298	0	263	0.588897
37196	Ca	SS	132	STCa-10999	CATGGAATAAAAGTTTTATGTAATGG	Q9M0H8_ARATH	Q9M0H8	4e-07	Predicted proline-rich protein	GO:	2.722	0.00298	0	263	0.518794
17800	Ca	SS	133	STCa-11700	CATGGAGACCTTGAATGAAAATTAAT						2.722	0.00298	0	263	0.790728
23472	Ca	SS	135	STCa-17408	CATGTAAGTTTTGATTGATGGAGAAG						2.722	7.69e-05	34.6	526
33507	Ca	SS	136	STCa-22456	CATGTTAGGTTGTGTGTGATGAAGAG						2.722	0.00298	0	263
42128	Ca	SS	137	STCa-22731	CATGTTCAACTTTACTCAAACTTTGA						2.722	0.00298	0	263	0.943127
108	Ca	SS	138	STCa-3316	CATGAGCAAAAAAACCCTGTTGGTCT						2.704	1.23e-08	69.2	1030
109	Ca	SS	139	STCa-17087	CATGTAAATATTCTCCTGTTTTCTTG						2.667	2.73e-08	69.2	996	0.553885
25479	Ca	SS	140	STCa-696	CATGAAATTGCAGAATATTTCAATTT	SAR1A_ARATH	O04834	0.009382	GTP-binding protein SAR1A	GO:0000166,GO:0005525,GO:0015031,GO:0007264,GO:0006810,GO:0006886,GO:0006888,GO:0005622,GO:0005783	2.648	0.0046	0	244	0.514021
111	Ca	SS	144	STCa-2044	CATGAATGTTGTTTATTAATCGAGTT	Q8GT82_GOSBA	Q8GT82	0.001	Fiber protein Fb11	GO:	2.648	0.0046	0	244
112	Ca	SS	145	STCa-2218	CATGACAAAAAAAAAAAAAAAAAAAA						2.648	0.0046	0	244
113	Ca	SS	146	STCa-4616	CATGATCATTATGTATTTTCTTCCTG						2.648	0.0046	0	244
114	Ca	SS	149	STCa-7389	CATGCAGCTTTTATAAAAATGAGTAT						2.648	0.0046	0	244
27162	Ca	SS	150	STCa-8232	CATGCCAAGCTTTTAAATTTTTGGTG						2.648	0.0046	0	244
116	Ca	SS	151	STCa-8720	CATGCCTAAAACTACTTTTATTATTT						2.648	0.0046	0	244
117	Ca	SS	153	STCa-9259	CATGCGTAGGGAATACACATAACAGG						2.648	0.0046	0	244	1.41415
118	Ca	SS	154	STCa-10123	CATGCTGTTATATGCTTTTTTGATTG						2.648	0.0046	0	244	1.10724
119	Ca	SS	155	STCa-10727	CATGGAAATTCATTTCCAAGCTGTTA	Q7XUF4_ORYSA	Q7XUF4	7e-05	Cyclin-dependent kinase G-2	GO:0004672,GO:0005524,GO:0000166,GO:0004674,GO:0016301,GO:0016740,GO:0006468	2.648	0.0046	0	244	-0.336872
120	Ca	SS	156	STCa-15284	CATGGGTTTCAGTTTGTTTGATTAAA	RLA1_MAIZE	P52855	0.000601	60S acidic ribosomal protein P1 (L12)	GO:0003735,GO:0006412,GO:0006414,GO:0005622,GO:0005840,GO:0030529	2.648	0.0046	0	244	0.110647
121	Ca	SS	158	STCa-19228	CATGTATTCAGATGGATCGACTACAT						2.648	0.0046	0	244
122	Ca	SS	159	STCa-22163	CATGTTAAATAAGGGTTCATCTGTAT						2.648	0.0046	0	244
123	Ca	SS	160	STCa-22997	CATGTTCTGCCTTTCAATAAAAATAT						2.648	0.0046	0	244
124	Ca	SS	161	STCa-24351	CATGTTTTGCAAGAAGTAAAAGCTAT						2.648	0.000172	34.6	489	0.594431
125	Ca	SS	162	STCa-74	CATGAAAAATAACTAGAAATATTTGG						2.568	0.0071	0	226	0.307485
126	Ca	SS	163	STCa-227	CATGAAAATGGTATGGATGAATTCGA	Q9FSY8_CICAR	Q9FSY8	3e-05	Beta-glucosidase (B-glucosidase)	GO:0003824,GO:0004553,GO:0043169,GO:0005975	2.568	0.0071	0	226
127	Ca	SS	164	STCa-866	CATGAACATATTATTATGTATATATT	Q84P43_SOYBN	Q84P43	0.0006	Protein kinase Pti1	GO:0004672,GO:0005524,GO:0000166,GO:0004713,GO:0016301,GO:0016740,GO:0006468,GO:0016020,GO:0016021	2.568	0.0071	0	226	0.750944
43600	Ca	SS	166	STCa-1182	CATGAAGAATGGGTAGGAAACAAATT						2.568	0.0071	0	226
27679	Ca	SS	167	STCa-1789	CATGAATCAATTCAATAACTTCTGAA						2.568	0.0071	0	226
130	Ca	SS	168	STCa-4112	CATGATAAATTGAGGAAATGATATAT						2.568	0.0071	0	226
17251	Ca	SS	169	STCa-10545	CATGGAAAAAAAAAAAAAAAACTAGC						2.568	0.0071	0	226
132	Ca	SS	170	STCa-11006	CATGGAATAACCGATTCTTATCTTTT						2.568	0.0071	0	226
15407	Ca	SS	171	STCa-12009	CATGGAGTAGTTACCTTTTGTTTGGG						2.568	0.0071	0	226	0.349952
134	Ca	SS	173	STCa-12649	CATGGCAATACATTGCTTCTTTTTCT						2.568	0.0071	0	226
135	Ca	SS	174	STCa-13716	CATGGGAATCAATATTAAAAATTGTC						2.568	0.0071	0	226
136	Ca	SS	175	STCa-15340	CATGGTAAATGTGTTAAAATTACTCC	Q40359_MEDSA	Q40359	4e-07	Alfin-1	GO:0005515,GO:0008270,GO:0006355	2.568	0.0071	0	226
137	Ca	SS	176	STCa-16114	CATGGTGGAGCTGTTTCATTGGGTCA	Q5XMB8_TOBAC	Q5XMB8	0.001	Cytosolic acetoacetyl-coenzyme A thiolase	GO:	2.568	0.0071	0	226	0.327864
138	Ca	SS	178	STCa-16261	CATGGTGGTTTTTATGATAATTAAAG						2.568	1.99e-07	69.2	902
139	Ca	SS	179	STCa-16514	CATGGTTATGTTTGTTATTTATCAAT	Q9FNN5_ARATH	Q9FNN5	2e-05	NADH dehydrogenase (At5g08530)	GO:0008137,GO:0005506,GO:0010181,GO:0016651,GO:0051287,GO:0006118,GO:0006120,GO:0005739	2.568	0.0071	0	226	0.694646
22820	Ca	SS	180	STCa-21141	CATGTGGCAGTGAGTATTTGAATTCG						2.568	0.0071	0	226	0.296394
141	Ca	SS	181	STCa-23771	CATGTTTACTCAAAATACAATAATAT						2.568	0.0071	0	226	0.780242
142	Ca	SS	182	STCa-24251	CATGTTTTAGATTGAATTTTCATACT						2.568	0.0071	0	226	0.743365
22168	Ca	SS	183	STCa-5543	CATGATTAATCTTGTAATAATTTAAG	Q8L5Q1_CICAR	Q8L5Q1	4e-07	Putative epsilon subunit of mitochondrial F1-ATPase	GO:0046933,GO:0046961,GO:0015986,GO:0005739,GO:0016469	2.525	0.000568	34.6	432
144	Ca	SS	185	STCa-5894	CATGATTTACAAATCCTTAGAAATAG						2.525	0.000568	34.6	432
23917	Ca	SS	186	STCa-15559	CATGGTATATATTGAAGTGTTTTTGC						2.525	0.000568	34.6	432
6698	Ca	SS	187	STCa-19168	CATGTATGTTTGTTTAATTATGTTTT						2.525	0.000568	34.6	432
147	Ca	SS	188	STCa-1650	CATGAATAAAGCTTTTCTCTGGGCAT						2.481	0.011	0	207
148	Ca	SS	189	STCa-4482	CATGATATTATTATCATTGGAATGTT						2.481	0.011	0	207	0.732368
17391	Ca	SS	190	STCa-5912	CATGATTTATAATTATTGTAATGATC	BRU1_SOYBN	P35694	2e-05	Brassinosteroid-regulated protein BRU1 precursor	GO:0004553,GO:0016762,GO:0016787,GO:0016798,GO:0008152,GO:0006073,GO:0005975,GO:0005618,GO:0048046	2.481	0.011	0	207
12115	Ca	SS	191	STCa-6821	CATGCACAATGAAGCTGTTAGAGCAC	PSMD3_DAUCA	Q06364	7e-08	Probable 26S proteasome non-ATPase regulatory subunit 3 (26S proteasome subunit S3) (Nuclear antigen 21D7)	GO:0043234,GO:0005829,GO:0005634	2.481	0.011	0	207
13821	Ca	SS	194	STCa-7246	CATGCAGAGCTTAGTTGCAGTGTTTT						2.481	0.011	0	207	0.372942
155	Ca	SS	198	STCa-8853	CATGCCTGTTCGGTTAAATAAAGGAG	Q42149_ARATH	Q42149	1e-06	Ribosomal protein L10 homolog (Fragment)	GO:	2.481	0.011	0	207	0.174793
163	Ca	SS	201	STCa-10555	CATGGAAAAAATCTTGCAATAACTTG						2.481	0.011	0	207
165	Ca	SS	202	STCa-11965	CATGGAGGGTTTTCCTTTTTGTCTTT	OPT3_ARATH	O23482	0.009382	Probable oligopeptide transporter 3 (AtOPT3)	GO:0015198,GO:0015031,GO:0006810,GO:0006857,GO:0007275,GO:0016020,GO:0016021	2.481	0.011	0	207	-0.372514
166	Ca	SS	203	STCa-12102	CATGGATAAACAATTGAATGACAACC						2.481	0.011	0	207
167	Ca	SS	207	STCa-12463	CATGGATTAATCTAATATGTAATCTT						2.481	0.011	0	207
168	Ca	SS	208	STCa-13886	CATGGGAGCTGTCGATTATCAATGGT						2.481	0.011	0	207	-0.482886
35273	Ca	SS	210	STCa-14062	CATGGGATTGGCAATTATGGTTATAA						2.481	0.011	0	207	0.486123
36058	Ca	SS	211	STCa-15300	CATGGTAAAAAAAAAAAAAAAAAAAA						2.481	0.011	0	207
171	Ca	SS	212	STCa-16630	CATGGTTGATAAAGTGGTAGATTTGG						2.481	0.011	0	207	0.711478
38976	Ca	SS	215	STCa-16875	CATGTAAAAAAAAAAAAAAAAAAACT						2.481	0.011	0	207
173	Ca	SS	217	STCa-17076	CATGTAAATATCGTGTATGCTAAAAG						2.481	0.011	0	207	0.943127
174	Ca	SS	219	STCa-19523	CATGTCACAGAAAATAAACTTCAATT						2.481	0.011	0	207
27842	Ca	SS	220	STCa-23978	CATGTTTCTTACATCAACTTTGTATG						2.481	0.011	0	207
176	Ca	SS	221	STCa-24154	CATGTTTGTATAGCACCAACAAGAAG						2.481	0.011	0	207	0.806922
40991	Ca	SS	222	STCa-6765	CATGCAATTTAGGGTTTTATTGTTTT						2.434	0.00125	34.6	395	1.34156
178	Ca	SS	223	STCa-602	CATGAAATGAAATTTGCACTCTTATC						2.386	0.0169	0	188
179	Ca	SS	225	STCa-857	CATGAACAGTTTCATCAACGATATAT	Q9M3H6_CICAR	Q9M3H6	0.0003	Histone H2B	GO:0003677,GO:0007001,GO:0006334,GO:0000786,GO:0005634	2.386	0.0169	0	188	-0.723606
180	Ca	SS	226	STCa-3159	CATGAGACTGGTTTAAGAATTGGTGG						2.386	0.00185	34.6	376	0.131028
28202	Ca	SS	227	STCa-6069	CATGCAAAAAAAAAAAAAAAAAACTA						2.386	0.0169	0	188
18834	Ca	SS	228	STCa-6498	CATGCAAGGCAACTTCGTATTATTTT						2.386	0.0169	0	188	0.352767
44133	Ca	SS	229	STCa-6777	CATGCAATTTGGTCTTAAGGAATATA						2.386	0.0169	0	188	0.781616
184	Ca	SS	230	STCa-7191	CATGCACTTTGATTTATTTTTTGGAA						2.386	0.0169	0	188
34540	Ca	SS	231	STCa-7678	CATGCATAATCTATACAATATAAATT						2.386	0.0169	0	188	0.664233
606	Ca	SS	232	STCa-7919	CATGCATTAAGACAAAATATATTCAA						2.386	0.0169	0	188
3868	Ca	SS	233	STCa-9924	CATGCTGAGTACAATAATTATTATAA						2.386	0.0169	0	188
188	Ca	SS	234	STCa-10415	CATGCTTTAACTTTGTATTTTGATTT						2.386	0.0169	0	188
189	Ca	SS	235	STCa-11033	CATGGAATATCCTATATTTTATGGTT						2.386	0.0169	0	188
38921	Ca	SS	238	STCa-13441	CATGGCTGAGGTGGCATTTTATTTGA						2.386	0.0169	0	188	-1.66073
191	Ca	SS	242	STCa-15425	CATGGTACAGAGCTGCCGCCATAGCC						2.386	0.0169	0	188	0.302324
192	Ca	SS	243	STCa-17009	CATGTAAACTTATACATTTATTGGAT						2.386	0.0169	0	188
193	Ca	SS	245	STCa-17195	CATGTAACAGTGGAGAAGATAAACGA						2.386	0.0169	0	188	0.651283
194	Ca	SS	246	STCa-17535	CATGTAATGCCGAGTAAAATTCATTT						2.386	0.0169	0	188
36764	Ca	SS	247	STCa-19313	CATGTATTTACTTTATGATTGTTAAT						2.386	0.0169	0	188	0.962029
196	Ca	SS	248	STCa-20733	CATGTGATTTTAGTAATTTATGTTTG						2.386	0.0169	0	188	0.732849
197	Ca	SS	249	STCa-21544	CATGTGTACATTGTGTTCTTGTATTC						2.386	0.0169	0	188	0.394067
198	Ca	SS	250	STCa-21625	CATGTGTATTTTAAGGGGAAAGATGC	Q8RV99_ORYSA	Q8RV99	0.004	Serine protease inhibitor-like protein	GO:8233	2.386	0.0169	0	188	0.468753
26054	Ca	SS	253	STCa-21831	CATGTGTGGTTTGGTTTCTTTTTAGT						2.386	0.0169	0	188	0.510426
10465	Ca	SS	254	STCa-22151	CATGTTAAAGAAATTCAATAATATTG						2.386	0.00185	34.6	376
22313	Ca	SS	255	STCa-22309	CATGTTACAAAAAAAAAAAAAAAAAA						2.386	0.0169	0	188
202	Ca	SS	256	STCa-24140	CATGTTTGGTTCGGGTGGTTGTTTTC	Q9LEN8_CICAR	Q9LEN8	4e-07	Putative 14-kDa proline-rich protein	GO:6869	2.386	0.0169	0	188	-0.31061
10389	Ca	SS	258	STCa-24224	CATGTTTGTTTTATTTGTCCGCAGCT						2.386	0.0169	0	188	0.788457
204	Ca	SS	259	STCa-24280	CATGTTTTATTTGGGATGAATATGTC						2.386	0.0169	0	188
205	Ca	SS	260	STCa-16415	CATGGTTAAGAACCTACAAATGAATG	Q7M275_TOBAC	Q7M275	4e-06	NADPH-cytochrome P450 oxidoreductase (EC 1.-.-.-)	GO:0009055,GO:0005506,GO:0016491,GO:0010181,GO:0006118	2.36	6.77e-06	69.2	733
206	Ca	SS	261	STCa-13756	CATGGGAATTTGATAATAAAAGAACC						2.334	0.00274	34.6	357	0.24059
207	Ca	SS	262	STCa-21312	CATGTGGGTTGATATAGAAAGAAAAT						2.334	0.00274	34.6	357
208	Ca	SS	265	STCa-13511	CATGGCTTCAGAGTTGTTTTTGTTGT	Q6PQ37_9CARY	Q6PQ37	0.002374	Ubiquitin-conjugating enzyme family protein	GO:0004842,GO:0006512,GO:0006464	2.308	1.47e-05	69.2	696	0.424614
9523	Ca	SS	266	STCa-705	CATGAAATTGTAACATTGAAATTGAG						2.28	0.0261	0	169
11930	Ca	SS	267	STCa-726	CATGAAATTGTGCACAACCATCTATT						2.28	0.0261	0	169
211	Ca	SS	268	STCa-923	CATGAACCTAATTTGATTTGCTTTTT	Q9SWS9_PEA	Q9SWS9	0.001	Ribosomal protein S26	GO:0003735,GO:0006412,GO:0005622,GO:0005840,GO:0030529	2.28	0.0261	0	169	-0.57093
20224	Ca	SS	269	STCa-1343	CATGAAGCAGCAAAAAGTAACAGTGA	Q84UE1_MEDTR	Q84UE1	0.004	Apyrase-like protein	GO:16787	2.28	0.0261	0	169
213	Ca	SS	270	STCa-1645	CATGAATAAAATTACATAATTGGTGG						2.28	0.0261	0	169
214	Ca	SS	272	STCa-2122	CATGAATTGAAATGTATCACTATGAT	H2A_CICAR	H2A	4e-07	Histone H2A		2.28	0.0261	0	169
27671	Ca	SS	275	STCa-2190	CATGAATTTGGTCCTATGAATTAAAG						2.28	0.0261	0	169
216	Ca	SS	276	STCa-2498	CATGACATCAAGAGGTGCAAGCTACT						2.28	0.0261	0	169	-1.10866
217	Ca	SS	277	STCa-4981	CATGATGATAATCTTAAAGGTGTTTT						2.28	0.0261	0	169
218	Ca	SS	278	STCa-5510	CATGATGTTTGAAAGTTCAATTCGAG						2.28	0.0261	0	169
12308	Ca	SS	279	STCa-5531	CATGATTAAATTGTCATCTTATCTGA						2.28	0.0261	0	169
42744	Ca	SS	280	STCa-5949	CATGATTTCATTTTATCAGTTTCCTG						2.28	0.0261	0	169
221	Ca	SS	282	STCa-6093	CATGCAAAAATGAGGAACTTTTTATT						2.28	0.0261	0	169
222	Ca	SS	283	STCa-6129	CATGCAAAATGGTTCTCAAGTTTGGA						2.28	0.0261	0	169
10949	Ca	SS	285	STCa-6259	CATGCAAATCGAATCGGTTTAAATGC						2.28	0.0261	0	169	0.696641
224	Ca	SS	286	STCa-6603	CATGCAATAATTTTACATTTCCTTAG	Q84TM8_MEDSA	Q84TM8	0.007	Polygalactorunase PG11 precursor	GO:0004650,GO:0016787,GO:0016798,GO:0008152,GO:0005975	2.28	0.0261	0	169
15130	Ca	SS	287	STCa-7115	CATGCACTCTCTGTAAAGAAAGCTGT						2.28	0.0261	0	169
35004	Ca	SS	291	STCa-7388	CATGCAGCTTTACAACTTAATAATAT	Q945F2_CICAR	Q945F2	4e-07	Aldolase	GO:	2.28	0.0261	0	169	-0.642454
15343	Ca	SS	293	STCa-7447	CATGCAGGGGTTTGATTTTTGGATGT						2.28	0.0261	0	169
12031	Ca	SS	295	STCa-7551	CATGCAGTCATTATGCTCCTTTTCAT						2.28	0.0261	0	169
3205	Ca	SS	296	STCa-8045	CATGCATTGTTACTTAGTTTTTCATC	Q7DLT8_CICAR	Q7DLT8	4e-07	CaM protein	GO:5509	2.28	0.00404	34.6	338
29084	Ca	SS	298	STCa-8536	CATGCCCAGGAAACGTCTCAGGGGTT						2.28	0.0261	0	169
232	Ca	SS	299	STCa-8648	CATGCCGAGTAGTAGTAGTAGTAGTC						2.28	0.0261	0	169
233	Ca	SS	300	STCa-9004	CATGCGACTCTTAAATTATATTATGT						2.28	0.0261	0	169
27104	Ca	SS	301	STCa-9314	CATGCGTGCGAAAGTACGAACAAAGG						2.28	0.0261	0	169
235	Ca	SS	303	STCa-9974	CATGCTGCCATTCGTGCTGATCCTTC	RL5_CUCSA	Q6UNT2	2e-05	60S ribosomal protein L5	GO:0003735,GO:0003723,GO:0019843,GO:0008097,GO:0006412,GO:0005622,GO:0005840,GO:0030529	2.28	0.0261	0	169
236	Ca	SS	305	STCa-10241	CATGCTTATTATTGAATAAACAATTA						2.28	0.0261	0	169
237	Ca	SS	308	STCa-10280	CATGCTTCCGTTCAGATCAACATTGG	RS21_ORYSA	P35687	2e-05	40S ribosomal protein S21		2.28	0.0261	0	169
238	Ca	SS	309	STCa-10536	CATGGAAAAAAAAAAAAAAAAAACTA						2.28	0.0261	0	169
239	Ca	SS	310	STCa-10804	CATGGAACTAGAAGCTGCAAACAAGT						2.28	0.0261	0	169
240	Ca	SS	312	STCa-11132	CATGGAATGTTTTACCTTGTGTGGTT	KC1D_ARATH	P42158	1e-06	Casein kinase I isoform delta-like (EC 2.7.11.1) (CKI-delta)	GO:0004672,GO:0005524,GO:0000166,GO:0004674,GO:0016301,GO:0016740,GO:0006468	2.28	0.0261	0	169
241	Ca	SS	313	STCa-11740	CATGGAGAGTTGAGAAATTGAGAGGG						2.28	0.0261	0	169	-1.18744
242	Ca	SS	316	STCa-13989	CATGGGATATTGAATTCGAGCAGAAA						2.28	0.0261	0	169
243	Ca	SS	318	STCa-14074	CATGGGATTTAGATGGTTTTTCAAAG						2.28	0.00404	34.6	338	0.180653
244	Ca	SS	321	STCa-14211	CATGGGCCACAACCATCAATCATATG						2.28	0.0261	0	169
245	Ca	SS	322	STCa-14940	CATGGGTAAGCTAGGGACACTTGAGG	Q93XA1_PHAVU	Q93XA1	7e-06	TGA-type basic leucine zipper protein TGA2.1 (BZIP)	GO:0003677,GO:0043565,GO:0046983,GO:0003700,GO:0006355,GO:0005634	2.28	0.0261	0	169
246	Ca	SS	324	STCa-15241	CATGGGTTCAAGACAGTCAAATCCTT	Q9FN41_ARATH	Q9FN41	4e-06	Similarity to enolase-phosphatase (At5g53850)	GO:0003824,GO:0046872,GO:0008967,GO:0008152	2.28	0.0261	0	169
7569	Ca	SS	325	STCa-15506	CATGGTAGTAAACTTACTAGTTGTGT	Q9M640_MAIZE	Q9M640	7e-05	Delta-COP	GO:0006810,GO:0006886,GO:0030125	2.28	0.0261	0	169
29638	Ca	SS	327	STCa-16257	CATGGTGGTTTTATGATAATTAAAGG	Q9FMW4_ARATH	Q9FMW4	0.004	Similarity to ABA-responsive protein (ABA-R)	GO:	2.28	0.0261	0	169
249	Ca	SS	330	STCa-16760	CATGGTTTAATTTTGCTGCTGAAGGA	O81921_CICAR	O81921	4e-07	Elongation factor 1-alpha; EF1-a	GO:0003924,GO:0000166,GO:0003746,GO:0005525,GO:0006412	2.28	0.0261	0	169
250	Ca	SS	331	STCa-16778	CATGGTTTATTAAGCTTTGAGCATCC						2.28	0.0261	0	169
6523	Ca	SS	332	STCa-16878	CATGTAAAAAAAAAAAAAAAAAACTA						2.28	0.0261	0	169
252	Ca	SS	333	STCa-17089	CATGTAAATATTGAATTCGAGCAGAA						2.28	0.0261	0	169
15091	Ca	SS	334	STCa-17272	CATGTAACTCTAAGGATATATTCATC						2.28	0.0261	0	169
254	Ca	SS	335	STCa-17462	CATGTAATATAAAATTAAAATTCTGT						2.28	0.0261	0	169
16514	Ca	SS	336	STCa-18230	CATGTAGAGATTGAAATGAAAATTAA						2.28	0.0261	0	169
2716	Ca	SS	337	STCa-19424	CATGTCAAAGGTTAGTTCGAGTACAT						2.28	0.0261	0	169	0.971536
257	Ca	SS	338	STCa-19704	CATGTCATTTCTATCCACAAAAAAAA						2.28	0.0261	0	169
2717	Ca	SS	339	STCa-24349	CATGTTTTGATTGTTTTCTTGTGGAA	G2OX_PHACN	G2OX	0.0001	Gibberellin 2-beta-dioxygenase (EC 1.14.11.13) (Gibberellin 2-beta- hydroxylase) (Gibberellin 2-oxidase) (GA 2-oxidase)	GO:0045543,GO:0016216,GO:0016702,GO:0005506,GO:0016491,GO:0046872,GO:0017000	2.28	0.0261	0	169
259	Ca	SS	340	STCa-24395	CATGTTTTGTGCCAAAAATCCATTTT	IFR_CICAR	IFR	0.0001	Isoflavone reductase; NADPH:isoflavone oxidoreductase; 2'-hydroxyisoflavone reductase; IFR	GO:0016564,GO:0016491,GO:0047526,GO:0006808	2.28	0.0261	0	169
260	Ca	SS	341	STCa-24453	CATGTTTTTTCTTTCCTTGTGTACTT	Q8L5G0_CICAR	Q8L5G0	4e-07	Tonoplast intrinsic protein	GO:0005215,GO:0006810,GO:0016020,GO:0016021	2.28	0.0261	0	169
13169	Ca	SS	344	STCa-8945	CATGCGAACAGGTGGAATTGGTGCTA	O24458_ARATH	O24458	4e-07	Pyruvate dehydrogenase E1 beta subunit (EC 1.2.4.1) (Pyruvate dehydrogenase E1 beta subunit, putative)	GO:0016491,GO:0004739	2.223	0.00595	34.6	320
262	Ca	SS	345	STCa-10354	CATGCTTGGCTGGCTTCATTGATATT						2.223	0.00595	34.6	320	0.0440169
263	Ca	SS	347	STCa-21285	CATGTGGGTCTACCAAAGTAATGAAA						2.223	0.00595	34.6	320
265	Ca	SS	348	STCa-89	CATGAAAACAAAGGTGAGAAGAAAAA	Q941N0_9FABA	Q941N0	0.0003	Drought-induced protein	GO:0009415,GO:0006950	2.162	0.0403	0	150
28191	Ca	SS	349	STCa-1016	CATGAACTATGTAGACCATTGTTTTT	O65844_MEDSA	O65844	4e-07	Protein phosphatase 1, catalytic beta subunit	GO:16787	2.162	0.0403	0	150
267	Ca	SS	350	STCa-1131	CATGAAGAAGAGAGATTTTTAAGGTG	Q70FG7_BETVU	Q70FG7	0.002	4,5-DOPA dioxygenase extradiol	GO:0016702,GO:0016491,GO:0008198,GO:0006118,GO:0006725	2.162	0.0403	0	150
268	Ca	SS	351	STCa-1224	CATGAAGAGATGCGCGGAGATCCTTT	Q6K703_ORYSA	Q6K703	0.004	Receptor protein kinase-like (RLK)	GO:0004672,GO:0005524,GO:0000166,GO:0004872,GO:0004674,GO:0016301,GO:0016740,GO:0006468	2.162	0.0403	0	150
23402	Ca	SS	353	STCa-1630	CATGAAGTTTTAGTCTATCAAAAAAA						2.162	0.0403	0	150
24093	Ca	SS	354	STCa-2134	CATGAATTGCCATAAAAAAAACATTT						2.162	0.0403	0	150
271	Ca	SS	355	STCa-3123	CATGAGAATTGTAACTAAAAACTGTT						2.162	0.0403	0	150
28993	Ca	SS	356	STCa-5366	CATGATGTAATTTGTAAATAAAATAT	Q9ZRD8_SOYBN	Q9ZRD8	0.009382	GMFP5 (Fragment)	GO:0046872,GO:0030001	2.162	0.0403	0	150
273	Ca	SS	357	STCa-6740	CATGCAATTCTGTCATAAAATAGGTC						2.162	0.0403	0	150
274	Ca	SS	361	STCa-6747	CATGCAATTGGAAAGAAAAAGAACAT						2.162	0.0403	0	150
275	Ca	SS	362	STCa-7509	CATGCAGTAGTTGCTTAGGAAATCCA						2.162	0.0403	0	150
40158	Ca	SS	364	STCa-7584	CATGCAGTGTAAACTGTATATTATAT	Q84QD9_TOBAC	Q84QD9	0.004	Avr9/Cf-9 induced kinase 1	GO:0004672,GO:0005524,GO:0000166,GO:0004674,GO:0004713,GO:0016301,GO:0016740,GO:0006468,GO:0016020	2.162	0.0403	0	150
277	Ca	SS	366	STCa-7719	CATGCATAGAAAAAAAAAAAAAAAAA						2.162	0.0403	0	150
18707	Ca	SS	367	STCa-8434	CATGCCATCTGCAATCTATGGTTTGT	Q8GT87_GOSBA	Q8GT87	7e-05	Fiber protein Fb2	GO:	2.162	0.00875	34.6	301	0.765933
279	Ca	SS	371	STCa-8444	CATGCCATTCATCATCTTTTTTTTTC						2.162	0.0403	0	150	0.444686
280	Ca	SS	372	STCa-8989	CATGCGACAGTCTCTTGGATGCAGAT						2.162	0.0403	0	150
19424	Ca	SS	373	STCa-9190	CATGCGGCTTCAATTTTGATTCATTT						2.162	0.0403	0	150
282	Ca	SS	374	STCa-9523	CATGCTACTCTCCCGATTGTTTCTTG						2.162	0.0403	0	150
19384	Ca	SS	375	STCa-9919	CATGCTGAGGCATTGTTAAATTATCT						2.162	0.0403	0	150
284	Ca	SS	379	STCa-9933	CATGCTGATATGAACAGATTTGAATG	Q1SAV8_MEDTR	Q1SAV8	0.0001	Putative desacetoxyvindoline 4-hydroxylase	GO:	2.162	0.00875	34.6	301	0.84501
285	Ca	SS	380	STCa-10071	CATGCTGTACAAGCACAACAAAATTA						2.162	0.00875	34.6	301	-0.719491
33548	Ca	SS	382	STCa-10343	CATGCTTGGAAATGGTCTTGAGGCTC						2.162	0.0403	0	150
287	Ca	SS	383	STCa-10572	CATGGAAAAGATAGCTACAATGTTTT						2.162	0.0403	0	150
35297	Ca	SS	384	STCa-10576	CATGGAAAATAGATTATGCTGATTTG						2.162	0.0403	0	150
289	Ca	SS	386	STCa-10897	CATGGAAGATTACATCTAAAAAAAAA						2.162	0.0403	0	150
290	Ca	SS	387	STCa-11027	CATGGAATAGGAACCCAGGAGGACAT	Q9XQB4_PHAAU	Q9XQB4	0.026	Photosystem I reaction center subunit III	GO:0015979,GO:0009538	2.162	0.0403	0	150
291	Ca	SS	388	STCa-11038	CATGGAATATTTAGCTCTGTAAGGGC						2.162	0.0403	0	150
36888	Ca	SS	389	STCa-11456	CATGGACGAGTTTCCTTCATTTGTTT						2.162	0.0403	0	150
29341	Ca	SS	390	STCa-12187	CATGGATATGGTGTATAATATTAATA						2.162	0.0403	0	150
294	Ca	SS	391	STCa-12195	CATGGATATTGAATTCGAGCAGAAAG						2.162	0.0403	0	150	-0.742337
296	Ca	SS	392	STCa-12375	CATGGATGGAGAGTTTTTCTTGTGAG						2.162	0.0403	0	150
297	Ca	SS	394	STCa-12554	CATGGATTTGAGCGGATTTTGAATTC						2.162	0.0403	0	150
42225	Ca	SS	395	STCa-12590	CATGGCAAACAATCATTTTGAATATA	Q9LR30_ARATH	Q9LR30	7e-05	F26F24.16 (Putative alanine aminotransferase) (At1g23310/F26F24_4) (Glutamate:glyoxylate aminotransferase 1)	GO:0016847,GO:0008483,GO:0016769,GO:0016740,GO:0009058	2.162	0.0403	0	150	-0.687165
4735	Ca	SS	397	STCa-13714	CATGGGAATATTAATGATACATTCCT						2.162	0.0403	0	150
300	Ca	SS	398	STCa-13749	CATGGGAATTTATTATTTTCGAGCAG						2.162	0.0403	0	150
301	Ca	SS	399	STCa-14390	CATGGGCTTAAAGAACGTTAGTTTAT						2.162	0.0403	0	150
302	Ca	SS	401	STCa-14744	CATGGGGCGGTTTACTTAAAGTCTAA						2.162	0.0403	0	150
12842	Ca	SS	403	STCa-14918	CATGGGGTTGGTTATCCTCTTGCAAC						2.162	0.0403	0	150
304	Ca	SS	404	STCa-15183	CATGGGTTAATAATTAACCATATGGT						2.162	0.00875	34.6	301	1.19574
981	Ca	SS	405	STCa-15259	CATGGGTTGGCCATTATTTTGTTTAG						2.162	0.0403	0	150	0.82549
306	Ca	SS	406	STCa-15605	CATGGTATGTACCATATAACTATAAT						2.162	0.0403	0	150
307	Ca	SS	407	STCa-16163	CATGGTGGGAGATTGTAATATTGTAT	Q84L58_CICAR	Q84L58	4e-07	1-aminocyclopropane-1-carboxylic acid oxidase	GO:0005506,GO:0016491	2.162	0.00875	34.6	301	0.783445
308	Ca	SS	410	STCa-16211	CATGGTGGTCATAAACTTCTTAAAAC						2.162	0.0403	0	150	0.4389
35291	Ca	SS	411	STCa-16244	CATGGTGGTTGAAATTGAAAAGGCTT						2.162	0.0403	0	150
28919	Ca	SS	413	STCa-16525	CATGGTTATTTATTTAACCATACGAG	Q84WK9_ARATH	Q84WK9	0.001	At4g33985	GO:	2.162	0.0403	0	150
311	Ca	SS	414	STCa-16528	CATGGTTCAAAAGTGTTGATCAACTT	Q2HVN7_MEDTR	Q2HVN7	5e-07	Exostosin-like	GO:16020	2.162	0.0403	0	150
312	Ca	SS	416	STCa-17329	CATGTAAGATTGTATTTAATAGATAA						2.162	0.00875	34.6	301	0.728032
313	Ca	SS	417	STCa-17613	CATGTAATTCTCAATGAGATGTATGT						2.162	0.0403	0	150
314	Ca	SS	419	STCa-18728	CATGTATAGATTAGATAACATATATG						2.162	0.0403	0	150
315	Ca	SS	422	STCa-19227	CATGTATTCAGATGGATCGACTACAC						2.162	0.0403	0	150
316	Ca	SS	423	STCa-19616	CATGTCAGTTTTTAAGCTACCTTAAT						2.162	0.0403	0	150
317	Ca	SS	424	STCa-20010	CATGTCTAACTACTTCTAATTTGATT						2.162	0.0403	0	150
43142	Ca	SS	425	STCa-20404	CATGTGAATAGAACTTAATGGAAAAT						2.162	0.0403	0	150
32185	Ca	SS	426	STCa-20531	CATGTGAGAGACAAGAGAGGTTCAAT						2.162	0.0403	0	150
13878	Ca	SS	427	STCa-20552	CATGTGAGCTGCATTAAAAAATGGTT	Q9ZWJ0_PEA	Q9ZWJ0	0.0001	DNA binding zinc finger protein; Pspzf	GO:0005515,GO:0008270,GO:0046872	2.162	0.0403	0	150
13879	Ca	SS	430	STCa-22243	CATGTTAATGAATTGTTGGAGTTTAG						2.162	0.0403	0	150
5521	Ca	SS	431	STCa-22398	CATGTTACTTTATGTGTCTTTTTCTT	O65745_CICAR	O65745	4e-07	Hypothetical protein	GO:	2.162	0.0403	0	150
38768	Ca	SS	432	STCa-22590	CATGTTATGCTAGATGGAAACTTAAT						2.162	0.0403	0	150
324	Ca	SS	433	STCa-22816	CATGTTCAGTTTAGTGCATATATTAT	Q8W589_ARATH	Q8W589	2e-05	At1g16840/F17F16.27	GO:	2.162	0.0403	0	150
325	Ca	SS	434	STCa-22959	CATGTTCTATTCATATATTTAATAAG						2.162	0.0403	0	150
326	Ca	SS	435	STCa-22993	CATGTTCTGATTTATAGTTTTATTTT	Q70XK1_HORVD	Q70XK1	0.004	ADP-ribosylation factor 1-like protein	GO:0000166,GO:0005525,GO:0015031,GO:0007264,GO:0006810,GO:0006888,GO:0005622	2.162	0.0403	0	150	0.809151
22209	Ca	SS	436	STCa-23488	CATGTTGGTGCAATGTAAAGTTTTTT						2.162	0.0403	0	150
328	Ca	SS	437	STCa-23726	CATGTTTAACTTGTAAATCATTTTTA						2.162	0.0403	0	150
22210	Ca	SS	440	STCa-24162	CATGTTTGTATGTTATATATATTCAC						2.162	0.0403	0	150	0.511625
330	Ca	SS	441	STCa-6410	CATGCAACTTTAATATTAAACCTATG						2.147	0	277	2370	0.0610951
8179	Ca	SS	443	STCa-9146	CATGCGGAGTTTATGCAGTGCTTTGT	Q7XAC3_VICFA	Q7XAC3	7e-05	Peptide transporter 1	GO:0005215,GO:0006810,GO:0006857,GO:0016020,GO:0016021	2.098	0.0128	34.6	282
332	Ca	SS	445	STCa-14989	CATGGGTATGCTTAGTTACTTTTATC	Q9FFD8_ARATH	Q9FFD8	0.0003	Gb|AAF26981.1 (At5g16470)	GO:0003676,GO:0008270,GO:0045449,GO:0005622	2.098	0.0128	34.6	282	0.0119286
333	Ca	SS	447	STCa-16215	CATGGTGGTCTTAGACTTTTGGACAC	E13L3_ARATH	Q9SD84	2e-05	Glucan endo-1,3-beta-glucosidase-like protein 3 precursor (B-glucosidase)	GO:0048503,GO:0016020,GO:0031225	2.098	0.0128	34.6	282	0.0497421
334	Ca	SS	448	STCa-20347	CATGTGAACTTAGGTTTGTTTATGTT						2.098	0.0128	34.6	282
335	Ca	SS	449	STCa-22470	CATGTTAGTGCTTGGGTGGCTGATAT	Q948X4_MEDSA	Q948X4	7e-08	Glutathione S-transferase	GO:16740	2.047	2.29e-07	138	1070	1.66978
336	Ca	SS	452	STCa-86	CATGAAAAATTGTATGCTGCATTATC	Q2WGL8_LOTJA	Q2WGL8	5e-07	Beta-amyrin synthase	GO:0003824,GO:0016829,GO:0008152	2.029	0.0622	0	132
337	Ca	SS	453	STCa-261	CATGAAACAAAATAACCTCAAATAAT						2.029	0.0622	0	132
9700	Ca	SS	456	STCa-437	CATGAAAGATTTGGTTTTGGATTGTT						2.029	0.0622	0	132	0.223144
339	Ca	SS	458	STCa-467	CATGAAAGCTTTCAAAAACTATGTTG						2.029	0.0622	0	132
340	Ca	SS	460	STCa-723	CATGAAATTGTATATATCCTATGCTG	Q93Y40_ARATH	Q93Y40	0.0003	Oxysterol-binding protein	GO:8202	2.029	0.0622	0	132
341	Ca	SS	462	STCa-1001	CATGAACTAGTTTGATCCTCTTATGT						2.029	0.0622	0	132
342	Ca	SS	465	STCa-1407	CATGAAGCTTTTAGAGTTGTTTTTGT	Q9M3Z7_CICAR	Q9M3Z7	4e-07	Trypsin protein inhibitor 2	GO:4866	2.029	0.0187	34.6	263
343	Ca	SS	466	STCa-1460	CATGAAGGCCTAGAAATATAATTAAT						2.029	0.0622	0	132
344	Ca	SS	467	STCa-1787	CATGAATCAATGTTTTATTTCATTTT						2.029	0.0622	0	132
345	Ca	SS	469	STCa-2221	CATGACAAAAAAAAAAAAAAAAAACT						2.029	0.0622	0	132
346	Ca	SS	472	STCa-3442	CATGAGCTGTGTATGTTACAAACTTT						2.029	0.0187	34.6	263
35393	Ca	SS	474	STCa-3643	CATGAGGCTGAGATTGCCCAAGCTGC	Q9FSZ5_CICAR	Q9FSZ5	4e-07	GTP-binding protein	GO:0005525,GO:0007264,GO:0006886,GO:0000178	2.029	0.0622	0	132
348	Ca	SS	475	STCa-3905	CATGAGTGAGCAAGTTTGTATTGGTT						2.029	0.0622	0	132
349	Ca	SS	476	STCa-4312	CATGATAGCTTGCGTCTATTACAACT	Q84V02_CITLI	Q84V02	7e-05	Vacuolar membrane ATPase subunit c''	GO:0046933,GO:0046961,GO:0015986,GO:0016020,GO:0016469,GO:0016021	2.029	0.0622	0	132
350	Ca	SS	477	STCa-4380	CATGATATACTTTTGGAGATCTTTAT	Q6K6Z4_ORYSA	Q6K6Z4	0.004	KH domain-containing protein NOVA-like	GO:0003676,GO:0003723	2.029	0.0622	0	132
351	Ca	SS	478	STCa-4516	CATGATCAAAACCACTAACATAATAG						2.029	0.0622	0	132
352	Ca	SS	479	STCa-5038	CATGATGATGTTAACTGTTTTTTTGA						2.029	0.0622	0	132
353	Ca	SS	480	STCa-5172	CATGATGGAAAATATAATGTGAATGA						2.029	0.0622	0	132
354	Ca	SS	484	STCa-6006	CATGATTTGTGATTTATGCCTCCTTT	Q1SJW7_MEDTR	Q1SJW7	0.0001	GroEL-like chaperone, ATPase	GO:0005524,GO:0051082,GO:0005515,GO:0006457,GO:0044267	2.029	0.0622	0	132	0.534151
11022	Ca	SS	485	STCa-6067	CATGCAAAAAAAAAAAAAAAAAAACT						2.029	0.0622	0	132
40414	Ca	SS	487	STCa-6380	CATGCAACGTTTGGGGGTTTTAACTT						2.029	0.0622	0	132
357	Ca	SS	488	STCa-6402	CATGCAACTTACTTCCGGTGGTTATT						2.029	0.0622	0	132
22330	Ca	SS	490	STCa-6429	CATGCAAGAACAAGTGGGGAATGAGA	Q9LH72_ARATH	Q9LH72	2e-05	Arabidopsis thaliana genomic DNA, chromosome 3, BAC clone: T21E2	GO:	2.029	0.0622	0	132
359	Ca	SS	492	STCa-6804	CATGCACAACTGGGATAAAAATATTT						2.029	0.0187	34.6	263
360	Ca	SS	493	STCa-7376	CATGCAGCTACAAAAATATAAATAAA						2.029	0.0622	0	132
361	Ca	SS	494	STCa-7417	CATGCAGGCAAGTAAATCAGTGTCTG	Q9M378_ARATH	Q9M378	0.000152	TATA box binding protein (TBP) associated factor (TAF)-like protein	GO:0005488,GO:0003677,GO:0005524,GO:0003676,GO:0004386	2.029	0.0622	0	132
362	Ca	SS	495	STCa-7917	CATGCATTAAATAATCTTGAAGATTA	Q5CCK1_ORYSA	Q5CCK1	0.002	Cytochrome P450; Cytochrome P450 family protein, expressed	GO:0004497,GO:0005506,GO:0016491,GO:0020037,GO:0046872,GO:0006118,GO:0016021	2.029	0.0622	0	132
363	Ca	SS	497	STCa-8112	CATGCCAAAACATCACTTAATCAACC	5NG4_PINTA	5NG4	0.004	Auxin-induced protein 5NG4	GO:0006810,GO:0009734,GO:0016020,GO:0005737,GO:0005887,GO:0005938,GO:0016021	2.029	0.0622	0	132
364	Ca	SS	498	STCa-8350	CATGCCACTTAGGGTTGATATTTTCT						2.029	0.0622	0	132	-0.531028
365	Ca	SS	499	STCa-8410	CATGCCATACATTATGGCAATTTACA						2.029	0.0622	0	132
40502	Ca	SS	500	STCa-8741	CATGCCTACTGTATCTTCAAGTTTTG	Q9SW88_CANLI	Q9SW88	2e-05	Amine oxidase	GO:5507	2.029	0.0622	0	132
32987	Ca	SS	501	STCa-9401	CATGCTAAAGAAAAAATTCAATGATG						2.029	0.0622	0	132
368	Ca	SS	502	STCa-9405	CATGCTAAAGCGAGAACTGCATTTTT						2.029	0.0622	0	132
20225	Ca	SS	503	STCa-9799	CATGCTCGTCTTCGTCAGTGGTAATC	Q9FZK4_ARATH	Q9FZK4	2e-05	F17L21.10 (Similar to nuclear transport factor 2)	GO:0008536,GO:0006606,GO:0006810,GO:0006913,GO:0005737,GO:0005622,GO:0005635,GO:0005634	2.029	0.0622	0	132
370	Ca	SS	504	STCa-9838	CATGCTCTTCAACTATCATAAATTTA						2.029	0.0622	0	132
41300	Ca	SS	505	STCa-9892	CATGCTGAATGAGGCTCCTTAATAAG						2.029	0.0622	0	132
30864	Ca	SS	508	STCa-9898	CATGCTGAATTTCAAGAAAGGAAAAA						2.029	0.0622	0	132
373	Ca	SS	510	STCa-10028	CATGCTGGATTTGTTTTTTATAATTC						2.029	0.0622	0	132
374	Ca	SS	511	STCa-10201	CATGCTTAGAGAGAAATAATCAACAT						2.029	0.0622	0	132
16422	Ca	SS	512	STCa-10228	CATGCTTATCAAATGTGGTTATGTTT						2.029	0.0622	0	132
376	Ca	SS	513	STCa-10316	CATGCTTCTTTGGCTGAAATGGTGTG	Q9FXS6_TOBAC	Q9FXS6	0.001	NtEIG-E80 protein	GO:	2.029	0.0622	0	132
377	Ca	SS	516	STCa-10523	CATGCTTTTTGTCTTTTGATTTGTAG						2.029	0.0622	0	132	0.303063
22157	Ca	SS	518	STCa-10531	CATGGAAAAAAAAAAAAAAAAAAACT						2.029	0.0622	0	132
380	Ca	SS	519	STCa-10540	CATGGAAAAAAAAAAAAAAAAACTAG						2.029	0.0622	0	132
382	Ca	SS	522	STCa-10704	CATGGAAATGAGTAACTGTTGTGTTG						2.029	0.0622	0	132
384	Ca	SS	524	STCa-11026	CATGGAATAGGAAAGAAGGAATGACT						2.029	0.0622	0	132
386	Ca	SS	525	STCa-11031	CATGGAATAGTGAATTCGAGCAGAAA						2.029	0.0622	0	132
388	Ca	SS	526	STCa-11127	CATGGAATGTTATCAGAGCCCATTTC						2.029	0.0622	0	132
389	Ca	SS	527	STCa-11172	CATGGAATTTCTTAAGAAGGTCTAAG	COMT1_MEDSA	P28002	2e-05	Caffeic acid 3-O-methyltransferase (EC 2.1.1.68) (S-adenosysl-L- methionine:caffeic acid 3-O-methyltransferase) (COMT) (CAOMT)	GO:0008171,GO:0047763,GO:0008168,GO:0016740,GO:0009809	2.029	0.0622	0	132
390	Ca	SS	528	STCa-11960	CATGGAGGGGAAATATTGCAAGTGTG						2.029	0.0622	0	132
391	Ca	SS	530	STCa-12105	CATGGATAAAGTAGAAGAGATGTTGG						2.029	0.0622	0	132
22207	Ca	SS	531	STCa-12131	CATGGATAATTCCTTCTATGTAAATG						2.029	0.0622	0	132
22208	Ca	SS	533	STCa-12422	CATGGATGTGAAAGGAAATATTGATG						2.029	0.0187	34.6	263	0.1415
396	Ca	SS	534	STCa-12606	CATGGCAAATCTTAAGTTGTCATATC	GLO2O_ARATH	Q9C8L4	0.002374	Putative hydroxyacylglutathione hydrolase 3, mitochondrial precursor (EC 3.1.2.6) (Glyoxalase II) (Glx II)	GO:0005506,GO:0030145,GO:0004416,GO:0016787,GO:0008270,GO:0046872,GO:0005739	2.029	0.0622	0	132
4532	Ca	SS	536	STCa-12633	CATGGCAAGCTATATAGTCTATTATA						2.029	0.0622	0	132
401	Ca	SS	538	STCa-12638	CATGGCAAGGCAGAGGATTACTGGGA	Q69Q88_ORYSA	Q69Q88	0.0003	26S proteasome regulatory subunit-like protein	GO:0005515,GO:0043234,GO:0005829	2.029	0.0622	0	132
402	Ca	SS	539	STCa-12652	CATGGCAATAGCTTTGGTCTGAGGTA						2.029	0.0622	0	132
11309	Ca	SS	540	STCa-12845	CATGGCATCAAGGCTTATCAGATGGA						2.029	0.0622	0	132
405	Ca	SS	541	STCa-12956	CATGGCCAACTCTTTTATTTTTATTT						2.029	0.0622	0	132
407	Ca	SS	542	STCa-13453	CATGGCTGCCACCATCAAACAAATGG						2.029	0.0622	0	132
408	Ca	SS	543	STCa-13480	CATGGCTGTAGATAATGCTGCAGAAG	Q9ZRW0_CICAR	Q9ZRW0	4e-07	Nucleolar protein	GO:	2.029	0.0622	0	132
411	Ca	SS	544	STCa-13536	CATGGCTTGCAATAATAAAATGATTC						2.029	0.0622	0	132
413	Ca	SS	545	STCa-13877	CATGGGAGCCGTTGTAACATATTTAA	ALA4_ARATH	Q9LNQ4	7e-08	Putative phospholipid-transporting ATPase 4 (EC 3.6.3.1) (Aminophospholipid flippase 4)	GO:0003824,GO:0000287,GO:0005524,GO:0000166,GO:0016787,GO:0016887,GO:0015662,GO:0046872,GO:0004012,GO:0008152,GO:0006810,GO:0006812,GO:0016020,GO:0016021	2.029	0.0622	0	132
416	Ca	SS	548	STCa-13944	CATGGGAGTGGAAACGACTGCTATTA						2.029	0.0622	0	132
420	Ca	SS	549	STCa-13985	CATGGGATATCAAATGCAACTTTTAT						2.029	0.0622	0	132
427	Ca	SS	550	STCa-14904	CATGGGGTGTACTTTAATTGGTGTGA						2.029	0.0622	0	132
29382	Ca	SS	551	STCa-14936	CATGGGTAAGCAAATATAGCTAATAT	MT1_CICAR	MT1	0.0001	Metallothionein-like protein 1; MT-1	GO:46872	2.029	0.0622	0	132
429	Ca	SS	553	STCa-15017	CATGGGTCCCGATTTTCGAGTTTTGG	PSA2A_ARATH	O23708	1e-07	Proteasome subunit alpha type 2-A (EC 3.4.25.1) (20S proteasome alpha subunit B) (Proteasome component 3)	GO:0008233,GO:0004175,GO:0016787,GO:0004298,GO:0006511,GO:0043234,GO:0005829,GO:0005634,GO:0005839	2.029	0.0622	0	132
9760	Ca	SS	556	STCa-15289	CATGGGTTTGTAAATAATATTCCTAG						2.029	0.0622	0	132
433	Ca	SS	557	STCa-15359	CATGGTAACCATATGTTTTATTCTTT	Q9FXI1_ARATH	Q9FXI1	2e-05	F6F9.12 protein	GO:	2.029	0.0622	0	132
438	Ca	SS	558	STCa-15769	CATGGTCCTACTTACCTAATTTATTA						2.029	0.0622	0	132
439	Ca	SS	559	STCa-15914	CATGGTGACACCTTGTGATCATTTTC						2.029	0.0622	0	132
440	Ca	SS	560	STCa-16320	CATGGTGTGGGGTCGGAGATGAATTC	Q9SP48_SOYBN	Q9SP48	0.001	Homeodomain-leucine zipper protein 56	GO:0003677,GO:0043565,GO:0003700,GO:0045449,GO:0006355,GO:0005634	2.029	0.0622	0	132
441	Ca	SS	561	STCa-16556	CATGGTTCCAATGGACCAGCCCAAGG	CBPX_PEA	CBPX	4e-07	Serine carboxypeptidase-like	GO:0008233,GO:0004185,GO:0016787,GO:0004180,GO:0006508	2.029	0.0187	34.6	263
18047	Ca	SS	563	STCa-16791	CATGGTTTCATTGTTTGTTTATGTTT	MT2_CICAR	MT2	4e-07	Metallothionein-like protein 2; MT-2	GO:46872	2.029	0.0622	0	132
443	Ca	SS	564	STCa-16844	CATGGTTTTAATTTATCTTAATGTGT						2.029	0.0622	0	132
36054	Ca	SS	565	STCa-16958	CATGTAAAATGTTCATAAATTATACT						2.029	0.0622	0	132
30388	Ca	SS	566	STCa-17068	CATGTAAATAGAACTTAAAATATATC						2.029	0.0622	0	132
8000	Ca	SS	569	STCa-17562	CATGTAATGTCCATTTCAATATTGCA						2.029	0.0622	0	132
448	Ca	SS	570	STCa-17669	CATGTACAAAAAAAAAAAAAAAAAAA						2.029	0.0622	0	132
450	Ca	SS	572	STCa-18201	CATGTAGACAATATTATATTGGTAAC						2.029	0.0622	0	132
451	Ca	SS	573	STCa-18406	CATGTAGGAATCAATGAATAAATTAG						2.029	0.0622	0	132
454	Ca	SS	574	STCa-18675	CATGTATACAAGACCTTAAATGTTTA						2.029	0.0622	0	132
455	Ca	SS	576	STCa-19107	CATGTATGTATGAATGTATTATAATG	P94077_ARATH	P94077	0.009382	Zinc-finger protein Lsd1	GO:	2.029	0.0622	0	132
457	Ca	SS	577	STCa-19148	CATGTATGTTCACAACTAAAATTAAA						2.029	0.0622	0	132	-0.549913
6200	Ca	SS	578	STCa-19273	CATGTATTGCAATTAAGGTAGTTGCT						2.029	0.0622	0	132
460	Ca	SS	579	STCa-20004	CATGTCTAAAATAAATGGAAATAATC						2.029	0.0622	0	132
461	Ca	SS	580	STCa-20124	CATGTCTGCTAAGCCAATTCAGAATG						2.029	0.0622	0	132
462	Ca	SS	581	STCa-20266	CATGTCTTTTTGGTAGAGTTTGCTTT						2.029	0.0622	0	132
463	Ca	SS	582	STCa-20707	CATGTGATTAGTATCTCTTGAAGTAG						2.029	0.0622	0	132	1.04767
42911	Ca	SS	583	STCa-21954	CATGTGTTAGAGGAAGGCAACCCACT	Q5DUG9_CICAR	Q5DUG9	0.002	S-adenosyl-L-homocysteine hydrolase	GO:0016787,GO:0004013,GO:0006730	2.029	0.0622	0	132
465	Ca	SS	584	STCa-21969	CATGTGTTATCTTTTTTTAATTTATG						2.029	0.0622	0	132
466	Ca	SS	585	STCa-22264	CATGTTAATGTACTGACTAAAAGAGG						2.029	0.0622	0	132
467	Ca	SS	587	STCa-22302	CATGTTAATTTTCTTGCCAGCTGGGG	Q9SNY9_SOLTU	Q9SNY9	0.002	Branched-chain amino acid aminotransferase (EC 2.6.1.42)	GO:0004084,GO:0003824,GO:0008483,GO:0016740,GO:0008152,GO:0009081	2.029	0.0622	0	132
468	Ca	SS	589	STCa-22377	CATGTTACTCGTAATATATATATGTA						2.029	0.0187	34.6	263	-0.339677
469	Ca	SS	590	STCa-22400	CATGTTACTTTCAACAAGTTGTGATT						2.029	0.0187	34.6	263	0.285931
470	Ca	SS	591	STCa-22581	CATGTTATGATTATTTAATTGTGATA						2.029	0.0622	0	132
471	Ca	SS	593	STCa-22920	CATGTTCGCTGAATAAATAGTTTGTT	Q941A6_ARATH	Q941A6	0.004	At1g08480/T27G7_10	GO:5739	2.029	0.0622	0	132
33630	Ca	SS	595	STCa-22944	CATGTTCTACTGAAACTGAAAGTAGA						2.029	0.0622	0	132
473	Ca	SS	597	STCa-23115	CATGTTGAATGACACACTTATTTTTC						2.029	0.0622	0	132
33397	Ca	SS	598	STCa-23459	CATGTTGGTAGAGCTCAAGGGATGTT	Q9SS03_ARATH	Q9SS03	1e-06	F12P19.3	GO:	2.029	0.0622	0	132
37697	Ca	SS	600	STCa-23473	CATGTTGGTCTACCTTTTGGTCATAT						2.029	0.0622	0	132
476	Ca	SS	601	STCa-23785	CATGTTTAGAAAAAAAAAAAAAAAAA						2.029	0.0622	0	132
41862	Ca	SS	602	STCa-23909	CATGTTTCACTTCGATTTTGAATTCG						2.029	0.0622	0	132
10112	Ca	SS	603	STCa-24335	CATGTTTTGAATTTGATTTGGTAACT						2.029	0.0622	0	132
36162	Ca	SS	605	STCa-666	CATGAAATTATACATTGATTTGGATC						1.955	0.0273	34.6	244	0.856541
480	Ca	SS	607	STCa-3844	CATGAGTATTAGTTTCTAAGTTAAGG						1.955	0.0273	34.6	244
8111	Ca	SS	608	STCa-6427	CATGCAAGAAAGCAGTGTGCCTTGTT	Q9ZRU3_CICAR	Q9ZRU3	4e-07	Protein kinase	GO:0004672,GO:0005524,GO:0000166,GO:0004674,GO:0016301,GO:0016740,GO:0006468	1.955	0.0273	34.6	244
482	Ca	SS	609	STCa-6701	CATGCAATGTATCAATTTGAATGTTT	Q1RZ38_MEDTR	Q1RZ38	5e-07	Cyclin-like F-box; Serine/threonine protein phosphatase, BSU1	GO:	1.955	0.0273	34.6	244
12513	Ca	SS	610	STCa-9060	CATGCGATTGATCGCAAGGAAATAAT						1.955	0.000937	69.2	489
484	Ca	SS	611	STCa-10137	CATGCTGTTGAGTTCCCAATTCCTGA	Q9LEN5_CICAR	Q9LEN5	4e-07	Hypothetical protein	GO:0005215,GO:0006810,GO:0005622,GO:0016021	1.955	0.0273	34.6	244	-0.339677
30336	Ca	SS	616	STCa-20058	CATGTCTATTGTGCTTCAATTTAACC						1.955	0.0273	34.6	244
486	Ca	SS	617	STCa-20432	CATGTGAATGGATGTCTTTTAAATCT						1.955	0.0273	34.6	244
487	Ca	SS	618	STCa-23118	CATGTTGAATGATAAAATAATGTGTA						1.955	0.0273	34.6	244
7248	Ca	SS	619	STCa-23552	CATGTTGTACTATATTCAAACTATTT						1.955	0.0273	34.6	244
39746	Ca	SS	621	STCa-24398	CATGTTTTGTTACAAATTTTATGTTA						1.955	0.0273	34.6	244	1.21135
490	Ca	SS	622	STCa-81	CATGAAAAATATTAGAGAAATTGTCT	Q6K620_ORYSA	Q6K620	0.004	Leucine-rich repeat-like protein	GO:5515	1.875	0.0959	0	113
491	Ca	SS	623	STCa-122	CATGAAAACTTCGTGTACTTGTTTTT						1.875	0.0959	0	113
39756	Ca	SS	625	STCa-131	CATGAAAAGAACCACACCAGAAGTAT						1.875	0.0959	0	113
493	Ca	SS	626	STCa-176	CATGAAAATACACCTTCAGAAACTGA						1.875	0.0959	0	113
494	Ca	SS	627	STCa-220	CATGAAAATGATGATAACTATTTGTT	Q93ZE5_ARATH	Q93ZE5	0.001	AT4g15940/dl4011w (At4g15940) (Isomerase like protein)	GO:0003824,GO:0016853,GO:0008152	1.875	0.0959	0	113
41535	Ca	SS	628	STCa-230	CATGAAAATGGTGATTCTCCTTCAAC						1.875	0.0959	0	113
19623	Ca	SS	629	STCa-242	CATGAAAATTATTTACTAAAGCTGTT						1.875	0.0959	0	113
497	Ca	SS	630	STCa-247	CATGAAAATTCTTGTAATTTTGGGTT	Q93XA4_PHAVU	Q93XA4	7e-08	Homeodomain leucine zipper protein HDZ2	GO:0003677,GO:0043565,GO:0003700,GO:0045449,GO:0006355,GO:0005634	1.875	0.0959	0	113
498	Ca	SS	631	STCa-541	CATGAAATAATGTATTCTATTTTTCA						1.875	0.0959	0	113
41816	Ca	SS	632	STCa-674	CATGAAATTATTCAATAAAAAAAAAA						1.875	0.0959	0	113
500	Ca	SS	634	STCa-684	CATGAAATTGAAATAAAAAAAAAAAA						1.875	0.0959	0	113
501	Ca	SS	635	STCa-734	CATGAAATTTCTGGGAACAATTTTGG						1.875	0.0959	0	113
503	Ca	SS	636	STCa-1047	CATGAACTGTTTAGGTTTTAACAATA						1.875	0.0959	0	113
42064	Ca	SS	637	STCa-1237	CATGAAGAGGCCAGGAGAAAGAATTC	R15A1_ARATH	P42798	0.002374	40S ribosomal protein S15a-1	GO:0003735,GO:0006412,GO:0005622,GO:0005840,GO:0030529	1.875	0.0959	0	113
505	Ca	SS	638	STCa-1624	CATGAAGTTGTGGCAATTGAAGATTC						1.875	0.0959	0	113
506	Ca	SS	639	STCa-1669	CATGAATAAGTAAACCACAATGGGTC						1.875	0.0959	0	113
507	Ca	SS	640	STCa-1685	CATGAATACAAAAAAAAAAAAAAAAA						1.875	0.0959	0	113
508	Ca	SS	641	STCa-1735	CATGAATATACTCTAGGAAGCCGGCT						1.875	0.0959	0	113
509	Ca	SS	643	STCa-1806	CATGAATCATCCTGTTTGTATCATTT						1.875	0.0959	0	113
228	Ca	SS	645	STCa-2065	CATGAATTAAGTAGTAATAATGTGAA						1.875	0.0396	34.6	226
1499	Ca	SS	646	STCa-2117	CATGAATTCTATATATCTACTATTCA						1.875	0.0959	0	113
512	Ca	SS	648	STCa-2124	CATGAATTGAATCATTGTTGACTTTT	Q7X8K7_BRAJU	Q7X8K7	0.009	CTR1-like kinase kinase kinase (MAPKKK)	GO:0004672,GO:0005524,GO:0000166,GO:0004674,GO:0004713,GO:0016301,GO:0016740,GO:0006468	1.875	0.0959	0	113
24267	Ca	SS	649	STCa-2435	CATGACAGCATAACGAAGAAAAGGGA						1.875	0.0959	0	113
514	Ca	SS	651	STCa-2543	CATGACATTTTAATGTTTTTTTCCTC						1.875	0.0959	0	113
515	Ca	SS	653	STCa-2697	CATGACCTTGTAAAATTTGTCTTAAA						1.875	0.0396	34.6	226
42338	Ca	SS	654	STCa-3047	CATGAGAACCAACATACTTATATATA						1.875	0.0959	0	113
517	Ca	SS	656	STCa-3699	CATGAGGGTGGTTTCTCTATAAGGAG						1.875	0.0959	0	113
518	Ca	SS	657	STCa-3712	CATGAGGTAGGTATAATAAAAGCTAG						1.875	0.0959	0	113
14042	Ca	SS	658	STCa-3961	CATGAGTTAAAAAAAAAAAAAAAAAA						1.875	0.0959	0	113
520	Ca	SS	659	STCa-5253	CATGATGGCTGGAAATAAGTCTGATT	RB11C_LOTJA	RB11C	0.0001	Ras-related protein Rab11C	GO:0000166,GO:0005525,GO:0015031,GO:0007264,GO:0016020	1.875	0.0959	0	113
521	Ca	SS	660	STCa-5302	CATGATGGTACTGTAAATAAATATGT						1.875	0.0959	0	113
522	Ca	SS	661	STCa-5455	CATGATGTGTCAACTCGTGGTAAGAG						1.875	0.0959	0	113
42385	Ca	SS	662	STCa-5618	CATGATTATGTTGTCAAAAAAAAAAA						1.875	0.0959	0	113
524	Ca	SS	663	STCa-5635	CATGATTATTAGTTACTAGTTATAAA						1.875	0.0959	0	113
18036	Ca	SS	665	STCa-5847	CATGATTGGTTATCTTGAATTTTCTG						1.875	0.0959	0	113
526	Ca	SS	666	STCa-5900	CATGATTTACTCTTTATCGTTCAGCT	Q9SXT5_CICAR	Q9SXT5	4e-07	Rab-type small GTP-binding protein	GO:0005524,GO:0000166,GO:0008134,GO:0005525,GO:0015031,GO:0007264,GO:0006355,GO:0016020,GO:0005622	1.875	0.0959	0	113
527	Ca	SS	668	STCa-6036	CATGATTTTCTGTTATATTTGTTTAG						1.875	0.0959	0	113	1.38002
528	Ca	SS	669	STCa-6054	CATGATTTTTACTTGCTTTGCTGGTG						1.875	0.0959	0	113
529	Ca	SS	670	STCa-6265	CATGCAAATGCCACTCCTCAATCCAA						1.875	0.0959	0	113
530	Ca	SS	671	STCa-6621	CATGCAATAGACATTGCATCATTTCC	Q6ZJC7_ORYSA	Q6ZJC7	3e-07	Early nodulin 75-like protein	GO:	1.875	0.0959	0	113
531	Ca	SS	672	STCa-6622	CATGCAATAGACATTGCATCGTTTCC	Q6ZJC7_ORYSA	Q6ZJC7	7e-05	Early nodulin 75-like protein	GO:	1.875	0.0959	0	113
532	Ca	SS	674	STCa-6710	CATGCAATGTTGTGTAAACTGCACCA						1.875	0.0959	0	113
21378	Ca	SS	675	STCa-7156	CATGCACTTGTAATTGCTACTTCTAT						1.875	0.0959	0	113
534	Ca	SS	676	STCa-7179	CATGCACTTTCAGTTCAGTGTTTTAA						1.875	0.0959	0	113	0.0563803
535	Ca	SS	677	STCa-7224	CATGCAGAATATCTTTGATGATCAAC						1.875	0.0959	0	113
11721	Ca	SS	678	STCa-7276	CATGCAGATGCAGCATTTTGAAATAT	ERD2_PETHY	ERD2	0.008	ER lumen protein retaining receptor; PGP169-12; HDEL receptor	GO:0004872,GO:0046923,GO:0015031,GO:0006810,GO:0006621,GO:0006888,GO:0016020,GO:0005783,GO:0016021	1.875	0.0959	0	113
537	Ca	SS	680	STCa-7383	CATGCAGCTGAGAAATATTTTATTAA						1.875	0.0959	0	113
21691	Ca	SS	681	STCa-7595	CATGCAGTGTTTTTGTATTATTGATT						1.875	0.0959	0	113
539	Ca	SS	682	STCa-7614	CATGCAGTTCTACCATTTTAGCTGAG						1.875	0.0959	0	113
540	Ca	SS	684	STCa-7949	CATGCATTATTAAAAGTTATAAATTG						1.875	0.0959	0	113
541	Ca	SS	686	STCa-7975	CATGCATTCTGGATGATTTTGGTTTC	Q9ZVU7_ARATH	Q9ZVU7	2e-05	T5A14.10 protein	GO:	1.875	0.0959	0	113	0.364643
1573	Ca	SS	687	STCa-7987	CATGCATTGAAGCTCGTATTTGTGTA						1.875	0.0959	0	113
543	Ca	SS	689	STCa-8054	CATGCATTGTTTGTACTTTTGTTTTG						1.875	0.0959	0	113
544	Ca	SS	690	STCa-8068	CATGCATTTCAAAAAAAAAAAAAAAA						1.875	0.0959	0	113
545	Ca	SS	691	STCa-8090	CATGCATTTTAAAAAATGTTTGTAAT	Q7X6I9_ORYSA	Q7X6I9	0.0005	Leucine zipper protein-like	GO:	1.875	0.0959	0	113
546	Ca	SS	693	STCa-8449	CATGCCATTGGACAGCCCAAACATTG	SPS_VICFA	SPS	7e-06	Sucrose-phosphate synthase; UDP-glucose-fructose-phosphate glucosyltransferase	GO:0016757,GO:0016740,GO:0046524,GO:0009058,GO:0005985	1.875	0.0396	34.6	226	0.0834216
547	Ca	SS	695	STCa-8736	CATGCCTACATTGATATTATATTAAT						1.875	0.0959	0	113
548	Ca	SS	696	STCa-8758	CATGCCTATCGATTAATTCTTGGACT						1.875	0.0959	0	113
549	Ca	SS	698	STCa-8884	CATGCCTTGAGATAATTGACGAGTTT						1.875	0.0959	0	113
550	Ca	SS	699	STCa-9089	CATGCGCCATATATCGAAATGTAACT						1.875	0.0959	0	113
36847	Ca	SS	700	STCa-9191	CATGCGGCTTCTGCAGATTATGGTCC	Q9SR13_ARATH	Q9SR13	0.009382	Putative RNA-binding protein (AT3g04610/F7O18_9)	GO:0003676,GO:0003723,GO:0009911,GO:0005634	1.875	0.0959	0	113	0.375006
4834	Ca	SS	701	STCa-9246	CATGCGGTTTAGCAAATTTTCTTGTG						1.875	0.0959	0	113
553	Ca	SS	702	STCa-9390	CATGCTAAAAATGGTGTTGATATTGT						1.875	0.0959	0	113
554	Ca	SS	704	STCa-9422	CATGCTAACACCAAAGAACAGAATTG						1.875	0.0959	0	113
555	Ca	SS	705	STCa-9612	CATGCTATAGATTCCTTGATATTTTG						1.875	0.0959	0	113
556	Ca	SS	706	STCa-9666	CATGCTATTCATATAGTTTAGATATG						1.875	0.0959	0	113
35016	Ca	SS	707	STCa-9676	CATGCTATTGCTATCCAGTAGTATGT						1.875	0.0959	0	113
558	Ca	SS	708	STCa-9807	CATGCTCTAGAGAGATATGTTCAATG						1.875	0.0959	0	113
559	Ca	SS	709	STCa-9845	CATGCTCTTGAACAAGGCTTTTGGCT	Q9C6K5_ARATH	Q9C6K5	9e-06	Sm-like protein (At1g76860)	GO:0016071,GO:0030529	1.875	0.0959	0	113
561	Ca	SS	710	STCa-9882	CATGCTGAAGCACTCATCGTAAACTT						1.875	0.0959	0	113
562	Ca	SS	712	STCa-9949	CATGCTGATTCTGAGGTTATTGATTA	PH1_ARATH	Q9ST43	2e-05	Pleckstrin homology domain-containing protein 1 (AtPH1)	GO:8289	1.875	0.0959	0	113
563	Ca	SS	713	STCa-10193	CATGCTTACCTGTTTTTCTGTGTTGG						1.875	0.0959	0	113
40614	Ca	SS	714	STCa-10267	CATGCTTCAGGGAACATTCGTCAACT	Q940S9_ARATH	Q940S9	4e-05	AT3g57890/T10K17_100	GO:	1.875	0.0959	0	113
565	Ca	SS	716	STCa-10309	CATGCTTCTTATGCTATACAAATTAA						1.875	0.0959	0	113
39723	Ca	SS	717	STCa-10387	CATGCTTGTCTATCACTAAACCCATA						1.875	0.0959	0	113
567	Ca	SS	719	STCa-10497	CATGCTTTTAAAAAGAATCAAAGACT						1.875	0.0959	0	113
568	Ca	SS	720	STCa-10524	CATGCTTTTTTTGAACTTGAAGGTGT						1.875	0.0959	0	113
570	Ca	SS	721	STCa-10580	CATGGAAAATATTGCTGGTTTGATCA	Q9LM78_ARATH	Q9LM78	0.009	F2D10.25	GO:5509	1.875	0.0959	0	113
571	Ca	SS	722	STCa-10599	CATGGAAAATTTGAAAATTACGGTGT						1.875	0.0959	0	113
40422	Ca	SS	723	STCa-10838	CATGGAAGAAAATCAATTATGTGGGC						1.875	0.0959	0	113
41434	Ca	SS	724	STCa-11025	CATGGAATAGGAAAGAAAGAATAACT						1.875	0.0959	0	113
19877	Ca	SS	725	STCa-11212	CATGGACAACTGCTTTGAAATATTAG						1.875	0.0959	0	113
575	Ca	SS	726	STCa-11269	CATGGACAGATCAGTATGTACATTTG						1.875	0.0959	0	113
13111	Ca	SS	730	STCa-11736	CATGGAGAGTGATTTTAGTTTCTCCT	O49471_ARATH	O49471	0.009	TMV resistance protein N-like	GO:0005524,GO:0005515,GO:0004888,GO:0006915,GO:0006952,GO:0016020	1.875	0.0396	34.6	226
270	Ca	SS	731	STCa-12054	CATGGAGTGTTCTGGACATAAATAAA						1.875	0.0959	0	113
578	Ca	SS	732	STCa-12161	CATGGATAGTAATAAAAGAGGGAAAT						1.875	0.0959	0	113
579	Ca	SS	733	STCa-12191	CATGGATATTATTATAATGCCCTTTT						1.875	0.0959	0	113
580	Ca	SS	734	STCa-12458	CATGGATTAAAAAATTAAAAATATAA						1.875	0.0959	0	113
1070	Ca	SS	735	STCa-13000	CATGGCCAGTGAAAGAAGAAACTTAT	Q9ZQT8_TOBAC	Q9ZQT8	4e-06	WREBP-2 protein	GO:0003676,GO:0008270,GO:0046872,GO:0005622	1.875	0.0959	0	113
582	Ca	SS	736	STCa-13039	CATGGCCCATAATTTTAAATTTCTTT	Q9FKJ0_ARATH	Q9FKJ0	2e-05	Emb|CAB55405.1	GO:	1.875	0.0959	0	113	0.314081
583	Ca	SS	737	STCa-13181	CATGGCGAGCTGGATAGGAATGAATC	O35059_MOUSE	O35059	7e-05	Motor domain of KIF10 (Fragment)	GO:0003774,GO:0005524,GO:0000166,GO:0003777,GO:0008608,GO:0007018,GO:0000776,GO:0005875,GO:0005874,GO:0000775	1.875	0.0959	0	113
584	Ca	SS	738	STCa-13679	CATGGGAAGGCAGGGAGTAAGGAAAA						1.875	0.0959	0	113
585	Ca	SS	741	STCa-13693	CATGGGAAGTCAGAAGAAAACGATAC						1.875	0.0959	0	113
15111	Ca	SS	742	STCa-13732	CATGGGAATGGTATAGTTTGCAAAAG						1.875	0.0959	0	113
587	Ca	SS	743	STCa-13774	CATGGGACACTTCCTAGGTCTTTTTT						1.875	0.0959	0	113
588	Ca	SS	744	STCa-13964	CATGGGATAAGTTAACAACACAATGA						1.875	0.0959	0	113
590	Ca	SS	745	STCa-13976	CATGGGATACTTCCATTGTTATTGGT						1.875	0.0959	0	113
591	Ca	SS	747	STCa-15295	CATGGGTTTTACATTTTTTCTAATAG						1.875	0.0959	0	113
23632	Ca	SS	748	STCa-15470	CATGGTAGAACACCTTACTAATTTTG						1.875	0.0959	0	113
2108	Ca	SS	751	STCa-15530	CATGGTAGTTTTACCTTGCTATGAAT	Q9SP38_LUPLU	Q9SP38	2e-05	NADH ubiquinone oxidoreductase PSST subunit	GO:0008137,GO:0006120	1.875	0.0959	0	113
594	Ca	SS	752	STCa-15578	CATGGTATGAAGCTTCCTTCCCTTAA						1.875	0.0959	0	113
2874	Ca	SS	753	STCa-15696	CATGGTCACTATTCCCTTAAAAAAAA						1.875	0.0959	0	113
596	Ca	SS	754	STCa-15701	CATGGTCAGATACCAGTGGCTATCCT	TTP_HUMAN	P26651	2e-06	Tristetraproline (TTP) (Zinc finger protein 36 homolog) (Zfp-36) (Protein TIS11A) (TIS11) (Growth factor-inducible nuclear protein NUP475) (G0/G1 switch regulatory protein 24)	GO:0003729,GO:0003677,GO:0003676,GO:0005515,GO:0008270,GO:0003727,GO:0046872,GO:0045638,GO:0006402,GO:0050779,GO:0050728,GO:0007243,GO:0043488,GO:0005737,GO:0005829,GO:0005634	1.875	0.0959	0	113
597	Ca	SS	755	STCa-15771	CATGGTCCTATTCATTTCCGTGCTCC	R13A4_ARATH	R13A4	0.002	60S ribosomal protein L13a-4	GO:0003735,GO:0006412,GO:0005622,GO:0005840,GO:0015934,GO:0030529	1.875	0.0959	0	113	0.671924
598	Ca	SS	756	STCa-16312	CATGGTGTGGACATTGCAAAAGTCTT	PDIA6_MEDSA	PDIA6	4e-07	Probable protein disulfide-isomerase A6 precursor; P5	GO:0003756,GO:0009055,GO:0016853,GO:0015035,GO:0045454,GO:0005783	1.875	0.0959	0	113
599	Ca	SS	757	STCa-16596	CATGGTTCTTGGGGACAAGTGTGTTG	Q94F86_MEDSA	Q94F86	4e-07	Early light inducible protein	GO:	1.875	0.0959	0	113
600	Ca	SS	758	STCa-16747	CATGGTTGTTTGATTTGATCATCACT						1.875	0.0959	0	113
601	Ca	SS	760	STCa-16811	CATGGTTTGAGAGAAATGATATTATT						1.875	0.0959	0	113
700	Ca	SS	762	STCa-16861	CATGGTTTTGGGTGTTTCCTCATTTT	Q9SAW3_VICFA	Q9SAW3	0.0004	P-type H+-ATPase	GO:0003824,GO:0000287,GO:0005524,GO:0000166,GO:0016787,GO:0016887,GO:0016820,GO:0015662,GO:0046872,GO:0008152,GO:0006810,GO:0006812,GO:0015992,GO:0006811,GO:0016020,GO:0016021	1.875	0.0959	0	113
603	Ca	SS	763	STCa-16869	CATGTAAAAAAAAAAAAAAAAAAAAA						1.875	0.0959	0	113
604	Ca	SS	764	STCa-16882	CATGTAAAAAAAAAAAAAAAAACTAG						1.875	0.0959	0	113
605	Ca	SS	766	STCa-16922	CATGTAAAACTCCACCCAATATATTT						1.875	0.0959	0	113
3209	Ca	SS	768	STCa-17112	CATGTAAATGAAATCAAACATTATTT						1.875	0.0959	0	113
607	Ca	SS	770	STCa-17141	CATGTAAATTCTGTTTCTAAATTCGA	Q40372_MEDTR	Q40372	0.0003	Peroxidase precursor	GO:0005506,GO:0016491,GO:0004601,GO:0046872,GO:0006979	1.875	0.0959	0	113
608	Ca	SS	772	STCa-17524	CATGTAATGAAGATGAAATGTTTGTA						1.875	0.0959	0	113
10783	Ca	SS	774	STCa-17589	CATGTAATTAATGTAAGTTCATTTTG						1.875	0.0959	0	113
610	Ca	SS	776	STCa-17722	CATGTACAAGTTGTAAAATGTATAGT						1.875	0.0959	0	113
31366	Ca	SS	777	STCa-18179	CATGTAGAAGTTTTAATTCGAGCAGA						1.875	0.0959	0	113
4176	Ca	SS	780	STCa-18423	CATGTAGGATATGTCTGAAAGTTTAA						1.875	0.0959	0	113
613	Ca	SS	781	STCa-18427	CATGTAGGATTTATGTTTATCTTAGA						1.875	0.0959	0	113	0.79254
614	Ca	SS	784	STCa-18827	CATGTATATTGCATAACATACATCAT						1.875	0.0959	0	113
615	Ca	SS	786	STCa-18875	CATGTATCACCGTGTCCTTTCAAAAC						1.875	0.0959	0	113
616	Ca	SS	787	STCa-19182	CATGTATTAATGCTGTGGAAAAAAAT						1.875	0.0959	0	113
617	Ca	SS	788	STCa-19405	CATGTCAAAATCTCATCAAATTTATA						1.875	0.0959	0	113
618	Ca	SS	789	STCa-19506	CATGTCAATTTATTCAACTGAAGATT	Q8LLW2_ORYSA	Q8LLW2	0.004	Receptor-like kinase Xa21-binding protein 3	GO:0004872,GO:0005515,GO:0016301,GO:0008270,GO:0046872	1.875	0.0959	0	113
619	Ca	SS	790	STCa-19649	CATGTCATATTTGAATGAGCTTTTTT	VATA_CITUN	VATA	0.009	Vacuolar ATP synthase catalytic subunit A (EC 3.6.3.14) (V-ATPase subunit A) (Vacuolar proton pump subunit alpha) (V-ATPase 69 kDa subunit)	GO:0015078,GO:0046933,GO:0005524,GO:0000166,GO:0046961,GO:0016787,GO:0046872,GO:0006754,GO:0006810,GO:0015986,GO:0015992,GO:0006811,GO:0016469	1.875	0.0959	0	113
620	Ca	SS	792	STCa-19837	CATGTCCGGGCTGTTTTAGTGTGTCT	Q8SBC3_ARATH	Q8SBC3	9e-05	Protein phosphatase 2C (Fragment) (PP2C)	GO:3824	1.875	0.0959	0	113
20119	Ca	SS	793	STCa-20211	CATGTCTTGCACTTTACAAATTAAAT						1.875	0.0959	0	113
622	Ca	SS	794	STCa-20267	CATGTCTTTTTGTACCTAAATTGTAA						1.875	0.0959	0	113
23306	Ca	SS	795	STCa-20335	CATGTGAACATATTCCTAGATGAGTT						1.875	0.0959	0	113
13341	Ca	SS	796	STCa-20408	CATGTGAATATTGTTAGTTCTTGGGA	Q8RY59_ARATH	Q8RY59	0.004	At1g32230/F3C3_1 (Radical-induced cell death 1-1)	GO:0003950,GO:0006471,GO:0005634	1.875	0.0959	0	113
625	Ca	SS	797	STCa-20712	CATGTGATTCAGTGAATCACATTTCT	RL18A_CASSA	Q9ATF5	1e-06	60S ribosomal protein L18a	GO:0003735,GO:0006412,GO:0005622,GO:0005840,GO:0030529	1.875	0.0396	34.6	226
626	Ca	SS	801	STCa-20764	CATGTGCAATTTTCTCTAGAGTTATT						1.875	0.0959	0	113	0.244514
4087	Ca	SS	802	STCa-20797	CATGTGCAGGATTGAATTTGAGCAGA						1.875	0.0959	0	113
628	Ca	SS	803	STCa-20833	CATGTGCATTTTATTTATTTATCAAG						1.875	0.0959	0	113	0.664748
18350	Ca	SS	804	STCa-20943	CATGTGCTTAGATTGTATTCGAGCAG						1.875	0.0959	0	113
19198	Ca	SS	805	STCa-20960	CATGTGCTTTACGATTATATTGTTTT						1.875	0.0959	0	113
631	Ca	SS	806	STCa-21649	CATGTGTCAGGGAGGTGACTTCGAGC	Q708X2_CICAR	Q708X2	0.0001	Cyclophilin-type peptidyl-prolyl cis-trans isomerase	GO:0003755,GO:0016853,GO:0006457	1.875	0.0959	0	113
632	Ca	SS	810	STCa-21673	CATGTGTCCTTCACTTTAATATATTC						1.875	0.0959	0	113
9392	Ca	SS	811	STCa-21729	CATGTGTGACCTGTTTATTTCTGTTG						1.875	0.0959	0	113
634	Ca	SS	812	STCa-21846	CATGTGTGTATATATATTTATTGTCA						1.875	0.0959	0	113
43456	Ca	SS	814	STCa-22427	CATGTTAGCTTTGTAGTTTATGATAG	Q6T7D1_GOSBA	Q6T7D1	0.004	Fiber protein Fb19 (Fragment)	GO:6950	1.875	0.0959	0	113	0.440189
636	Ca	SS	815	STCa-22624	CATGTTATGTTATGCTAAATATAATA						1.875	0.0959	0	113	0.416075
9477	Ca	SS	816	STCa-22966	CATGTTCTCAATCTGTCCAAGGGGTT						1.875	0.0959	0	113
638	Ca	SS	817	STCa-23384	CATGTTGGACAGCTCAAAAAAAAAAA						1.875	0.0959	0	113
639	Ca	SS	818	STCa-23440	CATGTTGGGAGCATTCATTTGTATAA						1.875	0.0959	0	113
640	Ca	SS	819	STCa-23445	CATGTTGGGCCACAGTGTTTTGAAAA						1.875	0.0959	0	113
16249	Ca	SS	820	STCa-23493	CATGTTGGTGCGACAGAACGTAAGCT						1.875	0.0959	0	113
642	Ca	SS	821	STCa-23551	CATGTTGTACTAGATTATGAAGTTTG						1.875	0.0959	0	113
643	Ca	SS	822	STCa-23894	CATGTTTCAAATTAGTAATCTTTTGG						1.875	0.0959	0	113	0.220741
644	Ca	SS	823	STCa-23953	CATGTTTCGTGTGAGAGAAATTTACG	Q43709_SOYBN	Q43709	0.007	Soybean Bowman-Birk proteinase isoinhibitor D-II precursor	GO:0004867,GO:0004866,GO:0005576	1.875	0.0959	0	113
29648	Ca	SS	825	STCa-23985	CATGTTTCTTTGGTAATGGTACTTTT						1.875	0.0396	34.6	226
12649	Ca	SS	826	STCa-24040	CATGTTTGATGATTAGACTAGTTTCT						1.875	0.0396	34.6	226
647	Ca	SS	827	STCa-24200	CATGTTTGTTACCCATTTTCTATTTT						1.875	0.0959	0	113
648	Ca	SS	830	STCa-24304	CATGTTTTCCTCAAAAAAAAAAAAAA						1.875	0.0959	0	113
6009	Ca	SS	831	STCa-24308	CATGTTTTCGCGGATTTGTGATTGAA	Q8LP44_AVIMR	Q8LP44	0.009382	Betaine/proline transporter	GO:	1.875	0.0959	0	113	-1.96611
650	Ca	SS	834	STCa-16125	CATGGTGGATCAATAAGATAGTTTAT						1.847	0.000153	104	658	0.418052
651	Ca	SS	835	STCa-7686	CATGCATACAAGACCTTAAATGTTTA						1.841	7.38e-07	173	1090	0.500775
652	Ca	SS	836	STCa-21976	CATGTGTTATTATTATTATTATTATC						1.832	0.0028	69.2	432
653	Ca	SS	839	STCa-24098	CATGTTTGGAAGAATAAGAGTACTAT						1.832	1.25e-05	138	865
654	Ca	SS	841	STCa-22168	CATGTTAAATATTTAGTCTTCTATGT	CHIA_CICAR	CHIA	0.007	Acidic endochitinase precursor	GO:0003824,GO:0004553,GO:0016787,GO:0004568,GO:0043169,GO:0016798,GO:0006032,GO:0008152,GO:0005975,GO:0000272	1.818	0.000219	104	639
655	Ca	SS	843	STCa-572	CATGAAATATTATACAGCACTCTTTG						1.788	0.00401	69.2	414
656	Ca	SS	844	STCa-6387	CATGCAACTCAAGCAGGAAATTTAAC	Q8H934_VICFA	Q8H934	0.002	Phototropin	GO:0004672,GO:0004871,GO:0000155,GO:0005524,GO:0004674,GO:0007165,GO:0006468,GO:0006355,GO:0000160	1.788	0.000312	104	620
30543	Ca	SS	845	STCa-8980	CATGCGAATTAATCCTAATACAGGTG						1.788	0.0573	34.6	207
658	Ca	SS	846	STCa-11183	CATGGAATTTTAAGAATGGCAATGAT						1.788	0.0573	34.6	207
25587	Ca	SS	847	STCa-12270	CATGGATCTCACCTTTAGCAAATCCA						1.788	0.0573	34.6	207
660	Ca	SS	848	STCa-17902	CATGTACCATCATTTTAAAATAAAAT	Q9ZRV7_CICAR	Q9ZRV7	4e-07	Chalcone synthase	GO:0016747,GO:0016210,GO:0016740,GO:0008415,GO:0009058	1.788	0.00401	69.2	414
661	Ca	SS	850	STCa-18884	CATGTATCATAAAGTGAATACATAGC						1.788	0.0573	34.6	207
662	Ca	SS	851	STCa-19000	CATGTATGATATTGATAGCAACAAAT						1.788	0.0573	34.6	207
663	Ca	SS	852	STCa-19157	CATGTATGTTTATTAGAATTAGAGCA	Q9ZQ26_ARATH	Q9ZQ26	0.004	Expressed protein (At2g24420/T28I24.15)	GO:	1.788	0.0573	34.6	207
664	Ca	SS	854	STCa-21852	CATGTGTGTGAATTGGAATGTGATTT	Q8L5L1_MUSAC	Q8L5L1	0.004	Protein phosphatase 2AB regulatory subunit-like protein (Fragment)	GO:	1.788	0.0573	34.6	207	0.335043
665	Ca	SS	855	STCa-22386	CATGTTACTTAAGCTGTTTGTTTACT	Q8GTE2_CICAR	Q8GTE2	7e-06	Ribosomal protein RL5	GO:0003735,GO:0006412,GO:0005622,GO:0005840,GO:0030529	1.788	0.0573	34.6	207
19994	Ca	SS	856	STCa-15852	CATGGTCTTACTAGATCAATCCATCT						1.741	0.00574	69.2	395	0.308954
667	Ca	SS	857	STCa-21993	CATGTGTTCGTATTAATGATTTATGA						1.725	0.000633	104	583	0.930194
36898	Ca	SS	858	STCa-41	CATGAAAAAAGGACTGAAGAGATACT						1.692	0.148	0	94
669	Ca	SS	860	STCa-70	CATGAAAAAGGTTGTTGTACAAATTG						1.692	0.148	0	94
670	Ca	SS	861	STCa-182	CATGAAAATATAATGACGTATTAATC						1.692	0.148	0	94
671	Ca	SS	866	STCa-232	CATGAAAATGTAGATATCATATTCCT						1.692	0.148	0	94
673	Ca	SS	868	STCa-322	CATGAAACGCTGTTTTGCTGATGATG						1.692	0.148	0	94
674	Ca	SS	869	STCa-493	CATGAAAGGTCACTAAAGTTATTTGG						1.692	0.148	0	94
675	Ca	SS	870	STCa-531	CATGAAATAAATGGTATTGATGTGTG						1.692	0.148	0	94
676	Ca	SS	871	STCa-639	CATGAAATGTATGGAAGAGATGATGA						1.692	0.148	0	94
16429	Ca	SS	873	STCa-722	CATGAAATTGTATAATTTTATGAGTA	Q9FJD4_ARATH	Q9FJD4	0.004	Importin beta	GO:0005488,GO:0008565,GO:0006886,GO:0000059,GO:0005737,GO:0005643,GO:0005634	1.692	0.148	0	94
678	Ca	SS	874	STCa-768	CATGAACAAATAAAATAATTAATGAG						1.692	0.148	0	94
27439	Ca	SS	875	STCa-803	CATGAACAAGCAACTAAATAAACAAA						1.692	0.148	0	94
680	Ca	SS	878	STCa-882	CATGAACATTTGGTAATTTTGGTTGG						1.692	0.148	0	94
681	Ca	SS	879	STCa-940	CATGAACCTTGAGATGTCCAGCAAAT	Q84VA4_ORYSA	Q84VA4	0.009	DNAJ-like protein (Fragment)	GO:	1.692	0.148	0	94
682	Ca	SS	880	STCa-1022	CATGAACTCATTGTTATGTAATGTGC						1.692	0.148	0	94
11665	Ca	SS	881	STCa-1174	CATGAAGAATATGATTTTTGTTTTGT	Q9FJ27_ARATH	Q9FJ27	0.0001	Polygalacturonase-like protein; At5g41870	GO:0004650,GO:0005975	1.692	0.148	0	94
684	Ca	SS	882	STCa-1304	CATGAAGATTATTTTTGTTTTACAAG						1.692	0.148	0	94
685	Ca	SS	883	STCa-1382	CATGAAGCTCAGTTGAGTTTAGAGAT	Q8GSD7_ARATH	Q8GSD7	0.009	MRNA capping enzyme-like protein	GO:0004484,GO:0004721,GO:0008138,GO:0006397,GO:0006370,GO:0006470	1.692	0.148	0	94
686	Ca	SS	885	STCa-1387	CATGAAGCTGGACTTTTCTTTACCGT						1.692	0.148	0	94
687	Ca	SS	886	STCa-1438	CATGAAGGAGAAGAAATTAACTGTGG						1.692	0.148	0	94
16728	Ca	SS	887	STCa-1655	CATGAATAAATTAATAATAATAATAA						1.692	0.148	0	94
12291	Ca	SS	888	STCa-1809	CATGAATCCAAAAGGGCGTTAAGGTT	Q9SCZ4_ARATH	Q9SCZ4	2e-05	Receptor-protein kinase-like protein (RLK)	GO:0004672,GO:0005524,GO:0000166,GO:0004872,GO:0004674,GO:0004713,GO:0016301,GO:0016740,GO:0006468	1.692	0.148	0	94
16918	Ca	SS	891	STCa-1829	CATGAATCTAACATATTTAAAATTCC	Q9M447_CICAR	Q9M447	4e-07	Hypothetical protein	GO:	1.692	0.148	0	94
691	Ca	SS	893	STCa-1913	CATGAATGATGAATGAAATTTGATTT						1.692	0.148	0	94
692	Ca	SS	896	STCa-1939	CATGAATGCTATACTCTGTTTAAAAC						1.692	0.148	0	94
693	Ca	SS	897	STCa-2041	CATGAATGTGTTTAATGGATTTTCCA	RSSA_CICAR	RSSA	4e-07	40S ribosomal protein SA; p40	GO:0003735,GO:0006412,GO:0015935,GO:0005622,GO:0005840,GO:0030529	1.692	0.148	0	94
694	Ca	SS	898	STCa-2042	CATGAATGTTCAGCTAAGATTTTAAT						1.692	0.148	0	94
12406	Ca	SS	901	STCa-2067	CATGAATTAATCACGTTTTGTTGTAC						1.692	0.148	0	94
25113	Ca	SS	902	STCa-2135	CATGAATTGCCATAAAAAAACATTTG						1.692	0.148	0	94
697	Ca	SS	903	STCa-2154	CATGAATTGTTTATTATGAAGTTAGA	Q9FT00_CICAR	Q9FT00	4e-07	Cytosolic malate dehydrogenase	GO:0016615,GO:0016491,GO:0004459,GO:0030060,GO:0006096,GO:0006100,GO:0006108	1.692	0.148	0	94
698	Ca	SS	904	STCa-2212	CATGAATTTTTAAAATTTTGTGGCGT						1.692	0.148	0	94
14157	Ca	SS	905	STCa-2238	CATGACAAAATTGACTTTGTCCATTC						1.692	0.148	0	94
18658	Ca	SS	906	STCa-2336	CATGACAATCTTTTTCCTTTGGGAAG	O22512_SOYBN	O22512	7e-05	Grr1	GO:	1.692	0.148	0	94
25516	Ca	SS	908	STCa-2408	CATGACAGAACATTGAAGTGTGTCTT						1.692	0.148	0	94
702	Ca	SS	910	STCa-2447	CATGACAGGACTCGAGGAAGAAGCCC	Q2QUF6_ORYSA	Q2QUF6	4e-07	Isoflavone reductase, putative, expressed (Hypothetical protein) (Os12g0265100 protein)	GO:0016564,GO:0006808	1.692	0.148	0	94
703	Ca	SS	912	STCa-2548	CATGACCAAAAAAAAAGACTTAACCT						1.692	0.148	0	94
704	Ca	SS	913	STCa-2677	CATGACCTCACATCTATTCAAACTAA						1.692	0.148	0	94
20197	Ca	SS	914	STCa-2870	CATGACTCTTCAAATTCTACTTTCTT						1.692	0.148	0	94
706	Ca	SS	916	STCa-2903	CATGACTGGCATAAAATTTGCAATGA						1.692	0.148	0	94
707	Ca	SS	918	STCa-2906	CATGACTGGCATAGATAGTAATAAAT						1.692	0.0824	34.6	188	-0.711311
29865	Ca	SS	920	STCa-2996	CATGAGAAAAATAGTAGAGTTATTGG						1.692	0.148	0	94
9616	Ca	SS	921	STCa-3024	CATGAGAAAGGAAGTGATTAAACTTT						1.692	0.148	0	94
35645	Ca	SS	923	STCa-3184	CATGAGAGATTCACAAAGGAGTTCGG	Q9SEA8_MESCR	Q9SEA8	7e-08	Salt-induced AAA-Type ATPase	GO:0005524,GO:0000166,GO:0017111	1.692	0.148	0	94
5911	Ca	SS	924	STCa-3204	CATGAGAGGTTGTGAAACCACTTAAG						1.692	0.148	0	94
8588	Ca	SS	927	STCa-3224	CATGAGATAAGCTTAGATTTTATTAT						1.692	0.0824	34.6	188	1.00247
32045	Ca	SS	928	STCa-3619	CATGAGGCCATTCAACGGCTTGAAGA	Q9STA6_LYCES	Q9STA6	0.0003	RAD23 protein	GO:0006289,GO:0006512,GO:0006464,GO:0006974,GO:0006281,GO:0005634	1.692	0.148	0	94
22669	Ca	SS	929	STCa-4201	CATGATAATTGTATTTCTTTTTATTG						1.692	0.148	0	94
15017	Ca	SS	930	STCa-4280	CATGATAGAACTCTATACACTTTGAT						1.692	0.148	0	94
14213	Ca	SS	931	STCa-4480	CATGATATTAGTAATAGTACACTTGT						1.692	0.148	0	94
26250	Ca	SS	932	STCa-4786	CATGATCTTTTGGATGTAATATATAG						1.692	0.148	0	94
10638	Ca	SS	934	STCa-4798	CATGATGAAAGTGAAGATGCACCAGC	Q43819_PEA	Q43819	0.002	ADP-glucose pyrophosphorylase precursor	GO:0008878,GO:0016740,GO:0016779,GO:0008415,GO:0009058,GO:0005978,GO:0019252,GO:0009507	1.692	0.148	0	94
719	Ca	SS	935	STCa-5127	CATGATGCCCTGCTTCGTTTGGTTTT						1.692	0.148	0	94
720	Ca	SS	937	STCa-5318	CATGATGGTGCAATGAAAGTTTTTTT						1.692	0.148	0	94
721	Ca	SS	938	STCa-5447	CATGATGTGGTAGATAGGAGGGTGTT	Q700A6_CICAR	Q700A6	4e-07	Putative lipid transfer protein GPI-anchored	GO:0008289,GO:0006869	1.692	0.148	0	94
42919	Ca	SS	939	STCa-5562	CATGATTACAATGTTTGTTTCTTATT						1.692	0.148	0	94
26764	Ca	SS	940	STCa-5577	CATGATTAGAAGGACGGTGGCTGGGA						1.692	0.148	0	94
724	Ca	SS	941	STCa-5832	CATGATTGGTAGACTCTCAAACACAA						1.692	0.0824	34.6	188
27434	Ca	SS	942	STCa-5860	CATGATTGTCGCTATTTCAAATAGCT	O65760_CICAR	O65760	0.004	Extensin (Fragment)	GO:0005199,GO:0009664	1.692	0.148	0	94
726	Ca	SS	944	STCa-5880	CATGATTGTTTCTTTCAAAAATAACA						1.692	0.148	0	94
727	Ca	SS	945	STCa-6080	CATGCAAAAAAATTAGTCGATTGTAC						1.692	0.148	0	94
728	Ca	SS	947	STCa-6282	CATGCAAATTGGCATCCAATATAAAT						1.692	0.0824	34.6	188
729	Ca	SS	948	STCa-6285	CATGCAAATTTGGCATTGTGATAGAT						1.692	0.148	0	94
28029	Ca	SS	950	STCa-6566	CATGCAAGTTATTATTGGAAGTGTTT						1.692	0.148	0	94
28591	Ca	SS	952	STCa-6636	CATGCAATAGTTTTCAAGGTTAGGTG	Q69WX7_ORYSA	Q69WX7	0.008	Basic helix-loop-helix protein-like	GO:	1.692	0.148	0	94
733	Ca	SS	954	STCa-6699	CATGCAATGTAATGCAGAATATAAAG						1.692	0.148	0	94
734	Ca	SS	955	STCa-6758	CATGCAATTGTTTTTAACTTTGGGTT						1.692	0.148	0	94
735	Ca	SS	956	STCa-6772	CATGCAATTTCTTGAATAGAGTTGTT						1.692	0.0824	34.6	188	0.586675
736	Ca	SS	957	STCa-6845	CATGCACACCATCAAAAGGTCGAAAT						1.692	0.148	0	94
737	Ca	SS	958	STCa-7045	CATGCACGCATTTATTATATCAGAAA	Q75KP4_ORYSA	Q75KP4	0.002	Expressed protein (With alternative splicing)	GO:0030528,GO:0045449,GO:0005634	1.692	0.148	0	94
11242	Ca	SS	960	STCa-7100	CATGCACTATCAGTGTAAACGGTTTT						1.692	0.148	0	94
739	Ca	SS	961	STCa-7113	CATGCACTCTCTCATATGAGATTATT						1.692	0.148	0	94
740	Ca	SS	967	STCa-7345	CATGCAGCATTCGTTCTTTTCTTTAA						1.692	0.0824	34.6	188
741	Ca	SS	971	STCa-7589	CATGCAGTGTGTAGTATTTTGGGTTG						1.692	0.148	0	94
742	Ca	SS	972	STCa-7590	CATGCAGTGTTATTTTTAATAGAAAT						1.692	0.148	0	94
19369	Ca	SS	973	STCa-7681	CATGCATAATTGTGCATTGTAAAGTT						1.692	0.148	0	94
744	Ca	SS	974	STCa-7697	CATGCATACATTGCATCAAAAAAAAA						1.692	0.148	0	94
745	Ca	SS	975	STCa-7835	CATGCATCAAAATTCTGCTTAATAGA						1.692	0.148	0	94
746	Ca	SS	977	STCa-7946	CATGCATTATGGATTGAAGATCTTTT						1.692	0.148	0	94
747	Ca	SS	981	STCa-7996	CATGCATTGCCACTTAGGGTTGATAT						1.692	0.148	0	94
748	Ca	SS	982	STCa-7998	CATGCATTGCTATAATAAGTTATTGT						1.692	0.148	0	94
749	Ca	SS	985	STCa-8099	CATGCATTTTGGAGTTTTTGTATTTT	Q70E74_CICAR	Q70E74	4e-07	Acyl carrier protein 1	GO:0000036,GO:0031177,GO:0048037,GO:0008610,GO:0006633	1.692	0.148	0	94
750	Ca	SS	986	STCa-8141	CATGCCAAAGCTTACTTAGTTTTGAT						1.692	0.148	0	94
751	Ca	SS	987	STCa-8275	CATGCCAATGTATAAGAAGATGATGG	Q8L570_ORYSA	Q8L570	5e-05	Lipase class 3-like protein (Os01g0309900 protein) (OJ1116_C07.9 protein)	GO:0004806,GO:0006629	1.692	0.148	0	94
752	Ca	SS	988	STCa-8394	CATGCCAGTTCAAAAATAATGCTATG						1.692	0.148	0	94
33874	Ca	SS	989	STCa-8442	CATGCCATTCATCATCTTTTTTTCCT						1.692	0.148	0	94
754	Ca	SS	990	STCa-8448	CATGCCATTGCCACAAACACTCAAAT						1.692	0.148	0	94
755	Ca	SS	991	STCa-8622	CATGCCCTTGTGTAGAGCAACACTGT						1.692	0.0824	34.6	188
756	Ca	SS	992	STCa-8626	CATGCCGAAACTTCGAATTTAAGGTT						1.692	0.148	0	94
29199	Ca	SS	994	STCa-8759	CATGCCTATGAGCAAATGGTAGTGAA						1.692	0.148	0	94
35307	Ca	SS	996	STCa-8895	CATGCCTTTAATTATGAGCTCGAATT						1.692	0.148	0	94
44040	Ca	SS	997	STCa-9260	CATGCGTATCCTTTTTTACCAGATAT						1.692	0.148	0	94
31243	Ca	SS	998	STCa-9293	CATGCGTCGATTTATAGACTGTATAG						1.692	0.148	0	94
761	Ca	SS	999	STCa-9382	CATGCGTTTGTGCTTGCCTCTGTTCA	O65748_CICAR	O65748	4e-07	Acyl-coA synthetase	GO:0003824,GO:0016874,GO:0004467,GO:0008152	1.692	0.148	0	94
762	Ca	SS	1000	STCa-9388	CATGCTAAAAAAGGGTACTTGCTGGT						1.692	0.148	0	94
763	Ca	SS	1001	STCa-9421	CATGCTAACACCAAAGAACAGAATTC						1.692	0.148	0	94
31701	Ca	SS	1002	STCa-9431	CATGCTAACTATTTGGGTTGGATCCT						1.692	0.148	0	94
765	Ca	SS	1004	STCa-9531	CATGCTACTTTTTCAAATAAGGATGT						1.692	0.148	0	94
766	Ca	SS	1005	STCa-9535	CATGCTAGAAGAAAGATTGAAGAAAG						1.692	0.148	0	94
767	Ca	SS	1006	STCa-9545	CATGCTAGAGGCCTTGTTGAATGAAA						1.692	0.148	0	94
768	Ca	SS	1007	STCa-9590	CATGCTAGTGTTAATCAAAGTTGCTC						1.692	0.148	0	94
769	Ca	SS	1009	STCa-9621	CATGCTATCAAGAGGTGCAAGCAAAT	Q00508_CANMA	Q00508	2e-06	Ribosomal protein L41	GO:0003735,GO:0006412,GO:0005622,GO:0005840,GO:0030529	1.692	0.148	0	94
38695	Ca	SS	1010	STCa-9777	CATGCTCGAATTTATTACCAAGCGTG	O23247_ARATH	O23247	0.004	Arginyl-tRNA synthetase (EC 6.1.1.19)	GO:0004812,GO:0005524,GO:0016874,GO:0004814,GO:0006418,GO:0006420,GO:0009793,GO:0005739,GO:0009507	1.692	0.148	0	94
771	Ca	SS	1011	STCa-9821	CATGCTCTCCCAACAGCCACCAGTTC	Q9SFE9_ARATH	Q9SFE9	1e-06	T26F17.9 (Glucose-6-phosphate/phosphate translocator-like protein) (GONST5 Golgi Nucleotide sugar transporter)	GO:0005351,GO:0016020	1.692	0.0824	34.6	188
772	Ca	SS	1013	STCa-9881	CATGCTGAAGCACTCATCGTAAACTG						1.692	0.148	0	94
773	Ca	SS	1014	STCa-9884	CATGCTGAAGCTTTCGAACACTGTAT						1.692	0.148	0	94
40905	Ca	SS	1015	STCa-9991	CATGCTGCTACAGTTAATCACAGTGT						1.692	0.148	0	94
31817	Ca	SS	1016	STCa-10144	CATGCTGTTTCGAGAAAATACACTTT	Q93ZM6_ARATH	Q93ZM6	0.004	AT5g63620/MBK5_9	GO:0016491,GO:0008270	1.692	0.148	0	94
31830	Ca	SS	1017	STCa-10147	CATGCTGTTTCTGTTCTCCTTTAATT						1.692	0.148	0	94
777	Ca	SS	1019	STCa-10278	CATGCTTCCCCAAGTTGACAAGGATA						1.692	0.148	0	94
778	Ca	SS	1021	STCa-10313	CATGCTTCTTGGAATAGTTTATCACC	Q9ZWQ4_VIGMU	Q9ZWQ4	7e-08	UDP-glycose:flavonoid glycosyltransferase (Fragment)	GO:0016758,GO:0016757,GO:0016740,GO:0008152	1.692	0.0824	34.6	188
779	Ca	SS	1022	STCa-10341	CATGCTTGCTTCGGCAAATGACAGTT						1.692	0.148	0	94
780	Ca	SS	1023	STCa-10345	CATGCTTGGACTCCTCTAACTTGGAT	Q8VYH1_ARATH	Q8VYH1	2e-05	AT5g65000/MXK3_23	GO:0005351,GO:0008643,GO:0000139,GO:0016021	1.692	0.148	0	94
1578	Ca	SS	1024	STCa-10355	CATGCTTGGGAATCATTTGTATCTGA						1.692	0.148	0	94
10950	Ca	SS	1025	STCa-10370	CATGCTTGGTTGGCACACTAGGCCTT	GAIP_CUCMA	GAIP	3e-07	DELLA protein GAIP (Gibberellic acid-insensitive phloem protein) (GAIP) (CmGAIP)	GO:0006350,GO:0006355,GO:0009740,GO:0005634	1.692	0.148	0	94
783	Ca	SS	1026	STCa-10412	CATGCTTGTTTGATTTCACTTCTAAC						1.692	0.148	0	94
784	Ca	SS	1027	STCa-10514	CATGCTTTTGGAACATTCGTTGCATT						1.692	0.148	0	94
785	Ca	SS	1029	STCa-10519	CATGCTTTTTACATACATATACGGGG						1.692	0.148	0	94
786	Ca	SS	1030	STCa-10528	CATGGAAAAAAAAAAAAAAAAAAAAC						1.692	0.148	0	94
787	Ca	SS	1031	STCa-10672	CATGGAAAGTGTGGACCTGAAATTGA	Q9ZQX1_CICAR	Q9ZQX1	4e-07	Ribonuclease T2	GO:0004521,GO:0016787,GO:0003723	1.692	0.148	0	94
31930	Ca	SS	1032	STCa-10674	CATGGAAAGTTTCCATCTAACCTAAT						1.692	0.148	0	94
789	Ca	SS	1034	STCa-10718	CATGGAAATGTTGCATTGTGCTTGGT	Q9ZRW3_CICAR	Q9ZRW3	4e-07	Hypothetical protein	GO:8270	1.692	0.148	0	94
1296	Ca	SS	1035	STCa-10724	CATGGAAATTATTATGTGTAGATTAT						1.692	0.148	0	94
791	Ca	SS	1036	STCa-10748	CATGGAACAAGTGTCAAGCATTGAAC						1.692	0.148	0	94
792	Ca	SS	1039	STCa-10814	CATGGAACTCCTTCTGCTACTATTCA	Q8GUU3_ARATH	Q8GUU3	0.009	FEG protein	GO:16787	1.692	0.148	0	94
32132	Ca	SS	1040	STCa-10922	CATGGAAGCTCTGGAGATCAATGGAG						1.692	0.148	0	94
794	Ca	SS	1041	STCa-11030	CATGGAATAGTGAATTCAATTTTTAC						1.692	0.148	0	94
795	Ca	SS	1042	STCa-11102	CATGGAATGCGTTACTAATTAAGTGA						1.692	0.0824	34.6	188	1.45652
796	Ca	SS	1046	STCa-11152	CATGGAATTGAAGTGGCTGTGGAGTT						1.692	0.148	0	94
797	Ca	SS	1047	STCa-11164	CATGGAATTGTAGATAACTGTTTGTG	Q9SMJ8_CICAR	Q9SMJ8	0.0001	Putative water channel protein	GO:0005215,GO:0006810,GO:0016020,GO:0016021	1.692	0.148	0	94
798	Ca	SS	1048	STCa-11197	CATGGACAAAAAAGTTTTCCCCGAGT						1.692	0.148	0	94
799	Ca	SS	1049	STCa-11640	CATGGACTTTGTTTATTGGTAAATCT						1.692	0.148	0	94
800	Ca	SS	1052	STCa-11652	CATGGAGAAACTCCAGAGGAAGAAGG	RS8_PRUAR	O81361	2e-05	40S ribosomal protein S8	GO:0005622,GO:0030529	1.692	0.148	0	94
801	Ca	SS	1054	STCa-11693	CATGGAGACAGATTGGGGTACTTGTA	Q94AX9_ARATH	Q94AX9	2e-05	At1g72650/F28P22_16 (MYB transcription factor) (MYB-TF)	GO:0003677,GO:0046686,GO:0009651,GO:0006350,GO:0045449,GO:0006355,GO:0005634	1.692	0.148	0	94
802	Ca	SS	1055	STCa-11915	CATGGAGGATATCAGATTCGAGCAGA						1.692	0.148	0	94
803	Ca	SS	1056	STCa-11982	CATGGAGGTGTTGTTGGAGATGATGT						1.692	0.148	0	94
32135	Ca	SS	1057	STCa-12042	CATGGAGTGATTTTGTAGAAACTTAT						1.692	0.00817	69.2	376	0.832474
32709	Ca	SS	1058	STCa-12067	CATGGAGTTCTATATTGTAATTTCAC						1.692	0.148	0	94
806	Ca	SS	1059	STCa-12076	CATGGAGTTGTGAAACCAAGTTTATG						1.692	0.148	0	94
33466	Ca	SS	1060	STCa-12084	CATGGAGTTTGAATTCGAGCAGAAAT						1.692	0.148	0	94
32467	Ca	SS	1062	STCa-12125	CATGGATAATCAAGTTTCAAATAACA						1.692	0.148	0	94
809	Ca	SS	1063	STCa-12229	CATGGATCATAGAACAAAATGCAATC						1.692	0.148	0	94
810	Ca	SS	1065	STCa-12441	CATGGATGTTGTGGTTGAATTCGAGC						1.692	0.148	0	94	0.34359
811	Ca	SS	1066	STCa-12483	CATGGATTATTTTCCTTGCCTCATCC						1.692	0.148	0	94
812	Ca	SS	1067	STCa-12513	CATGGATTGATTTTTGTGCCCATTGG	Q8L5Q7_CICAR	Q8L5Q7	4e-07	Putative quinone oxidoreductase	GO:0016491,GO:0010181,GO:0003960	1.692	0.148	0	94
813	Ca	SS	1068	STCa-12543	CATGGATTTATATGTTTTATTACTGT						1.692	0.148	0	94	0.173953
814	Ca	SS	1069	STCa-12568	CATGGATTTTACTACTTGTTGGTGTT						1.692	0.148	0	94
29625	Ca	SS	1070	STCa-12870	CATGGCATTCAAAATGTTTTGTTAAG						1.692	0.148	0	94
42711	Ca	SS	1071	STCa-13373	CATGGCTAGTGAATTAGTGATTTTCA						1.692	0.148	0	94
28255	Ca	SS	1072	STCa-13433	CATGGCTCTTTTAACATATAGTGTGA						1.692	0.148	0	94
818	Ca	SS	1073	STCa-13497	CATGGCTTAATTTTGTAATTGTAACA	O82193_ARATH	O82193	0.002374	Expressed protein	GO:	1.692	0.148	0	94	1.45489
819	Ca	SS	1074	STCa-13722	CATGGGAATGAATTTTGCTTCTGGCT						1.692	0.148	0	94
33754	Ca	SS	1075	STCa-13847	CATGGGAGATAACAGGACCCTGCGCC						1.692	0.148	0	94
33828	Ca	SS	1076	STCa-14049	CATGGGATTATCAGTTAAGCCTTTTT	Q6NKW1_ARATH	Q6NKW1	0.001	At1g56230	GO:	1.692	0.148	0	94
34029	Ca	SS	1078	STCa-14388	CATGGGCTGTTTTATTTTATAACTCC						1.692	0.148	0	94
823	Ca	SS	1079	STCa-14771	CATGGGGGACGTTTGCAAGAAAGAGA						1.692	0.148	0	94
824	Ca	SS	1081	STCa-14836	CATGGGGGTTGGGGATTTTTAAGGAT						1.692	0.148	0	94
826	Ca	SS	1083	STCa-14871	CATGGGGTCCATAAATTGTTGATAAA						1.692	0.148	0	94
31367	Ca	SS	1084	STCa-14883	CATGGGGTGATTGAAAACTAGGGTAA						1.692	0.148	0	94
828	Ca	SS	1086	STCa-14921	CATGGGGTTTGAGAAAAGCTAAGGTT						1.692	0.148	0	94
829	Ca	SS	1087	STCa-15041	CATGGGTGAGCGTTTGTATTATATCA						1.692	0.148	0	94
830	Ca	SS	1089	STCa-15091	CATGGGTGGCTGGAGCATTATGAATT	Q9FN50_ARATH	Q9FN50	2e-05	Emb|CAB62636.1 (Cell growth defect factor) (At5g23040/MYJ24_3)	GO:	1.692	0.148	0	94
41529	Ca	SS	1092	STCa-15517	CATGGTAGTTCATCATAATGTTAATG	O04219_CICAR	O04219	4e-07	Legumin	GO:45735	1.692	0.0824	34.6	188	0.560758
832	Ca	SS	1093	STCa-15566	CATGGTATATGGGAATTTTGAGTTGT						1.692	0.148	0	94
833	Ca	SS	1094	STCa-15648	CATGGTCAAAAGGGAAACAGCCCAGA						1.692	0.148	0	94
834	Ca	SS	1095	STCa-15745	CATGGTCCAAATTTGTGAATGACAAG						1.692	0.00817	69.2	376	0.642906
835	Ca	SS	1097	STCa-15819	CATGGTCTACAAAATGAGATATTCAA						1.692	0.148	0	94
836	Ca	SS	1099	STCa-15825	CATGGTCTACAAAATGAGATATTTTT						1.692	0.148	0	94
31625	Ca	SS	1100	STCa-15837	CATGGTCTCCTTCAACGTCTCGAATC	ADF_VITVI	Q8SAG3	7e-08	Actin-depolymerizing factor (ADF)	GO:0003779,GO:0005622	1.692	0.148	0	94
838	Ca	SS	1101	STCa-15947	CATGGTGAGATTTTTATTGAAAGGTA						1.692	0.148	0	94
839	Ca	SS	1103	STCa-16172	CATGGTGGGATTGTGAATTCGAGCAG						1.692	0.148	0	94
840	Ca	SS	1104	STCa-16683	CATGGTTGGATATTGGAATGGGAAGA						1.692	0.148	0	94
28128	Ca	SS	1105	STCa-16912	CATGTAAAAATCATCACACAGAAAAG						1.692	0.148	0	94
842	Ca	SS	1106	STCa-16938	CATGTAAAAGTTATAAATAACATTGG						1.692	0.148	0	94
36606	Ca	SS	1107	STCa-16941	CATGTAAAATAAAAATCTCATCAATA						1.692	0.148	0	94
844	Ca	SS	1108	STCa-17058	CATGTAAATAATGGTTAAAGGAAATG						1.692	0.148	0	94	0.730925
845	Ca	SS	1109	STCa-17152	CATGTAAATTGTTTGTATTTTGTGGT						1.692	0.148	0	94
846	Ca	SS	1110	STCa-17222	CATGTAACATTTTATGTTGTATATTT	ZDS_CAPAN	Q9SMJ3	1e-06	Zeta-carotene desaturase, chloroplast/chromoplast precursor (EC 1.14.99.30) (Carotene 7,8-desaturase)	GO:0016491,GO:0016719,GO:0006118,GO:0008152,GO:0016117,GO:0009507	1.692	0.148	0	94	0.526502
26162	Ca	SS	1111	STCa-17290	CATGTAACTTTGGAAGTAATTAGTTG						1.692	0.148	0	94
849	Ca	SS	1112	STCa-17298	CATGTAAGAAAATTCTCTAATATTAA						1.692	0.148	0	94
851	Ca	SS	1113	STCa-17325	CATGTAAGATGTGTGGATAATAAATT						1.692	0.148	0	94
34267	Ca	SS	1114	STCa-17636	CATGTAATTTAGGAACTTAAATAAAA						1.692	0.148	0	94
853	Ca	SS	1115	STCa-17678	CATGTACAAAAGAAGTCACCAGTAAC						1.692	0.148	0	94
27985	Ca	SS	1116	STCa-18096	CATGTACTGTGATTAGTGTATAAAAT						1.692	0.148	0	94
855	Ca	SS	1121	STCa-18170	CATGTAGAAGCTGATCAAGTTTCAGA						1.692	0.148	0	94
37624	Ca	SS	1122	STCa-18390	CATGTAGCTGCAAAGAGGAGGTTGTG						1.692	0.148	0	94
8429	Ca	SS	1126	STCa-18466	CATGTAGGTCAGAGCGTCTCGCTAAG	Q6RIB7_SOYBN	Q6RIB7	0.009	Enolase (EC 2.3.1.16)	GO:0000287,GO:0003988,GO:0016740,GO:0004634,GO:0016829,GO:0008415,GO:0006096,GO:0000015	1.692	0.148	0	94
37813	Ca	SS	1127	STCa-18959	CATGTATGAAAACATAAAATTTGTAA						1.692	0.148	0	94
34323	Ca	SS	1131	STCa-19052	CATGTATGCTCACCGAATCTCTTGTG						1.692	0.148	0	94
3332	Ca	SS	1134	STCa-19209	CATGTATTATTATGTAATAATAATGG	Q6X0M7_SOYBN	Q6X0M7	0.007	CBL-interacting protein (CIPK)	GO:7165	1.692	0.148	0	94	0.21188
861	Ca	SS	1135	STCa-19252	CATGTATTGAAATATTAAACAGCATA						1.692	0.148	0	94
862	Ca	SS	1137	STCa-19278	CATGTATTGCTCAATAGATATACAAC						1.692	0.148	0	94
863	Ca	SS	1139	STCa-19325	CATGTATTTCAAAGTATAATTTTGGA						1.692	0.148	0	94
864	Ca	SS	1141	STCa-19329	CATGTATTTCATAGAGTGTACTTATT						1.692	0.148	0	94
865	Ca	SS	1142	STCa-19377	CATGTATTTTTAGTTTTCTAATAAGA	Q8H288_ANACO	Q8H288	0.001	Class-1 LMW heat shock protein (HSP)	GO:0006457,GO:0006986	1.692	0.148	0	94
38843	Ca	SS	1143	STCa-19710	CATGTCATTTGATTTTTTAAGGAAAG						1.692	0.148	0	94
867	Ca	SS	1144	STCa-20006	CATGTCTAAACTCTTGTTAATTTAGT						1.692	0.148	0	94
868	Ca	SS	1146	STCa-20081	CATGTCTCATACTTTATATTTATGAA						1.692	0.148	0	94
869	Ca	SS	1147	STCa-20139	CATGTCTGGCTTTATCAAATTGTAGT						1.692	0.148	0	94
39208	Ca	SS	1148	STCa-20241	CATGTCTTTGAGGGTTTGGAGTCTCT	Q84KK6_GLYEC	Q84KK6	0.0001	S-adenosyl-L-methionine: 2,7,4'-trihydroxyisoflavanone 4'-O-methyltransferase	GO:0008171,GO:0008168,GO:0016740,GO:0009809	1.692	0.0824	34.6	188
19496	Ca	SS	1149	STCa-20279	CATGTGAAAAATATAAATTTGCTGAA	O65030_ORYSA	O65030	0.009382	1-aminocyclopropane-1-carboxylate oxidase (Fragment)	GO:0016216,GO:0005506,GO:0016491,GO:0017000	1.692	0.148	0	94
872	Ca	SS	1150	STCa-20303	CATGTGAAAGCTAACTGAGTTGCAAT	RS12_HORVU	Q9XHS0	0.009382	40S ribosomal protein S12	GO:0003735,GO:0006412,GO:0005622,GO:0005840,GO:0030529	1.692	0.148	0	94	0.356975
873	Ca	SS	1151	STCa-20348	CATGTGAACTTGCTATTTTGCATTAA						1.692	0.148	0	94
40249	Ca	SS	1152	STCa-20468	CATGTGACATTTCACAAATTTCATAA						1.692	0.148	0	94
22874	Ca	SS	1153	STCa-20544	CATGTGAGCAAAAAAAAAAAAAAAAA						1.692	0.148	0	94
876	Ca	SS	1154	STCa-20620	CATGTGATATCTGTATTGAATTCATT						1.692	0.148	0	94
877	Ca	SS	1156	STCa-20710	CATGTGATTATGCATATTGCTTAGGG						1.692	0.148	0	94
14097	Ca	SS	1157	STCa-20811	CATGTGCATATCTACTGGAAGATTTC	Q94JT6_ARATH	Q94JT6	2e-05	At1g78070/F28K19_28	GO:	1.692	0.148	0	94
879	Ca	SS	1159	STCa-20880	CATGTGCTAAAATATTGTATTTCATT						1.692	0.148	0	94
880	Ca	SS	1160	STCa-21103	CATGTGGATTCTGGATTCAAAAAAAA						1.692	0.148	0	94
5851	Ca	SS	1162	STCa-21121	CATGTGGCAAGAGAAAGGGAAAATGA	Q6WAY4_PEA	Q6WAY4	0.007	Hypothetical protein	GO:	1.692	0.148	0	94
882	Ca	SS	1164	STCa-21618	CATGTGTATTTAGGCACTTCCAGGGT						1.692	0.148	0	94
883	Ca	SS	1165	STCa-21768	CATGTGTGATGTATTGTTGTAATTCG	Q8GTE0_CICAR	Q8GTE0	7e-06	Aquoporin-like water channel protein	GO:0015288,GO:0005215,GO:0006810,GO:0016020,GO:0019867,GO:0016021	1.692	0.148	0	94
884	Ca	SS	1166	STCa-21914	CATGTGTGTTTGTGTATCGCACAATT						1.692	0.148	0	94
885	Ca	SS	1167	STCa-21921	CATGTGTGTTTTTGTAAATTAAATTA	Q6V5B3_CARAS	Q6V5B3	0.004	Nuclear division RFT1-like protein	GO:0005319,GO:0006869,GO:0000280,GO:0016021	1.692	0.148	0	94
886	Ca	SS	1170	STCa-21949	CATGTGTTACTTTTGTTGAGTACCAC	Q41064_PEA	Q41064	7e-05	Thiolprotease	GO:0008233,GO:0004197,GO:0016787,GO:0008234,GO:0006508	1.692	0.0824	34.6	188
29036	Ca	SS	1172	STCa-21957	CATGTGTTAGCGTCAAACACCAATAC						1.692	0.148	0	94
888	Ca	SS	1174	STCa-22028	CATGTGTTGGAATAAAATATCTTGCT						1.692	0.148	0	94
889	Ca	SS	1178	STCa-22044	CATGTGTTGTCTCTTTAATTGCTAGC						1.692	0.148	0	94
43910	Ca	SS	1179	STCa-22066	CATGTGTTTAGCTTGGGTGAACTATG						1.692	0.148	0	94
891	Ca	SS	1181	STCa-22131	CATGTTAAAATACTCTTATGCTAAGT						1.692	0.148	0	94
892	Ca	SS	1182	STCa-22149	CATGTTAAACTTAACATCAGTGCAAT	ACPM_ARATH	P53665	3e-07	Acyl carrier protein, mitochondrial precursor (ACP) (NADH-ubiquinone oxidoreductase 9.6 kDa subunit) (MtACP-1)	GO:0016491,GO:0000036,GO:0031177,GO:0048037,GO:0008610,GO:0006633,GO:0005739	1.692	0.148	0	94
893	Ca	SS	1183	STCa-22164	CATGTTAAATAATAATTAAAGAAAAT						1.692	0.148	0	94
895	Ca	SS	1184	STCa-22176	CATGTTAAATTTGTACACGTTTCTCC						1.692	0.148	0	94
40086	Ca	SS	1185	STCa-22193	CATGTTAACTTTCAAGAATATAGATG						1.692	0.148	0	94
897	Ca	SS	1186	STCa-22238	CATGTTAATCAAGCATTTCCCATTGA						1.692	0.148	0	94
14098	Ca	SS	1188	STCa-22265	CATGTTAATGTACTGACTAAAGAGGT						1.692	0.148	0	94
903	Ca	SS	1189	STCa-22270	CATGTTAATGTCTTGAATTTTTGGAT						1.692	0.148	0	94	0.739076
904	Ca	SS	1190	STCa-22295	CATGTTAATTTCAATATATTGATCAC						1.692	0.148	0	94
905	Ca	SS	1191	STCa-22299	CATGTTAATTTTAAATCCATTATTTG						1.692	0.00817	69.2	376	0.513422
14703	Ca	SS	1192	STCa-22396	CATGTTACTTCTTCATTTTATTTTAT						1.692	0.148	0	94
907	Ca	SS	1193	STCa-22435	CATGTTAGGACTATTCATAAACTAAT	Q6L8U0_CUCSA	Q6L8U0	2e-05	Auxin response factor 4	GO:0003677,GO:0046983,GO:0045449,GO:0006355,GO:0009725,GO:0005634	1.692	0.148	0	94
908	Ca	SS	1194	STCa-22619	CATGTTATGTCTACTGTAATAATAAA						1.692	0.148	0	94
909	Ca	SS	1195	STCa-22752	CATGTTCACAGAATGGCTTTTTCTCC						1.692	0.148	0	94
910	Ca	SS	1196	STCa-22770	CATGTTCACGAGGATGGTATGATGAT	Q9FT05_CICAR	Q9FT05	0.007	Cationic peroxidase	GO:0016491,GO:0004601,GO:0046872,GO:0006979	1.692	0.148	0	94
911	Ca	SS	1199	STCa-22798	CATGTTCAGGAAGCAACATAAAAAGG	RL24_CICAR	RL24	4e-07	60S ribosomal protein L24	GO:0003735,GO:0006412,GO:0005622,GO:0005840,GO:0030529	1.692	0.148	0	94
14704	Ca	SS	1200	STCa-22885	CATGTTCCGAGATTAATTTTCCTGTG						1.692	0.0824	34.6	188
913	Ca	SS	1201	STCa-22963	CATGTTCTCAAATGATTAATGAATGT						1.692	0.0824	34.6	188
11518	Ca	SS	1202	STCa-23341	CATGTTGCTGTGGATTATTTTTGTCG	O22252_ARATH	O22252	0.002374	Putative Na+/Ca2+ antiporter (Magnesium/proton exchanger AtMHX)	GO:16021	1.692	0.148	0	94	0.65752
27458	Ca	SS	1204	STCa-23385	CATGTTGGACAGCTCATAGGATCTTT						1.692	0.0824	34.6	188
916	Ca	SS	1205	STCa-23480	CATGTTGGTGCAAAAAAAAAAAAAAA						1.692	0.148	0	94
917	Ca	SS	1206	STCa-23548	CATGTTGTACATAATTTATCATCTAA						1.692	0.148	0	94
21477	Ca	SS	1207	STCa-23825	CATGTTTAGTTTTTCCCCTCTTCTTT						1.692	0.148	0	94
919	Ca	SS	1208	STCa-23867	CATGTTTATTATTATTTCTAATAGTC						1.692	0.148	0	94
920	Ca	SS	1210	STCa-23910	CATGTTTCACTTCGATTTTGAGACAA						1.692	0.148	0	94
921	Ca	SS	1211	STCa-23987	CATGTTTCTTTTCAGGTTCTTGGTCT						1.692	0.148	0	94
922	Ca	SS	1212	STCa-24024	CATGTTTGAGATGGAGAAGGTGAAAG	Q8L5Q7_CICAR	Q8L5Q7	0.007	Putative quinone oxidoreductase	GO:0016491,GO:0010181,GO:0003960	1.692	0.148	0	94
14706	Ca	SS	1214	STCa-24035	CATGTTTGATATTTTATTGAAATGAT						1.692	0.148	0	94
924	Ca	SS	1217	STCa-24119	CATGTTTGGATTAAGGTTATATTAAT						1.692	0.148	0	94
925	Ca	SS	1219	STCa-24328	CATGTTTTGAAGAGACTGAGCAATGG						1.692	0.148	0	94
926	Ca	SS	1221	STCa-24439	CATGTTTTTGTAGCCAATTATTATTT						1.692	0.148	0	94
927	Ca	SS	1222	STCa-1099	CATGAAGAAACTCCAGAGGAAGAAGG	RS8_PRUAR	O81361	2e-05	40S ribosomal protein S8	GO:0005622,GO:0030529	1.672	1.72e-05	173	921
14707	Ca	SS	1224	STCa-7327	CATGCAGCACCTAATGGGAATCGATG						1.658	2.92e-06	208	1090	2.4824
21123	Ca	SS	1226	STCa-10485	CATGCTTTGTGCCAAAAATCCATTTT	IFR_CICAR	IFR	4e-07	Isoflavone reductase; NADPH:isoflavone oxidoreductase; 2'-hydroxyisoflavone reductase; IFR	GO:0016564,GO:0016491,GO:0047526,GO:0006808	1.654	6.13e-08	277	1450
930	Ca	SS	1227	STCa-6479	CATGCAAGCCATTTGAGTAACTTCTA	HIPL1_ARATH	Q9SSG3	2e-05	HIPL1 protein precursor	GO:0048503,GO:0016491,GO:0016020	1.641	0.0116	69.2	357	-1.03846
931	Ca	SS	1230	STCa-10841	CATGGAAGAAAGGATGGAGCAAAGTC						1.641	0.000206	138	714	0.91749
932	Ca	SS	1231	STCa-12994	CATGGCCAGGGACAGGGTAGTACTGC						1.641	0.000206	138	714
26426	Ca	SS	1232	STCa-1023	CATGAACTCGCGTGGTTTTATTTGCT						1.587	0.118	34.6	169
31179	Ca	SS	1234	STCa-1068	CATGAACTTGATAGAATAAGTGGTTT	Q8LKQ7_ARATH	Q8LKQ7	0.0003	VTC2	GO:	1.587	0.0164	69.2	338	0.880456
935	Ca	SS	1236	STCa-1425	CATGAAGGAATATTTTCATTCCGTAG						1.587	0.118	34.6	169	0.110647
936	Ca	SS	1237	STCa-3724	CATGAGGTCCCCACACACAAATAAAA						1.587	0.118	34.6	169
3424	Ca	SS	1238	STCa-4526	CATGATCAAAGACGATATATAACAAC						1.587	0.118	34.6	169
30136	Ca	SS	1239	STCa-5343	CATGATGGTTTTATGTTATGTTGGAG						1.587	0.0164	69.2	338
939	Ca	SS	1240	STCa-5424	CATGATGTCTGCGAATGAAAATTGAC						1.587	0.118	34.6	169
28877	Ca	SS	1241	STCa-5651	CATGATTCAAAAGCATATAGCTTAGT						1.587	0.118	34.6	169
941	Ca	SS	1242	STCa-6220	CATGCAAAGCTTATAAAGTTCATACA						1.587	0.118	34.6	169
12154	Ca	SS	1243	STCa-7086	CATGCACTACCCAATGTCTCTTAAAT						1.587	0.118	34.6	169	-0.379797
18717	Ca	SS	1244	STCa-7217	CATGCAGAAGGTTGTGAATTGTGATG	ERD2_PETHY	ERD2	0.0005	ER lumen protein retaining receptor (HDEL receptor) (PGP169-12)	GO:0004872,GO:0046923,GO:0015031,GO:0006810,GO:0006621,GO:0006888,GO:0016020,GO:0005783,GO:0016021	1.587	0.118	34.6	169
944	Ca	SS	1245	STCa-7632	CATGCAGTTTCGTAAATAAAGTTGTA						1.587	0.0164	69.2	338
945	Ca	SS	1248	STCa-7715	CATGCATACTTCTATGTGGAAGTTGC						1.587	0.118	34.6	169
19229	Ca	SS	1249	STCa-7785	CATGCATATCTATGTATATTGTATAG						1.587	0.118	34.6	169
947	Ca	SS	1251	STCa-8095	CATGCATTTTCATTTTATGGAATCTA						1.587	0.118	34.6	169
28450	Ca	SS	1252	STCa-8631	CATGCCGAACTATATCGTGCTTCTTT						1.587	0.118	34.6	169
949	Ca	SS	1254	STCa-9725	CATGCTCAGATATCAGCACTATTCTC	Q9ZQE5_ARATH	Q9ZQE5	0.004	Expressed protein (At2g15690/F9O13.24)	GO:	1.587	0.118	34.6	169	-1.07294
950	Ca	SS	1255	STCa-12874	CATGGCATTGCTGCGTAAATGAGCTG						1.587	0.118	34.6	169	-0.636767
951	Ca	SS	1256	STCa-15761	CATGGTCCCTATTATATAGTCAAGAG						1.587	0.118	34.6	169	-1.24133
2958	Ca	SS	1257	STCa-17470	CATGTAATATCCTTACCAAATTCATT						1.587	0.118	34.6	169
953	Ca	SS	1259	STCa-17567	CATGTAATGTGTAACTATAAATAAAT	Q5D875_MEDTR	Q5D875	3e-05	Calcium-dependent protein kinase CDPK1444 (CDPK)	GO:0004672,GO:0005524,GO:0000166,GO:0004674,GO:0005509,GO:0016301,GO:0016740,GO:0006468	1.587	0.118	34.6	169	0.724646
7663	Ca	SS	1261	STCa-18053	CATGTACTCAAAGTATTCAAAATTAT						1.587	0.118	34.6	169
955	Ca	SS	1263	STCa-18900	CATGTATCATTTGGATGTTGAATTTG	Q9FY63_ARATH	Q9FY63	0.004	Ser/thr specific protein kinase-like protein	GO:0004672,GO:0005524,GO:0000166,GO:0004674,GO:0016301,GO:0016740,GO:0006468	1.587	0.118	34.6	169
7664	Ca	SS	1264	STCa-19083	CATGTATGGTCTACAAAATGAGATAT						1.587	0.118	34.6	169
19705	Ca	SS	1265	STCa-19239	CATGTATTCGTAAGAAGAGGCTAGGA						1.587	0.118	34.6	169
958	Ca	SS	1267	STCa-20064	CATGTCTATTTTATGAATTCGAGCAG						1.587	0.118	34.6	169
959	Ca	SS	1268	STCa-20167	CATGTCTTAAAAAGATATATAGTTGG						1.587	0.0164	69.2	338
960	Ca	SS	1269	STCa-20403	CATGTGAATACTGTAAGAATTCGATT	Q8RX56_ARATH	Q8RX56	2e-05	AT5g06970/MOJ9_14	GO:	1.587	0.118	34.6	169
961	Ca	SS	1270	STCa-20795	CATGTGCAGGATTGAATTTCATTTAG						1.587	0.000406	138	677	0.558472
962	Ca	SS	1271	STCa-22135	CATGTTAAAATGAAGCAGCATTTTGT						1.587	0.118	34.6	169
963	Ca	SS	1272	STCa-24358	CATGTTTTGCCAATAATTCAGTTAAG	Q9FN19_ARATH	Q9FN19	0.009	Arabidopsis thaliana genomic DNA, chromosome 5, TAC clone:K8K14 (At5g67320/K8K14_4)	GO:0030154,GO:0007275	1.587	0.118	34.6	169
3420	Ca	SS	1275	STCa-12007	CATGGAGTAGGAGAACCAACTGAATT						1.565	9.38e-05	173	827
965	Ca	SS	1276	STCa-23911	CATGTTTCAGAAGCTTCACAAATAAT	Q9M445_CICAR	Q9M445	4e-07	Hypothetical protein	GO:	1.559	0.000569	138	658
966	Ca	SS	1278	STCa-2416	CATGACAGACTTGTCTCACTTGATTT						1.549	0.00354	104	489
21034	Ca	SS	1279	STCa-7101	CATGCACTATTATTAGTACTCCGTTA						1.549	0.00354	104	489
968	Ca	SS	1281	STCa-6698	CATGCAATGTAATATAAGACCCTAAT						1.53	0.0231	69.2	320
969	Ca	SS	1283	STCa-5966	CATGATTTGAATGTGATTGGGAAGCT						1.504	1e-05	242	1090
970	Ca	SS	1284	STCa-15159	CATGGGTGTTTTCAGTTTTGAGGATG	DRR4_PEA	DRR4	0.002	Disease resistance response protein DRRG49-C	GO:0009607,GO:0006952	1.504	1e-05	242	1090	0.67039
914	Ca	SS	1285	STCa-40	CATGAAAAAAGCCAATAAAGATGTGG						1.469	0.228	0	75.2
1308	Ca	SS	1286	STCa-45	CATGAAAAAATAGTTTTTATATACAG						1.469	0.228	0	75.2
973	Ca	SS	1287	STCa-128	CATGAAAAGAAAAAGGGAATTTGGTA						1.469	0.228	0	75.2
8564	Ca	SS	1288	STCa-133	CATGAAAAGAATGAATGAATGAAGTA	Q9LW32_ARATH	Q9LW32	0.002374	Selenium-binding protein-like	GO:	1.469	0.228	0	75.2
975	Ca	SS	1289	STCa-158	CATGAAAAGTATGACGTGGAGCATTG	Q9XGH9_MEDTR	Q9XGH9	0.0001	TRE1 protein	GO:0004555,GO:0005991	1.469	0.228	0	75.2
976	Ca	SS	1292	STCa-169	CATGAAAATAACTAGAAATATTTGGC						1.469	0.228	0	75.2
16114	Ca	SS	1293	STCa-173	CATGAAAATAATGAAACACACCGTTT						1.469	0.228	0	75.2
978	Ca	SS	1294	STCa-210	CATGAAAATCTGAAGCCTGTATTGTC	CWF8_SCHPO	O14011	2e-05	Cell cycle control protein cwf8	GO:0004842,GO:0005515,GO:0006397,GO:0006512,GO:0000398,GO:0008380,GO:0016567,GO:0005737,GO:0000151,GO:0005681,GO:0005635,GO:0005829,GO:0005634	1.469	0.228	0	75.2
979	Ca	SS	1295	STCa-212	CATGAAAATGAAAACATATAAAATTG	Q60EC2_ORYSA	Q60EC2	0.001	Unknow protein	GO:	1.469	0.228	0	75.2
3881	Ca	SS	1296	STCa-324	CATGAAACGGTGGTGATATGAGCTAG						1.469	0.168	34.6	150
35988	Ca	SS	1297	STCa-366	CATGAAACTGTTATTTTTCATAGCTT	Q6K653_ORYSA	Q6K653	2e-05	Ubiquitin-associated (UBA)/TS-N domain-containing protein-like	GO:0003676,GO:0008270,GO:0005622	1.469	0.228	0	75.2
982	Ca	SS	1298	STCa-432	CATGAAAGATTGGAGGCTTTGGAGAA	Q9SGR3_ARATH	Q9SGR3	0.004	T23E18.14 (At1g76210)	GO:	1.469	0.228	0	75.2
10075	Ca	SS	1299	STCa-449	CATGAAAGCGGAGACCAAGGGGAACG						1.469	0.228	0	75.2
984	Ca	SS	1300	STCa-545	CATGAAATACTCAAGTGTTGTAAATG						1.469	0.228	0	75.2
3115	Ca	SS	1304	STCa-558	CATGAAATATAAATGCTAATCTTAGG						1.469	0.228	0	75.2
986	Ca	SS	1305	STCa-573	CATGAAATATTGAACTGGAATGCTTT						1.469	0.168	34.6	150
987	Ca	SS	1307	STCa-618	CATGAAATGCAGTTTCTTAATTATAA						1.469	0.228	0	75.2
988	Ca	SS	1308	STCa-680	CATGAAATTATTGTATTTATTTCCAT						1.469	0.228	0	75.2
989	Ca	SS	1309	STCa-681	CATGAAATTCAAGTCATAACTACATC						1.469	0.228	0	75.2
4886	Ca	SS	1311	STCa-700	CATGAAATTGGAATTGAGAAATGGAT	RR17_PEA	RR17	0.002	30S ribosomal protein S17, chloroplast precursor; CS17	GO:0003735,GO:0003723,GO:0019843,GO:0006412,GO:0005622,GO:0005840,GO:0009507,GO:0030529	1.469	0.228	0	75.2
991	Ca	SS	1312	STCa-714	CATGAAATTGTAGATAACTGTTTGTA	Q9SMJ8_CICAR	Q9SMJ8	2e-06	Putative water channel protein	GO:0005215,GO:0006810,GO:0016020,GO:0016021	1.469	0.228	0	75.2
4889	Ca	SS	1313	STCa-744	CATGAACAAAAAAAAAAAAAAAAAAA						1.469	0.228	0	75.2
993	Ca	SS	1314	STCa-886	CATGAACCAAAAGAAACTAATAAAAC						1.469	0.168	34.6	150
994	Ca	SS	1315	STCa-1027	CATGAACTCTAGAAATCATAAAGATG						1.469	0.228	0	75.2
8856	Ca	SS	1316	STCa-1040	CATGAACTGTAAACATTTGAAACTTT						1.469	0.228	0	75.2
996	Ca	SS	1318	STCa-1070	CATGAACTTGCTTCTCCTTCCAGTTT						1.469	0.228	0	75.2
997	Ca	SS	1319	STCa-1135	CATGAAGAAGCAGCCTTGTGTAGTTA	MSK3_MEDSA	MSK3	0.002	Glycogen synthase kinase-3 homolog MsK-3	GO:0004672,GO:0005524,GO:0000166,GO:0004674,GO:0016301,GO:0016740,GO:0006468	1.469	0.228	0	75.2
998	Ca	SS	1320	STCa-1272	CATGAAGATCTTGGAGTAGCTGATAG	Q700B0_CICAR	Q700B0	4e-07	Pyruvate dehydrogenase kinase	GO:0005524,GO:0004673,GO:0004740,GO:0016301,GO:0016740,GO:0016772,GO:0018106,GO:0016310,GO:0000160,GO:0016020,GO:0016021	1.469	0.228	0	75.2	0.848868
999	Ca	SS	1322	STCa-1299	CATGAAGATGTGATCGCTGCCGAAAG						1.469	0.228	0	75.2
1000	Ca	SS	1324	STCa-1461	CATGAAGGCCTATAACAAGAAACAGG	Q41026_PEA	Q41026	0.002	HMG 1 protein (HMG)	GO:0003677,GO:0006355,GO:0000785,GO:0005634	1.469	0.228	0	75.2
29856	Ca	SS	1326	STCa-1485	CATGAAGGGTTTGTTATTCCTTTATT	O65754_CICAR	O65754	4e-07	Putative beta-amilase	GO:0003824,GO:0043169,GO:0016161,GO:0005975,GO:0000272	1.469	0.168	34.6	150
1002	Ca	SS	1327	STCa-1590	CATGAAGTTAAAAAAAAAAAAAAAAA						1.469	0.228	0	75.2
1003	Ca	SS	1328	STCa-1642	CATGAATAAAATAAGAAGTCTCTGTA	Q945P5_ARATH	Q945P5	0.009382	AT3g62580/T12C14_280	GO:	1.469	0.168	34.6	150	0.198031
1004	Ca	SS	1330	STCa-1680	CATGAATAATAGAGTGATTTAGTTAA	Q6IZE4_PEA	Q6IZE4	0.007	Eukaryotic translation initiation factor 4E	GO:0003743,GO:0003723,GO:0006413,GO:0005737	1.469	0.228	0	75.2
1005	Ca	SS	1331	STCa-1684	CATGAATAATTTTTCTGCGGCTCTGA						1.469	0.228	0	75.2
1006	Ca	SS	1332	STCa-1734	CATGAATATAATGATTCAGTTACTGT	Q8L3W1_ARATH	Q8L3W1	0.001	Reduced vernalization response 1 (At3g18990)	GO:0003677,GO:0006355	1.469	0.228	0	75.2
6279	Ca	SS	1333	STCa-1743	CATGAATATCAGTTTCAGTTTGGATT	O81366_PRUAR	O81366	0.009	Late embryogenesis-like protein (Fragment) (LEA-Prot)	GO:9269	1.469	0.228	0	75.2
1008	Ca	SS	1334	STCa-1768	CATGAATATTTACTTTATGATTGTTA						1.469	0.228	0	75.2
1009	Ca	SS	1335	STCa-2092	CATGAATTAGGAATATCATAAGTTGT						1.469	0.228	0	75.2
42394	Ca	SS	1336	STCa-2093	CATGAATTAGGAGGATTCCTTGTAGC						1.469	0.228	0	75.2
9146	Ca	SS	1337	STCa-2133	CATGAATTGCCATAAAAAAAAACATT						1.469	0.228	0	75.2
1012	Ca	SS	1338	STCa-2137	CATGAATTGGAAGGATTGAGCATTAC						1.469	0.228	0	75.2
1013	Ca	SS	1339	STCa-2185	CATGAATTTGATAATGTACAATATAT						1.469	0.228	0	75.2
18893	Ca	SS	1340	STCa-2219	CATGACAAAAAAAAAAAAAAAAAAAC						1.469	0.228	0	75.2
27442	Ca	SS	1341	STCa-2233	CATGACAAAATAATACATCGTGCAGA						1.469	0.228	0	75.2
20476	Ca	SS	1343	STCa-2266	CATGACAAATTGCTCTAAAAAAAAAA						1.469	0.228	0	75.2
1017	Ca	SS	1344	STCa-2268	CATGACAAATTGCTCTATCTTTTAAT						1.469	0.228	0	75.2
1018	Ca	SS	1346	STCa-2345	CATGACAATGTTTATTGAAAATCTGT						1.469	0.228	0	75.2
1019	Ca	SS	1347	STCa-2396	CATGACACTGATCAAGAAGCAACTCT						1.469	0.228	0	75.2
43201	Ca	SS	1349	STCa-2621	CATGACCCATTCCAAAGAGGATTGTT						1.469	0.228	0	75.2
1021	Ca	SS	1350	STCa-2639	CATGACCCTCAAGATCAAAATTGTTT						1.469	0.228	0	75.2
43625	Ca	SS	1351	STCa-2679	CATGACCTCAGAATAGAATATATATG						1.469	0.228	0	75.2
7909	Ca	SS	1352	STCa-2687	CATGACCTGTACTTAAATCTTATTTC						1.469	0.228	0	75.2
38184	Ca	SS	1353	STCa-2767	CATGACGGTGTCCTGTTTTGTAAATC						1.469	0.168	34.6	150
1025	Ca	SS	1355	STCa-2865	CATGACTCTAAGGATATTAGCAGGCT	Q9SFB0_ARATH	Q9SFB0	2e-05	Putative integral membrane protein (At3g08040/T8G24.8) (T8G24.8/T8G24.8) (Ferric reductase defective) (MATE efflux family protein, putative)	GO:0015297,GO:0015238,GO:0006855,GO:0016020	1.469	0.228	0	75.2
1026	Ca	SS	1356	STCa-2937	CATGACTTAGATGATTGGGATATATA						1.469	0.168	34.6	150
16163	Ca	SS	1358	STCa-2956	CATGACTTGAATCAGATTGTTCTTTG						1.469	0.168	34.6	150
1028	Ca	SS	1359	STCa-3009	CATGAGAAACAATTAACTAAGAATAT						1.469	0.228	0	75.2
20828	Ca	SS	1360	STCa-3031	CATGAGAAATAGTAACTATGAATATT						1.469	0.228	0	75.2
1030	Ca	SS	1364	STCa-3074	CATGAGAAGCAGGGTATGCAAGATTG						1.469	0.228	0	75.2
10573	Ca	SS	1365	STCa-3094	CATGAGAATATGTTGCACCGGCAAAT						1.469	0.228	0	75.2
1032	Ca	SS	1366	STCa-3097	CATGAGAATATTTTAAAAATGTTTTT						1.469	0.228	0	75.2
41338	Ca	SS	1368	STCa-3116	CATGAGAATTAAGAATATTTGATGGA						1.469	0.228	0	75.2	0.0411419
37452	Ca	SS	1369	STCa-3181	CATGAGAGATGGTTTCTTGTAATAAA						1.469	0.228	0	75.2
1035	Ca	SS	1370	STCa-3183	CATGAGAGATTCACAAAGGAGTTCGA	Q9SEA8_MESCR	Q9SEA8	3e-07	Salt-induced AAA-Type ATPase	GO:0005524,GO:0000166,GO:0017111	1.469	0.228	0	75.2
1036	Ca	SS	1371	STCa-3242	CATGAGATATTGGATTATATCTTTCT	Q8LPE6_CICAR	Q8LPE6	4e-07	Epoxide hydrolase	GO:0003824,GO:0016787,GO:0004301,GO:0006725	1.469	0.228	0	75.2
1037	Ca	SS	1372	STCa-3312	CATGAGCAAAAAAAAAAAAAAAAAAA						1.469	0.228	0	75.2
1038	Ca	SS	1373	STCa-3314	CATGAGCAAAAAAAACCCTGTTGGTC						1.469	0.228	0	75.2
17549	Ca	SS	1374	STCa-3395	CATGAGCCTATGCCACCAACTTTGTT	Q9ZP08_CICAR	Q9ZP08	0.0001	Chlorophyll a/b binding protein precursor	GO:0009765,GO:0016020	1.469	0.228	0	75.2
9517	Ca	SS	1375	STCa-3438	CATGAGCTGGTAAATTATTCTCCTCT	NCKP1_ARATH	NCKP1	0.0003	Protein NAP1 (Nck-associated protein 1) (AtNAP1) (AtNAP125) (p125Nap1) (NAP of plants) (ARP2/3 regulatory protein subunit NAPP) (Protein GNARLED)	GO:	1.469	0.168	34.6	150
1041	Ca	SS	1376	STCa-3439	CATGAGCTGTATATATAAATTGTAAT						1.469	0.228	0	75.2
6527	Ca	SS	1377	STCa-3443	CATGAGCTTAAAGACGTATTTATGTA	Q9XGL7_CICAR	Q9XGL7	0.0001	Cytochrome P450	GO:0004497,GO:0005506,GO:0016491,GO:0020037,GO:0046872,GO:0006118,GO:0016020	1.469	0.228	0	75.2
31582	Ca	SS	1378	STCa-3447	CATGAGCTTCAATATTTTATTTTATC						1.469	0.228	0	75.2
13313	Ca	SS	1379	STCa-3538	CATGAGGATAATAAGTTAGTGTCATT						1.469	0.228	0	75.2	0.226338
1045	Ca	SS	1380	STCa-3771	CATGAGTAAAAAAAAAAAAAAAAAAA						1.469	0.228	0	75.2
1046	Ca	SS	1381	STCa-3794	CATGAGTAGAAAGCCAAAGGAATGAG						1.469	0.228	0	75.2
9884	Ca	SS	1382	STCa-3973	CATGAGTTAGACAATATTATAAGAAA						1.469	0.228	0	75.2
26227	Ca	SS	1383	STCa-4000	CATGAGTTCTTGATACTATCAAAATC						1.469	0.228	0	75.2
10419	Ca	SS	1385	STCa-4025	CATGAGTTGTTGTTACTGGAATGGTT						1.469	0.228	0	75.2
1050	Ca	SS	1386	STCa-4038	CATGAGTTTGGACTAGTGGCTTCAGT						1.469	0.168	34.6	150
1051	Ca	SS	1387	STCa-4079	CATGATAAAGAAGTCTATTATATTTT	Q7XZK4_CICAR	Q7XZK4	4e-07	Calcium-dependent calmodulin-independent protein kinase isoform 2 (CDPK)	GO:0004672,GO:0005524,GO:0000166,GO:0004674,GO:0005509,GO:0016301,GO:0016740,GO:0006468	1.469	0.228	0	75.2
1052	Ca	SS	1389	STCa-4203	CATGATAATTTAGTTCAAGGTCGGCA						1.469	0.228	0	75.2
1053	Ca	SS	1390	STCa-4215	CATGATACAAAGAAATATTTCATTTA						1.469	0.228	0	75.2
1054	Ca	SS	1391	STCa-4283	CATGATAGAATATAGTCAATGTCAGT						1.469	0.228	0	75.2
10577	Ca	SS	1392	STCa-4288	CATGATAGAGAATATCACTGTGAACT						1.469	0.228	0	75.2
19254	Ca	SS	1394	STCa-4389	CATGATATATAATCCCGAGTTGAATG						1.469	0.228	0	75.2
41845	Ca	SS	1395	STCa-4513	CATGATATTTTTATTGGTACTTTGGC						1.469	0.228	0	75.2
1058	Ca	SS	1396	STCa-4559	CATGATCAATATATTAGTTTTAGTTC						1.469	0.228	0	75.2
1059	Ca	SS	1397	STCa-4632	CATGATCCAACGTATGTTTGTATATT						1.469	0.168	34.6	150
22515	Ca	SS	1400	STCa-4855	CATGATGAAGTGAAGTATAACGACTA						1.469	0.228	0	75.2
8445	Ca	SS	1401	STCa-4884	CATGATGACATTGATGAGTGATCACC						1.469	0.228	0	75.2
42252	Ca	SS	1403	STCa-4987	CATGATGATATTTTCTGATCCCAATC						1.469	0.228	0	75.2
1063	Ca	SS	1404	STCa-5170	CATGATGCTTTGTATTTATAGATGTT	Q940H6_ARATH	Q940H6	0.001	Protein kinase-like protein	GO:0004672,GO:0005524,GO:0000166,GO:0004674,GO:0005515,GO:0016301,GO:0016740,GO:0006970,GO:0009651,GO:0009738,GO:0006468,GO:0009737	1.469	0.228	0	75.2
1064	Ca	SS	1405	STCa-5198	CATGATGGACTACCCCTATAAATTAT						1.469	0.228	0	75.2
1065	Ca	SS	1406	STCa-5312	CATGATGGTCAGTGAGATATTGCTGT						1.469	0.228	0	75.2
1066	Ca	SS	1407	STCa-5341	CATGATGGTTTTAATGGAAAGAAGGA						1.469	0.0325	69.2	301	0.876302
1067	Ca	SS	1412	STCa-5521	CATGATTAAAAATAAATATTTTCTGT						1.469	0.228	0	75.2
30614	Ca	SS	1413	STCa-5570	CATGATTACTATTTTATTGGGAGTTA						1.469	0.228	0	75.2
1069	Ca	SS	1414	STCa-5645	CATGATTATTTCTAGTACATAACAAT						1.469	0.228	0	75.2
12441	Ca	SS	1415	STCa-5760	CATGATTGATGATGATGATTCACAAG	Q8S905_ARATH	Q8S905	0.009382	AtNACK1 kinesin-like protein	GO:0003774,GO:0005524,GO:0000166,GO:0003777,GO:0007018,GO:0005875,GO:0005874	1.469	0.228	0	75.2
21111	Ca	SS	1416	STCa-5875	CATGATTGTTGACCAGAAAAATATTA						1.469	0.228	0	75.2
1072	Ca	SS	1417	STCa-5916	CATGATTTATATACCTCATAACTCTT	Q9LY68_ARATH	Q9LY68	0.004	Serin carboxypeptidase-like protein	GO:0004185,GO:0004180,GO:0006508	1.469	0.228	0	75.2
5170	Ca	SS	1419	STCa-5940	CATGATTTCAAGTTGTTTTTAGATAG						1.469	0.228	0	75.2
1074	Ca	SS	1420	STCa-5981	CATGATTTGCTGTGACAGTAATATTT						1.469	0.228	0	75.2
15031	Ca	SS	1423	STCa-6023	CATGATTTTATATAAACTTTGTGATG	Q9FYT2_CAPAN	Q9FYT2	0.0003	Stellacyanin-like protein CASLP1 precursor	GO:0009055,GO:0005507,GO:0006118	1.469	0.228	0	75.2
13210	Ca	SS	1425	STCa-6066	CATGCAAAAAAAAAAAAAAAAAAAAT						1.469	0.228	0	75.2
1077	Ca	SS	1426	STCa-6137	CATGCAAACAAGTGGTGTGTCTATTT	Q9FMV2_ARATH	Q9FMV2	0.000152	Emb|CAB62355.1 (At5g63500) (GPI-anchored protein)	GO:31225	1.469	0.228	0	75.2	0.415415
29299	Ca	SS	1428	STCa-6192	CATGCAAACTTAAGACCCTTTAGTTG						1.469	0.228	0	75.2
43989	Ca	SS	1431	STCa-6199	CATGCAAAGAAGTTATATCAAAGGGT	AMPM2_HUMAN	P50579	1e-07	Methionine aminopeptidase 2 (EC 3.4.11.18) (MetAP 2) (Peptidase M 2) (Initiation factor 2-associated 67 kDa glycoprotein) (p67) (p67eIF2)	GO:0008233,GO:0050897,GO:0008235,GO:0016787,GO:0005515,GO:0004239,GO:0004177,GO:0046872,GO:0006464,GO:0018206,GO:0006508,GO:0006417,GO:0031365,GO:0005737	1.469	0.00692	104	451
1080	Ca	SS	1432	STCa-6255	CATGCAAATCAATTTCATAAATTGTA						1.469	0.228	0	75.2
1081	Ca	SS	1434	STCa-6299	CATGCAACACAATTTTGGAATGTTTT						1.469	0.228	0	75.2
1082	Ca	SS	1435	STCa-6329	CATGCAACATTTTTGTTTTACATCTT						1.469	0.228	0	75.2
1083	Ca	SS	1436	STCa-6369	CATGCAACGAGTGCTTGTCTCTGTTT	Q5WM51_CICAR	Q5WM51	0.0001	Trypsin protein inhibitor 3	GO:4866	1.469	0.228	0	75.2
1084	Ca	SS	1438	STCa-6431	CATGCAAGAACTTACCACGGAGTACA						1.469	0.168	34.6	150
13743	Ca	SS	1439	STCa-6456	CATGCAAGAGTTCTGATGTAATGGAA						1.469	0.228	0	75.2
10647	Ca	SS	1441	STCa-6491	CATGCAAGGAAGTTAGTAATACAAAG						1.469	0.228	0	75.2
10606	Ca	SS	1445	STCa-6514	CATGCAAGGTGATGATTTGAACATTT						1.469	0.228	0	75.2
1088	Ca	SS	1446	STCa-6539	CATGCAAGTCGAACGTTGTTTTCGAG						1.469	0.228	0	75.2
1089	Ca	SS	1448	STCa-6578	CATGCAAGTTGTACCAGCAAATCCAA						1.469	0.228	0	75.2
11924	Ca	SS	1450	STCa-6642	CATGCAATATTCCTAAAGACATTTGT						1.469	0.228	0	75.2
1091	Ca	SS	1451	STCa-6647	CATGCAATCAGGCATATAAAAGAATA						1.469	0.228	0	75.2
5803	Ca	SS	1452	STCa-6694	CATGCAATGGATGAAATTATAAAGTA						1.469	0.228	0	75.2
1093	Ca	SS	1453	STCa-6708	CATGCAATGTTGATGAGACAAGCCAA						1.469	0.228	0	75.2
1094	Ca	SS	1454	STCa-6720	CATGCAATTACGGGTGCCATTCTTTT						1.469	0.228	0	75.2
1095	Ca	SS	1456	STCa-6729	CATGCAATTATTTTATAATTAATTTT						1.469	0.228	0	75.2
1096	Ca	SS	1457	STCa-6744	CATGCAATTGAGAGGAAATGGTCTTT						1.469	0.228	0	75.2
1097	Ca	SS	1458	STCa-6762	CATGCAATTTAAGTTCCTTGGTTATC						1.469	0.228	0	75.2
35536	Ca	SS	1459	STCa-6899	CATGCACAGTACGTATTTTGAATTAC	Q8W419_ARATH	Q8W419	3e-07	Twin LOV protein 1	GO:0004871,GO:0000155,GO:0007165,GO:0006355,GO:0000160	1.469	0.228	0	75.2	0.166362
43388	Ca	SS	1460	STCa-6901	CATGCACAGTGAGGAGGTTTGAATTC						1.469	0.228	0	75.2
1100	Ca	SS	1461	STCa-7007	CATGCACCGTGACTTCAGGGGCAATA						1.469	0.228	0	75.2
15467	Ca	SS	1466	STCa-7068	CATGCACGGTTATCTTTGTCACTATT						1.469	0.228	0	75.2
1102	Ca	SS	1467	STCa-7135	CATGCACTGTTTTAAGGGCATTGCAA	Q9LHE9_ARATH	Q9LHE9	6e-06	Putative myosin	GO:0003774,GO:0005524,GO:0016459,GO:0009504,GO:0009524	1.469	0.228	0	75.2	0.191446
1103	Ca	SS	1468	STCa-7172	CATGCACTTTCAGTTCAAAGTTTGGT						1.469	0.228	0	75.2
1104	Ca	SS	1469	STCa-7196	CATGCACTTTTTGACTTTTTATTGAT						1.469	0.228	0	75.2
1105	Ca	SS	1470	STCa-7278	CATGCAGATGGTGGTGATTCATTAAT						1.469	0.228	0	75.2
666	Ca	SS	1471	STCa-7326	CATGCAGCACCTAATGGGAATCGAGC						1.469	0.228	0	75.2
1107	Ca	SS	1472	STCa-7428	CATGCAGGCTTTAGACCTATCTATAG						1.469	0.228	0	75.2
1108	Ca	SS	1473	STCa-7524	CATGCAGTATATAGATAAAAAAAAAA						1.469	0.228	0	75.2
1109	Ca	SS	1474	STCa-7572	CATGCAGTGCATCATTTTTTCATTGA	Q9FVD5_MEDVA	Q9FVD5	2e-06	Ser/Thr specific protein phosphatase 2A B regulatory subunit alpha isoform	GO:0008601,GO:0007165,GO:0000159	1.469	0.228	0	75.2
43477	Ca	SS	1475	STCa-7695	CATGCATACATATAAGAGTTATTCTC	Q6YUS2_ORYSA	Q6YUS2	0.004	Ubiquitin-conjugating enzyme	GO:0004842,GO:0016874,GO:0006512,GO:0006464	1.469	0.228	0	75.2
10447	Ca	SS	1477	STCa-7782	CATGCATATATTGTATGCTCGACATT						1.469	0.228	0	75.2
1113	Ca	SS	1478	STCa-7793	CATGCATATGTATTCTATACCACCAA						1.469	0.228	0	75.2
1114	Ca	SS	1479	STCa-7796	CATGCATATGTGGGTGGAATTTTAGT						1.469	0.228	0	75.2
33379	Ca	SS	1484	STCa-7818	CATGCATATTTGCTTATGTTGTTGTA	Q8L6V6_CICAR	Q8L6V6	3e-05	Putative ripening related protein	GO:0009607,GO:0006952	1.469	0.228	0	75.2
1116	Ca	SS	1485	STCa-7827	CATGCATATTTGCTTTATGTTGTTTC						1.469	0.228	0	75.2
1117	Ca	SS	1486	STCa-7868	CATGCATCCAATCAAATTACATTATT	Q9FMU4_ARATH	Q9FMU4	0.009	Lysine-sensitive aspartate kinase	GO:0016597,GO:0005524,GO:0000166,GO:0004072,GO:0016301,GO:0016740,GO:0008152,GO:0009088,GO:0008652,GO:0009507	1.469	0.228	0	75.2
1118	Ca	SS	1487	STCa-7941	CATGCATTATACAATTACCCTTTGAT						1.469	0.228	0	75.2
9821	Ca	SS	1488	STCa-7950	CATGCATTATTATGCTATTATATAGT						1.469	0.228	0	75.2
1120	Ca	SS	1489	STCa-8005	CATGCATTGGCCAACTTTAGGGTTGA						1.469	0.228	0	75.2
1121	Ca	SS	1490	STCa-8061	CATGCATTTATCCAAGTGGAAGTACC	Q94G86_OLEEU	Q94G86	0.0003	Beta-1,3-glucanase-like protein	GO:0003824,GO:0004553,GO:0043169,GO:0005975	1.469	0.228	0	75.2
1122	Ca	SS	1492	STCa-8093	CATGCATTTTCAAAAAAAAAAAAAAA						1.469	0.228	0	75.2
1123	Ca	SS	1493	STCa-8206	CATGCCAAGCATAAAATAAATATATG	Q6F4H4_TOBAC	Q6F4H4	0.004	Actin	GO:0005524,GO:0000166,GO:0005198,GO:0005515,GO:0005856	1.469	0.228	0	75.2
1124	Ca	SS	1494	STCa-8361	CATGCCAGATATATATATGATCCGTT						1.469	0.228	0	75.2
1125	Ca	SS	1495	STCa-8363	CATGCCAGATTGTGCAGGATGAGTCT	Q6J739_MEDTR	Q6J739	0.004	AML1	GO:0000166,GO:0003676	1.469	0.168	34.6	150
17022	Ca	SS	1496	STCa-8368	CATGCCAGCATAAAAGGCTAGCGGTG						1.469	0.228	0	75.2
1127	Ca	SS	1497	STCa-8428	CATGCCATCGAGGTATAGGATGGGGT						1.469	0.228	0	75.2	-0.49758
23333	Ca	SS	1499	STCa-8443	CATGCCATTCATCATCTTTTTTTTCC						1.469	0.228	0	75.2
1129	Ca	SS	1500	STCa-8453	CATGCCATTTGCTTGTTCCTCTCTTT						1.469	0.228	0	75.2
10887	Ca	SS	1501	STCa-8457	CATGCCATTTGTGTATGTGTTTCTTC	Q9SW88_CANLI	Q9SW88	0.009	Amine oxidase	GO:5507	1.469	0.228	0	75.2
23741	Ca	SS	1502	STCa-8464	CATGCCATTTTGTTATAATGGTTTGA	Q9W423_DROME	Q9W423	7e-08	CG3576-PA, isoform A (Cg3576-pb, isoform b) (Longevity protein) (LD18904p)	GO:0005515,GO:0003700,GO:0003677,GO:0043565,GO:0045449,GO:0006355,GO:0016021,GO:0005886,GO:0005634	1.469	0.228	0	75.2
15296	Ca	SS	1504	STCa-8546	CATGCCCATAGTGTCATACAAAACCC						1.469	0.228	0	75.2
1133	Ca	SS	1505	STCa-8563	CATGCCCCCTTTACTTTACTTGTAGT						1.469	0.228	0	75.2
1134	Ca	SS	1508	STCa-8624	CATGCCCTTTTATTTGATTACATAAT						1.469	0.228	0	75.2
21524	Ca	SS	1509	STCa-8762	CATGCCTATGGTACTTTCGTAGGTAC						1.469	0.228	0	75.2
1136	Ca	SS	1510	STCa-8771	CATGCCTCACTGGATTTCAATCTTTC						1.469	0.228	0	75.2
1137	Ca	SS	1512	STCa-8773	CATGCCTCAGCTTAATCACAATTTTA						1.469	0.228	0	75.2
1138	Ca	SS	1513	STCa-8777	CATGCCTCCAGAAAAAGAGGAAATGC	Q1SKK1_MEDTR	Q1SKK1	5e-07	Cellular retinaldehyde-binding/triple function, N-terminal	GO:0005215,GO:0006810,GO:0005622	1.469	0.228	0	75.2
1139	Ca	SS	1514	STCa-8779	CATGCCTCCATTGGAGGAAGCTGATT	Q6UJX5_NICBE	Q6UJX5	7e-05	Molecular chaperone Hsp90-2 (HSP)	GO:0005524,GO:0000166,GO:0051082,GO:0006457,GO:0006986	1.469	0.228	0	75.2
1140	Ca	SS	1515	STCa-8859	CATGCCTGTTTTGTTTTGCTGTACAT						1.469	0.228	0	75.2
1141	Ca	SS	1516	STCa-8862	CATGCCTTAACTTTTTAGACAATCTT						1.469	0.228	0	75.2
1142	Ca	SS	1517	STCa-8864	CATGCCTTAATAATTTTAAACTGGTG	Q7XJU2_ARATH	Q7XJU2	1e-06	BHLH transcription factor	GO:0030528,GO:0045449,GO:0005634	1.469	0.228	0	75.2
11964	Ca	SS	1519	STCa-9114	CATGCGCTTTGAATTCATCTGATTTT	Q2PEW5_TRIPR	Q2PEW5	7e-06	Putative phosphoinositide specific phospholipase C (PLC)	GO:0004435,GO:0004629,GO:0007165,GO:0006629,GO:0007242	1.469	0.228	0	75.2
17966	Ca	SS	1520	STCa-9151	CATGCGGATCTAGTTTCTCAAGGTAC						1.469	0.228	0	75.2
1145	Ca	SS	1521	STCa-9254	CATGCGTAATTTTTAATGCGAGAGGA						1.469	0.228	0	75.2
1146	Ca	SS	1525	STCa-9272	CATGCGTCAAACTGTTGCTGTCGGTA	O81921_CICAR	O81921	2e-06	Elongation factor 1-alpha; EF1-a	GO:0003924,GO:0000166,GO:0003746,GO:0005525,GO:0006412	1.469	0.228	0	75.2
1147	Ca	SS	1527	STCa-9288	CATGCGTCCCGTCTTTGGCGGCAGGG						1.469	0.168	34.6	150
2607	Ca	SS	1528	STCa-9395	CATGCTAAACAATAATTAATTATATC						1.469	0.228	0	75.2
1149	Ca	SS	1529	STCa-9460	CATGCTAATATGATTTGACTTTGATA						1.469	0.228	0	75.2
1215	Ca	SS	1531	STCa-9496	CATGCTACACCAGTGGCCAACCATAT						1.469	0.228	0	75.2
1151	Ca	SS	1532	STCa-9508	CATGCTACCGTCATTATGGTTGTATG						1.469	0.228	0	75.2
1152	Ca	SS	1533	STCa-9550	CATGCTAGATGTCATAGTAGACACAT						1.469	0.228	0	75.2
1153	Ca	SS	1534	STCa-9750	CATGCTCCACTTGCTAGTGATTATTA						1.469	0.228	0	75.2
22408	Ca	SS	1535	STCa-9771	CATGCTCCTTAAAAAACAAACATTTA						1.469	0.228	0	75.2
15565	Ca	SS	1536	STCa-9780	CATGCTCGAGTTCCAGACTGTGTTAA						1.469	0.228	0	75.2
18105	Ca	SS	1537	STCa-9794	CATGCTCGGTGCTAAGAGCTCAGTTG						1.469	0.228	0	75.2
1157	Ca	SS	1538	STCa-9830	CATGCTCTGGGAATACAAAAAAAAAA						1.469	0.228	0	75.2
1158	Ca	SS	1539	STCa-9834	CATGCTCTGTTTGTTTAATATTCAAT						1.469	0.228	0	75.2
26413	Ca	SS	1540	STCa-9893	CATGCTGAATGATGGTGCAGCCTTTG						1.469	0.228	0	75.2
21201	Ca	SS	1541	STCa-9912	CATGCTGAGATGGCTCTTCAAACCTC						1.469	0.228	0	75.2
39849	Ca	SS	1543	STCa-9948	CATGCTGATTCTGAGGTTAGTATATC						1.469	0.228	0	75.2
1162	Ca	SS	1545	STCa-10013	CATGCTGGAGAACCGTTCTCTCTTGA						1.469	0.228	0	75.2
1163	Ca	SS	1546	STCa-10019	CATGCTGGAGGCACAGACATTACACA						1.469	0.228	0	75.2
1164	Ca	SS	1547	STCa-10065	CATGCTGTAAATAAAATAATTTTAAT	Q8GSG4_MEDTR	Q8GSG4	0.026	Phosphate transporter PT4	GO:0015293,GO:0005315,GO:0005215,GO:0006817,GO:0006810,GO:0016020,GO:0016021	1.469	0.228	0	75.2
2460	Ca	SS	1549	STCa-10078	CATGCTGTAGGTATCATCGTTTCAAC						1.469	0.228	0	75.2
1166	Ca	SS	1551	STCa-10105	CATGCTGTGGTAGTGGCCCTTACAAA	Q9FLN0_ARATH	Q9FLN0	3e-07	GDSL-motif lipase/hydrolase-like protein	GO:0016298,GO:0016787,GO:0016788,GO:0006629	1.469	0.228	0	75.2
8251	Ca	SS	1553	STCa-10108	CATGCTGTGGTTTTTATGGTTCCTTA						1.469	0.168	34.6	150
1168	Ca	SS	1554	STCa-10167	CATGCTTAAGCTTAATTATTGAGGTT						1.469	0.228	0	75.2
1169	Ca	SS	1555	STCa-10173	CATGCTTAAGTTAGTAGTTCTTGTAT						1.469	0.228	0	75.2
1170	Ca	SS	1556	STCa-10181	CATGCTTAATTATGTAAATGTTATGT						1.469	0.228	0	75.2
1171	Ca	SS	1558	STCa-10209	CATGCTTAGGTTTTTCTTTTCCTTTG						1.469	0.228	0	75.2
1172	Ca	SS	1559	STCa-10210	CATGCTTAGTATGTGTTGAGTTTGCA						1.469	0.228	0	75.2
1173	Ca	SS	1560	STCa-10272	CATGCTTCATTGTTATTAAATAATTG						1.469	0.228	0	75.2
27690	Ca	SS	1561	STCa-10279	CATGCTTCCCTCTATAATTGAGAAAG						1.469	0.228	0	75.2
39819	Ca	SS	1562	STCa-10331	CATGCTTGATTATAGAATTATATGTT						1.469	0.228	0	75.2
1176	Ca	SS	1563	STCa-10339	CATGCTTGCTGAGCCATTGATGCTGG						1.469	0.228	0	75.2
1177	Ca	SS	1564	STCa-10340	CATGCTTGCTTCCTAATTACTAATAT						1.469	0.228	0	75.2
1178	Ca	SS	1566	STCa-10385	CATGCTTGTATGATATATAAATTTGG						1.469	0.228	0	75.2
19171	Ca	SS	1568	STCa-10440	CATGCTTTATTATGGTGTATTTTATG						1.469	0.228	0	75.2
18022	Ca	SS	1569	STCa-10450	CATGCTTTCCCCAGTTCAAATATTGA						1.469	0.228	0	75.2
1181	Ca	SS	1570	STCa-10463	CATGCTTTGAGGAATAAAACATTTTC	ZFNL5_ARATH	Q5RJC5	0.009382	Zinc finger CCCH domain-containing protein ZFN-like 5	GO:0003677,GO:0003676,GO:0008270,GO:0046872,GO:0005634	1.469	0.228	0	75.2
1182	Ca	SS	1571	STCa-10476	CATGCTTTGGTATTGATTGATGCACT						1.469	0.228	0	75.2
1183	Ca	SS	1572	STCa-10535	CATGGAAAAAAAAAAAAAAAAAAATA						1.469	0.228	0	75.2
1184	Ca	SS	1573	STCa-10541	CATGGAAAAAAAAAAAAAAAAACTGC						1.469	0.228	0	75.2
27532	Ca	SS	1574	STCa-10577	CATGGAAAATAGCAAAGTTACACTCC						1.469	0.228	0	75.2
29645	Ca	SS	1575	STCa-10605	CATGGAAACAAGTGCTGTGTCAGCTG	Q67ME0_SYMTH	Q67ME0	2e-05	Polysaccharide deacetylase	GO:0016810,GO:0005975	1.469	0.228	0	75.2
1187	Ca	SS	1579	STCa-10631	CATGGAAAGAAGAAACACCATTTCTT	Q1T0K1_MEDTR	Q1T0K1	5e-07	Probable UDP-glucose,sterol glucosyltransferase [imported]-Arabidopsis thaliana-related	GO:0016758,GO:0016740,GO:0030259,GO:0005975	1.469	0.228	0	75.2
25310	Ca	SS	1582	STCa-10678	CATGGAAATAAGACATCATAAGAACT						1.469	0.228	0	75.2
1189	Ca	SS	1583	STCa-10686	CATGGAAATATTCTTTGATTTGGCAC	Q5ZAW5_ORYSA	Q5ZAW5	2e-05	Breast carcinoma amplified sequence 3-like protein	GO:	1.469	0.228	0	75.2
1190	Ca	SS	1584	STCa-10722	CATGGAAATGTTTTTAGGATTAAGCC	Q1SJ54_MEDTR	Q1SJ54	0.0001	AT4g39690/T19P19_80	GO:	1.469	0.228	0	75.2
25252	Ca	SS	1585	STCa-10783	CATGGAACCATCAATCAAACTAATGC						1.469	0.228	0	75.2
1192	Ca	SS	1586	STCa-10785	CATGGAACCCTTCTTCTACTTCTCAC						1.469	0.228	0	75.2
1193	Ca	SS	1587	STCa-10800	CATGGAACTACAGGCGTGCCGCTGGC						1.469	0.228	0	75.2
1194	Ca	SS	1588	STCa-10827	CATGGAACTTCTACCTTTGTGATTTT						1.469	0.228	0	75.2
1195	Ca	SS	1589	STCa-10934	CATGGAAGGAGAAACAAGTGACAATC						1.469	0.228	0	75.2
1196	Ca	SS	1590	STCa-10969	CATGGAAGTAGTTCAGATTTGAATAT	PLSB_PEA	P30706	1e-06	Glycerol-3-phosphate acyltransferase, chloroplast precursor (EC 2.3.1.15) (GPAT)	GO:0004366,GO:0016740,GO:0008415,GO:0008654,GO:0008152,GO:0009507	1.469	0.228	0	75.2
1197	Ca	SS	1593	STCa-11037	CATGGAATATTGAATTCGAGCAGAAA						1.469	0.228	0	75.2
1198	Ca	SS	1594	STCa-11041	CATGGAATATTTTCTTTGATTTGGCA						1.469	0.228	0	75.2
1199	Ca	SS	1595	STCa-11044	CATGGAATCAATTGGGGAATGGTAAT						1.469	0.228	0	75.2
1200	Ca	SS	1596	STCa-11049	CATGGAATCATAGAGTGAAACTATGA						1.469	0.228	0	75.2
1201	Ca	SS	1598	STCa-11110	CATGGAATGGATGACAAAGTGGTTCC						1.469	0.228	0	75.2
20048	Ca	SS	1599	STCa-11201	CATGGACAAAGAGATATTTGAGAATC						1.469	0.228	0	75.2
16602	Ca	SS	1600	STCa-11415	CATGGACCGTGACAACCCACGACCCC						1.469	0.228	0	75.2
1204	Ca	SS	1601	STCa-11539	CATGGACTAGACTACTTACTTATATG						1.469	0.228	0	75.2
1205	Ca	SS	1605	STCa-11564	CATGGACTATAGATACAAGTATTATA						1.469	0.228	0	75.2
1206	Ca	SS	1606	STCa-11604	CATGGACTGGTTCTTGCTCTAACATA						1.469	0.228	0	75.2
8487	Ca	SS	1607	STCa-11618	CATGGACTTCTTCAAGATGTTGTTCC	Q2PJR6_SOYBN	Q2PJR6	4e-07	WRKY54	GO:0043565,GO:0003700,GO:0045449,GO:0005634	1.469	0.228	0	75.2
1208	Ca	SS	1608	STCa-11619	CATGGACTTCTTCAAGATGTTGTTGC	Q2PJR6_SOYBN	Q2PJR6	7e-06	WRKY54	GO:0043565,GO:0003700,GO:0045449,GO:0005634	1.469	0.228	0	75.2
26335	Ca	SS	1613	STCa-11636	CATGGACTTGTAGTATATTTGAAATT						1.469	0.228	0	75.2
20701	Ca	SS	1615	STCa-11870	CATGGAGGAAAAACTATCGGAAGTGG						1.469	0.168	34.6	150
20814	Ca	SS	1616	STCa-11872	CATGGAGGAAAACTATCGGAAGTGGG						1.469	0.228	0	75.2
1212	Ca	SS	1617	STCa-11968	CATGGAGGTACACAGGGGTGGAGGAG	Q84MZ5_MEDSA	Q84MZ5	0.0001	Galactinol synthase	GO:0016758,GO:0016757,GO:0047216,GO:0016740,GO:0016051	1.469	0.228	0	75.2
1213	Ca	SS	1618	STCa-12052	CATGGAGTGGTTCACTTCTAAGATCC						1.469	0.228	0	75.2
1214	Ca	SS	1619	STCa-12058	CATGGAGTTATATGCAATAATAACAT						1.469	0.228	0	75.2
32133	Ca	SS	1620	STCa-12062	CATGGAGTTCAACACATTTACTTTCT						1.469	0.228	0	75.2
1216	Ca	SS	1622	STCa-12169	CATGGATATAACGTTTCTTTGGGATT						1.469	0.228	0	75.2
1217	Ca	SS	1624	STCa-12175	CATGGATATCCAATAGTTTATACTTC						1.469	0.228	0	75.2
1218	Ca	SS	1625	STCa-12207	CATGGATCAAAGATTGGTTGCTGGAG	TOC75_ORYSA	TOC75	0.002	Protein TOC75, chloroplast precursor; 75 kDa translocon at the outer-envelope-membrane of chloroplasts		1.469	0.168	34.6	150
1219	Ca	SS	1626	STCa-12256	CATGGATCGTGAGTTCGAGCAGAAAC						1.469	0.228	0	75.2
9367	Ca	SS	1627	STCa-12312	CATGGATGAGCTGATGAATAAATATT						1.469	0.228	0	75.2
26871	Ca	SS	1628	STCa-12360	CATGGATGCGGCTTGCGCTTGAAATA						1.469	0.228	0	75.2
19015	Ca	SS	1629	STCa-12380	CATGGATGGCAGCTTCTATCGATGTC	Q93VB2_ARATH	Q93VB2	7e-08	AT3g62770/F26K9_200	GO:	1.469	0.228	0	75.2
1223	Ca	SS	1630	STCa-12569	CATGGATTTTATATAGTTGAGTTATT						1.469	0.228	0	75.2
21413	Ca	SS	1632	STCa-12835	CATGGCATAGCGTGCAAGCAAAATTG						1.469	0.228	0	75.2
1225	Ca	SS	1633	STCa-12862	CATGGCATCGGTCCAAAATTATATGT						1.469	0.228	0	75.2
29047	Ca	SS	1634	STCa-12979	CATGGCCACAGTGATGCAGCTATCAG						1.469	0.228	0	75.2
1227	Ca	SS	1636	STCa-13192	CATGGCGAGGGATTGAATTCGAGCAG						1.469	0.228	0	75.2
1228	Ca	SS	1637	STCa-13369	CATGGCTAGGTTTGTTTCTAAAGATG						1.469	0.228	0	75.2
1229	Ca	SS	1638	STCa-13371	CATGGCTAGTATGGCTGTACACTTAT						1.469	0.228	0	75.2
29390	Ca	SS	1639	STCa-13372	CATGGCTAGTCATTGAAGAAGTTAGA						1.469	0.228	0	75.2
11918	Ca	SS	1640	STCa-13479	CATGGCTGTAATCTGATATTCTAAAG						1.469	0.228	0	75.2	0.674474
1232	Ca	SS	1641	STCa-13481	CATGGCTGTAGGGTGAAATAATGTGC						1.469	0.228	0	75.2
5983	Ca	SS	1642	STCa-13505	CATGGCTTATCATTGTGAATGTTTTA						1.469	0.228	0	75.2
7424	Ca	SS	1645	STCa-13549	CATGGCTTGTGATTAGAACGAGATAG	Q2KN79_FUSOX	Q2KN79	4e-07	Beta-1,3-glucanosyltransferase	GO:0003824,GO:0043169,GO:0016740,GO:0005975	1.469	0.228	0	75.2
630	Ca	SS	1648	STCa-13596	CATGGGAAATACAAAACTTTTGTGCT						1.469	0.228	0	75.2	0.0188218
22825	Ca	SS	1649	STCa-13637	CATGGGAACTATGCTATATATTTTCT						1.469	0.168	34.6	150	0.790728
22967	Ca	SS	1650	STCa-13685	CATGGGAAGGGTACCATTTAATTGAT						1.469	0.228	0	75.2
8596	Ca	SS	1651	STCa-13830	CATGGGAGAAAATAATAGAAAATTGT						1.469	0.228	0	75.2
1239	Ca	SS	1652	STCa-13834	CATGGGAGAAGAACATCTTTCCTCTC	Q9M442_CICAR	Q9M442	4e-07	Putative imbibition protein	GO:	1.469	0.228	0	75.2
1240	Ca	SS	1655	STCa-13904	CATGGGAGGCTCCGTGGGCCGGTGAC						1.469	0.228	0	75.2
14334	Ca	SS	1656	STCa-13910	CATGGGAGGGTATGAATTCGAGCAGA	O65755_CICAR	O65755	0.026	Putative deoxycytidylate deaminase; Putative cytidine deaminase	GO:0016787,GO:0008270	1.469	0.168	34.6	150
3304	Ca	SS	1659	STCa-14008	CATGGGATCTTCTGTTTGTGTCTTTA						1.469	0.228	0	75.2
1243	Ca	SS	1660	STCa-14011	CATGGGATGAAAGATGTATATATAGG						1.469	0.228	0	75.2
1244	Ca	SS	1662	STCa-14013	CATGGGATGACATTCATACAAAAAAA						1.469	0.228	0	75.2
1245	Ca	SS	1663	STCa-14080	CATGGGATTTGTGCTTTTATTTTATC						1.469	0.228	0	75.2
1246	Ca	SS	1664	STCa-14263	CATGGGCCCATTATTGTTATAATTCA						1.469	0.228	0	75.2
1247	Ca	SS	1665	STCa-14269	CATGGGCCGACAGAACGTAAGCTGCA						1.469	0.228	0	75.2
22990	Ca	SS	1666	STCa-14414	CATGGGCTTCAGTTTGTTCGAGCAGA	RLA21_ARATH	RLA21	0.009	60S acidic ribosomal protein P2-1	GO:0003735,GO:0006414,GO:0005622,GO:0005840,GO:0030529	1.469	0.228	0	75.2
3219	Ca	SS	1667	STCa-14481	CATGGGGAAGACAGACGTAAGCTGCA						1.469	0.228	0	75.2
1250	Ca	SS	1669	STCa-14749	CATGGGGCTAATGCCTAATGCTACTT						1.469	0.228	0	75.2
1251	Ca	SS	1670	STCa-14795	CATGGGGGCTAAGTGGAAGAAGAAGC	RL41_ARATH	P62120	4e-05	60S ribosomal protein L41	GO:0003735,GO:0006412,GO:0005840,GO:0030529	1.469	0.228	0	75.2
9887	Ca	SS	1671	STCa-14817	CATGGGGGGTCCGACAGAACGTAAGC						1.469	0.228	0	75.2
1253	Ca	SS	1672	STCa-14823	CATGGGGGGTTCTAATTCCACCACAC						1.469	0.228	0	75.2
1254	Ca	SS	1674	STCa-14842	CATGGGGTACATAATTGTATGTAGAG						1.469	0.168	34.6	150
26667	Ca	SS	1675	STCa-14870	CATGGGGTCCAAAATGTTGTGATGGC						1.469	0.228	0	75.2
1222	Ca	SS	1676	STCa-15032	CATGGGTGAACCCTTGGCTTCTTTTG	ECA1_ARATH	P92939	1e-06	Calcium-transporting ATPase 1, endoplasmic reticulum-type (EC 3.6.3.8)	GO:0003824,GO:0000287,GO:0005524,GO:0000166,GO:0030145,GO:0005509,GO:0016787,GO:0016820,GO:0015662,GO:0005388,GO:0008152,GO:0006810,GO:0006816,GO:0006812,GO:0006811,GO:0016020,GO:0030176,GO:0005783,GO:0016021	1.469	0.228	0	75.2
1260	Ca	SS	1678	STCa-15053	CATGGGTGATACGAAAAAAAAAAAAA						1.469	0.228	0	75.2
17819	Ca	SS	1680	STCa-15055	CATGGGTGATCAATGTTTATGTGTTT						1.469	0.228	0	75.2
1262	Ca	SS	1682	STCa-15056	CATGGGTGATCGAAAAAAAAAAAAAA						1.469	0.228	0	75.2
140	Ca	SS	1683	STCa-15169	CATGGGTTAAAAGTGAATTCGAGCAG						1.469	0.228	0	75.2
1264	Ca	SS	1684	STCa-15236	CATGGGTTATTTTTGCAGTTACTTTT						1.469	0.228	0	75.2
42141	Ca	SS	1685	STCa-15262	CATGGGTTGGTTAGATAAACAATGTT						1.469	0.228	0	75.2
1268	Ca	SS	1686	STCa-15304	CATGGTAAAAAAAAAAAAAAAAAACT						1.469	0.228	0	75.2
33021	Ca	SS	1687	STCa-15343	CATGGTAAATTACGTTCAAGCTTTGT						1.469	0.228	0	75.2
1270	Ca	SS	1689	STCa-15386	CATGGTAATGCAAGCGGATTGTTCTT						1.469	0.228	0	75.2
9951	Ca	SS	1691	STCa-15428	CATGGTACAGTATTGGGTATCTCTAC						1.469	0.228	0	75.2
1274	Ca	SS	1694	STCa-15543	CATGGTATAATTGTGTTTTGGGGCCC						1.469	0.228	0	75.2
1275	Ca	SS	1696	STCa-15574	CATGGTATCTGATTTGTATGGAAGTG	Q9FM19_ARATH	Q9FM19	7e-05	Hypersensitive-induced response protein	GO:	1.469	0.228	0	75.2
1276	Ca	SS	1700	STCa-15592	CATGGTATGCTAGAGAAACTCTATGA						1.469	0.228	0	75.2
1277	Ca	SS	1701	STCa-15663	CATGGTCAACAGTATACTATACATCC						1.469	0.228	0	75.2
1278	Ca	SS	1702	STCa-15671	CATGGTCAAGGAAGAACCTCAACCTC						1.469	0.228	0	75.2
1279	Ca	SS	1703	STCa-15673	CATGGTCAAGTGTGTAACCGCACCAG						1.469	0.228	0	75.2
1280	Ca	SS	1704	STCa-15729	CATGGTCATTACTCGACAACTTTGAA	Q7Y073_HEVBR	Q7Y073	0.002374	Latex cyanogenic beta glucosidase (B-glucosidase)	GO:0003824,GO:0004553,GO:0043169,GO:0005975	1.469	0.228	0	75.2
9952	Ca	SS	1708	STCa-15757	CATGGTCCCCTCAAGCTACCTTGTTC						1.469	0.228	0	75.2
1283	Ca	SS	1710	STCa-15781	CATGGTCGACGAAGAAGTTGTCAGAG						1.469	0.228	0	75.2
1285	Ca	SS	1711	STCa-15797	CATGGTCGGTCTGCTTTGGATTCCTT						1.469	0.228	0	75.2
23867	Ca	SS	1713	STCa-15818	CATGGTCTACAAAATGAGATATTAGC						1.469	0.228	0	75.2
1287	Ca	SS	1714	STCa-15848	CATGGTCTGTAAAATTTATTTTAAAA	Q9FSZ3_CICAR	Q9FSZ3	4e-07	Ubiquitin-conjugating enzyme E2	GO:0004842,GO:0016874,GO:0006512,GO:0006464	1.469	0.228	0	75.2
33115	Ca	SS	1716	STCa-15860	CATGGTCTTGATGGTTTAATTTTTAT						1.469	0.228	0	75.2
1289	Ca	SS	1717	STCa-15881	CATGGTGAAATCAATATAATAAAGAA						1.469	0.228	0	75.2
30435	Ca	SS	1718	STCa-15917	CATGGTGACATTCTGATTAATGGATA	Q6ZHH2_ORYSA	Q6ZHH2	0.008	Tyrosine specific protein phosphatase-like	GO:	1.469	0.228	0	75.2
16216	Ca	SS	1719	STCa-16181	CATGGTGGGCTTGTGAAATGGACCAG						1.469	0.228	0	75.2
25198	Ca	SS	1720	STCa-16203	CATGGTGGTATGTTGTAGCCCTGAGA						1.469	0.228	0	75.2
1297	Ca	SS	1721	STCa-16349	CATGGTGTGTTACTGTGTTTCTCTTC	O65742_CICAR	O65742	7e-06	Hypothetical protein	GO:	1.469	0.228	0	75.2
1298	Ca	SS	1723	STCa-16393	CATGGTGTTTTGGATTTTAAGTTGAA	Q52ZH7_PEA	Q52ZH7	0.008	FPA	GO:	1.469	0.228	0	75.2
1299	Ca	SS	1724	STCa-16494	CATGGTTATAAATAGATGCTTTTAGA	Q9SKU1_ARATH	Q9SKU1	0.004	Expressed protein (At2g20760) (At2g20760/F5H14.27)	GO:0006886,GO:0030125	1.469	0.228	0	75.2
25570	Ca	SS	1725	STCa-16511	CATGGTTATGGTGGAGTCCACTATAG						1.469	0.228	0	75.2
44147	Ca	SS	1728	STCa-16516	CATGGTTATTATAAAAAGTTTCATAC						1.469	0.228	0	75.2
1303	Ca	SS	1729	STCa-16518	CATGGTTATTGAATTCGAGCAGAAAC						1.469	0.228	0	75.2
1305	Ca	SS	1730	STCa-16561	CATGGTTCCTATGGATCAACCAAAAG	Q41691_9FABA	Q41691	0.0001	Serine carboxypeptidase	GO:0004185,GO:0004180,GO:0006508	1.469	0.228	0	75.2
11927	Ca	SS	1731	STCa-16647	CATGGTTGCAAAAATAAAGAATTTGA						1.469	0.228	0	75.2
1307	Ca	SS	1734	STCa-16680	CATGGTTGGAGAAGGCTATTGAATTC						1.469	0.228	0	75.2
26119	Ca	SS	1735	STCa-16731	CATGGTTGTTAATATATCTTTTGAGG						1.469	0.228	0	75.2
1309	Ca	SS	1736	STCa-16739	CATGGTTGTTGAAAACGGAAGAGAAG						1.469	0.228	0	75.2
15032	Ca	SS	1740	STCa-16775	CATGGTTTATGTCATTTTTTATTGTT						1.469	0.228	0	75.2
25982	Ca	SS	1741	STCa-16829	CATGGTTTGTAAATGGTCAAGTGGGA						1.469	0.228	0	75.2
26272	Ca	SS	1743	STCa-16865	CATGGTTTTTCTATCAGATTGAAAGC						1.469	0.228	0	75.2
1313	Ca	SS	1745	STCa-16895	CATGTAAAAAACTACTTATAAATTAG						1.469	0.228	0	75.2
1314	Ca	SS	1747	STCa-16905	CATGTAAAAAGAAGTTTTTAAATGAT						1.469	0.228	0	75.2
1315	Ca	SS	1748	STCa-16917	CATGTAAAACATCAATTAGATGCTTT						1.469	0.228	0	75.2
1317	Ca	SS	1749	STCa-16935	CATGTAAAAGGAACACTTCAACAAAT						1.469	0.228	0	75.2
1318	Ca	SS	1750	STCa-16983	CATGTAAACAACTCTAGAAATATTGT						1.469	0.228	0	75.2
1319	Ca	SS	1751	STCa-17018	CATGTAAAGATCAACAATGACTGGTT	Q9FZC0_ARATH	Q9FZC0	0.002	T1K7.29 protein	GO:	1.469	0.228	0	75.2
1320	Ca	SS	1752	STCa-17048	CATGTAAAGTTGTCTAGTGTAAGCAC						1.469	0.228	0	75.2
38166	Ca	SS	1753	STCa-17051	CATGTAAAGTTTTATTTTAATGTTTT	RBX1A_ARATH	Q940X7	4e-07	RING-box protein 1a (RBX1a-At) (At-Rbx1; 1) (RBX1-2)	GO:0005515,GO:0008270,GO:0046872,GO:0006512,GO:0005634	1.469	0.228	0	75.2
1322	Ca	SS	1754	STCa-17069	CATGTAAATAGAGGTAATTTGTAATG	P93525_SORBI	P93525	2e-05	PSbaNS5 protein	GO:	1.469	0.228	0	75.2
1323	Ca	SS	1755	STCa-17132	CATGTAAATTAATGGTTGAAGGAAAT						1.469	0.228	0	75.2
4572	Ca	SS	1756	STCa-17162	CATGTAAATTTGCATTATGGCTATGT						1.469	0.228	0	75.2
26913	Ca	SS	1757	STCa-17205	CATGTAACATAGAGACATAATAAACA						1.469	0.228	0	75.2
1329	Ca	SS	1758	STCa-17220	CATGTAACATTCCAAAATTTTAGGGC						1.469	0.228	0	75.2
1331	Ca	SS	1759	STCa-17288	CATGTAACTTTAATATTAAACCTATG						1.469	0.228	0	75.2
1332	Ca	SS	1760	STCa-17321	CATGTAAGATATTGTCTTTTGATAGA						1.469	0.228	0	75.2
38375	Ca	SS	1762	STCa-17361	CATGTAAGGCATTGTGAGGATATGAA	FUT1_PEA	FUT1	0.0004	Galactoside 2-alpha-L-fucosyltransferase; Xyloglucan alpha-(1,2)-fucosyltransferase; PsFT1	GO:0016757,GO:0008107,GO:0016740,GO:0042546,GO:0016020,GO:0016021	1.469	0.228	0	75.2
38482	Ca	SS	1763	STCa-17394	CATGTAAGTGTGGGTTTTTATTTATT						1.469	0.228	0	75.2
1336	Ca	SS	1764	STCa-17412	CATGTAATAAAAAAAAAAAAAAAAAA						1.469	0.228	0	75.2
1338	Ca	SS	1765	STCa-17433	CATGTAATAATAAAAAAATAAACAAA						1.469	0.228	0	75.2
1339	Ca	SS	1767	STCa-17475	CATGTAATATGCTGATTTTGGTTGAT						1.469	0.228	0	75.2
1341	Ca	SS	1768	STCa-17590	CATGTAATTAATTTAAGATTAGATTT						1.469	0.228	0	75.2
1342	Ca	SS	1770	STCa-17599	CATGTAATTATGACTCTTTCTCTCTC						1.469	0.228	0	75.2
1344	Ca	SS	1772	STCa-17604	CATGTAATTATTTTGTAAATTTAGAT	STP3_ARATH	Q8L7R8	0.009382	Sugar transport protein 3 (Hexose transporter 3)	GO:0015293,GO:0005215,GO:0005351,GO:0006810,GO:0008643,GO:0016020,GO:0016021	1.469	0.228	0	75.2
28009	Ca	SS	1773	STCa-17658	CATGTAATTTTGAAACCAAGTTTATT						1.469	0.228	0	75.2
28171	Ca	SS	1774	STCa-17670	CATGTACAAAAAAAAAAAAAAAAAAC						1.469	0.228	0	75.2
1349	Ca	SS	1775	STCa-17677	CATGTACAAAACCAATAATTAATAAT						1.469	0.228	0	75.2
1352	Ca	SS	1776	STCa-17808	CATGTACATACATTGGTGTATCATTT						1.469	0.228	0	75.2
28718	Ca	SS	1778	STCa-18034	CATGTACTATATTGTTTTTTTGCTTT						1.469	0.228	0	75.2
1354	Ca	SS	1779	STCa-18138	CATGTAGAAAAAAAAAAAAAAAAAAA						1.469	0.228	0	75.2
28821	Ca	SS	1780	STCa-18176	CATGTAGAAGTTATGGGGGAGGTTTG						1.469	0.228	0	75.2
1356	Ca	SS	1781	STCa-18195	CATGTAGAATTTGAAAAATTAAACAT						1.469	0.228	0	75.2
1357	Ca	SS	1785	STCa-18212	CATGTAGACAGTAGTATATGTGAATA						1.469	0.228	0	75.2
1358	Ca	SS	1786	STCa-18283	CATGTAGATTGAACTCCCTTTGTTTA						1.469	0.228	0	75.2
1359	Ca	SS	1787	STCa-18579	CATGTAGTGTTTTTACATTCTAATAA						1.469	0.228	0	75.2
1361	Ca	SS	1789	STCa-18588	CATGTAGTTATGTTAAGATTTTATCA						1.469	0.228	0	75.2
1362	Ca	SS	1791	STCa-18598	CATGTAGTTGCAGTTCAAATTCATTG	Q9SY27_ARATH	Q9SY27	0.0003	T17H7.13	GO:0030833,GO:0005856	1.469	0.228	0	75.2
1364	Ca	SS	1796	STCa-18622	CATGTATAAAAACTTAGTTTGGCTCA	O65757_CICAR	O65757	0.0004	Putative Pi starvation-induced protein	GO:0042802,GO:0004289,GO:0043086	1.469	0.168	34.6	150
9101	Ca	SS	1797	STCa-18702	CATGTATACGCACTGTAGATTATATT						1.469	0.228	0	75.2
1366	Ca	SS	1798	STCa-18722	CATGTATAGAGAGTTGGTGATTTTGG	Q9FPI4_ARATH	Q9FPI4	3e-07	AT5g16110 (AT5g16110/T21H19_30)	GO:	1.469	0.228	0	75.2
1373	Ca	SS	1799	STCa-18799	CATGTATATGATTTTAGGCCGTTTGG						1.469	0.228	0	75.2
29000	Ca	SS	1800	STCa-18848	CATGTATATTTTGATGCACATTTGTC	Q6WWW4_ARATH	Q6WWW4	0.008	HECT ubiquitin-protein ligase 3; KAKTUS protein	GO:0005488,GO:0004842,GO:0016874,GO:0006512,GO:0006464,GO:0005622	1.469	0.168	34.6	150
1378	Ca	SS	1802	STCa-18870	CATGTATCAATTCATAAAGAGGAATT						1.469	0.228	0	75.2
29489	Ca	SS	1803	STCa-18932	CATGTATCTAAGCTGGTAGTATCAAG	ATP9_VICFA	ATP9	4e-07	ATP synthase protein 9, mitochondrial; Lipid-binding protein	GO:0015078,GO:0046933,GO:0046961,GO:0008289,GO:0006810,GO:0015986,GO:0015992,GO:0006811,GO:0016020,GO:0005739,GO:0016469,GO:0045263,GO:0016021	1.469	0.228	0	75.2
7727	Ca	SS	1804	STCa-18956	CATGTATCTTTGCTACCGTTTCCATC						1.469	0.228	0	75.2
1389	Ca	SS	1806	STCa-19015	CATGTATGATTCATATTATTTTACAG	Q41024_PEA	Q41024	2e-05	Small GTP-binding protein	GO:0005524,GO:0000166,GO:0008134,GO:0005525,GO:0015031,GO:0007264,GO:0006355,GO:0016020,GO:0005622	1.469	0.228	0	75.2
1392	Ca	SS	1807	STCa-19137	CATGTATGTGTAGTTAATTATTAGTT						1.469	0.228	0	75.2
1393	Ca	SS	1808	STCa-19200	CATGTATTATATGATTATAATTATTT	Q9M6B4_VITVI	Q9M6B4	0.009382	Alcohol dehydrogenase 7	GO:0016491,GO:0008270	1.469	0.228	0	75.2
27440	Ca	SS	1809	STCa-19205	CATGTATTATGGTTCTGTGAGTTCAA						1.469	0.228	0	75.2
32812	Ca	SS	1810	STCa-19251	CATGTATTCTTTCTTCACCTAATTAA						1.469	0.228	0	75.2
1398	Ca	SS	1812	STCa-19260	CATGTATTGATAAAAGTTATGATGAT						1.469	0.228	0	75.2
1399	Ca	SS	1813	STCa-19322	CATGTATTTATGGTTGTAACAGAAAA						1.469	0.228	0	75.2
1403	Ca	SS	1814	STCa-19391	CATGTCAAAAAAAAAAAAAAAAAAAC						1.469	0.228	0	75.2
1405	Ca	SS	1817	STCa-19450	CATGTCAACTCATTTGAAACAATGTA						1.469	0.228	0	75.2
1408	Ca	SS	1818	STCa-19451	CATGTCAACTTCAAATTGTTTGGAAC						1.469	0.228	0	75.2
40224	Ca	SS	1819	STCa-19484	CATGTCAATATTGACTTGGATTACCT						1.469	0.228	0	75.2
1413	Ca	SS	1821	STCa-19575	CATGTCAGATACTCCTTAGGTAAAGT						1.469	0.228	0	75.2
1414	Ca	SS	1822	STCa-19928	CATGTCGATAAAATAATAATTGATGT						1.469	0.228	0	75.2
1415	Ca	SS	1823	STCa-20012	CATGTCTAAGTGGCAGGGTTTTGTAT						1.469	0.228	0	75.2	1.51973
1416	Ca	SS	1824	STCa-20071	CATGTCTCAAACGGTTATTACGAAGT						1.469	0.228	0	75.2
1422	Ca	SS	1825	STCa-20102	CATGTCTGAAATTCATCTTCATATAC						1.469	0.228	0	75.2
1424	Ca	SS	1826	STCa-20104	CATGTCTGAATCTCATTTTGTATATT						1.469	0.228	0	75.2
13674	Ca	SS	1827	STCa-20197	CATGTCTTCTGGTATTGCAATGTATT						1.469	0.228	0	75.2
31963	Ca	SS	1828	STCa-20223	CATGTCTTGTGTGGAAAAATGCAACT						1.469	0.228	0	75.2
1427	Ca	SS	1829	STCa-20225	CATGTCTTTAACCAAACTCTTGAAAT	Q9SMK5_CICAR	Q9SMK5	0.009382	Plasma membrane intrinsic polypeptide	GO:	1.469	0.228	0	75.2
1429	Ca	SS	1832	STCa-20228	CATGTCTTTATCTAGCTTTATTCTTG						1.469	0.228	0	75.2
25290	Ca	SS	1833	STCa-20230	CATGTCTTTATTATATTCGTAGTGAT						1.469	0.228	0	75.2
1431	Ca	SS	1834	STCa-20270	CATGTGAAAAAAAAAAAAAAAAAAAA						1.469	0.228	0	75.2
1434	Ca	SS	1835	STCa-20324	CATGTGAAATGTTACATTGAATTTAT						1.469	0.228	0	75.2
41382	Ca	SS	1836	STCa-20434	CATGTGAATGTCACAAGGTTAATTGT						1.469	0.228	0	75.2
32229	Ca	SS	1837	STCa-20637	CATGTGATCCTTGTTTATCTGCTATT						1.469	0.228	0	75.2
1437	Ca	SS	1839	STCa-20679	CATGTGATGTGAGCAACAAATGTGTG						1.469	0.228	0	75.2
32893	Ca	SS	1842	STCa-20705	CATGTGATTAGATTTCTTTGTTTGCA						1.469	0.228	0	75.2
1439	Ca	SS	1843	STCa-20817	CATGTGCATCATTCACATCGGATAAG						1.469	0.228	0	75.2
1440	Ca	SS	1845	STCa-20885	CATGTGCTACCAGTTAACTTAGGCCC						1.469	0.228	0	75.2
1445	Ca	SS	1846	STCa-21022	CATGTGGACATTATGTTCGAGCAGAA						1.469	0.228	0	75.2
1446	Ca	SS	1849	STCa-21098	CATGTGGATTAGTTCGATTTCTGTAC	SYFA_ARATH	Q9T034	0.002374	Probable phenylalanyl-tRNA synthetase alpha chain (EC 6.1.1.20) (Phenylalanine--tRNA ligase alpha chain) (PheRS)	GO:0004826,GO:0004812,GO:0005524,GO:0000166,GO:0016874,GO:0006432,GO:0006418,GO:0006412,GO:0005737	1.469	0.228	0	75.2	0.435671
14911	Ca	SS	1850	STCa-21139	CATGTGGCAGTGAGTATTTGAAAAAA						1.469	0.228	0	75.2
1450	Ca	SS	1852	STCa-21142	CATGTGGCAGTGAGTATTTGAATTTG						1.469	0.228	0	75.2
33673	Ca	SS	1853	STCa-21171	CATGTGGCTAATATGGTCGCTGGTAG						1.469	0.228	0	75.2
1454	Ca	SS	1854	STCa-21270	CATGTGGGGTTCCATTCCAGCTTCAG						1.469	0.228	0	75.2
33802	Ca	SS	1855	STCa-21414	CATGTGGTTGTAACATTCTCAATGTG	Q8GTY4_MEDSA	Q8GTY4	0.007	Rubisco activase	GO:0005524,GO:0000166	1.469	0.228	0	75.2	-0.539568
36389	Ca	SS	1856	STCa-21474	CATGTGTAAGCAAATATAAGCTAATA						1.469	0.228	0	75.2
1462	Ca	SS	1857	STCa-21647	CATGTGTCAGGGAGGTGACGCTCGGA	Q708X2_CICAR	Q708X2	0.007	Cyclophilin-type peptidyl-prolyl cis-trans isomerase	GO:0003755,GO:0016853,GO:0006457	1.469	0.228	0	75.2
1463	Ca	SS	1858	STCa-21694	CATGTGTCTGGTCACTCGCTTTCAGT	Q6S7B0_ARATH	Q6S7B0	2e-05	TAF5	GO:0030528,GO:0045449,GO:0005634	1.469	0.228	0	75.2
1464	Ca	SS	1860	STCa-21730	CATGTGTGACTGCGAAGATTAATGTT						1.469	0.228	0	75.2
42730	Ca	SS	1863	STCa-21793	CATGTGTGCGATGAGTCTCGTAATTT						1.469	0.228	0	75.2
1467	Ca	SS	1864	STCa-21799	CATGTGTGCGTAAATATTTTACAGCA						1.469	0.228	0	75.2
35629	Ca	SS	1866	STCa-21819	CATGTGTGGCTGGACTTAATGGACCT						1.469	0.228	0	75.2
4596	Ca	SS	1867	STCa-22025	CATGTGTTGCTCATAACTTTTCGTTC						1.469	0.228	0	75.2
36083	Ca	SS	1868	STCa-22051	CATGTGTTGTGTTGTTCCTTATTGTT						1.469	0.228	0	75.2
1474	Ca	SS	1871	STCa-22056	CATGTGTTGTTCCCGTGTAATATAAG						1.469	0.228	0	75.2
1475	Ca	SS	1872	STCa-22075	CATGTGTTTCATATGTTTAAACCAAC	Q8VZG3_ARATH	Q8VZG3	2e-05	AT3g48690/T8P19_200	GO:	1.469	0.228	0	75.2
33841	Ca	SS	1873	STCa-22108	CATGTTAAAAAAAAAAAAAAAAAAAA						1.469	0.228	0	75.2
1478	Ca	SS	1875	STCa-22183	CATGTTAACATCTTAATGAATATGGA						1.469	0.228	0	75.2
36475	Ca	SS	1878	STCa-22185	CATGTTAACATTTGGATTTATGAGAT						1.469	0.228	0	75.2
1480	Ca	SS	1879	STCa-22283	CATGTTAATTAATCAATGGTGGTGTG	Q9XHP4_SOYBN	Q9XHP4	0.004	Peroxisomal copper-containing amine oxidase	GO:5507	1.469	0.228	0	75.2
1482	Ca	SS	1880	STCa-22298	CATGTTAATTTGTGTGATTTACATTT						1.469	0.228	0	75.2
43954	Ca	SS	1881	STCa-22304	CATGTTAATTTTGTTCTTGTAGAAGA	PLAS_PEA	PLAS	0.0001	Plastocyanin, chloroplast precursor	GO:0009055,GO:0005507,GO:0046872,GO:0006118,GO:0006810,GO:0016020,GO:0009507,GO:0009579	1.469	0.228	0	75.2	0.206201
36550	Ca	SS	1884	STCa-22387	CATGTTACTTAATTTTGATAGATGGT	Q8LPJ4_ARATH	Q8LPJ4	0.002374	RNase L inhibitor-like protein	GO:0009055,GO:0005524,GO:0005506,GO:0000166,GO:0017111,GO:0016887,GO:0006118,GO:0006457	1.469	0.228	0	75.2	0.628075
1487	Ca	SS	1885	STCa-22500	CATGTTATAACCTGTTGGTGTGTTTC						1.469	0.228	0	75.2
36906	Ca	SS	1888	STCa-22530	CATGTTATCCCAGATTTGATTATGGA	Q8L5Q4_CICAR	Q8L5Q4	0.0001	Putative adenosine kinase	GO:0016301,GO:0016740,GO:0004001,GO:0006166	1.469	0.228	0	75.2
1489	Ca	SS	1890	STCa-22605	CATGTTATGGTTTTGGTTACTGTGGT						1.469	0.168	34.6	150
1490	Ca	SS	1892	STCa-22634	CATGTTATTACATTCATAATTTTATA	Q8GUJ1_ARATH	Q8GUJ1	0.001	Putative integral membrane protein (At2g30460)	GO:	1.469	0.228	0	75.2
1491	Ca	SS	1893	STCa-22682	CATGTTATTTCTAACCAGAAAGTGTG						1.469	0.228	0	75.2
27779	Ca	SS	1894	STCa-22729	CATGTTCAACTAGGCAAAAAAATATT						1.469	0.228	0	75.2
37922	Ca	SS	1895	STCa-22733	CATGTTCAAGACTGCCCCAAATGTAG						1.469	0.228	0	75.2
1494	Ca	SS	1896	STCa-22748	CATGTTCAATTTTTGTCAGACCCCTC						1.469	0.228	0	75.2
1495	Ca	SS	1898	STCa-22818	CATGTTCATAAATGTATGGTATGGTT						1.469	0.228	0	75.2
1496	Ca	SS	1900	STCa-22841	CATGTTCATTCATTCATTATACAAAC						1.469	0.228	0	75.2
3564	Ca	SS	1903	STCa-22847	CATGTTCATTTATGTCAAATGCATAC						1.469	0.228	0	75.2
27647	Ca	SS	1904	STCa-22848	CATGTTCATTTTACTTTGGAACTACT						1.469	0.228	0	75.2
12159	Ca	SS	1905	STCa-22908	CATGTTCCTTTCCCCAAATTTCGTTT	Q9FMV3_ARATH	Q9FMV3	0.008	Emb|CAB86899.1	GO:	1.469	0.228	0	75.2
6693	Ca	SS	1906	STCa-23041	CATGTTCTTGCCGTTTATTTTGTTTT						1.469	0.228	0	75.2
1501	Ca	SS	1907	STCa-23042	CATGTTCTTGGGAAGTCAAAAAAAAA						1.469	0.228	0	75.2
15097	Ca	SS	1908	STCa-23077	CATGTTGAACAATTTATTGGATGAGA						1.469	0.168	34.6	150
1503	Ca	SS	1910	STCa-23096	CATGTTGAAGGTCCTTTTCTTTCTTT	Q8VZD3_ARATH	Q8VZD3	0.009	At1g73170/T18K17_17	GO:0005524,GO:0000166,GO:0017111,GO:0004176,GO:0004252,GO:0006508	1.469	0.228	0	75.2
33506	Ca	SS	1911	STCa-23119	CATGTTGAATGGACTTCCATACTTTA						1.469	0.228	0	75.2
1506	Ca	SS	1913	STCa-23191	CATGTTGAGTAGCGAAAATGCTTTAC						1.469	0.0325	69.2	301
1507	Ca	SS	1914	STCa-23201	CATGTTGAGTTAAATAAATATATTCT						1.469	0.228	0	75.2
1508	Ca	SS	1916	STCa-23203	CATGTTGAGTTCGGTATCTTATTTTA						1.469	0.228	0	75.2
42545	Ca	SS	1917	STCa-23207	CATGTTGATAACTTGCACGGCTATTG	Q6XAF4_PEA	Q6XAF4	0.002	Ent-kaurene oxidase	GO:0004497,GO:0005506,GO:0016491,GO:0020037,GO:0046872,GO:0006118,GO:0016020,GO:0005783	1.469	0.00692	104	451	0.640801
1510	Ca	SS	1918	STCa-23210	CATGTTGATACCTAAGATTGTGTCCG						1.469	0.228	0	75.2
31360	Ca	SS	1919	STCa-23243	CATGTTGATGTAATGTTAATAGCCAT	Q8SAE5_MEDTR	Q8SAE5	0.004	Ankyrin-kinase	GO:0004713,GO:0004672,GO:0016301,GO:0016740,GO:0005524,GO:0000166,GO:0004674,GO:0006468	1.469	0.228	0	75.2
1512	Ca	SS	1921	STCa-23260	CATGTTGATTATTATTGTTAAAAACA						1.469	0.228	0	75.2
37973	Ca	SS	1922	STCa-23315	CATGTTGCGATTGAGTCTAAAAGGAG						1.469	0.228	0	75.2
35442	Ca	SS	1923	STCa-23350	CATGTTGCTTATACACAATATAATTG						1.469	0.228	0	75.2
1515	Ca	SS	1924	STCa-23373	CATGTTGGAACTCTTTGTTGTAATGC						1.469	0.168	34.6	150
1518	Ca	SS	1925	STCa-23406	CATGTTGGATGAAGACCCAGCCCTAA	DRP1C_ARATH	Q8LF21	0.002374	Dynamin-related protein 1C (Dynamin-like protein C) (Dynamin-like protein 5) (Dynamin-like protein DLP1)	GO:0003774,GO:0003924,GO:0000166,GO:0016787,GO:0005525,GO:0051301,GO:0007049,GO:0005874	1.469	0.228	0	75.2
1519	Ca	SS	1926	STCa-23462	CATGTTGGTAGGTGAAACTGTTGGTA	Q9FZ23_ARATH	Q9FZ23	0.009	T6A9.7 protein	GO:	1.469	0.228	0	75.2
1522	Ca	SS	1927	STCa-23514	CATGTTGGTTTCTTTAGGGAAATGTG						1.469	0.228	0	75.2
1523	Ca	SS	1928	STCa-23522	CATGTTGTAAACTAATAAAAAAAAAA						1.469	0.228	0	75.2
1524	Ca	SS	1929	STCa-23574	CATGTTGTATGCTCAGCTACAAATAA						1.469	0.228	0	75.2
1526	Ca	SS	1930	STCa-23681	CATGTTGTTATTGTTATTATTATTAT	Q9LN13_ARATH	Q9LN13	0.0003	T6D22.2	GO:0003924,GO:0000166,GO:0003746,GO:0005525,GO:0006412,GO:0006414,GO:0005737	1.469	0.228	0	75.2
1527	Ca	SS	1933	STCa-23701	CATGTTGTTGTAATCATTGGAATGTT	Q6K962_ORYSA	Q6K962	0.008	PRLI-interacting factor A-like	GO:	1.469	0.228	0	75.2
1528	Ca	SS	1934	STCa-23722	CATGTTTAACCAGGCGTTTAGTCGAG						1.469	0.168	34.6	150	-1.21402
1529	Ca	SS	1935	STCa-23732	CATGTTTAAGGAATTGTTATATGTAA						1.469	0.228	0	75.2
39758	Ca	SS	1937	STCa-23747	CATGTTTAATTAAACTCCATTTCAGT						1.469	0.168	34.6	150
39762	Ca	SS	1938	STCa-23787	CATGTTTAGAAAAAAAAAAAAAAAAT						1.469	0.228	0	75.2
39896	Ca	SS	1939	STCa-23797	CATGTTTAGCATTTTCAAGTTTCTGG						1.469	0.228	0	75.2
40087	Ca	SS	1940	STCa-23805	CATGTTTAGGGAGAGATATTGCTTGT						1.469	0.228	0	75.2
1537	Ca	SS	1941	STCa-23847	CATGTTTATCCATTTGTTTGTTTATT	Q8GZT8_ARATH	Q8GZT8	0.002	PTEN-like protein	GO:0016787,GO:0004721,GO:0006470	1.469	0.228	0	75.2
1539	Ca	SS	1943	STCa-23855	CATGTTTATGCTGTAATACTCTCATA						1.469	0.228	0	75.2
40572	Ca	SS	1944	STCa-23913	CATGTTTCAGCATTCCATTTCTTTGG						1.469	0.228	0	75.2
41041	Ca	SS	1945	STCa-23936	CATGTTTCATTTGTCATTCCAAATCT						1.469	0.228	0	75.2
1543	Ca	SS	1947	STCa-23959	CATGTTTCTACTTCAAGAAATAAAAT	Q9SNJ7_ORYSA	Q9SNJ7	0.004	ESTs AU078175(C51476)	GO:0008137,GO:0003954,GO:0006118,GO:0005739	1.469	0.228	0	75.2	0.697139
1545	Ca	SS	1948	STCa-23977	CATGTTTCTGTTTCAAGTCTTTATAG						1.469	0.228	0	75.2
1547	Ca	SS	1954	STCa-23989	CATGTTTGAAAAAAAAAAAAAAAAAA						1.469	0.228	0	75.2
1548	Ca	SS	1958	STCa-23990	CATGTTTGAAAAAAAAAAAAAAAAAT						1.469	0.228	0	75.2
41424	Ca	SS	1960	STCa-24023	CATGTTTGAGAGAAAGTTTTGTGACG						1.469	0.228	0	75.2
1550	Ca	SS	1962	STCa-24089	CATGTTTGCTTGGTTGCTGTGTTGTG						1.469	0.228	0	75.2
1551	Ca	SS	1963	STCa-24095	CATGTTTGGAACATATATTTTATATG						1.469	0.228	0	75.2
1552	Ca	SS	1964	STCa-24151	CATGTTTGTAGGTTCTATGTGTATTC						1.469	0.228	0	75.2
1554	Ca	SS	1965	STCa-24153	CATGTTTGTAGTTTTGAGTTTGAACA						1.469	0.228	0	75.2
1555	Ca	SS	1966	STCa-24156	CATGTTTGTATATGGTGTCAATTGAT	Q9LUC0_ARATH	Q9LUC0	0.0006	Gb|AAD10662.1	GO:	1.469	0.228	0	75.2
1556	Ca	SS	1970	STCa-24174	CATGTTTGTGCAATGAAAGTTTTTTT						1.469	0.228	0	75.2
1557	Ca	SS	1971	STCa-24178	CATGTTTGTGGACTTTTGTTCTTTTG	PMGI_MESCR	Q42908	0.009382	2,3-bisphosphoglycerate-independent phosphoglycerate mutase (EC 5.4.2.1) (Phosphoglyceromutase) (BPG-independent PGAM) (PGAM-I)	GO:0003824,GO:0030145,GO:0016853,GO:0004619,GO:0046872,GO:0006096,GO:0008152,GO:0006007,GO:0005737	1.469	0.0325	69.2	301	0.552159
1558	Ca	SS	1973	STCa-24252	CATGTTTTAGGAGATTTTTTACTTAA						1.469	0.228	0	75.2
36973	Ca	SS	1974	STCa-24260	CATGTTTTATATCTTAATTAAGAACT						1.469	0.228	0	75.2
41566	Ca	SS	1975	STCa-24261	CATGTTTTATATGAATAATGTAACTT						1.469	0.228	0	75.2
1561	Ca	SS	1976	STCa-24316	CATGTTTTCTCCCAATTTTTTCGTTT	O82432_MALDO	O82432	0.009	Leucine-rich receptor-like protein kinase (RLK)	GO:0004672,GO:0005496,GO:0005524,GO:0000166,GO:0004872,GO:0004674,GO:0005515,GO:0016301,GO:0008289,GO:0016740,GO:0006468,GO:0016020,GO:0016021	1.469	0.228	0	75.2
1562	Ca	SS	1983	STCa-24325	CATGTTTTCTTTCAATTTTGAAAGCA	Q8LPE5_CICAR	Q8LPE5	4e-07	Fructokinase-like protein	GO:16301	1.469	0.228	0	75.2
1563	Ca	SS	1984	STCa-24382	CATGTTTTGGTGGATATTGGACCTAT						1.469	0.228	0	75.2
1564	Ca	SS	1987	STCa-24414	CATGTTTTTATAGCTTAGTAATAAAA						1.469	0.228	0	75.2
1565	Ca	SS	1990	STCa-24432	CATGTTTTTGATCGAGTTTTCTGATT						1.469	0.228	0	75.2
1566	Ca	SS	1991	STCa-7821	CATGCATATTTGCTTATGTTGTTTCT	Q8L6V6_CICAR	Q8L6V6	4e-07	Putative ripening related protein	GO:0009607,GO:0006952	1.428	2.22045e-15	865	3610
26666	Ca	SS	1992	STCa-17166	CATGTAAATTTGGCATTGTGATAGAT						1.427	0.00961	104	432
1569	Ca	SS	1993	STCa-22292	CATGTTAATTGTGTTTAATTGTTTTG						1.427	0.00961	104	432	0.31627
25287	Ca	SS	1996	STCa-10441	CATGCTTTATTTGTTGTTAAGATGAT						1.405	0.0454	69.2	282	-1.1457
33049	Ca	SS	1997	STCa-24237	CATGTTTTAATTGATATCTGTGTTTA	Q1SJ54_MEDTR	Q1SJ54	5e-07	AT4g39690/T19P19_80	GO:	1.405	0.0454	69.2	282	0.580538
1572	Ca	SS	1998	STCa-24342	CATGTTTTGATACATTATTAATGGTT						1.405	0.0454	69.2	282
14341	Ca	SS	1999	STCa-19748	CATGTCCAATTTCAACGCAACCGTAT						1.391	0.000925	173	696
1576	Ca	SS	2000	STCa-2085	CATGAATTAGAATATCATAAGTGTAA	O81930_CICAR	O81930	4e-07	Cysteine proteinase	GO:0008233,GO:0004197,GO:0016787,GO:0008234,GO:0006508	1.385	4.27e-10	588	2350
34256	Ca	SS	2002	STCa-160	CATGAAAAGTGATGCAAACTTGTTAT						1.336	0.237	34.6	132
42110	Ca	SS	2004	STCa-577	CATGAAATCAAAGGTGTTTTAACAAG	FABG_CUPLA	P28643	7e-08	3-oxoacyl-[acyl-carrier-protein] reductase, chloroplast precursor (EC 1.1.1.100) (3-ketoacyl-acyl carrier protein reductase)	GO:0016491,GO:0004316,GO:0051287,GO:0008610,GO:0008152,GO:0006633,GO:0009507	1.336	0.237	34.6	132
1579	Ca	SS	2005	STCa-1714	CATGAATAGAAATTAAGTGTGTTTGG						1.336	0.237	34.6	132
1580	Ca	SS	2006	STCa-2199	CATGAATTTGTGGTTAATTGAACTAC						1.336	0.237	34.6	132
1581	Ca	SS	2007	STCa-2678	CATGACCTCAGAATACAATATTAAAT						1.336	0.237	34.6	132	-0.517515
42170	Ca	SS	2008	STCa-2941	CATGACTTATATTTGAAATTACGGTT						1.336	0.237	34.6	132
1584	Ca	SS	2012	STCa-3052	CATGAGAACCGAGTGTGTGAAAGAAA						1.336	0.237	34.6	132
1586	Ca	SS	2014	STCa-3093	CATGAGAATATGTTGCACCGGCAAAA						1.336	0.237	34.6	132
1587	Ca	SS	2015	STCa-4528	CATGATCAAAGGGCTTATTCAGGCTA	Q9SML2_CICAR	Q9SML2	4e-07	Cytochrome P450 monooxygenase	GO:0004497,GO:0005506,GO:0016491,GO:0020037,GO:0046872,GO:0006118	1.336	0.237	34.6	132	0.783445
1588	Ca	SS	2016	STCa-4764	CATGATCTTATTGAGCTTGGTAATTA						1.336	0.237	34.6	132
42914	Ca	SS	2017	STCa-6421	CATGCAACTTTTGGTGCTTGTCATCG						1.336	0.237	34.6	132
1590	Ca	SS	2018	STCa-7414	CATGCAGGATTTGAAAAACAGGGGTG						1.336	0.237	34.6	132
1591	Ca	SS	2020	STCa-8659	CATGCCGCAACACAACAAAAGGATGG						1.336	0.237	34.6	132
39142	Ca	SS	2021	STCa-8812	CATGCCTGATTGGTTCCAGAAGCAAG	NPM2_HUMAN	Q86SE8	4e-06	Nucleoplasmin-2	GO:0042393,GO:0003676,GO:0009790,GO:0007096,GO:0006338,GO:0045836,GO:0009994,GO:0007338,GO:0000789,GO:0000790,GO:0005634	1.336	0.237	34.6	132
1593	Ca	SS	2022	STCa-9030	CATGCGAGGGATAAGAAGAAGGATTC	O24292_PEA	O24292	0.004	CP12 precursor	GO:	1.336	0.0631	69.2	263
39144	Ca	SS	2023	STCa-9059	CATGCGATTCTGCAAGGGAAGAACCT						1.336	0.0631	69.2	263	0.404798
1595	Ca	SS	2024	STCa-9093	CATGCGCCGTGGTGCTTGTGCGACGG						1.336	0.237	34.6	132
1596	Ca	SS	2025	STCa-9163	CATGCGGCACCAGAGAGGGATTTAGA	STXB4_MOUSE	Q9WV89	2e-05	Syntaxin-binding protein 4 (Syntaxin 4-interacting protein) (STX4- interacting protein) (Synip)	GO:0005515,GO:0008286,GO:0006605,GO:0015758,GO:0007242	1.336	0.237	34.6	132
1597	Ca	SS	2026	STCa-9301	CATGCGTGAATTTCGCTCAGGCTCTT						1.336	0.237	34.6	132
1598	Ca	SS	2027	STCa-10163	CATGCTTAACGAAATGATGGTGTCAG						1.336	0.237	34.6	132
1599	Ca	SS	2028	STCa-10244	CATGCTTATTGATTATGTATGTGATA						1.336	0.237	34.6	132
1600	Ca	SS	2029	STCa-10474	CATGCTTTGGAATGCTGTGATCTTTG	Q9M4R0_AVIMR	Q9M4R0	2e-05	Ubiquitin conjugating protein	GO:0004842,GO:0016874,GO:0006512,GO:0006464	1.336	0.237	34.6	132
1601	Ca	SS	2031	STCa-10898	CATGGAAGATTACATCTATATTATAC						1.336	0.237	34.6	132
1602	Ca	SS	2032	STCa-11003	CATGGAATAAAGCCTATCGAACTATT						1.336	0.237	34.6	132
1603	Ca	SS	2034	STCa-12335	CATGGATGATGATGGTGTCTCTTATT						1.336	0.237	34.6	132
1604	Ca	SS	2035	STCa-12502	CATGGATTGAGGAGCTGAACAAGATT	Q76KW1_PEA	Q76KW1	0.0001	Glutathione S-transferase	GO:16740	1.336	0.237	34.6	132	0.41871
43184	Ca	SS	2037	STCa-13688	CATGGGAAGGTGATTGTTTTGGACTA	Q96424_GLYEC	Q96424	0.001	O-methyltransferase	GO:0008171,GO:0008168,GO:0016740,GO:0009809	1.336	0.237	34.6	132	0.97795
43241	Ca	SS	2038	STCa-15716	CATGGTCATAATTGGGTGTACTGATT						1.336	0.237	34.6	132
43263	Ca	SS	2041	STCa-15918	CATGGTGACATTGGTGTAAGTGGAGG						1.336	0.237	34.6	132	0.905432
1608	Ca	SS	2042	STCa-16230	CATGGTGGTGGTGAGGGTAAGAGTAA						1.336	0.237	34.6	132
39145	Ca	SS	2044	STCa-16232	CATGGTGGTGTAATTGGATATGCATT						1.336	0.237	34.6	132
1610	Ca	SS	2045	STCa-16926	CATGTAAAACTGTAAAGTAATATGGT						1.336	0.237	34.6	132
1611	Ca	SS	2046	STCa-17812	CATGTACATACTTATATTGAAACTAG						1.336	0.237	34.6	132
1612	Ca	SS	2048	STCa-18365	CATGTAGCCATCAATAAATGTTGTTC	O65749_CICAR	O65749	4e-07	Copper amine oxidase precursor	GO:0016491,GO:0005507,GO:0008131	1.336	0.237	34.6	132
1613	Ca	SS	2049	STCa-19211	CATGTATTATTCATCCTTTCTTTTGG						1.336	0.237	34.6	132	0.514021
1614	Ca	SS	2050	STCa-19290	CATGTATTGTCTATGTGGTTCGGTTC	Q8L5G0_CICAR	Q8L5G0	0.0001	Tonoplast intrinsic protein	GO:0005215,GO:0006810,GO:0016020,GO:0016021	1.336	0.237	34.6	132
1615	Ca	SS	2051	STCa-19626	CATGTCATAATATACTATGAAGTCTT						1.336	0.0631	69.2	263
43279	Ca	SS	2053	STCa-19644	CATGTCATATGTTCAATATATATATA	Q9FJM4_ARATH	Q9FJM4	0.0003	Emb|CAB79781.1	GO:	1.336	0.237	34.6	132
1617	Ca	SS	2054	STCa-19661	CATGTCATCCTCATTCGAATAACTAG						1.336	0.237	34.6	132
1618	Ca	SS	2055	STCa-19765	CATGTCCAGAGAGGGACAACTGCACT	SY132_ARATH	Q8VZU2	7e-08	Syntaxin-132 (AtSYP132)	GO:0008565,GO:0015031,GO:0006810,GO:0006886,GO:0016020,GO:0016021	1.336	0.237	34.6	132
43638	Ca	SS	2056	STCa-20288	CATGTGAAAATCTCAGCTATGCAATC	Q9M3H9_CICAR	Q9M3H9	4e-07	Tubby-like protein	GO:	1.336	0.237	34.6	132
1620	Ca	SS	2059	STCa-20577	CATGTGAGGTTAAAATATTTGTATTA						1.336	0.0184	104	395	1.18479
1621	Ca	SS	2060	STCa-20729	CATGTGATTTGTAATATATAGTATTA						1.336	0.237	34.6	132
11204	Ca	SS	2063	STCa-21802	CATGTGTGCTTCAATCTTCTTTCCCT						1.336	0.237	34.6	132
1623	Ca	SS	2064	STCa-22048	CATGTGTTGTGAAGCATTCTATTTCC						1.336	0.237	34.6	132
43671	Ca	SS	2065	STCa-22604	CATGTTATGGTTTGTGTTACTGTGGT						1.336	0.237	34.6	132
39401	Ca	SS	2067	STCa-22708	CATGTTCAAACAATTGATAATGTTAG						1.336	0.0184	104	395
1626	Ca	SS	2069	STCa-22865	CATGTTCCAGTTTTCAACTACGAATA						1.336	0.0631	69.2	263	0.14842
24178	Ca	SS	2071	STCa-22950	CATGTTCTATAACAATATACTTTGAT						1.336	0.0631	69.2	263
1628	Ca	SS	2073	STCa-23533	CATGTTGTAAGATTATTACATTAAAT						1.336	0.237	34.6	132
1629	Ca	SS	2074	STCa-24093	CATGTTTGCTTTAAGTATGTATATAT						1.336	0.237	34.6	132
1630	Ca	SS	2075	STCa-16453	CATGGTTACTATTAACCCAGCAATGG	O04391_EUCGU	O04391	3e-07	Cinnamyl alcohol dehydrogenase	GO:0003824,GO:0050662,GO:0044237	1.299	0.00764	138	508	-1.48722
29388	Ca	SS	2076	STCa-7181	CATGCACTTTCAGTTCAGTGTTTTAT						1.287	4.65e-05	311	1130	0.0158733
1632	Ca	SS	2077	STCa-8084	CATGCATTTGTAACTTCACTCTTCAT						1.287	2.23e-06	415	1500
1633	Ca	SS	2078	STCa-16439	CATGGTTACCAAAGACGGGTGTGCCT						1.287	0.0252	104	376
1634	Ca	SS	2079	STCa-4735	CATGATCTCTAACTCTACCAGTGTTG	Q6Y1F1_TRIRP	Q6Y1F1	4e-07	Alpha-tubulin	GO:0003924,GO:0000166,GO:0005198,GO:0005525,GO:0051258,GO:0007017,GO:0007018,GO:0043234,GO:0005874	1.262	0.0872	69.2	244	-0.701179
1635	Ca	SS	2080	STCa-7912	CATGCATCTTGCCAATGTCAAACTAT						1.262	0.0872	69.2	244	-1.3548
1636	Ca	SS	2081	STCa-9149	CATGCGGATAGTGAAAGACAGATGTT	O64897_ARATH	O64897	2e-05	Trehalose-6-phosphate phosphatase	GO:0003824,GO:0008152,GO:0005992	1.262	0.0872	69.2	244
1637	Ca	SS	2082	STCa-12309	CATGGATGAGATGCCAAAATTCTTGG	Q9FMJ2_ARATH	Q9FMJ2	2e-05	Ankyrin-like protein	GO:	1.262	0.0872	69.2	244	0.989169
1638	Ca	SS	2084	STCa-15333	CATGGTAAAGGAAGATCAAATATCGT						1.262	0.0872	69.2	244
31856	Ca	SS	2085	STCa-17106	CATGTAAATCTTTGAACTTGAAGTGA	TCMO_SOYBN	TCMO	0.002	Trans-cinnamate 4-monooxygenase; Cytochrome P450 73; CA4H; C4H; P450C4H; Cinnamic acid 4-hydroxylase	GO:0004497,GO:0005506,GO:0016491,GO:0020037,GO:0016710,GO:0046872,GO:0006118	1.262	0.00139	208	733
3163	Ca	SS	2086	STCa-21350	CATGTGGTCTCATCATCTTCAAAGCG						1.262	0.0872	69.2	244
1641	Ca	SS	2087	STCa-22608	CATGTTATGGTTTTGTGTTACTGTGG						1.262	1.11e-12	969	3420	1.17712
36453	Ca	SS	2092	STCa-24330	CATGTTTTGAAGTCTAATATAGAGTT						1.262	0.0872	69.2	244
1643	Ca	SS	2093	STCa-2050	CATGAATGTTTGTTCCTAAGATATTA	Q8L5Q2_CICAR	Q8L5Q2	4e-07	Putative cytochrome P450 monooxygenase	GO:0004497,GO:0005506,GO:0016491,GO:0050381,GO:0020037,GO:0046872,GO:0006118	1.236	0.0345	104	357
1644	Ca	SS	2094	STCa-8665	CATGCCGCGGTGAATATGTACCCGGG						1.236	0.0345	104	357
1645	Ca	SS	2097	STCa-10582	CATGGAAAATCTATTGCACAAATCTC						1.236	0.0345	104	357	0.478716
1646	Ca	SS	2098	STCa-19705	CATGTCATTTCTATCCACAAATTAAT	O65760_CICAR	O65760	2e-06	Extensin	GO:0005199,GO:0009664	1.236	0.0345	104	357
1647	Ca	SS	2100	STCa-22174	CATGTTAAATTCAGTGATAATGTTAT	O65761_CICAR	O65761	4e-07	Beta-galactosidase	GO:0003824,GO:0005529,GO:0016787,GO:0043169,GO:0016798,GO:0004565,GO:0008152,GO:0005975,GO:0009341	1.236	0.0345	104	357	0.660107
1648	Ca	SS	2101	STCa-3765	CATGAGGTTTGTAAGACAATTTTGTT						1.222	0.0142	138	470	0.700619
1649	Ca	SS	2102	STCa-318	CATGAAACGAGTGCTTGTCTCTGTTT	Q5WM51_CICAR	Q5WM51	4e-07	Trypsin protein inhibitor 3	GO:4866	1.205	0.00109	242	808
1650	Ca	SS	2105	STCa-9373	CATGCGTTGTAATTTTCAAAGTTTGG	Q94ES4_PEA	Q94ES4	0.002	Root nodule extensin	GO:0005199,GO:0009664	1.202	0.000472	277	921	-1.62964
1651	Ca	SS	2106	STCa-48	CATGAAAAACAATGCAATTTTTTTAC						1.182	0.353	0	56.4
9439	Ca	SS	2107	STCa-75	CATGAAAAATAATGTGATGCACAGTT						1.182	0.353	0	56.4
1653	Ca	SS	2108	STCa-87	CATGAAAAATTTATTCATACATTGTG						1.182	0.353	0	56.4
1654	Ca	SS	2110	STCa-113	CATGAAAACGGTAGTTTGCTCATTGG						1.182	0.353	0	56.4
1655	Ca	SS	2112	STCa-145	CATGAAAAGGAATAAGGATCCAAGTT	Q93YI8_CORAV	Q93YI8	0.004	Lipoxygenase (EC 1.13.11.12)	GO:0016702,GO:0005506,GO:0016491,GO:0016165,GO:0046872,GO:0006118,GO:0008610,GO:0006633	1.182	0.353	0	56.4
1656	Ca	SS	2113	STCa-150	CATGAAAAGGGGCCTCACCAAAGAGG	Q93YZ6_ARATH	Q93YZ6	4e-05	AT4g00750/F15P23_1	GO:	1.182	0.353	0	56.4
1657	Ca	SS	2115	STCa-159	CATGAAAAGTGATGATGAAATGTTTA	Q9LW21_ARATH	Q9LW21	0.004	Arabidopsis thaliana genomic DNA, chromosome 3, P1 clone: MDJ14	GO:	1.182	0.332	34.6	113
1658	Ca	SS	2116	STCa-166	CATGAAAATAAAATTATGTATAGATT						1.182	0.353	0	56.4
1659	Ca	SS	2117	STCa-180	CATGAAAATAGATAAATATAGCTAAT						1.182	0.353	0	56.4
629	Ca	SS	2118	STCa-201	CATGAAAATCAAAGCTAGTCATAGAG						1.182	0.353	0	56.4
1661	Ca	SS	2119	STCa-223	CATGAAAATGCTGTTTTGCCAGTTTT	Q8L5C7_PEA	Q8L5C7	0.004	UDP-glucuronosyltransferase	GO:0016758,GO:0016757,GO:0016740,GO:0008152	1.182	0.353	0	56.4
1662	Ca	SS	2120	STCa-231	CATGAAAATGTACCAATAAATAATTA	O82708_PEA	O82708	0.007	Pre-pro-TPE4A protein precursor	GO:0008233,GO:0004197,GO:0016787,GO:0008234,GO:0006508	1.182	0.353	0	56.4
1664	Ca	SS	2122	STCa-233	CATGAAAATGTCTTACAAGAGTAAGG						1.182	0.353	0	56.4
1665	Ca	SS	2123	STCa-238	CATGAAAATTAAGTTCATCACTCTTG						1.182	0.353	0	56.4
1666	Ca	SS	2124	STCa-267	CATGAAACAAGGGACATAGGAGACTA						1.182	0.353	0	56.4
1667	Ca	SS	2125	STCa-293	CATGAAACATTACAACGAGAATAAAA						1.182	0.353	0	56.4
1668	Ca	SS	2127	STCa-296	CATGAAACATTATCTGCATCTTTTAT						1.182	0.353	0	56.4
1669	Ca	SS	2128	STCa-331	CATGAAACGTTGTATATATAAGAATT						1.182	0.353	0	56.4
1671	Ca	SS	2129	STCa-333	CATGAAACTAATAAAAAAAAATTGCA						1.182	0.353	0	56.4
12550	Ca	SS	2131	STCa-337	CATGAAACTATCAATAAGAGATAAAA						1.182	0.353	0	56.4
1673	Ca	SS	2133	STCa-344	CATGAAACTATTTTGTAAATTTAGAT						1.182	0.353	0	56.4
1674	Ca	SS	2134	STCa-361	CATGAAACTGGGAATCTTTACCTCAT						1.182	0.353	0	56.4
1675	Ca	SS	2135	STCa-367	CATGAAACTGTTCCGCATTTATTTTT						1.182	0.353	0	56.4
1676	Ca	SS	2136	STCa-383	CATGAAAGAAAAAACCCTGTTGGTCT						1.182	0.353	0	56.4
1677	Ca	SS	2137	STCa-392	CATGAAAGAAAGTGTTGTGTTACTGT						1.182	0.353	0	56.4
28995	Ca	SS	2138	STCa-434	CATGAAAGATTGTTAAACAAAAAAAA						1.182	0.353	0	56.4
44143	Ca	SS	2139	STCa-484	CATGAAAGGGACATAATAAACTTTAA						1.182	0.353	0	56.4
25524	Ca	SS	2140	STCa-492	CATGAAAGGGTAGAAAAATCAAATAA	Q70I28_LOTJA	Q70I28	0.009	S-receptor kinase-like protein 3 (RLK)	GO:0004672,GO:0005524,GO:0000166,GO:0005529,GO:0004872,GO:0004674,GO:0016301,GO:0016740,GO:0006468	1.182	0.353	0	56.4
1681	Ca	SS	2141	STCa-516	CATGAAAGTTAGAGATGGTAAAGGAT	RL133_ARATH	RL133	0.009	60S ribosomal protein L13-3	GO:0003735,GO:0006412,GO:0005622,GO:0005840,GO:0030529,GO:0005830	1.182	0.353	0	56.4
1682	Ca	SS	2142	STCa-518	CATGAAAGTTCAGTGAATAAATATGT						1.182	0.353	0	56.4
38497	Ca	SS	2143	STCa-526	CATGAAATAAAAGTATTATTTGCAAA						1.182	0.353	0	56.4
1684	Ca	SS	2147	STCa-561	CATGAAATATAATCTAGACAGGGATC						1.182	0.353	0	56.4
1685	Ca	SS	2149	STCa-563	CATGAAATATATCGCACTTTGTATTA						1.182	0.353	0	56.4
1686	Ca	SS	2150	STCa-611	CATGAAATGAGTTGTAGTTGATGAAT	SPD1_PEA	Q9ZTR1	0.009382	Spermidine synthase 1 (EC 2.5.1.16) (Putrescine aminopropyltransferase 1) (SPDSY 1)	GO:0003824,GO:0004766,GO:0016740,GO:0008295	1.182	0.353	0	56.4
1687	Ca	SS	2152	STCa-622	CATGAAATGCGAAGGACAATAGTAGT						1.182	0.353	0	56.4
1688	Ca	SS	2153	STCa-689	CATGAAATTGAGTACTGGATTTTAAT						1.182	0.332	34.6	113
1689	Ca	SS	2154	STCa-690	CATGAAATTGATGTAAGGCAATCAGT						1.182	0.332	34.6	113
1690	Ca	SS	2156	STCa-721	CATGAAATTGTAGTAAACTATTAATT						1.182	0.353	0	56.4
42813	Ca	SS	2157	STCa-730	CATGAAATTGTTGAAGATGAAATAGA	Q9M3V1_FAGSY	Q9M3V1	0.004	Protein phpsphatase 2C (PP2C) (EC 3.1.3.16)	GO:0003824,GO:0000287,GO:0004722,GO:0016787,GO:0004721,GO:0046872,GO:0006470,GO:0008287	1.182	0.353	0	56.4
1692	Ca	SS	2158	STCa-737	CATGAAATTTGAATAGTTGTGAAGAT						1.182	0.353	0	56.4
27680	Ca	SS	2159	STCa-743	CATGAAATTTTGTTTTTGTTTTATAA	RL4_PRUAR	Q9XF97	0.002374	60S ribosomal protein L4 (L1)	GO:0003735,GO:0006412,GO:0005622,GO:0005840,GO:0030529	1.182	0.353	0	56.4	0.86794
20556	Ca	SS	2160	STCa-774	CATGAACAAATTCAGAATGCTGTGGT	Q9FXT6_ARATH	Q9FXT6	0.01	PEX14 protein	GO:0016020,GO:0005777	1.182	0.353	0	56.4
1695	Ca	SS	2161	STCa-777	CATGAACAACTTCTCAGATAGTTGAT						1.182	0.353	0	56.4
1696	Ca	SS	2163	STCa-804	CATGAACAAGGATCAAACTCTTTCCA	Q8VYJ6_ARATH	Q8VYJ6	7e-05	At2g30880/F7F1.9	GO:	1.182	0.353	0	56.4
1697	Ca	SS	2165	STCa-819	CATGAACACAACTGTATTTACTTTAC						1.182	0.332	34.6	113
1698	Ca	SS	2166	STCa-836	CATGAACACTTTTGGAATCCTTTATT						1.182	0.353	0	56.4
1699	Ca	SS	2168	STCa-844	CATGAACAGACTGGTTTTCCAGAATA						1.182	0.353	0	56.4
28653	Ca	SS	2169	STCa-846	CATGAACAGATCCATTTGTATAAAAA						1.182	0.353	0	56.4
1701	Ca	SS	2171	STCa-880	CATGAACATTTATTTAATTAATAATG						1.182	0.353	0	56.4
1702	Ca	SS	2174	STCa-883	CATGAACATTTGTCCGTATTGTTTGA						1.182	0.353	0	56.4
1704	Ca	SS	2175	STCa-898	CATGAACCAGAAAGTCCAATGAATTA						1.182	0.353	0	56.4
1705	Ca	SS	2176	STCa-903	CATGAACCCCACAAAGTCAACTGGAC						1.182	0.353	0	56.4
25160	Ca	SS	2177	STCa-906	CATGAACCCCTTATGTGTAAACGGAT						1.182	0.353	0	56.4
32712	Ca	SS	2178	STCa-934	CATGAACCTGGGTTCAATGGATATTG						1.182	0.353	0	56.4
44214	Ca	SS	2181	STCa-935	CATGAACCTGTTCTACCTTGGCATTT						1.182	0.353	0	56.4
1709	Ca	SS	2182	STCa-942	CATGAACGAAAACAAACGATAATTGA						1.182	0.332	34.6	113
32790	Ca	SS	2185	STCa-987	CATGAACTACCCCAATAGATGGTTTG						1.182	0.353	0	56.4
1711	Ca	SS	2186	STCa-992	CATGAACTACTGTTGATTGTGATTTG						1.182	0.353	0	56.4
1712	Ca	SS	2189	STCa-999	CATGAACTAGTAGTGATTGGAAGGGT						1.182	0.353	0	56.4
1713	Ca	SS	2190	STCa-1058	CATGAACTTCAGAAAAAAGTTAGAGC						1.182	0.353	0	56.4
8691	Ca	SS	2191	STCa-1062	CATGAACTTGAAGGCAGAACGGTTGC						1.182	0.353	0	56.4
36458	Ca	SS	2192	STCa-1066	CATGAACTTGAGTGAAGACAATTAAA						1.182	0.353	0	56.4
1716	Ca	SS	2193	STCa-1086	CATGAACTTTGGTTTTAATGTTTCAA	Q704S5_MEDTR	Q704S5	0.009382	Polygalacturonase precursor (EC 3.2.1.15) (Glycoside hydrolase, family 28)	GO:0004650,GO:0016787,GO:0016798,GO:0008152,GO:0005975	1.182	0.353	0	56.4
1717	Ca	SS	2194	STCa-1114	CATGAAGAACAAAACGAAGAAGAGGA						1.182	0.353	0	56.4
1718	Ca	SS	2195	STCa-1202	CATGAAGACTATGAATGGAACAGATA	Q9LL85_SOLTU	Q9LL85	9e-05	DNA-binding protein p24	GO:3677	1.182	0.353	0	56.4
41169	Ca	SS	2196	STCa-1245	CATGAAGAGGTGGTGAACTTTTGAGT						1.182	0.353	0	56.4
1720	Ca	SS	2197	STCa-1313	CATGAAGATTTGGAACGTAACTATAG						1.182	0.353	0	56.4
1721	Ca	SS	2199	STCa-1322	CATGAAGCAAATTTTGGGTGTAACAG						1.182	0.353	0	56.4
1722	Ca	SS	2200	STCa-1419	CATGAAGGAAGTGATATCCTGAATTA						1.182	0.332	34.6	113
38144	Ca	SS	2201	STCa-1426	CATGAAGGAATATTTTCATTCCGTAT						1.182	0.353	0	56.4
1724	Ca	SS	2202	STCa-1431	CATGAAGGACCTTGAATTCGAGCAGA						1.182	0.353	0	56.4
38724	Ca	SS	2204	STCa-1434	CATGAAGGACCTTGTGATTATGTGAA						1.182	0.353	0	56.4
1726	Ca	SS	2206	STCa-1436	CATGAAGGAGAAACTCAAGATGTTCA						1.182	0.353	0	56.4
1727	Ca	SS	2209	STCa-1451	CATGAAGGATTCATAGGAAAGAAGTT	Q9MAH6_ARATH	Q9MAH6	0.009	F12M16.15	GO:4519	1.182	0.353	0	56.4
1728	Ca	SS	2210	STCa-1456	CATGAAGGCAGAGAATACCTTCTGTG						1.182	0.353	0	56.4
1729	Ca	SS	2211	STCa-1472	CATGAAGGCTCTTTCAGGTGTCGTTT	Q9ZTM9_PETHY	Q9ZTM9	4e-06	PGPS/D10	GO:	1.182	0.332	34.6	113
1730	Ca	SS	2212	STCa-1474	CATGAAGGGAAAAGGCATTTATGTAA						1.182	0.353	0	56.4
26605	Ca	SS	2216	STCa-1487	CATGAAGGTAAGGTTATTGGTTATTT						1.182	0.353	0	56.4
1732	Ca	SS	2218	STCa-1539	CATGAAGTATATACCACGTGAAGATT						1.182	0.332	34.6	113
1733	Ca	SS	2219	STCa-1606	CATGAAGTTCTATTATGTAGTCCACA						1.182	0.353	0	56.4
33885	Ca	SS	2220	STCa-1608	CATGAAGTTCTTATGCTATACAAATT						1.182	0.353	0	56.4
42517	Ca	SS	2221	STCa-1615	CATGAAGTTGATTCTTAATGTGTTTT						1.182	0.353	0	56.4
1736	Ca	SS	2222	STCa-1626	CATGAAGTTTCTGTTCCATTTATATT						1.182	0.353	0	56.4
1737	Ca	SS	2223	STCa-1628	CATGAAGTTTTAATATATGTATGTGT						1.182	0.353	0	56.4	0.709513
1738	Ca	SS	2224	STCa-1629	CATGAAGTTTTAGTCTATACAAAAAA						1.182	0.353	0	56.4
1739	Ca	SS	2225	STCa-1636	CATGAATAAAAAAAAAAAAAAAAACT						1.182	0.353	0	56.4
1740	Ca	SS	2226	STCa-1637	CATGAATAAAAAAGATATATAGTTGG						1.182	0.353	0	56.4
40344	Ca	SS	2228	STCa-1639	CATGAATAAAAATATAAATAAATAAA	Q68RU8_PANGI	Q68RU8	0.001	Ycf1 protein	GO:0016020,GO:0009507,GO:0016021	1.182	0.353	0	56.4
1742	Ca	SS	2229	STCa-1651	CATGAATAAATAAAGATGACAACAAG						1.182	0.353	0	56.4
2600	Ca	SS	2230	STCa-1700	CATGAATACCGTCTACAAGGATGGAA	Q7FZ76_ORYSA	Q7FZ76	0.009382	UMP synthase	GO:0003824,GO:0004588,GO:0004590,GO:0016740,GO:0009116,GO:0008152,GO:0006221,GO:0006207	1.182	0.353	0	56.4	0.306013
1744	Ca	SS	2231	STCa-1708	CATGAATACTTCAAGTTCTAAAAATG	O65738_CICAR	O65738	4e-07	Replication factor C/activator 1 subunit	GO:	1.182	0.353	0	56.4
34735	Ca	SS	2232	STCa-1736	CATGAATATACTTTTCTGCAAAAAAA						1.182	0.353	0	56.4
27278	Ca	SS	2233	STCa-1773	CATGAATCAAAAAAAAAAAAAAAAAA						1.182	0.353	0	56.4
18730	Ca	SS	2234	STCa-1812	CATGAATCCTACCAAGGCTATTTCAA						1.182	0.353	0	56.4
1748	Ca	SS	2235	STCa-1843	CATGAATCTGAACTTGGTGGTTATAC						1.182	0.353	0	56.4
1749	Ca	SS	2236	STCa-1854	CATGAATCTTGATGAATGCCTGAGAG						1.182	0.353	0	56.4
1750	Ca	SS	2237	STCa-1863	CATGAATGAAATATAACAAACAAAAA						1.182	0.353	0	56.4
1186	Ca	SS	2238	STCa-1908	CATGAATGATCGAACATAAAAGCAAC						1.182	0.353	0	56.4
1752	Ca	SS	2239	STCa-1923	CATGAATGATTTCGTCAAGATGACTG						1.182	0.353	0	56.4
42191	Ca	SS	2241	STCa-1924	CATGAATGATTTGGACTATGGAAATT						1.182	0.353	0	56.4
1460	Ca	SS	2242	STCa-1930	CATGAATGCAGAGCTATGCCTGAGAA						1.182	0.353	0	56.4
36157	Ca	SS	2245	STCa-1938	CATGAATGCTAATAAATGGTCATTCA						1.182	0.353	0	56.4
1756	Ca	SS	2246	STCa-1958	CATGAATGGATCAATGAGATTCCCAC	Q53AN3_ORYSA	Q53AN3	4e-07	Gibberellin-stimulated protein	GO:	1.182	0.353	0	56.4	0.287432
1757	Ca	SS	2247	STCa-1962	CATGAATGGATTAAAATGTCCACATT						1.182	0.353	0	56.4
1758	Ca	SS	2248	STCa-1983	CATGAATGGATTAACGAGATTCGAGC	O04892_TOBAC	O04892	9e-05	Cytochrome P450 like_TBP (EC 1.14.14.1)	GO:0016491,GO:0050381	1.182	0.353	0	56.4
1759	Ca	SS	2249	STCa-2016	CATGAATGTAATGTACTAATAAAATT						1.182	0.353	0	56.4
32974	Ca	SS	2250	STCa-2018	CATGAATGTAATTTGAATTTCTTGGT						1.182	0.353	0	56.4
1761	Ca	SS	2252	STCa-2023	CATGAATGTATCTTGTTTGGCTCTCT						1.182	0.353	0	56.4
1762	Ca	SS	2253	STCa-2027	CATGAATGTCCAACTTTTAGGATGAG						1.182	0.353	0	56.4
1946	Ca	SS	2254	STCa-2037	CATGAATGTGGAGGATTTTAGCTGCT	Q9ZS49_TOBAC	Q9ZS49	0.004	Avr9 elicitor response protein	GO:0008378,GO:0006486,GO:0016020	1.182	0.353	0	56.4
1764	Ca	SS	2255	STCa-2049	CATGAATGTTTGTAGAATTAGCTATG						1.182	0.353	0	56.4
20452	Ca	SS	2256	STCa-2053	CATGAATGTTTTCATATATAAGAGTA						1.182	0.332	34.6	113
1766	Ca	SS	2257	STCa-2082	CATGAATTAGAATATCATAAGTAGTA	O81930_CICAR	O81930	0.0001	Cysteine proteinase	GO:0008233,GO:0004197,GO:0016787,GO:0008234,GO:0006508	1.182	0.353	0	56.4
1767	Ca	SS	2262	STCa-2101	CATGAATTATCGGCTTTATGAGCTGG						1.182	0.353	0	56.4
1768	Ca	SS	2263	STCa-2105	CATGAATTATTATGTTCCTTGTTTTT						1.182	0.353	0	56.4
1769	Ca	SS	2265	STCa-2108	CATGAATTCAGTACTATCTAAATTGC						1.182	0.353	0	56.4
1770	Ca	SS	2266	STCa-2136	CATGAATTGCTGGGGTCAAGTGTAAA	Q94A22_ARATH	Q94A22	0.002374	AT4g28240/F26K10_120 (Putative wound-induced protein)	GO:	1.182	0.12	69.2	226	0.937269
1771	Ca	SS	2267	STCa-2143	CATGAATTGGTTCTACTACTTTCTTG						1.182	0.353	0	56.4
1772	Ca	SS	2268	STCa-2168	CATGAATTTATTTTTCCTCCATTGAA						1.182	0.353	0	56.4
1773	Ca	SS	2269	STCa-2181	CATGAATTTGAATGTGTACTTGTAGT						1.182	0.353	0	56.4
14912	Ca	SS	2270	STCa-2201	CATGAATTTGTTGCGGCAAAAAAAAA						1.182	0.353	0	56.4
33552	Ca	SS	2272	STCa-2206	CATGAATTTTATTTTGAAATTTTAGT						1.182	0.353	0	56.4
2438	Ca	SS	2273	STCa-2220	CATGACAAAAAAAAAAAAAAAAAAAT						1.182	0.353	0	56.4
1777	Ca	SS	2274	STCa-2222	CATGACAAAAAAAAAAAAAAAAACTA						1.182	0.353	0	56.4
19092	Ca	SS	2275	STCa-2223	CATGACAAAAAAAAAAAAAAAAACTG						1.182	0.353	0	56.4
1779	Ca	SS	2277	STCa-2235	CATGACAAAATATCGTCCTTACTGGT	Q9M3Y6_CICAR	Q9M3Y6	4e-07	68 kDa protein	GO:0016758,GO:0016051	1.182	0.353	0	56.4
1780	Ca	SS	2279	STCa-2257	CATGACAAATACTATCAAATGTCTTT						1.182	0.353	0	56.4
1781	Ca	SS	2280	STCa-2262	CATGACAAATGAAGAGGCGTGTGATT	O81709_ARATH	O81709	0.004	Protein phosphatase 2C (PP2C)	GO:0003824,GO:0000287,GO:0004722,GO:0016787,GO:0004721,GO:0046872,GO:0006470,GO:0008287	1.182	0.353	0	56.4
1782	Ca	SS	2281	STCa-2270	CATGACAAATTTGCTGTTAGTGACTC	Q9LJK5_ARATH	Q9LJK5	0.004	Dem protein	GO:	1.182	0.353	0	56.4
10703	Ca	SS	2282	STCa-2299	CATGACAAGAGGTGGTTCTTGTATTT						1.182	0.353	0	56.4
1784	Ca	SS	2283	STCa-2316	CATGACAAGTACATAGAATTCGAGCA						1.182	0.353	0	56.4
1785	Ca	SS	2285	STCa-2317	CATGACAAGTAGAGTGTAAAATTTAT	Q9LHJ1_ARATH	Q9LHJ1	0.0003	Gb|AAF14829.1	GO:	1.182	0.353	0	56.4
1786	Ca	SS	2286	STCa-2347	CATGACAATTCCTGCACACGAGAATG	Q6H975_ANTMA	Q6H975	2e-05	STY-L protein	GO:0030154,GO:0007275	1.182	0.353	0	56.4
2483	Ca	SS	2287	STCa-2353	CATGACAATTGTAACTATGAATCTTA						1.182	0.353	0	56.4
1788	Ca	SS	2289	STCa-2377	CATGACACATTTTTGTCAGGAGTCAG						1.182	0.353	0	56.4
30675	Ca	SS	2291	STCa-2380	CATGACACCTTATGTGTCAAGTAATC	RETOL_ARATH	Q9SVG4	0.002374	Reticuline oxidase-like protein precursor (EC 1.21.-.-)	GO:0048503,GO:0016491,GO:0006118,GO:0016020	1.182	0.332	34.6	113	0.72222
1790	Ca	SS	2293	STCa-2411	CATGACAGAAGTACATAAAGAATTCG						1.182	0.353	0	56.4
1791	Ca	SS	2294	STCa-2487	CATGACATAGGACTAGTAGTAGATTT						1.182	0.353	0	56.4
1792	Ca	SS	2295	STCa-2497	CATGACATCAAGAGGTGCAAGCACTT	Q6RI22_9ASPA	Q6RI22	0.002374	60S ribosomal protein L44	GO:0003735,GO:0006412,GO:0005622,GO:0005840,GO:0030529	1.182	0.353	0	56.4
1793	Ca	SS	2296	STCa-2519	CATGACATTCCACCTTTTGGATGAAC						1.182	0.353	0	56.4
1794	Ca	SS	2297	STCa-2544	CATGACATTTTAATGTTTTTTTTCCT						1.182	0.353	0	56.4
1795	Ca	SS	2298	STCa-2547	CATGACCAAAAAAAAAAAAAAAAAAA						1.182	0.353	0	56.4
43782	Ca	SS	2299	STCa-2565	CATGACCAAGTATCAGCAACCACCTT						1.182	0.353	0	56.4
27395	Ca	SS	2300	STCa-2622	CATGACCCCAACAACCAGGAGTTGCT	Q6IWG5_ARAHY	Q6IWG5	0.007	Glycinin	GO:45735	1.182	0.332	34.6	113
16019	Ca	SS	2301	STCa-2716	CATGACGACTGCAAGTTAAGGTTTTG	ADF2_PETHY	Q9FVI1	2e-05	Actin-depolymerizing factor 2 (ADF-2)	GO:0003779,GO:0005622	1.182	0.353	0	56.4
3400	Ca	SS	2302	STCa-2829	CATGACTATGCAAGACGACTTTTAGG						1.182	0.12	69.2	226
1800	Ca	SS	2303	STCa-2839	CATGACTATTGCCTTTGAAGTTTTGC	RER1B_ARATH	O48671	2e-05	Protein RER1B (AtRER1B)	GO:0016020,GO:0016021	1.182	0.353	0	56.4
1801	Ca	SS	2305	STCa-2842	CATGACTATTTTGGATGAACTTCTTC	RHM3_ARATH	Q9LH76	7e-05	Probable rhamnose biosynthetic enzyme 3 (EC 4.2.1.-) (EC 1.1.1.-)	GO:0003824,GO:0016491,GO:0016829,GO:0050662,GO:0044237	1.182	0.353	0	56.4
37467	Ca	SS	2306	STCa-2910	CATGACTGGGCCTTACCAAATTTTGT	Q5YJP4_HYAOR	Q5YJP4	0.001	AT4g12590-like protein (Fragment)	GO:	1.182	0.353	0	56.4
1803	Ca	SS	2307	STCa-2924	CATGACTGTCGTTTTGGTAACTTGTC						1.182	0.353	0	56.4
30936	Ca	SS	2308	STCa-2944	CATGACTTATTGCCTGAACTATCTTC						1.182	0.353	0	56.4
1805	Ca	SS	2309	STCa-2970	CATGACTTGTGCACAAGAAAAACTGT						1.182	0.353	0	56.4
3470	Ca	SS	2311	STCa-2975	CATGACTTGTTTCTTATTTATGAAAA						1.182	0.353	0	56.4
3698	Ca	SS	2312	STCa-2976	CATGACTTGTTTTAGTAGAAGCAATG						1.182	0.353	0	56.4
1808	Ca	SS	2313	STCa-3042	CATGAGAAATTTCCCAAGCTTTATAA	GSTX6_SOYBN	P32110	7e-05	Probable glutathione S-transferase (EC 2.5.1.18) (Heat shock protein 26A) (G2-4) (HSP)	GO:0004364,GO:0016740,GO:0006457,GO:0006986	1.182	0.353	0	56.4
33901	Ca	SS	2314	STCa-3086	CATGAGAAGTCCCACCTCGCGTCATT						1.182	0.353	0	56.4
1810	Ca	SS	2315	STCa-3091	CATGAGAATACTGAAGTAGGGAAATG						1.182	0.353	0	56.4
1811	Ca	SS	2316	STCa-3124	CATGAGAATTTTCATTAGTATTGCTT						1.182	0.353	0	56.4
1812	Ca	SS	2317	STCa-3138	CATGAGACAGAGGTTACAGGTGATGA						1.182	0.353	0	56.4
1813	Ca	SS	2318	STCa-3162	CATGAGACTGTTACTGTGATGTATTG						1.182	0.353	0	56.4
1814	Ca	SS	2320	STCa-3294	CATGAGATTCTTAACCAGATAGTTTA						1.182	0.353	0	56.4
1815	Ca	SS	2321	STCa-3309	CATGAGATTTAAGTTTGTTATTCAAC						1.182	0.353	0	56.4
31408	Ca	SS	2322	STCa-3318	CATGAGCAAAAAACCCTGTTGGTCTC						1.182	0.353	0	56.4
1817	Ca	SS	2323	STCa-3347	CATGAGCAGAAGAAATGTATTTGATT						1.182	0.353	0	56.4
3776	Ca	SS	2324	STCa-3369	CATGAGCATAGATTTGTTTGAGCACC						1.182	0.353	0	56.4
1819	Ca	SS	2325	STCa-3419	CATGAGCTAACAATTAACCATATATG						1.182	0.353	0	56.4
1820	Ca	SS	2326	STCa-3429	CATGAGCTCAAATTTTATGCTGTATA						1.182	0.353	0	56.4
1822	Ca	SS	2327	STCa-3474	CATGAGGAAAGAGAGAAAACAGAGCA						1.182	0.353	0	56.4
1823	Ca	SS	2328	STCa-3597	CATGAGGCAATGCGTAAAATGAAGAA						1.182	0.353	0	56.4
1825	Ca	SS	2329	STCa-3721	CATGAGGTCAGGCTGATAAATGAACT						1.182	0.353	0	56.4
1826	Ca	SS	2332	STCa-3778	CATGAGTAAGAATGTGTATATATATA						1.182	0.353	0	56.4
1827	Ca	SS	2334	STCa-3780	CATGAGTAAGCAAATATAGCTAATAT	MT1_CICAR	MT1	0.0001	Metallothionein-like protein 1; MT-1	GO:46872	1.182	0.353	0	56.4
3937	Ca	SS	2336	STCa-3784	CATGAGTAATGTTGTTAAGATTTTGG	Q9LM67_ARATH	Q9LM67	0.009	F2D10.36	GO:0005215,GO:0005351,GO:0006810,GO:0008643,GO:0016020,GO:0016021	1.182	0.353	0	56.4
32717	Ca	SS	2337	STCa-3793	CATGAGTACTATACATTCGATTTATC						1.182	0.353	0	56.4
1830	Ca	SS	2338	STCa-3801	CATGAGTAGATTGTATAAAAAAAAAA						1.182	0.353	0	56.4
1831	Ca	SS	2339	STCa-3802	CATGAGTAGATTGTATATATGTGGTC						1.182	0.353	0	56.4
1832	Ca	SS	2340	STCa-3816	CATGAGTAGTAGTACTAGTGGTGGAG						1.182	0.353	0	56.4
38084	Ca	SS	2341	STCa-3819	CATGAGTAGTGTGTAACTTTTTCTCT						1.182	0.353	0	56.4
1834	Ca	SS	2342	STCa-3867	CATGAGTCGCAGTGGAAGAGATGATA						1.182	0.353	0	56.4
4492	Ca	SS	2343	STCa-3898	CATGAGTGACTTCAAAGTTCATATAT						1.182	0.353	0	56.4
1836	Ca	SS	2344	STCa-3907	CATGAGTGAGCATTATGATATTCGAG						1.182	0.353	0	56.4
1837	Ca	SS	2345	STCa-3908	CATGAGTGAGGAAGAGGATGCTTCTA						1.182	0.353	0	56.4
1838	Ca	SS	2346	STCa-3917	CATGAGTGCACTTACCCTTGGATATT						1.182	0.353	0	56.4
1839	Ca	SS	2347	STCa-3921	CATGAGTGCTGTTTGCTGTTTTTTTT						1.182	0.353	0	56.4
1840	Ca	SS	2348	STCa-3943	CATGAGTGTACTTTAGCAAATTGAAA						1.182	0.353	0	56.4
1841	Ca	SS	2349	STCa-3949	CATGAGTGTATTACACTAAAGTTTGT	Q9LFM3_ARATH	Q9LFM3	0.001	Separation anxiety protein-like (At5g11340)	GO:8080	1.182	0.353	0	56.4
1842	Ca	SS	2352	STCa-3967	CATGAGTTACAACGAAAGCTCATCCT						1.182	0.353	0	56.4
4634	Ca	SS	2353	STCa-3978	CATGAGTTAGCTCGTTTTAAATTCGG						1.182	0.353	0	56.4
1844	Ca	SS	2354	STCa-4020	CATGAGTTGTGTTTTACTTGTCCTCT						1.182	0.353	0	56.4
1845	Ca	SS	2356	STCa-4048	CATGAGTTTTCTAAGATTGTTATTTA						1.182	0.353	0	56.4
25483	Ca	SS	2357	STCa-4084	CATGATAAAGGGACTTCAGTGCTTTT	Q6JJ29_IPOTF	Q6JJ29	2e-05	Prephenate dehydratase	GO:0004664,GO:0009094	1.182	0.353	0	56.4	0.693647
1847	Ca	SS	2358	STCa-4094	CATGATAAAGTTTGTTTCTTATGGTG						1.182	0.353	0	56.4
1848	Ca	SS	2360	STCa-4133	CATGATAAGAATCTGGCAAAAAAAAA						1.182	0.353	0	56.4
30162	Ca	SS	2362	STCa-4145	CATGATAAGGCTGCCGATTGGTGGAG	KPK1_ARATH	P42818	2e-05	Serine/threonine-protein kinase AtPK1/AtPK6 (EC 2.7.11.1)	GO:0004672,GO:0005524,GO:0000166,GO:0004674,GO:0016301,GO:0016740,GO:0006468	1.182	0.353	0	56.4
4764	Ca	SS	2364	STCa-4155	CATGATAATAACAAAATTTTATATGA	Q9FR36_SOYBN	Q9FR36	0.007	Putative steroid reductase	GO:16021	1.182	0.353	0	56.4
42320	Ca	SS	2365	STCa-4158	CATGATAATAATGTTTGGGCTTTGCT						1.182	0.353	0	56.4
1852	Ca	SS	2366	STCa-4170	CATGATAATATGTCGGCTGATTCAAT	Q7Y0Y9_SOYBN	Q7Y0Y9	0.0003	Dehydration responsive element binding protein (DREB)	GO:0003700,GO:0006355,GO:0005634	1.182	0.12	69.2	226
1853	Ca	SS	2367	STCa-4181	CATGATAATGCATATTATTAAATGGG						1.182	0.353	0	56.4
4777	Ca	SS	2368	STCa-4182	CATGATAATGCTTTTGTTGCATCTCG	Q9LQR6_ARATH	Q9LQR6	0.002	T4O12.23	GO:	1.182	0.353	0	56.4
39712	Ca	SS	2369	STCa-4184	CATGATAATGTAATAATTTTGTTTAG	Q7XYH1_MEDTR	Q7XYH1	0.007	Nodule-enhanced malate dehydrogenase	GO:0046554,GO:0016491	1.182	0.353	0	56.4
1856	Ca	SS	2370	STCa-4195	CATGATAATTGAATTCGAGCAGAAAA						1.182	0.353	0	56.4
3834	Ca	SS	2371	STCa-4212	CATGATAATTTTATTTCCAATAACGA	Q6IVL3_GOSHI	Q6IVL3	0.001	Transcription factor DRE-binding factor 2 (Dehydration responsive element-binding protein 2) (DREB)	GO:0003700,GO:0006355,GO:0005634	1.182	0.353	0	56.4
1858	Ca	SS	2374	STCa-4214	CATGATACAAAAAAAAAAAAAAAAAA						1.182	0.353	0	56.4
1859	Ca	SS	2375	STCa-4313	CATGATAGGACAGCCGAAGTAACTAT						1.182	0.353	0	56.4
1860	Ca	SS	2376	STCa-4336	CATGATAGTGCAGAAGATGTTCTTAG						1.182	0.353	0	56.4
1861	Ca	SS	2377	STCa-4345	CATGATAGTTTAATTCAAAATCCAGC						1.182	0.353	0	56.4
1862	Ca	SS	2378	STCa-4360	CATGATATAATTTGGTATTTTAAACC						1.182	0.353	0	56.4
1863	Ca	SS	2379	STCa-4364	CATGATATAATTTGGTATTTTTAAAT						1.182	0.353	0	56.4
5926	Ca	SS	2380	STCa-4459	CATGATATGGTTTTGTGTTACTGTGG						1.182	0.353	0	56.4
1865	Ca	SS	2381	STCa-4478	CATGATATTAGATTTGCTTGTAATAT						1.182	0.353	0	56.4
1866	Ca	SS	2382	STCa-4496	CATGATATTGGTAATCGTTTTGGTGG						1.182	0.353	0	56.4
1867	Ca	SS	2383	STCa-4498	CATGATATTGGTATCGTTTTGGTGGT						1.182	0.353	0	56.4
1868	Ca	SS	2384	STCa-4509	CATGATATTTGGTTTTATGGTGAGAT						1.182	0.353	0	56.4
1869	Ca	SS	2385	STCa-4510	CATGATATTTTATAGTTTTAATTGCA						1.182	0.353	0	56.4
1870	Ca	SS	2386	STCa-4511	CATGATATTTTATTGAGTGTAAGTTT						1.182	0.353	0	56.4
1871	Ca	SS	2389	STCa-4535	CATGATCAAATGGAGTGGTGGAAATC	Q84LL6_BETVU	Q84LL6	7e-05	Salt tolerance protein 5	GO:	1.182	0.353	0	56.4
1872	Ca	SS	2391	STCa-4605	CATGATCATCAATGAAATTATGAAAA						1.182	0.353	0	56.4
1873	Ca	SS	2392	STCa-4615	CATGATCATTAATAGAGAATGTTTCA						1.182	0.353	0	56.4
1874	Ca	SS	2393	STCa-4621	CATGATCATTGAGATGTATATGTATA						1.182	0.353	0	56.4
1875	Ca	SS	2394	STCa-4627	CATGATCATTTGTACAGTTGGTAGAA						1.182	0.353	0	56.4
1876	Ca	SS	2395	STCa-4705	CATGATCGTTAATTAATAATTAACAT						1.182	0.353	0	56.4
1877	Ca	SS	2396	STCa-4790	CATGATGAAACCTGGAAGTATGTCTG						1.182	0.353	0	56.4
6043	Ca	SS	2397	STCa-4845	CATGATGAAGATGATATGCCAGAACA	MSI1_SOLLC	O22466	2e-05	WD-40 repeat protein MSI1	GO:5634	1.182	0.353	0	56.4
1879	Ca	SS	2398	STCa-4846	CATGATGAAGATGCAGCTGAAGTTGA						1.182	0.353	0	56.4
1880	Ca	SS	2399	STCa-4860	CATGATGAAGTTCCTGAGGTCATAAA	Q69XR3_ORYSA	Q69XR3	2e-05	Hydrolase-like	GO:16787	1.182	0.353	0	56.4
1881	Ca	SS	2400	STCa-4879	CATGATGACACTATTCTTTCTTCATT						1.182	0.353	0	56.4
1882	Ca	SS	2401	STCa-4919	CATGATGAGATCCTTATTAGTTAAAA						1.182	0.353	0	56.4
19535	Ca	SS	2404	STCa-4969	CATGATGAGTTAGTGACTAATGCAAT						1.182	0.353	0	56.4
1884	Ca	SS	2405	STCa-4976	CATGATGATAAAAATAAATAAATGAT	Q9FME7_ARATH	Q9FME7	2e-05	Kinesin-like protein	GO:0003774,GO:0003777,GO:0005524,GO:0000166,GO:0007018,GO:0005874,GO:0005875	1.182	0.353	0	56.4
1885	Ca	SS	2406	STCa-4988	CATGATGATCAAAAAAAAAAAAAAAA						1.182	0.353	0	56.4
1886	Ca	SS	2408	STCa-5048	CATGATGATTCCTCTGTTTGCTTTCT						1.182	0.332	34.6	113
1887	Ca	SS	2410	STCa-5141	CATGATGCTATCTTGATTATTATGAT						1.182	0.353	0	56.4
1888	Ca	SS	2411	STCa-5164	CATGATGCTTCAAATGCTCTTTCTTC	Q41498_SOLTU	Q41498	0.004	U1snRNP-specific protein, U1A	GO:0000166,GO:0003676	1.182	0.353	0	56.4
1889	Ca	SS	2412	STCa-5212	CATGATGGAGTGGCTTGAATTGAATT						1.182	0.353	0	56.4
1890	Ca	SS	2413	STCa-5214	CATGATGGAGTTAGAGTTAGCACATT						1.182	0.353	0	56.4
1891	Ca	SS	2414	STCa-5235	CATGATGGCAGTTTTGCTTCTGAGAA						1.182	0.353	0	56.4
42202	Ca	SS	2415	STCa-5241	CATGATGGCCGTTCATATATTTCCTA						1.182	0.353	0	56.4
34920	Ca	SS	2416	STCa-5245	CATGATGGCGTGATCTCCTGATATCA						1.182	0.353	0	56.4
1894	Ca	SS	2417	STCa-5284	CATGATGGGTCTAAGTTGTGGTTGGA						1.182	0.353	0	56.4
34996	Ca	SS	2419	STCa-5286	CATGATGGGTGAAGTTTTGTACTTGC						1.182	0.353	0	56.4
41844	Ca	SS	2420	STCa-5332	CATGATGGTTATGATAATGTGGTTCC						1.182	0.353	0	56.4
28099	Ca	SS	2421	STCa-5336	CATGATGGTTGTAGGTACAAGTGATC						1.182	0.353	0	56.4
7289	Ca	SS	2423	STCa-5338	CATGATGGTTTAAATATATTTTTAGT						1.182	0.353	0	56.4
1899	Ca	SS	2425	STCa-5345	CATGATGGTTTTCCAAAGTGGCTCAC						1.182	0.353	0	56.4
23350	Ca	SS	2426	STCa-5355	CATGATGTAAATTTAACTTATTTAGT						1.182	0.353	0	56.4
1901	Ca	SS	2429	STCa-5357	CATGATGTAACTCTACCCACTGTTTT						1.182	0.332	34.6	113	-0.3439
1902	Ca	SS	2432	STCa-5368	CATGATGTACACACAAATATTCAATC						1.182	0.353	0	56.4
292	Ca	SS	2434	STCa-5478	CATGATGTTACATTAAAGCAAGAAAA						1.182	0.353	0	56.4
1904	Ca	SS	2435	STCa-5485	CATGATGTTATTATTTTTGATTTGAT						1.182	0.353	0	56.4
1905	Ca	SS	2436	STCa-5525	CATGATTAAAATTGTAGTTTAGTCTA						1.182	0.353	0	56.4
1906	Ca	SS	2437	STCa-5586	CATGATTAGTAATTAATTATGTATGC						1.182	0.353	0	56.4
1907	Ca	SS	2438	STCa-5616	CATGATTATGTTGCCAAAAAAAAAAA						1.182	0.353	0	56.4
7670	Ca	SS	2441	STCa-5617	CATGATTATGTTGTACAAAAAAAAAA						1.182	0.353	0	56.4
1909	Ca	SS	2443	STCa-5619	CATGATTATGTTGTCAAAAAAAAAAT						1.182	0.353	0	56.4
36242	Ca	SS	2445	STCa-5631	CATGATTATTAATCTTATACTCTCTG						1.182	0.353	0	56.4
35660	Ca	SS	2446	STCa-5639	CATGATTATTATTTACGTTATGTTAT						1.182	0.353	0	56.4
1912	Ca	SS	2447	STCa-5664	CATGATTCAATAGGACTTGGAGAGGA	Q9LZY8_ARATH	Q9LZY8	2e-05	Transketolase-like protein	GO:4802	1.182	0.353	0	56.4
1913	Ca	SS	2449	STCa-5665	CATGATTCAATGTGATAACCAATGGT	Q9LSM0_ARATH	Q9LSM0	0.009	Anthocyanidin-3-glucoside rhamnosyltransferase	GO:0016758,GO:0016757,GO:0016740,GO:0008152	1.182	0.353	0	56.4
1914	Ca	SS	2450	STCa-5670	CATGATTCACACTCAAATTGGATAGC	Q9LW69_ARATH	Q9LW69	3e-07	Peptide/amino acid transporter-like protein	GO:0005215,GO:0006857,GO:0016020	1.182	0.353	0	56.4
1915	Ca	SS	2453	STCa-5720	CATGATTCTTATCCTAGATCTAAAAG						1.182	0.353	0	56.4	0.789366
6036	Ca	SS	2454	STCa-5723	CATGATTGAAATCTACGGCTAGAGAG						1.182	0.353	0	56.4
1917	Ca	SS	2456	STCa-5757	CATGATTGATATTCTGTTACAAAATA						1.182	0.353	0	56.4
30482	Ca	SS	2458	STCa-5762	CATGATTGATGTCATAGACTCCAGAA						1.182	0.353	0	56.4
1919	Ca	SS	2459	STCa-5784	CATGATTGCCGTGCCATTTCTCTCTG						1.182	0.353	0	56.4
1920	Ca	SS	2460	STCa-5834	CATGATTGGTGAAGGTGATCACTGGA						1.182	0.353	0	56.4
1921	Ca	SS	2462	STCa-5855	CATGATTGTAGTTTCTGTAGAATTTG						1.182	0.353	0	56.4
1922	Ca	SS	2463	STCa-5864	CATGATTGTGCCTTTATAATGTGCTG						1.182	0.353	0	56.4
1923	Ca	SS	2464	STCa-5869	CATGATTGTTCGCTAAAAAAAAAAAA						1.182	0.353	0	56.4
8443	Ca	SS	2465	STCa-5937	CATGATTTATTTGATCTACATAATAG						1.182	0.353	0	56.4
1925	Ca	SS	2466	STCa-5956	CATGATTTGAAATAAAAATATAATCA						1.182	0.353	0	56.4
1926	Ca	SS	2467	STCa-5959	CATGATTTGAAGTTATCTCCACTGGG	Q8H176_ARATH	Q8H176	0.001	At2g36580/F1O11.21	GO:0000287,GO:0004743,GO:0016301,GO:0016740,GO:0016772,GO:0006096	1.182	0.353	0	56.4
26224	Ca	SS	2468	STCa-6005	CATGATTTGTGATTACAAAAAAAAAA						1.182	0.353	0	56.4
1928	Ca	SS	2471	STCa-6007	CATGATTTGTGCCAAAAATCCATTTT	IFR_CICAR	IFR	0.0001	Isoflavone reductase; NADPH:isoflavone oxidoreductase; 2'-hydroxyisoflavone reductase; IFR	GO:0016564,GO:0016491,GO:0047526,GO:0006808	1.182	0.353	0	56.4
1929	Ca	SS	2472	STCa-6025	CATGATTTTATTACGGGAATGGTTGT						1.182	0.353	0	56.4
26254	Ca	SS	2475	STCa-6035	CATGATTTTCTGGGAGAGGTCCATTT						1.182	0.353	0	56.4
30880	Ca	SS	2477	STCa-6065	CATGCAAAAAAAAAAAAAAAAAAAAC						1.182	0.353	0	56.4
1932	Ca	SS	2480	STCa-6073	CATGCAAAAAAAAAAAAAAAAACTAG						1.182	0.353	0	56.4
1933	Ca	SS	2481	STCa-6088	CATGCAAAAACAGTAAATCAATGTTG						1.182	0.332	34.6	113
1934	Ca	SS	2482	STCa-6089	CATGCAAAAAGATCACAATAATCTTG						1.182	0.353	0	56.4
16541	Ca	SS	2483	STCa-6101	CATGCAAAACCCAAAAAGGTTTGCTG	Q8LLD9_SOLTU	Q8LLD9	7e-08	BEL1-related homeotic protein 29 (Fragment)	GO:0003677,GO:0043565,GO:0003700,GO:0045449,GO:0006355,GO:0005634	1.182	0.353	0	56.4
1936	Ca	SS	2484	STCa-6112	CATGCAAAAGCTAACAGAGTGAGCCA						1.182	0.353	0	56.4
1937	Ca	SS	2485	STCa-6118	CATGCAAAATAAAAAAAAAAAAAAAA						1.182	0.353	0	56.4
1938	Ca	SS	2486	STCa-6165	CATGCAAACGCTGATGATGTGTAGAC	Q9FSY9_CICAR	Q9FSY9	7e-06	Putative extensin	GO:	1.182	0.353	0	56.4
1939	Ca	SS	2487	STCa-6174	CATGCAAACGCTGATGATGTGTTTAG	Q9FSY9_CICAR	Q9FSY9	0.0001	Putative extensin	GO:	1.182	0.353	0	56.4
27539	Ca	SS	2490	STCa-6224	CATGCAAAGGTTACTCCAAAATTTTG	O82357_ARATH	O82357	2e-05	3-methyl-2-oxobutanoate hydroxy-methyl-transferase (At2g46110)	GO:0003864,GO:0016740,GO:0015940	1.182	0.353	0	56.4
8717	Ca	SS	2491	STCa-6239	CATGCAAATAGAAATAAAAAATATTA						1.182	0.353	0	56.4
1942	Ca	SS	2492	STCa-6240	CATGCAAATAGAATAGAGCATAGGTT						1.182	0.353	0	56.4
1943	Ca	SS	2493	STCa-6241	CATGCAAATAGGCGAAGTTGCTCGTC	FKB12_VICFA	FKB12	0.004	Peptidyl-prolyl isomerase FKBP12 (EC 5.2.1.8) (12 kDa FK506-binding protein) (12 kDa FKBP) (FKBP-12) (Immunophilin FKBP12) (Peptidyl- prolyl cis-trans isomerase) (PPIase) (Rotamase)	GO:0016853,GO:0003755,GO:0006457	1.182	0.353	0	56.4
8011	Ca	SS	2494	STCa-6251	CATGCAAATATTATGTTGCACGCTTT						1.182	0.353	0	56.4
1945	Ca	SS	2495	STCa-6274	CATGCAAATGTGAAATATGTTAAAAA						1.182	0.353	0	56.4
9113	Ca	SS	2497	STCa-6301	CATGCAACACCTGAATCTATAGTGTA						1.182	0.353	0	56.4
35117	Ca	SS	2498	STCa-6315	CATGCAACATCAATATTAGACATATG						1.182	0.353	0	56.4
1948	Ca	SS	2499	STCa-6320	CATGCAACATTTACTTTGTATTACTA						1.182	0.353	0	56.4
1949	Ca	SS	2500	STCa-6321	CATGCAACATTTCATTGAGTTAAAAA						1.182	0.353	0	56.4
1950	Ca	SS	2501	STCa-6323	CATGCAACATTTCATTGAGTTATATA						1.182	0.332	34.6	113
3306	Ca	SS	2502	STCa-6350	CATGCAACCCGTAAGGATATTTATTG						1.182	0.12	69.2	226	0.71295
3307	Ca	SS	2503	STCa-6385	CATGCAACTCAAGCAGGAAATCCAAA	Q8H934_VICFA	Q8H934	0.009	Phototropin	GO:0004672,GO:0004871,GO:0000155,GO:0005524,GO:0004674,GO:0007165,GO:0006468,GO:0006355,GO:0000160	1.182	0.353	0	56.4
43012	Ca	SS	2506	STCa-6399	CATGCAACTGCACAGGGTATATAATC						1.182	0.353	0	56.4
1954	Ca	SS	2507	STCa-6435	CATGCAAGAAGTGGTGGGACGAGTAC						1.182	0.353	0	56.4
43562	Ca	SS	2508	STCa-6437	CATGCAAGACAATCCCTCATAAATAA						1.182	0.353	0	56.4
1956	Ca	SS	2509	STCa-6454	CATGCAAGAGTCAGGAATTAAATATT						1.182	0.353	0	56.4
1957	Ca	SS	2511	STCa-6465	CATGCAAGATTGTGATCTTTTGTATA	O65752_CICAR	O65752	4e-07	Hypothetical protein	GO:	1.182	0.12	69.2	226	0.880042
9311	Ca	SS	2512	STCa-6503	CATGCAAGGCTCATTCTTTGTACCAT	O22526_TOBAC	O22526	3e-07	Cation-chloride co-transporter	GO:0015377,GO:0006821,GO:0006814,GO:0006810,GO:0016020,GO:0016021	1.182	0.353	0	56.4
36934	Ca	SS	2514	STCa-6549	CATGCAAGTGCAGGTGGCTAAAGATA	Q9FK89_ARATH	Q9FK89	1e-06	Emb|CAB66399.1	GO:	1.182	0.353	0	56.4
28568	Ca	SS	2517	STCa-6576	CATGCAAGTTGTACAAATTAATAATT	Q9LUL9_ARATH	Q9LUL9	4e-06	Arabidopsis thaliana genomic DNA, chromosome 3, P1 clone: MLN21 (At3g14280)	GO:	1.182	0.353	0	56.4
14218	Ca	SS	2519	STCa-6582	CATGCAAGTTTGCATATAAGAATGCC						1.182	0.353	0	56.4
1962	Ca	SS	2520	STCa-6691	CATGCAATGGAAATAAATTTTGTAGC						1.182	0.353	0	56.4
1963	Ca	SS	2521	STCa-6707	CATGCAATGTTGAGCTACCTAATTCC						1.182	0.12	69.2	226
1964	Ca	SS	2522	STCa-6709	CATGCAATGTTGTAAATACATAATTG						1.182	0.353	0	56.4
1965	Ca	SS	2523	STCa-6722	CATGCAATTATAAGCTAAAATGTAAT						1.182	0.353	0	56.4
1966	Ca	SS	2524	STCa-6725	CATGCAATTATTAATAAAAAAAAAAT						1.182	0.353	0	56.4
1967	Ca	SS	2525	STCa-6752	CATGCAATTGTAGGAAATAATTTTAG						1.182	0.353	0	56.4
1968	Ca	SS	2526	STCa-6754	CATGCAATTGTAGTGTCAAAAAACAT						1.182	0.353	0	56.4
1969	Ca	SS	2527	STCa-6760	CATGCAATTTAAGTTCCTTGGTTAAA						1.182	0.353	0	56.4
14219	Ca	SS	2529	STCa-6790	CATGCACAAAGTTATGAGATTTTTTT						1.182	0.353	0	56.4
1971	Ca	SS	2530	STCa-6791	CATGCACAAATTATAGTAACCCTTAA						1.182	0.353	0	56.4
14220	Ca	SS	2531	STCa-6803	CATGCACAACTGGGATAAAAATAATT						1.182	0.353	0	56.4
14221	Ca	SS	2534	STCa-6840	CATGCACACCAAGAATACTGCTGTAG						1.182	0.353	0	56.4
14222	Ca	SS	2535	STCa-6842	CATGCACACCATATATATGTATGGAT						1.182	0.353	0	56.4
9464	Ca	SS	2536	STCa-6888	CATGCACAGGTTGATGGTTCAATGTT	Q41038_PEA	Q41038	2e-06	Type II chlorophyll a/b binding protein from photosystem I precursor	GO:0009765,GO:0016020	1.182	0.353	0	56.4	0.215111
14223	Ca	SS	2537	STCa-6918	CATGCACATAGTGCAATTGTGTGTTC						1.182	0.353	0	56.4
14224	Ca	SS	2538	STCa-6922	CATGCACATATACAGGATTTTATTGG	Q93XL9_ROSHC	Q93XL9	0.0003	CTR1-like protein kinase	GO:0004672,GO:0005524,GO:0000166,GO:0004674,GO:0004713,GO:0016301,GO:0016740,GO:0006468,GO:0016020	1.182	0.332	34.6	113
14225	Ca	SS	2539	STCa-6950	CATGCACATTTTGTGTGAGATTAACT						1.182	0.353	0	56.4
14226	Ca	SS	2541	STCa-7106	CATGCACTCACTATTCATTTTCAAAG						1.182	0.353	0	56.4
14227	Ca	SS	2542	STCa-7110	CATGCACTCTCAACTTTTTGCATTAT	Q5SMT0_ORYSA	Q5SMT0	7e-08	GTPase activating protein-like	GO:	1.182	0.353	0	56.4
14228	Ca	SS	2543	STCa-7112	CATGCACTCTCACGACACTATTTTGA						1.182	0.353	0	56.4
36287	Ca	SS	2544	STCa-7148	CATGCACTTGAAGATTCAGGTCATAA	Q9AT54_TOBAC	Q9AT54	2e-05	Phenylpropanoid:glucosyltransferase 1 (Fragment)	GO:0016758,GO:0016757,GO:0016740,GO:0008152	1.182	0.353	0	56.4
14230	Ca	SS	2545	STCa-7160	CATGCACTTTACAAAAGAAATAAGAA						1.182	0.353	0	56.4
1984	Ca	SS	2546	STCa-7161	CATGCACTTTAGGAGGAAAATGGGGG	RH5_ORYSJ	Q6YS30	0.000601	DEAD-box ATP-dependent RNA helicase 5 (EC 3.6.1.-)	GO:0008026,GO:0005524,GO:0000166,GO:0003676,GO:0016787,GO:0004386	1.182	0.353	0	56.4
14231	Ca	SS	2547	STCa-7164	CATGCACTTTCAAAAGAAATAAAAAA	Q6R6M7_PEA	Q6R6M7	0.0001	NADP-dependent isocitrate dehydrogenase I	GO:0004450,GO:0016491,GO:0016652,GO:0008152	1.182	0.353	0	56.4
1986	Ca	SS	2548	STCa-7170	CATGCACTTTCAGTTCAAAAAAAAAA						1.182	0.353	0	56.4
1987	Ca	SS	2549	STCa-7176	CATGCACTTTCAGTTCAGTGTTTCAA						1.182	0.353	0	56.4
14232	Ca	SS	2551	STCa-7183	CATGCACTTTCAGTTCAGTTGTTTTA						1.182	0.353	0	56.4
1989	Ca	SS	2552	STCa-7201	CATGCAGAAACAAATGAATATAAGTA						1.182	0.353	0	56.4
1990	Ca	SS	2553	STCa-7248	CATGCAGAGGATCAAAGACTTATCTC	APRR5_ARATH	Q6LA42	2e-05	Two-component response regulator-like APRR5 (Pseudo-response regulator 5) (APRR)	GO:0000156,GO:0006350,GO:0006355,GO:0000160,GO:0005634	1.182	0.353	0	56.4
1991	Ca	SS	2554	STCa-7262	CATGCAGAGTTTGATAATTATTTTTA						1.182	0.353	0	56.4
14233	Ca	SS	2555	STCa-7342	CATGCAGCAGGGAAGCTGTTTCTTTT	Q9LNG4_ARATH	Q9LNG4	0.004	F21D18.17	GO:	1.182	0.353	0	56.4
1993	Ca	SS	2557	STCa-7390	CATGCAGGAAAGCATTTGAATTCGAG						1.182	0.353	0	56.4
1994	Ca	SS	2558	STCa-7497	CATGCAGTACTTGCTTAGTTAGCTAT						1.182	0.353	0	56.4
1995	Ca	SS	2561	STCa-7512	CATGCAGTAGTTGCTTAGGAAATTAA						1.182	0.353	0	56.4
1996	Ca	SS	2562	STCa-7516	CATGCAGTAGTTGCTTAGGAAATTTC						1.182	0.353	0	56.4
1997	Ca	SS	2563	STCa-7521	CATGCAGTAGTTGCTTATGTTGTTTC						1.182	0.353	0	56.4
1998	Ca	SS	2564	STCa-7553	CATGCAGTCCAACACGTGAATCAGTT						1.182	0.353	0	56.4
1999	Ca	SS	2565	STCa-7570	CATGCAGTGCATATGTAATGCTGAAT						1.182	0.353	0	56.4
14234	Ca	SS	2568	STCa-7580	CATGCAGTGGTACCTGAAATAAGAGA						1.182	0.353	0	56.4
2001	Ca	SS	2570	STCa-7581	CATGCAGTGGTGAATTGAATTGTCAG	Q8L5W2_SOYBN	Q8L5W2	0.002374	BZIP transcription factor ATB2 (BZIP)	GO:0003677,GO:0043565,GO:0046983,GO:0003700,GO:0006355,GO:0005634	1.182	0.353	0	56.4	0.495306
2002	Ca	SS	2571	STCa-7585	CATGCAGTGTACTTAAATCAGTAGCT						1.182	0.353	0	56.4
14235	Ca	SS	2572	STCa-7597	CATGCAGTTAACAGGTGTTTTTCTCT						1.182	0.353	0	56.4
2004	Ca	SS	2573	STCa-7602	CATGCAGTTAATTCAATCACTTTTAT						1.182	0.332	34.6	113
10148	Ca	SS	2574	STCa-7616	CATGCAGTTGAAAATTGTGTATTGTA						1.182	0.353	0	56.4
2006	Ca	SS	2575	STCa-7619	CATGCAGTTGTGAATTTAGAACTAAT						1.182	0.353	0	56.4
10412	Ca	SS	2576	STCa-7626	CATGCAGTTGTTGAGAGACAACCTGA	14312_ARATH	Q9C5W6	2e-05	14-3-3-like protein GF14 iota (General regulatory factor 12)	GO:19904	1.182	0.353	0	56.4
36816	Ca	SS	2577	STCa-7641	CATGCAGTTTTGCAAGAAGTAAAAGC						1.182	0.353	0	56.4
2009	Ca	SS	2578	STCa-7645	CATGCAGTTTTTTATTTTTCTTTTTG						1.182	0.353	0	56.4
2010	Ca	SS	2579	STCa-7670	CATGCATAATAATTGTGTATAGTATA						1.182	0.353	0	56.4
2011	Ca	SS	2582	STCa-7731	CATGCATAGCCTAAGCGTGTTACAAT						1.182	0.353	0	56.4
14237	Ca	SS	2583	STCa-7743	CATGCATAGGGTTTCAGTGTTCTTTC						1.182	0.353	0	56.4
2013	Ca	SS	2585	STCa-7746	CATGCATAGTAAAAAAAAAAAAAAAA						1.182	0.353	0	56.4
2014	Ca	SS	2588	STCa-7748	CATGCATAGTAAAACTGTAAAGTAAT						1.182	0.353	0	56.4
2015	Ca	SS	2590	STCa-7749	CATGCATAGTAACAAAAAAAAAAAAA						1.182	0.353	0	56.4
2016	Ca	SS	2591	STCa-7787	CATGCATATGATATGATATATAATAA	Q945Q7_MEDSA	Q945Q7	0.001	Dehydrin-like protein	GO:0009415,GO:0006950	1.182	0.353	0	56.4
11267	Ca	SS	2592	STCa-7799	CATGCATATTATTAAACAAAGAGGAG						1.182	0.353	0	56.4
2018	Ca	SS	2596	STCa-7810	CATGCATATTTAGCTTATGTTGTTTC						1.182	0.353	0	56.4
2019	Ca	SS	2598	STCa-7833	CATGCATATTTTGATAACTTTAAATT						1.182	0.353	0	56.4
11577	Ca	SS	2600	STCa-7863	CATGCATCATCTAGAATAATAAAGGA						1.182	0.353	0	56.4
39652	Ca	SS	2601	STCa-7894	CATGCATCTCATCACTTGCTTGTGTT	Q9ZNQ4_CICAR	Q9ZNQ4	3e-05	Superoxide dismutase	GO:0004785,GO:0016491,GO:0005507,GO:0004784,GO:0008270,GO:0046872,GO:0006801	1.182	0.353	0	56.4
2022	Ca	SS	2602	STCa-7896	CATGCATCTCATCACTTGCTTGTTTA	Q9ZNQ4_CICAR	Q9ZNQ4	4e-07	Superoxide dismutase	GO:0004785,GO:0016491,GO:0005507,GO:0004784,GO:0008270,GO:0046872,GO:0006801	1.182	0.00801	173	564
21384	Ca	SS	2603	STCa-7900	CATGCATCTCCACTCTCTTTACTGTT	Q8S3U2_NICBE	Q8S3U2	1e-06	EDS1-like protein	GO:0004806,GO:0006629	1.182	0.353	0	56.4
2024	Ca	SS	2604	STCa-7966	CATGCATTCGGTAACAAGCATTCTTT						1.182	0.353	0	56.4
30957	Ca	SS	2605	STCa-7982	CATGCATTCTTGATTGTCAATTTATC						1.182	0.353	0	56.4
2026	Ca	SS	2606	STCa-8011	CATGCATTGGTCAATATTAATTTATA	Q9FS26_SOLTU	Q9FS26	0.009382	Plastidic cysteine synthase 1	GO:0003824,GO:0016740,GO:0004124,GO:0008152,GO:0019344,GO:0006535,GO:0008652	1.182	0.353	0	56.4	0.914289
40531	Ca	SS	2607	STCa-8026	CATGCATTGTCAATCTATCAAAGTGT						1.182	0.353	0	56.4
29786	Ca	SS	2608	STCa-8027	CATGCATTGTCGTACTCATAACCGCA						1.182	0.353	0	56.4
2029	Ca	SS	2609	STCa-8043	CATGCATTGTGCCAAAAATCCATTTT	IFR_CICAR	IFR	0.0001	Isoflavone reductase; NADPH:isoflavone oxidoreductase; 2'-hydroxyisoflavone reductase; IFR	GO:0016564,GO:0016491,GO:0047526,GO:0006808	1.182	0.353	0	56.4
44083	Ca	SS	2610	STCa-8053	CATGCATTGTTTGCATTTTCTACTGT						1.182	0.353	0	56.4
41358	Ca	SS	2614	STCa-8080	CATGCATTTGATTTATTTATTTATTA	O65449_ARATH	O65449	0.009382	Pectinesterase like protein (At4g22010)	GO:0016491,GO:0005507	1.182	0.353	0	56.4
12220	Ca	SS	2615	STCa-8133	CATGCCAAAGAAAGGTTCCACTTGAG						1.182	0.353	0	56.4
35230	Ca	SS	2616	STCa-8159	CATGCCAACAAACTAATCCAATTCAA						1.182	0.353	0	56.4
35232	Ca	SS	2617	STCa-8168	CATGCCAACATTTTGGTGGCTATTTA	PAL3_ARATH	PAL3	0.009	Phenylalanine ammonia-lyase 3	GO:0016211,GO:0016841,GO:0045548,GO:0016829,GO:0009058,GO:0006559,GO:0009698,GO:0005737	1.182	0.353	0	56.4
2035	Ca	SS	2618	STCa-8188	CATGCCAAGACTTTTAGTTTCGTGAT						1.182	0.353	0	56.4
2036	Ca	SS	2619	STCa-8283	CATGCCAATTGTATCTTTAGGTGTTT						1.182	0.353	0	56.4
35236	Ca	SS	2620	STCa-8287	CATGCCAATTTTTGTACTAGCAAATC						1.182	0.353	0	56.4
2038	Ca	SS	2621	STCa-8302	CATGCCACATATTGTTTATTGCTAAA	Q1SHX5_MEDTR	Q1SHX5	5e-07	Zinc finger, C2H2-type (C2H2)	GO:0003676,GO:0008270,GO:0005622	1.182	0.353	0	56.4
2039	Ca	SS	2622	STCa-8362	CATGCCAGATGCGTGTAAGTGTTGAA						1.182	0.353	0	56.4
29426	Ca	SS	2623	STCa-8375	CATGCCAGCTTTGAGTTTATAATTGG						1.182	0.353	0	56.4
38200	Ca	SS	2624	STCa-8435	CATGCCATCTTTTGTAATAGTGCAGC						1.182	0.353	0	56.4
36855	Ca	SS	2625	STCa-8456	CATGCCATTTGTGATTGGAATTATGT						1.182	0.353	0	56.4
7502	Ca	SS	2627	STCa-8471	CATGCCCAACAAGAGACATTTTGGGT						1.182	0.353	0	56.4
30371	Ca	SS	2628	STCa-8603	CATGCCCTATGTGCAGGCAGCAAATT	Q9LVN6_ARATH	Q9LVN6	3e-07	Gb|AAF01562.1	GO:	1.182	0.353	0	56.4
2045	Ca	SS	2631	STCa-8625	CATGCCCTTTTCTTTGGATCAGAAGA						1.182	0.353	0	56.4
2046	Ca	SS	2634	STCa-8696	CATGCCGGTTGCAAATCGAAACATCC	Q5RJC3_ARATH	Q5RJC3	0.004	At5g59830	GO:	1.182	0.353	0	56.4
2047	Ca	SS	2635	STCa-8731	CATGCCTACAACCAAAGGAGAGAGTA	Q1SJ54_MEDTR	Q1SJ54	0.0001	AT4g39690/T19P19_80	GO:	1.182	0.332	34.6	113
2048	Ca	SS	2636	STCa-8760	CATGCCTATGCAATTGTCATTGTTGA						1.182	0.353	0	56.4
2049	Ca	SS	2637	STCa-8794	CATGCCTCTGCTAGCATTTCTTTCTT	GRP2_NICSY	GRP2	0.008	Glycine-rich protein 2	GO:0003677,GO:0003676,GO:0003723,GO:0008270,GO:0046872,GO:0006355	1.182	0.353	0	56.4
1325	Ca	SS	2639	STCa-8798	CATGCCTGAAATTGAGACGAATATCT						1.182	0.353	0	56.4
977	Ca	SS	2641	STCa-8807	CATGCCTGATACTACTAGATGATCAA						1.182	0.353	0	56.4
2175	Ca	SS	2642	STCa-8811	CATGCCTGATGGATCAACCCGACCGC	Q8S2G4_ORYSA	Q8S2G4	1e-06	Mucin-like protein	GO:	1.182	0.353	0	56.4
2054	Ca	SS	2643	STCa-8817	CATGCCTGCATTCTGACTGGACGTAT						1.182	0.353	0	56.4
3042	Ca	SS	2645	STCa-8848	CATGCCTGTCTGTTGGAAAGCTTGTG						1.182	0.353	0	56.4
2056	Ca	SS	2646	STCa-8855	CATGCCTGTTTCCAATGTTGGATTCG						1.182	0.353	0	56.4
2057	Ca	SS	2649	STCa-8871	CATGCCTTATTGTTATTATGACCATC	Q5WM51_CICAR	Q5WM51	4e-07	Trypsin protein inhibitor 3	GO:4866	1.182	0.353	0	56.4
2058	Ca	SS	2650	STCa-8898	CATGCCTTTATATTGAATTCGAGCAG						1.182	0.353	0	56.4
2059	Ca	SS	2652	STCa-8909	CATGCCTTTGGAAACAAAATAATATA						1.182	0.353	0	56.4
2060	Ca	SS	2653	STCa-8917	CATGCCTTTTGCCATATAGAGAACCA						1.182	0.353	0	56.4
2061	Ca	SS	2654	STCa-8941	CATGCGAAATGTTGAGGATGATTTAG						1.182	0.353	0	56.4
2062	Ca	SS	2655	STCa-8979	CATGCGAATTAAGAATCATAAAACAT						1.182	0.353	0	56.4
2063	Ca	SS	2656	STCa-9001	CATGCGACTCACCAAGAAAATCCAAA						1.182	0.353	0	56.4
2064	Ca	SS	2657	STCa-9039	CATGCGAGTTTATTTAAATCGAGGTC						1.182	0.332	34.6	113
2065	Ca	SS	2658	STCa-9043	CATGCGATATTATTCGGGTTCCACAG						1.182	0.353	0	56.4
12549	Ca	SS	2662	STCa-9051	CATGCGATGGCGAAGTTCCACCTAAA						1.182	0.353	0	56.4
12422	Ca	SS	2663	STCa-9057	CATGCGATTAGTTCTGCTGCTTTTGA						1.182	0.353	0	56.4
2068	Ca	SS	2664	STCa-9063	CATGCGATTGTCAATCATTTATTTCG						1.182	0.353	0	56.4
21305	Ca	SS	2665	STCa-9113	CATGCGCTTTCTAAAACTGTTTCCGG						1.182	0.353	0	56.4
2070	Ca	SS	2666	STCa-9116	CATGCGGAAAAGGCGGTAGTAGGAAG						1.182	0.353	0	56.4
2071	Ca	SS	2668	STCa-9169	CATGCGGCAGGGTTCTTTTTTTACAA						1.182	0.12	69.2	226
2072	Ca	SS	2669	STCa-9209	CATGCGGGCTAAGTGGAAGAAGAAGC	RL41_ARATH	P62120	4e-05	60S ribosomal protein L41	GO:0003735,GO:0006412,GO:0005840,GO:0030529	1.182	0.353	0	56.4
2073	Ca	SS	2671	STCa-9267	CATGCGTCAAACTAGTTGCTGTCGGT	O81921_CICAR	O81921	0.026	Elongation factor 1-alpha; EF1-a	GO:0003924,GO:0000166,GO:0003746,GO:0005525,GO:0006412	1.182	0.353	0	56.4
43570	Ca	SS	2674	STCa-9295	CATGCGTCGGCGGTCTTGAGTGTTTG						1.182	0.353	0	56.4
2075	Ca	SS	2675	STCa-9312	CATGCGTGCATACTTTCCGCGTTGAT						1.182	0.353	0	56.4
2076	Ca	SS	2676	STCa-9344	CATGCGTGTTAGACCAGCAAATCCAA						1.182	0.353	0	56.4
2077	Ca	SS	2677	STCa-9362	CATGCGTTCGCACCCTACGGCAAAAT						1.182	0.353	0	56.4
2078	Ca	SS	2678	STCa-9379	CATGCGTTTCAAGACCAAATAATCAT						1.182	0.353	0	56.4
2079	Ca	SS	2679	STCa-9391	CATGCTAAAACGCTTGATTGATGTGT						1.182	0.353	0	56.4
37812	Ca	SS	2680	STCa-9392	CATGCTAAAAGTCACCCATTCTTTTG						1.182	0.353	0	56.4
28676	Ca	SS	2681	STCa-9404	CATGCTAAAGCGAGAACTGCACCAGC						1.182	0.353	0	56.4
10876	Ca	SS	2685	STCa-9461	CATGCTAATCAAGATCAAAGACCAAC						1.182	0.353	0	56.4
39022	Ca	SS	2686	STCa-9464	CATGCTAATGAAGCTAATCTTGATGC						1.182	0.353	0	56.4
35322	Ca	SS	2687	STCa-9529	CATGCTACTTATTTAAATTTTATACA	Q2TI80_SOYBN	Q2TI80	0.026	Senescence-related receptor-like kinase (RLK)	GO:0004872,GO:0016301	1.182	0.353	0	56.4
32827	Ca	SS	2688	STCa-9556	CATGCTAGCAAGTCTGCAATTGATTG						1.182	0.353	0	56.4
34151	Ca	SS	2690	STCa-9583	CATGCTAGTACTGTTAGGCGTGATGG	Q9FEZ7_SOYBN	Q9FEZ7	4e-06	Ribosomal protein L2	GO:0003735,GO:0006412,GO:0005622,GO:0005840,GO:0030529	1.182	0.353	0	56.4
12538	Ca	SS	2691	STCa-9586	CATGCTAGTATGGTATTAATATTGGA						1.182	0.353	0	56.4
18454	Ca	SS	2694	STCa-9596	CATGCTAGTTCATAAATAGTTTGTTC						1.182	0.353	0	56.4
34632	Ca	SS	2696	STCa-9611	CATGCTATAGATGCTAGTTAAAGCTT						1.182	0.353	0	56.4
2090	Ca	SS	2697	STCa-9640	CATGCTATGGAAATTATTCATTTGCT	RS5_CICAR	RS5	4e-07	40S ribosomal protein S5	GO:0003735,GO:0006412,GO:0015935,GO:0005622,GO:0005840,GO:0030529	1.182	0.332	34.6	113
2091	Ca	SS	2698	STCa-9702	CATGCTCAATGCTCATCACTCACCGC						1.182	0.353	0	56.4
2092	Ca	SS	2699	STCa-9718	CATGCTCAGAAAGACCAAGAAAGAAA	HSP7M_PHAVU	Q01899	7e-08	Heat shock 70 kDa protein, mitochondrial precursor (HSP)	GO:0005524,GO:0000166,GO:0051082,GO:0006457,GO:0006986,GO:0005739	1.182	0.353	0	56.4
2093	Ca	SS	2701	STCa-9733	CATGCTCAGGGAAACACCGGTGAAAA						1.182	0.353	0	56.4
2094	Ca	SS	2702	STCa-9775	CATGCTCCTTGCCCCGTGACTATTGT						1.182	0.353	0	56.4
2095	Ca	SS	2706	STCa-9788	CATGCTCGCCCAACAACCACCAGTTC						1.182	0.353	0	56.4
2096	Ca	SS	2708	STCa-9789	CATGCTCGCCGTAAAACAGTTACTGC						1.182	0.353	0	56.4
2097	Ca	SS	2710	STCa-9812	CATGCTCTATCTGTTTGTTTCATTAA						1.182	0.353	0	56.4
2098	Ca	SS	2712	STCa-9827	CATGCTCTCGCTTCAACTGCAAATCC						1.182	0.353	0	56.4
13139	Ca	SS	2713	STCa-9846	CATGCTCTTGCAATGATTATTGGTGA						1.182	0.353	0	56.4
2100	Ca	SS	2714	STCa-9858	CATGCTGAAAAACCTCCCAAAGAGGT	Q1SUQ6_MEDTR	Q1SUQ6	5e-07	Peptide chain release factor eRF/aRF subunit 1	GO:0016149,GO:0006415,GO:0005737	1.182	0.353	0	56.4
13333	Ca	SS	2715	STCa-9859	CATGCTGAAACTCAGCATCATTGATT						1.182	0.353	0	56.4
22151	Ca	SS	2716	STCa-9907	CATGCTGAGAATTAAAATATCAAAAA						1.182	0.353	0	56.4
26169	Ca	SS	2717	STCa-9909	CATGCTGAGAGACTTACCATTTCATA						1.182	0.353	0	56.4
2104	Ca	SS	2718	STCa-9914	CATGCTGAGCACTTAAATGAATAGTT						1.182	0.12	69.2	226
860	Ca	SS	2719	STCa-9946	CATGCTGATGTCTTAAGCTATAAGAG						1.182	0.353	0	56.4
13582	Ca	SS	2720	STCa-9967	CATGCTGCATATTGAGACCAACCATA						1.182	0.353	0	56.4
36797	Ca	SS	2722	STCa-9982	CATGCTGCCTTCCAAGCTGCTTCAGA	Q38IW8_SOYBN	Q38IW8	0.026	Triosephosphate isomerase	GO:0003824,GO:0016853,GO:0004807,GO:0008152	1.182	0.353	0	56.4
2109	Ca	SS	2723	STCa-9986	CATGCTGCGATAGCTGTTTGTTTACT						1.182	0.353	0	56.4
3552	Ca	SS	2724	STCa-10025	CATGCTGGATTAAGCCAATTTTTGTT						1.182	0.353	0	56.4
2111	Ca	SS	2725	STCa-10082	CATGCTGTATTTAGTGAAAACTGGGT						1.182	0.353	0	56.4
14863	Ca	SS	2727	STCa-10122	CATGCTGTTATATGCTAAAAAAAAAA						1.182	0.353	0	56.4
2113	Ca	SS	2728	STCa-10142	CATGCTGTTTAATTAATAATGTCCTT						1.182	0.353	0	56.4
2114	Ca	SS	2729	STCa-10153	CATGCTTAAAAAAAAAAAAAAAAAAA						1.182	0.353	0	56.4
2116	Ca	SS	2731	STCa-10225	CATGCTTATATGAGACCACTTGGTAT	PSA6_SOYBN	PSA6	0.002	Proteasome subunit alpha type 6; Proteasome iota subunit; 20S proteasome alpha subunit A; 20S proteasome subunit alpha-1	GO:0008233,GO:0004175,GO:0016787,GO:0004298,GO:0006511,GO:0043234,GO:0005829,GO:0005839	1.182	0.353	0	56.4
9259	Ca	SS	2732	STCa-10243	CATGCTTATTCGGTTCCTTGGTGGAA						1.182	0.353	0	56.4
2118	Ca	SS	2733	STCa-10273	CATGCTTCATTTGGGGATTTTAACTA						1.182	0.353	0	56.4
2119	Ca	SS	2734	STCa-10287	CATGCTTCGCATAATTCCTCCGATGG						1.182	0.353	0	56.4
2120	Ca	SS	2735	STCa-10300	CATGCTTCTATTATAACCGTAATTTA						1.182	0.353	0	56.4
34959	Ca	SS	2736	STCa-10301	CATGCTTCTCTCGAGCGCGAATCAAT	P93323_MEDSA	P93323	0.026	Cdc2MsF protein	GO:0004672,GO:0005524,GO:0000166,GO:0004674,GO:0016301,GO:0016740,GO:0006468	1.182	0.353	0	56.4
15706	Ca	SS	2739	STCa-10303	CATGCTTCTGGATATGTTTATAGGTT	Q9M3Z8_CICAR	Q9M3Z8	4e-07	Trypsin protein inhibitor 1	GO:4866	1.182	0.353	0	56.4
5872	Ca	SS	2740	STCa-10330	CATGCTTGATGGGGATTTAGATGGCT	Q8LKN2_ARATH	Q8LKN2	0.009382	SUMO activating enzyme 2	GO:0004839,GO:0003824,GO:0006512,GO:0006464	1.182	0.353	0	56.4
35037	Ca	SS	2741	STCa-10338	CATGCTTGCTATTATTATCTCCTTAG						1.182	0.353	0	56.4
2126	Ca	SS	2743	STCa-10346	CATGCTTGGAGCAGCAACATTTTAAT	Q9SQK9_SOLLC	Q9SQK9	9e-06	Jasmonic acid 1 (Fragment)	GO:0003677,GO:0043565,GO:0003700,GO:0045449,GO:0006355,GO:0005634	1.182	0.353	0	56.4
35584	Ca	SS	2744	STCa-10365	CATGCTTGGTTAGATATGTTGTATTT						1.182	0.353	0	56.4
1731	Ca	SS	2745	STCa-10366	CATGCTTGGTTAGATATGTTGTTTTG						1.182	0.353	0	56.4
11284	Ca	SS	2748	STCa-10400	CATGCTTGTTATAGTTAGCCTTTCTC	Q5WM50_CICAR	Q5WM50	4e-07	Hypothetical protein	GO:	1.182	0.353	0	56.4
4303	Ca	SS	2750	STCa-10404	CATGCTTGTTGAATGCTTTAATCCTT						1.182	0.353	0	56.4
2131	Ca	SS	2751	STCa-10407	CATGCTTGTTGTTCCAGAGATTAGAG						1.182	0.353	0	56.4
2132	Ca	SS	2752	STCa-10416	CATGCTTTAACTTTGTATTTTGTATT						1.182	0.353	0	56.4
4739	Ca	SS	2753	STCa-10417	CATGCTTTAAGCCTAATTTTGCATAG						1.182	0.353	0	56.4
16729	Ca	SS	2754	STCa-10436	CATGCTTTATAATTTTTTGGCGTCAT						1.182	0.353	0	56.4
11130	Ca	SS	2755	STCa-10460	CATGCTTTGAATACTAAAAGAAAACA	FB76_ARATH	Q9FYF9	0.009382	F-box protein At1g67340	GO:0005488,GO:0008270,GO:0005634	1.182	0.353	0	56.4
6475	Ca	SS	2756	STCa-10479	CATGCTTTGTAAGGATGATCGTTGTG						1.182	0.353	0	56.4
2139	Ca	SS	2757	STCa-10488	CATGCTTTGTGCTGACTATGGCGTGT						1.182	0.353	0	56.4
2140	Ca	SS	2759	STCa-10494	CATGCTTTGTTAAATGCAAATGGATA						1.182	0.353	0	56.4
2141	Ca	SS	2761	STCa-10512	CATGCTTTTGAGTTGATTTGTGATTT						1.182	0.353	0	56.4
2142	Ca	SS	2762	STCa-10530	CATGGAAAAAAAAAAAAAAAAAAAAT						1.182	0.353	0	56.4
41129	Ca	SS	2763	STCa-10538	CATGGAAAAAAAAAAAAAAAAAATAA						1.182	0.353	0	56.4
2144	Ca	SS	2764	STCa-10549	CATGGAAAAAAAAAAAAAAACTAGCT						1.182	0.353	0	56.4
2145	Ca	SS	2765	STCa-10554	CATGGAAAAAAGTACAAATATATAAA	Q8LAZ1_ARATH	Q8LAZ1	0.0006	Very-long-chain fatty acid condensing enzyme CUT1	GO:0016740,GO:0008415	1.182	0.353	0	56.4
2146	Ca	SS	2766	STCa-10559	CATGGAAAAATAGGATTCAGTGTTCC						1.182	0.353	0	56.4
2147	Ca	SS	2767	STCa-10564	CATGGAAAACACAACTATTTTATTTA	Q6V4S2_IPOTF	Q6V4S2	0.001	Glycosyltransferase 10	GO:16740	1.182	0.353	0	56.4
2148	Ca	SS	2768	STCa-10598	CATGGAAAATTTATGTAAACATTACG	NO23_SOYBN	NO23	0.026	Nodulin 23 precursor; N-23	GO:9877	1.182	0.353	0	56.4
11419	Ca	SS	2769	STCa-10601	CATGGAAAATTTGCAGTGGTTTTGAG	Q84MC1_ARATH	Q84MC1	0.008	At4g31290	GO:	1.182	0.353	0	56.4
2151	Ca	SS	2770	STCa-10616	CATGGAAACCCAAGTTTGCCATTGAG						1.182	0.332	34.6	113
2152	Ca	SS	2772	STCa-10622	CATGGAAACGCTGATGATGTGTAGTT	Q9FSY9_CICAR	Q9FSY9	0.0001	Putative extensin	GO:	1.182	0.353	0	56.4
2153	Ca	SS	2773	STCa-10669	CATGGAAAGTCGAAAATACAGCCTAC						1.182	0.332	34.6	113
17218	Ca	SS	2774	STCa-10712	CATGGAAATGGATAGGTGTCTTCTAT						1.182	0.353	0	56.4
2155	Ca	SS	2776	STCa-10738	CATGGAAATTTATGCGACCGTTCAAG						1.182	0.353	0	56.4
2156	Ca	SS	2778	STCa-10750	CATGGAACAATACCAAGTTCAAAAGG	HIS7_PEA	HIS7	0.0001	Imidazoleglycerol-phosphate dehydratase (EC 4.2.1.19) (IGPD)	GO:0004424,GO:0016829,GO:0000105,GO:0008652	1.182	0.353	0	56.4
2157	Ca	SS	2780	STCa-10770	CATGGAACATTGCAGTTGGAGAGTTT	Q6UD73_MEDTR	Q6UD73	0.026	LysM domain-containing receptor-like kinase 3 (RLK)	GO:0004672,GO:0005524,GO:0004872,GO:0004674,GO:0004713,GO:0016301,GO:0006468,GO:0016998	1.182	0.353	0	56.4
2158	Ca	SS	2781	STCa-10822	CATGGAACTGTTGTAAATTACTGTAG						1.182	0.353	0	56.4
11456	Ca	SS	2782	STCa-10826	CATGGAACTTCATTAAAGCACGAGTT						1.182	0.353	0	56.4
2160	Ca	SS	2784	STCa-10829	CATGGAACTTGTAGATATATTATTGG	Q94CL7_ARATH	Q94CL7	2e-05	Phosphate starvation response regulator 1	GO:0003677,GO:0045449,GO:0005634	1.182	0.353	0	56.4
17282	Ca	SS	2785	STCa-10830	CATGGAACTTTAATATTAAACCTATG						1.182	0.353	0	56.4
9276	Ca	SS	2786	STCa-10833	CATGGAACTTTTAATTAATAATAATC						1.182	0.353	0	56.4
2163	Ca	SS	2788	STCa-10839	CATGGAAGAAACCAATCTTTGGGTGG						1.182	0.353	0	56.4
2164	Ca	SS	2789	STCa-10843	CATGGAAGAAATAAGACAAAAGTTGA						1.182	0.353	0	56.4
12006	Ca	SS	2790	STCa-10866	CATGGAAGAGATACAATTTGAGCAGA	Q3S4G9_SOYBN	Q3S4G9	3e-05	Enzymatic resistance protein	GO:0008483,GO:0008152	1.182	0.353	0	56.4	0.501381
2166	Ca	SS	2791	STCa-10882	CATGGAAGATAGGAAATTGAAGCTTT						1.182	0.353	0	56.4
2167	Ca	SS	2792	STCa-10926	CATGGAAGCTTGTCTATGTTATAGCT						1.182	0.12	69.2	226
2168	Ca	SS	2799	STCa-11042	CATGGAATATTTTTTCCAAAGAATAG						1.182	0.353	0	56.4
2169	Ca	SS	2800	STCa-11117	CATGGAATGTAATATGTTTTGTTTCT	Q9M442_CICAR	Q9M442	4e-07	Putative imbibition protein	GO:	1.182	0.353	0	56.4
2170	Ca	SS	2801	STCa-11120	CATGGAATGTATTAGTGCTGTGGAAA						1.182	0.353	0	56.4
2171	Ca	SS	2802	STCa-11128	CATGGAATGTTCAGAAAGAGCTATTC	Q5Z876_ORYSA	Q5Z876	2e-05	Proteasome activator subunit 4-like	GO:0043234,GO:0005829	1.182	0.353	0	56.4
2172	Ca	SS	2803	STCa-11131	CATGGAATGTTGTAACTAGTAAGAAT	Q9FXD7_ARATH	Q9FXD7	0.009382	F12A21.14	GO:0004672,GO:0005524,GO:0016491,GO:0004674,GO:0004713,GO:0005515,GO:0008152,GO:0006468	1.182	0.353	0	56.4
2173	Ca	SS	2804	STCa-11147	CATGGAATTCGAGCAGAAATTTTTTT						1.182	0.353	0	56.4
2174	Ca	SS	2805	STCa-11154	CATGGAATTGAATTCGAGCAGAAATG						1.182	0.353	0	56.4
1294	Ca	SS	2806	STCa-11186	CATGGAATTTTCCCTAGTACAATATA						1.182	0.353	0	56.4
25786	Ca	SS	2808	STCa-11196	CATGGACAAAAAAGTTTTACCCCGAG						1.182	0.353	0	56.4
2177	Ca	SS	2810	STCa-11216	CATGGACAAGATATTTTAAGAAAATT						1.182	0.353	0	56.4
2178	Ca	SS	2813	STCa-11218	CATGGACAAGGATGTATTTTCTTCAG	Q7PVN0_ANOGA	Q7PVN0	9e-06	ENSANGP00000010532 (Fragment)	GO:3676	1.182	0.353	0	56.4
2179	Ca	SS	2814	STCa-11343	CATGGACCAATGCTAAATTTGTTCAT						1.182	0.332	34.6	113
2180	Ca	SS	2815	STCa-11524	CATGGACTACTTTAATATTAAACCTA						1.182	0.353	0	56.4
2181	Ca	SS	2816	STCa-11560	CATGGACTAGTAGTGATTGGTAAGGG	Q6NMI5_ARATH	Q6NMI5	0.002	At2g19660	GO:0008270,GO:0007242	1.182	0.332	34.6	113
2182	Ca	SS	2818	STCa-11587	CATGGACTGATATGCCTTACGAAGGC						1.182	0.353	0	56.4
4408	Ca	SS	2819	STCa-11612	CATGGACTTAATGCTGGAGATTCATC	Q8GWT0_ARATH	Q8GWT0	0.009382	Putative beta-1,3-glucanase (At2g26600)	GO:0003824,GO:0004553,GO:0043169,GO:0005975	1.182	0.353	0	56.4
2184	Ca	SS	2820	STCa-11629	CATGGACTTGATAGAATAAGTGGTTT	Q8LKQ7_ARATH	Q8LKQ7	0.004	VTC2	GO:	1.182	0.353	0	56.4
17425	Ca	SS	2821	STCa-11635	CATGGACTTGGTGGTGATAATTTTAG	Q9LN68_ARATH	Q9LN68	1e-06	F18O14.2 (At1g19300) (At1g19300/F18O14_13)	GO:0016758,GO:0016051	1.182	0.353	0	56.4
2186	Ca	SS	2822	STCa-11642	CATGGAGAAAAAAGATAAGGGATTGG						1.182	0.353	0	56.4
2187	Ca	SS	2823	STCa-11669	CATGGAGAAGGAGCAGAAGGTGGAGG	Q1SAY0_MEDTR	Q1SAY0	5e-07	DNA-directed RNA polymerase, subunit C11/M/9	GO:0003899,GO:0003677,GO:0030528,GO:0003702,GO:0008270,GO:0006354,GO:0006350,GO:0045449,GO:0006355	1.182	0.353	0	56.4
2188	Ca	SS	2826	STCa-11677	CATGGAGAAGGTCTTGGAAGATTGAA						1.182	0.353	0	56.4
17508	Ca	SS	2827	STCa-11701	CATGGAGACCTTGAATGAAATTAATA						1.182	0.353	0	56.4
2190	Ca	SS	2828	STCa-11728	CATGGAGAGGACATCTTTCAAAGAAC	Q9FIJ2_ARATH	Q9FIJ2	2e-05	NADH dehydrogenase 10.5K chain-like protein	GO:	1.182	0.332	34.6	113	0.0217615
2191	Ca	SS	2829	STCa-11762	CATGGAGATGATTTAGTATATTGATA	HMGB2_RAT	P52925	2e-05	High mobility group protein B2 (High mobility group protein 2) (HMG- 2) (HMG)	GO:0003677,GO:0003690,GO:0003697,GO:0008289,GO:0008301,GO:0006268,GO:0006334,GO:0007399,GO:0006288,GO:0006325,GO:0006260,GO:0006355,GO:0006357,GO:0006281,GO:0005737,GO:0000793,GO:0000785,GO:0005694,GO:0048471,GO:0005634	1.182	0.353	0	56.4
2192	Ca	SS	2830	STCa-11793	CATGGAGCAGAGATCATTCCCATTAA	Q9LT18_ARATH	Q9LT18	7e-05	Dbj|BAA18864.1	GO:	1.182	0.353	0	56.4
6479	Ca	SS	2831	STCa-11824	CATGGAGCTACACGCAGCATTGGCGA						1.182	0.353	0	56.4
2194	Ca	SS	2832	STCa-11853	CATGGAGCTCGGAATTTTGTTTCTTA						1.182	0.353	0	56.4
2195	Ca	SS	2833	STCa-11861	CATGGAGCTGCGAGACAATTGGAATC						1.182	0.353	0	56.4
76	Ca	SS	2834	STCa-11877	CATGGAGGAAGATGCTGTCTAAGGAT						1.182	0.353	0	56.4
2197	Ca	SS	2835	STCa-11914	CATGGAGGATATCAGATTCACTGATC						1.182	0.353	0	56.4
2198	Ca	SS	2837	STCa-11972	CATGGAGGTCAGAGCGTCTCGCTAAG	Q6RIB7_SOYBN	Q6RIB7	0.009	Enolase (EC 2.3.1.16)	GO:0000287,GO:0003988,GO:0016740,GO:0004634,GO:0016829,GO:0008415,GO:0006096,GO:0000015	1.182	0.353	0	56.4
2199	Ca	SS	2838	STCa-11977	CATGGAGGTGAAATGACCCAGTTGGA						1.182	0.353	0	56.4
2200	Ca	SS	2839	STCa-12003	CATGGAGTACTTGCTTAGGAATCTTA						1.182	0.353	0	56.4
2201	Ca	SS	2840	STCa-12048	CATGGAGTGGGTCTAAGTTAAAGTGG						1.182	0.353	0	56.4
17574	Ca	SS	2841	STCa-12049	CATGGAGTGGGTCTAAGTTAAGTGGT						1.182	0.353	0	56.4
2203	Ca	SS	2842	STCa-12070	CATGGAGTTGAGTGTTTTATTACTTG						1.182	0.353	0	56.4
2204	Ca	SS	2843	STCa-12082	CATGGAGTTTGAATTCGAGCAGAAAC						1.182	0.353	0	56.4
2205	Ca	SS	2844	STCa-12092	CATGGAGTTTGCCCTTATGGAGCGTT	O81924_CICAR	O81924	0.007	Glyceraldehyde 3-phosphate dehydrogenase, cytosolic	GO:0016491,GO:0004365,GO:0051287,GO:0006096	1.182	0.353	0	56.4
2206	Ca	SS	2847	STCa-12147	CATGGATACTGACACAGATACATTGA						1.182	0.353	0	56.4
2207	Ca	SS	2848	STCa-12149	CATGGATACTTCTAATTGTATTCGAG						1.182	0.353	0	56.4
2208	Ca	SS	2849	STCa-12173	CATGGATATCAAACCACGAACTTGTT						1.182	0.353	0	56.4
2209	Ca	SS	2850	STCa-12181	CATGGATATGAAATGTAGATATTGAA						1.182	0.353	0	56.4
2210	Ca	SS	2854	STCa-12183	CATGGATATGCTAGGCTTTTTATTGC						1.182	0.353	0	56.4
77	Ca	SS	2857	STCa-12231	CATGGATCATAGAACAAGATGCAGTT						1.182	0.353	0	56.4
2212	Ca	SS	2859	STCa-12247	CATGGATCCCAGGCTCGATTTCTTCT	O23275_ARATH	O23275	7e-08	Transport protein	GO:0005515,GO:0008270,GO:0006886,GO:0006888,GO:0030127	1.182	0.353	0	56.4
2213	Ca	SS	2860	STCa-12260	CATGGATCGTGAGTTCTTCTATTTTT						1.182	0.353	0	56.4
2214	Ca	SS	2861	STCa-12288	CATGGATCTGGATTGTACTTGTGGGA						1.182	0.332	34.6	113
2215	Ca	SS	2862	STCa-12300	CATGGATGAAGCAACAGCATCAGTTG	MRP4_ARATH	O24525	7e-08	Multidrug resistance-associated protein 4 (EC 3.6.3.44) (Glutathione S-conjugate-transporting ATPase 4) (ATP-energized glutathione S- conjugate pump 4)	GO:0008559,GO:0005524,GO:0000166,GO:0017111,GO:0016787,GO:0016887,GO:0042626,GO:0006810,GO:0016020,GO:0016021	1.182	0.353	0	56.4
2216	Ca	SS	2863	STCa-12359	CATGGATGCGGCTTCTTCTGTGCTTT						1.182	0.353	0	56.4
2217	Ca	SS	2864	STCa-12460	CATGGATTAAAGATTCAGTTGAGTAT						1.182	0.353	0	56.4
2218	Ca	SS	2865	STCa-12476	CATGGATTATATGTATCACAATATTT						1.182	0.332	34.6	113
2219	Ca	SS	2868	STCa-12485	CATGGATTCACATTGGATATTGAGAG						1.182	0.353	0	56.4
2220	Ca	SS	2870	STCa-12488	CATGGATTCAGGTTGGAAGAGAGGAT						1.182	0.353	0	56.4
2221	Ca	SS	2871	STCa-12492	CATGGATTCTCCTAGCAAATCTCACA						1.182	0.353	0	56.4
2222	Ca	SS	2873	STCa-12527	CATGGATTGTAGAATTTTTGCATTAC						1.182	0.353	0	56.4
[truncated: 15,497 more rows]
