# Supplementary material for: SuperSAGE: the drought stress-responsive transcriptome of chickpea roots
Source: BMC Genomics. 2008 Nov 24;9:553. doi: 10.1186/1471-2164-9-553 (PMC2628679; doi:10.1186/1471-2164-9-553)
Supplement: Additional file 2 — Chickpea in silico tags annotation [file 1471-2164-9-553-S2.xls]

## Sheet: Blast I vs II
In silico Tag information			In silico Tag direct annotation NCBI nr (best hit)					Best Homology in M. truncatula ESTs database (NCBI)				Annotation after blasting the corresponding M.truncatula best homology EST hit (NCBI) against the nr nucleotide database (NCBI)					Correlation between in silico chickpea tags and M.truncatula ESTs (NCBI) annotation
Internal ID	In silico Tag sequence	db ID	E-value	NCBI description (entrez) excluding annonymous hits	gb / dbj / emb ID	Protein name (Uniprot)	Uniprot ID	db	E-value	mismatches	gaps	gb/emb/dbj	E-Value	Nucleotide description (entrez) excluding annonymous hits	Protein name (uniprot)	Uniprot ID	Direct ID direct correlation	Name/description correlation
1	CATGGTATGGTATTGAGCAAGAGTAT	FE672153.1	8e-07	Arachis hypogaea clone 1P23 glutamine synthetase GS56 mRNA, partial cds	DQ889533	-	-	-	-	-	-	-	-	-	-	-	-	-
2	CATGGCACCTTCTGTGAAATTACAAA	FE672151.1	-	-	-	-	-	CX519350	3e-07	0	0	EU165372	0	Glycine max alanine aminotransferase 2 (AlaAT2) mRNA, complete cds	Alanine aminotransferase 2	A8IKE5_SOYBN	-	-
3	CATGCTATGTCACTGTTAGAGGTGAT	FE672148.1	5e-05	Cicer arietinum mRNA for ribosomal protein RL5 (rl5 gene)	AJ515029	Ribosomal protein RL5	Q8GTE2_CICAR	-	-	-	-	-	-	-	-	-	-	-
4	CATGCAGCTGAATCTGATCTCTCACC	FE672147.1	-	-	-	-	-	-	-	-	-	-	-	-	-	-	-	-
5	CATGATTTAGACTTAGGCCTTATTTC	FE672145.1	-	-	-	-	-	-	-	-	-	-	-	-	-	-	-	-
6	CATGTGGATGTTGAGTTTGCAACAGA	FE672144.1	-	-	-	-	-	-	-	-	-	-	-	-	-	-	-	-
7	CATGGGGCATACCACGGAGGGAGTGG	FE672143.1	-	-	-	-	-	-	-	-	-	-	-	-	-	-	-	-
8	CATGGTAATACGAAGCATTAAGGGTG	FE672142.1	-	-	-	-	-	-	-	-	-	-	-	-	-	-	-	-
9	CATGCACTCAAATATTTCATTTGCTA	FE672141.1	-	-	-	-	-	-	-	-	-	-	-	-	-	-	-	-
10	CATGGTTGTAGACAATGTTTTAGAGG	FE672140.1	-	-	-	-	-	-	-	-	-	-	-	-	-	-	-	-
11	CATGGAGAAAGTTGCTTATGAATAAA	FE672139.1	-	-	-	-	-	-	-	-	-	-	-	-	-	-	-	-
12	CATGAGAACCCTTCTGTCGATGCTCT	FE672138.1	-	-	-	-	-	-	-	-	-	-	-	-	-	-	-	-
13	CATGGGAAGTCACGGCTATGGTGTCA	FE672137.1	-	-	-	-	-	-	-	-	-	-	-	-	-	-	-	-
14	CATGGTCTCTTCCATCACAAAAAAAA	FE672136.1	-	-	-	-	-	-	-	-	-	-	-	-	-	-	-	-
15	CATGTTGCGGCGGAGGATATGCCGGA	FE672135.1	-	-	-	-	-	-	-	-	-	-	-	-	-	-	-	-
16	CATGAAATGTTACACAATATATCCCA	FE672134.1	-	-	-	-	-	-	-	-	-	-	-	-	-	-	-	-
17	CATGACTAGAATTCCCATTAGCTCTT	FE672133.1	-	-	-	-	-	-	-	-	-	-	-	-	-	-	-	-
18	CATGCTGCCACACCAACTTCCACATT	FE672132.1	-	-	-	-	-	-	-	-	-	-	-	-	-	-	-	-
19	CATGCTCTTCATAAGAAATCTCTTGA	FE672131.1	-	-	-	-	-	EV260348	3e-07	0	0	DQ889525	1e-58	Arachis hypogaea clone 1W74 fiber annexin mRNA, partial cds	-	-	-	-
20	CATGACTCTGATCAACGAACCGAAGC	FE672130.1	-	-	-	-	-	-	-	-	-	-	-	-	-	-	-	-
21	CATGCTCAAAGTATCCTTGCTATATG	FE672129.1	8e-07	Cicer arietinum mRNA for chlorophyll a/b binding protein	AJ131044	Chlorophyll a/b binding protein precursor	Q9ZP08_CICAR	-	-	-	-	-	-	-	-	-	-	-
22	CATGTTGGTGATGGAAGGGAAGGTTG	FE672128.1	-	-	-	-	-	-	-	-	-	-	-	-	-	-	-	-
23	CATGGTAAAGATGGATTAGGGAACAT	FE672127.1	-	-	-	-	-	-	-	-	-	-	-	-	-	-	-	-
24	CATGTTGGTGAATTAGGTGCTGCCAC	FE672126.1	-	-	-	-	-	-	-	-	-	-	-	-	-	-	-	-
25	CATGATGGTAATGTTGGTACTTTTTT	FE672125.1	-	-	-	-	-	-	-	-	-	-	-	-	-	-	-	-
26	CATGTAAAATGTNAGCAAGCTTGGAC	FE672124.1	-	-	-	-	-	-	-	-	-	-	-	-	-	-	-	-
27	CATGTGTGGAGAGCAGGGGATGAGTC	FE672123.1	-	-	-	-	-	-	-	-	-	-	-	-	-	-	-	-
28	CATGACGCGTCGGAGTTCATCCTCCG	FE672122.1	-	-	-	-	-	-	-	-	-	-	-	-	-	-	-	-
29	CATGGGTATTCAGAGCTTGGTTGACA	FE672121.1	8e-07	Cicer arietinum mRNA for class I chitinase	AJ012821	Class I chitinase precursor; ( EC=3	Q9ZP10_CICAR	-	-	-	-	-	-	-	-	-	-	-
30	CATGGACGAAACAGGAGCTGGGCTGC	FE672119.1	-	-	-	-	-	-	-	-	-	-	-	-	-	-	-	-
31	CATGACCAGGCAATGCCGACATCGGA	FE672118.1	-	-	-	-	-	-	-	-	-	-	-	-	-	-	-	-
32	CATGGCTCAGCGGATCGTCTCCGCCG	FE672115.1	-	-	-	-	-	-	-	-	-	-	-	-	-	-	-	-
33	CATGGCTGCTGCCATCAAGGATAGAA	FE672114.1	8e-07	Pisum sativum mRNA for GTP-binding protein, complete cds, clone:pra9B	D12549	GTP-binding protein	Q08154_PEA	BG451950	3e-07	0	0	D12549	0	Pisum sativum mRNA for GTP-binding protein, complete cds, clone:pra9B	GTP-binding protein	Q08154_PEA	correlated ID	-
34	CATGGCTTGCAATTCAACACCCCTCT	FE672111.1	-	-	-	-	-	-	-	-	-	-	-	-	-	-	-	-
35	CATGGACCAAACTTGGGTTACCCAAG	FE672109.1	8e-07	Cicer arietinum mRNA for chlorophyll a/b binding protein	AJ131044	Chlorophyll a/b binding protein precursor	Q9ZP08_CICAR	DY615474	3e-07	0	0	AF072931	0	Medicago sativa chlorophyll a/b binding protein (CARCAB1) mRNA, complete cds	Chlorophyll a/b binding protein	O81391_MEDSA	no	Correlated protein name
36	CATGTTTGAAACAATCTAAGATAATA	FE672108.1	-	-	-	-	-	-	-	-	-	-	-	-	-	-	-	-
37	CATGGTTGGGCTAATTTTGCCAAAAT	FE672107.1	-	-	-	-	-	-	-	-	-	-	-	-	-	-	-	-
38	CATGCCCCCTACAGGAGGATAACGAT	FE672105.1	-	-	-	-	-	-	-	-	-	-	-	-	-	-	-	-
39	CATGTACTGTCCAATTCTTGACAAGA	FE672103.1	-	-	-	-	-	-	-	-	-	-	-	-	-	-	-	-
40	CATGAAAAAGCTCGAAGAAGCAGTGA	FE672100.1	-	-	-	-	-	DY617756	8e-05	1	0	AY444796	0	Pisum sativum translational elongation factor 1 subunit Bbeta (eEF1Bbeta) mRNA, complete cds	Translational elongation factor 1 subunit Bbeta	Q6SZ89_PEA	-	-
41	CATGAGACCACCTCAATCACAGGGTA	FE672098.1	-	-	-	-	-	-	-	-	-	-	-	-	-	-	-	-
42	CATGGAAGCATACTTAAGATGCAGCG	FE672096.1	-	-	-	-	-	-	-	-	-	-	-	-	-	-	-	-
43	CATGACACGTTTAACCTACACGCTCG	FE672095.1	-	-	-	-	-	DY632683	8e-05	1	0	D13297	0	Pisum sativum mRNA for precursor for 33-kDa protein of photosystem II, complete cds	Oxygen-evolving enhancer protein 1, chloroplastic precursor; ( Short=OEE1; AltName	PSBO_PEA	-	-
44	CATGCTTTTCCATTAGTGAATTAAGA	FE672094.1	-	-	-	-	-	-	-	-	-	-	-	-	-	-	-	-
45	CATGACTGGTTCTTGTTTCGCCGCCG	FE672093.1	-	-	-	-	-	-	-	-	-	-	-	-	-	-	-	-
46	CATGCTCTCATTGGCGAGCCTACTAG	FE672092.1	-	-	-	-	-	-	-	-	-	-	-	-	-	-	-	-
48	CATGTTCCTCGCCGATTCAAGAGTGG	FE672090.1	-	-	-	-	-	-	-	-	-	-	-	-	-	-	-	-
49	CATGAATTTCCTTTCACTTCCGTGAT	FE672089.1	-	-	-	-	-	-	-	-	-	-	-	-	-	-	-	-
50	CATGGTGAAGAAGAATATAAGACCAT	FE672088.1	-	-	-	-	-	-	-	-	-	-	-	-	-	-	-	-
51	CATGGAGTCAAATTGGGACTTATGTC	FE672087.1	-	-	-	-	-	-	-	-	-	-	-	-	-	-	-	-
53	CATGATATTATTGTCCTGAGGAGCTC	FE672084.1	-	-	-	-	-	-	-	-	-	-	-	-	-	-	-	-
54	CATGACAGACTTGTATAATAACTTGC	FE672083.1	-	-	-	-	-	-	-	-	-	-	-	-	-	-	-	-
55	CATGACCATAATTACCACCACCATTG	FE672082.1	8e-07	Cicer arietinum mRNA for glycine-rich protein 2, partial	AJ012829	Glycine-rich protein 2 (Fragment)	Q9ZRV2_CICAR	-	-	-	-	-	-	-	-	-	-	-
56	CATGACACCTTTGACTTCAGAAACCT	FE672080.1	-	-	-	-	-	-	-	-	-	-	-	-	-	-	-	-
57	CATGTTTACTGGGCCTCGGTGCCTGC	FE672079.1	-	-	-	-	-	-	-	-	-	-	-	-	-	-	-	-
59	CATGGTACCTTTCCAACCTACCAGCC	FE672077.1	-	-	-	-	-	-	-	-	-	-	-	-	-	-	-	-
60	CATGATGATGAGCCTCCTCTCTCCCA	FE672075.1	-	-	-	-	-	-	-	-	-	-	-	-	-	-	-	-
61	CATGGATTCTTTTTTTAACCCTTTGC	FE672074.1	-	-	-	-	-	-	-	-	-	-	-	-	-	-	-	-
62	CATGAATGCTCCATCTGTCATAAATC	FE672073.1	-	-	-	-	-	-	-	-	-	-	-	-	-	-	-	-
63	CATGGCCATTAAGGCTCAGATCTATG	FE672072.1	-	-	-	-	-	-	-	-	-	-	-	-	-	-	-	-
64	CATGTAACGGCCTTCTCTGCATCTGT	FE672071.1	-	-	-	-	-	-	-	-	-	-	-	-	-	-	-	-
65	CATGGGAGGATGAAGAGGAGTCCACT	FE672068.1	-	-	-	-	-	-	-	-	-	-	-	-	-	-	-	-
66	CATGCAAGAGCCAGTTGTGAAGATGT	FE672067.1	-	-	-	-	-	-	-	-	-	-	-	-	-	-	-	-
67	CATGTGAAATCAGCATCATCTCTACC	FE672063.1	8e-07	Medicago sativa subsp. falcata S-adenosyl-L-methionine synthetase (SAMS) mRNA, complete cds	EF408868	S-adenosylmethionine synthetase; ( EC=2	A4ULF8_MEDFA	DY616817	3e-07	0	0	EF408868	0	Medicago sativa subsp. falcata S-adenosyl-L-methionine synthetase (SAMS) mRNA, complete cds	S-adenosylmethionine synthetase; ( EC=2.5.1.6)	A4ULF8_MEDFA	correlated ID	-
68	CATGCCGCTGGCTCGCAAAATCGAGG	FE672062.1	-	-	-	-	-	-	-	-	-	-	-	-	-	-	-	-
69	CATGATGATGACTTGGGAAGTGAAGT	FE672061.1	8e-07	Cicer arietinum mRNA for elongation factor 1-alpha (EF1-a)	AJ004960	Elongation factor 1-alpha (EF1-a) (Fragment)	O81921_CICAR	EV262630	3e-07	0	0	AJ222579	0	Vicia faba mRNA for elongation factor 1-alpha (EF1-a)	Elongation factor 1-alpha; ( Short=EF-1-alpha)	EF1A_VICFA	no	Correlated protein name
70	CATGAGATGAGACAATGATCTTCTAA	FE672060.1	-	-	-	-	-	-	-	-	-	-	-	-	-	-	-	-
71	CATGAGTGTTACCTAGCTTTGCCAGT	FE672059.1	-	-	-	-	-	-	-	-	-	-	-	-	-	-	-	-
72	CATGTAGTGCAAGAAGATGATGATGA	FE672058.1	-	-	-	-	-	-	-	-	-	-	-	-	-	-	-	-
73	CATGGAGCCAATGGTAACACCAAGGA	FE673400.1	-	-	-	-	-	-	-	-	-	-	-	-	-	-	-	-
74	CATGAAGTGCTGGTGATAGGTATTTT	FE673399.1	-	-	-	-	-	-	-	-	-	-	-	-	-	-	-	-
75	CATGGACATAAATTCAAGTTGTTTCG	FE673398.1	-	-	-	-	-	-	-	-	-	-	-	-	-	-	-	-
76	CATGAAAAAGAAAAAAGCTTGGGGTG	FE673397.1	-	-	-	-	-	-	-	-	-	-	-	-	-	-	-	-
78	CATGTTCACCACGTTTCTTCTTAACC	FE673391.1	-	-	-	-	-	-	-	-	-	-	-	-	-	-	-	-
79	CATGTTTTGGCCCCCCCCAAAAAAAA	FE673390.1	-	-	-	-	-	-	-	-	-	-	-	-	-	-	-	-
80	CATGGCTCTCTCTTCGGGAACTTTAG	FE672921.1	-	-	-	-	-	-	-	-	-	-	-	-	-	-	-	-
81	CATGCAATATATACCCTAGTTGCCAA	FE672919.1	-	-	-	-	-	-	-	-	-	-	-	-	-	-	-	-
82	CATGGTGGTGACGGGTGACGGACAAT	FE672917.1	-	-	-	-	-	DW016149	8e-05	0	0	AJ577394	0	Cicer arietinum 18S rRNA gene, 5.8S rRNA gene, IGS, ITS1 and ITS2, clone CanrDNA	-	-	-	-
83	CATGGATTGTGATTAGCACTGTCGCG	FE672916.1	-	-	-	-	-	-	-	-	-	-	-	-	-	-	-	-
84	CATGAGCTCCGCGAGATCAGAAATCT	FE672914.1	-	-	-	-	-	-	-	-	-	-	-	-	-	-	-	-
85	CATGGGTTTTGATGGCCAATGATGTG	FE672913.1	-	-	-	-	-	-	-	-	-	-	-	-	-	-	-	-
86	CATGCATAGTGCCTCTTTAATAGTTT	FE672912.1	-	-	-	-	-	-	-	-	-	-	-	-	-	-	-	-
87	CATGACGGAAACTGGCTCAGGATACA	FE672911.1	-	-	-	-	-	-	-	-	-	-	-	-	-	-	-	-
88	CATGGTGTGGGCCCGCATAGTAAAGT	FE672910.1	-	-	-	-	-	-	-	-	-	-	-	-	-	-	-	-
89	CATGGCGGATGTGATGGTAATGAAAG	FE671673.1	-	-	-	-	-	-	-	-	-	-	-	-	-	-	-	-
90	CATGGCTACACAAGCTCTAGTGTCGT	FE671672.1	3e-06	Pisum sativum chloroplast photosystem I 24 kDa light harvesting protein (lhca3) mRNA, complete cds	L19651	Chlorophyll a-b binding protein 3, chloroplastic precursor; (AltName: Full=LHCII type III CAB-3)	CB23_PEA	DW016742	3e-07	0	0	L19651	3e-167	Pisum sativum chloroplast photosystem I 24 kDa light harvesting protein (lhca3) mRNA, complete cds	Chlorophyll a-b binding protein 3, chloroplastic precursor; (AltName	CB23_PEA	correlated ID	-
91	CATGGAGTTGATCAAACCACAACAGA	FE671669.1	8e-07	Cicer pinnatifidum dehydrin 1 mRNA, complete cds	AY170010	Dehydrin 1	Q8GUS4_9FABA	-	-	-	-	-	-	-	-	-	-	-
92	CATGGAGGAGGATATTGTGGAAATGG	FE671668.1	8e-07	Cicer arietinum mRNA for glycine-rich protein 1	AJ007556	Glycine-rich protein 1 (Fragment)	O81929_CICAR	-	-	-	-	-	-	-	-	-	-	-
93	CATGTGGACGTGTAAGTGCTGCTCTT	FE671663.1	-	-	-	-	-	-	-	-	-	-	-	-	-	-	-	-
94	CATGGTGATGCAAGTGTTGGGTGCTA	FE673388.1	8e-07	Pisum sativum trg-31 gene	Z18288	Probable aquaporin PIP-type 7a; (AltName: Full=Turgor-responsive protein 7a; AltName: Full=Turgor-responsive protein 31)	PIP2_PEA	-	-	-	-	-	-	-	-	-	-	-
95	CATGTGGGGGATATGAAATCTTCAGT	FE673386.1	-	-	-	-	-	-	-	-	-	-	-	-	-	-	-	-
96	CATGTGTCAGGGAGGTGACTTCACCG	FE673385.1	8e-07	Cicer arietinum partial mRNA for cyclophilin-type peptidyl-prolyl cis-trans isomerase (ppi gene)	AJ609278	Cyclophilin-type peptidyl-prolyl cis-trans isomerase (Fragment); ( EC=5	Q708X2_CICAR	BG648440	8e-05	1	0	AB020612	3e-43	Vigna radiata mRNA for CYP1, complete cds	Peptidyl-prolyl cis-trans isomerase; ( EC=5.2.1.8)	Q8W435_9FABA	no	Correlated protein name
97	CATGGCCACTTCTTTCGCACCATTAT	FE673384.1	-	-	-	-	-	-	-	-	-	-	-	-	-	-	-	-
98	CATGGGCCGAACTGAGGAAAAGACCA	FE673383.1	8e-07	Cicer arietinum mRNA for LEA protein (clone CapLEA-1)	AJ224518	Late embryogenesis abundant protein 1; (AltName: Full=CapLEA-1)	LEA1_CICAR	-	-	-	-	-	-	-	-	-	-	-
99	CATGAGGTTACAATCATAGCTAAATC	FE673382.1	-	-	-	-	-	-	-	-	-	-	-	-	-	-	-	-
100	CATGAGCTTATGTCTTTTGCAAGCAA	FE673381.1	-	-	-	-	-	-	-	-	-	-	-	-	-	-	-	-
101	CATGGACTTTCAACCGATTCAGATGT	FE673380.1	-	-	-	-	-	-	-	-	-	-	-	-	-	-	-	-
102	CATGATGGACAAACTGCCAGATGATG	FE672909.1	-	-	-	-	-	-	-	-	-	-	-	-	-	-	-	-
103	CATGCCAATTGAAGATAGTCTAATCA	FE672908.1	-	-	-	-	-	-	-	-	-	-	-	-	-	-	-	-
104	CATGTGGCCTTGTGGTTGATATGATA	FE672907.1	8e-07	Cicer arietinum mRNA for putative Ruv DNA-helicase	AJ276264	Putative Ruv DNA-helicase	Q9M3Z6_CICAR	-	-	-	-	-	-	-	-	-	-	-
105	CATGGCCACTAACCTCAAACCCTTCT	FE672906.1	-	-	-	-	-	-	-	-	-	-	-	-	-	-	-	-
106	CATGCACATATGTCGGCGTGGATGAA	FE672903.1	-	-	-	-	-	-	-	-	-	-	-	-	-	-	-	-
107	CATGATGCAGATGCAGATCTTCGATT	FE672902.1	-	-	-	-	-	-	-	-	-	-	-	-	-	-	-	-
108	CATGTCTCCAAACCCACAGGATCTTT	FE672901.1	-	-	-	-	-	-	-	-	-	-	-	-	-	-	-	-
109	CATGCTGCAAACAAACTTGCAAGCAA	FE671661.1	-	-	-	-	-	-	-	-	-	-	-	-	-	-	-	-
110	CATGCTGTTCTCCGCTGATATTTTTC	FE671659.1	-	-	-	-	-	-	-	-	-	-	-	-	-	-	-	-
112	CATGTTCTGTAAATTTAATGAATTTC	FE671655.1	-	-	-	-	-	-	-	-	-	-	-	-	-	-	-	-
113	CATGGAAGATGTGATGATCGTAACGA	FE671654.1	-	-	-	-	-	-	-	-	-	-	-	-	-	-	-	-
114	CATGGAAAGTTAAGTCTTTTAACAAA	FE671653.1	-	-	-	-	-	-	-	-	-	-	-	-	-	-	-	-
116	CATGTGGTCGAATAGTGAACCCGATT	FE671651.1	-	-	-	-	-	-	-	-	-	-	-	-	-	-	-	-
117	CATGACCCTTCTTATTATCACGTCGA	FE671650.1	-	-	-	-	-	-	-	-	-	-	-	-	-	-	-	-
118	CATGCTGCAGCTGGTGTTGATAGATT	FE673376.1	-	-	-	-	-	-	-	-	-	-	-	-	-	-	-	-
119	CATGGGCCTGGAACTGGGAAAAATTA	FE673375.1	-	-	-	-	-	-	-	-	-	-	-	-	-	-	-	-
120	CATGGAACCGCAAACGGAGAAAAAGA	FE673373.1	-	-	-	-	-	-	-	-	-	-	-	-	-	-	-	-
121	CATGTTTTAGTTTCTCCAATGCAACA	FE673371.1	-	-	-	-	-	-	-	-	-	-	-	-	-	-	-	-
122	CATGGGCGCTTCAGGGGAAGCTAGCA	FE673370.1	-	-	-	-	-	-	-	-	-	-	-	-	-	-	-	-
123	CATGTTCCTCCATACAAGGATAATAT	FE673369.1	-	-	-	-	-	DW015198	8e-05	1	0	AJ717306	0	Pisum sativum mRNA for mitochondrial peroxiredoxin (prx gene)	Mitochondrial peroxiredoxin	Q6KBB1_PEA	-	-
124	CATGGACCAAATATATTTGGAGCTTC	FE673368.1	-	-	-	-	-	-	-	-	-	-	-	-	-	-	-	-
125	CATGGGGGTCGAGATCGTCACACTTG	FE673366.1	-	-	-	-	-	-	-	-	-	-	-	-	-	-	-	-
126	CATGATAAGATTTGTTGCTCCAAAGG	FE672897.1	-	-	-	-	-	-	-	-	-	-	-	-	-	-	-	-
127	CATGAACTTGAGGTCCTATCTTGAGG	FE672894.1	-	-	-	-	-	-	-	-	-	-	-	-	-	-	-	-
128	CATGATATGATAACGGATATGAGTTC	FE672893.1	-	-	-	-	-	-	-	-	-	-	-	-	-	-	-	-
129	CATGTAAGATATTCGCAGTCTATGAT	FE672892.1	-	-	-	-	-	-	-	-	-	-	-	-	-	-	-	-
131	CATGTCTTGTCCTCAGTTTAATTACT	FE672889.1	-	-	-	-	-	-	-	-	-	-	-	-	-	-	-	-
132	CATGATGCATCTTTCACACGGTCATC	FE672888.1	-	-	-	-	-	-	-	-	-	-	-	-	-	-	-	-
133	CATGATGAGGTCCCTCGCGTTATGGA	FE672887.1	-	-	-	-	-	-	-	-	-	-	-	-	-	-	-	-
134	CATGAGCGGGTTCAAACCGGAACTTC	FE671649.1	-	-	-	-	-	-	-	-	-	-	-	-	-	-	-	-
135	CATGTTGTTGAGTCCTTTGATGTTGG	FE671648.1	-	-	-	-	-	-	-	-	-	-	-	-	-	-	-	-
136	CATGGCGGTTTCAGGTTTAAGAACTG	FE671647.1	-	-	-	-	-	-	-	-	-	-	-	-	-	-	-	-
137	CATGTTTAATTACGACAAAATGCAAA	FE671646.1	-	-	-	-	-	-	-	-	-	-	-	-	-	-	-	-
138	CATGGCTTCCCAATCAAACCCCAATT	FE671644.1	-	-	-	-	-	-	-	-	-	-	-	-	-	-	-	-
139	CATGTCAAAAAGGTTTCATCCTGGAT	FE671643.1	-	-	-	-	-	-	-	-	-	-	-	-	-	-	-	-
140	CATGTCATCACACTAGGTAGGTCTGA	FE671642.1	-	-	-	-	-	AL381222	8e-05	0	0	EU036299	1e-08	Glycine max clone A458.p1 putative HECT ubiquitin-protein ligase 3 gene, partial cds	-	-	-	-
141	CATGGTTTTCAGATCCAGATTTCTGC	FE671641.1	-	-	-	-	-	-	-	-	-	-	-	-	-	-	-	-
142	CATGGCGCCAATCAGTCAAGGACACT	FE671640.1	-	-	-	-	-	-	-	-	-	-	-	-	-	-	-	-
144	CATGATCACAATCCACAAGCTGTTGC	FE671638.1	8e-07	Medicago sativa mRNA for cysteine protease, partial (cyp15a gene)	AJ245868	Cysteine protease (Fragment)	Q9STA4_MEDSA	DY617058	8e-05	1	0	X54358	0	P.sativum mRNA of cDNA clone 15a	Cysteine proteinase 15A precursor; ( EC=3.4.22.-; AltName	CYSP_PEA	no	Correlated protein name
146	CATGGAAATTGATTCCTTCTCATTCC	FE673364.1	-	-	-	-	-	-	-	-	-	-	-	-	-	-	-	-
147	CATGTTGCAGACACATAATACTATTT	FE673363.1	-	-	-	-	-	-	-	-	-	-	-	-	-	-	-	-
148	CATGTCTTCCAACAAGTTCTTCACAC	FE673362.1	-	-	-	-	-	-	-	-	-	-	-	-	-	-	-	-
149	CATGGTGGTGGTGGTGGAATGACCGG	FE673360.1	-	-	-	-	-	-	-	-	-	-	-	-	-	-	-	-
150	CATGTAGAGCTTTTCGGATGCTAACT	FE673359.1	-	-	-	-	-	-	-	-	-	-	-	-	-	-	-	-
151	CATGACGCCGCCTTCAACCCCTAAAC	FE673358.1	-	-	-	-	-	-	-	-	-	-	-	-	-	-	-	-
152	CATGAATGATCCATTTCACATACATC	FE673357.1	-	-	-	-	-	-	-	-	-	-	-	-	-	-	-	-
155	CATGGATCGGGCAATCCTTCTGCTCT	FE672885.1	-	-	-	-	-	-	-	-	-	-	-	-	-	-	-	-
156	CATGACCGAAATGTCCTCCGCGTGCT	FE672884.1	-	-	-	-	-	-	-	-	-	-	-	-	-	-	-	-
157	CATGTCAACCTTGGGTTCCCCGCCAT	FE672883.1	-	-	-	-	-	-	-	-	-	-	-	-	-	-	-	-
158	CATGTCGTCGCTTTCTACGCCCTTCC	FE672882.1	-	-	-	-	-	-	-	-	-	-	-	-	-	-	-	-
160	CATGGAATGGAAGTAGTTTCTTACAT	FE672880.1	-	-	-	-	-	-	-	-	-	-	-	-	-	-	-	-
161	CATGACGGAGTCTTAAAATGGATTTC	FE672879.1	-	-	-	-	-	-	-	-	-	-	-	-	-	-	-	-
162	CATGGCTACATCGGCAGGGTTTCCAA	FE672878.1	-	-	-	-	-	-	-	-	-	-	-	-	-	-	-	-
163	CATGGTACGTTCCATACCGTGTGAAG	FE672875.1	-	-	-	-	-	-	-	-	-	-	-	-	-	-	-	-
164	CATGTTGATGTTGATAAGTGGAACGT	FE672874.1	-	-	-	-	-	-	-	-	-	-	-	-	-	-	-	-
165	CATGAATACTAGAAATATGTGCTTCC	FE671636.1	-	-	-	-	-	-	-	-	-	-	-	-	-	-	-	-
166	CATGGTTAAGGAAACACCGTCTTATC	FE671634.1	-	-	-	-	-	-	-	-	-	-	-	-	-	-	-	-
167	CATGCGCGTCACTAATTAGATGACGA	FE671632.1	8e-07	Glycyrrhiza uralensis 26S ribosomal RNA, partial sequence	EF571299	-	-	EX530672	3e-07	0	0	Z11498	0	M.sativa 26S rRNA	-	-	-	Correlated RNA description
168	CATGGGATTCACCTAAAGAACAGATC	FE671630.1	-	-	-	-	-	-	-	-	-	-	-	-	-	-	-	-
169	CATGTATTCAGGAGCTGCATAACCAA	FE671629.1	-	-	-	-	-	-	-	-	-	-	-	-	-	-	-	-
170	CATGGTGCCTCCGGCACGTCCAGCGG	FE671628.1	-	-	-	-	-	-	-	-	-	-	-	-	-	-	-	-
171	CATGAAAGAGCAGGCCATCACAAACC	FE671627.1	-	-	-	-	-	-	-	-	-	-	-	-	-	-	-	-
172	CATGCTTTCCCAAGACAATATTGAAT	FE673351.1	-	-	-	-	-	CF068979	8e-05	1	0	AY488758	6e-05	Pisum sativum short-chain dehydrogenase Tic32 mRNA, complete cds; nuclear gene for chloroplast product	Short-chain dehydrogenase Tic32	Q6RVV4_PEA	-	-
173	CATGCAATGAGCAGTAGACCAAATGA	FE673350.1	-	-	-	-	-	-	-	-	-	-	-	-	-	-	-	-
174	CATGGACTTACAAAATTGTACCCATT	FE673349.1	-	-	-	-	-	-	-	-	-	-	-	-	-	-	-	-
175	CATGTGATTTACCAATCTAAGTGTTT	FE673347.1	-	-	-	-	-	-	-	-	-	-	-	-	-	-	-	-
176	CATGAGCTTTTTCATATATTGCCTCA	FE673346.1	-	-	-	-	-	-	-	-	-	-	-	-	-	-	-	-
177	CATGGTGGTGACGGGTGACGGAGAAT	FE673345.1	8e-07	Vigna radiata 18S ribosomal RNA gene, partial sequence	EU201183	-	-	DW015321	3e-07	0	0	AJ577394	2e-142	Cicer arietinum 18S rRNA gene, 5.8S rRNA gene, IGS, ITS1 and ITS2, clone CanrDNA	-	-	-	Correlated RNA description
178	CATGTTCTTAACAAAGCTATTTTCAA	FE673344.1	-	-	-	-	-	-	-	-	-	-	-	-	-	-	-	-
179	CATGCTTCCCATATAGAAAAATTAAT	FE673343.1	-	-	-	-	-	-	-	-	-	-	-	-	-	-	-	-
180	CATGATTTCTTCCATTGCAGGAATGA	FE673342.1	-	-	-	-	-	-	-	-	-	-	-	-	-	-	-	-
181	CATGATAGGCAAACGCACTAGATCCA	FE672873.1	-	-	-	-	-	-	-	-	-	-	-	-	-	-	-	-
182	CATGGACCTTCACTGGAAGGTTCAAA	FE672872.1	-	-	-	-	-	-	-	-	-	-	-	-	-	-	-	-
183	CATGGGCCGCTGGGGATGTGGTTGAC	FE672870.1	-	-	-	-	-	-	-	-	-	-	-	-	-	-	-	-
184	CATGGGCAGAAAGTGAATTTTCACAT	FE672868.1	-	-	-	-	-	-	-	-	-	-	-	-	-	-	-	-
185	CATGTTTTCTTGTGGTGGAGCCCCGT	FE672867.1	-	-	-	-	-	DY618296	3e-07	0	0	EF375957	9e-07	Cicer arietinum clone CaHa21 unknown protein mRNA, partial cds	Putative uncharacterized protein (Fragment)	B0L637_CICAR	-	-
186	CATGGTCGATAAGGCCCTACGTACAA	FE672866.1	-	-	-	-	-	-	-	-	-	-	-	-	-	-	-	-
187	CATGGAGAGGTCCGCGATAGGGATGT	FE672865.1	-	-	-	-	-	-	-	-	-	-	-	-	-	-	-	-
188	CATGACGACTCAAATGATCAAGAAGA	FE672864.1	-	-	-	-	-	-	-	-	-	-	-	-	-	-	-	-
189	CATGGTCGTGATGATTATCACTATCG	FE672862.1	-	-	-	-	-	-	-	-	-	-	-	-	-	-	-	-
190	CATGAATCTGTAAGGCTTATGCACGA	FE671624.1	-	-	-	-	-	-	-	-	-	-	-	-	-	-	-	-
191	CATGGCCTTTAACATTAAAAGGCTTC	FE671623.1	-	-	-	-	-	-	-	-	-	-	-	-	-	-	-	-
192	CATGATTGGGAGGATAAGGTGCTCTG	FE671621.1	-	-	-	-	-	DY617456	5e-06	0	0	AB012110	4e-95	Vigna radiata mRNA for ARG10, complete cds	ARG10	O64438_PHAAU	-	-
193	CATGTAGGTAGGTATTCTTTTCTCTC	FE671620.1	-	-	-	-	-	-	-	-	-	-	-	-	-	-	-	-
194	CATGGGATGTTGTGTGAATGCTCCAA	FE671617.1	-	-	-	-	-	-	-	-	-	-	-	-	-	-	-	-
195	CATGGCTCCCAAAGGTGATGTTTCAA	FE671615.1	-	-	-	-	-	-	-	-	-	-	-	-	-	-	-	-
196	CATGTTAGTTGCTGCAAGGGTATGAG	FE671614.1	-	-	-	-	-	-	-	-	-	-	-	-	-	-	-	-
197	CATGAAAGTAGGAGATCCCTGATGAC	FE673337.1	-	-	-	-	-	-	-	-	-	-	-	-	-	-	-	-
198	CATGGACATAATATTGGAACGAGAAA	FE673336.1	-	-	-	-	-	-	-	-	-	-	-	-	-	-	-	-
199	CATGAATCTTGGAGATATAGCACGTA	FE673335.1	-	-	-	-	-	-	-	-	-	-	-	-	-	-	-	-
200	CATGTTTGACAATCTTTGAAGTGTTA	FE673334.1	-	-	-	-	-	-	-	-	-	-	-	-	-	-	-	-
201	CATGTCCCCGCATATCTGTCATAACT	FE673332.1	-	-	-	-	-	-	-	-	-	-	-	-	-	-	-	-
202	CATGCTTCACCGCTTTATCTTCCTCA	FE673330.1	-	-	-	-	-	-	-	-	-	-	-	-	-	-	-	-
203	CATGAATGTTTGTTCTCTCTGTAACA	FE672861.1	-	-	-	-	-	-	-	-	-	-	-	-	-	-	-	-
204	CATGTGTCCTAAGATGAGCTCAACGA	FE672859.1	5e-05	Glycyrrhiza uralensis 26S ribosomal RNA, partial sequence	EF571299	-	-	EX532175	2e-05	0	0	Z11498	0	M.sativa 26S rRNA	-	-	-	Correlated RNA description
205	CATGCACCACCTGCTGCACCTAGTCC	FE672856.1	-	-	-	-	-	-	-	-	-	-	-	-	-	-	-	-
206	CATGAATGCCCTTTACAGTTTGCTGG	FE672855.1	-	-	-	-	-	-	-	-	-	-	-	-	-	-	-	-
207	CATGTTGTCTCTGGAGCAAGTGCAGA	FE672854.1	1e-05	Pea mRNA for the 33kDa polypeptide of the water-oxidizing complex of photosystem II	X15350	Oxygen-evolving enhancer protein 1, chloroplastic precursor; ( Short=OEE1; AltName: Full=33 kDa subunit of oxygen evolving system of photosystem II; AltName: Full=OEC 33 kDa subunit; AltName: Full=33 kDa thylakoid membrane protein)	PSBO_PEA	ES611373	2e-05	0	0	X15350	0	Pea mRNA for the 33kDa polypeptide of the water-oxidizing complex of photosystem II	Oxygen-evolving enhancer protein 1, chloroplastic precursor; ( Short=OEE1; AltName	PSBO_PEA	correlated ID	-
208	CATGGTCTGAGTGACGACTTATCTCT	FE672852.1	-	-	-	-	-	-	-	-	-	-	-	-	-	-	-	-
209	CATGGGCGTGCTGCCACAAGTTGTAC	FE671612.1	8e-07	Cicer arietinum partial mRNA for cysteine proteinase (cacG2 gene)	X93220	-	-	CX530549	8e-05	1	0	DQ492683	0	Medicago sativa cysteine protease (CP1) mRNA, complete cds	Cysteine protease; ( EC=3.4.22.2)	Q1KK73_MEDSA	-	Correlated protein name
210	CATGATTCGAGACTTGAAGTCGTCAT	FE671611.1	-	-	-	-	-	-	-	-	-	-	-	-	-	-	-	-
211	CATGGACCTCTTGAGCCTGAGCAGGA	FE671609.1	-	-	-	-	-	EX530656	3e-07	0	0	AY631048	0	Glycine max triosephosphate isomerase mRNA, complete cds	Triosephosphate isomerase; ( EC=5.3.1.1)	Q6GW08_SOYBN	-	-
212	CATGCCACCACGAAGCCTCAAAACCA	FE671606.1	8e-07	Phaseolus vulgaris polyubiquitin mRNA, partial cds	U77940	Polyubiquitin (Fragment)	P93502_PHAVU	CX530787	3e-07	0	0	U77940	3e-139	Phaseolus vulgaris polyubiquitin mRNA, partial cds	Polyubiquitin (Fragment)	P93502_PHAVU	correlated ID	-
213	CATGCTGCTTAAATTTTCCGTGAGGC	FE671605.1	-	-	-	-	-	-	-	-	-	-	-	-	-	-	-	-
215	CATGGCAAACATTGCAAGTCTTCCAT	FE671602.1	-	-	-	-	-	-	-	-	-	-	-	-	-	-	-	-
216	CATGTCTCTCCTGTCGTATTTATGTT	FE673329.1	-	-	-	-	-	-	-	-	-	-	-	-	-	-	-	-
217	CATGTTTAGAACTCAACAAGATGAAA	FE673327.1	-	-	-	-	-	-	-	-	-	-	-	-	-	-	-	-
218	CATGTATATTTAGGTGGGTTCATCTC	FE673326.1	-	-	-	-	-	-	-	-	-	-	-	-	-	-	-	-
219	CATGGTCACGCTCCGTAAGCGAAACA	FE673325.1	-	-	-	-	-	-	-	-	-	-	-	-	-	-	-	-
220	CATGGTTTCTCCCTCACCTTTCCTGG	FE673323.1	-	-	-	-	-	-	-	-	-	-	-	-	-	-	-	-
222	CATGTCTTGGTAATCTTCAAGGTGGT	FE673321.1	-	-	-	-	-	-	-	-	-	-	-	-	-	-	-	-
223	CATGCGCCGGTGGAACTAATTAAAAA	FE673320.1	-	-	-	-	-	-	-	-	-	-	-	-	-	-	-	-
224	CATGTGGGTCCCACCTCTCTCCGCTT	FE673319.1	-	-	-	-	-	AW685417	1e-06	0	0	AB236821	1e-119	Trifolium pratense RNA for putative tetrahydrofolate synthase, complete cds, clone: C2147	Putative tetrahydrofolate synthase	Q2PES9_TRIPR	-	-
225	CATGCTGATAATAATATAGTCATAAT	FE672848.1	-	-	-	-	-	-	-	-	-	-	-	-	-	-	-	-
226	CATGTTGATCCTGCCACAAGCTCCAC	FE672846.1	-	-	-	-	-	-	-	-	-	-	-	-	-	-	-	-
227	CATGCTGTTATTTATGGGGAAAGCAC	FE672842.1	-	-	-	-	-	-	-	-	-	-	-	-	-	-	-	-
228	CATGATACTTCGCAGGAGCCTTTGCC	FE672839.1	-	-	-	-	-	-	-	-	-	-	-	-	-	-	-	-
229	CATGTGATTGACGCACAAATAACGAC	FE672838.1	-	-	-	-	-	-	-	-	-	-	-	-	-	-	-	-
230	CATGCTCGCTCAAAGCGGTAACAACA	FE671601.1	-	-	-	-	-	-	-	-	-	-	-	-	-	-	-	-
231	CATGGCATAAACGTGAGGACTATCGA	FE671600.1	-	-	-	-	-	-	-	-	-	-	-	-	-	-	-	-
232	CATGAGCCCGAAAAGGGCTGTTTGTT	FE671599.1	-	-	-	-	-	-	-	-	-	-	-	-	-	-	-	-
233	CATGGACCCTTCAATACTTCTAACAG	FE671597.1	-	-	-	-	-	-	-	-	-	-	-	-	-	-	-	-
234	CATGATAGCGTTGATACCAGTGAATT	FE671596.1	-	-	-	-	-	-	-	-	-	-	-	-	-	-	-	-
235	CATGACACAGAACGCTCCACGTAAAA	FE671595.1	-	-	-	-	-	-	-	-	-	-	-	-	-	-	-	-
237	CATGGGCCATTCAACTATGGAAACGG	FE671593.1	-	-	-	-	-	-	-	-	-	-	-	-	-	-	-	-
238	CATGGTTGATCCTCTCCTCTTTCTTC	FE671592.1	-	-	-	-	-	-	-	-	-	-	-	-	-	-	-	-
239	CATGATTTCATCTTTTTTTCTTAAAT	FE673317.1	-	-	-	-	-	-	-	-	-	-	-	-	-	-	-	-
240	CATGTCCCTCAAAAACTCCAAACACC	FE673314.1	-	-	-	-	-	-	-	-	-	-	-	-	-	-	-	-
241	CATGTAAAAGAGTTCAACTTTAGAGT	FE673313.1	-	-	-	-	-	-	-	-	-	-	-	-	-	-	-	-
242	CATGCAGGATGATAGCGCCTATTCTC	FE673312.1	-	-	-	-	-	EV256813	2e-05	0	0	X76269	6e-147	P.sativum mRNA for thioredoxin M	Thioredoxin M-type, chloroplastic precursor; ( Short=Trx-M)	TRXM_PEA	-	-
243	CATGGCCATTGAAGTTTTGCTTGGTG	FE673311.1	-	-	-	-	-	-	-	-	-	-	-	-	-	-	-	-
244	CATGGCTAACACCCCAAGCACTCTTG	FE673310.1	-	-	-	-	-	-	-	-	-	-	-	-	-	-	-	-
245	CATGTCTTTGGCCGAACAAGGTGCAG	FE673309.1	-	-	-	-	-	-	-	-	-	-	-	-	-	-	-	-
246	CATGACCGCTGGGAAATTGAAATGTA	FE673308.1	-	-	-	-	-	-	-	-	-	-	-	-	-	-	-	-
247	CATGGGATTCTTGTTCAGCTACCTTT	FE673306.1	-	-	-	-	-	BQ123966	8e-05	1	0	AB236821	0	Trifolium pratense RNA for putative tetrahydrofolate synthase, complete cds, clone: C2147	Putative tetrahydrofolate synthase	Q2PES9_TRIPR	-	-
248	CATGTCTGGTCCCACAGACACTCTCC	FE672837.1	-	-	-	-	-	-	-	-	-	-	-	-	-	-	-	-
249	CATGTACTAGATCCAGCGAAACCACG	FE672836.1	-	-	-	-	-	-	-	-	-	-	-	-	-	-	-	-
250	CATGGGTCGTATGCACAGTCGCGGTA	FE672833.1	-	-	-	-	-	-	-	-	-	-	-	-	-	-	-	-
251	CATGGCTTCACCTGGTTCAGCCCAAA	FE672831.1	-	-	-	-	-	-	-	-	-	-	-	-	-	-	-	-
252	CATGATTTTCAAACAAGTCGGGGGAA	FE672830.1	-	-	-	-	-	-	-	-	-	-	-	-	-	-	-	-
253	CATGCGGCACTACCAAGTTGCTTCTG	FE672829.1	-	-	-	-	-	-	-	-	-	-	-	-	-	-	-	-
254	CATGGAGAGAAGAAAGGGATTATGGA	FE671589.1	8e-07	Pisum sativum dehydrin 3 (Dhn3) mRNA, complete cds	U91970	Dehydrin 3	O04118_PEA	-	-	-	-	-	-	-	-	-	-	-
255	CATGGCGGTGCTGTTTTTGGCGGCGA	FE671588.1	-	-	-	-	-	EY478912	3e-07	0	0	AC187645	1e-10	Glycine max clone gmp1-49d18, complete sequence	-	-	-	-
256	CATGTTATTTGGTACCTAAAAAAATA	FE671587.1	-	-	-	-	-	-	-	-	-	-	-	-	-	-	-	-
257	CATGGGATTGTTGCAAAGAAGCCCAT	FE671586.1	-	-	-	-	-	-	-	-	-	-	-	-	-	-	-	-
258	CATGCTCAAAACGCTTGTGGTGTTTC	FE671585.1	-	-	-	-	-	-	-	-	-	-	-	-	-	-	-	-
259	CATGTCCCTTATGATTCATAGCTGAA	FE671584.1	-	-	-	-	-	-	-	-	-	-	-	-	-	-	-	-
260	CATGAACACAAATTCAAGTTGTTTTG	FE671582.1	-	-	-	-	-	-	-	-	-	-	-	-	-	-	-	-
261	CATGCGCCGTTACTTTGAAACAGTTG	FE671581.1	-	-	-	-	-	-	-	-	-	-	-	-	-	-	-	-
262	CATGGTATTTTTCAGCGAAACAGTAA	FE671580.1	-	-	-	-	-	-	-	-	-	-	-	-	-	-	-	-
263	CATGATTTTTCAGAGAGAGAGAGAGA	FE671579.1	-	-	-	-	-	-	-	-	-	-	-	-	-	-	-	-
264	CATGTGTCATTGACTTTAAATATATT	FE672441.1	-	-	-	-	-	-	-	-	-	-	-	-	-	-	-	-
265	CATGCTTCGGATTTTTGGGAGAGATA	FE672437.1	-	-	-	-	-	-	-	-	-	-	-	-	-	-	-	-
266	CATGCTTTCTTTGTTATGAATAATCT	FE672435.1	-	-	-	-	-	-	-	-	-	-	-	-	-	-	-	-
267	CATGATCCCGAACCTGGATCTGTCAC	FE672434.1	-	-	-	-	-	-	-	-	-	-	-	-	-	-	-	-
268	CATGGAAGAGATACAATTTGAGCTTA	FE672433.1	8e-07	Glycine max enzymatic resistance protein mRNA, complete cds	DQ167250	Enzymatic resistance protein	Q3S4G9_SOYBN	DW019276	8e-05	1	0	DQ167250	0	Glycine max enzymatic resistance protein mRNA, complete cds	Enzymatic resistance protein	Q3S4G9_SOYBN	correlated ID	-
269	CATGAATCATCAAAGCAACAGGCAGA	FE672432.1	8e-07	Spartium junceum isolate HPSUMS 280 18S ribosomal RNA gene, partial sequence	EU605787	-	-	AJ496815	3e-07	0	0	AF071069	0	Trifolium repens 18S ribosomal RNA gene, partial sequence	-	-	-	Correlated RNA description
270	CATGATGCACAACAGGACTTACTGTG	FE672431.1	-	-	-	-	-	-	-	-	-	-	-	-	-	-	-	-
271	CATGTCTAGTGTCTCTAGTACCTATT	FE672430.1	-	-	-	-	-	-	-	-	-	-	-	-	-	-	-	-
273	CATGGTTTCGTTGCCAAGCCTGAGAC	FE672428.1	-	-	-	-	-	-	-	-	-	-	-	-	-	-	-	-
274	CATGGAAGGTTATCCTAGTGATGAGG	FE672426.1	-	-	-	-	-	-	-	-	-	-	-	-	-	-	-	-
275	CATGGGAAGTTGTGCTAACGGAGGAG	FE672424.1	5e-05	Lupinus luteus NADH-ubiquinone oxidoreductase subunit PSST (PSST) gene, PSST-3 allele, complete cds; nuclear gene for mitochondrial product	AF279902	NADH-ubiquinone oxidoreductase subunit PSST	Q9LKH4_LUPLU	EY475404	8e-05	1	0	AF281035	5e-123	Lupinus luteus NADH-ubiquinone oxidoreductase subunit PSST mRNA, partial cds	NADH-ubiquinone oxidoreductase subunit PSST (Fragment)	Q9LKG9_LUPLU	no	Correlated protein name
277	CATGAGTCGATTTGTAACTTCAGACC	FE672420.1	-	-	-	-	-	-	-	-	-	-	-	-	-	-	-	-
278	CATGGATGTTAGGATCTGACAAACTC	FE672419.1	-	-	-	-	-	-	-	-	-	-	-	-	-	-	-	-
279	CATGAAAATAGTGTTTCAACTGGATA	FE672418.1	-	-	-	-	-	-	-	-	-	-	-	-	-	-	-	-
280	CATGATGTGAAATTGGGTGACTCAGC	FE672417.1	-	-	-	-	-	-	-	-	-	-	-	-	-	-	-	-
281	CATGGAAAACATTATAATCTAGTTTC	FE672415.1	-	-	-	-	-	-	-	-	-	-	-	-	-	-	-	-
282	CATGGATTCACACCCTTCTCCACGCA	FE672414.1	-	-	-	-	-	BG452739	2e-05	0	0	AF369887	0	Pisum sativum ribulose-5-phosphate-3-epimerase mRNA, complete cds	Ribulose-5-phosphate-3-epimerase	Q8S4X2_PEA	-	-
283	CATGTCGAAACAAGATTTCAAATCCA	FE672413.1	-	-	-	-	-	-	-	-	-	-	-	-	-	-	-	-
284	CATGGGTACGCCAAGCATATTTATGG	FE672412.1	-	-	-	-	-	-	-	-	-	-	-	-	-	-	-	-
285	CATGAAGGAGTCAAAGGACAAATTGT	FE672411.1	-	-	-	-	-	-	-	-	-	-	-	-	-	-	-	-
286	CATGCCTCTAGCATCTTATCATTTCT	FE672410.1	-	-	-	-	-	-	-	-	-	-	-	-	-	-	-	-
287	CATGCATTCCGTCTACTGAAGCACTA	FE672409.1	-	-	-	-	-	-	-	-	-	-	-	-	-	-	-	-
288	CATGGAAGTCGAAATCCGCTAAGGAG	FE672408.1	8e-07	Robinia pseudoacacia 26S ribosomal RNA gene, partial sequence	EU340885	-	-	EX526615	3e-07	0	0	EF571299	0	Glycyrrhiza uralensis 26S ribosomal RNA, partial sequence	-	-	-	Correlated RNA description
289	CATGCAATGCTGCACTGCTTGAGACT	FE672407.1	-	-	-	-	-	-	-	-	-	-	-	-	-	-	-	-
290	CATGTGTAAGCAAATATAGCTAATAT	FE672406.1	8e-07	C.arietinum mRNA for metallothionein (clone: CanMT-1)	X95708	Metallothionein-like protein 1; ( Short=MT-1)	MT1_CICAR	-	-	-	-	-	-	-	-	-	-	-
291	CATGCTATCCTCCAAAAGCCGCATAA	FE672405.1	-	-	-	-	-	-	-	-	-	-	-	-	-	-	-	-
292	CATGTTTCGCCCTGAAAGAATTAAAG	FE672404.1	8e-07	Cicer arietinum partial mRNA for epoxide hydrolase, clone CanEPH	AJ487037	Epoxide hydrolase (Fragment); ( EC=3	Q8LPE6_CICAR	CA917530	8e-05	1	0	AJ487037	5e-138	Cicer arietinum partial mRNA for epoxide hydrolase, clone CanEPH	Epoxide hydrolase (Fragment); ( EC=3.3.2.3)	Q8LPE6_CICAR	correlated ID	-
293	CATGAAAGGAGAAAGAGATGGGGAGG	FE672403.1	-	-	-	-	-	-	-	-	-	-	-	-	-	-	-	-
294	CATGGCTGCAGCAAGCGTTCGAGTAT	FE672402.1	-	-	-	-	-	-	-	-	-	-	-	-	-	-	-	-
295	CATGAATGGATTAACGAGATTCCCAC	FE672401.1	8e-07	Glycyrrhiza uralensis 26S ribosomal RNA, partial sequence	EF571299	-	-	EX530043	3e-07	0	0	Z11498	0	M.sativa 26S rRNA	-	-	-	Correlated RNA description
296	CATGAGCAGGTTGAAGAGAGCTCTAA	FE672399.1	-	-	-	-	-	-	-	-	-	-	-	-	-	-	-	-
297	CATGTGAAGTATTGCAACTGCAGCAC	FE672398.1	-	-	-	-	-	-	-	-	-	-	-	-	-	-	-	-
298	CATGGCACCCTCTTCACCATCTTCCT	FE672397.1	-	-	-	-	-	-	-	-	-	-	-	-	-	-	-	-
299	CATGTATGAGATAAGAGCAGGTATTC	FE672396.1	-	-	-	-	-	-	-	-	-	-	-	-	-	-	-	-
300	CATGGCCTTTTTGCAAAAGTTTGCTG	FE672395.1	-	-	-	-	-	-	-	-	-	-	-	-	-	-	-	-
301	CATGTATGAATTTTAGTAATGGACTT	FE672393.1	-	-	-	-	-	-	-	-	-	-	-	-	-	-	-	-
302	CATGGGTGAGGAGCAGATTTGTGGCC	FE672391.1	-	-	-	-	-	EV262669	1e-06	0	0	AF416338	3e-77	Medicago sativa eukaryotic translation initiation factor 5A-2 mRNA, complete cds	Eukaryotic translation initiation factor 5A-2; ( Short=eIF-5A-2)	IF5A2_MEDSA	-	-
303	CATGGTGACCGGTTNAACCGGGATTT	FE672390.1	-	-	-	-	-	-	-	-	-	-	-	-	-	-	-	-
304	CATGTTTCAGAAGCTTCACAAATAAT	FE672387.1	8e-07	Cicer arietinum partial mRNA for hypothetical protein	AJ271665	Putative uncharacterized protein (Fragment)	Q9M445_CICAR	-	-	-	-	-	-	-	-	-	-	-
305	CATGAGCACCAATTGTCTTAGTGGCT	FE672386.1	-	-	-	-	-	-	-	-	-	-	-	-	-	-	-	-
306	CATGATGCCCAAAAATCTACCAGCAC	FE672385.1	-	-	-	-	-	EV261970	8e-05	1	0	X76269	5e-94	P.sativum mRNA for thioredoxin M	Thioredoxin M-type, chloroplastic precursor; ( Short=Trx-M)	TRXM_PEA	-	-
308	CATGGGGCGTATCCTCCACCGGCGGC	FE672383.1	-	-	-	-	-	-	-	-	-	-	-	-	-	-	-	-
309	CATGTCAATATCATACCGAGTTGTCC	FE672381.1	-	-	-	-	-	-	-	-	-	-	-	-	-	-	-	-
310	CATGTTCTGATTTATGCTTTGCAGCC	FE672380.1	-	-	-	-	-	-	-	-	-	-	-	-	-	-	-	-
311	CATGAAATCTTCTTCCTTCTCCTTGT	FE672379.1	-	-	-	-	-	-	-	-	-	-	-	-	-	-	-	-
312	CATGATCAAGGTTCTGAAACATATGT	FE672378.1	-	-	-	-	-	-	-	-	-	-	-	-	-	-	-	-
313	CATGGAATTGCAACATTGAAAGGTCT	FE672377.1	-	-	-	-	-	-	-	-	-	-	-	-	-	-	-	-
314	CATGAAGATAATGAGGCGCAGCTTCT	FE672376.1	-	-	-	-	-	-	-	-	-	-	-	-	-	-	-	-
315	CATGGCCCTATCCTCTTGTACTAGAC	FE672375.1	8e-07	Cicer arietinum mRNA for lipid transfer protein	AJ002958	Non-specific lipid-transfer protein precursor; ( Short=LTP)	NLTP_CICAR	-	-	-	-	-	-	-	-	-	-	-
316	CATGAAGATGGGTGTGGAAGTCTATC	FE672374.1	-	-	-	-	-	DW015396	3e-07	0	0	AY496909	0	Glycine max enolase mRNA, complete cds	Enolase; ( EC=4.2.1.11)	Q6RIB7_SOYBN	-	-
317	CATGGCCATCAGTGTGAATTATCAGC	FE672373.1	-	-	-	-	-	-	-	-	-	-	-	-	-	-	-	-
318	CATGTGGATTACTTTATTGCGGTTTA	FE672372.1	-	-	-	-	-	-	-	-	-	-	-	-	-	-	-	-
319	CATGGCGCCCAATCAGTCAGGACACT	FE672370.1	-	-	-	-	-	-	-	-	-	-	-	-	-	-	-	-
320	CATGGTTTTCTTCTGGGGACGAGGCA	FE672367.1	-	-	-	-	-	-	-	-	-	-	-	-	-	-	-	-
322	CATGCCTTGATCTTTCATCTAATCTT	FE672365.1	-	-	-	-	-	-	-	-	-	-	-	-	-	-	-	-
324	CATGACACCTTCTCTCCCCCCACACC	FE672362.1	-	-	-	-	-	-	-	-	-	-	-	-	-	-	-	-
325	CATGAATACAAGCCAGAGTTCGACAT	FE672361.1	3e-06	Cicer arietinum mRNA for glyceraldehyde 3-phosphate dehydrogenase, partial	AJ010224	Glyceraldehyde 3-phosphate dehydrogenase, cytosolic (Fragment); ( EC=1	O81924_CICAR	-	-	-	-	-	-	-	-	-	-	-
326	CATGGCTGTCTCCAGTTCATCTCTTG	FE672360.1	-	-	-	-	-	BF003827	8e-05	1	0	X96723	0	M.sativa mRNA for protein kinase	Protein kinase; ( EC=2.7.1.37)	Q9AR92_MEDSA	-	-
327	CATGAAGGTTATGTGAATTGTGGTTA	FE672359.1	-	-	-	-	-	-	-	-	-	-	-	-	-	-	-	-
328	CATGGTGTGGTTTAGATGGCTATGAT	FE672357.1	-	-	-	-	-	-	-	-	-	-	-	-	-	-	-	-
329	CATGAAACAGATTCAGGAAGCTTTGT	FE672356.1	-	-	-	-	-	-	-	-	-	-	-	-	-	-	-	-
330	CATGTTCCCGCATAACTGTCATAACT	FE672355.1	-	-	-	-	-	-	-	-	-	-	-	-	-	-	-	-
331	CATGTCGCTGATGGATTTGTTGGAGG	FE672354.1	-	-	-	-	-	-	-	-	-	-	-	-	-	-	-	-
332	CATGGGTTTTGAACCTCAAATTAGGA	FE672353.1	8e-07	Pisum sativum P72 DEAD box protein mRNA, complete cds	AF188678	P72 DEAD box protein	Q9SP26_PEA	AW774631	3e-07	0	0	AF188678	0	Pisum sativum P72 DEAD box protein mRNA, complete cds	P72 DEAD box protein	Q9SP26_PEA	correlated ID	-
333	CATGCCCCGGTGGAACTAATTATAGA	FE672352.1	8e-07	Cicer arietinum L. mRNA for thaumatin-like protein PR-5a	AJ010502	Thaumatin-like protein PR-5a precursor	O81927_CICAR	-	-	-	-	-	-	-	-	-	-	-
334	CATGAAGGTGAAGGGTAATGTTTTCA	FE672350.1	-	-	-	-	-	-	-	-	-	-	-	-	-	-	-	-
335	CATGAGATTTAAAAGCAAATTATAGC	FE672349.1	-	-	-	-	-	-	-	-	-	-	-	-	-	-	-	-
336	CATGCTTTTTACTAAGTTTGTTCTGT	FE672348.1	-	-	-	-	-	-	-	-	-	-	-	-	-	-	-	-
337	CATGAATCGCCTGCGGAGAAGAGGGC	FE672346.1	-	-	-	-	-	-	-	-	-	-	-	-	-	-	-	-
338	CATGATTGACCAGGGTGAGAAGGATG	FE672057.1	-	-	-	-	-	AJ388813	1e-06	0	0	AY635929	1e-39	Arachis hypogaea putative inorganic pyrophosphatase mRNA, complete cds	Putative inorganic pyrophosphatase	Q6KBB0_ARAHY	-	-
339	CATGTAATATTGTTCTGTTAGTTAAC	FE672054.1	-	-	-	-	-	-	-	-	-	-	-	-	-	-	-	-
341	CATGTGCACTGAACACAGAATTCCAA	FE672052.1	-	-	-	-	-	-	-	-	-	-	-	-	-	-	-	-
342	CATGTCAGCATTGATGTTGTATCTAC	FE672051.1	-	-	-	-	-	-	-	-	-	-	-	-	-	-	-	-
344	CATGATGCACAACAGGACATACTGTG	FE672047.1	3e-06	Medicago sativa clone C3 ribosomal protein L32 mRNA, complete cds	DQ122831	Ribosomal protein L32	Q45NI6_MEDSA	EV255458	1e-06	0	0	DQ122831	0	Medicago sativa clone C3 ribosomal protein L32 mRNA, complete cds	Ribosomal protein L32	Q45NI6_MEDSA	correlated ID	-
345	CATGGTTGTCTCAGTTACCGCATCAA	FE672046.1	-	-	-	-	-	-	-	-	-	-	-	-	-	-	-	-
346	CATGGTCTCTGCTACGTTGTCGGTGA	FE671289.1	-	-	-	-	-	-	-	-	-	-	-	-	-	-	-	-
347	CATGTCTTGGTTATCTTCAAGGTGGT	FE671287.1	8e-07	Cicer arietinum mRNA for lipid transfer protein	AJ002958	Non-specific lipid-transfer protein precursor; ( Short=LTP)	NLTP_CICAR	-	-	-	-	-	-	-	-	-	-	-
348	CATGGTCCTATTCATTTCCGTGCTCC	FE671285.1	8e-07	Lupinus luteus clone L13A3I ribosomal protein L13A gene, partial cds	EF584661	Ribosomal protein L13A (Fragment)	A5JVN9_LUPLU	-	-	-	-	-	-	-	-	-	-	-
349	CATGGGTCGCTCTAATGTCGGGAATT	FE671284.1	-	-	-	-	-	-	-	-	-	-	-	-	-	-	-	-
350	CATGCTCAAAACGCTTGTGGTGTATC	FE671283.1	-	-	-	-	-	-	-	-	-	-	-	-	-	-	-	-
351	CATGCAATGATGCTGGAAACAATTGC	FE671282.1	-	-	-	-	-	AW686901	3e-07	0	0	U87907	3e-77	Glycine max alternative oxidase 2b (Aox2b) mRNA, complete cds; nuclear gene for mitochondrial product	Alternative oxidase 3, mitochondrial precursor; ( EC=1.-.-.-)	AOX3_SOYBN	-	-
352	CATGCTGAAAACAATATCTTCAGCTA	FE671281.1	-	-	-	-	-	CX519742	8e-05	0	0	AF020269	0	Medicago sativa chloroplast malate dehydrogenase precursor (p1mdh) mRNA, nuclear gene encoding chloroplast protein, complete cds	Malate dehydrogenase [NADP], chloroplastic precursor; ( EC=1.1.1.82; AltName	MDHP_MEDSA	-	-
353	CATGGAGCACCCTCACAATGCAGTTC	FE672045.1	-	-	-	-	-	-	-	-	-	-	-	-	-	-	-	-
354	CATGGACATCAGTGAAGATGAAGATG	FE672044.1	-	-	-	-	-	-	-	-	-	-	-	-	-	-	-	-
355	CATGGGGCTTGTTTCGCCGAACAACA	FE672043.1	-	-	-	-	-	-	-	-	-	-	-	-	-	-	-	-
356	CATGTTTTTCACCAACAGGATGTGGA	FE672042.1	-	-	-	-	-	-	-	-	-	-	-	-	-	-	-	-
357	CATGATGATTTTCTCATTTCTGCTAT	FE672041.1	-	-	-	-	-	-	-	-	-	-	-	-	-	-	-	-
358	CATGAATCTACAAAGAACTCTACGCG	FE672040.1	-	-	-	-	-	-	-	-	-	-	-	-	-	-	-	-
359	CATGCATCATCTTTCCCAACAACCGT	FE672039.1	-	-	-	-	-	-	-	-	-	-	-	-	-	-	-	-
360	CATGATTCTCCGTCCGCGGCGACATA	FE672038.1	-	-	-	-	-	-	-	-	-	-	-	-	-	-	-	-
362	CATGAATAGAGTTGATGAATATATTG	FE672035.1	-	-	-	-	-	-	-	-	-	-	-	-	-	-	-	-
363	CATGGCTGGCATTTGTTGTTTTCATC	FE672034.1	-	-	-	-	-	-	-	-	-	-	-	-	-	-	-	-
364	CATGGAAGGGCTAAACAAGCAGCAGC	FE671276.1	-	-	-	-	-	-	-	-	-	-	-	-	-	-	-	-
365	CATGCTTGCGGCAGCTCACGCATTAT	FE671275.1	-	-	-	-	-	-	-	-	-	-	-	-	-	-	-	-
366	CATGCTCGTTTTGTTGATTTTTTTTT	FE671274.1	-	-	-	-	-	-	-	-	-	-	-	-	-	-	-	-
367	CATGATAAACTAAACAATCTTCAATT	FE671273.1	-	-	-	-	-	-	-	-	-	-	-	-	-	-	-	-
368	CATGTAGTCTTGGTCTTCAACAGAAA	FE671272.1	-	-	-	-	-	-	-	-	-	-	-	-	-	-	-	-
370	CATGGCCCTATCCTCTTGTACTAAAC	FE671270.1	5e-05	Cicer arietinum mRNA for lipid transfer protein	AJ002958	Non-specific lipid-transfer protein precursor; ( Short=LTP)	NLTP_CICAR	-	-	-	-	-	-	-	-	-	-	-
371	CATGGAATATGAAATTTACAAGGCGA	FE671268.1	-	-	-	-	-	-	-	-	-	-	-	-	-	-	-	-
372	CATGTTCACTTGCCATCTTCATCCCA	FE671267.1	-	-	-	-	-	-	-	-	-	-	-	-	-	-	-	-
373	CATGTGTATCTCACACTTGTCCATTG	FE672033.1	-	-	-	-	-	-	-	-	-	-	-	-	-	-	-	-
374	CATGACAATGCTTACAGTGCTTATCC	FE672032.1	-	-	-	-	-	-	-	-	-	-	-	-	-	-	-	-
375	CATGATATCAAATTGCCTCCAACAAG	FE672031.1	-	-	-	-	-	-	-	-	-	-	-	-	-	-	-	-
376	CATGATGAATAGACTTAGCCATTCCA	FE672029.1	-	-	-	-	-	-	-	-	-	-	-	-	-	-	-	-
377	CATGCGTCTCGTTCTTAAGAGCCGGC	FE672027.1	-	-	-	-	-	-	-	-	-	-	-	-	-	-	-	-
378	CATGTCTAGCTTTCAATCAACCACAA	FE672026.1	-	-	-	-	-	-	-	-	-	-	-	-	-	-	-	-
379	CATGCAAAACTTAGCAAGGGCTATTC	FE672025.1	-	-	-	-	-	-	-	-	-	-	-	-	-	-	-	-
381	CATGGTGGTGCTGGTCACTTGATGGC	FE672023.1	-	-	-	-	-	-	-	-	-	-	-	-	-	-	-	-
382	CATGTTTGAGCAAGACACGGTTTTAA	FE672022.1	-	-	-	-	-	-	-	-	-	-	-	-	-	-	-	-
384	CATGTTTCATTGCTTCTTCATAATCA	FE671263.1	-	-	-	-	-	-	-	-	-	-	-	-	-	-	-	-
385	CATGAAGGATGAAGGTGTTATTGCTC	FE671261.1	-	-	-	-	-	-	-	-	-	-	-	-	-	-	-	-
386	CATGTACAGAACTTACAAATAAAGCT	FE671259.1	-	-	-	-	-	-	-	-	-	-	-	-	-	-	-	-
387	CATGGAGGATGAACGTGATGCCGAGT	FE671258.1	-	-	-	-	-	-	-	-	-	-	-	-	-	-	-	-
388	CATGGTATGTACAGGAAGTGGAAGTG	FE671257.1	-	-	-	-	-	-	-	-	-	-	-	-	-	-	-	-
389	CATGCGCGTTTGCCGTGAATTCGCCG	FE671255.1	-	-	-	-	-	-	-	-	-	-	-	-	-	-	-	-
390	CATGCCCTGATGCTTATCATCAACCT	FE671254.1	8e-07	Cicer arietinum L. mRNA for thaumatin-like protein PR-5a	AJ010502	Thaumatin-like protein PR-5a precursor	O81927_CICAR	EX532875	2e-05	0	0	AJ010502	3e-65	Cicer arietinum L. mRNA for thaumatin-like protein PR-5a	Thaumatin-like protein PR-5a precursor	O81927_CICAR	correlated ID	-
391	CATGGTTGGCTGTGGCACTCTTTCTC	FE672021.1	-	-	-	-	-	-	-	-	-	-	-	-	-	-	-	-
392	CATGGAAATCACCCATTCACTTGTTT	FE672018.1	-	-	-	-	-	-	-	-	-	-	-	-	-	-	-	-
393	CATGGCTCTTCAATAAAACCAGGTCA	FE672017.1	-	-	-	-	-	-	-	-	-	-	-	-	-	-	-	-
394	CATGTTCAAAAGCAGATGAGGAACCA	FE672016.1	-	-	-	-	-	-	-	-	-	-	-	-	-	-	-	-
395	CATGGTTTAAAGCAAAGATTTTTCTC	FE672015.1	-	-	-	-	-	-	-	-	-	-	-	-	-	-	-	-
396	CATGGGTAAGAGGCTGGGACGATAAC	FE672014.1	-	-	-	-	-	-	-	-	-	-	-	-	-	-	-	-
397	CATGAAAACTGCCATTTCTTCCATCA	FE672012.1	-	-	-	-	-	-	-	-	-	-	-	-	-	-	-	-
398	CATGGGCATNCCCTCATCGTTAATAG	FE672011.1	-	-	-	-	-	-	-	-	-	-	-	-	-	-	-	-
400	CATGTTCCGTTNACTTCAAGCTTTTC	FE671250.1	-	-	-	-	-	-	-	-	-	-	-	-	-	-	-	-
401	CATGTCTTTGCTTTTAGATCTCATCA	FE671249.1	-	-	-	-	-	CX528495	8e-05	1	0	Y10267	0	M.truncatula mRNA for glutamine synthetase, 1425bp	Glutamine synthetase; ( EC=6.3.1.2)	O04998_MEDTR	-	-
402	CATGCTGAATAAATGTTGTGGTGTTC	FE671248.1	-	-	-	-	-	-	-	-	-	-	-	-	-	-	-	-
403	CATGCTGGATGTGTTGCGAAGATCAA	FE671247.1	-	-	-	-	-	AJ498404	8e-05	1	0	X14826	0	Trifolium repens Adh1 mRNA for alcohol dehydrogenase 1	Alcohol dehydrogenase 1; ( EC=1.1.1.1)	ADH1_TRIRP	-	-
404	CATGTCCAAATAAGAAGGGGCTGGTG	FE671245.1	-	-	-	-	-	-	-	-	-	-	-	-	-	-	-	-
405	CATGCCGATGAGTACTCAAAACTAGT	FE671243.1	-	-	-	-	-	-	-	-	-	-	-	-	-	-	-	-
406	CATGTTTGTATGTTATATATATTCAC	FE671242.1	-	-	-	-	-	-	-	-	-	-	-	-	-	-	-	-
407	CATGGGATTTGTTGAAGGCTACAGGG	FE672008.1	1e-05	Pisum sativum light-harvesting chlorophyll-a/b binding protein Lhcb2 mRNA, complete cds	AY845254	Chlorophyll a-b binding protein 215, chloroplastic precursor; (AltName: Full=LHCII type II CAB-215; Short=LHCP)	CB215_PEA	CX540661	5e-06	0	0	Z29965	0	T.repens (Huia) mRNA for light-harvesting chlorophyll a/b binding protein	Light-harvesting chlorophyll a/b binding protein (Fragment)	Q41617_TRIRP	no	Correlated protein name
408	CATGGAACTTCAAAGCAAGATCTTGT	FE672007.1	-	-	-	-	-	-	-	-	-	-	-	-	-	-	-	-
410	CATGCATCCATCTGAGTTTCTTGAGC	FE672004.1	-	-	-	-	-	AJ498054	8e-05	1	0	AB236771	5e-45	Trifolium pratense RNA for hypothetical protein, complete cds, clone: C1579	Putative uncharacterized protein	Q2PEX9_TRIPR	-	-
411	CATGATTTACAGGGTTCGAATTCGAG	FE672003.1	-	-	-	-	-	-	-	-	-	-	-	-	-	-	-	-
412	CATGGAGATGAAATATGCCAAGTGAA	FE672002.1	-	-	-	-	-	-	-	-	-	-	-	-	-	-	-	-
414	CATGGTCTAATTCTATGGAATCAGAC	FE672000.1	-	-	-	-	-	EY474709	2e-05	0	0	AF532620	6e-110	Glycine max hypothetical protein mRNA, complete cds	Putative uncharacterized protein	Q8LJS0_SOYBN	-	-
415	CATGCTGGTGGTAAATGCCCTGAAGA	FE671998.1	-	-	-	-	-	-	-	-	-	-	-	-	-	-	-	-
417	CATGACTGAAGCTTTGGAGCAGACTT	FE671240.1	1e-05	Glycine max Cu/Zn-superoxide dismutase copper chaperone precursor (CCS) mRNA, complete cds; nuclear gene for chloroplast product	AF329816	Cu/Zn-superoxide dismutase copper chaperone precursor	Q9BBU5_SOYBN	BQ138432	1e-06	0	0	AF329816	2e-118	Glycine max Cu/Zn-superoxide dismutase copper chaperone precursor (CCS) mRNA, complete cds; nuclear gene for chloroplast product	Cu/Zn-superoxide dismutase copper chaperone precursor	Q9BBU5_SOYBN	correlated ID	-
418	CATGCAACGCCCCAGCTAAAATCTCA	FE671238.1	-	-	-	-	-	-	-	-	-	-	-	-	-	-	-	-
419	CATGGTTTAAGGGAAGCTTTCCATCA	FE671237.1	-	-	-	-	-	-	-	-	-	-	-	-	-	-	-	-
420	CATGCAAAAAACTGGCAATTGTGTAC	FE671236.1	-	-	-	-	-	-	-	-	-	-	-	-	-	-	-	-
422	CATGCAGAAGCAATCAATTACAGTTA	FE671233.1	-	-	-	-	-	-	-	-	-	-	-	-	-	-	-	-
424	CATGAGAATCGGTCGCCTTCGGCGTT	FE671231.1	-	-	-	-	-	AW774270	8e-05	1	0	AY935814	0	Glycine max isolate 24 26S ribosomal RNA gene, partial sequence	-	-	-	-
425	CATGCCTTCTAGGGGAAACAGAGTAG	FE671230.1	-	-	-	-	-	-	-	-	-	-	-	-	-	-	-	-
426	CATGAGTGTTAGTATGTATCAAGGAG	FE671997.1	-	-	-	-	-	-	-	-	-	-	-	-	-	-	-	-
427	CATGTGTGTGTTGCTTAATGGGCCAA	FE671996.1	8e-07	Cicer arietinum mRNA for putative transmembrane channel protein, partial	AJ005869	Transmembrane channel protein (Fragment)	O65741_CICAR	-	-	-	-	-	-	-	-	-	-	-
428	CATGATTTAAATAGGAACAGGTTCTC	FE671995.1	-	-	-	-	-	-	-	-	-	-	-	-	-	-	-	-
429	CATGGCTGCAGTCATTGTCTTATCTT	FE671994.1	-	-	-	-	-	-	-	-	-	-	-	-	-	-	-	-
430	CATGGCCAGAGAGGACTCAGAAAATT	FE671993.1	-	-	-	-	-	-	-	-	-	-	-	-	-	-	-	-
431	CATGTCTCTAATGGCATATGTACTTA	FE671992.1	-	-	-	-	-	-	-	-	-	-	-	-	-	-	-	-
432	CATGCACAATTATCTCAGCAGGAACA	FE671991.1	-	-	-	-	-	-	-	-	-	-	-	-	-	-	-	-
433	CATGGGCTGATTTGGGGTTTTAGAGC	FE671990.1	8e-07	Cicer arietinum mRNA for ubiquitin conjugating enzyme	AJ005348	Ubiquitin conjugating enzyme (Fragment)	O65733_CICAR	-	-	-	-	-	-	-	-	-	-	-
434	CATGATTCAAAAACCCATCCTGATTT	FE671987.1	-	-	-	-	-	-	-	-	-	-	-	-	-	-	-	-
435	CATGCTCTCGGTAACATAACTTCTGA	FE671228.1	-	-	-	-	-	-	-	-	-	-	-	-	-	-	-	-
436	CATGAATCAGCAAGTTCAATAAGTTG	FE671227.1	-	-	-	-	-	-	-	-	-	-	-	-	-	-	-	-
437	CATGATGAGGATGAAGAGGAGGAGGA	FE671226.1	-	-	-	-	-	-	-	-	-	-	-	-	-	-	-	-
438	CATGATGAGGTCCAGCGCGTTATGGA	FE671225.1	-	-	-	-	-	-	-	-	-	-	-	-	-	-	-	-
439	CATGTATAAACTGCACATAATTTAGA	FE671224.1	-	-	-	-	-	-	-	-	-	-	-	-	-	-	-	-
440	CATGCAACAACACCGCAGACGGACGA	FE671223.1	-	-	-	-	-	-	-	-	-	-	-	-	-	-	-	-
441	CATGCAATAAGTTCATTTGTGTCATT	FE671222.1	-	-	-	-	-	-	-	-	-	-	-	-	-	-	-	-
442	CATGTACCTGTCTTCCATTTTCTCCA	FE671221.1	-	-	-	-	-	-	-	-	-	-	-	-	-	-	-	-
443	CATGCTGATAAGGGTGATGCGCTTTA	FE671220.1	-	-	-	-	-	-	-	-	-	-	-	-	-	-	-	-
445	CATGGGCTGGGCCATATTCCAACTTA	FE671218.1	8e-07	Cicer arietinum partial mRNA for aquoporin-like water channel protein (mip1 gene)	AJ515031	Aquoporin-like water channel protein (Fragment)	Q8GTE0_CICAR	-	-	-	-	-	-	-	-	-	-	-
446	CATGGAAATTACTTGATCAGCAAGGG	FE671982.1	1e-05	Medicago truncatula adenosylhomocysteinase (AHC2) gene, complete cds	AY224189	Adenosylhomocysteinase; ( EC=3	Q84RD8_MEDTR	CA921479	5e-06	0	0	AY224189	0	Medicago truncatula adenosylhomocysteinase (AHC2) gene, complete cds	Adenosylhomocysteinase; ( EC=3.3.1.1)	Q84RD8_MEDTR	correlated ID	-
447	CATGAGCCTCTTTGGTATTGGAATCA	FE671981.1	-	-	-	-	-	-	-	-	-	-	-	-	-	-	-	-
448	CATGGTTTCGAGAGCGCGACGATTTC	FE671980.1	-	-	-	-	-	-	-	-	-	-	-	-	-	-	-	-
449	CATGCTGGCGATTTAGGAAATATCAA	FE671979.1	8e-07	Cicer arietinum mRNA for superoxide dismutase	AJ012739	Superoxide dismutase [Cu-Zn]; ( EC=1	Q9ZNQ4_CICAR	-	-	-	-	-	-	-	-	-	-	-
450	CATGACTTGTTGTACATCCCGGCAGC	FE671977.1	-	-	-	-	-	-	-	-	-	-	-	-	-	-	-	-
451	CATGTAGGGATGAGGTTGTTGATCAC	FE671975.1	-	-	-	-	-	-	-	-	-	-	-	-	-	-	-	-
452	CATGAATATCGCCTCACTAATCATTC	FE671217.1	-	-	-	-	-	-	-	-	-	-	-	-	-	-	-	-
453	CATGCTCATCCCACCAGCTTGTATCA	FE671215.1	-	-	-	-	-	-	-	-	-	-	-	-	-	-	-	-
454	CATGTTTCCTGCATTCCAGTTTGGCA	FE671213.1	-	-	-	-	-	CB893427	3e-07	0	0	X99348	1e-114	V.radiata mRNA for pectinacetylesterase	Pectinacetylesterase precursor	Q41695_PHAAU	-	-
455	CATGACTAAGGTAACTCAAAGCTGAC	FE671212.1	-	-	-	-	-	-	-	-	-	-	-	-	-	-	-	-
456	CATGATCATACACAAACTCGGGAATC	FE671211.1	-	-	-	-	-	-	-	-	-	-	-	-	-	-	-	-
457	CATGAAGGATGTGCCTGGTTGGAAAG	FE671207.1	-	-	-	-	-	-	-	-	-	-	-	-	-	-	-	-
458	CATGATTCAGTTCTTTCACGAGTGAA	FE671973.1	-	-	-	-	-	BQ150607	8e-05	1	0	AB236821	3e-31	Trifolium pratense RNA for putative tetrahydrofolate synthase, complete cds, clone: C2147	Putative tetrahydrofolate synthase	Q2PES9_TRIPR	-	-
459	CATGGGCTGATTCTCTTGGATCCAAA	FE671970.1	5e-05	Glycine max mRNA for peroxisomal fatty acid beta-oxidation multifunctional protein, complete cds	AB333787	Peroxisomal fatty acid beta-oxidation multifunctional protein	B0M199_SOYBN	-	-	-	-	-	-	-	-	-	-	-
460	CATGAGAATCAGCGACGTTTCATCAA	FE671969.1	-	-	-	-	-	-	-	-	-	-	-	-	-	-	-	-
461	CATGACGGTTTTTGCCGAACATAACT	FE671968.1	-	-	-	-	-	-	-	-	-	-	-	-	-	-	-	-
462	CATGGGCCACCCCATTCCCCGTTCAC	FE671967.1	-	-	-	-	-	-	-	-	-	-	-	-	-	-	-	-
463	CATGTTTTCAGCAGTAAAATCTTGCT	FE671963.1	-	-	-	-	-	-	-	-	-	-	-	-	-	-	-	-
464	CATGAAGAAGCTGGATTCTTGGAGGA	FE671205.1	-	-	-	-	-	-	-	-	-	-	-	-	-	-	-	-
467	CATGATTTTGTGAATGGACGATGAAT	FE671201.1	-	-	-	-	-	-	-	-	-	-	-	-	-	-	-	-
469	CATGCTATCGTTCTCCTCAGTTTATT	FE671199.1	-	-	-	-	-	-	-	-	-	-	-	-	-	-	-	-
470	CATGGTGTGGATGTAAGCAAAGAGAT	FE671197.1	-	-	-	-	-	-	-	-	-	-	-	-	-	-	-	-
471	CATGAACGTGAACGCAAGGGGATCGT	FE671196.1	-	-	-	-	-	-	-	-	-	-	-	-	-	-	-	-
472	CATGACTGTATTTTCTAACTTCTCAT	FE671195.1	-	-	-	-	-	-	-	-	-	-	-	-	-	-	-	-
473	CATGACAGCAGCAGCAGTGATAGTGA	FE671194.1	-	-	-	-	-	-	-	-	-	-	-	-	-	-	-	-
474	CATGAAATCTTCAGTTTTTCCACCAG	FE671577.1	-	-	-	-	-	-	-	-	-	-	-	-	-	-	-	-
475	CATGCAGGATTTATTGACAAAGGAGA	FE671576.1	-	-	-	-	-	-	-	-	-	-	-	-	-	-	-	-
477	CATGGGATTTTGTGAATTTGACTGTT	FE671574.1	-	-	-	-	-	-	-	-	-	-	-	-	-	-	-	-
478	CATGGAAAAAGTAACTGCCGCTGTCG	FE671572.1	8e-07	Cicer arietinum cultivar Vijay 14-3-3-like protein (1433) mRNA, 1433-2 allele, complete cds	EF643373	14-3-3-like protein	A5YM78_CICAR	-	-	-	-	-	-	-	-	-	-	-
479	CATGTTTTGAAGATTTAAAGAAGATA	FE671571.1	-	-	-	-	-	-	-	-	-	-	-	-	-	-	-	-
480	CATGCCGGAAGATGAAGAAGAAGTCG	FE671570.1	-	-	-	-	-	-	-	-	-	-	-	-	-	-	-	-
482	CATGCATATGATATGATATATAATAA	FE671567.1	-	-	-	-	-	-	-	-	-	-	-	-	-	-	-	-
484	CATGTTTGGCATTTAAAATTAGCAAA	FE671565.1	-	-	-	-	-	-	-	-	-	-	-	-	-	-	-	-
485	CATGATTGAACCTACTGAAAGTGAAA	FE671564.1	-	-	-	-	-	CX523000	8e-05	1	0	X59773	0	Pisum sativum mRNA for P protein, a part of glycine cleavage complex	Glycine dehydrogenase [decarboxylating], mitochondrial precursor; ( EC=1.4.4.2; AltName	GCSP_PEA	-	-
486	CATGTTCTCAGCGTAGTCCTCTTCGG	FE671562.1	-	-	-	-	-	-	-	-	-	-	-	-	-	-	-	-
487	CATGTCCTATCCTTGACTTACCAAAA	FE671561.1	-	-	-	-	-	-	-	-	-	-	-	-	-	-	-	-
489	CATGAAAGTTAGAGATGGTAAAGGAT	FE671558.1	-	-	-	-	-	-	-	-	-	-	-	-	-	-	-	-
491	CATGCTCTCCACCAGCTCCATAGCCT	FE671556.1	-	-	-	-	-	-	-	-	-	-	-	-	-	-	-	-
492	CATGTCTACAAAAAGCTGTCTCCGAG	FE671555.1	-	-	-	-	-	-	-	-	-	-	-	-	-	-	-	-
493	CATGGCGGTTCTATACCCTCTGATCT	FE671553.1	-	-	-	-	-	-	-	-	-	-	-	-	-	-	-	-
494	CATGGGTCTCTACGACCTCCTCAAAC	FE671552.1	-	-	-	-	-	-	-	-	-	-	-	-	-	-	-	-
496	CATGATGCTGAAACAGGAGCAGGCCA	FE671550.1	-	-	-	-	-	-	-	-	-	-	-	-	-	-	-	-
498	CATGGAAGCCAAAGAAAATTAAGAAC	FE671547.1	-	-	-	-	-	CX539172	8e-05	1	0	AB196794	0	Glycine max Gm crt-1 mRNA for calreticulin-1, complete cds	Calreticulin-1	A0A762_SOYBN	-	-
500	CATGAGGCCCGGCGTAGCGATAAAAC	FE671543.1	-	-	-	-	-	-	-	-	-	-	-	-	-	-	-	-
501	CATGAGAGGTGTCTACTTCAAAAATA	FE671541.1	-	-	-	-	-	-	-	-	-	-	-	-	-	-	-	-
503	CATGTGTATTGTAGGTCCCATAATCA	FE671539.1	-	-	-	-	-	-	-	-	-	-	-	-	-	-	-	-
505	CATGTTCTGATGTTAATTCGTCAGAG	FE671537.1	-	-	-	-	-	-	-	-	-	-	-	-	-	-	-	-
506	CATGACCCGGGGTCATTTTACCACTT	FE671536.1	-	-	-	-	-	BM779616	8e-05	1	0	AB333786	0	Glycine max mRNA for peroxisomal acyl-CoA oxidase, complete cds	Peroxisomal acyl-CoA oxidase	B0M198_SOYBN	-	-
507	CATGAAATAAAACTATAGTAGTTAAT	FE671535.1	-	-	-	-	-	-	-	-	-	-	-	-	-	-	-	-
510	CATGATCATTTCAGAGAAAAACCGTA	FE671532.1	-	-	-	-	-	-	-	-	-	-	-	-	-	-	-	-
511	CATGGAAACAGATCAAACGACGAATT	FE671531.1	-	-	-	-	-	-	-	-	-	-	-	-	-	-	-	-
512	CATGCTCATTGCTAAACCTTCCTTCC	FE671530.1	-	-	-	-	-	-	-	-	-	-	-	-	-	-	-	-
514	CATGGATTGCAGGTGGAAATTGGAGA	FE671528.1	-	-	-	-	-	-	-	-	-	-	-	-	-	-	-	-
515	CATGTCATCATAATTAGTGTAATCGA	FE671527.1	-	-	-	-	-	-	-	-	-	-	-	-	-	-	-	-
516	CATGCCGAGTATCAAACAAATAATAA	FE671524.1	-	-	-	-	-	-	-	-	-	-	-	-	-	-	-	-
517	CATGGCATCACATACTGAGCTAGCTG	FE671522.1	-	-	-	-	-	-	-	-	-	-	-	-	-	-	-	-
518	CATGATTGCCACTTAAAAATTTTTCA	FE671519.1	-	-	-	-	-	-	-	-	-	-	-	-	-	-	-	-
519	CATGGTGCGGCTGTAACTGTTTCTGA	FE671516.1	-	-	-	-	-	-	-	-	-	-	-	-	-	-	-	-
520	CATGCTAAAGATGAGTTAGAGCGCCA	FE671514.1	-	-	-	-	-	-	-	-	-	-	-	-	-	-	-	-
521	CATGCATTCAGTGACTATCAATGGCT	FE671513.1	8e-07	Caragana korshinskii var. intermedia oleate desaturase (FAD2-2) mRNA, complete cds	EF503621	Oleate desaturase	A4ZYU3_9FABA	DY616918	3e-07	0	0	EF503621	0	Caragana korshinskii var. intermedia oleate desaturase (FAD2-2) mRNA, complete cds	Oleate desaturase	A4ZYU3_9FABA	correlated ID	-
522	CATGTTACTTTGTTGGCTCATTCCCT	FE671512.1	-	-	-	-	-	-	-	-	-	-	-	-	-	-	-	-
523	CATGTCATCTCCCTTCTCCCTTCAAC	FE671511.1	-	-	-	-	-	-	-	-	-	-	-	-	-	-	-	-
524	CATGCCCAGGGTGTGGGATTTTCAAC	FE671509.1	-	-	-	-	-	-	-	-	-	-	-	-	-	-	-	-
525	CATGTGGAATGGAAATGGTGGTTACA	FE671507.1	-	-	-	-	-	-	-	-	-	-	-	-	-	-	-	-
526	CATGCCCTTGGTTAAGACCTGATGGT	FE671506.1	-	-	-	-	-	CX530420	8e-05	1	0	AY560003	0	Medicago sativa S-adenosylmethionine synthase mRNA, complete cds	S-adenosylmethionine synthetase (Fragment); ( EC=2.5.1.6)	Q6J9X6_MEDSA	-	-
527	CATGGCATATACTCAAGGGAAAGGCT	FE671504.1	-	-	-	-	-	-	-	-	-	-	-	-	-	-	-	-
528	CATGTGAATCGTACTGACTACCAGCT	FE671502.1	-	-	-	-	-	-	-	-	-	-	-	-	-	-	-	-
529	CATGAAAGGCCTATTGTGTTGTGGCA	FE671501.1	-	-	-	-	-	-	-	-	-	-	-	-	-	-	-	-
530	CATGAAATATATCGCACTTTGTATTA	FE671500.1	-	-	-	-	-	-	-	-	-	-	-	-	-	-	-	-
531	CATGCAAGTGTGGCCACCAATTGGCA	FE671499.1	8e-07	Cicer arietinum mRNA for ribulose 1,5-bisphosphate carboxylase small subunit	AJ131050	Ribulose 1,5-bisphosphate carboxylase small subunit precursor; ( EC=4	Q9ZP07_CICAR	-	-	-	-	-	-	-	-	-	-	-
532	CATGACTTTTGGAAATGATGCTTTAT	FE671498.1	-	-	-	-	-	CX542412	3e-07	0	0	AF272360	2e-06	Glycine max unknown mRNA	Putative uncharacterized protein	Q9FYX7_SOYBN	-	-
533	CATGTATTGCAGCTTGACCTGTGGGG	FE671497.1	-	-	-	-	-	-	-	-	-	-	-	-	-	-	-	-
534	CATGCAAAAGGTACGCCGTTAGAGTG	FE671496.1	-	-	-	-	-	-	-	-	-	-	-	-	-	-	-	-
535	CATGATTAGAGTGCTATCCTTATATG	FE671495.1	8e-07	Cicer arietinum cultivar Vijay 14-3-3-like protein (1433) mRNA, 1433-2 allele, complete cds	EF643373	14-3-3-like protein	A5YM78_CICAR	-	-	-	-	-	-	-	-	-	-	-
536	CATGTTGTTGTAACTTGTTAGTACAT	FE671494.1	-	-	-	-	-	-	-	-	-	-	-	-	-	-	-	-
538	CATGGTGAGACTCACTGCTGACCTTA	FE671491.1	-	-	-	-	-	-	-	-	-	-	-	-	-	-	-	-
539	CATGTAGTGCATCAGGTTGAATGTCT	FE671490.1	-	-	-	-	-	-	-	-	-	-	-	-	-	-	-	-
540	CATGTGATTCAAACCTTAACTCAAAG	FE671489.1	-	-	-	-	-	-	-	-	-	-	-	-	-	-	-	-
541	CATGCTGGACAAGTACAAGAACTATG	FE671488.1	-	-	-	-	-	-	-	-	-	-	-	-	-	-	-	-
542	CATGGATCTTAAGAATTTCCATCCTT	FE671487.1	-	-	-	-	-	-	-	-	-	-	-	-	-	-	-	-
543	CATGGCTTGCATATAAAGAAAATAGA	FE671486.1	-	-	-	-	-	-	-	-	-	-	-	-	-	-	-	-
544	CATGGAAGACTGAAGAACATTAAGGT	FE671485.1	-	-	-	-	-	-	-	-	-	-	-	-	-	-	-	-
545	CATGTAACTTATCAAACGAGCCTTTA	FE673305.1	-	-	-	-	-	-	-	-	-	-	-	-	-	-	-	-
547	CATGCAGTAATTTCGAAATAGCAGTA	FE673301.1	-	-	-	-	-	-	-	-	-	-	-	-	-	-	-	-
550	CATGTGACCAGGAGGAAACAATAGAC	FE673297.1	-	-	-	-	-	-	-	-	-	-	-	-	-	-	-	-
551	CATGTATAAAATAACCCTCCATCACT	FE673295.1	-	-	-	-	-	-	-	-	-	-	-	-	-	-	-	-
552	CATGTCGTCTTGGTTGAGATCTGCGG	FE673294.1	-	-	-	-	-	-	-	-	-	-	-	-	-	-	-	-
554	CATGAACCTGCTAGGAGGCCTAGCTT	FE673292.1	-	-	-	-	-	-	-	-	-	-	-	-	-	-	-	-
555	CATGTTATGACGAATCTCGGTGAGAA	FE673289.1	8e-07	Cicer arietinum mRNA for CaM protein	Y09853	CaM protein	Q7DLT8_CICAR	-	-	-	-	-	-	-	-	-	-	-
556	CATGTCCGTTCTTGTTACTGGTTCAG	FE673287.1	-	-	-	-	-	-	-	-	-	-	-	-	-	-	-	-
557	CATGAGTCCCATCATAGAGCAAGAGA	FE673286.1	-	-	-	-	-	AL389507	3e-07	0	0	AY575953	2e-84	Glycine max beta-carotene hydroxylase mRNA, complete cds	Beta-carotene hydroxylase	Q6PV95_SOYBN	-	-
558	CATGATCTTATATAAGTTAATAAACC	FE673285.1	-	-	-	-	-	-	-	-	-	-	-	-	-	-	-	-
559	CATGCAACCAAAATCTCAATATTGGT	FE673284.1	-	-	-	-	-	-	-	-	-	-	-	-	-	-	-	-
561	CATGTCAATGATGGAATGAATGATGT	FE673281.1	-	-	-	-	-	-	-	-	-	-	-	-	-	-	-	-
562	CATGCTTCTTCGCCATTTCCATAAGC	FE673280.1	-	-	-	-	-	-	-	-	-	-	-	-	-	-	-	-
563	CATGGGAAAGTTTTTCGCTGAGAGAC	FE673279.1	-	-	-	-	-	-	-	-	-	-	-	-	-	-	-	-
564	CATGCTTGTACTGGAAAGAAGGAAAA	FE673277.1	-	-	-	-	-	-	-	-	-	-	-	-	-	-	-	-
565	CATGCTTATCCCAAATAGTCACATTA	FE673276.1	-	-	-	-	-	-	-	-	-	-	-	-	-	-	-	-
566	CATGTGTTGTTATGTGATCCCACACC	FE673275.1	-	-	-	-	-	-	-	-	-	-	-	-	-	-	-	-
567	CATGATAGAGATTCAACGGACGAGGA	FE673272.1	-	-	-	-	-	-	-	-	-	-	-	-	-	-	-	-
568	CATGGCTGCTGGACTTCATCATCGTT	FE673271.1	-	-	-	-	-	-	-	-	-	-	-	-	-	-	-	-
572	CATGGATGGGCGCATTTTGGGCTCAG	FE673267.1	-	-	-	-	-	-	-	-	-	-	-	-	-	-	-	-
574	CATGGTCACGTGGACCACAAAGGTCA	FE673265.1	-	-	-	-	-	-	-	-	-	-	-	-	-	-	-	-
576	CATGAACAATTTGGACGAGAGATTCG	FE673263.1	-	-	-	-	-	-	-	-	-	-	-	-	-	-	-	-
577	CATGAACATAATTACCACCACCATTG	FE673261.1	-	-	-	-	-	-	-	-	-	-	-	-	-	-	-	-
578	CATGTTATGCCTTCTAGGTGTACTGA	FE673260.1	-	-	-	-	-	-	-	-	-	-	-	-	-	-	-	-
579	CATGATATCCGTCACTTTCACTCTCT	FE673259.1	-	-	-	-	-	-	-	-	-	-	-	-	-	-	-	-
580	CATGAGAGAAAGAGAGTTCCTCCAAA	FE673258.1	-	-	-	-	-	CX534169	3e-07	0	0	AF452454	1e-134	Glycine max ATP sulfurylase mRNA, complete cds	ATP sulfurylase	Q8SAG1_SOYBN	-	-
581	CATGGGACAAAGACAGTTGGTCTGCC	FE673257.1	-	-	-	-	-	-	-	-	-	-	-	-	-	-	-	-
583	CATGAGTAAACTTCTCGCTAGAACTA	FE673254.1	-	-	-	-	-	-	-	-	-	-	-	-	-	-	-	-
584	CATGAGTGACCCTAGTGGAAACTACG	FE673252.1	-	-	-	-	-	-	-	-	-	-	-	-	-	-	-	-
585	CATGCAGTTCGAGGCAACTACTCAGT	FE673250.1	-	-	-	-	-	-	-	-	-	-	-	-	-	-	-	-
586	CATGTTGCGTTATGTCAAGATTGTCT	FE673249.1	8e-07	-	AC161102	-	-	CX532327	8e-05	1	0	AC161102	8e-41	Cicer arietinum strain FLIP84-92C clone gl1-20l12, complete sequence	-	-	-	Correlated RNA description
588	CATGTATTTAAAGGTGAAGGATTTCC	FE673247.1	-	-	-	-	-	-	-	-	-	-	-	-	-	-	-	-
589	CATGCTTCACTGCCCAATCCTCAAGG	FE673246.1	-	-	-	-	-	-	-	-	-	-	-	-	-	-	-	-
591	CATGTGCTCAAAAATATGAGAAAAAT	FE673242.1	-	-	-	-	-	-	-	-	-	-	-	-	-	-	-	-
592	CATGGTCCGGATGTTCACCAGGCTGA	FE673241.1	1e-05	Glycine max myo-inositol-1-phosphate synthase (MIPS4) gene, complete cds	DQ323908	Myo-inositol-1-phosphate synthase	Q2MJR3_SOYBN	-	-	-	-	-	-	-	-	-	-	-
593	CATGTGAACCTTCCTTAAAATCCTCT	FE673240.1	-	-	-	-	-	-	-	-	-	-	-	-	-	-	-	-
594	CATGGTGTGCTTCCAAGGGGAACATA	FE673238.1	-	-	-	-	-	BG453269	8e-05	0	0	EF591762	2e-100	Prosopis juliflora Rab7 (Rab7) mRNA, complete cds	Rab7	A5YVS2_PROJU	-	-
595	CATGCTCCCGAGTTTGTTCCAAGAAG	FE673237.1	-	-	-	-	-	-	-	-	-	-	-	-	-	-	-	-
596	CATGATAGAAAGAAATCCAATTAAAA	FE673236.1	-	-	-	-	-	-	-	-	-	-	-	-	-	-	-	-
597	CATGTTTGAGCACATATTGCACCGAT	FE673235.1	-	-	-	-	-	-	-	-	-	-	-	-	-	-	-	-
598	CATGGGCGCGTTTCTCCTTGCTGCTG	FE673234.1	-	-	-	-	-	-	-	-	-	-	-	-	-	-	-	-
599	CATGCCACTAAATTGGATTTACAGTA	FE673232.1	-	-	-	-	-	-	-	-	-	-	-	-	-	-	-	-
600	CATGACTATAAAAGGGACCCACAAAA	FE673230.1	-	-	-	-	-	-	-	-	-	-	-	-	-	-	-	-
602	CATGGATGGGATTTAAACGCCGTTAG	FE673228.1	-	-	-	-	-	-	-	-	-	-	-	-	-	-	-	-
604	CATGAGGCTGAGATTGCCCAAGCTGC	FE673226.1	8e-07	Cicer arietinum mRNA for GTP-binding protein (ORF1), clone CanGBP-2	AJ299064	GTP-binding protein	Q9FSZ5_CICAR	-	-	-	-	-	-	-	-	-	-	-
605	CATGCATTGTCATTTAAAGTTGCACA	FE673224.1	-	-	-	-	-	-	-	-	-	-	-	-	-	-	-	-
606	CATGCCCGGTCGTACTCATAACCGCA	FE673223.1	8e-07	M.sativa 26S rRNA	Z11498	-	-	BG645078	3e-07	0	0	EF571299	0	Glycyrrhiza uralensis 26S ribosomal RNA, partial sequence	-	-	-	Correlated RNA description
607	CATGATGATTCTCCGGATTACACAAT	FE673222.1	-	-	-	-	-	-	-	-	-	-	-	-	-	-	-	-
609	CATGTAACGACGTTGAGTTCGTTCTG	FE673219.1	-	-	-	-	-	-	-	-	-	-	-	-	-	-	-	-
612	CATGCAATCTTGATTTATTTTTCAGT	FE673211.1	-	-	-	-	-	-	-	-	-	-	-	-	-	-	-	-
613	CATGAAAATGGATCTGCAAACACTCT	FE673210.1	-	-	-	-	-	-	-	-	-	-	-	-	-	-	-	-
614	CATGACACCTTTGACTTCAAAAACCT	FE672821.1	-	-	-	-	-	-	-	-	-	-	-	-	-	-	-	-
615	CATGAGAAAATGGGAGCCCTGTCGTA	FE672820.1	-	-	-	-	-	-	-	-	-	-	-	-	-	-	-	-
616	CATGAACCTGATACTCCCTCTCCGGG	FE672819.1	-	-	-	-	-	-	-	-	-	-	-	-	-	-	-	-
617	CATGTAGTGAAGATACTTTTGTACCA	FE672817.1	-	-	-	-	-	-	-	-	-	-	-	-	-	-	-	-
618	CATGGAGCGGATCAGGGGATGGAATT	FE672816.1	-	-	-	-	-	-	-	-	-	-	-	-	-	-	-	-
620	CATGCTTTGTGAGTCATACGGCAATA	FE672814.1	-	-	-	-	-	-	-	-	-	-	-	-	-	-	-	-
621	CATGTGGACGTTTAAGTGCAGCTCTT	FE672813.1	-	-	-	-	-	-	-	-	-	-	-	-	-	-	-	-
623	CATGGAACCGCAGACGGAGAATGAGA	FE672811.1	-	-	-	-	-	-	-	-	-	-	-	-	-	-	-	-
624	CATGCTGTGATTTAAGGGACTCCTCC	FE672810.1	-	-	-	-	-	-	-	-	-	-	-	-	-	-	-	-
625	CATGGCTTTCCAATCAAACCCCAATT	FE672809.1	-	-	-	-	-	-	-	-	-	-	-	-	-	-	-	-
626	CATGGATGAATGCGAAAGGGCTGTGC	FE672806.1	-	-	-	-	-	-	-	-	-	-	-	-	-	-	-	-
627	CATGACTTGAGTTCTATTGGTGGTAA	FE672805.1	-	-	-	-	-	-	-	-	-	-	-	-	-	-	-	-
628	CATGACAGGGGGCTTACACCTTACGA	FE672803.1	-	-	-	-	-	BI311245	3e-07	0	0	AJ344107	0	Lupinus albus mRNA for ATP citrate lyase a-subunit (acla gene)	ATP citrate lyase a-subunit; ( EC=4.1.3.8)	Q93YH4_LUPAL	-	-
629	CATGACAAGGCGCGCGGGGAAGGGTG	FE672802.1	-	-	-	-	-	-	-	-	-	-	-	-	-	-	-	-
630	CATGATATGATAATACTGCTGCCCTG	FE672800.1	-	-	-	-	-	-	-	-	-	-	-	-	-	-	-	-
631	CATGCCGATAAATTTAGAGGATTGAA	FE672799.1	-	-	-	-	-	-	-	-	-	-	-	-	-	-	-	-
632	CATGTTGTACGATGTTTTGACGAAAA	FE672797.1	-	-	-	-	-	-	-	-	-	-	-	-	-	-	-	-
633	CATGTGGTATAATTCGATACTACGCG	FE672795.1	-	-	-	-	-	-	-	-	-	-	-	-	-	-	-	-
634	CATGCAGAAAGGTTCCCCACTCCTCC	FE672794.1	8e-07	Cicer arietinum mRNA for catalase	AJ131046	Catalase (Fragment); ( EC=1	Q9ZRU4_CICAR	-	-	-	-	-	-	-	-	-	-	-
635	CATGGCGGTCCCGGTATGGGAGCAAT	FE672793.1	-	-	-	-	-	-	-	-	-	-	-	-	-	-	-	-
636	CATGACCAACCGCCTTCTCGCTCGGA	FE672792.1	-	-	-	-	-	-	-	-	-	-	-	-	-	-	-	-
638	CATGTGTCGTTGGCTTTAGGCCACCG	FE672790.1	-	-	-	-	-	-	-	-	-	-	-	-	-	-	-	-
639	CATGCGACCTGAACCTTTCGGTACCA	FE672787.1	-	-	-	-	-	-	-	-	-	-	-	-	-	-	-	-
640	CATGTAGTTCATCGGCGGAGGTCACA	FE672785.1	-	-	-	-	-	-	-	-	-	-	-	-	-	-	-	-
641	CATGGATTTGTGGTGGCGGTCACAGG	FE672783.1	-	-	-	-	-	-	-	-	-	-	-	-	-	-	-	-
642	CATGATGAACTTATTGCCAATGCTGC	FE672781.1	8e-07	Cicer arietinum mRNA for cytosolic fructose-1,6-bisphosphate aldolase	AJ005041	Fructose-bisphosphate aldolase, cytoplasmic isozyme; ( EC=4	ALF_CICAR	-	-	-	-	-	-	-	-	-	-	-
643	CATGCATCATCTTTCACAACAACCGT	FE672780.1	-	-	-	-	-	-	-	-	-	-	-	-	-	-	-	-
644	CATGAAGGGAAAAAACTACTTGGTCT	FE672778.1	-	-	-	-	-	-	-	-	-	-	-	-	-	-	-	-
645	CATGCTCTTCTCTCTATCTTCATAAA	FE672775.1	-	-	-	-	-	-	-	-	-	-	-	-	-	-	-	-
646	CATGCGGCGCAGCTCCACAACTCACA	FE672774.1	-	-	-	-	-	-	-	-	-	-	-	-	-	-	-	-
647	CATGTGAAGTTACAAGCCACCTCTTC	FE672773.1	-	-	-	-	-	-	-	-	-	-	-	-	-	-	-	-
648	CATGTTGAGCCTCTCAAAAGGACCTG	FE672771.1	-	-	-	-	-	-	-	-	-	-	-	-	-	-	-	-
649	CATGCGCGAACACAATGCTCGTTTTA	FE672770.1	-	-	-	-	-	-	-	-	-	-	-	-	-	-	-	-
650	CATGTGCAAATATCAACCTAATCAAC	FE672769.1	-	-	-	-	-	-	-	-	-	-	-	-	-	-	-	-
651	CATGAATGGTGCACCCTCCATCAGTG	FE672767.1	-	-	-	-	-	-	-	-	-	-	-	-	-	-	-	-
652	CATGTCGAAGTTCAGTAAAAGCTACG	FE672766.1	-	-	-	-	-	-	-	-	-	-	-	-	-	-	-	-
653	CATGGAAATGGAAGAAAAAGTCGAGA	FE672765.1	-	-	-	-	-	-	-	-	-	-	-	-	-	-	-	-
654	CATGCAATCTGCTGGTCAACCTGCTG	FE672763.1	-	-	-	-	-	-	-	-	-	-	-	-	-	-	-	-
655	CATGGAGACAATTTTTGGGAGAGAAC	FE672762.1	-	-	-	-	-	-	-	-	-	-	-	-	-	-	-	-
656	CATGCTGTTGCACCTGATCTAAGAGG	FE672761.1	-	-	-	-	-	-	-	-	-	-	-	-	-	-	-	-
657	CATGACGGCAGTAATTTTTGTAAAAA	FE672760.1	-	-	-	-	-	-	-	-	-	-	-	-	-	-	-	-
658	CATGTTCTGTTGAGTGTACTAAGGCA	FE672758.1	-	-	-	-	-	-	-	-	-	-	-	-	-	-	-	-
659	CATGATGACGCTGTTACAACTTTCGT	FE672757.1	-	-	-	-	-	-	-	-	-	-	-	-	-	-	-	-
660	CATGCAAGTCGGACGGGAAGTGGTGT	FE672756.1	8e-07	Canavalia gladiata cultivar NTU-CG01 19S ribosomal RNA gene, partial sequence; mitochondrial	EU835853	-	0	-	-	-	-	-	-	-	-	-	-	-
661	CATGATAAGCGTACCTATGTCTTTAT	FE672755.1	-	-	-	-	-	-	-	-	-	-	-	-	-	-	-	-
662	CATGCAAATAATAATAAGAGAGAAAA	FE672754.1	-	-	-	-	-	-	-	-	-	-	-	-	-	-	-	-
663	CATGGGGCATACGGTGGAGGGAGTGG	FE672752.1	-	-	-	-	-	-	-	-	-	-	-	-	-	-	-	-
664	CATGCTGACAGTTTACTGGTCCACAT	FE672751.1	-	-	-	-	-	CX528966	8e-05	1	0	AB197676	4e-64	Glycine max Gm sel-1 mRNA for SEL-1, complete cds	SEL-1	Q4R1J3_SOYBN	-	-
665	CATGACATCCAGTGTCCCTCCTGATG	FE672748.1	-	-	-	-	-	-	-	-	-	-	-	-	-	-	-	-
666	CATGCCCTCTAAATCTACGGCAGAAC	FE672746.1	-	-	-	-	-	-	-	-	-	-	-	-	-	-	-	-
667	CATGGGAACTGAAAAAAAGTACAAGT	FE672745.1	-	-	-	-	-	-	-	-	-	-	-	-	-	-	-	-
668	CATGTATTGAAGGCTTTAGGGGTTCT	FE672742.1	-	-	-	-	-	CA920732	8e-05	1	0	AF464906	2e-128	Glycine max repressor protein (Dr1) mRNA, complete cds	Repressor protein	Q8W0W5_SOYBN	-	-
669	CATGAGTGGACGGAGTGTCCGTACGC	FE672741.1	-	-	-	-	-	-	-	-	-	-	-	-	-	-	-	-
670	CATGCACGCTGTAAACCACGGCCGTG	FE672740.1	-	-	-	-	-	-	-	-	-	-	-	-	-	-	-	-
671	CATGACCAGGTAAGGATTTTGAAGTC	FE672739.1	-	-	-	-	-	-	-	-	-	-	-	-	-	-	-	-
672	CATGTCTCTCTCAGTCCTGAGCACTT	FE672738.1	-	-	-	-	-	-	-	-	-	-	-	-	-	-	-	-
673	CATGGATTCGAGTCTCTTTGGGAAAG	FE672735.1	-	-	-	-	-	-	-	-	-	-	-	-	-	-	-	-
674	CATGCAACCCTATCGGGTCACAGTTG	FE672734.1	-	-	-	-	-	-	-	-	-	-	-	-	-	-	-	-
675	CATGCGGATCCCGAATCGCCACCCTC	FE672730.1	-	-	-	-	-	-	-	-	-	-	-	-	-	-	-	-
676	CATGCTCCTTATAAACAGTCTTCCTC	FE671961.1	-	-	-	-	-	-	-	-	-	-	-	-	-	-	-	-
678	CATGACCTGTTTCAGTGAAATCAAAT	FE671957.1	-	-	-	-	-	-	-	-	-	-	-	-	-	-	-	-
680	CATGGTGCTAATCGCGGTACAGATAT	FE671954.1	-	-	-	-	-	-	-	-	-	-	-	-	-	-	-	-
681	CATGTGAAATACACGGACTACGTACG	FE671953.1	-	-	-	-	-	-	-	-	-	-	-	-	-	-	-	-
683	CATGAATGACTGGGTTTTGTCACTTT	FE671193.1	-	-	-	-	-	-	-	-	-	-	-	-	-	-	-	-
685	CATGGATAGGAAAATCTGTTCAATGA	FE671191.1	-	-	-	-	-	-	-	-	-	-	-	-	-	-	-	-
686	CATGTGGATACTGCATCATAAAACTG	FE671190.1	-	-	-	-	-	-	-	-	-	-	-	-	-	-	-	-
687	CATGATCTTAATGTTCCGTATGAGGG	FE671188.1	-	-	-	-	-	-	-	-	-	-	-	-	-	-	-	-
688	CATGGTTGATGAAGCCGAATCCGAAA	FE671187.1	-	-	-	-	-	-	-	-	-	-	-	-	-	-	-	-
689	CATGGCAGCATTGACGCTGATCTCAG	FE671186.1	-	-	-	-	-	BG588566	3e-07	0	0	AB078603	0	Pisum sativum SN4TDR mRNA for 110 kDa 4SNc-Tudor domain protein, complete cds	110 kDa 4SNc-Tudor domain protein	Q8L5C2_PEA	-	-
690	CATGGTAGCACCATTTCCTCCAAAAC	FE671185.1	-	-	-	-	-	AJ498125	3e-07	0	0	L20806	6e-91	Glycine max seed maturation protein (GmPM3) mRNA, complete cds	PGmPM3	Q39872_SOYBN	-	-
691	CATGTATAAGATGAGCCTCCATCACT	FE671184.1	8e-07	Cicer arietinum mRNA for lipid transfer protein	AJ002958	Non-specific lipid-transfer protein precursor; ( Short=LTP)	NLTP_CICAR	-	-	-	-	-	-	-	-	-	-	-
692	CATGAGTGAGCATTATGATATTCCTA	FE671183.1	-	-	-	-	-	-	-	-	-	-	-	-	-	-	-	-
693	CATGTCCGCCATTTCCGCTGTACTTT	FE671182.1	-	-	-	-	-	-	-	-	-	-	-	-	-	-	-	-
694	CATGCCGGTATTGGTGGAATGGGTGG	FE671947.1	-	-	-	-	-	-	-	-	-	-	-	-	-	-	-	-
695	CATGAAAAAGGATGTACTATGGGTTA	FE671945.1	-	-	-	-	-	-	-	-	-	-	-	-	-	-	-	-
696	CATGTCTTGGTTATCTTCGAGGTGGT	FE671943.1	-	-	-	-	-	-	-	-	-	-	-	-	-	-	-	-
697	CATGTGTGGACACGTGAAACGCCATC	FE671941.1	-	-	-	-	-	-	-	-	-	-	-	-	-	-	-	-
698	CATGTAAGAAAGTCAACGTTAACCGG	FE671940.1	-	-	-	-	-	-	-	-	-	-	-	-	-	-	-	-
699	CATGGCCCCCGAGTGTGGCCAAAATG	FE671939.1	-	-	-	-	-	-	-	-	-	-	-	-	-	-	-	-
700	CATGACCTCACTTGGGTTAACATTCT	FE671938.1	-	-	-	-	-	-	-	-	-	-	-	-	-	-	-	-
701	CATGCCGATGCCACTTCCACTTCCGC	FE671181.1	-	-	-	-	-	-	-	-	-	-	-	-	-	-	-	-
702	CATGAGTGATGTTTTGTTAAGATATA	FE671180.1	-	-	-	-	-	-	-	-	-	-	-	-	-	-	-	-
704	CATGTTGAGAAAAAAATCTGATCCAC	FE671178.1	-	-	-	-	-	-	-	-	-	-	-	-	-	-	-	-
705	CATGGGTGACACGTGGCTCGCTGACT	FE671177.1	-	-	-	-	-	-	-	-	-	-	-	-	-	-	-	-
706	CATGAAGCAGCCCACTTTTTGATTGC	FE671176.1	-	-	-	-	-	-	-	-	-	-	-	-	-	-	-	-
707	CATGGTTCCAAAGTACAACAAGGAAG	FE671175.1	-	-	-	-	-	-	-	-	-	-	-	-	-	-	-	-
708	CATGTATTCTAGGGCTACAACATTTA	FE671174.1	-	-	-	-	-	-	-	-	-	-	-	-	-	-	-	-
709	CATGTAGCCTTGGAGAAAGCCAAAAA	FE671173.1	-	-	-	-	-	-	-	-	-	-	-	-	-	-	-	-
710	CATGGATTTGAGGAACTTGGAGAGGG	FE671171.1	-	-	-	-	-	-	-	-	-	-	-	-	-	-	-	-
711	CATGCTAATGCTAATGCTTGTGCAAC	FE671170.1	-	-	-	-	-	-	-	-	-	-	-	-	-	-	-	-
712	CATGGAGATCTGCTGGGATGCGGCGC	FE671937.1	-	-	-	-	-	-	-	-	-	-	-	-	-	-	-	-
713	CATGATCCTAGGGATAATCAGTGTTC	FE671935.1	-	-	-	-	-	-	-	-	-	-	-	-	-	-	-	-
714	CATGGTGATCTAGTTATTTGTCTCAC	FE671933.1	-	-	-	-	-	-	-	-	-	-	-	-	-	-	-	-
717	CATGAAAAACAACCCTCTTGTGCAAT	FE671929.1	-	-	-	-	-	-	-	-	-	-	-	-	-	-	-	-
719	CATGCTGTCCTCCAAAAGTCTCATTA	FE671169.1	-	-	-	-	-	EV261803	8e-05	1	0	L09547	0	Pisum sativum (clone pCLp) nuclear encoded precursor to chloroplast protein mRNA, complete cds	ATP-dependent Clp protease ATP-binding subunit clpC homolog, chloroplastic precursor	CLPC_PEA	-	-
720	CATGAGGAGCGACCGCGGAGTACTCT	FE671167.1	-	-	-	-	-	-	-	-	-	-	-	-	-	-	-	-
721	CATGAGCCTTAAGATGTTCCTCTAAA	FE671166.1	-	-	-	-	-	-	-	-	-	-	-	-	-	-	-	-
722	CATGCATAACATCTGGACTTCAAACT	FE671165.1	-	-	-	-	-	-	-	-	-	-	-	-	-	-	-	-
723	CATGTTAAAGATTATGCTAGAGAGTA	FE671162.1	-	-	-	-	-	-	-	-	-	-	-	-	-	-	-	-
726	CATGTGTGGGCAACTTGGAACCACCC	FE671158.1	-	-	-	-	-	-	-	-	-	-	-	-	-	-	-	-
727	CATGAAAATTTGCATTTGTCGTTGTG	FE671925.1	-	-	-	-	-	-	-	-	-	-	-	-	-	-	-	-
728	CATGCTCTTCTACGGTCCTCCCGGCA	FE671923.1	-	-	-	-	-	-	-	-	-	-	-	-	-	-	-	-
729	CATGCTTGACACCAAGGGTCCTGAAG	FE671922.1	-	-	-	-	-	-	-	-	-	-	-	-	-	-	-	-
730	CATGGCTTGAGAGTAAAGGTTTGAAG	FE671919.1	-	-	-	-	-	-	-	-	-	-	-	-	-	-	-	-
732	CATGCCACATTAGCAGCTGCACAAAC	FE671917.1	-	-	-	-	-	-	-	-	-	-	-	-	-	-	-	-
733	CATGATGAAGTGAAAACTGTGCTTAA	FE671916.1	-	-	-	-	-	-	-	-	-	-	-	-	-	-	-	-
734	CATGATCAAAAAAATTGCCTACAAAA	FE671915.1	-	-	-	-	-	-	-	-	-	-	-	-	-	-	-	-
735	CATGGCGGCGGCCTCGTCTTCGTCTC	FE671914.1	-	-	-	-	-	-	-	-	-	-	-	-	-	-	-	-
736	CATGAAGTATGTCTCCTCTACACTAT	FE671157.1	-	-	-	-	-	-	-	-	-	-	-	-	-	-	-	-
737	CATGGAGTCTTCGTGTTCGTCGGAAG	FE671155.1	-	-	-	-	-	-	-	-	-	-	-	-	-	-	-	-
738	CATGTCCGCAATGGGAGAAGAACAGA	FE671153.1	-	-	-	-	-	-	-	-	-	-	-	-	-	-	-	-
739	CATGGTTTCGAGAGCGCAACGATTTC	FE671152.1	-	-	-	-	-	-	-	-	-	-	-	-	-	-	-	-
742	CATGTCTACTCCGGCGAAACGACTCT	FE671146.1	-	-	-	-	-	-	-	-	-	-	-	-	-	-	-	-
743	CATGTGGTCAGGCATTAATTAAGCAA	FE671912.1	-	-	-	-	-	-	-	-	-	-	-	-	-	-	-	-
744	CATGTTGTGGTGGAGTGAAGAGAGTT	FE671910.1	-	-	-	-	-	-	-	-	-	-	-	-	-	-	-	-
745	CATGTTACTCTCAGCCTCAGTGAACT	FE671909.1	-	-	-	-	-	CX541021	8e-05	1	0	AJ319667	0	Medicago sativa subsp. falcata mRNA for beta-tubulin	Beta-tubulin	Q949G6_MEDFA	-	-
746	CATGACAAGGAGAACATTCTTAATCA	FE671908.1	-	-	-	-	-	-	-	-	-	-	-	-	-	-	-	-
747	CATGAGTATGTTGGTAAGTATCAGGA	FE671907.1	-	-	-	-	-	-	-	-	-	-	-	-	-	-	-	-
748	CATGTGCAATCGCAGATTCGTTCAAG	FE671905.1	-	-	-	-	-	-	-	-	-	-	-	-	-	-	-	-
749	CATGTTAATGACCCGATACAATTTTT	FE671902.1	-	-	-	-	-	-	-	-	-	-	-	-	-	-	-	-
750	CATGAACCATCCAGGACAGATCGGAA	FE671145.1	8e-07	Cicer arietinum mRNA for elongation factor 1-alpha (clone CanEF1-a2), partial	AJ010225	Elongation factor 1-alpha (Fragment)	Q9SB99_CICAR	-	-	-	-	-	-	-	-	-	-	-
752	CATGTCAGTCCTTATCAAATATGCAA	FE671142.1	-	-	-	-	-	-	-	-	-	-	-	-	-	-	-	-
754	CATGGGTATGATTTAAGGTGGAAAAC	FE671140.1	-	-	-	-	-	-	-	-	-	-	-	-	-	-	-	-
755	CATGAGGAATTTCACAGTTCCGCTCA	FE671139.1	8e-07	Pisum sativum serine/threonine protein phosphatase 2A mRNA, complete cds	AF305635	Phytochrome-associated serine/threonine protein phosphatase; ( EC=3	FYPP_PEA	AJ502077	5e-06	0	0	AF305635	0	Pisum sativum serine/threonine protein phosphatase 2A mRNA, complete cds	Phytochrome-associated serine/threonine protein phosphatase; ( EC=3.1.3.16; AltName	FYPP_PEA	correlated ID	-
756	CATGTTTTCCAATCGAGGCAGTTTAT	FE671137.1	-	-	-	-	-	-	-	-	-	-	-	-	-	-	-	-
757	CATGAAGGATGCTCTCATACAGCAAG	FE671136.1	-	-	-	-	-	-	-	-	-	-	-	-	-	-	-	-
758	CATGGATCCCGTCCTTGGCCAAGCCA	FE671134.1	-	-	-	-	-	-	-	-	-	-	-	-	-	-	-	-
760	CATGCAATGAAGAAGATTTTGCTCTT	FE671898.1	-	-	-	-	-	-	-	-	-	-	-	-	-	-	-	-
761	CATGATAAAGAATCCAACTGTACAAA	FE671896.1	-	-	-	-	-	-	-	-	-	-	-	-	-	-	-	-
762	CATGCATCTACTCCATCTTGATGCTC	FE671895.1	-	-	-	-	-	-	-	-	-	-	-	-	-	-	-	-
763	CATGCAAAGACCACAGAATTCAAAGG	FE671894.1	-	-	-	-	-	-	-	-	-	-	-	-	-	-	-	-
764	CATGAAGTTCCCTGTCCGTGCACGGA	FE671893.1	-	-	-	-	-	-	-	-	-	-	-	-	-	-	-	-
765	CATGTTCCATTGATAGACAGACTTAG	FE671891.1	-	-	-	-	-	-	-	-	-	-	-	-	-	-	-	-
766	CATGTTGAATGTAAATTTGCTTATGC	FE671890.1	-	-	-	-	-	-	-	-	-	-	-	-	-	-	-	-
768	CATGGGGCTACCAAAAAATTTAGGAT	FE671130.1	-	-	-	-	-	-	-	-	-	-	-	-	-	-	-	-
769	CATGAGGAGCGGGGGCCCGGAGTCTC	FE671129.1	-	-	-	-	-	-	-	-	-	-	-	-	-	-	-	-
771	CATGTACTAGGGTGTATGTGCGACTC	FE671127.1	-	-	-	-	-	DW019062	3e-07	0	0	AC145820	0	Cicer arietinum strain WR-315, cultivar clone cpchlor map chloroplast, complete sequence	-	-	-	-
773	CATGTTGTTTGATAGAACAACAACCT	FE671125.1	-	-	-	-	-	-	-	-	-	-	-	-	-	-	-	-
774	CATGTTATATATATAATGCGTAAATA	FE671124.1	-	-	-	-	-	-	-	-	-	-	-	-	-	-	-	-
775	CATGTACACATTCAAATGCTGATATC	FE671123.1	-	-	-	-	-	-	-	-	-	-	-	-	-	-	-	-
776	CATGTGACCCGGAGTTGGTGAAGCTA	FE671122.1	-	-	-	-	-	BQ151608	3e-07	0	0	AY167669	5e-05	Pisum sativum heat shock protein mRNA, complete cds	Heat shock protein	Q8H1A6_PEA	-	-
777	CATGTGTGAGTGATCGCAATTGTGCT	FE671889.1	-	-	-	-	-	-	-	-	-	-	-	-	-	-	-	-
778	CATGTCGATGAAAGAGTGCGACCACC	FE671887.1	-	-	-	-	-	-	-	-	-	-	-	-	-	-	-	-
779	CATGAGGGGATTTACCCCCTCAACAC	FE671886.1	-	-	-	-	-	-	-	-	-	-	-	-	-	-	-	-
780	CATGTTCTTGTCACTCAATTCAAGGT	FE671885.1	-	-	-	-	-	CX539992	5e-06	0	0	EU041722	0	Pisum sativum fiddlehead-like protein mRNA, partial cds	Fiddlehead-like protein (Fragment)	A7X6P9_PEA	-	-
781	CATGAAAGGCAGGAAAAAGAGGAATC	FE671884.1	-	-	-	-	-	-	-	-	-	-	-	-	-	-	-	-
782	CATGAAGTGATTGTTACTTTGGATTG	FE671883.1	-	-	-	-	-	-	-	-	-	-	-	-	-	-	-	-
783	CATGGAATGGCTAATGGCACAGAAAT	FE671882.1	-	-	-	-	-	-	-	-	-	-	-	-	-	-	-	-
784	CATGTCGGTGTCAATACGCATTGTTA	FE671879.1	-	-	-	-	-	-	-	-	-	-	-	-	-	-	-	-
785	CATGGAGTTCCCACAAATCAGTGCAT	FE671878.1	-	-	-	-	-	-	-	-	-	-	-	-	-	-	-	-
787	CATGCATAATGGTTTGGGGGGCACAA	FE671118.1	-	-	-	-	-	-	-	-	-	-	-	-	-	-	-	-
788	CATGTTGTTGAGGAGTGCAAATTGAG	FE671117.1	-	-	-	-	-	BI270677	8e-05	1	0	EU189944	2e-10	Medicago truncatula vesicle-associated protein mRNA, complete cds	Vesicle-associated protein	A8W459_MEDTR	-	-
789	CATGACATAATTTATAATGGTGTTGG	FE671116.1	-	-	-	-	-	-	-	-	-	-	-	-	-	-	-	-
790	CATGATTGTGTAATTTGTTGATGGAT	FE671115.1	-	-	-	-	-	-	-	-	-	-	-	-	-	-	-	-
794	CATGTTTTGGGTTTGCAGCCAAAATG	FE671110.1	-	-	-	-	-	-	-	-	-	-	-	-	-	-	-	-
795	CATGCCACAACAACATCCAAATGACG	FE671877.1	-	-	-	-	-	-	-	-	-	-	-	-	-	-	-	-
796	CATGCCGGTGAAACGACGACGTATGC	FE671873.1	-	-	-	-	-	-	-	-	-	-	-	-	-	-	-	-
798	CATGATCTACAGATTGCTCCCACTTC	FE671868.1	3e-06	Medicago sativa partial mRNA for gamma-glutamylcysteinyl synthetase (ECS gene), cultivar Aragon	AM407888	Gamma-glutamylcysteinyl synthetase (Fragment)	Q05FZ9_MEDSA	BE248273	1e-06	0	0	AF041340	0	Medicago truncatula gamma-glutamylcysteine synthetase mRNA, nuclear gene encoding putative plastid protein, complete cds	Glutamate--cysteine ligase, chloroplastic precursor; ( EC=6.3.2.2; AltName	GSH1_MEDTR	no	Correlated protein name
799	CATGGAAATTTAAACTGACTCATCTC	FE671867.1	-	-	-	-	-	-	-	-	-	-	-	-	-	-	-	-
801	CATGAATGTATAATTGCTTAACCAAT	FE671109.1	-	-	-	-	-	-	-	-	-	-	-	-	-	-	-	-
802	CATGTTACCCACCACCAACCGGAAGT	FE671108.1	-	-	-	-	-	-	-	-	-	-	-	-	-	-	-	-
803	CATGGACTCGGAAACATCTATTATCA	FE671107.1	-	-	-	-	-	-	-	-	-	-	-	-	-	-	-	-
804	CATGTAGGAACAAGGTGCAAGTGTAC	FE671105.1	-	-	-	-	-	-	-	-	-	-	-	-	-	-	-	-
805	CATGCAGTGTACTCTTCCACCATTGC	FE671104.1	8e-07	Cicer arietinum mRNA for ribulose 1,5-bisphosphate carboxylase small subunit	AJ131050	Ribulose 1,5-bisphosphate carboxylase small subunit precursor; ( EC=4	Q9ZP07_CICAR	EV259500	8e-05	1	0	AJ131050	5e-141	Cicer arietinum mRNA for ribulose 1,5-bisphosphate carboxylase small subunit	Ribulose 1,5-bisphosphate carboxylase small subunit precursor; ( EC=4.1.1.39)	Q9ZP07_CICAR	correlated ID	-
806	CATGATATCAACTCACACCTTAACCA	FE671103.1	-	-	-	-	-	-	-	-	-	-	-	-	-	-	-	-
807	CATGATTAAAATGGTCACGTGGATGA	FE671102.1	-	-	-	-	-	-	-	-	-	-	-	-	-	-	-	-
808	CATGATAGGAAAGTTCAGTCAGAGTC	FE671100.1	-	-	-	-	-	-	-	-	-	-	-	-	-	-	-	-
809	CATGATATATGTCTGTTGGATACGAG	FE671099.1	-	-	-	-	-	-	-	-	-	-	-	-	-	-	-	-
810	CATGTTCGTTCTCGGTGGTATTGGGA	FE671098.1	-	-	-	-	-	-	-	-	-	-	-	-	-	-	-	-
811	CATGGAAGACCACTGCTTTCTGTCGC	FE672345.1	-	-	-	-	-	-	-	-	-	-	-	-	-	-	-	-
812	CATGACACCCCACAAACCTTCACTTG	FE672344.1	-	-	-	-	-	-	-	-	-	-	-	-	-	-	-	-
814	CATGTGCTTCTTATTATATGTGACTC	FE672342.1	-	-	-	-	-	-	-	-	-	-	-	-	-	-	-	-
815	CATGTCCTCTTATTGAAATTTGCCAC	FE672341.1	-	-	-	-	-	-	-	-	-	-	-	-	-	-	-	-
816	CATGAAGCAATAACAAGCCAAAAAAC	FE672340.1	-	-	-	-	-	-	-	-	-	-	-	-	-	-	-	-
817	CATGCTTCACATAATCCAGATCGCCA	FE672339.1	-	-	-	-	-	-	-	-	-	-	-	-	-	-	-	-
818	CATGTGAAATGGGTGCATAAGAATAT	FE672338.1	8e-07	-	-	-	-	BG456727	8e-05	1	0	M11005	0	Pea chloroplast PGII gene encoding a 34.5-kd putative thylakoid membrane protein, complete cds	Photosystem Q(B) protein precursor; (AltName	PSBA_PEA	-	-
819	CATGTTGATCTGACCGGACTTTATGG	FE672337.1	-	-	-	-	-	-	-	-	-	-	-	-	-	-	-	-
820	CATGGAATTGGCCACCANATTAGCCT	FE672336.1	-	-	-	-	-	-	-	-	-	-	-	-	-	-	-	-
821	CATGGTGTTCCCGTTTTTCTTCTTTC	FE672335.1	-	-	-	-	-	-	-	-	-	-	-	-	-	-	-	-
822	CATGGCTGCATTAGCGGGAGCAAATT	FE672334.1	-	-	-	-	-	-	-	-	-	-	-	-	-	-	-	-
824	CATGGAGCAAGACAACTTGATTATGT	FE672331.1	-	-	-	-	-	-	-	-	-	-	-	-	-	-	-	-
825	CATGCCTACAACCAAAGGAGAGAGTA	FE672330.1	-	-	-	-	-	-	-	-	-	-	-	-	-	-	-	-
827	CATGACTTGGAGGGCTCTCAAGCACT	FE672328.1	-	-	-	-	-	-	-	-	-	-	-	-	-	-	-	-
829	CATGGGCTTTAGTTTGTTTGATTAGG	FE672326.1	-	-	-	-	-	-	-	-	-	-	-	-	-	-	-	-
832	CATGGGCCCTTGTACTCTGGGTTAGC	FE672322.1	-	-	-	-	-	-	-	-	-	-	-	-	-	-	-	-
833	CATGTGCTTTACGGTTCGTTCCAAGA	FE672321.1	-	-	-	-	-	-	-	-	-	-	-	-	-	-	-	-
834	CATGTCACCTTAGTTCATCGATCTAT	FE672320.1	-	-	-	-	-	-	-	-	-	-	-	-	-	-	-	-
836	CATGATTTCAAATTTGGAAAATTTTC	FE672318.1	-	-	-	-	-	-	-	-	-	-	-	-	-	-	-	-
837	CATGAAGGAGGAGCTGAATGCCCAGA	FE672316.1	-	-	-	-	-	-	-	-	-	-	-	-	-	-	-	-
839	CATGAGGACGACTTAGTGATAGAGCT	FE672314.1	-	-	-	-	-	-	-	-	-	-	-	-	-	-	-	-
844	CATGACGGTGCCGTTTTTCACAAACA	FE672304.1	8e-07	Cicer arietinum mRNA for Trans-Cinnamate 4-Monooxygenase	AJ007449	Trans-cinnamate 4-monooxygenase; ( EC=1	TCMO_CICAR	-	-	-	-	-	-	-	-	-	-	-
845	CATGTGACCTATCGAACCTGTCACCT	FE672303.1	-	-	-	-	-	-	-	-	-	-	-	-	-	-	-	-
846	CATGGATTCAAACTCTTTAGCATCCA	FE672301.1	-	-	-	-	-	-	-	-	-	-	-	-	-	-	-	-
847	CATGAAAGCTGGCAGAATAGTCCAAA	FE672300.1	-	-	-	-	-	-	-	-	-	-	-	-	-	-	-	-
848	CATGTTTTAATAAACTAATGATGACT	FE672299.1	-	-	-	-	-	-	-	-	-	-	-	-	-	-	-	-
850	CATGTTATTTCAATCCTCCTTCCATC	FE672297.1	-	-	-	-	-	-	-	-	-	-	-	-	-	-	-	-
851	CATGCAAGATCTAGAGACTGGAAGAT	FE672294.1	5e-05	Medicago truncatula vacuolar H+-ATPase B subunit mRNA, complete cds	EF153483	Vacuolar H+-ATPase B subunit	A6Y950_MEDTR	CA918426	2e-05	0	0	EF153483	0	Medicago truncatula vacuolar H+-ATPase B subunit mRNA, complete cds	Vacuolar H+-ATPase B subunit	A6Y950_MEDTR	correlated ID	-
852	CATGTGCACCCCATCCTCCGTATGTA	FE672293.1	-	-	-	-	-	-	-	-	-	-	-	-	-	-	-	-
853	CATGCTGCTAGTTTGGTGCTTGAAGC	FE672292.1	-	-	-	-	-	-	-	-	-	-	-	-	-	-	-	-
854	CATGCAACCACCGGAGATCGTTGGTG	FE672291.1	-	-	-	-	-	-	-	-	-	-	-	-	-	-	-	-
855	CATGGCAAAGGTCGGATGACAAGATC	FE672287.1	-	-	-	-	-	-	-	-	-	-	-	-	-	-	-	-
856	CATGAAGAATGTCTCTATGCCTAGCC	FE672285.1	-	-	-	-	-	-	-	-	-	-	-	-	-	-	-	-
857	CATGGTTCGAATGCAAGCCGATGGAA	FE672284.1	-	-	-	-	-	EX530435	5e-06	0	0	AB236842	0	Trifolium pratense RNA for putative mitochondrial dicarboxylate carrier protein, complete cds, clone: C331	Putative mitochondrial dicarboxylate carrier protein	Q2PEQ8_TRIPR	-	-
858	CATGGCTTTTGTCATTATCTATCTTT	FE672283.1	-	-	-	-	-	-	-	-	-	-	-	-	-	-	-	-
860	CATGCTCGGAGTTTCGCAAAGATAAC	FE672281.1	-	-	-	-	-	-	-	-	-	-	-	-	-	-	-	-
861	CATGGCTTCCTTAAGCGTCCTAGTGT	FE672280.1	-	-	-	-	-	BI309336	8e-05	1	0	L23504	0	Medicago truncatula early nodulin (protein-rich protein PRP4) gene, complete cds	Nodulin precursor	Q40376_MEDTR	-	-
864	CATGGCAATTCATTACACTTGGTCAC	FE672276.1	-	-	-	-	-	-	-	-	-	-	-	-	-	-	-	-
865	CATGGTATAATTATTGAATTTTCTGA	FE672274.1	-	-	-	-	-	-	-	-	-	-	-	-	-	-	-	-
868	CATGTGTAACTCCAATCACATCAAAG	FE672271.1	-	-	-	-	-	-	-	-	-	-	-	-	-	-	-	-
869	CATGGTTGCACTGGTGTGGCAGCAAG	FE672270.1	-	-	-	-	-	AW696063	8e-05	1	0	BK005807	3e-83	TPA_inf: Medicago truncatula class III HD-Zip protein CNA2 genes, partial cds	-	-	-	-
870	CATGTTTATCAGAAATCACAAATCCC	FE672268.1	-	-	-	-	-	-	-	-	-	-	-	-	-	-	-	-
871	CATGTTGGCGGAAAATAATAGCAGCT	FE672266.1	-	-	-	-	-	-	-	-	-	-	-	-	-	-	-	-
872	CATGAGAGTAGCCAGCAGGAGGATAA	FE672263.1	-	-	-	-	-	-	-	-	-	-	-	-	-	-	-	-
873	CATGATCTGATCGGATATTTGCAACT	FE672262.1	-	-	-	-	-	-	-	-	-	-	-	-	-	-	-	-
874	CATGGATCGTGAGTTCTTCATTTTTT	FE672261.1	-	-	-	-	-	-	-	-	-	-	-	-	-	-	-	-
875	CATGCCCTGGTTTGCATAACTGATAC	FE672260.1	-	-	-	-	-	-	-	-	-	-	-	-	-	-	-	-
876	CATGGAAGAAGTGTTGCTGTTATGTG	FE672257.1	-	-	-	-	-	AJ846426	8e-05	1	0	AC187294	3e-45	-	-	-	-	-
878	CATGCTGTCCCATAATCAATCTACAT	FE672255.1	-	-	-	-	-	-	-	-	-	-	-	-	-	-	-	-
879	CATGGATACACATACTAAGAAATGCA	FE672254.1	-	-	-	-	-	-	-	-	-	-	-	-	-	-	-	-
880	CATGCATCCAAAGCAGTGCAACGTAG	FE672252.1	-	-	-	-	-	-	-	-	-	-	-	-	-	-	-	-
882	CATGTTTGCGAGCTGGACACCCTCTC	FE672728.1	-	-	-	-	-	-	-	-	-	-	-	-	-	-	-	-
883	CATGCAGCTAGAAGGGACAGGGGGAA	FE672727.1	-	-	-	-	-	-	-	-	-	-	-	-	-	-	-	-
884	CATGTATAAGATGAGCCGCCATCACT	FE672725.1	-	-	-	-	-	-	-	-	-	-	-	-	-	-	-	-
885	CATGCTCAAATAATGAATGTCATATG	FE672724.1	-	-	-	-	-	-	-	-	-	-	-	-	-	-	-	-
886	CATGTAACCACGGCAAAGGCTGAAAA	FE672723.1	-	-	-	-	-	-	-	-	-	-	-	-	-	-	-	-
887	CATGTTACCCGGCCTGTACAGGATTA	FE672722.1	-	-	-	-	-	-	-	-	-	-	-	-	-	-	-	-
888	CATGTAGTTATGGGACCAACACAGGT	FE672719.1	-	-	-	-	-	-	-	-	-	-	-	-	-	-	-	-
889	CATGGTTATCCACCTGTTCCGCTAAA	FE672717.1	-	-	-	-	-	-	-	-	-	-	-	-	-	-	-	-
890	CATGCTGTGAACATCGCGTTTGTATC	FE672716.1	-	-	-	-	-	-	-	-	-	-	-	-	-	-	-	-
891	CATGCATAACGTCCATACCAAGGTTA	FE672715.1	-	-	-	-	-	-	-	-	-	-	-	-	-	-	-	-
893	CATGGAATTGGTGGACCCACCCGAAA	FE672711.1	-	-	-	-	-	-	-	-	-	-	-	-	-	-	-	-
894	CATGGATGCATCAAATCTTTACCCTT	FE672710.1	-	-	-	-	-	-	-	-	-	-	-	-	-	-	-	-
895	CATGAATAAATTGGTTATGAATTTCC	FE672707.1	-	-	-	-	-	EV260936	8e-05	1	0	DQ889604	2e-35	Arachis hypogaea clone 1Q68 PG4-like mRNA, partial sequence	-	-	-	-
896	CATGCGCGCTCTAGCCCTGAGCACTG	FE672706.1	-	-	-	-	-	-	-	-	-	-	-	-	-	-	-	-
897	CATGGCAATTCCGTCGGAAAATAGCC	FE672704.1	-	-	-	-	-	-	-	-	-	-	-	-	-	-	-	-
898	CATGCCAGAATTTCTTGTTCTGTTGC	FE672703.1	-	-	-	-	-	BG448849	8e-05	1	0	AF020269	0	Medicago sativa chloroplast malate dehydrogenase precursor (p1mdh) mRNA, nuclear gene encoding chloroplast protein, complete cds	Malate dehydrogenase [NADP], chloroplastic precursor; ( EC=1.1.1.82; AltName	MDHP_MEDSA	-	-
899	CATGGCACTTAAGGCTGCTTCTGGTT	FE672702.1	-	-	-	-	-	-	-	-	-	-	-	-	-	-	-	-
900	CATGGCTACTATTACATCCATCAAGG	FE672701.1	-	-	-	-	-	-	-	-	-	-	-	-	-	-	-	-
901	CATGATCGAATGTATAGGATAGGTGG	FE672697.1	-	-	-	-	-	-	-	-	-	-	-	-	-	-	-	-
902	CATGATACTCCTCTCAGCTCTTGAAA	FE672691.1	-	-	-	-	-	-	-	-	-	-	-	-	-	-	-	-
903	CATGATAGGAACAGCAGACATCGAAA	FE672689.1	-	-	-	-	-	-	-	-	-	-	-	-	-	-	-	-
904	CATGGCAAATATTCAAAATATACTGA	FE672687.1	-	-	-	-	-	-	-	-	-	-	-	-	-	-	-	-
905	CATGCTGTGTCGTGTTGCACCGTGTC	FE672686.1	-	-	-	-	-	-	-	-	-	-	-	-	-	-	-	-
906	CATGAGGCCAAAAGGGGTGTTTCAGT	FE672685.1	-	-	-	-	-	-	-	-	-	-	-	-	-	-	-	-
907	CATGGCATCACTACTTCTTGCATCAC	FE672684.1	-	-	-	-	-	-	-	-	-	-	-	-	-	-	-	-
908	CATGGCCGCGATTTCTAGGCGCGTGC	FE672683.1	-	-	-	-	-	-	-	-	-	-	-	-	-	-	-	-
909	CATGACAGAAGCTTTGGTTTGAGGAA	FE672682.1	8e-07	Cicer arietinum mRNA for cationic peroxidase	AJ271660	Cationic peroxidase; ( EC=1	Q9FT05_CICAR	ES611811	2e-05	0	0	AJ271660	0	Cicer arietinum mRNA for cationic peroxidase	Cationic peroxidase; ( EC=1.11.1.7)	Q9FT05_CICAR	correlated ID	-
910	CATGTCAGTATTACATCTTAGATTGT	FE672680.1	-	-	-	-	-	-	-	-	-	-	-	-	-	-	-	-
911	CATGCTAGTACCAGTAATATTCTTAG	FE672679.1	-	-	-	-	-	-	-	-	-	-	-	-	-	-	-	-
912	CATGAGATACAAACAAGCCTAGGAAA	FE672677.1	-	-	-	-	-	-	-	-	-	-	-	-	-	-	-	-
913	CATGATTCAGGGGATCCTCGTAATTT	FE672676.1	-	-	-	-	-	DW016246	3e-07	0	0	AJ299066	8e-66	Cicer arietinum partial mRNA for ubiquitin-conjugating enzyme E2 (ORF1), clone CanUBC-2	Ubiquitin-conjugating enzyme E2 (Fragment); ( EC=6.3.2.19)	Q9FSZ3_CICAR	-	-
914	CATGTGATTTACCAATCTAAGTGTAT	FE672675.1	-	-	-	-	-	-	-	-	-	-	-	-	-	-	-	-
915	CATGGTCGTAAAGAGTCACCACTTGA	FE672674.1	-	-	-	-	-	-	-	-	-	-	-	-	-	-	-	-
916	CATGGGATTCACCTAAAGAACAAATC	FE672673.1	-	-	-	-	-	BF520240	8e-05	1	0	AY843524	1e-128	Ammopiptanthus mongolicus clone B54 cold-induced mRNA	-	-	-	-
917	CATGTTGTATCACGAGGTACAAGAAT	FE672672.1	-	-	-	-	-	-	-	-	-	-	-	-	-	-	-	-
918	CATGACCCAGGTGCTGATGGAAAAAT	FE672671.1	8e-07	Cicer arietinum mRNA for putative universal stress protein (Usp gene)	AJ630657	Putative universal stress protein	Q700A7_CICAR	-	-	-	-	-	-	-	-	-	-	-
919	CATGCCACCAGAAAGAGATTTCACAA	FE672669.1	-	-	-	-	-	-	-	-	-	-	-	-	-	-	-	-
920	CATGAATCCCTCAATGCAAACTCATC	FE672668.1	-	-	-	-	-	-	-	-	-	-	-	-	-	-	-	-
922	CATGATCTTCGCTCTCGTTTATTGTA	FE672665.1	-	-	-	-	-	-	-	-	-	-	-	-	-	-	-	-
923	CATGACAAAACTTCACCCTGAAGATT	FE672664.1	-	-	-	-	-	-	-	-	-	-	-	-	-	-	-	-
924	CATGTATCTTACGCCCTTGTCTTCAA	FE672663.1	-	-	-	-	-	CX539360	8e-05	1	0	DQ787782	6e-56	Caragana korshinskii lateral organ boundaries domain protein mRNA, complete cds	Lateral organ boundaries domain protein	Q0PN09_9FABA	-	-
925	CATGTTCAATTTGCTCGTTCCCAACA	FE672661.1	-	-	-	-	-	-	-	-	-	-	-	-	-	-	-	-
928	CATGAATTCATTTATTTGCATATTCC	FE672658.1	-	-	-	-	-	-	-	-	-	-	-	-	-	-	-	-
930	CATGGTTAACACCTTCTTCCCTTTTC	FE672656.1	-	-	-	-	-	-	-	-	-	-	-	-	-	-	-	-
931	CATGAAAGAGGAAGATATCAGTAAAG	FE672653.1	-	-	-	-	-	-	-	-	-	-	-	-	-	-	-	-
933	CATGCAGAGATGGGGAAACAGGAGGC	FE672651.1	-	-	-	-	-	-	-	-	-	-	-	-	-	-	-	-
935	CATGGAGAAGTGACAGTTTAGCATCT	FE672649.1	-	-	-	-	-	-	-	-	-	-	-	-	-	-	-	-
936	CATGCCGATATTCAGTAGAGGGTCAC	FE672647.1	-	-	-	-	-	-	-	-	-	-	-	-	-	-	-	-
937	CATGGACTGGATGGGCTAAAAAGAAA	FE672645.1	-	-	-	-	-	-	-	-	-	-	-	-	-	-	-	-
938	CATGCTACAATGGGCGCATCTCTTCC	FE672644.1	-	-	-	-	-	-	-	-	-	-	-	-	-	-	-	-
939	CATGGAGATAATTCAAAATCCCAGAC	FE672643.1	-	-	-	-	-	-	-	-	-	-	-	-	-	-	-	-
940	CATGTGATGGATCGAGAAGGTGGAGG	FE672642.1	-	-	-	-	-	-	-	-	-	-	-	-	-	-	-	-
941	CATGAAAGGCAAACCCACCAGATACA	FE672638.1	-	-	-	-	-	-	-	-	-	-	-	-	-	-	-	-
943	CATGGCCATCCCAAAATCGCTTTCTT	FE672635.1	-	-	-	-	-	-	-	-	-	-	-	-	-	-	-	-
944	CATGACACCTCTGTTCCACTGTCAAC	FE672634.1	-	-	-	-	-	-	-	-	-	-	-	-	-	-	-	-
945	CATGTTGTTCAAAACTTTTTGGAAAT	FE673533.1	-	-	-	-	-	-	-	-	-	-	-	-	-	-	-	-
947	CATGAGGATAGACCTGACATAGATGA	FE673531.1	-	-	-	-	-	-	-	-	-	-	-	-	-	-	-	-
949	CATGCTATTCTAAGCACTTACGGGGT	FE673529.1	-	-	-	-	-	-	-	-	-	-	-	-	-	-	-	-
950	CATGAGTTACAAAATGGTGAAGATTG	FE673528.1	-	-	-	-	-	-	-	-	-	-	-	-	-	-	-	-
951	CATGGAATGGTGTAGTGAGCACAATA	FE673526.1	-	-	-	-	-	-	-	-	-	-	-	-	-	-	-	-
952	CATGGGCTTTCGTGCGTAAATATTGC	FE673524.1	-	-	-	-	-	-	-	-	-	-	-	-	-	-	-	-
953	CATGGACCAAAAACCTATGGCCGGTC	FE673523.1	-	-	-	-	-	BE318658	8e-05	1	0	AY219869	2e-12	Glycine latifolia drought-induced protein 1 mRNA, complete cds	Drought-induced protein 1	Q6XPS8_9FABA	-	-
954	CATGTGTCTCAATTACTTTTGCACCT	FE673522.1	-	-	-	-	-	-	-	-	-	-	-	-	-	-	-	-
955	CATGAAGATCCTGGTAATATTAGTTA	FE673519.1	-	-	-	-	-	-	-	-	-	-	-	-	-	-	-	-
956	CATGTAATCCTCAAACACAAATTTTG	FE673518.1	8e-07	Medicago truncatula 1-aminocyclopropanecarboxylic acid oxidase mRNA, complete cds	AY062251	1-aminocyclopropanecarboxylic acid oxidase	Q8VZX7_MEDTR	AJ497559	3e-07	0	0	AY062251	0	Medicago truncatula 1-aminocyclopropanecarboxylic acid oxidase mRNA, complete cds	1-aminocyclopropanecarboxylic acid oxidase	Q8VZX7_MEDTR	correlated ID	-
957	CATGGTTGGACACTTTATGAGATACT	FE673517.1	-	-	-	-	-	-	-	-	-	-	-	-	-	-	-	-
958	CATGTCTACCGCCACAATTCGCCGTC	FE673516.1	-	-	-	-	-	-	-	-	-	-	-	-	-	-	-	-
959	CATGGATCCCGTCATTACACGTGGCA	FE673515.1	-	-	-	-	-	-	-	-	-	-	-	-	-	-	-	-
960	CATGGCTAATCTACCGTTCTTAATTT	FE673514.1	5e-05	Cicer arietinum mRNA for chlorophyll a/b binding protein	AJ131044	Chlorophyll a/b binding protein precursor	Q9ZP08_CICAR	-	-	-	-	-	-	-	-	-	-	-
961	CATGTTCTCGGAGCTCCGGCTCCATT	FE673513.1	-	-	-	-	-	-	-	-	-	-	-	-	-	-	-	-
962	CATGAGCTCATATATGTGGTGAATCT	FE673512.1	-	-	-	-	-	-	-	-	-	-	-	-	-	-	-	-
963	CATGCTCGCTCGCGGTGGCAAAAAAA	FE673510.1	-	-	-	-	-	-	-	-	-	-	-	-	-	-	-	-
964	CATGAGTGAAAAAGAAAAGGATTCAA	FE673507.1	-	-	-	-	-	-	-	-	-	-	-	-	-	-	-	-
965	CATGGGTTAAAGAAAAATCGCCTAAA	FE673506.1	-	-	-	-	-	-	-	-	-	-	-	-	-	-	-	-
966	CATGTTAAAGGTCTTCTTAAAAGCAA	FE673505.1	-	-	-	-	-	-	-	-	-	-	-	-	-	-	-	-
967	CATGGTGTTGTAACCAGGTAACTCCA	FE673503.1	-	-	-	-	-	-	-	-	-	-	-	-	-	-	-	-
968	CATGAATGCCTAAAAGACGTGGCTTT	FE673502.1	5e-05	Medicago truncatula AKIN betagamma mRNA, complete cds	AY247268	AKIN betagamma	Q84PE0_MEDTR	AW774494	2e-05	0	0	AY247268	0	Medicago truncatula AKIN betagamma mRNA, complete cds	AKIN betagamma	Q84PE0_MEDTR	correlated ID	-
969	CATGCCACCACCAGTTCCATAAGGTG	FE673501.1	8e-07	Cicer arietinum clone CaHa16 10 kDa photosystem II polypeptide mRNA, partial cds	EF375955	10 kDa photosystem II polypeptide (Fragment)	B0L635_CICAR	CX542148	8e-05	1	0	AY348557	0	Trifolium pratense 10 kDa photosystem II polypeptide mRNA, complete cds	10 kDa photosystem II polypeptide	Q6V7X5_TRIPR	no	Correlated protein name
970	CATGTTAACAATGTGAAGTACATTGG	FE673500.1	8e-07	Arachis hypogaea isolate G1 acyl ACP-thioesterase (pFatB) mRNA, complete cds	EF117309	Acyl ACP-thioesterase	A9P5P5_ARAHY	CX534152	3e-07	0	0	EF117307	5e-162	Arachis hypogaea isolate E1 acyl ACP-thioesterase (pFatB) mRNA, complete cds	Acyl ACP-thioesterase	A9P5P3_ARAHY	no	Correlated protein name
971	CATGATGACAAAACAAAACCTCAAAA	FE673499.1	-	-	-	-	-	-	-	-	-	-	-	-	-	-	-	-
972	CATGAGCATTGAACAAAAGCATCGGT	FE673498.1	-	-	-	-	-	-	-	-	-	-	-	-	-	-	-	-
973	CATGTTTTCTTTTCCCATAACACCGC	FE673209.1	-	-	-	-	-	-	-	-	-	-	-	-	-	-	-	-
974	CATGTGATGCATAAACACTATCCACG	FE673208.1	-	-	-	-	-	-	-	-	-	-	-	-	-	-	-	-
975	CATGGTATGGAATAGAACAAGAGTAC	FE673207.1	8e-07	Lotus corniculatus var. japonicus glutamine synthetase PR2 mutant mRNA, complete cds	AY187006	Glutamine synthetase PR2 mutant; ( EC=6	Q5QKQ5_LOTJA	-	-	-	-	-	-	-	-	-	-	-
976	CATGATCACTTCACAAAAATTTATTA	FE673206.1	-	-	-	-	-	-	-	-	-	-	-	-	-	-	-	-
977	CATGGGGAAGACACGTGGAATGGGAG	FE673205.1	-	-	-	-	-	BQ149710	8e-05	1	0	AY065657	2e-78	Pisum sativum ultraviolet-B-inducible ribosomal protein mRNA, partial cds	Ultraviolet-B-inducible ribosomal protein (Fragment)	Q8VYX8_PEA	-	-
978	CATGCAATCACTGGATTTGGACAAAT	FE673204.1	-	-	-	-	-	-	-	-	-	-	-	-	-	-	-	-
979	CATGTGCCTCAACACTTTCTCCCTCT	FE673203.1	-	-	-	-	-	-	-	-	-	-	-	-	-	-	-	-
980	CATGGAATCGTACAAATCATCTTGCA	FE673200.1	-	-	-	-	-	-	-	-	-	-	-	-	-	-	-	-
982	CATGAATCTGTTGATCAATTAGTTTA	FE673198.1	-	-	-	-	-	-	-	-	-	-	-	-	-	-	-	-
983	CATGAAATATCAACCCATTAATGTTC	FE673196.1	-	-	-	-	-	-	-	-	-	-	-	-	-	-	-	-
984	CATGTTGATGCCCCTGGCCACGTCTA	FE673193.1	-	-	-	-	-	-	-	-	-	-	-	-	-	-	-	-
985	CATGAGGAGGCATAGGACATCCTCGG	FE673191.1	-	-	-	-	-	-	-	-	-	-	-	-	-	-	-	-
986	CATGTTAACCCCGCCGTCACTTTCGG	FE673189.1	8e-07	T.repens (Huia) mRNA for gamma-Tip-like protein	Z29946	Gamma-TIP-like protein (Fragment)	Q41616_TRIRP	-	-	-	-	-	-	-	-	-	-	-
987	CATGATGAAAGCACGTGAAAGAGAAA	FE673188.1	-	-	-	-	-	-	-	-	-	-	-	-	-	-	-	-
988	CATGATGTGGTTAATCGAGTTGAAGT	FE673187.1	-	-	-	-	-	-	-	-	-	-	-	-	-	-	-	-
990	CATGATCTTCTCCAACTGGGCCTTTG	FE673185.1	-	-	-	-	-	-	-	-	-	-	-	-	-	-	-	-
991	CATGGAGGAGAAGCATAAATCAGCGC	FE673184.1	-	-	-	-	-	-	-	-	-	-	-	-	-	-	-	-
992	CATGGTGGAATCTGGCCAAATATCTG	FE673182.1	-	-	-	-	-	-	-	-	-	-	-	-	-	-	-	-
994	CATGGGAGTGTACAGATGATGAACTC	FE673179.1	-	-	-	-	-	-	-	-	-	-	-	-	-	-	-	-
995	CATGCCAGGGTTCCTAATACACCAAA	FE673178.1	-	-	-	-	-	-	-	-	-	-	-	-	-	-	-	-
996	CATGTCAATGTAATNTTCTCTTACAA	FE673177.1	-	-	-	-	-	-	-	-	-	-	-	-	-	-	-	-
998	CATGTAGTGTGCACTGCTGCTTGCAC	FE673172.1	-	-	-	-	-	-	-	-	-	-	-	-	-	-	-	-
999	CATGTGGAACACCCGATCCGAAAGTG	FE673171.1	-	-	-	-	-	-	-	-	-	-	-	-	-	-	-	-
1000	CATGAATCTTTTTCTCATTGACGAAT	FE673170.1	-	-	-	-	-	-	-	-	-	-	-	-	-	-	-	-
1001	CATGACTTCGCCGGAGCTAATTCTCC	FE673169.1	-	-	-	-	-	-	-	-	-	-	-	-	-	-	-	-
1003	CATGACCAAATGTATGACCCAAGTTC	FE673167.1	-	-	-	-	-	-	-	-	-	-	-	-	-	-	-	-
1004	CATGTTGTTGGTCATCTAAGTGGCAG	FE673166.1	-	-	-	-	-	-	-	-	-	-	-	-	-	-	-	-
1006	CATGACTGTTCTTATGATTACAAAAC	FE673164.1	-	-	-	-	-	-	-	-	-	-	-	-	-	-	-	-
1007	CATGACTCCATCTCCCTCCTCATCAT	FE673162.1	-	-	-	-	-	-	-	-	-	-	-	-	-	-	-	-
1008	CATGGCACGAGAACATTCTTCATCGG	FE673161.1	-	-	-	-	-	-	-	-	-	-	-	-	-	-	-	-
1009	CATGGAGGATATACTGACCCAGTTGA	FE673160.1	-	-	-	-	-	EV255439	8e-05	0	0	L40479	4e-46	Pisum sativum (clone HW272) gene fragment	-	-	-	-
1010	CATGTACCTGCGAGCAGAACGAAAAA	FE673159.1	-	-	-	-	-	-	-	-	-	-	-	-	-	-	-	-
1011	CATGTCTGGGTACATCTTGCAGCCTC	FE673158.1	8e-07	C.arietinum mRNA for class I type 2 metallothionein (clone: CanMT-2)	X95709	Metallothionein-like protein 2; ( Short=MT-2)	MT2_CICAR	-	-	-	-	-	-	-	-	-	-	-
1012	CATGCTGAGAATGGAGTTATGAATGA	FE673156.1	-	-	-	-	-	-	-	-	-	-	-	-	-	-	-	-
1013	CATGGATGAAAGNCAAAGGGCTGTGC	FE673155.1	-	-	-	-	-	-	-	-	-	-	-	-	-	-	-	-
1014	CATGGCTTTTGCGGGCAACAAATGTG	FE673152.1	-	-	-	-	-	-	-	-	-	-	-	-	-	-	-	-
1015	CATGGCCAATCGCGCTCAACTTGAAA	FE673150.1	-	-	-	-	-	-	-	-	-	-	-	-	-	-	-	-
1016	CATGCTTTATTTGGACTCACCCGCTG	FE673149.1	-	-	-	-	-	-	-	-	-	-	-	-	-	-	-	-
1017	CATGTCTATCATATTGATGCTTGTTG	FE673147.1	8e-07	Cicer arietinum mRNA for glucan endo-beta-1,3-glucosidase, acidic isoform	AJ012751	Glucan endo-1,3-beta-d-glucosidase precursor; ( EC=3	Q9ZP12_CICAR	-	-	-	-	-	-	-	-	-	-	-
1018	CATGCTGATCTTCAATCATCAAGACA	FE673146.1	-	-	-	-	-	-	-	-	-	-	-	-	-	-	-	-
1019	CATGTCTAAAGTAATGTAATGTAGCT	FE673144.1	-	-	-	-	-	-	-	-	-	-	-	-	-	-	-	-
1020	CATGTTCTGCCCAGCAGGAAGGTAAG	FE673142.1	-	-	-	-	-	-	-	-	-	-	-	-	-	-	-	-
1022	CATGGCTGGCTACATACAAGTATAGC	FE673139.1	8e-07	Cercis chinensis NADH dehydrogenase subunit 1 (NADH1) gene, partial sequence; mitochondrial	DQ110265	-	-	-	-	-	-	-	-	-	-	-	-	-
1023	CATGTAGTAGTTCAGAATGATTGTTA	FE673138.1	-	-	-	-	-	-	-	-	-	-	-	-	-	-	-	-
1025	CATGCTCATCCGTTAATAACTGAATA	FE673136.1	-	-	-	-	-	-	-	-	-	-	-	-	-	-	-	-
1026	CATGCGTGTTGCTTCCAAACAATCTT	FE673134.1	-	-	-	-	-	-	-	-	-	-	-	-	-	-	-	-
1027	CATGTCAAAAGTCAACCATAAGGCTT	FE673131.1	-	-	-	-	-	-	-	-	-	-	-	-	-	-	-	-
1028	CATGCTAATCTGCTGAGCAAAAATAA	FE673130.1	-	-	-	-	-	-	-	-	-	-	-	-	-	-	-	-
1029	CATGGAGTGATGATGATGAGTCATCA	FE673129.1	-	-	-	-	-	-	-	-	-	-	-	-	-	-	-	-
1030	CATGTCTTACTGCGATCACAACCAAA	FE673128.1	-	-	-	-	-	-	-	-	-	-	-	-	-	-	-	-
1031	CATGGATGAAGAATTCTGCACCATTG	FE673127.1	-	-	-	-	-	BG450144	5e-06	0	0	AF002698	0	Pisum sativum putative NADPH-cytochrome P450 reductase (PSC450R1) mRNA, complete cds	Putative NADPH-cytochrome P450 reductase	O04434_PEA	-	-
1032	CATGATCTTTACTCTAGTCTTCGTTA	FE673126.1	-	-	-	-	-	-	-	-	-	-	-	-	-	-	-	-
1033	CATGATTTATTATACCTTGCCAAGAT	FE673125.1	-	-	-	-	-	-	-	-	-	-	-	-	-	-	-	-
1034	CATGATGGTTGCTGCATCTGCTAGCA	FE673124.1	-	-	-	-	-	-	-	-	-	-	-	-	-	-	-	-
1035	CATGACTCTTTCTTTTCGGTCCACAA	FE673123.1	-	-	-	-	-	-	-	-	-	-	-	-	-	-	-	-
1038	CATGGCTAATCTACCGTTCTTAAGTT	FE673117.1	8e-07	Cicer arietinum mRNA for chlorophyll a/b binding protein	AJ131044	Chlorophyll a/b binding protein precursor	Q9ZP08_CICAR	EX530347	8e-05	1	0	AF072931	0	Medicago sativa chlorophyll a/b binding protein (CARCAB1) mRNA, complete cds	Chlorophyll a/b binding protein	O81391_MEDSA	no	Correlated protein name
1039	CATGATATATCATTACAGTCAATATC	FE673116.1	-	-	-	-	-	-	-	-	-	-	-	-	-	-	-	-
1041	CATGTCCTAACTAACACTTTGAAGGA	FE671865.1	-	-	-	-	-	BQ151515	5e-06	0	0	AB236774	1e-138	Trifolium pratense RNA for putative zinc dependent protease, complete cds, clone: C1597	Putative zinc dependent protease	Q2PEX6_TRIPR	-	-
1042	CATGTGGTCTCAATCCGCCCAACCTC	FE671863.1	-	-	-	-	-	-	-	-	-	-	-	-	-	-	-	-
1043	CATGCACTTCCCTTTCCGGCGATTCA	FE671862.1	-	-	-	-	-	-	-	-	-	-	-	-	-	-	-	-
1044	CATGTCTTTAGGTTCAAAAGCGATTC	FE671860.1	-	-	-	-	-	-	-	-	-	-	-	-	-	-	-	-
1045	CATGAGTGACCCGAGTGGAAATTACG	FE671859.1	-	-	-	-	-	-	-	-	-	-	-	-	-	-	-	-
1046	CATGGGTGTCAAAGGTTTTGTTGAAG	FE671857.1	-	-	-	-	-	CX529498	3e-07	0	0	AB236842	5e-45	Trifolium pratense RNA for putative mitochondrial dicarboxylate carrier protein, complete cds, clone: C331	Putative mitochondrial dicarboxylate carrier protein	Q2PEQ8_TRIPR	-	-
1047	CATGGAATCTTTGGGTTAACGCTGGC	FE671855.1	8e-07	Cicer arietinum L. mRNA for thaumatin-like protein PR-5b, partial	AJ010501	Thaumatin-like protein PR-5b precursor (Fragment)	O81926_CICAR	-	-	-	-	-	-	-	-	-	-	-
1048	CATGAGAACTGCCATTTCTTCCATCA	FE671854.1	-	-	-	-	-	-	-	-	-	-	-	-	-	-	-	-
1050	CATGGTCAATATTCTGATCTTCTAAG	FE671852.1	8e-07	Vicia faba VfPP1c-4 mRNA for catalytic subunit of protein phosphatase 1, complete cds	AB254852	Serine/threonine protein phosphatase; ( EC=3	Q0EAF2_VICFA	BF644539	3e-07	0	0	AJ002485	0	Medicago sativa mRNA for protein phosphatase 1, beta subunit	Serine/threonine protein phosphatase; ( EC=3.1.3.16)	O65844_MEDSA	no	Correlated protein name
1051	CATGGAAAGCAATGGAAGCACTGTAT	FE671851.1	-	-	-	-	-	-	-	-	-	-	-	-	-	-	-	-
1052	CATGAGGCTAGTGAAGGGTTTGGTTT	FE671849.1	-	-	-	-	-	-	-	-	-	-	-	-	-	-	-	-
1053	CATGTTATACAATCAAATATCCTTAC	FE671848.1	-	-	-	-	-	-	-	-	-	-	-	-	-	-	-	-
1054	CATGCTCGTAAAACTGAAGAACGTGA	FE671846.1	-	-	-	-	-	-	-	-	-	-	-	-	-	-	-	-
1055	CATGATATGATTATTTTGGCTGGTGC	FE671845.1	-	-	-	-	-	-	-	-	-	-	-	-	-	-	-	-
1056	CATGAAGTGTAGTTTCCTCACACTGC	FE671844.1	-	-	-	-	-	CX536993	5e-06	0	0	AF169022	7e-37	Glycine max seed maturation protein PM37 (PM37) mRNA, complete cds	Seed maturation protein PM37	Q9SWB5_SOYBN	-	-
1057	CATGAAGTTCTTGTCAAGGGCTACAA	FE671843.1	-	-	-	-	-	-	-	-	-	-	-	-	-	-	-	-
1058	CATGTGACCCTTGCAACTGCAAGTGA	FE671841.1	8e-07	C.arietinum mRNA for metallothionein (clone: CanMT-1)	X95708	Metallothionein-like protein 1; ( Short=MT-1)	MT1_CICAR	EV260875	8e-05	1	0	AF189766	2e-118	Medicago sativa type 1 metallothionein (MET1) mRNA, complete cds	Type 1 metallothionein	Q9SP23_MEDSA	no	Correlated protein name
1059	CATGTGGGCAGTCCCTATTGCAATAT	FE671839.1	-	-	-	-	-	-	-	-	-	-	-	-	-	-	-	-
1060	CATGACAACAACAATAGCAACGATAA	FE671838.1	-	-	-	-	-	-	-	-	-	-	-	-	-	-	-	-
1061	CATGTCTGCATCTGCAGCAATCATTG	FE671836.1	-	-	-	-	-	-	-	-	-	-	-	-	-	-	-	-
1062	CATGTTTCTCCTGAATTTCAAGCAGG	FE671835.1	-	-	-	-	-	-	-	-	-	-	-	-	-	-	-	-
1063	CATGGAGGGTTTTCTTCTGTTCAGTT	FE671833.1	-	-	-	-	-	-	-	-	-	-	-	-	-	-	-	-
1064	CATGTTTGGAAGTTTGATTGACTTTT	FE671832.1	-	-	-	-	-	-	-	-	-	-	-	-	-	-	-	-
1065	CATGGATTGTTTTCAAAAGCTAATCA	FE671830.1	-	-	-	-	-	-	-	-	-	-	-	-	-	-	-	-
1066	CATGTCCACCGTGCCCACCATTTCCG	FE671829.1	8e-07	Cicer arietinum mRNA for glycine-rich protein 1	AJ007556	Glycine-rich protein 1 (Fragment)	O81929_CICAR	-	-	-	-	-	-	-	-	-	-	-
1067	CATGGATCATATGCATTCCAGTGGAA	FE671826.1	-	-	-	-	-	-	-	-	-	-	-	-	-	-	-	-
1068	CATGGGAAGGCCAAGATTGCTTATCA	FE671825.1	-	-	-	-	-	-	-	-	-	-	-	-	-	-	-	-
1069	CATGACATCTCTGGACCATACCAAAA	FE671824.1	-	-	-	-	-	-	-	-	-	-	-	-	-	-	-	-
1070	CATGGGTAGTTGTGGATGGAGAACAC	FE671821.1	-	-	-	-	-	-	-	-	-	-	-	-	-	-	-	-
1071	CATGAAGGTCGGAGAAGTTGCAAAAA	FE671818.1	-	-	-	-	-	-	-	-	-	-	-	-	-	-	-	-
1073	CATGGTGGCAATATCTGTTCTGATCC	FE671816.1	-	-	-	-	-	-	-	-	-	-	-	-	-	-	-	-
1074	CATGAGTCTCCGTCGCGGTCGCGGTT	FE671815.1	-	-	-	-	-	-	-	-	-	-	-	-	-	-	-	-
1075	CATGTGTTGAGATAGCTAAGGAAATG	FE671814.1	-	-	-	-	-	-	-	-	-	-	-	-	-	-	-	-
1076	CATGAAAAAAAATGCTTAAAACTCCC	FE671812.1	-	-	-	-	-	-	-	-	-	-	-	-	-	-	-	-
1078	CATGGCCTCTCCAACACTCATAACTC	FE671810.1	-	-	-	-	-	-	-	-	-	-	-	-	-	-	-	-
1079	CATGTGACCCGGAGTTGGTGAACCTA	FE671809.1	-	-	-	-	-	-	-	-	-	-	-	-	-	-	-	-
1080	CATGATGAGTGTTAAAAATAATACAC	FE671808.1	-	-	-	-	-	-	-	-	-	-	-	-	-	-	-	-
1082	CATGTGATGTGAACTTGTGTATGTAT	FE671806.1	-	-	-	-	-	-	-	-	-	-	-	-	-	-	-	-
1083	CATGGAGTATGTGAAGTCTGGGGAGC	FE671804.1	-	-	-	-	-	-	-	-	-	-	-	-	-	-	-	-
1085	CATGATTGAATATATCTTCCACATTA	FE671802.1	-	-	-	-	-	-	-	-	-	-	-	-	-	-	-	-
1086	CATGGCTCCTGGTCCCGTTATTGATG	FE671801.1	-	-	-	-	-	-	-	-	-	-	-	-	-	-	-	-
1087	CATGTCATAATAAAAGACTACTATCA	FE671800.1	-	-	-	-	-	-	-	-	-	-	-	-	-	-	-	-
1088	CATGATGAGCATATTAAACCTATGAA	FE671798.1	-	-	-	-	-	-	-	-	-	-	-	-	-	-	-	-
1090	CATGTCATCTCCAGGCCACATAGAGT	FE671795.1	-	-	-	-	-	-	-	-	-	-	-	-	-	-	-	-
1091	CATGTTGCAGGAGGGAGAAATCACAG	FE671794.1	-	-	-	-	-	-	-	-	-	-	-	-	-	-	-	-
1092	CATGTTACAAGAAAATGAGCAAATGG	FE671792.1	-	-	-	-	-	-	-	-	-	-	-	-	-	-	-	-
1094	CATGACATTCCCAACAAAACTCCCAA	FE671789.1	-	-	-	-	-	-	-	-	-	-	-	-	-	-	-	-
1095	CATGAAAATGCTCCTTTTTCTGTGAC	FE671788.1	-	-	-	-	-	-	-	-	-	-	-	-	-	-	-	-
1096	CATGACTAGGAGAGATTGAAGTTGGT	FE671786.1	-	-	-	-	-	-	-	-	-	-	-	-	-	-	-	-
1097	CATGGGTTATTCTTTGCCCAATTCCA	FE671785.1	-	-	-	-	-	-	-	-	-	-	-	-	-	-	-	-
1098	CATGGAAATGAGTATAAATAGTAATC	FE671784.1	-	-	-	-	-	-	-	-	-	-	-	-	-	-	-	-
1099	CATGCCCTTTCAAGCTGTCCAAAGAC	FE671783.1	8e-07	Pisum sativum short-chain dehydrogenase Tic32 mRNA, complete cds; nuclear gene for chloroplast product	AY488758	Short-chain dehydrogenase Tic32	Q6RVV4_PEA	DW016401	8e-05	1	0	AY488758	0	Pisum sativum short-chain dehydrogenase Tic32 mRNA, complete cds; nuclear gene for chloroplast product	Short-chain dehydrogenase Tic32	Q6RVV4_PEA	correlated ID	-
1100	CATGTTGACTCGACATCACATCCCAA	FE671782.1	-	-	-	-	-	-	-	-	-	-	-	-	-	-	-	-
1101	CATGAAGATTCGATTCTCGGAAGATT	FE671781.1	-	-	-	-	-	-	-	-	-	-	-	-	-	-	-	-
1102	CATGTAGGGGAGTTTGCGGAGAGCGT	FE671780.1	-	-	-	-	-	-	-	-	-	-	-	-	-	-	-	-
1103	CATGAAGAGTCTCTGAAAGCTTCCAC	FE671779.1	-	-	-	-	-	-	-	-	-	-	-	-	-	-	-	-
1105	CATGGATTCTCAAACCCAAAAACTCC	FE671774.1	-	-	-	-	-	-	-	-	-	-	-	-	-	-	-	-
1107	CATGCATACCAGTTGCTGGTGAAAGG	FE672633.1	-	-	-	-	-	-	-	-	-	-	-	-	-	-	-	-
1108	CATGTAGAAGATGCAGGCCTAATTCC	FE672632.1	-	-	-	-	-	-	-	-	-	-	-	-	-	-	-	-
1109	CATGCTAGCGTCTTTGTTGGTGGCTT	FE672631.1	-	-	-	-	-	EY475552	5e-06	0	0	M55147	2e-32	Pea chloroplast glyceraldehyde-3-phosphate dehydrogenase (Gpb1) gene, complete cds	Glyceraldehyde-3-phosphate dehydrogenase B, chloroplastic precursor; ( EC=1.2.1.13; AltName	G3PB_PEA	-	-
1111	CATGGAGGACGAAAATTATTCAAAGG	FE672627.1	-	-	-	-	-	-	-	-	-	-	-	-	-	-	-	-
1112	CATGGCAACAAAAACAAAAATCTTGT	FE672626.1	-	-	-	-	-	-	-	-	-	-	-	-	-	-	-	-
1113	CATGACAATTCCAAGTTTTAAAACAT	FE672625.1	-	-	-	-	-	-	-	-	-	-	-	-	-	-	-	-
1114	CATGTTATTGCTGATTCTGCCATTGG	FE672624.1	8e-07	Cicer arietinum mRNA for lipid transfer protein	AJ002958	Non-specific lipid-transfer protein precursor; ( Short=LTP)	NLTP_CICAR	-	-	-	-	-	-	-	-	-	-	-
1116	CATGCCAATTATCCACTCTTTACTCA	FE672621.1	-	-	-	-	-	-	-	-	-	-	-	-	-	-	-	-
1117	CATGTACTACGATGCTGGTGCACGTC	FE672619.1	-	-	-	-	-	-	-	-	-	-	-	-	-	-	-	-
1118	CATGAAAAGGATCTCGAACTTCATTT	FE672618.1	8e-07	Cicer arietinum mRNA for lectin-like protein	AJ271666	Lectin-like protein	Q9M444_CICAR	-	-	-	-	-	-	-	-	-	-	-
1119	CATGCGTCGTAGAGGAAAAAAACCAA	FE672617.1	-	-	-	-	-	-	-	-	-	-	-	-	-	-	-	-
1120	CATGTCTACAAGAACTCACAACAACC	FE672614.1	-	-	-	-	-	DW016154	8e-05	1	0	AB030493	5e-89	Glycine max SC-03 mRNA for thiamin biosynthetic enzyme, complete cds	Thiamin biosynthetic enzyme	Q9SLR7_SOYBN	-	-
1122	CATGGCCCATTCCATTTATAGCACGG	FE672611.1	-	-	-	-	-	-	-	-	-	-	-	-	-	-	-	-
1123	CATGATAATCCTCTCAGCTCTTGAAA	FE672610.1	8e-07	Pisum sativum mRNA for precursor for 33-kDa protein of photosystem II, complete cds	D13297	Oxygen-evolving enhancer protein 1, chloroplastic precursor; ( Short=OEE1; AltName: Full=33 kDa subunit of oxygen evolving system of photosystem II; AltName: Full=OEC 33 kDa subunit; AltName: Full=33 kDa thylakoid membrane protein)	PSBO_PEA	-	-	-	-	-	-	-	-	-	-	-
1124	CATGGAGCATCTAATTCGTGTTATCG	FE672608.1	-	-	-	-	-	-	-	-	-	-	-	-	-	-	-	-
1127	CATGCTAATTGTTTCCAAAATATCTT	FE672605.1	-	-	-	-	-	-	-	-	-	-	-	-	-	-	-	-
1128	CATGCATTCTTACCAGGGCTCCATTG	FE672602.1	-	-	-	-	-	-	-	-	-	-	-	-	-	-	-	-
1129	CATGCGCTCAGCAACAGTTCACTATT	FE672601.1	-	-	-	-	-	-	-	-	-	-	-	-	-	-	-	-
1130	CATGGAGATAATTCAAAATCCCACGC	FE672599.1	-	-	-	-	-	-	-	-	-	-	-	-	-	-	-	-
1131	CATGGGGATTGGACATCCCCGCCGGA	FE672597.1	8e-07	Cicer arietinum L. mRNA for thaumatin-like protein PR-5a	AJ010502	Thaumatin-like protein PR-5a precursor	O81927_CICAR	-	-	-	-	-	-	-	-	-	-	-
1134	CATGGCAGACGATTCCATCGTCGCAG	FE672592.1	-	-	-	-	-	-	-	-	-	-	-	-	-	-	-	-
1135	CATGACTCACTTCGATAATCACCAAC	FE672589.1	-	-	-	-	-	-	-	-	-	-	-	-	-	-	-	-
1138	CATGGAGTTGATCNAACCACAACAGA	FE672584.1	5e-05	Cicer pinnatifidum dehydrin 1 mRNA, complete cds	AY170010	Dehydrin 1	Q8GUS4_9FABA	-	-	-	-	-	-	-	-	-	-	-
1139	CATGAGCGTCATCTCTACCAGAACTA	FE672583.1	-	-	-	-	-	-	-	-	-	-	-	-	-	-	-	-
1141	CATGACCAAAGCCGCTACGAAAACGA	FE672581.1	-	-	-	-	-	-	-	-	-	-	-	-	-	-	-	-
1142	CATGTACATTTCATTTAAACGCCGTG	FE672579.1	-	-	-	-	-	-	-	-	-	-	-	-	-	-	-	-
1144	CATGCGAATGTATCCAGAGCGTAGGC	FE672574.1	-	-	-	-	-	CB892187	8e-05	1	0	AJ577394	0	Cicer arietinum 18S rRNA gene, 5.8S rRNA gene, IGS, ITS1 and ITS2, clone CanrDNA	-	-	-	-
1145	CATGCTCGAAGGAAAGATGTATCGTC	FE672572.1	-	-	-	-	-	-	-	-	-	-	-	-	-	-	-	-
1146	CATGTCGAATGAGGCCGAAAACTTCT	FE672571.1	-	-	-	-	-	-	-	-	-	-	-	-	-	-	-	-
1147	CATGCCAGACCTTCCGCTACTTCTTC	FE672567.1	-	-	-	-	-	AJ504200	8e-05	1	0	DQ889528	7e-12	Arachis hypogaea clone 1Y88 universal stress protein mRNA, complete cds	-	-	-	-
1148	CATGTGTGAGGGTATTCTCGAGCTCC	FE672566.1	-	-	-	-	-	-	-	-	-	-	-	-	-	-	-	-
1149	CATGTGATGACCAACCTTGGTGAGAA	FE672564.1	8e-07	Cicer arietinum calmodulin (CaM1) mRNA, complete cds	EF413914	Calmodulin	A3RI65_CICAR	DW017343	8e-05	1	0	AF494219	0	Medicago truncatula calmodulin 1 mRNA, complete cds	Calmodulin 1	Q71JC6_MEDTR	no	Correlated protein name
1150	CATGTTGCACGACAAGACCTGAGAAA	FE672560.1	-	-	-	-	-	-	-	-	-	-	-	-	-	-	-	-
1151	CATGAGTGATGTTTTGTTAGGATATA	FE672559.1	-	-	-	-	-	-	-	-	-	-	-	-	-	-	-	-
1152	CATGGCTAATCTACCGTTCTTAAGTA	FE672558.1	3e-06	Cicer arietinum mRNA for chlorophyll a/b binding protein	AJ131044	Chlorophyll a/b binding protein precursor	Q9ZP08_CICAR	-	-	-	-	-	-	-	-	-	-	-
1153	CATGGTAATTTAGTTGCTATGGATAT	FE672556.1	-	-	-	-	-	-	-	-	-	-	-	-	-	-	-	-
1154	CATGATTGCTTTTTAGTGATTAGCTT	FE672555.1	-	-	-	-	-	-	-	-	-	-	-	-	-	-	-	-
1155	CATGGTTAGCTCACAGCTGCAACTAC	FE672554.1	-	-	-	-	-	-	-	-	-	-	-	-	-	-	-	-
1156	CATGATGAACAACCCTCTTGTGCAAT	FE672553.1	-	-	-	-	-	-	-	-	-	-	-	-	-	-	-	-
1157	CATGTGCTCAAGAAGAAGAAAAATAT	FE672551.1	-	-	-	-	-	-	-	-	-	-	-	-	-	-	-	-
1158	CATGGCAGTAGAACTGATGACAACAG	FE672548.1	-	-	-	-	-	-	-	-	-	-	-	-	-	-	-	-
1159	CATGGAAGTCCTCTCATACCTCACAC	FE672544.1	-	-	-	-	-	-	-	-	-	-	-	-	-	-	-	-
1160	CATGCTTTCGGCGACTATGACTATGG	FE672542.1	-	-	-	-	-	-	-	-	-	-	-	-	-	-	-	-
1161	CATGTGTCGCGGCGGAAGAATGTTCG	FE672541.1	-	-	-	-	-	-	-	-	-	-	-	-	-	-	-	-
1162	CATGAGCAAAATAGAAATGATTTTTT	FE672540.1	-	-	-	-	-	-	-	-	-	-	-	-	-	-	-	-
1163	CATGATTACACAAGCTTTAGAGTTGA	FE672539.1	-	-	-	-	-	-	-	-	-	-	-	-	-	-	-	-
1164	CATGTAGAAGTCGGACTCGGGAACCA	FE672538.1	-	-	-	-	-	BG453778	8e-05	1	0	L09547	0	Pisum sativum (clone pCLp) nuclear encoded precursor to chloroplast protein mRNA, complete cds	ATP-dependent Clp protease ATP-binding subunit clpC homolog, chloroplastic precursor	CLPC_PEA	-	-
1165	CATGACTCTGATCAACGAACCGAACC	FE671481.1	-	-	-	-	-	-	-	-	-	-	-	-	-	-	-	-
1166	CATGATGAGGACCTATATGATTTAAA	FE671480.1	-	-	-	-	-	-	-	-	-	-	-	-	-	-	-	-
1167	CATGATTCCTTCACTGTCTATCCTTG	FE671479.1	-	-	-	-	-	-	-	-	-	-	-	-	-	-	-	-
1168	CATGCAGTGCCTTCAAGTTAATCCTG	FE671478.1	-	-	-	-	-	-	-	-	-	-	-	-	-	-	-	-
1171	CATGATGGCAAAATTTGTGGTGATGA	FE671475.1	-	-	-	-	-	-	-	-	-	-	-	-	-	-	-	-
1172	CATGAAGAATGCACCAGTTTCAATTG	FE671474.1	-	-	-	-	-	-	-	-	-	-	-	-	-	-	-	-
1174	CATGACCGCCTAGTTCGTAACCTGTG	FE671472.1	-	-	-	-	-	-	-	-	-	-	-	-	-	-	-	-
1175	CATGCTGCTGCTATAAAGCTTTATAT	FE671471.1	-	-	-	-	-	-	-	-	-	-	-	-	-	-	-	-
1176	CATGGTTACTGGTGCAGCTTCAGCCG	FE671470.1	-	-	-	-	-	-	-	-	-	-	-	-	-	-	-	-
1177	CATGTTTGGGTGTATGCTTGTGTTTG	FE671096.1	-	-	-	-	-	-	-	-	-	-	-	-	-	-	-	-
1178	CATGTGACCCGGAGTAGGTGAAGCTA	FE671095.1	-	-	-	-	-	-	-	-	-	-	-	-	-	-	-	-
1179	CATGTATCCATCTTATTAATAAACCA	FE671094.1	-	-	-	-	-	-	-	-	-	-	-	-	-	-	-	-
1180	CATGGATATATTTGATGTGGATCATT	FE671093.1	-	-	-	-	-	BG453595	2e-05	0	0	U81288	0	Pisum sativum PsRT17-1 mRNA, complete cds	PsRT17-1	P93487_PEA	-	-
1181	CATGGGAACATCAGCCCCAGCAATTC	FE671091.1	-	-	-	-	-	CA922178	8e-05	1	0	U56697	0	Pisum sativum pyruvate dehydrogenase E1beta mRNA, nuclear gene encoding mitochondrial protein, complete cds	Pyruvate dehydrogenase E1 component subunit beta, mitochondrial precursor; ( Short=PDHE1-B; EC=1.2.4.1)	ODPB_PEA	-	-
1182	CATGATCTTCTCCAACGGGGCCTTTG	FE671090.1	-	-	-	-	-	-	-	-	-	-	-	-	-	-	-	-
1184	CATGAGACCCTGGTGATAACAGTAAA	FE671087.1	-	-	-	-	-	-	-	-	-	-	-	-	-	-	-	-
1185	CATGATTGAGTTTTTCCTCATACAAC	FE671086.1	-	-	-	-	-	-	-	-	-	-	-	-	-	-	-	-
1186	CATGTAATTTGCAGCCCATAAACTTG	FE671469.1	-	-	-	-	-	DY618093	3e-07	0	0	Z73938	0	L.japonicus mRNA for small GTP-binding protein, RAB5A	RAB5A	Q40209_LOTJA	-	-
1188	CATGCAATTCTTATCTATCTTGCTTC	FE671466.1	-	-	-	-	-	BI266181	3e-07	0	0	AF243378	2e-149	Glycine max glutathione S-transferase GST 23 mRNA, complete cds	Glutathione S-transferase GST 23; ( EC=2.5.1.18)	Q9FQD5_SOYBN	-	-
1189	CATGGTTTTGTTGCGAAGCCAGAGAC	FE671465.1	-	-	-	-	-	EV256717	8e-05	1	0	X54701	1e-51	L.polyphyllus pPLB07 mRNA	-	-	-	-
1191	CATGCTTGCCATTGATTCTAAGTGAA	FE671461.1	8e-07	Cicer arietinum mRNA for lipid transfer protein	AJ002958	Non-specific lipid-transfer protein precursor; ( Short=LTP)	NLTP_CICAR	-	-	-	-	-	-	-	-	-	-	-
1192	CATGAAGATACCACCATATAGCAATG	FE671460.1	-	-	-	-	-	AL386990	8e-05	1	0	AJ243392	2e-46	Pisum sativum mRNA for cytosolic fructose-1,6-bisphosphatase	Fructose-1,6-bisphosphatase; ( EC=3.1.3.11)	Q9XGG5_PEA	-	-
1193	CATGTTTTTGATATACAACACATAAT	FE671459.1	-	-	-	-	-	-	-	-	-	-	-	-	-	-	-	-
1194	CATGCAATAGAGTTGCCACACATCGA	FE671458.1	-	-	-	-	-	CA920882	8e-05	1	0	AB333797	0	Glycine max mRNA for peroxisomal 3-ketoacyl-CoA thiolase precursor, complete cds	Peroxisomal 3-ketoacyl-CoA thiolase	B0M1A9_SOYBN	-	-
1195	CATGGAATTATCCTCTGTTAATGGCG	FE671085.1	1e-05	Ammopiptanthus mongolicus betaine aldehyde dehydrogenase mRNA, partial cds	DQ288723	Betaine aldehyde dehydrogenase (Fragment)	Q2I693_9FABA	-	-	-	-	-	-	-	-	-	-	-
1196	CATGTTTATCAGAGTAGCGGTGCATC	FE671083.1	-	-	-	-	-	-	-	-	-	-	-	-	-	-	-	-
1198	CATGTCCATTCTCCACCTATTGAAGC	FE671081.1	-	-	-	-	-	-	-	-	-	-	-	-	-	-	-	-
1200	CATGACCCAAACCCTTTCTCCCATCT	FE671079.1	-	-	-	-	-	-	-	-	-	-	-	-	-	-	-	-
1201	CATGTGCATATCCACCTTGTGCATAG	FE671077.1	-	-	-	-	-	-	-	-	-	-	-	-	-	-	-	-
1203	CATGGAGAAGGTTTCCGCCAACGCTG	FE671075.1	-	-	-	-	-	-	-	-	-	-	-	-	-	-	-	-
1204	CATGTTTTTGACAAACCACTCCCCAA	FE671074.1	-	-	-	-	-	-	-	-	-	-	-	-	-	-	-	-
1205	CATGAATTTGTAAAGTATGGATTGGC	FE671457.1	-	-	-	-	-	-	-	-	-	-	-	-	-	-	-	-
1206	CATGTTGCTCTCCTTTGTGCTCTCCA	FE671456.1	-	-	-	-	-	EV261452	8e-05	0	0	EU139869	3e-157	Medicago truncatula cultivar Jemalong cold-acclimation specific protein 15 gene, promoter regions and complete cds	Cold-acclimation specific protein 15	B1NY79_MEDTR	-	-
1207	CATGAACCAGAACAAGCCTGAAAGCA	FE671455.1	-	-	-	-	-	-	-	-	-	-	-	-	-	-	-	-
1209	CATGAACAGCCGACTCAACCAGTAAT	FE671452.1	-	-	-	-	-	-	-	-	-	-	-	-	-	-	-	-
1211	CATGGTGTTGTCACTGAAGAGTGTGA	FE671450.1	8e-07	Pisum sativum partial mRNA for putative cathepsin B-like protease (cat1 gene) clone PsCat1	AJ251536	Putative cathepsin B-like protease (Fragment)	Q9SC35_PEA	EX531792	3e-07	0	0	AJ251536	4e-172	Pisum sativum partial mRNA for putative cathepsin B-like protease (cat1 gene) clone PsCat1	Putative cathepsin B-like protease (Fragment)	Q9SC35_PEA	correlated ID	-
1213	CATGTGATCCATATACACGCACTAAT	FE671072.1	-	-	-	-	-	-	-	-	-	-	-	-	-	-	-	-
1214	CATGTTTTTGAATGGTTTCTGCAAGA	FE671071.1	-	-	-	-	-	-	-	-	-	-	-	-	-	-	-	-
1215	CATGAGGTTATTGACAAGCTTCATAA	FE671070.1	-	-	-	-	-	-	-	-	-	-	-	-	-	-	-	-
1216	CATGCTGTACAGTGTAAAGTTTTAAA	FE671067.1	-	-	-	-	-	-	-	-	-	-	-	-	-	-	-	-
1217	CATGGTGCAACTTTTTACAAGATGGG	FE671066.1	-	-	-	-	-	-	-	-	-	-	-	-	-	-	-	-
1219	CATGACAAAGTTTCACTTGTATGGAT	FE671063.1	-	-	-	-	-	-	-	-	-	-	-	-	-	-	-	-
1220	CATGGAATATCTTCCAGCTCTTGGCA	FE671062.1	-	-	-	-	-	-	-	-	-	-	-	-	-	-	-	-
1221	CATGAGTATTAAACAAGAATAATAAT	FE671445.1	-	-	-	-	-	-	-	-	-	-	-	-	-	-	-	-
1222	CATGTTCTCCTTTCTCAGCCTCTCGT	FE671444.1	-	-	-	-	-	-	-	-	-	-	-	-	-	-	-	-
1225	CATGGCCTCCCAAGCAAGCCTCCTCC	FE671440.1	-	-	-	-	-	EV258610	3e-07	0	0	DQ887086	1e-132	Arachis hypogaea ubiquitin-conjugating enzyme mRNA, complete cds	Ubiquitin carrier protein; ( EC=6.3.2.-)	Q06H22_ARAHY	-	-
1227	CATGGCTCACCAGTCGTTCAGATGGC	FE671437.1	-	-	-	-	-	-	-	-	-	-	-	-	-	-	-	-
1228	CATGTCAAATTTTGCAAACAGGGATA	FE671436.1	-	-	-	-	-	EY475365	8e-05	1	0	DQ122825	4e-46	Medicago sativa clone M9 syntaxin of plants mRNA, partial cds	Syntaxin of plants (Fragment)	Q45NJ2_MEDSA	-	-
1229	CATGAATCCTACCAAGGCTATTTCAA	FE671435.1	-	-	-	-	-	-	-	-	-	-	-	-	-	-	-	-
1230	CATGGATTCCACGTGTCTTGTATCGA	FE671059.1	-	-	-	-	-	-	-	-	-	-	-	-	-	-	-	-
1231	CATGCTCGCTCGCGGTGGCAAAGAAA	FE671058.1	-	-	-	-	-	-	-	-	-	-	-	-	-	-	-	-
1232	CATGATGATGAGCCTCCTCAGCCTAT	FE671057.1	-	-	-	-	-	-	-	-	-	-	-	-	-	-	-	-
1233	CATGCTTTGGAATGCTGTGATCTTTG	FE671056.1	-	-	-	-	-	CX542009	8e-05	1	0	L06967	1e-91	Medicago sativa ubiquitin carrier protein mRNA, complete cds	Ubiquitin-conjugating enzyme E2 2; ( EC=6.3.2.19; AltName	UBC2_MEDSA	-	-
1234	CATGAGCAAATTCGATATCAAATATT	FE671055.1	-	-	-	-	-	-	-	-	-	-	-	-	-	-	-	-
1235	CATGCCTAATTCTCCGAAAAATTTTA	FE671054.1	-	-	-	-	-	-	-	-	-	-	-	-	-	-	-	-
1236	CATGGGTCGATGGCGATGTTGTTGGA	FE671053.1	-	-	-	-	-	-	-	-	-	-	-	-	-	-	-	-
1237	CATGCTTTTACAAGAGGGGGACATTG	FE671052.1	-	-	-	-	-	-	-	-	-	-	-	-	-	-	-	-
1238	CATGCACAGGGCTGTGGCTGGCTTTA	FE671051.1	-	-	-	-	-	-	-	-	-	-	-	-	-	-	-	-
1239	CATGCCACTAGTATTATCAATCCCAG	FE671050.1	-	-	-	-	-	-	-	-	-	-	-	-	-	-	-	-
1241	CATGAAGTTGGGGATCACACGATGGA	FE671431.1	8e-07	Cicer arietinum partial mRNA for cyclophilin-type peptidyl-prolyl cis-trans isomerase (ppi gene)	AJ609278	Cyclophilin-type peptidyl-prolyl cis-trans isomerase (Fragment); ( EC=5	Q708X2_CICAR	-	-	-	-	-	-	-	-	-	-	-
1242	CATGATTCTTCGTCCGTTTTCTGTCA	FE671430.1	-	-	-	-	-	-	-	-	-	-	-	-	-	-	-	-
1243	CATGGGGTCCAGCTTGTTCACGGCCG	FE671428.1	-	-	-	-	-	-	-	-	-	-	-	-	-	-	-	-
1244	CATGCTTTATCAGACAAGAAGGTTGG	FE671426.1	-	-	-	-	-	-	-	-	-	-	-	-	-	-	-	-
1246	CATGGACCTACAAAGATATCTATTGT	FE671423.1	-	-	-	-	-	-	-	-	-	-	-	-	-	-	-	-
1247	CATGGAAAGAAGAAACACCATTTCTT	FE671422.1	-	-	-	-	-	CX522142	3e-07	0	0	AY382827	1e-41	Glycine max abscisic stress ripening-like protein mRNA, complete cds	Abscisic stress ripening-like protein	Q2TUW1_SOYBN	-	-
1248	CATGTATAATCAATACAGGTTCTTCT	FE671049.1	-	-	-	-	-	-	-	-	-	-	-	-	-	-	-	-
1249	CATGAATCAAAAATCAAAATGTCAAA	FE671048.1	-	-	-	-	-	-	-	-	-	-	-	-	-	-	-	-
1250	CATGAATTGCATAAGCTTGAACCAAC	FE671047.1	-	-	-	-	-	-	-	-	-	-	-	-	-	-	-	-
1251	CATGTGTAAACGGAACGTCGCCGTTT	FE671046.1	-	-	-	-	-	-	-	-	-	-	-	-	-	-	-	-
1252	CATGGTCTTTTAAGCCTAAGGGGGAA	FE671045.1	5e-05	Trifolium repens auxin response factor mRNA, partial cds	AY646093	Auxin response factor (Fragment)	Q6DTY6_TRIRP	AW696301	3e-07	0	0	AY646093	2e-90	Trifolium repens auxin response factor mRNA, partial cds	Auxin response factor (Fragment)	Q6DTY6_TRIRP	correlated ID	-
1253	CATGATGCGATCGAAGGTTTCAACGG	FE671044.1	-	-	-	-	-	-	-	-	-	-	-	-	-	-	-	-
1254	CATGTGCGGACAAAAACCATCGCGTC	FE671043.1	-	-	-	-	-	-	-	-	-	-	-	-	-	-	-	-
1255	CATGTGTATATTTAAGCTTTGACTCT	FE671039.1	-	-	-	-	-	AW774430	8e-05	1	0	AF118784	8e-167	Glycine max ribonucleotide reductase large subunit A mRNA, complete cds	Ribonucleoside-diphosphate reductase; ( EC=1.17.4.1)	Q8GZU9_SOYBN	-	-
1256	CATGAAGAATAAGTGCCAAATCCTTG	FE671421.1	8e-07	Pisum sativum NADP-dependent isocitrate dehydrogenase I gene, complete cds	AY730588	NADP-dependent isocitrate dehydrogenase (NADP-dependent isocitrate dehydrogenase I); ( EC=1	Q6R6M7_PEA	CB065432	3e-07	0	0	M93672	0	Medicago sativa isocitrate dehydrogenase mRNA, 3' end cds	Isocitrate dehydrogenase [NADP], chloroplastic precursor (Fragment); ( Short=IDH; EC=1.1.1.42; AltName	IDHP_MEDSA	no	Correlated protein name
1257	CATGAGCATCAACTTTTTTGAAGTCA	FE671419.1	-	-	-	-	-	EV256447	3e-07	0	0	AJ831475	0	Pisum sativum mRNA for putative His-Asp phosphotransfer protein (hpt gene)	Putative His-Asp phosphotransfer protein	Q659S8_PEA	-	-
1258	CATGATATTTAAAAGCATATTATACC	FE671418.1	-	-	-	-	-	-	-	-	-	-	-	-	-	-	-	-
1260	CATGCGTCACAATGGAAATTACAATC	FE671415.1	-	-	-	-	-	-	-	-	-	-	-	-	-	-	-	-
1262	CATGATACTACGGGTTACTCTCGTTA	FE671413.1	-	-	-	-	-	-	-	-	-	-	-	-	-	-	-	-
1263	CATGATTATGTATACTTGTATATTAT	FE671412.1	-	-	-	-	-	-	-	-	-	-	-	-	-	-	-	-
1264	CATGGCACTCTAATACGCTGATATAA	FE671411.1	-	-	-	-	-	-	-	-	-	-	-	-	-	-	-	-
1265	CATGTTAAAGGAAGGGAATCTTGTGA	FE671037.1	-	-	-	-	-	-	-	-	-	-	-	-	-	-	-	-
1267	CATGTTAGGTTCAATATCAAACCCCA	FE671035.1	-	-	-	-	-	-	-	-	-	-	-	-	-	-	-	-
1268	CATGAAGGAGTCAAATCAGTCTTTTA	FE671034.1	-	-	-	-	-	EX532346	3e-07	0	0	AF372517	0	Medicago sativa 16S ribosomal RNA gene, partial sequence; and tRNA-Ile and tRNA-Ala genes, complete sequence; chloroplast genes for chloroplast products	-	-	-	-
1269	CATGTGTGGGCAACCTTGGACCACGC	FE671033.1	-	-	-	-	-	-	-	-	-	-	-	-	-	-	-	-
1270	CATGATAATAACCCTCCTCTCTCCCA	FE671031.1	-	-	-	-	-	-	-	-	-	-	-	-	-	-	-	-
1271	CATGCTATGTCACTGTTAGAGGTGAC	FE671030.1	1e-05	Cicer arietinum mRNA for ribosomal protein RL5 (rl5 gene)	AJ515029	Ribosomal protein RL5	Q8GTE2_CICAR	-	-	-	-	-	-	-	-	-	-	-
1272	CATGAAGCAACGGTCGTCAATTTCTG	FE671029.1	-	-	-	-	-	-	-	-	-	-	-	-	-	-	-	-
1274	CATGTTGAACCAGAGAGGGTTATGAA	FE671027.1	-	-	-	-	-	-	-	-	-	-	-	-	-	-	-	-
1275	CATGGATATAGAAAGAAACAGTCTCA	FE671026.1	-	-	-	-	-	-	-	-	-	-	-	-	-	-	-	-
1278	CATGTCCTCTGGGTGTACTCCTGATT	FE671407.1	-	-	-	-	-	BG453642	8e-05	1	0	AB056452	0	Vigna unguiculata VuP5CS mRNA, complete cds	VuP5CS protein	Q9AYM4_VIGUN	-	-
1279	CATGCAGCACCTGTATGAAAGTCAGT	FE671405.1	8e-07	Arachis hypogaea cultivar JL24 16S ribosomal RNA gene, partial sequence; mitochondrial	EU982414	-	-	BQ138388	3e-07	0	0	M16859	0	Soybean 18S ribosomal RNA gene	-	-	-	Uncorrelated annotation
1280	CATGTCTGTTTCCAACAACGATGAGA	FE671404.1	-	-	-	-	-	-	-	-	-	-	-	-	-	-	-	-
1282	CATGCCATATCCATCGGAGGAGGATG	FE671402.1	-	-	-	-	-	-	-	-	-	-	-	-	-	-	-	-
1283	CATGAACCTTAAGCAAGACATTATAG	FE671401.1	-	-	-	-	-	-	-	-	-	-	-	-	-	-	-	-
1285	CATGCACTTTGCTTGGGTCTTGCACC	FE671399.1	-	-	-	-	-	-	-	-	-	-	-	-	-	-	-	-
1286	CATGTGGTGATGTTGTNCTCTAAATG	FE671398.1	5e-05	Medicago truncatula zinc finger protein, GH1 protein, hydroxyproline-rich glycoprotein, and bHLH transcription factor genes, complete cds; LTR-retrotransposon, complete sequence; beta-D-xylosidase, glycine-rich protein, putative protein, ABC transporter, NORK, BRICK1, oligopeptidase A, serine-hydroxymethyltransferase, and MADS-box protein genes, complete cds; tRNA-Ile genes, complete sequence; le…	EU306659	-	-	ES612435	2e-05	1	0	EU306659	0	Medicago truncatula zinc finger protein, GH1 protein, hydroxyproline-rich glycoprotein, and bHLH transcription factor genes, complete cds; LTR-retrotransposon, complete sequence; beta-D-xylosidase, glycine-rich protein, putative protein, ABC transporter, NORK, BRICK1, oligopeptidase A, serine-hydroxymethyltransferase, and MADS-box protein genes, complete cds; tRNA-Ile genes, complete sequence; le…	-	-	-	Correlated protein name
1287	CATGCAAAACCTGTTTGAGACTGTGA	FE671025.1	-	-	-	-	-	-	-	-	-	-	-	-	-	-	-	-
1288	CATGTGACAAACCTTGATCGCCGTGA	FE671024.1	-	-	-	-	-	CA918208	8e-05	1	0	AJ311496	0	Pisum sativum mRNA for sucrose synthase isoform 3 (sus3 gene)	Sucrose synthase isoform 3; ( EC=2.4.1.14)	Q9AVR8_PEA	-	-
1289	CATGAAGTTGGCATTTTAATTGTATT	FE671022.1	-	-	-	-	-	-	-	-	-	-	-	-	-	-	-	-
1290	CATGGTACTAAGTTTTTTCTTTAACT	FE671021.1	-	-	-	-	-	-	-	-	-	-	-	-	-	-	-	-
1292	CATGGACCGTGCTGACGTGGATGAAC	FE671017.1	-	-	-	-	-	-	-	-	-	-	-	-	-	-	-	-
1294	CATGTTTTAACTCGCTTCGAACTGTT	FE671015.1	-	-	-	-	-	-	-	-	-	-	-	-	-	-	-	-
1295	CATGGTGGATGATCTCCAAAATAAAA	FE671014.1	-	-	-	-	-	-	-	-	-	-	-	-	-	-	-	-
1296	CATGTTGAGGCAAAGCATTTCCTTCT	FE671396.1	-	-	-	-	-	-	-	-	-	-	-	-	-	-	-	-
1297	CATGGCTTAATCTTTGAGACAAGCAT	FE671394.1	8e-07	Glycine soja cultivar IT182932 26S ribosomal RNA gene, partial sequence; 26S-18S ribosomal RNA intergenic spacer, complete sequence; and 18S ribosomal RNA gene, partial sequence	EU118311	-	-	DY632543	3e-07	0	0	Z92949	0	Medicago truncatula DNA for ETS	-	-	-	Uncorrelated annotation
1298	CATGGTTAACGGTGCGGAACTCGTGC	FE671393.1	-	-	-	-	-	-	-	-	-	-	-	-	-	-	-	-
1299	CATGTGTCTACATATAGCAATTTTCT	FE671392.1	-	-	-	-	-	-	-	-	-	-	-	-	-	-	-	-
1300	CATGGAGGAATTTTTTTTCTTTCTAT	FE671391.1	-	-	-	-	-	-	-	-	-	-	-	-	-	-	-	-
1301	CATGAATTAGACCAATTCCTTCAAAG	FE671389.1	-	-	-	-	-	-	-	-	-	-	-	-	-	-	-	-
1302	CATGGAGGGAAGGCCGGCGCACGGTG	FE671388.1	-	-	-	-	-	-	-	-	-	-	-	-	-	-	-	-
1303	CATGAATGCATTTGAAACAACTCTTG	FE671387.1	-	-	-	-	-	-	-	-	-	-	-	-	-	-	-	-
1304	CATGTCTGACTTCAAAGAACAATATA	FE671012.1	-	-	-	-	-	-	-	-	-	-	-	-	-	-	-	-
1305	CATGGCAATTGTCTTGCATCTGACCC	FE671009.1	-	-	-	-	-	-	-	-	-	-	-	-	-	-	-	-
1306	CATGAATCTCAAATTGTGAGGGGGGA	FE671008.1	-	-	-	-	-	-	-	-	-	-	-	-	-	-	-	-
1308	CATGCTGCTCTCCTTTGTGCTCTCCT	FE671004.1	-	-	-	-	-	-	-	-	-	-	-	-	-	-	-	-
1309	CATGGAGATCATTCAGAATCCCACAC	FE673113.1	-	-	-	-	-	-	-	-	-	-	-	-	-	-	-	-
1310	CATGAAATATAATAAGTTTGTTTGAA	FE673111.1	-	-	-	-	-	-	-	-	-	-	-	-	-	-	-	-
1311	CATGGACCAGCTCTCACGCGCACAGA	FE673108.1	-	-	-	-	-	-	-	-	-	-	-	-	-	-	-	-
1312	CATGGGGAAAATGGGCAGCAGAGATT	FE673107.1	-	-	-	-	-	DY616534	8e-05	1	0	AB378638	8e-63	Lotus japonicus LjERF19 mRNA for transcription factor AP2-EREBP, complete cds	-	B3IX38_LOTJA	-	-
1313	CATGTATTTCTCTACAACATTTGGAA	FE673106.1	-	-	-	-	-	-	-	-	-	-	-	-	-	-	-	-
1314	CATGGGAGATGAAAATAGATTGGAGC	FE673103.1	-	-	-	-	-	-	-	-	-	-	-	-	-	-	-	-
1316	CATGTCTTCAGCAACCGGACCAGCGC	FE672248.1	-	-	-	-	-	-	-	-	-	-	-	-	-	-	-	-
1317	CATGAAAGAAGGAATGAGGACCAGTG	FE672247.1	-	-	-	-	-	-	-	-	-	-	-	-	-	-	-	-
1319	CATGTTGTGTCCTGATTCCCAGTAGC	FE672242.1	-	-	-	-	-	-	-	-	-	-	-	-	-	-	-	-
1320	CATGGCTTATCATATTGGCTGCCTCT	FE672241.1	-	-	-	-	-	-	-	-	-	-	-	-	-	-	-	-
1322	CATGGCAGACATAACACTCACAATCA	FE672238.1	-	-	-	-	-	-	-	-	-	-	-	-	-	-	-	-
1323	CATGCCACGAAAATTATCAGAGGAAA	FE673101.1	-	-	-	-	-	-	-	-	-	-	-	-	-	-	-	-
1324	CATGAGCATCATCGACATTCTAACCC	FE673100.1	-	-	-	-	-	-	-	-	-	-	-	-	-	-	-	-
1325	CATGAAGTAAAGAAAAAACCTGACTT	FE673099.1	-	-	-	-	-	-	-	-	-	-	-	-	-	-	-	-
1326	CATGAATGCCAAATTCTATACCAAAA	FE673097.1	-	-	-	-	-	-	-	-	-	-	-	-	-	-	-	-
1328	CATGCCTTGCACCCATTGCTTTGTGA	FE673095.1	-	-	-	-	-	-	-	-	-	-	-	-	-	-	-	-
1329	CATGCCGTTTCATTGCTCCAATTCTA	FE673092.1	-	-	-	-	-	CA922899	8e-05	1	0	DQ121443	0	Medicago truncatula thioredoxin h2 mRNA, complete cds	Thioredoxin h2	A1BLP7_MEDTR	-	-
1331	CATGTAAGGTTTTGGATTTTAGTGTT	FE672237.1	-	-	-	-	-	-	-	-	-	-	-	-	-	-	-	-
1332	CATGTACTTGGTCTGGTCCGTCTTCA	FE672235.1	8e-07	Cicer arietinum mRNA for hypothetical protein, clone Can137	AJ012681	Putative uncharacterized protein (Fragment)	Q9ZRW4_CICAR	-	-	-	-	-	-	-	-	-	-	-
1333	CATGCTTCATCTCCCTGTATCCACGT	FE672234.1	-	-	-	-	-	-	-	-	-	-	-	-	-	-	-	-
1334	CATGAGACCTTTTTTTTTACTTTGAG	FE672233.1	-	-	-	-	-	-	-	-	-	-	-	-	-	-	-	-
1335	CATGATGCCCTGCTTCGTTTGGTTTT	FE672232.1	-	-	-	-	-	-	-	-	-	-	-	-	-	-	-	-
1337	CATGTGTGTGATCCAGATGAATATAA	FE672230.1	8e-07	Cicer arietinum mRNA for cysteine proteinase	AJ009878	Cysteine proteinase	O81930_CICAR	-	-	-	-	-	-	-	-	-	-	-
1338	CATGCCGCCACCAATAGTTTCACATC	FE672229.1	-	-	-	-	-	-	-	-	-	-	-	-	-	-	-	-
1339	CATGATTACGACGAAAAAAAAAAGAT	FE672227.1	-	-	-	-	-	-	-	-	-	-	-	-	-	-	-	-
1341	CATGGGTTTCAACATAGCAACAGCAT	FE673089.1	-	-	-	-	-	-	-	-	-	-	-	-	-	-	-	-
1342	CATGACCATAGTTACCACCACCATTG	FE673087.1	8e-07	Cicer arietinum mRNA for glycine-rich protein 2, partial	AJ012829	Glycine-rich protein 2 (Fragment)	Q9ZRV2_CICAR	-	-	-	-	-	-	-	-	-	-	-
1344	CATGAGTTTTATACTTTTATTATGAT	FE673085.1	-	-	-	-	-	-	-	-	-	-	-	-	-	-	-	-
1345	CATGCTCACTTTGGGATTCTCCAATC	FE673084.1	-	-	-	-	-	-	-	-	-	-	-	-	-	-	-	-
1346	CATGTTCAACCAAAAACACACGTGGC	FE673083.1	-	-	-	-	-	-	-	-	-	-	-	-	-	-	-	-
1347	CATGCATTCAACTTCCCACTAAAAGG	FE673082.1	-	-	-	-	-	-	-	-	-	-	-	-	-	-	-	-
1349	CATGAGATTGTGTACTTGACTTATTA	FE673078.1	-	-	-	-	-	DW019204	8e-05	0	0	DQ004739	1e-95	Phaseolus lunatus glutathione peroxidase (GP1) mRNA, partial cds	Glutathione peroxidase (Fragment)	Q4ZJ67_PHALU	-	-
1350	CATGTGCCACATTAATACTAAAAAAT	FE672223.1	-	-	-	-	-	-	-	-	-	-	-	-	-	-	-	-
1351	CATGCCGAGGTCTGCGGGTCCCACAT	FE672222.1	-	-	-	-	-	-	-	-	-	-	-	-	-	-	-	-
1352	CATGCTTTTGAATCAATTGCCTTCTG	FE672221.1	-	-	-	-	-	-	-	-	-	-	-	-	-	-	-	-
1353	CATGTTGGTGGAAATGGTTCTGATGA	FE672220.1	-	-	-	-	-	-	-	-	-	-	-	-	-	-	-	-
1354	CATGTGTAGGTTAATAATGCTGGCTT	FE672218.1	-	-	-	-	-	-	-	-	-	-	-	-	-	-	-	-
1355	CATGAACCGGAATTGCAAACCGGGGA	FE672215.1	-	-	-	-	-	-	-	-	-	-	-	-	-	-	-	-
1357	CATGGCTAATCTCCCGTTCTTAATTT	FE673076.1	-	-	-	-	-	-	-	-	-	-	-	-	-	-	-	-
1358	CATGTCCTACATAGGCCTCCTTATAA	FE673075.1	-	-	-	-	-	CX536140	3e-07	0	0	DQ857265	4e-05	Glycine max Dof15 mRNA, partial cds	Dof15 (Fragment)	Q0GLD7_SOYBN	-	-
1360	CATGCAAATAACTCCTTCTCTTTAAG	FE673071.1	-	-	-	-	-	-	-	-	-	-	-	-	-	-	-	-
1361	CATGAGTAGCATAGAAAATGTAAATA	FE673070.1	-	-	-	-	-	-	-	-	-	-	-	-	-	-	-	-
1362	CATGGCGAAACTCGCCGACCAAGCCG	FE673067.1	-	-	-	-	-	DY618419	8e-05	1	0	AJ238682	0	Pisum sativum mRNA for 14-3-3-like protein, sequence 2	14-3-3-like protein	Q9XG89_PEA	-	-
1363	CATGCATAAACCACATAAGCATACCG	FE673066.1	-	-	-	-	-	-	-	-	-	-	-	-	-	-	-	-
1365	CATGTAGCACAATAAACACTAGCCTT	FE672212.1	-	-	-	-	-	-	-	-	-	-	-	-	-	-	-	-
1366	CATGCAAATCATAGCTTTGATCCATT	FE672211.1	-	-	-	-	-	-	-	-	-	-	-	-	-	-	-	-
1367	CATGCCTGCTGGAAGGACGATATCAA	FE672210.1	-	-	-	-	-	DW018725	8e-05	1	0	AY181257	1e-09	Stylosanthes hamata cation diffusion facilitator 9 mRNA, complete cds	Cation diffusion facilitator 9	Q84ND5_STYHA	-	-
1368	CATGAGCTACAAGAAAATTCCTGCTG	FE672208.1	-	-	-	-	-	-	-	-	-	-	-	-	-	-	-	-
1369	CATGACCAATATTATCCCTACCCTGA	FE672207.1	-	-	-	-	-	-	-	-	-	-	-	-	-	-	-	-
1370	CATGATACCAGGGACACAAGGGGGAA	FE672206.1	-	-	-	-	-	-	-	-	-	-	-	-	-	-	-	-
1372	CATGACAAGGATAGGAGCAAACAAGT	FE672203.1	-	-	-	-	-	-	-	-	-	-	-	-	-	-	-	-
1374	CATGAAAGAAAGAAAATGGTACAATA	FE673064.1	-	-	-	-	-	-	-	-	-	-	-	-	-	-	-	-
1376	CATGAAATAAGGAACACTGGGTCTTC	FE673061.1	-	-	-	-	-	-	-	-	-	-	-	-	-	-	-	-
1377	CATGGGCCGCCGGAATTGGCGGAGCA	FE673058.1	-	-	-	-	-	-	-	-	-	-	-	-	-	-	-	-
1378	CATGTGGAACTTACTGAAACAGAAGA	FE673057.1	-	-	-	-	-	-	-	-	-	-	-	-	-	-	-	-
1379	CATGGCTATTTCATCTCCACCTCACA	FE673056.1	-	-	-	-	-	-	-	-	-	-	-	-	-	-	-	-
1380	CATGCCACTGCATTCAGGATACGGCT	FE673055.1	-	-	-	-	-	-	-	-	-	-	-	-	-	-	-	-
1381	CATGGACCCCACAAAGTCAACTGGAC	FE672200.1	-	-	-	-	-	-	-	-	-	-	-	-	-	-	-	-
1382	CATGCTTTTGACCCTATCTACCAAAT	FE672199.1	-	-	-	-	-	-	-	-	-	-	-	-	-	-	-	-
1384	CATGGGAAAAAGACAAATTATACAAT	FE672196.1	-	-	-	-	-	-	-	-	-	-	-	-	-	-	-	-
1386	CATGGTCAAGCCTCCGGGGGGGGCTC	FE672194.1	-	-	-	-	-	-	-	-	-	-	-	-	-	-	-	-
1387	CATGGGCTTTTGTTCCGTCCCATCAA	FE672193.1	-	-	-	-	-	-	-	-	-	-	-	-	-	-	-	-
1388	CATGTAAAACTTCTACTACGTATGTG	FE672192.1	-	-	-	-	-	-	-	-	-	-	-	-	-	-	-	-
1389	CATGCCTCCAGGATTTCTACTTGAAG	FE672191.1	-	-	-	-	-	-	-	-	-	-	-	-	-	-	-	-
1391	CATGAAACAGATGTGATGACCTTGAA	FE673052.1	-	-	-	-	-	-	-	-	-	-	-	-	-	-	-	-
1392	CATGGGACCGGCTGATAGCCCATACA	FE673051.1	-	-	-	-	-	AJ501634	5e-06	0	0	DQ887085	7e-140	Arachis hypogaea ubiquitin carrier-like protein mRNA, complete cds	Ubiquitin carrier protein; ( EC=6.3.2.-)	Q06H23_ARAHY	-	-
1393	CATGGCTTCCTCTCCACCAAACTCCA	FE673050.1	-	-	-	-	-	-	-	-	-	-	-	-	-	-	-	-
1394	CATGATAATGCTTTTGTTGCATCTCG	FE673049.1	-	-	-	-	-	-	-	-	-	-	-	-	-	-	-	-
1395	CATGTAATTATTACTTAAAGGGCAAC	FE673047.1	-	-	-	-	-	-	-	-	-	-	-	-	-	-	-	-
1396	CATGAAGATGAAGGAGAAAGTGAATG	FE673046.1	-	-	-	-	-	-	-	-	-	-	-	-	-	-	-	-
1397	CATGGCTTCACATCCATCAAAACAGA	FE673045.1	-	-	-	-	-	-	-	-	-	-	-	-	-	-	-	-
1398	CATGTCTATAAATTGAAGCAATTTCT	FE673044.1	-	-	-	-	-	-	-	-	-	-	-	-	-	-	-	-
1399	CATGTAATTCTTCTGCACCCATTTCA	FE672189.1	-	-	-	-	-	CX541958	3e-07	0	0	AB083025	5e-48	Glycine max mRNA for syringolide-induced protein 19-1-5, complete cds	Syringolide-induced protein 19-1-5	Q8S902_SOYBN	-	-
1400	CATGGACTTCTCCCCAGGCTTCCATC	FE672186.1	-	-	-	-	-	CX539871	3e-07	0	0	AJ315851	0	Pisum sativum mRNA for 2-Cys peroxiredoxin	2-Cys peroxiredoxin	Q93X25_PEA	-	-
1401	CATGATTGAATTTGTGTTGGACGATT	FE672185.1	-	-	-	-	-	-	-	-	-	-	-	-	-	-	-	-
1402	CATGACAACTAGTAGATAATTATGGA	FE672184.1	-	-	-	-	-	-	-	-	-	-	-	-	-	-	-	-
1403	CATGGCATCCAAAACCGGTGACTTTT	FE672183.1	-	-	-	-	-	-	-	-	-	-	-	-	-	-	-	-
1404	CATGAAAAAGGGATTTGTATCAATAT	FE672182.1	-	-	-	-	-	-	-	-	-	-	-	-	-	-	-	-
1405	CATGTCTATCAAAGAATTCTCCAATA	FE672181.1	-	-	-	-	-	-	-	-	-	-	-	-	-	-	-	-
1406	CATGATTGTGATCTGCTTGGCATNTA	FE672180.1	-	-	-	-	-	-	-	-	-	-	-	-	-	-	-	-
1407	CATGTCTAGAACAAAATACCGTCATT	FE672179.1	-	-	-	-	-	-	-	-	-	-	-	-	-	-	-	-
1408	CATGTCGTTCAGTCCTTGATAGAGGG	FE673040.1	-	-	-	-	-	-	-	-	-	-	-	-	-	-	-	-
1409	CATGCATAACTTCCATACCAAGGTAA	FE673038.1	-	-	EU835853	-	0	-	-	-	-	-	-	-	-	-	-	-
1410	CATGTAATTGAATTCTATCAGTTACA	FE673035.1	-	-	-	-	-	-	-	-	-	-	-	-	-	-	-	-
1411	CATGTTGTTGGATTTGCTCCGGGTCC	FE673033.1	-	-	-	-	-	-	-	-	-	-	-	-	-	-	-	-
1412	CATGTACGCCGGCAAAGACGCCAGCA	FE673031.1	-	-	-	-	-	-	-	-	-	-	-	-	-	-	-	-
1414	CATGATGAATCCTTTATTTACCCACA	FE672176.1	-	-	-	-	-	-	-	-	-	-	-	-	-	-	-	-
1415	CATGCACTTTTCTATCCTCCAACTTA	FE672175.1	-	-	-	-	-	-	-	-	-	-	-	-	-	-	-	-
1417	CATGGATGGCTAATTTTCTCAGCCAC	FE672171.1	-	-	-	-	-	-	-	-	-	-	-	-	-	-	-	-
1418	CATGCCACTCGATCTGGATGGCGCCC	FE672170.1	-	-	-	-	-	-	-	-	-	-	-	-	-	-	-	-
1420	CATGTGTTTACCATTTTCTAATATTG	FE672168.1	-	-	-	-	-	-	-	-	-	-	-	-	-	-	-	-
1421	CATGGCTGTTATAAAACAAAAGGATT	FE672167.1	-	-	-	-	-	-	-	-	-	-	-	-	-	-	-	-
1422	CATGCGCGTCACTAATTAAATGACAA	FE673029.1	-	-	-	-	-	-	-	-	-	-	-	-	-	-	-	-
1423	CATGGGTAACCTGCATAACCTTAGTA	FE673028.1	-	-	-	-	-	-	-	-	-	-	-	-	-	-	-	-
1425	CATGATGAGTGGACTCTTCAGGATGA	FE673023.1	-	-	-	-	-	-	-	-	-	-	-	-	-	-	-	-
1426	CATGGTCTTTCTACAGAGCTGGGATA	FE673022.1	8e-07	Vicia faba aquaporin mRNA, complete cds	AY667436	Aquaporin	Q6BCH6_VICFA	CX541218	3e-07	0	0	AF004708	0	Medicago sativa aquaporin-like transmembrane channel protein (pAFI 8-1) mRNA, complete cds	Aquaporin-like transmembrane channel protein	O22339_MEDSA	no	Correlated protein name
1427	CATGTTGGTTTACCAGGATCTCCTTA	FE673021.1	8e-07	M.sativa mRNA for TCTP-like protein	X98618	Translationally-controlled tumor protein homolog; ( Short=TCTP)	TCTP_MEDSA	DY616853	3e-07	0	0	X98618	0	M.sativa mRNA for TCTP-like protein	Translationally-controlled tumor protein homolog; ( Short=TCTP)	TCTP_MEDSA	correlated ID	-
1428	CATGGGTCTTGTTGAACAAAGAACCC	FE673020.1	-	-	-	-	-	CB891226	3e-07	0	0	AB236792	0	Trifolium pratense RNA for putative DNA binding protein, partial cds, clone: C1861	Putative DNA binding protein (Fragment)	Q2PEV8_TRIPR	-	-
1429	CATGATTTGCCTCCCCAATATGATGC	FE673019.1	-	-	-	-	-	-	-	-	-	-	-	-	-	-	-	-
1430	CATGCTGACTTCTTTGGTTTTTCCGG	FE673018.1	-	-	-	-	-	-	-	-	-	-	-	-	-	-	-	-
1431	CATGGCTTGAATCACTGAGAGATGCC	FE672165.1	-	-	-	-	-	-	-	-	-	-	-	-	-	-	-	-
1432	CATGAATTCTCTCACCTTCCCACGGC	FE672164.1	-	-	-	-	-	-	-	-	-	-	-	-	-	-	-	-
1433	CATGGGTATTGGACTTGCAAGAAAAT	FE672162.1	-	-	-	-	-	-	-	-	-	-	-	-	-	-	-	-
1436	CATGAGAAGAAATTCAGGCTCATCCT	FE672158.1	-	-	-	-	-	-	-	-	-	-	-	-	-	-	-	-
1437	CATGCACCATAAGTGATGACTCTGAT	FE672157.1	-	-	-	-	-	-	-	-	-	-	-	-	-	-	-	-
1438	CATGTAAAATTGAAAGACGGGCAAGA	FE672156.1	-	-	-	-	-	-	-	-	-	-	-	-	-	-	-	-
1440	CATGCACTTGGTTTTGTAGTGGTACA	FE673497.1	-	-	-	-	-	-	-	-	-	-	-	-	-	-	-	-
1441	CATGCTTCGCAAAGGTGTTGCATACA	FE673496.1	-	-	-	-	-	-	-	-	-	-	-	-	-	-	-	-
1444	CATGATGAATTAAAACCAAATTTTTT	FE673492.1	-	-	-	-	-	-	-	-	-	-	-	-	-	-	-	-
1445	CATGGGTGTCAAAGGTTTTTTTGAAG	FE673491.1	-	-	-	-	-	-	-	-	-	-	-	-	-	-	-	-
1446	CATGGCAGAAGCAATATCTTCCCAAT	FE673490.1	-	-	-	-	-	-	-	-	-	-	-	-	-	-	-	-
1447	CATGTGTTCACTTCGCTCAGATCAAT	FE673487.1	-	-	-	-	-	-	-	-	-	-	-	-	-	-	-	-
1450	CATGGGATTCACCTAAAGAACATATC	FE673484.1	-	-	-	-	-	-	-	-	-	-	-	-	-	-	-	-
1451	CATGTTTTCAACAACAACTAAGTCTT	FE673483.1	-	-	-	-	-	-	-	-	-	-	-	-	-	-	-	-
1453	CATGGAGGATTATTTGTATCCATCAT	FE673481.1	-	-	-	-	-	-	-	-	-	-	-	-	-	-	-	-
1454	CATGAATGTACTGCATTCCATTCCAT	FE673480.1	-	-	-	-	-	-	-	-	-	-	-	-	-	-	-	-
1455	CATGTCACCTCAATGGGTACTGCTGG	FE673479.1	-	-	-	-	-	-	-	-	-	-	-	-	-	-	-	-
1456	CATGGGTATTCTTTCCCGCCTCGTCA	FE673478.1	-	-	-	-	-	-	-	-	-	-	-	-	-	-	-	-
1460	CATGAATGAAAAACCCCCATTTACAG	FE673470.1	-	-	-	-	-	-	-	-	-	-	-	-	-	-	-	-
1461	CATGCAGCAAATTGAATAGTGCAATG	FE673469.1	-	-	-	-	-	-	-	-	-	-	-	-	-	-	-	-
1462	CATGTTTCTTCAAGAAAGCAGTCAAG	FE673468.1	-	-	-	-	-	-	-	-	-	-	-	-	-	-	-	-
1463	CATGCTACAAAAATATTTTCATACAT	FE673466.1	-	-	-	-	-	-	-	-	-	-	-	-	-	-	-	-
1466	CATGGTGAAACACCGTCTGCTGATTA	FE673462.1	-	-	-	-	-	-	-	-	-	-	-	-	-	-	-	-
1467	CATGGACCAAACTTGGGTAACCCAAG	FE673461.1	-	-	-	-	-	AA660253	2e-05	1	0	AF072931	0	Medicago sativa chlorophyll a/b binding protein (CARCAB1) mRNA, complete cds	Chlorophyll a/b binding protein	O81391_MEDSA	-	-
1469	CATGGATGATAGCAATGAAGATCAAA	FE673458.1	-	-	-	-	-	-	-	-	-	-	-	-	-	-	-	-
1470	CATGCAAAATGGTAGGACCATATAAA	FE673457.1	8e-07	Cicer arietinum mRNA for unidentified protein	AJ225026	Putative uncharacterized protein	O65742_CICAR	-	-	-	-	-	-	-	-	-	-	-
1471	CATGGACCCCAATCAAGGCCTTTGTC	FE673456.1	-	-	-	-	-	-	-	-	-	-	-	-	-	-	-	-
1473	CATGTGGCGTTCCTCTTCGTCTAAGC	FE673454.1	-	-	-	-	-	-	-	-	-	-	-	-	-	-	-	-
1474	CATGACGACCTGCTTCTGGCCGCCTC	FE673453.1	-	-	-	-	-	-	-	-	-	-	-	-	-	-	-	-
1478	CATGTGAAACTGAGCTGCCCAGACTT	FE673449.1	-	-	-	-	-	-	-	-	-	-	-	-	-	-	-	-
1480	CATGCCCTGAAATCAGCTGCGTCAAA	FE673440.1	-	-	-	-	-	-	-	-	-	-	-	-	-	-	-	-
1481	CATGGGACGGTGAACTCCGTCTTTGG	FE673439.1	-	-	-	-	-	-	-	-	-	-	-	-	-	-	-	-
1482	CATGTCCTAACATCATCGGTGAAGTC	FE673438.1	-	-	-	-	-	EV259537	3e-07	0	0	EU380189	7e-162	Glycine max cultivar Sinpaldal 2 dihydroflavonol reductase mRNA, complete cds	Dihydroflavonol reductase	B0LVF3_SOYBN	-	-
1483	CATGTCAAAAACTTATATCATATCCT	FE673437.1	-	-	-	-	-	-	-	-	-	-	-	-	-	-	-	-
1484	CATGTTCGCTGAATAAATAGTATGTT	FE673436.1	-	-	-	-	-	-	-	-	-	-	-	-	-	-	-	-
1486	CATGCTAAGATGAGTAAAAAGTATGA	FE673433.1	-	-	-	-	-	-	-	-	-	-	-	-	-	-	-	-
1487	CATGGCCCCCTCGGCCGAACACACCG	FE673431.1	-	-	-	-	-	-	-	-	-	-	-	-	-	-	-	-
1488	CATGATGAACACAGAGGTGGCGTCTT	FE673430.1	-	-	-	-	-	-	-	-	-	-	-	-	-	-	-	-
1489	CATGGCCAAAAAGAACCTCAATCCTC	FE673426.1	-	-	-	-	-	-	-	-	-	-	-	-	-	-	-	-
1491	CATGATAATCCTCCCACCCCTTGAAA	FE673423.1	-	-	-	-	-	-	-	-	-	-	-	-	-	-	-	-
1492	CATGAAGAAACAAATGCTTATATATT	FE673421.1	-	-	-	-	-	-	-	-	-	-	-	-	-	-	-	-
1495	CATGCAAAGCACATCTATTAGTGTGT	FE673417.1	-	-	-	-	-	-	-	-	-	-	-	-	-	-	-	-
1498	CATGCGCGTCTCTAATTAGATGACGA	FE673410.1	-	-	-	-	-	-	-	-	-	-	-	-	-	-	-	-
1499	CATGGTAAATTGTGAAAAAGCAAACA	FE673409.1	-	-	-	-	-	-	-	-	-	-	-	-	-	-	-	-
1500	CATGTGAAGATACCATTGCTGAAAGA	FE673408.1	8e-07	Medicago truncatula mRNA for beclin 1 protein (atg6 gene)	AM075833	Beclin 1 protein	Q4A185_MEDTR	-	-	-	-	-	-	-	-	-	-	-
1501	CATGCCAGAGAAGGGTGACTGGCGTT	FE673407.1	-	-	-	-	-	-	-	-	-	-	-	-	-	-	-	-
1503	CATGCCTTGTTCAAAGACACCGACCC	FE673405.1	-	-	-	-	-	-	-	-	-	-	-	-	-	-	-	-
1505	CATGTGGCATCTGGTACAAGCCGGTT	FE673403.1	-	-	-	-	-	-	-	-	-	-	-	-	-	-	-	-
1506	CATGCAAGAACCCATCATAAAGCTTT	FE673402.1	-	-	-	-	-	-	-	-	-	-	-	-	-	-	-	-
1507	CATGCTTCACATAATCCAGATCGCCC	FE671768.1	-	-	-	-	-	-	-	-	-	-	-	-	-	-	-	-
1508	CATGCTTTGCTACATTAAATCCAGTC	FE671767.1	-	-	-	-	-	-	-	-	-	-	-	-	-	-	-	-
1509	CATGCTGATCCTGATGATCTTGGGAA	FE671765.1	8e-07	Arachis hypogaea cultivar JL-24 Cu-Zn superoxide dismutase mRNA, complete cds	DQ499511	Superoxide dismutase [Cu-Zn]; ( EC=1	Q1HDS7_ARAHY	CX538673	3e-07	0	0	AB189165	0	Pisum sativum mRNA for copper zinc superoxide dismutase, complete cds	Superoxide dismutase [Cu-Zn]; ( EC=1.15.1.1)	Q5DWE8_PEA	no	Correlated protein name
1510	CATGAAACTTTGCCTTAGCCAAAAGC	FE671764.1	-	-	-	-	-	BQ146389	8e-05	0	0	U84198	1e-14	Pisum sativum lipoxygenase (Lox1:Ps:1) gene, complete cds	Lipoxygenase; ( EC=1.13.11.12)	O24470_PEA	-	-
1511	CATGTTAATTACGGTTCGACCGACCT	FE671762.1	-	-	-	-	-	-	-	-	-	-	-	-	-	-	-	-
1512	CATGGAGCTCTATTGCAGAGCAGCAA	FE671761.1	-	-	-	-	-	-	-	-	-	-	-	-	-	-	-	-
1513	CATGGAGTTGATCAAACCACACCAGA	FE671760.1	-	-	-	-	-	-	-	-	-	-	-	-	-	-	-	-
1514	CATGGAGAATCGATCCTTCGACCACG	FE671758.1	-	-	-	-	-	-	-	-	-	-	-	-	-	-	-	-
1515	CATGTTCTCAAACTCACCTCCATCTT	FE671756.1	-	-	-	-	-	-	-	-	-	-	-	-	-	-	-	-
1516	CATGGTTTTCTGGGTTTTTGGTTATG	FE671755.1	-	-	-	-	-	-	-	-	-	-	-	-	-	-	-	-
1518	CATGATGTGTGACCAACCAAAGGTGT	FE671751.1	-	-	-	-	-	-	-	-	-	-	-	-	-	-	-	-
1519	CATGTTTCCTGTGAGAGGTACTTTGG	FE671750.1	-	-	-	-	-	-	-	-	-	-	-	-	-	-	-	-
1521	CATGGGTGGAACAAATGGTAACTATC	FE671746.1	-	-	-	-	-	-	-	-	-	-	-	-	-	-	-	-
1522	CATGCAAAGTTGAGAATGTAAAACGG	FE671743.1	-	-	-	-	-	-	-	-	-	-	-	-	-	-	-	-
1524	CATGTATATTGAGGTTTTTAACAGAG	FE671740.1	-	-	-	-	-	-	-	-	-	-	-	-	-	-	-	-
1525	CATGGAGTTGTCAAAACCCAGCCCAG	FE671739.1	-	-	-	-	-	-	-	-	-	-	-	-	-	-	-	-
1526	CATGTTTTACTTTTTCTATCTTTGTT	FE671738.1	8e-07	Cicer arietinum partial mRNA for putative proline-rich protein APG isolog	AJ276421	Putative proline-rich protein APG isolog (Fragment)	Q9FT04_CICAR	-	-	-	-	-	-	-	-	-	-	-
1529	CATGGCTTCCAATCAGCCTCCTTAAG	FE671733.1	-	-	-	-	-	-	-	-	-	-	-	-	-	-	-	-
1530	CATGGTGCTAATAGCGGTCTTGATAT	FE671732.1	-	-	-	-	-	-	-	-	-	-	-	-	-	-	-	-
1531	CATGGATCTTACTGAGTTGCCACTAT	FE671730.1	-	-	-	-	-	-	-	-	-	-	-	-	-	-	-	-
1532	CATGGATTCCGAGAACACGGCCAAGG	FE671728.1	-	-	-	-	-	-	-	-	-	-	-	-	-	-	-	-
1533	CATGGAAATAATTCACAATCCCACAC	FE671727.1	-	-	-	-	-	-	-	-	-	-	-	-	-	-	-	-
1534	CATGAACGACATCCACGGAGTTGCGA	FE671726.1	-	-	-	-	-	-	-	-	-	-	-	-	-	-	-	-
1535	CATGTACTTTGATAGGCTTGTTCAGA	FE671724.1	-	-	-	-	-	-	-	-	-	-	-	-	-	-	-	-
1537	CATGGGACAATTTCTTTAGGAACTTT	FE671720.1	-	-	-	-	-	-	-	-	-	-	-	-	-	-	-	-
1538	CATGGGATGTACTGCTGAGTATGGTG	FE671718.1	-	-	-	-	-	-	-	-	-	-	-	-	-	-	-	-
1539	CATGGCACAGGAAATCAACCGAACCC	FE671714.1	-	-	-	-	-	-	-	-	-	-	-	-	-	-	-	-
1540	CATGGAGATAATTCAAAATCCCACAC	FE671712.1	-	-	-	-	-	-	-	-	-	-	-	-	-	-	-	-
1541	CATGTTACTATTTTTTTCTCTAGAAA	FE671711.1	-	-	-	-	-	-	-	-	-	-	-	-	-	-	-	-
1542	CATGTTTCTCTATCCACCCTAGTACA	FE671710.1	-	-	-	-	-	-	-	-	-	-	-	-	-	-	-	-
1543	CATGAAAGGTGTAGCAACAGCTGCTG	FE671709.1	-	-	-	-	-	-	-	-	-	-	-	-	-	-	-	-
1544	CATGGACGCAGCATCGCAGCTTGTCT	FE671708.1	-	-	-	-	-	-	-	-	-	-	-	-	-	-	-	-
1545	CATGTCTTCTGTCACAGATATTCCCA	FE671707.1	-	-	-	-	-	-	-	-	-	-	-	-	-	-	-	-
1547	CATGTAGTACCAAGAGGAACAACTTG	FE671702.1	-	-	-	-	-	CA920536	8e-05	0	0	AJ867391	0	Medicago truncatula mRNA for glycosyltransferase (a1 gene)	Glycosyltransferase	Q5QPZ6_MEDTR	-	-
1548	CATGGGTTTACATAATGCCTCAGCTT	FE671701.1	-	-	-	-	-	-	-	-	-	-	-	-	-	-	-	-
1549	CATGGCAAACGAAACTATACTTATTC	FE671700.1	-	-	-	-	-	-	-	-	-	-	-	-	-	-	-	-
1551	CATGCCTTTGAGCCTCCTCCACTAGT	FE671698.1	-	-	-	-	-	CX525793	8e-05	1	0	AF236109	9e-130	Phaseolus vulgaris putative purple acid phosphatase (PAP) mRNA, complete cds	Putative purple acid phosphatase	Q9LL79_PHAVU	-	-
1552	CATGTGGCATCAAATACAGGACCTGC	FE671694.1	-	-	-	-	-	-	-	-	-	-	-	-	-	-	-	-
1553	CATGGCAGCTGCTTCTCCTATGGCAA	FE671691.1	-	-	-	-	-	-	-	-	-	-	-	-	-	-	-	-
1554	CATGCTCAGCTCAATAGCTTAGAAGA	FE671690.1	-	-	-	-	-	-	-	-	-	-	-	-	-	-	-	-
1556	CATGAAAACAATGGAAGGAAAAGTGG	FE671684.1	-	-	-	-	-	DW016347	2e-05	0	0	M31025	6e-54	Pea chloroplast ribosomal protein S17 (rps17) mRNA, 3' end	30S ribosomal protein S17, chloroplastic precursor (Fragment); (AltName	RR17_PEA	-	-
1557	CATGGCTACCCTCCAGAAGGGGGTTA	FE671679.1	-	-	-	-	-	-	-	-	-	-	-	-	-	-	-	-
1558	CATGTACCCTCCTCTCCCTCAAAGCA	FE671678.1	-	-	-	-	-	-	-	-	-	-	-	-	-	-	-	-
1559	CATGAGATACTATAAGCATTCAATCC	FE671677.1	-	-	-	-	-	-	-	-	-	-	-	-	-	-	-	-
1560	CATGGGTTGTTGTCTCCTGAGAAAGC	FE671675.1	-	-	-	-	-	-	-	-	-	-	-	-	-	-	-	-
1561	CATGGAGTTCTATATTGTAATTTCAC	FE671674.1	-	-	-	-	-	-	-	-	-	-	-	-	-	-	-	-
1562	CATGATGATGCCTCCTCAGCCACAAC	FE673016.1	-	-	-	-	-	-	-	-	-	-	-	-	-	-	-	-
1563	CATGGCTATTTGGCTATGGTATTGGA	FE673014.1	-	-	-	-	-	DW018271	1e-06	0	0	DQ889550	4e-89	Arachis hypogaea clone 1E39 lactoylglutathione lyase mRNA, complete cds	-	-	-	-
1564	CATGGATTAGCATTATGTCGTTCCTA	FE673012.1	-	-	-	-	-	-	-	-	-	-	-	-	-	-	-	-
1565	CATGAATAATCTATCAAATATAACAC	FE673009.1	-	-	-	-	-	-	-	-	-	-	-	-	-	-	-	-
1566	CATGGCTTTGATGAGATCCTTCTTCT	FE673007.1	-	-	-	-	-	EY475916	3e-07	0	0	U78952	7e-146	Pisum sativum hydroxyproline rich glycoprotein PsHRGP1 mRNA, partial cds	Probable 60S ribosomal protein L14; (AltName	RL14_PEA	-	-
1567	CATGTTCCCATTTGCCACCTCTGATG	FE673006.1	-	-	-	-	-	-	-	-	-	-	-	-	-	-	-	-
1568	CATGGGAGGTGACGCAACCGCTGAAA	FE672537.1	-	-	-	-	-	-	-	-	-	-	-	-	-	-	-	-
1570	CATGCGTACAGCTGCACAATGACCAA	FE672534.1	-	-	-	-	-	-	-	-	-	-	-	-	-	-	-	-
1571	CATGCTTGAAGGAAAAACTCCGATTC	FE672532.1	-	-	-	-	-	AL378315	8e-05	1	0	AF338813	8e-28	Glycine max putative receptor-like protein kinase RLPK1 gene, partial cds	Putative receptor-like protein kinase RLPK1 (Fragment)	Q8VWW7_SOYBN	-	-
1572	CATGGCATTGGTGTTAAACAAGAACT	FE672531.1	-	-	-	-	-	-	-	-	-	-	-	-	-	-	-	-
1573	CATGCATCAACATTCAAACCGCCGCA	FE672530.1	-	-	-	-	-	-	-	-	-	-	-	-	-	-	-	-
1574	CATGTTGTCATTGTTGGTGGTGGGAT	FE672529.1	-	-	-	-	-	-	-	-	-	-	-	-	-	-	-	-
1575	CATGAGCAGTTCCTTCAGTAAACTTC	FE672527.1	-	-	-	-	-	-	-	-	-	-	-	-	-	-	-	-
1576	CATGGGTTAGTCGATACTAAGGGACG	FE672526.1	-	-	-	-	-	BI265508	8e-05	1	0	EF571299	0	Glycyrrhiza uralensis 26S ribosomal RNA, partial sequence	-	-	-	-
1578	CATGTACATCCTCTTTGTCAGTTACT	FE673001.1	-	-	-	-	-	-	-	-	-	-	-	-	-	-	-	-
1579	CATGTTGGTATTCTTGACTCTTTGCG	FE673000.1	-	-	-	-	-	-	-	-	-	-	-	-	-	-	-	-
1580	CATGCTGGTGGCATAGAGCAACTATC	FE672999.1	-	-	-	-	-	-	-	-	-	-	-	-	-	-	-	-
1581	CATGTGTAACTTCAGATTCTATTAGT	FE672996.1	-	-	-	-	-	-	-	-	-	-	-	-	-	-	-	-
1582	CATGGCGGTTTCAGGTTTAAAAACTG	FE672995.1	-	-	-	-	-	-	-	-	-	-	-	-	-	-	-	-
1583	CATGAGTAAGTGAGAACCATATGCAT	FE672994.1	-	-	-	-	-	-	-	-	-	-	-	-	-	-	-	-
1584	CATGGTGCCAATAGACTCGGTGCAAA	FE672524.1	-	-	-	-	-	-	-	-	-	-	-	-	-	-	-	-
1586	CATGCTATGGAAATTATTCATTTGCT	FE672516.1	8e-07	Cicer arietinum mRNA for 40S ribosomal protein S5	AJ005346	40S ribosomal protein S5 (Fragment)	RS5_CICAR	EV256989	8e-05	1	0	AJ005346	8e-168	Cicer arietinum mRNA for 40S ribosomal protein S5	40S ribosomal protein S5 (Fragment)	RS5_CICAR	correlated ID	-
1588	CATGTTATGCCACTTCTGGAAATTGT	FE672992.1	-	-	-	-	-	BQ123795	8e-05	1	0	AB333787	1e-162	Glycine max mRNA for peroxisomal fatty acid beta-oxidation multifunctional protein, complete cds	Peroxisomal fatty acid beta-oxidation multifunctional protein	B0M199_SOYBN	-	-
1589	CATGGCAACTAGACTTCAGTTTGAGA	FE672990.1	-	-	-	-	-	CB893338	1e-06	0	0	AB236812	6e-147	Trifolium pratense RNA for putative eukaryotic translation initiation factor 6, complete cds, clone: C213	Putative eukaryotic translation initiation factor 6	Q2PET8_TRIPR	-	-
1590	CATGTCATTTTGCATCCTTTCCAGCG	FE672989.1	-	-	-	-	-	-	-	-	-	-	-	-	-	-	-	-
1591	CATGGCCGGTAATCAATTAAACGGCG	FE672987.1	-	-	-	-	-	-	-	-	-	-	-	-	-	-	-	-
1593	CATGCTGATGATCTCCTAGCTCCTGT	FE672985.1	-	-	-	-	-	-	-	-	-	-	-	-	-	-	-	-
1594	CATGACCATAATTACCACCGCCGTGG	FE672983.1	8e-07	Cicer arietinum mRNA for glycine-rich protein 2, partial	AJ012829	Glycine-rich protein 2 (Fragment)	Q9ZRV2_CICAR	-	-	-	-	-	-	-	-	-	-	-
1595	CATGTTGTAGCTGCTCCCTGCTGGAC	FE672512.1	5e-05	Pisum sativum short-chain dehydrogenase Tic32 mRNA, complete cds; nuclear gene for chloroplast product	AY488758	Short-chain dehydrogenase Tic32	Q6RVV4_PEA	BG452522	8e-05	1	0	AY488758	3e-175	Pisum sativum short-chain dehydrogenase Tic32 mRNA, complete cds; nuclear gene for chloroplast product	Short-chain dehydrogenase Tic32	Q6RVV4_PEA	correlated ID	-
1596	CATGAATGATCTTGGTATGCTAATGG	FE672511.1	-	-	-	-	-	-	-	-	-	-	-	-	-	-	-	-
1598	CATGTATTATCTGTACTAATGAACTT	FE672508.1	-	-	-	-	-	-	-	-	-	-	-	-	-	-	-	-
1599	CATGCAATCACTGCTTATGCAAGGGA	FE672506.1	-	-	-	-	-	-	-	-	-	-	-	-	-	-	-	-
1600	CATGACGATCAACAAACTCCTCACCC	FE672505.1	-	-	-	-	-	-	-	-	-	-	-	-	-	-	-	-
1601	CATGGCTTAGTGATATTGAATAATGT	FE672504.1	8e-07	Cicer arietinum defensin (AFP) gene, promoter region and complete cds	DQ342338	Defensin	Q2I2W0_CICAR	-	-	-	-	-	-	-	-	-	-	-
1603	CATGAAATCCACACACGAAAAGTGGA	FE672502.1	-	-	-	-	-	-	-	-	-	-	-	-	-	-	-	-
1605	CATGGAATGGAAGTTCGCCTTGGTCT	FE672978.1	-	-	-	-	-	CX540786	2e-05	0	0	DQ889521	3e-21	Arachis hypogaea clone UU4 unknown mRNA	-	-	-	-
1606	CATGAAGAAAATGTTCATAGAGTGTT	FE672977.1	-	-	-	-	-	-	-	-	-	-	-	-	-	-	-	-
1607	CATGGAGGAACAGCTACTTCAAGTGA	FE672976.1	8e-07	Cicer arietinum partial mRNA for cysteine proteinase (cacG2 gene)	X93220	-	-	-	-	-	-	-	-	-	-	-	-	-
1608	CATGGGCTTTAAGAAAAAAGGAGCAA	FE672974.1	-	-	-	-	-	-	-	-	-	-	-	-	-	-	-	-
1609	CATGGAAGCGATTCTGTTGAAAGTGC	FE672973.1	-	-	-	-	-	-	-	-	-	-	-	-	-	-	-	-
1610	CATGTCCCATCCAGGAAAACCGCCAG	FE672971.1	-	-	-	-	-	-	-	-	-	-	-	-	-	-	-	-
1611	CATGACTTGAGTTTTGCTTGCCATTT	FE672501.1	-	-	-	-	-	-	-	-	-	-	-	-	-	-	-	-
1612	CATGATGTTGTTCTGGCTTGTGTACT	FE672499.1	-	-	-	-	-	-	-	-	-	-	-	-	-	-	-	-
1613	CATGGGGCACCCTACCCACCATTTTG	FE672498.1	-	-	-	-	-	-	-	-	-	-	-	-	-	-	-	-
1615	CATGAAATCATCATTGAACTTTTTGA	FE672493.1	-	-	-	-	-	CX517964	3e-07	0	0	EU165372	3e-60	Glycine max alanine aminotransferase 2 (AlaAT2) mRNA, complete cds	Alanine aminotransferase 2	A8IKE5_SOYBN	-	-
1616	CATGGTGTAGGAGCTGAAATCTGGTT	FE672490.1	-	-	-	-	-	-	-	-	-	-	-	-	-	-	-	-
1617	CATGCCGTTGTCCTTAGTGTAAAAAT	FE672968.1	-	-	-	-	-	EY477685	3e-07	0	0	AF452495	2e-10	Vigna unguiculata aminoimidazole ribonucleotide carboxylase mRNA, complete cds	Aminoimidazole ribonucleotide carboxylase; ( EC=4.1.1.21)	Q8W197_VIGUN	-	-
1618	CATGCATTTTGCTGTCTCACTCTGTA	FE672967.1	-	-	-	-	-	-	-	-	-	-	-	-	-	-	-	-
1619	CATGAAGGTAGTATGTGTAGCTCTAA	FE672964.1	-	-	-	-	-	-	-	-	-	-	-	-	-	-	-	-
1620	CATGTATCCAAATATATAAATAAGTT	FE672959.1	-	-	-	-	-	-	-	-	-	-	-	-	-	-	-	-
1621	CATGAGGAAAGTCAAAAAAGTTCTCC	FE672958.1	-	-	-	-	-	-	-	-	-	-	-	-	-	-	-	-
1623	CATGTAATGAACTCACTTTAAAAGAT	FE672486.1	-	-	-	-	-	-	-	-	-	-	-	-	-	-	-	-
1625	CATGATGGCACCGAAGCAGAAAATTA	FE672483.1	-	-	-	-	-	-	-	-	-	-	-	-	-	-	-	-
1626	CATGAACGTGAGGAGATTCAGGCTGA	FE672482.1	8e-07	Pisum sativum coxVb gene for cytochrome c oxidase subunit Vb, complete cds, note: PscoxVb-3	AB236127	Cytochrome c oxidase subunit Vb	Q0KKQ3_PEA	EY475300	8e-05	1	0	AB236124	0	Pisum sativum coxVb mRNA for cytochrome c oxidase subunit Vb, complete cds, note: PscoxVb-3	Cytochrome c oxidase subunit Vb	Q0KKQ3_PEA	correlated ID	-
1627	CATGGATGAAATCTCGGGAGTATTCG	FE672481.1	-	-	-	-	-	-	-	-	-	-	-	-	-	-	-	-
1628	CATGGCTCTGGAAACGTAGGTCAGTC	FE672480.1	-	-	-	-	-	DW018723	8e-05	1	0	DQ917751	3e-139	Robinia pseudoacacia histone H3 (H3) mRNA, complete cds	Histone H3	Q06AS1_ROBPS	-	-
1629	CATGGTGAAACCTCTCAGTCACTTTC	FE672479.1	-	-	-	-	-	-	-	-	-	-	-	-	-	-	-	-
1630	CATGAATGGTACCTTAAATTCCAAGG	FE672957.1	-	-	-	-	-	-	-	-	-	-	-	-	-	-	-	-
1632	CATGCCTCTCCTGCTGTGTGTATCTT	FE672953.1	-	-	-	-	-	-	-	-	-	-	-	-	-	-	-	-
1635	CATGTACTCTCTCTTTCTCCTCTCTT	FE672949.1	-	-	-	-	-	-	-	-	-	-	-	-	-	-	-	-
1636	CATGAGTTTCCTGAAGGATCACTACG	FE672948.1	-	-	-	-	-	-	-	-	-	-	-	-	-	-	-	-
1637	CATGCAAAAGAGAATCAGAGTTATTA	FE672947.1	-	-	-	-	-	-	-	-	-	-	-	-	-	-	-	-
1639	CATGTAGCAGTATCACACGATGACAT	FE672477.1	-	-	-	-	-	-	-	-	-	-	-	-	-	-	-	-
1640	CATGTAATTTTAAATCATTACAATCA	FE672476.1	-	-	-	-	-	-	-	-	-	-	-	-	-	-	-	-
1641	CATGGTCATAAGTTCCAATTTAAGCT	FE672475.1	-	-	-	-	-	-	-	-	-	-	-	-	-	-	-	-
1642	CATGCGCCGACGTCGTTTTCCCCTTC	FE672473.1	-	-	-	-	-	-	-	-	-	-	-	-	-	-	-	-
1643	CATGCCTTTGAGGATAGCCTCAAATC	FE672472.1	-	-	-	-	-	-	-	-	-	-	-	-	-	-	-	-
1645	CATGGCCGCACCACCTCCCACCAAGG	FE672468.1	-	-	-	-	-	-	-	-	-	-	-	-	-	-	-	-
1646	CATGGCAAAGTACTTTGTTGGAGAGA	FE672467.1	-	-	-	-	-	-	-	-	-	-	-	-	-	-	-	-
1647	CATGGTGGATCGAGGTAACTGCACAT	FE672466.1	-	-	-	-	-	-	-	-	-	-	-	-	-	-	-	-
1648	CATGTGGGAACGTTACTGTCGTGCAG	FE672942.1	-	-	-	-	-	-	-	-	-	-	-	-	-	-	-	-
1649	CATGTGGGCCGGTACGTGCAGGGTTG	FE672941.1	-	-	-	-	-	-	-	-	-	-	-	-	-	-	-	-
1650	CATGGTACGGTCGAGAACGTGTTAAG	FE672939.1	-	-	-	-	-	-	-	-	-	-	-	-	-	-	-	-
1652	CATGTGTTTCTGGCTGTTGGAAGGGT	FE672936.1	-	-	-	-	-	-	-	-	-	-	-	-	-	-	-	-
1653	CATGATGATGACCCTCCACACTCCCA	FE672935.1	-	-	-	-	-	-	-	-	-	-	-	-	-	-	-	-
1654	CATGTCATTCCTCTCAGGCTCTCCAA	FE672934.1	-	-	-	-	-	-	-	-	-	-	-	-	-	-	-	-
1655	CATGTCTGAAATCCTTCTAAATCATC	FE672464.1	-	-	-	-	-	-	-	-	-	-	-	-	-	-	-	-
1656	CATGCAGAGCTGGTTCTTGCTCTTCT	FE672460.1	-	-	-	-	-	-	-	-	-	-	-	-	-	-	-	-
1658	CATGAAATGTGGAGAGTGTCCCGTGT	FE672458.1	-	-	-	-	-	-	-	-	-	-	-	-	-	-	-	-
1661	CATGTGCCAGGACTTACGAGATTGAG	FE672933.1	-	-	-	-	-	-	-	-	-	-	-	-	-	-	-	-
1662	CATGACTGTGCTGTACAGAGTTGTGA	FE672932.1	-	-	-	-	-	-	-	-	-	-	-	-	-	-	-	-
1663	CATGGTGTAGGCCTTCTGGATCGGAT	FE672929.1	-	-	-	-	-	-	-	-	-	-	-	-	-	-	-	-
1664	CATGTCTTCACAGTCTATAAGTTCGT	FE672927.1	-	-	-	-	-	-	-	-	-	-	-	-	-	-	-	-
1665	CATGCGATTTGCACAACCCAGGACAC	FE672925.1	-	-	-	-	-	-	-	-	-	-	-	-	-	-	-	-
1666	CATGTGGGCTTTGTTGGGAGCATTGG	FE672924.1	-	-	-	-	-	-	-	-	-	-	-	-	-	-	-	-
1667	CATGAAATAAAACAAACGAATCATCA	FE672923.1	-	-	-	-	-	-	-	-	-	-	-	-	-	-	-	-
1668	CATGGCTCTATGCTACTCGAAACCAT	FE672922.1	-	-	-	-	-	-	-	-	-	-	-	-	-	-	-	-
1669	CATGTGAGAGCGACTCAAATGAATCA	FE672453.1	-	-	-	-	-	-	-	-	-	-	-	-	-	-	-	-
1671	CATGGTGGTGGTGCATTCTCAGGAAA	FE672451.1	-	-	-	-	-	CA919922	8e-05	1	0	AY560003	0	Medicago sativa S-adenosylmethionine synthase mRNA, complete cds	S-adenosylmethionine synthetase (Fragment); ( EC=2.5.1.6)	Q6J9X6_MEDSA	-	-
1672	CATGAGCCACCCTAACCATTGACCCA	FE672450.1	-	-	-	-	-	-	-	-	-	-	-	-	-	-	-	-
1675	CATGTATGTGTAAAGCTGCCCTTCCC	FE672445.1	-	-	-	-	-	-	-	-	-	-	-	-	-	-	-	-
1677	CATGCAAGGCACAACAAATTGTAGCT	FE671384.1	-	-	-	-	-	-	-	-	-	-	-	-	-	-	-	-
1679	CATGATGAAGACACGACGGACATACA	FE671381.1	-	-	-	-	-	-	-	-	-	-	-	-	-	-	-	-
1681	CATGAAAACGAAGAAAGCACTCGGAG	FE671379.1	1e-05	Arachis hypogaea clone 1L41 high mobility group protein 2 mRNA, complete cds	DQ889548	-	-	EY477158	8e-05	1	0	X76774	1e-135	P.sativum mRNA for HMG1 protein	HMG 1 protein	Q41026_PEA	-	Correlated protein name
1682	CATGTAAGTAACTACATCATTGCATT	FE671376.1	-	-	-	-	-	-	-	-	-	-	-	-	-	-	-	-
1683	CATGTACGTAAATTCTCCAGGAGGAT	FE671375.1	-	-	-	-	-	-	-	-	-	-	-	-	-	-	-	-
1685	CATGGACAATTAATGCTGTGGTCGCA	FE671372.1	-	-	-	-	-	-	-	-	-	-	-	-	-	-	-	-
1686	CATGGAGGAGGATATGTTGGGGAAGC	FE671371.1	8e-07	Cicer arietinum mRNA for glycine-rich protein 2, partial	AJ012829	Glycine-rich protein 2 (Fragment)	Q9ZRV2_CICAR	-	-	-	-	-	-	-	-	-	-	-
1688	CATGAAGAAAGAATAAGTGGTGCACG	FE671369.1	-	-	-	-	-	-	-	-	-	-	-	-	-	-	-	-
1689	CATGGTGTATTTGAGAAACGTGCACC	FE671367.1	-	-	-	-	-	-	-	-	-	-	-	-	-	-	-	-
1690	CATGAAGTACAATAAATAAGAAAAAG	FE671366.1	8e-07	Cicer arietinum hydroxymethyl transferase mRNA, partial cds	AF416481	Hydroxymethyl transferase (Fragment)	Q945F1_CICAR	-	-	-	-	-	-	-	-	-	-	-
1691	CATGGAATCATTGCTGCTTGGTGTTA	FE671365.1	-	-	-	-	-	CX530179	8e-05	1	0	AF369889	0	Pisum sativum embryo-abundant protein EMB mRNA, complete cds	Embryo-abundant protein EMB	Q8S4X0_PEA	-	-
1692	CATGGGAAAGTATAGAATCAGTGAGG	FE671364.1	-	-	-	-	-	-	-	-	-	-	-	-	-	-	-	-
1693	CATGGAATTGAAGTGGCTGTGGAGTT	FE671363.1	-	-	-	-	-	-	-	-	-	-	-	-	-	-	-	-
1694	CATGACATTAATTTGGCTGTAGCAGG	FE671362.1	-	-	-	-	-	-	-	-	-	-	-	-	-	-	-	-
1695	CATGCTGGACATTCAGCACAACTGGA	FE671361.1	8e-07	Medicago sativa cysteine protease (CP1) mRNA, complete cds	DQ492683	Cysteine protease; ( EC=3	Q1KK73_MEDSA	CX535012	3e-07	0	0	DQ492683	0	Medicago sativa cysteine protease (CP1) mRNA, complete cds	Cysteine protease; ( EC=3.4.22.2)	Q1KK73_MEDSA	correlated ID	-
1696	CATGAAGTCCGCAGCATCTGGATATC	FE671360.1	8e-07	Cicer arietinum mRNA for catalase	AJ131046	Catalase (Fragment); ( EC=1	Q9ZRU4_CICAR	-	-	-	-	-	-	-	-	-	-	-
1698	CATGCCAAGCGTGTAACAATTATGCC	FE671356.1	-	-	-	-	-	-	-	-	-	-	-	-	-	-	-	-
1699	CATGAGTTTGGCAATATGAAGTTAAT	FE671355.1	-	-	-	-	-	-	-	-	-	-	-	-	-	-	-	-
1700	CATGACTCCAGCAGTTATTCCAGCAC	FE671353.1	-	-	-	-	-	-	-	-	-	-	-	-	-	-	-	-
1701	CATGTGTGACCTGTATATTTGTGTTG	FE671352.1	-	-	-	-	-	-	-	-	-	-	-	-	-	-	-	-
1703	CATGAGACCCTTGAGCATTATGACCA	FE671350.1	-	-	-	-	-	-	-	-	-	-	-	-	-	-	-	-
1704	CATGCTCAAAACGCTTGTGGTGTGTC	FE671349.1	-	-	-	-	-	-	-	-	-	-	-	-	-	-	-	-
1705	CATGGTCGTTCTCTTCTCACCTTGCG	FE671348.1	-	-	-	-	-	-	-	-	-	-	-	-	-	-	-	-
1706	CATGCATTCCAAATCTATCGAGAAGC	FE671347.1	-	-	-	-	-	-	-	-	-	-	-	-	-	-	-	-
1707	CATGGCATACTTCTGAGTCCAGCTGC	FE671346.1	8e-07	Pisum sativum ubiquitin conjugating enzyme E2 mRNA, partial cds	AY702916	Ubiquitin conjugating enzyme E2 (Fragment); ( EC=6	Q64FZ8_PEA	CX532229	8e-05	1	0	DQ887085	7e-146	Arachis hypogaea ubiquitin carrier-like protein mRNA, complete cds	Ubiquitin carrier protein; ( EC=6.3.2.-)	Q06H23_ARAHY	no	Correlated protein name (partial)
1708	CATGAATTTTTTATTTCTTATCACTG	FE671344.1	-	-	-	-	-	-	-	-	-	-	-	-	-	-	-	-
1709	CATGTCGGCCAAGATAGCATTGGGAA	FE671343.1	-	-	-	-	-	-	-	-	-	-	-	-	-	-	-	-
1710	CATGTGAAGGATGTGTTGGAGCAGTG	FE671342.1	-	-	-	-	-	CX531124	8e-05	0	0	AF198627	5e-26	Glycine max copper chaperone homolog CCH mRNA, complete cds	Copper chaperone homolog CCH	Q9SE03_SOYBN	-	-
1711	CATGATCACTTCACAGAAACTTATTA	FE671341.1	-	-	-	-	-	-	-	-	-	-	-	-	-	-	-	-
1712	CATGGCACTTCTTTCTATCGAAAATA	FE671340.1	-	-	-	-	-	-	-	-	-	-	-	-	-	-	-	-
1713	CATGCAGGGCTGTACAATAGCAGATA	FE671339.1	-	-	-	-	-	BQ154633	8e-05	1	0	L20806	2e-90	Glycine max seed maturation protein (GmPM3) mRNA, complete cds	PGmPM3	Q39872_SOYBN	-	-
1714	CATGGCTATGATGGCAGTGATAATCA	FE671338.1	-	-	-	-	-	-	-	-	-	-	-	-	-	-	-	-
1717	CATGGAGCCCTACTCCAAGAAGGTCT	FE671334.1	-	-	-	-	-	-	-	-	-	-	-	-	-	-	-	-
1721	CATGTGTGAAACCACCTGCACCTGCT	FE671329.1	-	-	-	-	-	-	-	-	-	-	-	-	-	-	-	-
1722	CATGCCTTCTTCCTCTTCGCAGAGAC	FE671326.1	-	-	-	-	-	-	-	-	-	-	-	-	-	-	-	-
1724	CATGAACACCAAAACACAACAACAAA	FE671324.1	-	-	-	-	-	-	-	-	-	-	-	-	-	-	-	-
1727	CATGATGTGATTAGGGTGAACGAGAT	FE671320.1	-	-	-	-	-	-	-	-	-	-	-	-	-	-	-	-
1728	CATGATGACCCGGCCCAAAAAGGCTC	FE671318.1	-	-	-	-	-	-	-	-	-	-	-	-	-	-	-	-
1729	CATGAACAGAAAAAGGGACATAGCAG	FE671317.1	-	-	-	-	-	-	-	-	-	-	-	-	-	-	-	-
1730	CATGCTGAACATTTGATCATTCAACA	FE671316.1	-	-	-	-	-	-	-	-	-	-	-	-	-	-	-	-
1731	CATGGAATCGAGAGCTCCAAGTGGGC	FE671315.1	8e-07	Glycyrrhiza uralensis 26S ribosomal RNA, partial sequence	EF571299	-	-	-	-	-	-	-	-	-	-	-	-	-
1732	CATGGAATTAGTGCTTGATACGAATA	FE671314.1	-	-	-	-	-	-	-	-	-	-	-	-	-	-	-	-
1733	CATGGGGAGAAAATCTCACCTTCTAC	FE671313.1	-	-	-	-	-	-	-	-	-	-	-	-	-	-	-	-
1734	CATGCGAATAACCTGTGTGCGAATAT	FE671311.1	-	Pisum sativum (clone pCLp) nuclear encoded precursor to chloroplast protein mRNA, complete cds	L09547	ATP-dependent Clp protease ATP-binding subunit clpC homolog, chloroplastic precursor	CLPC_PEA	BF636041	3e-07	0	0	L09547	0	Pisum sativum (clone pCLp) nuclear encoded precursor to chloroplast protein mRNA, complete cds	ATP-dependent Clp protease ATP-binding subunit clpC homolog, chloroplastic precursor	CLPC_PEA	-	-
1735	CATGCGCATCAATTCCCATTTCCTCG	FE671310.1	-	-	-	-	-	-	-	-	-	-	-	-	-	-	-	-
1737	CATGGAAACCTCAGCTCTTGAGGCTT	FE671308.1	-	-	-	-	-	-	-	-	-	-	-	-	-	-	-	-
1740	CATGGTTCCCCTTCCTTGTAGACTTG	FE671303.1	-	-	-	-	-	-	-	-	-	-	-	-	-	-	-	-
1742	CATGTTGCGGAGGTGAGTCCTCACTG	FE671299.1	-	-	-	-	-	-	-	-	-	-	-	-	-	-	-	-
1743	CATGCTTAGCAATTCCAGCCAGGTTG	FE671295.1	8e-07	Sesbania rostrata cDNA-AFLP fragment 022BT24M13-328.8 mRNA sequence	EF415873	-	-	-	-	-	-	-	-	-	-	-	-	-
1747	CATGCTACCTTTGATGTAACAAAACC	FE670995.1	-	-	-	-	-	-	-	-	-	-	-	-	-	-	-	-
1748	CATGGTAGGTGGGCTATGCTTGCTAC	FE670994.1	-	-	-	-	-	EV262530	3e-07	0	0	AF139466	1e-61	Vigna radiata chlorophyll a/b binding protein CP29 (CipCp29) mRNA, complete cds; nuclear gene for chloroplast product	Chlorophyll a/b binding protein CP29	Q9XQB2_PHAAU	-	-
1751	CATGCACGCATTCGGAAAAATCAAGG	FE670991.1	-	-	-	-	-	-	-	-	-	-	-	-	-	-	-	-
1753	CATGCCATTCTCATCCCAATCGTGGC	FE670989.1	-	-	-	-	-	-	-	-	-	-	-	-	-	-	-	-
1754	CATGACATTCAAAAATCAACAATCTT	FE670988.1	-	-	-	-	-	-	-	-	-	-	-	-	-	-	-	-
1755	CATGACACAACAACGCAGCACCAACG	FE670987.1	-	-	-	-	-	-	-	-	-	-	-	-	-	-	-	-
1757	CATGTTCTTCCCCCAGTGGCCACCTT	FE670985.1	-	-	-	-	-	-	-	-	-	-	-	-	-	-	-	-
1759	CATGTTGATTCCACCTATGATCAATA	FE670980.1	-	-	-	-	-	-	-	-	-	-	-	-	-	-	-	-
1761	CATGTGGTTGTAACATTCTCAATGTG	FE670976.1	-	-	-	-	-	-	-	-	-	-	-	-	-	-	-	-
1762	CATGAGACTGTTACTGTGATGTTGGC	FE670975.1	-	-	-	-	-	-	-	-	-	-	-	-	-	-	-	-
1764	CATGGCTTCGAGAAGAACCTCAACTC	FE670973.1	-	-	-	-	-	-	-	-	-	-	-	-	-	-	-	-
1767	CATGGCGGCGACGTTGGTTCGTACTC	FE670967.1	-	-	-	-	-	-	-	-	-	-	-	-	-	-	-	-
1768	CATGTTACTAGCTTGATATTTTAAAT	FE670966.1	-	-	-	-	-	-	-	-	-	-	-	-	-	-	-	-
1769	CATGAAACTAAGAGAGGTTTACAATG	FE670965.1	-	-	-	-	-	-	-	-	-	-	-	-	-	-	-	-
1771	CATGGACTAAAATTGAAGGCTATCAA	FE670962.1	-	-	-	-	-	-	-	-	-	-	-	-	-	-	-	-
1772	CATGTTGTGATTTCACCTTTGCTTTT	FE670961.1	-	-	-	-	-	-	-	-	-	-	-	-	-	-	-	-
1775	CATGTCATCATTGAGACAAACCGAAC	FE670958.1	8e-07	Trifolium repens mRNA for putative desaturase-like protein (zip gene)	AM282585	Putative desaturase-like protein	Q17UU7_TRIRP	-	-	-	-	-	-	-	-	-	-	-
1777	CATGAAACCGTAAGCTCCCAAGCAGT	FE670954.1	-	-	-	-	-	EX530140	3e-07	0	0	X55033	0	P.sativum chloroplast DNA of the single ribosomal RNA operon	-	-	-	-
1778	CATGTGGAAGTTTTGGCCACATTATT	FE670953.1	-	-	-	-	-	-	-	-	-	-	-	-	-	-	-	-
1779	CATGTACAAGGTTTGGGTTTCCTAAA	FE670952.1	-	-	-	-	-	-	-	-	-	-	-	-	-	-	-	-
1782	CATGGCTCGACGATCTAACCGATGAC	FE670948.1	-	-	-	-	-	-	-	-	-	-	-	-	-	-	-	-
1783	CATGATTTGACACTATTATTCCAGCT	FE670946.1	-	-	-	-	-	-	-	-	-	-	-	-	-	-	-	-
1785	CATGTAAGCTATGTAAAAATGCGAGG	FE670944.1	-	-	-	-	-	-	-	-	-	-	-	-	-	-	-	-
1786	CATGCTTTTGCTTTTTTCTCAGAAAC	FE670943.1	-	-	-	-	-	-	-	-	-	-	-	-	-	-	-	-
1788	CATGAACATATCCTGCAACGGGGACA	FE670941.1	-	-	-	-	-	-	-	-	-	-	-	-	-	-	-	-
1789	CATGTCCCTCAAAAACTCCATACAGC	FE670939.1	-	-	-	-	-	-	-	-	-	-	-	-	-	-	-	-
1794	CATGATACTTTTCAGAAAGCCCGCCA	FE670931.1	-	-	-	-	-	-	-	-	-	-	-	-	-	-	-	-
1795	CATGAGATCACTGTTACTGGAAATAA	FE670929.1	-	-	-	-	-	BI307920	8e-05	1	0	AF188678	0	Pisum sativum P72 DEAD box protein mRNA, complete cds	P72 DEAD box protein	Q9SP26_PEA	-	-
1800	CATGTAATTACATTGGTGAAAATGGG	FE670924.1	-	-	-	-	-	-	-	-	-	-	-	-	-	-	-	-
1802	CATGCTTTTGGTAATGAAATCTTAGC	FE670921.1	-	-	-	-	-	-	-	-	-	-	-	-	-	-	-	-
1803	CATGGTGATTGTTATGGTGAGCACAC	FE670920.1	8e-07	Cicer arietinum mRNA for catalase	AJ131046	Catalase (Fragment); ( EC=1	Q9ZRU4_CICAR	CX520443	8e-05	1	0	AY424953	0	Lotus japonicus catalase (cat1) gene, complete cds, alternatively spliced	-	-	-	Correlated protein name
1807	CATGCAAAGAATCAAAACAATTCGCG	FE670913.1	-	-	-	-	-	-	-	-	-	-	-	-	-	-	-	-
1808	CATGAATTAGTCGATTCCGCCGCCGC	FE670912.1	-	-	-	-	-	-	-	-	-	-	-	-	-	-	-	-
1809	CATGCTAAACCGAAGAGTGAACAGGC	FE670911.1	-	-	-	-	-	-	-	-	-	-	-	-	-	-	-	-
1811	CATGGGTTAGTCGATCCTAAGGGACG	FE670908.1	8e-07	Robinia pseudoacacia 26S ribosomal RNA gene, partial sequence	EU340885	-	-	CB891296	3e-07	0	0	EF571299	0	Glycyrrhiza uralensis 26S ribosomal RNA, partial sequence	-	-	-	Correlated RNA description
1812	CATGGATCAGCCAAGTGAGTAGCCAA	FE670907.1	-	-	-	-	-	-	-	-	-	-	-	-	-	-	-	-
1813	CATGCATAGTTGTTGACAGGGTCAAA	FE670906.1	-	-	-	-	-	-	-	-	-	-	-	-	-	-	-	-
1815	CATGGTGGTAAGGATATCTATCTAGG	FE670904.1	-	-	-	-	-	-	-	-	-	-	-	-	-	-	-	-
1816	CATGCTTGGTCTTGATGCTGCTGGAA	FE670903.1	-	-	-	-	-	CA922382	2e-05	0	0	EF623858	2e-56	Glycine max cultivar Williams 82 clone 28O17, complete sequence	-	-	-	-
1818	CATGCACTTAGACCTTTCCTCTCTTG	FE670901.1	-	-	-	-	-	EV260500	5e-06	0	0	AF279251	3e-173	Vigna radiata NADPH-protochlorophyllide oxidoreductase (CipPor) mRNA, complete cds; nuclear gene for chloroplast product	NADPH-protochlorophyllide oxidoreductase	Q9LKH8_PHAAU	-	-
1819	CATGAAGGGGGTGGGCTTTCAATGGC	FE670900.1	-	-	-	-	-	-	-	-	-	-	-	-	-	-	-	-
1820	CATGTGAAGAGTAGAGAAGAAGGCGA	FE670898.1	-	-	-	-	-	-	-	-	-	-	-	-	-	-	-	-
1821	CATGTCAATTCCATTACATAATCAAT	FE670897.1	-	-	-	-	-	-	-	-	-	-	-	-	-	-	-	-
1822	CATGTAATCAAGGAGCAGAATATGTA	FE670896.1	-	-	-	-	-	-	-	-	-	-	-	-	-	-	-	-
1823	CATGGAACTATTGGGATGTTTGCCGG	FE670521.1	-	-	-	-	-	-	-	-	-	-	-	-	-	-	-	-
1824	CATGACTAAACAACACGCTAATTGGT	FE670520.1	-	-	-	-	-	-	-	-	-	-	-	-	-	-	-	-
1825	CATGTCCAGGATCAGCAAGGTGAGCA	FE670519.1	-	-	-	-	-	CX539321	8e-05	1	0	X81962	0	P.sativum mRNA for type II chlorophyll a/b binding protein	Type II chlorophyll a/b binding protein from photosystem I precursor	Q41038_PEA	-	-
1828	CATGAAATATTTCTCCATTTGACGCC	FE670514.1	-	-	-	-	-	-	-	-	-	-	-	-	-	-	-	-
1830	CATGAATTTCAGCTCTCCAATTATTT	FE670512.1	-	-	-	-	-	-	-	-	-	-	-	-	-	-	-	-
1832	CATGCGTTTGCTCTCTTTGTTGCTGT	FE670892.1	-	-	-	-	-	-	-	-	-	-	-	-	-	-	-	-
1833	CATGGAAGAGTGGAATGAGAATAGGG	FE670891.1	-	-	-	-	-	-	-	-	-	-	-	-	-	-	-	-
1834	CATGGGATTTGGAAGCTTGAAGGACT	FE670887.1	-	-	-	-	-	-	-	-	-	-	-	-	-	-	-	-
1835	CATGGAACCTTTCCCCTCTTCGGCCT	FE670886.1	8e-07	Glycyrrhiza uralensis 26S ribosomal RNA, partial sequence	EF571299	-	-	CX524984	3e-07	0	0	EF571299	0	Glycyrrhiza uralensis 26S ribosomal RNA, partial sequence	-	-	-	Correlated RNA description
1836	CATGGAAACAACCATCAACTTTATCC	FE670883.1	-	-	-	-	-	EY476483	3e-07	0	0	AY843524	4e-138	Ammopiptanthus mongolicus clone B54 cold-induced mRNA	-	-	-	-
1839	CATGGACTCAATGTCAACCTTGTGCT	FE670506.1	-	-	-	-	-	BQ139305	8e-05	0	0	AC186736	5e-11	Glycine max clone gmp1-63m15, complete sequence	-	-	-	-
1840	CATGATTTATGTAACACAAAAAGATA	FE670505.1	-	-	-	-	-	-	-	-	-	-	-	-	-	-	-	-
1841	CATGAAGCTGATTCATCCACCGTTAC	FE670504.1	-	-	-	-	-	-	-	-	-	-	-	-	-	-	-	-
1843	CATGGATAGATCACCCAGGTTCGGGT	FE670501.1	-	-	-	-	-	BI263606	3e-07	0	0	X55033	0	P.sativum chloroplast DNA of the single ribosomal RNA operon	-	-	-	-
1844	CATGCATACCAAAAGGATTTGTGCCT	FE670500.1	-	-	-	-	-	-	-	-	-	-	-	-	-	-	-	-
1845	CATGGTACACTGCTGGAGAGCAAGAG	FE670499.1	-	-	-	-	-	CX522765	3e-07	0	0	X81962	0	P.sativum mRNA for type II chlorophyll a/b binding protein	Type II chlorophyll a/b binding protein from photosystem I precursor	Q41038_PEA	-	-
1846	CATGTCATAAAAAGTAAACATAATAC	FE670881.1	-	-	-	-	-	-	-	-	-	-	-	-	-	-	-	-
1848	CATGAGAAACCAAAGTAGCCGTAGCC	FE670875.1	-	-	-	-	-	-	-	-	-	-	-	-	-	-	-	-
1857	CATGACGATATTTTGATGTCAACTTG	FE670490.1	-	-	-	-	-	-	-	-	-	-	-	-	-	-	-	-
1859	CATGTCTTCGAGGCTGATATAGTCTT	FE670487.1	-	-	-	-	-	-	-	-	-	-	-	-	-	-	-	-
1860	CATGCCATAACTTGAATTTGCGACAG	FE670486.1	-	-	-	-	-	-	-	-	-	-	-	-	-	-	-	-
1861	CATGGATCCCTGGTGTTAGAGGGGGT	FE670869.1	-	-	-	-	-	-	-	-	-	-	-	-	-	-	-	-
1862	CATGGCTGGTTTCCCAGTTAGAAAGG	FE670868.1	8e-07	Cicer arietinum mRNA for ribulose 1,5-bisphosphate carboxylase small subunit	AJ131050	Ribulose 1,5-bisphosphate carboxylase small subunit precursor; ( EC=4	Q9ZP07_CICAR	-	-	-	-	-	-	-	-	-	-	-
1863	CATGAGGTGAAATGGAAAGGGAATTA	FE670867.1	-	-	-	-	-	-	-	-	-	-	-	-	-	-	-	-
1866	CATGAATTTCCGTGGGATGCAACTTA	FE670863.1	-	-	-	-	-	-	-	-	-	-	-	-	-	-	-	-
1867	CATGGAGGCCAGTTGTTATGCAAAAT	FE670858.1	-	-	-	-	-	-	-	-	-	-	-	-	-	-	-	-
1868	CATGCCCTTGTTTCTTCACATCACCT	FE670485.1	-	-	-	-	-	-	-	-	-	-	-	-	-	-	-	-
1869	CATGGATCTCACCTTTAGCAAATTGA	FE670484.1	-	-	-	-	-	-	-	-	-	-	-	-	-	-	-	-
1871	CATGACACTGGCAACTCCTACTTTCT	FE670482.1	-	-	-	-	-	-	-	-	-	-	-	-	-	-	-	-
1874	CATGACCTTGCCCAACATTAAGGTTC	FE670478.1	-	-	-	-	-	-	-	-	-	-	-	-	-	-	-	-
1875	CATGAATCTCTGCTCCAAATGTTACG	FE670477.1	-	-	-	-	-	-	-	-	-	-	-	-	-	-	-	-
1876	CATGCATTGCTGCTACTCCAATTGAA	FE670476.1	-	-	-	-	-	-	-	-	-	-	-	-	-	-	-	-
1878	CATGTGTGATAACTAAGACTGATGGG	FE670474.1	-	-	-	-	-	-	-	-	-	-	-	-	-	-	-	-
1879	CATGCGAACCATACGATCAGGTATCT	FE670857.1	-	-	-	-	-	-	-	-	-	-	-	-	-	-	-	-
1880	CATGATTATTAGACTTCTTGTTAAAA	FE670856.1	-	-	-	-	-	-	-	-	-	-	-	-	-	-	-	-
1881	CATGAAGGAAACTTTTACTTGATTTT	FE670850.1	-	-	-	-	-	-	-	-	-	-	-	-	-	-	-	-
1882	CATGGCCACCACCGCAACAGCCGCTG	FE670849.1	-	-	-	-	-	-	-	-	-	-	-	-	-	-	-	-
1883	CATGTAACTCTAAGGATATATTCATC	FE670848.1	-	-	-	-	-	-	-	-	-	-	-	-	-	-	-	-
1884	CATGACAAATGGGAGAAAATAAATGA	FE670847.1	-	-	-	-	-	-	-	-	-	-	-	-	-	-	-	-
1891	CATGGCTATTGGTATTGTTGGTGATG	FE670466.1	8e-07	Phaseolus vulgaris SCAR-RADP fragment SG14	AJ879499	-	-	-	-	-	-	-	-	-	-	-	-	-
1895	CATGATGCTGGGAAGAGGAGGAACGT	FE670842.1	-	-	-	-	-	-	-	-	-	-	-	-	-	-	-	-
1897	CATGGATTTGAGAACAACAAATGGAG	FE670838.1	-	-	-	-	-	-	-	-	-	-	-	-	-	-	-	-
1899	CATGCTATGCCAGCTATTTTCGTGGG	FE670835.1	-	-	-	-	-	-	-	-	-	-	-	-	-	-	-	-
1900	CATGGTTCGTCTAATGGTGCACGCGT	FE670461.1	-	-	-	-	-	-	-	-	-	-	-	-	-	-	-	-
1901	CATGCTCAAGGTATCCTTGCTATATG	FE670460.1	-	-	-	-	-	-	-	-	-	-	-	-	-	-	-	-
1903	CATGAATCACAACATATCTTCCTTTC	FE670458.1	-	-	-	-	-	-	-	-	-	-	-	-	-	-	-	-
1904	CATGGTTCCTCCTCTGAGCCTCAACA	FE670457.1	-	-	-	-	-	-	-	-	-	-	-	-	-	-	-	-
1906	CATGTTTCAACAGCAGCAGCAGCAAA	FE670455.1	-	-	-	-	-	-	-	-	-	-	-	-	-	-	-	-
1907	CATGAAGTACATTTCAATCGTAAGGA	FE670454.1	-	-	-	-	-	-	-	-	-	-	-	-	-	-	-	-
1910	CATGCCCGCTTCGGTAATAAATGGGC	FE670451.1	-	-	-	-	-	-	-	-	-	-	-	-	-	-	-	-
1911	CATGTGTTTCGGACAAGAAATGTTAG	FE670450.1	-	-	-	-	-	-	-	-	-	-	-	-	-	-	-	-
1913	CATGTAATTCTTGAGGTCGACAGGGG	FE670832.1	-	-	-	-	-	-	-	-	-	-	-	-	-	-	-	-
1916	CATGTNGTTCAGTGATATCATTCAAG	FE670829.1	-	-	-	-	-	-	-	-	-	-	-	-	-	-	-	-
1917	CATGATGTGTGTGGAGGGTANAAAAG	FE670826.1	-	-	-	-	-	-	-	-	-	-	-	-	-	-	-	-
1918	CATGTCCAGTGAAGTAGCCTGCCAAG	FE670824.1	-	-	-	-	-	-	-	-	-	-	-	-	-	-	-	-
1920	CATGTTATCCAGTGGGTACGAAGGTG	FE670822.1	-	-	-	-	-	-	-	-	-	-	-	-	-	-	-	-
1922	CATGGTCCAGTTTCCCTCCGGAATGT	FE670447.1	-	-	-	-	-	-	-	-	-	-	-	-	-	-	-	-
1923	CATGATCCTACTACGCCGAACCGACA	FE670446.1	-	-	-	-	-	-	-	-	-	-	-	-	-	-	-	-
1925	CATGAACTTAGTTTGACCACTGGAAA	FE670443.1	-	-	-	-	-	CA923116	8e-05	1	0	AF056621	0	Medicago sativa putative Cu/Zn superoxide dismutase precursor, mRNA, nuclear gene encoding chloroplast protein, complete cds	Superoxide dismutase [Cu-Zn], chloroplastic precursor; ( EC=1.15.1.1)	SODCP_MEDSA	-	-
1928	CATGTAATTCGACCGTTGTTCCTTCC	FE670440.1	-	-	-	-	-	-	-	-	-	-	-	-	-	-	-	-
1929	CATGAGATCAATGCACTTGAGCAGCA	FE670439.1	-	-	-	-	-	CX530572	3e-07	0	0	U31565	0	Pisum sativum reversibly glycosylatable polypeptide (RGP1) mRNA, complete cds	Alpha-1,4-glucan-protein synthase [UDP-forming]; ( EC=2.4.1.-; AltName	UPTG_PEA	-	-
1930	CATGAATAAAAATATAAATAAATAAA	FE670819.1	-	-	-	-	-	-	-	-	-	-	-	-	-	-	-	-
1931	CATGAAGACACATCATACTTAAGATC	FE670818.1	-	-	-	-	-	-	-	-	-	-	-	-	-	-	-	-
1933	CATGATTTCCTAATCTGTCATCTGTC	FE670436.1	-	-	-	-	-	-	-	-	-	-	-	-	-	-	-	-
1934	CATGAAGTTGGTGCAGGTGTGTTGCA	FE670435.1	-	-	-	-	-	-	-	-	-	-	-	-	-	-	-	-
1935	CATGTCAAATTTCAAACACTAGCCAT	FE670434.1	-	-	-	-	-	-	-	-	-	-	-	-	-	-	-	-
1939	CATGTGATTACGTAGAATTCTTCAAC	FE670426.1	-	-	-	-	-	-	-	-	-	-	-	-	-	-	-	-
1941	CATGAAACTCCAAAGGAAAATGTTGC	FE670147.1	-	-	-	-	-	-	-	-	-	-	-	-	-	-	-	-
1942	CATGATGAAGCTGAATCTCTTTATGT	FE670145.1	-	-	-	-	-	-	-	-	-	-	-	-	-	-	-	-
1943	CATGTAAGGCATCGACAATGATCCTT	FE670144.1	8e-07	Trifolium pratense isolate M3 18S ribosomal RNA gene, partial sequence; internal transcribed spacer 1, 5.8S ribosomal RNA gene, and internal transcribed spacer 2, complete sequence; and 26S ribosomal RNA gene, partial sequence	EU348780	-	-	CX532101	3e-07	0	0	X17535	0	V.faba 5.8S, 18S and 25S ribosomal RNA genes and ITS regions	-	-	-	Correlated RNA description
1944	CATGCTTGAAGGAAGAATAAGCATTC	FE670138.1	-	-	-	-	-	-	-	-	-	-	-	-	-	-	-	-
1945	CATGATGACCACCATCTATTTTAATA	FE670137.1	-	-	-	-	-	-	-	-	-	-	-	-	-	-	-	-
1946	CATGTTACAACTTTGTTCCTCGTCTA	FE670136.1	-	-	-	-	-	-	-	-	-	-	-	-	-	-	-	-
1947	CATGCATTGTTGTTAACAGGGTCAAA	FE670135.1	-	-	-	-	-	-	-	-	-	-	-	-	-	-	-	-
1950	CATGGATCCTCCTCAGATCTGTCAAC	FE670132.1	-	-	-	-	-	-	-	-	-	-	-	-	-	-	-	-
1952	CATGATCCTAGAGTACAAGTGAAGCA	FE670127.1	1e-05	Glycine max myo-inositol-1-phosphate synthase (MIPS3) gene, complete cds	DQ323907	Myo-inositol-1-phosphate synthase	Q2MJR4_SOYBN	-	-	-	-	-	-	-	-	-	-	-
1953	CATGGTGAACATATCTTTCCCAACTT	FE670126.1	-	-	-	-	-	-	-	-	-	-	-	-	-	-	-	-
1955	CATGGTCAAGAAACTTATCCGCAATG	FE670123.1	-	-	-	-	-	-	-	-	-	-	-	-	-	-	-	-
1956	CATGCGTCGTACTGTGAAGAGTACTC	FE670122.1	-	-	-	-	-	CX527823	8e-05	0	0	AY845254	0	Pisum sativum light-harvesting chlorophyll-a/b binding protein Lhcb2 mRNA, complete cds	Chlorophyll a-b binding protein 215, chloroplastic precursor; (AltName	CB215_PEA	-	-
1957	CATGAGTTACCCTCACAACCATAGGC	FE670121.1	-	-	-	-	-	-	-	-	-	-	-	-	-	-	-	-
1958	CATGCACCTTTTAGTTTGTTTCGGAG	FE670120.1	8e-07	Arachis hypogaea cultivar JL24 16S ribosomal RNA gene, partial sequence; mitochondrial	EU982414	-	-	ES408309	8e-05	1	0	X00835	0	Soybean mitochondrial gene for 18S rRNA 3'region and 5S rRNA	-	-	-	Uncorrelated annotation
1959	CATGACCGTTTTGTGGATGCCATTAC	FE670118.1	-	-	-	-	-	-	-	-	-	-	-	-	-	-	-	-
1961	CATGTTGTATTGCCAAAACAGAAAAA	FE670116.1	-	-	-	-	-	-	-	-	-	-	-	-	-	-	-	-
1962	CATGTGCATCTTCATCAACTTCAACC	FE670115.1	-	-	-	-	-	-	-	-	-	-	-	-	-	-	-	-
1967	CATGGGAAAAGTACCTTTCTCTAACT	FE670109.1	-	-	-	-	-	-	-	-	-	-	-	-	-	-	-	-
1968	CATGCATAAAGGATTCTGATTTCAAG	FE670106.1	-	-	-	-	-	-	-	-	-	-	-	-	-	-	-	-
1969	CATGGCTAAGGGTCCAGGTCTCTACA	FE670105.1	-	-	-	-	-	-	-	-	-	-	-	-	-	-	-	-
1970	CATGCAGAGTCTTTTCACATTATCAT	FE670104.1	-	-	-	-	-	-	-	-	-	-	-	-	-	-	-	-
1974	CATGGTTATATTATTTATTATGTCTA	FE670099.1	-	-	-	-	-	-	-	-	-	-	-	-	-	-	-	-
1975	CATGGCATTTACTTCCCTTGGGCTCG	FE670098.1	-	-	-	-	-	-	-	-	-	-	-	-	-	-	-	-
1977	CATGGGCTCTGTATGTTCGACGTCTT	FE670095.1	-	-	-	-	-	-	-	-	-	-	-	-	-	-	-	-
1978	CATGCACCAATGTCAATTGCAATTGT	FE670093.1	-	-	-	-	-	-	-	-	-	-	-	-	-	-	-	-
1979	CATGTCCGAACCAATCAGGCGAAGTG	FE670091.1	-	-	-	-	-	-	-	-	-	-	-	-	-	-	-	-
1980	CATGGCGACACCACACGGTCTAGTTG	FE670089.1	-	-	-	-	-	-	-	-	-	-	-	-	-	-	-	-
1983	CATGTTCTTCTTTGCGACTTATTTGA	FE670086.1	-	-	-	-	-	-	-	-	-	-	-	-	-	-	-	-
1984	CATGGTGTCTAGTATCGCATCCTAGA	FE670085.1	-	-	-	-	-	-	-	-	-	-	-	-	-	-	-	-
1987	CATGCGTTCGCACCCTAGGGCAAAAT	FE670082.1	-	-	-	-	-	-	-	-	-	-	-	-	-	-	-	-
1988	CATGTTGGGAGATTCCAACCGCTTAT	FE670081.1	-	-	-	-	-	-	-	-	-	-	-	-	-	-	-	-
1989	CATGGCTGCAAAGTATTGCAAGGAAA	FE670078.1	-	-	-	-	-	-	-	-	-	-	-	-	-	-	-	-
1990	CATGGATTTGCTCACTCCACAAGCTG	FE670076.1	-	-	-	-	-	-	-	-	-	-	-	-	-	-	-	-
1991	CATGCTTTTGGATGGATGGTAAAAAT	FE670074.1	-	-	-	-	-	-	-	-	-	-	-	-	-	-	-	-
1992	CATGGGTGTGATGAGACCGGACCTGG	FE670073.1	-	-	-	-	-	-	-	-	-	-	-	-	-	-	-	-
1994	CATGAGTGCCATTTCCAACACAAACA	FE670071.1	-	-	-	-	-	-	-	-	-	-	-	-	-	-	-	-
1996	CATGGATACCAATAAAAGTAGGGAGG	FE670067.1	-	-	-	-	-	-	-	-	-	-	-	-	-	-	-	-
1997	CATGACGGCAAAAGAAAATGCGAGAC	FE670066.1	-	-	-	-	-	-	-	-	-	-	-	-	-	-	-	-
1998	CATGGCTAATCTAGCGTTCTTAAGTT	FE670065.1	-	-	-	-	-	-	-	-	-	-	-	-	-	-	-	-
2002	CATGCACGACAGCGACCGTTACGATC	FE670058.1	-	-	-	-	-	CX527852	1e-06	0	0	AF186020	0	Vicia faba abscisic acid-activated protein kinase (AAPK) mRNA, complete cds	Abscisic acid-activated protein kinase	Q9M6N2_VICFA	-	-
2003	CATGGGTGTCAAAGGTTTTGTTGAAA	FE670057.1	-	-	-	-	-	-	-	-	-	-	-	-	-	-	-	-
2005	CATGCGACGAGTGGGCTTGATGTGAC	FE669765.1	-	-	-	-	-	-	-	-	-	-	-	-	-	-	-	-
2006	CATGAAGTTCCTGATCCAACGGCTGT	FE669764.1	-	-	-	-	-	-	-	-	-	-	-	-	-	-	-	-
2007	CATGTCGATTGCAAAGCCGCGCTCCG	FE669763.1	-	-	-	-	-	-	-	-	-	-	-	-	-	-	-	-
2008	CATGACAAGTAGTATAGGAGATTGAC	FE669762.1	-	-	-	-	-	-	-	-	-	-	-	-	-	-	-	-
2009	CATGAGTAAGGAAGGTCAATGTTTTC	FE669759.1	-	-	-	-	-	-	-	-	-	-	-	-	-	-	-	-
2012	CATGAAGGAGTCAAATCAGTCTTGTA	FE669754.1	-	-	-	-	-	-	-	-	-	-	-	-	-	-	-	-
2015	CATGGTATGGTCCAGACAGAGTAAAA	FE669750.1	-	-	-	-	-	-	-	-	-	-	-	-	-	-	-	-
2019	CATGATTGCCACTTAAGAATTTTTCA	FE669745.1	-	-	-	-	-	-	-	-	-	-	-	-	-	-	-	-
2020	CATGTGCAGCTTGATCCACACTTGCA	FE669744.1	8e-07	C.arietinum mRNA for metallothionein (clone: CanMT-1)	X95708	Metallothionein-like protein 1; ( Short=MT-1)	MT1_CICAR	-	-	-	-	-	-	-	-	-	-	-
2022	CATGAGGGGCTTCCACAAAACAAGGA	FE669741.1	-	-	-	-	-	-	-	-	-	-	-	-	-	-	-	-
2023	CATGCTAGTATAGAAGCAGTCACAGG	FE669740.1	-	-	-	-	-	-	-	-	-	-	-	-	-	-	-	-
2025	CATGAAAACCGGTCCGAACCTGATGG	FE669738.1	-	-	-	-	-	-	-	-	-	-	-	-	-	-	-	-
2027	CATGATGGATTAAAAAAACCATAAAT	FE669735.1	-	-	-	-	-	-	-	-	-	-	-	-	-	-	-	-
2029	CATGCTTTTCCAGCAGCCTTGATGAC	FE669732.1	-	-	-	-	-	-	-	-	-	-	-	-	-	-	-	-
2030	CATGTAGGAGAGTGCAGTGGAATGAT	FE669731.1	-	-	-	-	-	-	-	-	-	-	-	-	-	-	-	-
2033	CATGTCGAAAAATCCAGTTTGTGTGT	FE669723.1	-	-	-	-	-	-	-	-	-	-	-	-	-	-	-	-
2034	CATGATGTTGAAGTCGAGCTTAATAA	FE669722.1	-	-	-	-	-	-	-	-	-	-	-	-	-	-	-	-
2035	CATGCTCAGGCAGTGACTCCTTCTGC	FE669721.1	-	-	-	-	-	-	-	-	-	-	-	-	-	-	-	-
2036	CATGCGTGTGAACCGAGGTTACTATC	FE669720.1	-	-	-	-	-	-	-	-	-	-	-	-	-	-	-	-
2039	CATGTGTCTTGAGCCATTGCTCGGCG	FE669717.1	8e-07	Cicer arietinum mRNA for plastoquinol-plastocyanin reductase, partial cds	AB025003	Plastoquinol-plastocyanin reductase (Fragment)	Q9SXU4_CICAR	-	-	-	-	-	-	-	-	-	-	-
2040	CATGACAAGTTCCCAACAAAAAGCTT	FE669715.1	-	-	-	-	-	-	-	-	-	-	-	-	-	-	-	-
2041	CATGCTTTGAAAACCACTTCTCATTA	FE669714.1	-	-	-	-	-	-	-	-	-	-	-	-	-	-	-	-
2044	CATGTTCTAGGCAACATCTGACCACC	FE669710.1	-	-	-	-	-	BF520754	8e-05	1	0	U21139	0	Pisum sativum chaperonin precursor mRNA, chloroplast gene encoding chloroplast protein, complete cds	RuBisCO large subunit-binding protein subunit beta, chloroplastic precursor; (AltName	RUBB_PEA	-	-
2045	CATGGTTTGTGGAGGACCACATCATT	FE669706.1	-	-	-	-	-	-	-	-	-	-	-	-	-	-	-	-
2046	CATGCTCGGAGATCAGCACAGCACTG	FE669705.1	-	-	-	-	-	-	-	-	-	-	-	-	-	-	-	-
2047	CATGTAGACGCCTGCCTTTGAAAATG	FE669704.1	-	-	-	-	-	-	-	-	-	-	-	-	-	-	-	-
2048	CATGAGTAAACTTCTCGCTAAACCTA	FE669702.1	-	-	-	-	-	-	-	-	-	-	-	-	-	-	-	-
2049	CATGCATCATATACCCAATTAAGCAA	FE669701.1	-	-	-	-	-	-	-	-	-	-	-	-	-	-	-	-
2052	CATGTCCAATATGTTGGTGGTTACCT	FE669697.1	-	-	-	-	-	AL386648	8e-05	1	0	AJ404848	5e-109	Glycine max mRNA for ribosomal protein L2 (rpL2 gene)	Ribosomal protein L2	Q9FEZ7_SOYBN	-	-
2054	CATGACCACCGTCCTGCTGTCTTAAT	FE669695.1	8e-07	Robinia pseudoacacia 26S ribosomal RNA gene, partial sequence	EU340885	-	-	CX526822	3e-07	0	0	EF571299	0	Glycyrrhiza uralensis 26S ribosomal RNA, partial sequence	-	-	-	Correlated RNA description
2056	CATGTGTTGCTTACCCTCGTTCCGAT	FE669693.1	-	-	-	-	-	BQ151125	1e-06	0	0	AJ518837	4e-31	Glycine max mRNA for putative phosphatase (nod33 gene)	Putative phosphatase	Q8GT55_SOYBN	-	-
2063	CATGGACAAAGTTGTATGTCACATTG	FE669685.1	-	-	-	-	-	-	-	-	-	-	-	-	-	-	-	-
2064	CATGAATCGGCCCACTTCCGTTTTTT	FE669684.1	-	-	-	-	-	-	-	-	-	-	-	-	-	-	-	-
2065	CATGGTTTTTTCTTCCTCCAATTGGC	FE669683.1	-	-	-	-	-	-	-	-	-	-	-	-	-	-	-	-
2069	CATGGATCCACCAGTACCGGCACAAA	FE669678.1	-	-	-	-	-	-	-	-	-	-	-	-	-	-	-	-
2072	CATGACTTGTTGTCTCTGATACAACA	FE669675.1	-	-	-	-	-	-	-	-	-	-	-	-	-	-	-	-
2074	CATGGAGTAAAACTGGTGGTTTAGGA	FE669673.1	5e-05	Pisum sativum mRNA for granule-bound starch synthase (gbssIb gene)	AJ345045	Granule-bound starch synthase precursor; ( EC=2	Q93YB1_PEA	CA991157	8e-05	1	0	AJ345045	0	Pisum sativum mRNA for granule-bound starch synthase (gbssIb gene)	Granule-bound starch synthase precursor; ( EC=2.4.1.11)	Q93YB1_PEA	correlated ID	-
2075	CATGATATTGAAAATCGGTAGCTGTT	FE669672.1	-	-	-	-	-	-	-	-	-	-	-	-	-	-	-	-
2076	CATGTCATATTTGTACCCGCTGTCCA	FE669670.1	8e-07	Cicer arietinum mRNA for 20S proteasome beta subunit	AJ011383	20S proteasome beta subunit; ( EC=3	Q9ZRY9_CICAR	EV262660	3e-07	0	0	AJ011383	0	Cicer arietinum mRNA for 20S proteasome beta subunit	20S proteasome beta subunit; ( EC=3.4.99.46)	Q9ZRY9_CICAR	correlated ID	-
2077	CATGAAGCTTGTCTTCCAATTCCAGT	FE670424.1	-	-	-	-	-	-	-	-	-	-	-	-	-	-	-	-
2078	CATGATTCCAAATTGATGTCGTCCAT	FE670423.1	-	-	-	-	-	-	-	-	-	-	-	-	-	-	-	-
2080	CATGGATCAAAAATGCGCGGAAACTT	FE670421.1	-	-	-	-	-	-	-	-	-	-	-	-	-	-	-	-
2083	CATGAAAGGAAAAAACTACTTGGTCT	FE670415.1	-	-	-	-	-	BG647336	8e-05	1	0	AY547301	0	Lupinus angustifolius nitrilase 4A (NIT4A) mRNA, complete cds	Nitrilase 4A	Q5QGZ8_LUPAN	-	-
2086	CATGGTTCCTCTATGCAGTTCCCTTA	FE670052.1	-	-	-	-	-	-	-	-	-	-	-	-	-	-	-	-
2087	CATGGACAAATCCCCTCATTCCTATC	FE670051.1	-	-	-	-	-	-	-	-	-	-	-	-	-	-	-	-
2088	CATGGAATCAATTTCTAGAGCCGTGT	FE670050.1	-	-	-	-	-	-	-	-	-	-	-	-	-	-	-	-
2089	CATGGATAGTACCATTAGGAAGAAGA	FE670048.1	-	-	-	-	-	-	-	-	-	-	-	-	-	-	-	-
2090	CATGGCTTGATGGCAGTCTACCTGAA	FE670047.1	-	-	-	-	-	-	-	-	-	-	-	-	-	-	-	-
2091	CATGAATTGTATATAAGAAAACAATA	FE670045.1	-	-	-	-	-	-	-	-	-	-	-	-	-	-	-	-
2092	CATGCGCAGATCTGTTAGTTAGAGTA	FE670044.1	-	-	-	-	-	-	-	-	-	-	-	-	-	-	-	-
2094	CATGGGCACATTGGAGCATCTTTCAT	FE670042.1	-	-	-	-	-	-	-	-	-	-	-	-	-	-	-	-
2096	CATGTTCTATTTCACTCCCCGATGGG	FE670412.1	-	-	-	-	-	-	-	-	-	-	-	-	-	-	-	-
2097	CATGAGAACGAGAATGATACGGTCAC	FE670411.1	-	-	-	-	-	-	-	-	-	-	-	-	-	-	-	-
2102	CATGAGACCTTTAAGGACAGGGTATA	FE670403.1	-	-	-	-	-	-	-	-	-	-	-	-	-	-	-	-
2103	CATGCCTGTGGTATTATAAGGCATTA	FE670402.1	-	-	-	-	-	-	-	-	-	-	-	-	-	-	-	-
2104	CATGAAAACGAGAAACACCAAAGATG	FE670040.1	-	-	-	-	-	-	-	-	-	-	-	-	-	-	-	-
2105	CATGCAATTAGACTACAGTGATGCTC	FE670039.1	-	-	-	-	-	-	-	-	-	-	-	-	-	-	-	-
2107	CATGCTCGCTCGCGGCAACGCAAACC	FE670034.1	-	-	-	-	-	-	-	-	-	-	-	-	-	-	-	-
2108	CATGGAGGTTCCTGCTAAGAAGGCTT	FE670400.1	-	-	-	-	-	-	-	-	-	-	-	-	-	-	-	-
2110	CATGATTTCATCTGTGTAAAGATTAG	FE670395.1	-	-	-	-	-	-	-	-	-	-	-	-	-	-	-	-
2111	CATGACCAGACTGGATGCGAAACACC	FE670394.1	-	-	-	-	-	-	-	-	-	-	-	-	-	-	-	-
2112	CATGCACGTCTGACAGGAAATGGTGT	FE670393.1	-	-	-	-	-	-	-	-	-	-	-	-	-	-	-	-
2113	CATGCTGCGATTGGCATTCACACACA	FE670392.1	-	-	-	-	-	-	-	-	-	-	-	-	-	-	-	-
2114	CATGCATCATACCATTAACAAAAGAC	FE670029.1	-	-	-	-	-	-	-	-	-	-	-	-	-	-	-	-
2115	CATGGTACGGTCCAGACCGTGTGAAG	FE670027.1	8e-07	Cicer arietinum mRNA for chlorophyll a/b binding protein	AJ131044	Chlorophyll a/b binding protein precursor	Q9ZP08_CICAR	EX528572	3e-07	0	0	AF072931	9e-165	Medicago sativa chlorophyll a/b binding protein (CARCAB1) mRNA, complete cds	Chlorophyll a/b binding protein	O81391_MEDSA	no	Correlated protein name
2116	CATGGCTGCAATGAACTCAAGTGTAT	FE670024.1	-	-	-	-	-	CX541035	3e-07	0	0	AF492824	4e-73	Phaseolus vulgaris photosystem I-N subunit (PSI-N) mRNA, complete cds	Photosystem I-N subunit	Q84U30_PHAVU	-	-
2117	CATGTGAGGATTATAAGCTCTATAAG	FE670023.1	-	-	-	-	-	-	-	-	-	-	-	-	-	-	-	-
2119	CATGGTAGCCAATGCAAATATTAGGT	FE670020.1	-	-	-	-	-	-	-	-	-	-	-	-	-	-	-	-
2123	CATGAGGGCGCTCTCGCGCGCTCTCG	FE670387.1	-	-	-	-	-	-	-	-	-	-	-	-	-	-	-	-
2124	CATGAAACCCCTGAAACGTGCGTCTC	FE670384.1	-	-	-	-	-	-	-	-	-	-	-	-	-	-	-	-
2125	CATGGCTTCAAGTGCGACAACAGAGG	FE670383.1	-	-	-	-	-	-	-	-	-	-	-	-	-	-	-	-
2126	CATGTATTCAATTCGAAGTGTCGGTA	FE670382.1	-	-	-	-	-	-	-	-	-	-	-	-	-	-	-	-
2128	CATGGGGTGGAATCCAGTGGGAGAAA	FE670016.1	-	-	-	-	-	-	-	-	-	-	-	-	-	-	-	-
2129	CATGTCAGCAAGTCTCAACTGCAAGG	FE670015.1	-	-	-	-	-	-	-	-	-	-	-	-	-	-	-	-
2131	CATGTTACCGCTAGCTTGATCTGACC	FE670011.1	-	-	-	-	-	-	-	-	-	-	-	-	-	-	-	-
2134	CATGCATCCTTTGGAGATATTCCTTT	FE670376.1	-	-	-	-	-	-	-	-	-	-	-	-	-	-	-	-
2135	CATGCCTGAGGAATATTGTGTGTAAC	FE670373.1	-	-	-	-	-	-	-	-	-	-	-	-	-	-	-	-
2136	CATGAGAGCAGCAAAATCAAAGACAT	FE670371.1	-	-	-	-	-	-	-	-	-	-	-	-	-	-	-	-
2137	CATGTGCTTCGACACAATATGATGGA	FE670370.1	-	-	-	-	-	-	-	-	-	-	-	-	-	-	-	-
2139	CATGAACAAGGTCATAAGTCAAACTT	FE670366.1	-	-	-	-	-	-	-	-	-	-	-	-	-	-	-	-
2141	CATGATGAATCGGTTTTTGCCGGTTG	FE670003.1	-	-	-	-	-	-	-	-	-	-	-	-	-	-	-	-
2145	CATGAATCTGTCAATAATGTTGTTGA	FE669998.1	-	-	-	-	-	-	-	-	-	-	-	-	-	-	-	-
2146	CATGGCTAATCTCGCGTTCTTAAATT	FE669997.1	-	-	-	-	-	-	-	-	-	-	-	-	-	-	-	-
2148	CATGTACAAACCAAAAAATTTCTTGT	FE669995.1	-	-	-	-	-	-	-	-	-	-	-	-	-	-	-	-
2151	CATGCCAGAGAAGGGTGACTGGCGTA	FE670364.1	-	-	-	-	-	-	-	-	-	-	-	-	-	-	-	-
2152	CATGCTTCAACTGTACGACGTAAGGC	FE670363.1	-	-	-	-	-	-	-	-	-	-	-	-	-	-	-	-
2155	CATGGCCAACCGACAATTCTTGATTT	FE670360.1	-	-	-	-	-	-	-	-	-	-	-	-	-	-	-	-
2156	CATGTCGTCCATACGAGAGGGAGCGA	FE670359.1	-	-	-	-	-	-	-	-	-	-	-	-	-	-	-	-
2157	CATGAGCTGCAGATGCTGCACGCGCA	FE670355.1	-	-	-	-	-	-	-	-	-	-	-	-	-	-	-	-
2160	CATGGAGCGGACAAAGGCTTTGAAGA	FE669987.1	-	-	-	-	-	-	-	-	-	-	-	-	-	-	-	-
2161	CATGAAGTTCAAGCTGAAGACCAAGG	FE669986.1	-	-	-	-	-	-	-	-	-	-	-	-	-	-	-	-
2163	CATGTAGGAACAAGGTTCAAGTCTAC	FE669982.1	8e-07	-	-	-	-	-	-	-	-	-	-	-	-	-	-	-
2164	CATGATACCAGGGACAGAAGGGGGAA	FE670353.1	-	-	-	-	-	CA918898	8e-05	1	0	AB236836	0	Trifolium pratense RNA for putative fructose bisphosphate aldolase, complete cds, clone: C2543	Fructose-bisphosphate aldolase; ( EC=4.1.2.13)	Q2PER4_TRIPR	-	-
2166	CATGCTTGAATTCATTCTTGGTGGAA	FE670348.1	-	-	-	-	-	-	-	-	-	-	-	-	-	-	-	-
2167	CATGTTACCATATTCCAAGAGTTTCT	FE670347.1	-	-	-	-	-	-	-	-	-	-	-	-	-	-	-	-
2168	CATGCTCCTCACCTGGAACTTCCACA	FE670346.1	-	-	-	-	-	-	-	-	-	-	-	-	-	-	-	-
2169	CATGAAACGACAACTAAAACAAAAAG	FE670343.1	-	-	-	-	-	-	-	-	-	-	-	-	-	-	-	-
2173	CATGCGGCGCACTCCCCTTGCTCCTC	FE669979.1	-	-	-	-	-	-	-	-	-	-	-	-	-	-	-	-
2174	CATGGGTGTCAAAGGTATTGTTGAAG	FE669977.1	-	-	-	-	-	-	-	-	-	-	-	-	-	-	-	-
2177	CATGGAGGGCTTCATTGTCCTTTTCA	FE669974.1	-	-	-	-	-	-	-	-	-	-	-	-	-	-	-	-
2179	CATGGCTCTCTCTTCACCAACCTTAG	FE669972.1	8e-07	Cicer arietinum mRNA for chlorophyll a/b binding protein	AJ131044	Chlorophyll a/b binding protein precursor	Q9ZP08_CICAR	EX530226	5e-06	0	0	AF072931	0	Medicago sativa chlorophyll a/b binding protein (CARCAB1) mRNA, complete cds	Chlorophyll a/b binding protein	O81391_MEDSA	no	Correlated protein name
2180	CATGAGGAATGATCCTCCTCCTACCG	FE669971.1	-	-	-	-	-	-	-	-	-	-	-	-	-	-	-	-
2182	CATGGCAGCAATGAACTCAAGTGTAT	FE670341.1	-	-	-	-	-	-	-	-	-	-	-	-	-	-	-	-
2183	CATGAGGGATTTGGAAGAGTTGTTGT	FE670340.1	-	-	-	-	-	-	-	-	-	-	-	-	-	-	-	-
2185	CATGCCTTGTTGTTGACCGGGTCACA	FE670337.1	-	-	-	-	-	-	-	-	-	-	-	-	-	-	-	-
2187	CATGAATGGGCCTCCTCCTCAACAGT	FE670334.1	-	-	-	-	-	-	-	-	-	-	-	-	-	-	-	-
2188	CATGTTGGGTGTTGCAGGGATGTTAC	FE670333.1	3e-06	Pisum sativum PSI light-harvesting antenna chlorophyll a/b-binding protein (lhcA-P4) mRNA, complete cds	AF002248	Chlorophyll a-b binding protein P4, chloroplastic precursor; (AltName: Full=LHCI type III CAB-P4)	CB24_PEA	-	-	-	-	-	-	-	-	-	-	-
2189	CATGGATTGAAAAATGATTCTGAACC	FE670332.1	-	-	-	-	-	BQ137040	8e-05	1	0	AB236821	3e-31	Trifolium pratense RNA for putative tetrahydrofolate synthase, complete cds, clone: C2147	Putative tetrahydrofolate synthase	Q2PES9_TRIPR	-	-
2191	CATGTCTAGCAATATGTATAATAAAA	FE669969.1	-	-	-	-	-	EX525989	8e-05	1	0	EF623858	7e-20	Glycine max cultivar Williams 82 clone 28O17, complete sequence	-	-	-	-
2193	CATGTATGGGGGCTGACGCCTGCCCA	FE669966.1	-	-	-	-	-	-	-	-	-	-	-	-	-	-	-	-
2195	CATGGTGATTTGTTTTGGTGTGTCAC	FE669964.1	-	-	-	-	-	-	-	-	-	-	-	-	-	-	-	-
2197	CATGTGGTGCAGCAATGTCAAGCCCA	FE669962.1	-	-	-	-	-	-	-	-	-	-	-	-	-	-	-	-
2198	CATGTCTTTAAGATCGCTCAAACATA	FE669958.1	-	-	-	-	-	-	-	-	-	-	-	-	-	-	-	-
2199	CATGGATGCTCCGGTGAAGGCTCCTC	FE670808.1	8e-07	Cicer arietinum partial mRNA for tonoplast intrinsic protein (tip gene)	AJ489613	Tonoplast intrinsic protein (Fragment)	Q8L5G0_CICAR	CB895109	3e-07	0	0	AJ251652	0	Medicago truncatula mRNA for aquaporin (aqp1 gene)	Probable aquaporin TIP-type; (AltName	TIP1_MEDTR	no	Correlated protein name
2200	CATGCAATAACAAAAGCGTTTTCGTT	FE670807.1	-	-	-	-	-	-	-	-	-	-	-	-	-	-	-	-
2203	CATGTTTTCCCTTTGCAACAAAATTT	FE670804.1	-	-	-	-	-	-	-	-	-	-	-	-	-	-	-	-
2204	CATGAATCACCTCATATGCCTGATAT	FE670802.1	-	-	-	-	-	-	-	-	-	-	-	-	-	-	-	-
2205	CATGGGGCTTAACTGACGACCCTGAA	FE670801.1	-	-	-	-	-	-	-	-	-	-	-	-	-	-	-	-
2206	CATGCTTATCAAATATCAACTTTATC	FE670800.1	-	-	-	-	-	-	-	-	-	-	-	-	-	-	-	-
2211	CATGGTTATCTGGTACAATATCAAAG	FE670794.1	-	-	-	-	-	-	-	-	-	-	-	-	-	-	-	-
2212	CATGAATTCTATATATCTACTATTCA	FE670793.1	-	-	-	-	-	-	-	-	-	-	-	-	-	-	-	-
2213	CATGCCTATTGCTGCTCGCTTAAAGA	FE670791.1	8e-07	Glycine max plasma membrane Ca2+-ATPase (SCA1) mRNA, complete cds	AF195028	Plasma membrane Ca2+-ATPase	Q9FVE8_SOYBN	AL371289	1e-06	0	0	AY103493	0	Medicago truncatula type IIB calcium ATPase MCA5 (MCA5) mRNA, complete cds	Type IIB calcium ATPase MCA5	Q8L8A0_MEDTR	no	Correlated protein name (partial)
2214	CATGCTTTATCCTTTAAAATAGTGTT	FE670790.1	-	-	-	-	-	-	-	-	-	-	-	-	-	-	-	-
2215	CATGTCTGTGAAGATGCGGACTACCT	FE670789.1	-	-	-	-	-	BF637759	3e-07	0	0	X55033	0	P.sativum chloroplast DNA of the single ribosomal RNA operon	-	-	-	-
2216	CATGTTTGGAGAGGGCAGAGTGGAGG	FE670784.1	-	-	-	-	-	-	-	-	-	-	-	-	-	-	-	-
2219	CATGTTAGATATTACTGTCATTGCAA	FE670779.1	-	-	-	-	-	-	-	-	-	-	-	-	-	-	-	-
2221	CATGAATCAGATTTGGGTTGCCCAAA	FE670777.1	-	-	-	-	-	-	-	-	-	-	-	-	-	-	-	-
2222	CATGCACGTGCAATTAGAGACGTAGA	FE670776.1	-	-	-	-	-	-	-	-	-	-	-	-	-	-	-	-
2223	CATGCTAGAGATTTTATGGAGGCTGC	FE670775.1	-	-	-	-	-	-	-	-	-	-	-	-	-	-	-	-
2225	CATGCCCCCACATATACCTCGATATT	FE670773.1	-	-	-	-	-	-	-	-	-	-	-	-	-	-	-	-
2226	CATGTCTGTACATATTTCATTTTACT	FE670771.1	-	-	-	-	-	-	-	-	-	-	-	-	-	-	-	-
2227	CATGAAGTCACTTTTGATTAATAGTT	FE670769.1	-	-	-	-	-	-	-	-	-	-	-	-	-	-	-	-
2228	CATGGCCAATTCCATCATTGTCATCC	FE670768.1	-	-	-	-	-	-	-	-	-	-	-	-	-	-	-	-
2229	CATGCCCAGGAACATCTTGGAGAGGT	FE670767.1	-	-	-	-	-	-	-	-	-	-	-	-	-	-	-	-
2231	CATGGAACATTTGATACTAAAGGTGG	FE670763.1	-	-	-	-	-	-	-	-	-	-	-	-	-	-	-	-
2232	CATGTACAAAATTAATGGAACGGCTA	FE670762.1	-	-	-	-	-	-	-	-	-	-	-	-	-	-	-	-
2233	CATGTCAGAAAATTGCTCTTGTCCCA	FE670761.1	-	-	-	-	-	-	-	-	-	-	-	-	-	-	-	-
2234	CATGAGCTTCAAAGAAAGGAAGATAA	FE670756.1	-	-	-	-	-	-	-	-	-	-	-	-	-	-	-	-
2235	CATGTCCAGGTGGAGGGTATGCACCT	FE670754.1	-	-	-	-	-	-	-	-	-	-	-	-	-	-	-	-
2236	CATGTTGCTCAATGTTACGAATCCAA	FE670753.1	-	-	-	-	-	EV257321	8e-05	1	0	Z73947	0	L.japonicus mRNA for small GTP-binding protein, RAB8D	RAB8D	Q40218_LOTJA	-	-
2237	CATGTTTGCTGCTTAGATTGGAAGCT	FE670751.1	-	-	-	-	-	-	-	-	-	-	-	-	-	-	-	-
2238	CATGGCATTTCCCTATGTGGCAGCAT	FE670750.1	-	-	-	-	-	-	-	-	-	-	-	-	-	-	-	-
2240	CATGCATTCCTGCTTCTTGACAAATA	FE670747.1	8e-07	Cicer arietinum mRNA for putative 26S protease regulatory subunit 6, partial	AJ006095	26S protease regulatory subunit 6 (Fragment)	O65750_CICAR	CX520701	3e-07	0	0	AJ006095	0	Cicer arietinum mRNA for putative 26S protease regulatory subunit 6, partial	26S protease regulatory subunit 6 (Fragment)	O65750_CICAR	correlated ID	-
2245	CATGCTCGCTCGCGGCAACACAAACC	FE670742.1	-	-	-	-	-	-	-	-	-	-	-	-	-	-	-	-
2246	CATGTTAATGTTCAAGGCAACAAGGC	FE670741.1	-	-	-	-	-	-	-	-	-	-	-	-	-	-	-	-
2248	CATGGATGTTGGAGATCTCTTCTCCA	FE670739.1	-	-	-	-	-	-	-	-	-	-	-	-	-	-	-	-
2249	CATGTTCACCCAATGGTGTGGTCCCT	FE670738.1	-	-	-	-	-	-	-	-	-	-	-	-	-	-	-	-
2250	CATGGAAACACCAAATTCATTTTCAA	FE670737.1	-	-	-	-	-	-	-	-	-	-	-	-	-	-	-	-
2251	CATGTTGGAGAGAGCTACAAGGTCTG	FE670736.1	-	-	-	-	-	-	-	-	-	-	-	-	-	-	-	-
2252	CATGGAAGTTAACAACTTCTCTTTCA	FE670734.1	-	-	-	-	-	-	-	-	-	-	-	-	-	-	-	-
2253	CATGGTCTGCAGTGCAGGAGAGAGCA	FE670733.1	-	-	-	-	-	-	-	-	-	-	-	-	-	-	-	-
2256	CATGATGAAATTGACATTGAATTTCT	FE670729.1	-	-	-	-	-	-	-	-	-	-	-	-	-	-	-	-
2260	CATGGATTCAACCATTCCTCAGGGAC	FE670724.1	-	-	-	-	-	BG457434	3e-07	0	0	X63102	1e-05	P.vulgaris gene for endopeptidase	Vignain precursor; ( EC=3.4.22.-; AltName	CYSEP_PHAVU	-	-
2261	CATGTATCATCATATTCACTACGAAT	FE670722.1	-	-	-	-	-	-	-	-	-	-	-	-	-	-	-	-
2262	CATGACAATGCCTCTGCATAATGTTG	FE670721.1	-	-	-	-	-	-	-	-	-	-	-	-	-	-	-	-
2263	CATGTAGATGCTGCTGTGGCTTTCTA	FE670720.1	-	-	-	-	-	-	-	-	-	-	-	-	-	-	-	-
2264	CATGAGTACGAATAACCAATGTAAAT	FE670716.1	-	-	-	-	-	-	-	-	-	-	-	-	-	-	-	-
2265	CATGGTAATAGGGCGTGAAGGATCTT	FE670715.1	-	-	-	-	-	-	-	-	-	-	-	-	-	-	-	-
2267	CATGAGAGGACTTCGAGGTCAGAATT	FE669665.1	-	-	-	-	-	-	-	-	-	-	-	-	-	-	-	-
2268	CATGATATTGTTGAGTGTCGACCATC	FE669664.1	-	-	-	-	-	-	-	-	-	-	-	-	-	-	-	-
2269	CATGCACGAAAAGGGATTTGTTTCCG	FE669662.1	-	-	-	-	-	-	-	-	-	-	-	-	-	-	-	-
2270	CATGATCAGCACCATAGACATCCACA	FE669661.1	-	-	-	-	-	-	-	-	-	-	-	-	-	-	-	-
2271	CATGAATTTCTCAACCTCTGTCTGTG	FE669660.1	-	-	-	-	-	-	-	-	-	-	-	-	-	-	-	-
2272	CATGTGAAGATGAGTACTTGAGTCCA	FE669658.1	-	-	-	-	-	-	-	-	-	-	-	-	-	-	-	-
2274	CATGGGGCACGTGGAATCCCGTGTGA	FE669656.1	8e-07	Vigna unguiculata partial mRNA for putative ATP synthase CF0 subunit I (atpF gene), clone 61	AM748447	-	A6H5B5_VIGUN	-	-	-	-	-	-	-	-	-	-	-
2278	CATGAAAAAACACTTGATCCACTTGG	FE669651.1	-	-	-	-	-	-	-	-	-	-	-	-	-	-	-	-
2280	CATGCTTAATCTCAGCCAGTTTCAAT	FE669649.1	-	-	-	-	-	CA918399	8e-05	1	0	AF139470	0	Vigna radiata chlorophyll a/b-binding protein CP24 precursor (CipCp24) mRNA, complete cds; nuclear gene for chloroplast product	Chlorophyll a/b-binding protein CP24	Q9XQB6_PHAAU	-	-
2281	CATGGTTCAGTCTGTGCCTTCTAGAA	FE669648.1	-	-	-	-	-	-	-	-	-	-	-	-	-	-	-	-
2282	CATGGCCAACCGACCATTCTTGATTT	FE669647.1	-	-	-	-	-	-	-	-	-	-	-	-	-	-	-	-
2283	CATGTCCGTTCTTGTAACTGGTTCAG	FE669646.1	-	-	-	-	-	-	-	-	-	-	-	-	-	-	-	-
2286	CATGTATACAAGAAGTTTCTGGAAGA	FE669643.1	-	-	-	-	-	-	-	-	-	-	-	-	-	-	-	-
2290	CATGACACCCCATCCAGCCTTTTTGG	FE669638.1	-	-	-	-	-	CX532104	8e-05	1	0	AY496909	0	Glycine max enolase mRNA, complete cds	Enolase; ( EC=4.2.1.11)	Q6RIB7_SOYBN	-	-
2292	CATGTGGGGCTTGAAAAAACACAACT	FE669635.1	-	-	-	-	-	-	-	-	-	-	-	-	-	-	-	-
2293	CATGTTTGATTTCAGCCAATTGAAGA	FE669634.1	-	-	-	-	-	-	-	-	-	-	-	-	-	-	-	-
2294	CATGAACAATAATTTTGATTTGCCTG	FE669632.1	-	-	-	-	-	-	-	-	-	-	-	-	-	-	-	-
2296	CATGCTCATTCCAGCAGATTACGTCT	FE669627.1	-	-	-	-	-	-	-	-	-	-	-	-	-	-	-	-
2298	CATGCTTTTTTTAATATATAATATGT	FE669625.1	-	-	-	-	-	-	-	-	-	-	-	-	-	-	-	-
2299	CATGTAAGGATGGTCTTCAATCTCAA	FE669624.1	-	-	-	-	-	-	-	-	-	-	-	-	-	-	-	-
2301	CATGGCTTATTCAGAGATTGTAGCAT	FE669619.1	-	-	-	-	-	-	-	-	-	-	-	-	-	-	-	-
2302	CATGTTCTTATCAAAACTGCAAATTT	FE669618.1	-	-	-	-	-	-	-	-	-	-	-	-	-	-	-	-
2304	CATGCAAGCATTTTTTTATTAGCTTT	FE669616.1	-	-	-	-	-	-	-	-	-	-	-	-	-	-	-	-
2306	CATGACACATCTCTCCCCCCACACCC	FE669614.1	-	-	-	-	-	-	-	-	-	-	-	-	-	-	-	-
2308	CATGGCAGGGGCAGATAAACTTGTTC	FE669612.1	8e-07	Cicer arietinum mRNA for plastoquinol-plastocyanin reductase, partial cds	AB025003	Plastoquinol-plastocyanin reductase (Fragment)	Q9SXU4_CICAR	-	-	-	-	-	-	-	-	-	-	-
2309	CATGGAGGTGTAAATTTGGTGTCTGA	FE669611.1	-	-	-	-	-	-	-	-	-	-	-	-	-	-	-	-
2312	CATGCAGGAGCGGGAAATAGACGGAA	FE669605.1	-	-	-	-	-	-	-	-	-	-	-	-	-	-	-	-
2313	CATGATTTGGAAAACATCATTTTTTT	FE669604.1	-	-	-	-	-	-	-	-	-	-	-	-	-	-	-	-
2317	CATGATATTTTTCAGTGTCATCACTT	FE669600.1	-	-	-	-	-	-	-	-	-	-	-	-	-	-	-	-
2318	CATGGTTGTCTGCCTGCATTATTGAA	FE669599.1	-	-	-	-	-	-	-	-	-	-	-	-	-	-	-	-
2319	CATGGCTGTTTACAGAAAGCTTGCCA	FE669598.1	-	-	-	-	-	-	-	-	-	-	-	-	-	-	-	-
2321	CATGTTGTTAAATAAAACTATCGCAA	FE669596.1	-	-	-	-	-	-	-	-	-	-	-	-	-	-	-	-
2322	CATGTGGATAATATACACACAAAATT	FE669595.1	-	-	-	-	-	-	-	-	-	-	-	-	-	-	-	-
2323	CATGTAAGCAACAGAAAAACATAAAA	FE669594.1	-	-	-	-	-	-	-	-	-	-	-	-	-	-	-	-
2324	CATGCCAATCATCCCCTTCTCATTTA	FE669593.1	-	-	-	-	-	-	-	-	-	-	-	-	-	-	-	-
2327	CATGACCATAGTTACAACCACCATTG	FE669590.1	-	-	-	-	-	-	-	-	-	-	-	-	-	-	-	-
2328	CATGGGTTAATAATTACCCATATGGT	FE669589.1	-	-	-	-	-	-	-	-	-	-	-	-	-	-	-	-
2329	CATGAATTACAATTACTCTTCCTCCT	FE669588.1	-	-	-	-	-	-	-	-	-	-	-	-	-	-	-	-
2332	CATGGACCTTTCTTCCTTGGCCAATT	FE669584.1	-	-	-	-	-	-	-	-	-	-	-	-	-	-	-	-
2334	CATGCTCTCTGAGAATGATCCAAAAT	FE669581.1	-	-	-	-	-	-	-	-	-	-	-	-	-	-	-	-
2335	CATGGCTCGTCTAATGGTGCACGCGT	FE669580.1	-	-	-	-	-	-	-	-	-	-	-	-	-	-	-	-
2336	CATGTGGAAAAGAAGGCCTTGTGGGA	FE669579.1	-	-	-	-	-	-	-	-	-	-	-	-	-	-	-	-
2337	CATGTACTTTCACCAGTTGGAGCTGA	FE669578.1	-	-	-	-	-	-	-	-	-	-	-	-	-	-	-	-
2338	CATGGACTTGGTAATTATACCTGCTG	FE669577.1	-	-	-	-	-	EV255240	8e-05	1	0	AY166633	0	Pisum sativum putative malate dehydrogenase (MDH) mRNA, complete cds	Malate dehydrogenase; ( EC=1.1.1.37)	Q5JC56_PEA	-	-
2341	CATGTATGTCCAATGGAAGTATGCTC	FE669957.1	-	-	-	-	-	-	-	-	-	-	-	-	-	-	-	-
2343	CATGGCTGCTTACAAAGTGAAACTCA	FE669954.1	-	-	-	-	-	-	-	-	-	-	-	-	-	-	-	-
2345	CATGCAAGCCAATTCTTACACCACGA	FE669952.1	-	-	-	-	-	-	-	-	-	-	-	-	-	-	-	-
2346	CATGGCATAATTGTTGTTTATGATGT	FE669951.1	8e-07	L.japonicus mRNA for small GTP-binding protein, RAB1C	Z73932	RAB1C	Q40203_LOTJA	DY633358	8e-05	1	0	AB024994	0	Cicer arietinum mRNA for rab-type small GTP-binding protein, complete cds	Rab-type small GTP-binding protein	Q9SXT5_CICAR	no	Correlated protein name
2347	CATGGCAGTAGAACTGATGACAACGG	FE669949.1	-	-	-	-	-	-	-	-	-	-	-	-	-	-	-	-
2348	CATGTCCCCACAGAGATCAATGGCTA	FE669948.1	-	-	-	-	-	-	-	-	-	-	-	-	-	-	-	-
2349	CATGTTTCTTATTACAACCTCTTCAT	FE669944.1	-	-	-	-	-	-	-	-	-	-	-	-	-	-	-	-
2350	CATGGGGACTCGGAATGCCTATCGTA	FE669943.1	-	-	-	-	-	-	-	-	-	-	-	-	-	-	-	-
2351	CATGAGCCTCTTCGGTATTGGAAGAA	FE669942.1	-	-	-	-	-	-	-	-	-	-	-	-	-	-	-	-
2352	CATGATGTCAATATGGAAGAGGAGAC	FE669939.1	-	-	-	-	-	DY615496	1e-06	0	0	AF169022	0	Glycine max seed maturation protein PM37 (PM37) mRNA, complete cds	Seed maturation protein PM37	Q9SWB5_SOYBN	-	-
2353	CATGCGCATCCCTTAAATTAGATGTA	FE669937.1	-	-	-	-	-	-	-	-	-	-	-	-	-	-	-	-
2354	CATGATGACTTGACGTCATCCTCACC	FE669936.1	8e-07	Arachis hypogaea cultivar JL24 16S ribosomal RNA gene, partial sequence; plastid	EU982406	-	-	BF646289	3e-07	0	0	AF372517	0	Medicago sativa 16S ribosomal RNA gene, partial sequence; and tRNA-Ile and tRNA-Ala genes, complete sequence; chloroplast genes for chloroplast products	-	-	-	Correlated RNA description
2359	CATGGCCACCACAAACCCTTTATCCC	FE669931.1	-	-	-	-	-	-	-	-	-	-	-	-	-	-	-	-
2362	CATGGCTTGATATCAAATTCAACCTA	FE669928.1	-	-	-	-	-	-	-	-	-	-	-	-	-	-	-	-
2363	CATGTGAGGAGCAGCAGCAAGTGTTG	FE669926.1	-	-	-	-	-	-	-	-	-	-	-	-	-	-	-	-
2364	CATGTTACCATATTCCAAAAGTTTCT	FE669925.1	-	-	-	-	-	-	-	-	-	-	-	-	-	-	-	-
2365	CATGACGGCACCCTCACGCGCTTACA	FE669924.1	-	-	-	-	-	-	-	-	-	-	-	-	-	-	-	-
2369	CATGATGACATTTCCTCATCTTTCAC	FE669918.1	-	-	-	-	-	-	-	-	-	-	-	-	-	-	-	-
2370	CATGAAGAAACATAATGCTGGAACAA	FE669914.1	-	-	-	-	-	-	-	-	-	-	-	-	-	-	-	-
2371	CATGTAATATATCCTCTGAAAACTTA	FE669913.1	-	-	-	-	-	-	-	-	-	-	-	-	-	-	-	-
2372	CATGGCTAAATCTTCTGAAGACACCG	FE669912.1	-	-	-	-	-	-	-	-	-	-	-	-	-	-	-	-
2373	CATGATGCGGCTCTGGATCCTTCAGC	FE669911.1	-	-	-	-	-	-	-	-	-	-	-	-	-	-	-	-
2374	CATGTTAGGAACTTCCTTGAGCCCTG	FE669910.1	-	-	-	-	-	-	-	-	-	-	-	-	-	-	-	-
2375	CATGGAAGCAGAAGAGACTGAACTCA	FE669909.1	-	-	-	-	-	-	-	-	-	-	-	-	-	-	-	-
2376	CATGGTAGTGGAGGAAGGCCTAACCG	FE669907.1	-	-	-	-	-	BF650463	3e-07	0	0	DQ028774	5e-97	Glycine max NAC domain protein NAC6 (NAC6) mRNA, complete cds	NAC6 protein (NAC domain protein NAC6)	Q52QR0_SOYBN	-	-
2378	CATGACGACTCAAATGAGCAAGAAGA	FE669904.1	-	-	-	-	-	-	-	-	-	-	-	-	-	-	-	-
2379	CATGGCTATCTTGTTCTTCATTTTCT	FE669903.1	-	-	-	-	-	-	-	-	-	-	-	-	-	-	-	-
2383	CATGCTGCTTCTTAACATTTGGCACT	FE669898.1	-	-	-	-	-	-	-	-	-	-	-	-	-	-	-	-
2384	CATGCTATCTTTTGGAAGGAAAAGTG	FE669897.1	-	-	-	-	-	-	-	-	-	-	-	-	-	-	-	-
2385	CATGTCATTTCTTACAAGGCTGCATT	FE669896.1	-	-	-	-	-	-	-	-	-	-	-	-	-	-	-	-
2389	CATGCAGAACCTGATAGAAAGATTGG	FE669892.1	-	-	-	-	-	-	-	-	-	-	-	-	-	-	-	-
2390	CATGCAGAGCTGGTACTTGCTCTTCT	FE669888.1	-	-	-	-	-	-	-	-	-	-	-	-	-	-	-	-
2392	CATGTCAATATCTACCTCCTTAACTA	FE669886.1	-	-	-	-	-	-	-	-	-	-	-	-	-	-	-	-
2395	CATGATCAGTCTGATTGCGGTTCACA	FE669882.1	-	-	-	-	-	-	-	-	-	-	-	-	-	-	-	-
2396	CATGTGCTCAAAGTTCCATTTCGACG	FE669881.1	-	-	-	-	-	-	-	-	-	-	-	-	-	-	-	-
2397	CATGCTTCGCATAATTCCTCCGATGG	FE669880.1	-	-	-	-	-	-	-	-	-	-	-	-	-	-	-	-
2398	CATGCTTAGACAAACTAAGGTGTTTC	FE669877.1	-	-	-	-	-	-	-	-	-	-	-	-	-	-	-	-
2399	CATGGTGACTCCTCTGTTGCAGCCAG	FE669876.1	-	-	-	-	-	-	-	-	-	-	-	-	-	-	-	-
2400	CATGTCCCTCCTATATCTTCCACCGT	FE669875.1	-	-	-	-	-	-	-	-	-	-	-	-	-	-	-	-
2402	CATGCCGGATTTGCAAAATCTACAAA	FE669872.1	-	-	-	-	-	-	-	-	-	-	-	-	-	-	-	-
2403	CATGACAGGGAAGGACGGGTTCGTAT	FE669870.1	-	-	-	-	-	-	-	-	-	-	-	-	-	-	-	-
2404	CATGTTGAAGAAACAGCACCACCTCC	FE669869.1	-	-	-	-	-	-	-	-	-	-	-	-	-	-	-	-
2407	CATGCTCAGGATATAAAATGAAAGAG	FE669865.1	-	-	-	-	-	-	-	-	-	-	-	-	-	-	-	-
2408	CATGCATTAGGCAATGTGACCAGCAA	FE669864.1	-	-	-	-	-	CX540765	8e-05	1	0	X54639	0	P. sativum mRNA for chloroplast import receptor p36	Triose phosphate/phosphate translocator, chloroplastic precursor; ( Short=cTPT; AltName	TPT_PEA	-	-
2409	CATGGTTGTCCGCAAACCAGCTCACC	FE669863.1	-	-	-	-	-	-	-	-	-	-	-	-	-	-	-	-
2411	CATGGCCCTAACTACAGCATTAACAA	FE671003.1	-	-	-	-	-	-	-	-	-	-	-	-	-	-	-	-
2413	CATGTTTGCTCTTGCTATACCTTATG	FE670709.1	-	-	-	-	-	BG647142	8e-05	1	0	EU670235	0	Medicago truncatula phosphate transporter 5 gene, promoter region and complete cds	Phosphate transporter 5	A5H2U6_MEDTR	-	-
2416	CATGCAGGAGGTGTGCTTCCTGGGAA	FE670705.1	-	-	-	-	-	-	-	-	-	-	-	-	-	-	-	-
2417	CATGGACTACTTTGCCAAATGCACTA	FE670329.1	8e-07	Cicer arietinum partial mRNA for putative Bet v I family protein (bet gene)	AJ746345	Putative Bet v I family protein (Fragment)	Q6KAV9_CICAR	-	-	-	-	-	-	-	-	-	-	-
2419	CATGCAAAATATCCCTTCACCCTCAC	FE670327.1	-	-	-	-	-	-	-	-	-	-	-	-	-	-	-	-
2420	CATGCTTCAATTGCTTAGTACAAGCA	FE670325.1	-	-	-	-	-	-	-	-	-	-	-	-	-	-	-	-
2422	CATGAAGCCCATAGCATTGGCATATC	FE670323.1	-	-	-	-	-	-	-	-	-	-	-	-	-	-	-	-
2424	CATGTCCCTCACGGCGAAACGACCAA	FE670321.1	8e-07	Cicer arietinum mRNA for elongation factor 1-alpha (clone CanEF1-a2), partial	AJ010225	Elongation factor 1-alpha (Fragment)	Q9SB99_CICAR	-	-	-	-	-	-	-	-	-	-	-
2427	CATGATCCTCATCCTCTGTTTCACTC	FE670700.1	-	-	-	-	-	-	-	-	-	-	-	-	-	-	-	-
2428	CATGGATGGATTTTACATTGCTCCTG	FE670699.1	-	-	-	-	-	DY632554	1e-06	0	0	AY130300	1e-159	Medicago sativa rubisco activase (Rca) mRNA, partial cds	Rubisco activase (Fragment)	Q8GTY4_MEDSA	-	-
2429	CATGGCAGGAAGAGGCAAAACCCTAG	FE670698.1	-	-	-	-	-	-	-	-	-	-	-	-	-	-	-	-
2430	CATGTGTATACTCTCTCCTCCTCAGT	FE670697.1	-	-	-	-	-	-	-	-	-	-	-	-	-	-	-	-
2432	CATGGAACCGCAGACGGAGAAAGAGA	FE670695.1	-	-	-	-	-	-	-	-	-	-	-	-	-	-	-	-
2433	CATGCTCTTGTTAGCTGCTGAGTAAG	FE670694.1	-	-	-	-	-	-	-	-	-	-	-	-	-	-	-	-
2434	CATGGCATCAGCAGCTACAGGGTTTG	FE670693.1	-	-	-	-	-	-	-	-	-	-	-	-	-	-	-	-
2436	CATGTATGATTCAATTTCTCTAACCA	FE670690.1	-	-	-	-	-	-	-	-	-	-	-	-	-	-	-	-
2437	CATGCACTTTTCCCACAAATCTTCTT	FE670316.1	-	-	-	-	-	-	-	-	-	-	-	-	-	-	-	-
2438	CATGCTATGCGTTTTCCCTTTGTTGG	FE670315.1	-	-	-	-	-	BI311073	3e-07	0	0	AY445891	8e-100	Galega orientalis signal peptide peptidase mRNA, partial cds	Signal peptide peptidase (Fragment)	Q6SXP6_9FABA	-	-
2440	CATGTCTATGGTTGAAGGCCCTAAAC	FE670313.1	-	-	-	-	-	-	-	-	-	-	-	-	-	-	-	-
2441	CATGTATCTGTTTCCTTAGCTATATC	FE670312.1	-	-	-	-	-	-	-	-	-	-	-	-	-	-	-	-
2442	CATGTTACTGCTTCAAAGAATCAAAG	FE670311.1	-	-	-	-	-	-	-	-	-	-	-	-	-	-	-	-
2444	CATGGACGGCCCAGATACGTTTGGAA	FE670308.1	8e-07	Cicer arietinum partial mRNA for pectin methylesterase (pme2 gene)	AJ609277	Pectinesterase (Fragment); ( EC=3	Q708X3_CICAR	-	-	-	-	-	-	-	-	-	-	-
2446	CATGCTGGGTTTTTAAATAAGGGTTT	FE670306.1	-	-	-	-	-	-	-	-	-	-	-	-	-	-	-	-
2448	CATGTCTTTAATCGGAGTTTTTCACC	FE670688.1	-	-	-	-	-	-	-	-	-	-	-	-	-	-	-	-
2451	CATGGATAGTGGAAATCGCATTTCCT	FE670682.1	-	-	-	-	-	-	-	-	-	-	-	-	-	-	-	-
2452	CATGCCGGTTCAGAAACAAACCCGAG	FE670680.1	-	-	-	-	-	-	-	-	-	-	-	-	-	-	-	-
2455	CATGATTCAAGGTCACAAGTTATATA	FE670304.1	-	-	-	-	-	-	-	-	-	-	-	-	-	-	-	-
2456	CATGTTTTAACCATTTGAATTAAAAC	FE670303.1	-	-	-	-	-	-	-	-	-	-	-	-	-	-	-	-
2457	CATGATTTGAAGAATTATATGGCTTG	FE670302.1	-	-	-	-	-	CX520926	2e-05	0	0	AF145386	1e-11	Phaseolus vulgaris hypersensitive reaction associated Ca2+-binding protein (HRA32) mRNA, complete cds	Hypersensitive reaction associated Ca2+-binding protein	Q9SWP6_PHAVU	-	-
2460	CATGGAAGAGAGAGGGTGTCTGCCAT	FE670298.1	-	-	-	-	-	-	-	-	-	-	-	-	-	-	-	-
2461	CATGAAGCTAAGTGTTTCAATTTTGG	FE670297.1	-	-	-	-	-	-	-	-	-	-	-	-	-	-	-	-
2463	CATGTCTGAAGAAGACCTTCTTAATG	FE670295.1	-	-	-	-	-	-	-	-	-	-	-	-	-	-	-	-
2464	CATGCATTGCTATAATAAGTTATTGT	FE670294.1	-	-	-	-	-	-	-	-	-	-	-	-	-	-	-	-
2466	CATGTGTACCCATATCCACCACAAAT	FE670676.1	-	-	-	-	-	-	-	-	-	-	-	-	-	-	-	-
2467	CATGAATGGATTATCGAGATTCCCAC	FE670675.1	-	-	-	-	-	-	-	-	-	-	-	-	-	-	-	-
2468	CATGTCCCCTCTCTATCCCCTCCAAA	FE670674.1	-	-	-	-	-	-	-	-	-	-	-	-	-	-	-	-
2469	CATGGTTCAATCACCAAATTGTCAAA	FE670673.1	-	-	-	-	-	-	-	-	-	-	-	-	-	-	-	-
2470	CATGGACTCAACCTTAAACTGTAGAC	FE670672.1	-	-	-	-	-	EV258238	8e-05	1	0	Z25861	0	P.sativum mRNA for T subunit of glycine decarboxylase multi-enzyme complex	Aminomethyltransferase, mitochondrial precursor; ( EC=2.1.2.10; AltName	GCST_PEA	-	-
2471	CATGGTGGAGAAGGTTANCTGTGTGA	FE670671.1	-	-	-	-	-	-	-	-	-	-	-	-	-	-	-	-
2475	CATGCGTTCGCTTTAACAGAAAACTT	FE670293.1	-	-	-	-	-	-	-	-	-	-	-	-	-	-	-	-
2477	CATGTCAAAAATCACTAGCATTCCCA	FE670291.1	-	-	-	-	-	-	-	-	-	-	-	-	-	-	-	-
2478	CATGGTTTCCTGATGAGGATACATAT	FE670290.1	-	-	-	-	-	-	-	-	-	-	-	-	-	-	-	-
2483	CATGGATAGATCACCCAGGTGCGGGT	FE670284.1	-	-	-	-	-	-	-	-	-	-	-	-	-	-	-	-
2484	CATGGCTTAGGCCATTGTTTTATGTA	FE670283.1	-	-	-	-	-	BQ151720	8e-05	1	0	AJ871579	5e-51	Glycine max mRNA for beta-amylase (bmy2 gene)	Beta-amylase; ( EC=3.2.1.2)	Q5F305_SOYBN	-	-
2486	CATGCTCCTTCTTAAAGTAACCAGAA	FE670665.1	-	-	-	-	-	-	-	-	-	-	-	-	-	-	-	-
2490	CATGTGGAAAGTTGGAGACGAGAAAT	FE670661.1	8e-07	Cicer arietinum WRKY family transcription factor (WRKY1) mRNA, complete cds	EU049488	-	-	-	-	-	-	-	-	-	-	-	-	-
2491	CATGGGCGGGTTCTTCATCCCAAATT	FE670659.1	-	-	-	-	-	-	-	-	-	-	-	-	-	-	-	-
2492	CATGTTTTTCACCTTTGTGTTCCTCT	FE670658.1	-	-	-	-	-	-	-	-	-	-	-	-	-	-	-	-
2493	CATGCCGTAGAGCCAGCAAAATCAGC	FE670657.1	-	-	-	-	-	-	-	-	-	-	-	-	-	-	-	-
2494	CATGGCGAAAATAGCTGCTTCTTCGG	FE670655.1	-	-	-	-	-	-	-	-	-	-	-	-	-	-	-	-
2495	CATGATTGAGACTCCTTTATGTCAAC	FE670654.1	-	-	-	-	-	-	-	-	-	-	-	-	-	-	-	-
2497	CATGTCAAAAAATTGCTCTTGTCCCA	FE670280.1	-	-	-	-	-	-	-	-	-	-	-	-	-	-	-	-
2499	CATGCAAGCACATATATAAGTTAATT	FE670278.1	-	-	-	-	-	-	-	-	-	-	-	-	-	-	-	-
2500	CATGGCAATCATTGCATCGGGAGTTG	FE670275.1	-	-	-	-	-	-	-	-	-	-	-	-	-	-	-	-
2501	CATGTCGGACGCGTTTTGCAGCGATT	FE670274.1	-	-	-	-	-	-	-	-	-	-	-	-	-	-	-	-
2503	CATGCCTGGGCATAGCTTTAATGTGG	FE670272.1	-	-	-	-	-	-	-	-	-	-	-	-	-	-	-	-
2504	CATGCAGCTGAAACACCTTTCCTTTG	FE670271.1	-	-	-	-	-	-	-	-	-	-	-	-	-	-	-	-
2505	CATGAACTTCAGATTTCGACTTGTCA	FE670270.1	-	-	-	-	-	-	-	-	-	-	-	-	-	-	-	-
2507	CATGAAAGAAACAAACTTGAATTCTT	FE670650.1	-	-	-	-	-	-	-	-	-	-	-	-	-	-	-	-
2508	CATGCGACGTTTTTAGCTCCACAACC	FE670649.1	-	-	-	-	-	-	-	-	-	-	-	-	-	-	-	-
2509	CATGCAACAGTTCGTTTTTTCCTTCT	FE670648.1	-	-	-	-	-	-	-	-	-	-	-	-	-	-	-	-
2510	CATGTCTTGATATCGACTCCATTTCA	FE670647.1	-	-	-	-	-	-	-	-	-	-	-	-	-	-	-	-
2512	CATGTAACACTTCGGCATTCCCTACC	FE670644.1	-	-	-	-	-	-	-	-	-	-	-	-	-	-	-	-
2515	CATGAGACTTCAAGAGCAAGGAAAAA	FE670266.1	-	-	-	-	-	-	-	-	-	-	-	-	-	-	-	-
2516	CATGGGATTTGTGGAAGGCTAAAGGG	FE670265.1	-	-	-	-	-	-	-	-	-	-	-	-	-	-	-	-
2519	CATGCCGTGTCTGAAGGAACTAAGGC	FE670261.1	8e-07	Cicer arietinum mRNA for histone H2B	AJ400863	Histone H2B	Q9M3H6_CICAR	-	-	-	-	-	-	-	-	-	-	-
2520	CATGTAATATTTGCCAAAATACTCAG	FE670260.1	-	-	-	-	-	-	-	-	-	-	-	-	-	-	-	-
2521	CATGGATTAGATGAAAAGACAAGTGC	FE670259.1	8e-07	Lupinus albus mRNA for ATP citrate lyase b-subunit (aclb gene)	AJ344108	ATP citrate lyase b-subunit; ( EC=4	Q93YH3_LUPAL	AW981421	3e-07	0	0	AJ344108	0	Lupinus albus mRNA for ATP citrate lyase b-subunit (aclb gene)	ATP citrate lyase b-subunit; ( EC=4.1.3.8)	Q93YH3_LUPAL	correlated ID	-
2524	CATGCGCTCTAAACCGGAAAAACTTC	FE670639.1	-	-	-	-	-	-	-	-	-	-	-	-	-	-	-	-
2525	CATGATATTCTCAAACGCTGTGAAAT	FE670636.1	-	-	-	-	-	-	-	-	-	-	-	-	-	-	-	-
2526	CATGGTATGGTGTAGACAGTGTGTAA	FE670633.1	-	-	-	-	-	-	-	-	-	-	-	-	-	-	-	-
2527	CATGCAGCACCTGTATGAAAGTCTGT	FE670631.1	5e-05	Arachis hypogaea cultivar JL24 16S ribosomal RNA gene, partial sequence; mitochondrial	EU982414	-	-	-	-	-	-	-	-	-	-	-	-	-
2528	CATGGATCGTGAGTCCTTCATTTTTT	FE670630.1	-	-	-	-	-	-	-	-	-	-	-	-	-	-	-	-
2529	CATGTCTTACTGTGATCACAACCAAA	FE670257.1	-	-	-	-	-	-	-	-	-	-	-	-	-	-	-	-
2530	CATGATGATTCATTTCCTATTAGTAT	FE670256.1	8e-07	-	-	-	-	CA918654	8e-05	1	0	AC145820	0	Cicer arietinum strain WR-315, cultivar clone cpchlor map chloroplast, complete sequence	-	-	-	-
2531	CATGCGGCCAAACGAACTTCCACATT	FE670255.1	-	-	-	-	-	-	-	-	-	-	-	-	-	-	-	-
2533	CATGCAGACAACCCATCATCCAATGC	FE670253.1	-	-	-	-	-	-	-	-	-	-	-	-	-	-	-	-
2535	CATGTGGGGCCTACTCCGCTCCCACA	FE670251.1	-	-	-	-	-	-	-	-	-	-	-	-	-	-	-	-
2536	CATGTTCCCTCCACCTCTGATGTAGG	FE670249.1	-	-	-	-	-	-	-	-	-	-	-	-	-	-	-	-
2537	CATGACCAATAAACACAACATTTAAG	FE670248.1	-	-	-	-	-	-	-	-	-	-	-	-	-	-	-	-
2538	CATGACAATGGGGGTAAGGAATTGAA	FE670247.1	-	-	-	-	-	-	-	-	-	-	-	-	-	-	-	-
2541	CATGAAGTCTATCATTCCTTGGGCCC	FE670628.1	-	-	-	-	-	BQ155060	3e-07	0	0	AF169830	2e-66	Glycine max auxin-induced protein ali50 mRNA, partial cds	Auxin-induced protein ali50 (Fragment)	Q9SWA5_SOYBN	-	-
2542	CATGACCATAGTCAACGATGAGTCAA	FE670626.1	8e-07	Cicer arietinum clone CaHa4 glyceraldehyde 3-phosphate dehydrogenase mRNA, partial cds	EF375948	Glyceraldehyde 3-phosphate dehydrogenase (Fragment)	B0L628_CICAR	-	-	-	-	-	-	-	-	-	-	-
2544	CATGTGTGTTGTATGAGTGTACCACT	FE670621.1	-	-	-	-	-	-	-	-	-	-	-	-	-	-	-	-
2545	CATGTCTAATGAGTAATCATAGTCTT	FE670620.1	-	-	-	-	-	-	-	-	-	-	-	-	-	-	-	-
2546	CATGTCCCATTTTAGGCCTCTTTGTT	FE670618.1	-	-	-	-	-	DY617349	3e-07	0	0	AY687390	3e-12	Glycine max putative receptor-like protein kinase 3 mRNA, complete cds	Putative receptor-like protein kinase 3	Q49N13_SOYBN	-	-
2547	CATGGCTTCAGCAAATTTTGTCTTGA	FE670243.1	-	-	-	-	-	-	-	-	-	-	-	-	-	-	-	-
2551	CATGTCAGTCACCTCTCTAACAAGAT	FE670235.1	-	-	-	-	-	-	-	-	-	-	-	-	-	-	-	-
2552	CATGGTATCACCAGGTAATTCACAAA	FE669572.1	-	-	-	-	-	-	-	-	-	-	-	-	-	-	-	-
2553	CATGGCAAACCCAGGATCAAACCCAG	FE669571.1	-	-	-	-	-	-	-	-	-	-	-	-	-	-	-	-
2554	CATGTTTGGACTTTTAGCCCATTGCT	FE669567.1	-	-	-	-	-	-	-	-	-	-	-	-	-	-	-	-
2555	CATGTGTTGTTCAAAACCCAGATCTT	FE669566.1	-	-	-	-	-	-	-	-	-	-	-	-	-	-	-	-
2556	CATGCCCCTAAGGGCACTGTCATAAT	FE669565.1	-	-	-	-	-	-	-	-	-	-	-	-	-	-	-	-
2557	CATGTTGCGGCGGAGGATATGCCGGG	FE669564.1	-	-	-	-	-	-	-	-	-	-	-	-	-	-	-	-
2560	CATGCAGGCCGACAAGCAGAATTGCT	FE669561.1	-	-	-	-	-	-	-	-	-	-	-	-	-	-	-	-
2561	CATGATGATAATATCATCATCTTCAT	FE669560.1	-	-	-	-	-	-	-	-	-	-	-	-	-	-	-	-
2564	CATGTCTGAAAAAGACCTTCTTAATG	FE669557.1	-	-	-	-	-	-	-	-	-	-	-	-	-	-	-	-
2565	CATGAAATGATGCACTTACGTGACCT	FE669556.1	8e-07	Sesbania rostrata cDNA-AFLP fragment 018BT22M41-318.5 mRNA sequence	EF415825	-	-	-	-	-	-	-	-	-	-	-	-	-
2569	CATGGTAGTATCTCCCTGTAGGAACA	FE669551.1	-	-	-	-	-	-	-	-	-	-	-	-	-	-	-	-
2570	CATGCCACCCATTCCACCAGGCATAG	FE669550.1	-	-	-	-	-	-	-	-	-	-	-	-	-	-	-	-
2571	CATGATTATTTTTTGGAATCATTCAG	FE669549.1	-	-	-	-	-	-	-	-	-	-	-	-	-	-	-	-
2573	CATGGACCCGGTGAAATTGAATTCTC	FE669547.1	-	-	-	-	-	ES611215	3e-07	0	0	DQ219393	9e-179	Leucaena leucocephala clone A516 mitochondrial sequence	-	-	-	-
2574	CATGAATTTGTTGAAAATGTTCCGGA	FE669546.1	-	-	-	-	-	-	-	-	-	-	-	-	-	-	-	-
2575	CATGATTGCTGTCGTCTATATGAGGT	FE669544.1	-	-	-	-	-	-	-	-	-	-	-	-	-	-	-	-
2576	CATGTGAGTGGTTGTNGGGAAGTAAA	FE669542.1	-	-	-	-	-	-	-	-	-	-	-	-	-	-	-	-
2579	CATGCTAGATGGGCAATGCTTGGTGC	FE669537.1	-	-	-	-	-	CX542324	8e-05	1	0	AF439282	3e-18	Retama raetam chl a/b-binding protein mRNA, partial cds	Chl a/b-binding protein (Fragment)	Q8W537_9FABA	-	-
2581	CATGGCTGTGACCTGGGAGGAAAAGA	FE669535.1	-	-	-	-	-	-	-	-	-	-	-	-	-	-	-	-
2583	CATGTACCAATGGTTGGTAGGAGAAT	FE669531.1	-	-	-	-	-	-	-	-	-	-	-	-	-	-	-	-
2584	CATGCAAATCAATTTCATAAATTGTA	FE669527.1	-	-	-	-	-	-	-	-	-	-	-	-	-	-	-	-
2585	CATGCTAATGTATCCAGAGCGTAGGC	FE669526.1	8e-07	Glycyrrhiza uralensis 18S ribosomal RNA, partial sequence	EF571296	-	-	CX531351	3e-07	0	0	AJ577394	0	Cicer arietinum 18S rRNA gene, 5.8S rRNA gene, IGS, ITS1 and ITS2, clone CanrDNA	-	-	-	Uncorrelated annotation
2586	CATGTGATATAACGAGGGGGAAATTG	FE670617.1	-	-	-	-	-	-	-	-	-	-	-	-	-	-	-	-
2587	CATGGGTATGTTGTGCCAGGGGAGAG	FE670616.1	-	-	-	-	-	-	-	-	-	-	-	-	-	-	-	-
2589	CATGAATCAGATTTGGGTTGCGCAAA	FE670614.1	-	-	-	-	-	-	-	-	-	-	-	-	-	-	-	-
2591	CATGGTAATCTGGTACAATATCAAAG	FE670612.1	-	-	-	-	-	-	-	-	-	-	-	-	-	-	-	-
2592	CATGTTACAAATTTCCCAGAATAATA	FE670611.1	-	-	-	-	-	-	-	-	-	-	-	-	-	-	-	-
2594	CATGTGACCCAGCTTTTGCAGCACAA	FE670608.1	-	-	-	-	-	-	-	-	-	-	-	-	-	-	-	-
2595	CATGTCGCAGTGTATTGCGCCCCCAT	FE670607.1	-	-	-	-	-	-	-	-	-	-	-	-	-	-	-	-
2597	CATGACTCGTAATATCCACTGAACTA	FE669861.1	-	-	-	-	-	-	-	-	-	-	-	-	-	-	-	-
2598	CATGGATGAAGCGGCCATATTTGCAA	FE669857.1	8e-07	Cicer arietinum mRNA for chlorophyll a/b binding protein	AJ131044	Chlorophyll a/b binding protein precursor	Q9ZP08_CICAR	-	-	-	-	-	-	-	-	-	-	-
2599	CATGAGCTTTTGAAATATAAAGGTCC	FE669856.1	-	-	-	-	-	-	-	-	-	-	-	-	-	-	-	-
2600	CATGAGTGTTGTTTTTCGGCCTAGGA	FE669854.1	-	-	-	-	-	-	-	-	-	-	-	-	-	-	-	-
2602	CATGTTTTATTTTAACCTAGGATTTT	FE669852.1	-	-	-	-	-	-	-	-	-	-	-	-	-	-	-	-
2606	CATGTAGGATTTATGTTTATCTTAGA	FE670604.1	-	-	-	-	-	-	-	-	-	-	-	-	-	-	-	-
2607	CATGGACAAGGTTGGACGATAAAGTA	FE670602.1	-	-	-	-	-	-	-	-	-	-	-	-	-	-	-	-
2608	CATGAGCCCACACATTAAATATGCAA	FE670601.1	-	-	-	-	-	-	-	-	-	-	-	-	-	-	-	-
2610	CATGGATCCCACCAAGAAGCGCAAGC	FE670599.1	-	-	-	-	-	-	-	-	-	-	-	-	-	-	-	-
2611	CATGAAACTTTGCCTTAGCCAACAGC	FE670594.1	-	-	-	-	-	BG457106	8e-05	1	0	AC160454	5e-05	Glycine max clone gmw1-15k6, complete sequence	-	-	-	-
2612	CATGGTTTCCCAGTGAAGAGGACCAC	FE669849.1	-	-	-	-	-	-	-	-	-	-	-	-	-	-	-	-
2613	CATGATAGAATTAGACGCAGAATCTC	FE669848.1	-	-	-	-	-	CA858239	3e-07	0	0	AF276228	0	Pisum sativum cultivar Solara putative heme oxygenase 1 precursor (HO1) mRNA, complete cds; nuclear gene for chloroplast product	Putative heme oxygenase 1 precursor	Q93VB1_PEA	-	-
2614	CATGAGATGGATATTATTATTGTTGT	FE669847.1	8e-07	Cicer arietinum mRNA for for hypothetical protein, clone Can47	AJ404640	Putative uncharacterized protein	Q9LEN4_CICAR	-	-	-	-	-	-	-	-	-	-	-
2617	CATGCTTGATATGCTGCTTCTTTGTT	FE669842.1	-	-	-	-	-	-	-	-	-	-	-	-	-	-	-	-
2619	CATGCATATAGATAGCTACAATAACT	FE669840.1	-	-	-	-	-	-	-	-	-	-	-	-	-	-	-	-
2620	CATGACGCTCTCCCGCAGAAAGAAAA	FE669839.1	-	-	-	-	-	-	-	-	-	-	-	-	-	-	-	-
2621	CATGATGAAGAGATCTATTAGAATGC	FE669838.1	-	-	-	-	-	-	-	-	-	-	-	-	-	-	-	-
2626	CATGAAGAAGATGAGTACGATGAGGA	FE670587.1	-	-	-	-	-	-	-	-	-	-	-	-	-	-	-	-
2627	CATGGAGGTAAGGCGGTTGCAAAGTT	FE670586.1	-	-	-	-	-	-	-	-	-	-	-	-	-	-	-	-
2628	CATGAAATTGAATTTNATGGGGTAAA	FE670585.1	-	-	-	-	-	-	-	-	-	-	-	-	-	-	-	-
2629	CATGCAAAGCAGTGAGTATGAAGTTA	FE670584.1	8e-07	Cicer arietinum mRNA for putative universal stress protein (Usp gene)	AJ630657	Putative universal stress protein	Q700A7_CICAR	-	-	-	-	-	-	-	-	-	-	-
2632	CATGTTTGATTTCAGCCAATTGAAAA	FE669836.1	-	-	-	-	-	-	-	-	-	-	-	-	-	-	-	-
2633	CATGGTGGGCTTATCCCGGTTCGCTC	FE669835.1	8e-07	Cicer arietinum 18S ribosomal RNA gene, partial sequence; internal transcribed spacer 1, 5.8S ribosomal RNA gene, and internal transcribed spacer 2, complete sequence; and 26S ribosomal RNA gene, partial sequence	AY594660	-	-	-	-	-	-	-	-	-	-	-	-	-
2634	CATGGCTCAACAAAGCAGCCACACCG	FE669833.1	-	-	-	-	-	ES613661	8e-05	1	0	EF571299	0	Glycyrrhiza uralensis 26S ribosomal RNA, partial sequence	-	-	-	-
2636	CATGTTACTTTGTGGGCTCATTCCCT	FE669829.1	-	-	-	-	-	-	-	-	-	-	-	-	-	-	-	-
[truncated: 1,546 more rows]

## Sheet: Blast I vs III
									11	5	6	5	17	6	7	8
In silico Tag information			In silico Tag direct annotation NCBI nr (best hit)					Best Homology hit in M. truncatula TIGR gene indices				Annotation after blasting the corresponding M.truncatula best homology EST hit (TIGR GIs) against the nr nucleotide database (NCBI)					Correlation between in silico chickpea tags and M.truncatula ESTs (TIGR) annotation
Internal ID	In silico Tag sequence	db ID	E-value	NCBI description (entrez) excluding annonymous hits	gb / dbj / emb ID	Protein name (Uniprot)	Uniprot ID	db	E-value	mismatches	gaps	gb/emb/dbj	E-Value	Nucleotide description (entrez) excluding annonymous hits	Protein name (uniprot)	Uniprot ID	Direct ID direct correlation	Name/description correlation
1	CATGGTATGGTATTGAGCAAGAGTAT	FE672153.1	8e-07	Arachis hypogaea clone 1P23 glutamine synthetase GS56 mRNA, partial cds	DQ889533	-	-	-	-	-	-	-	-	-	-	-	-	-
2	CATGGCACCTTCTGTGAAATTACAAA	FE672151.1	-	-	-	-	-	TC114976	1e-07	0	0	EU165372	0	Glycine max alanine aminotransferase 2 (AlaAT2) mRNA, complete cds	Alanine aminotransferase 2	A8IKE5_SOYBN	-	-
3	CATGCTATGTCACTGTTAGAGGTGAT	FE672148.1	5e-05	Cicer arietinum mRNA for ribosomal protein RL5 (rl5 gene)	AJ515029	Ribosomal protein RL5	Q8GTE2_CICAR	-	-	-	-	-	-	-	-	-	-	-
4	CATGCAGCTGAATCTGATCTCTCACC	FE672147.1	-	-	-	-	-	-	-	-	-	-	-	-	-	-	-	-
5	CATGATTTAGACTTAGGCCTTATTTC	FE672145.1	-	-	-	-	-	-	-	-	-	-	-	-	-	-	-	-
6	CATGTGGATGTTGAGTTTGCAACAGA	FE672144.1	-	-	-	-	-	-	-	-	-	-	-	-	-	-	-	-
7	CATGGGGCATACCACGGAGGGAGTGG	FE672143.1	-	-	-	-	-	-	-	-	-	-	-	-	-	-	-	-
8	CATGGTAATACGAAGCATTAAGGGTG	FE672142.1	-	-	-	-	-	-	-	-	-	-	-	-	-	-	-	-
9	CATGCACTCAAATATTTCATTTGCTA	FE672141.1	-	-	-	-	-	-	-	-	-	-	-	-	-	-	-	-
10	CATGGTTGTAGACAATGTTTTAGAGG	FE672140.1	-	-	-	-	-	-	-	-	-	-	-	-	-	-	-	-
11	CATGGAGAAAGTTGCTTATGAATAAA	FE672139.1	-	-	-	-	-	-	-	-	-	-	-	-	-	-	-	-
12	CATGAGAACCCTTCTGTCGATGCTCT	FE672138.1	-	-	-	-	-	-	-	-	-	-	-	-	-	-	-	-
13	CATGGGAAGTCACGGCTATGGTGTCA	FE672137.1	-	-	-	-	-	-	-	-	-	-	-	-	-	-	-	-
14	CATGGTCTCTTCCATCACAAAAAAAA	FE672136.1	-	-	-	-	-	-	-	-	-	-	-	-	-	-	-	-
15	CATGTTGCGGCGGAGGATATGCCGGA	FE672135.1	-	-	-	-	-	-	-	-	-	-	-	-	-	-	-	-
16	CATGAAATGTTACACAATATATCCCA	FE672134.1	-	-	-	-	-	-	-	-	-	-	-	-	-	-	-	-
17	CATGACTAGAATTCCCATTAGCTCTT	FE672133.1	-	-	-	-	-	-	-	-	-	-	-	-	-	-	-	-
18	CATGCTGCCACACCAACTTCCACATT	FE672132.1	-	-	-	-	-	-	-	-	-	-	-	-	-	-	-	-
19	CATGCTCTTCATAAGAAATCTCTTGA	FE672131.1	-	-	-	-	-	TC113594	1e-07	0	0	DQ889525	2e-58	Arachis hypogaea clone 1W74 fiber annexin mRNA, partial cds	-	-	-	-
20	CATGACTCTGATCAACGAACCGAAGC	FE672130.1	-	-	-	-	-	-	-	-	-	-	-	-	-	-	-	-
21	CATGCTCAAAGTATCCTTGCTATATG	FE672129.1	8e-07	Cicer arietinum mRNA for chlorophyll a/b binding protein	AJ131044	Chlorophyll a/b binding protein precursor	Q9ZP08_CICAR	-	-	-	-	-	-	-	-	-	-	-
22	CATGTTGGTGATGGAAGGGAAGGTTG	FE672128.1	-	-	-	-	-	-	-	-	-	-	-	-	-	-	-	-
23	CATGGTAAAGATGGATTAGGGAACAT	FE672127.1	-	-	-	-	-	-	-	-	-	-	-	-	-	-	-	-
24	CATGTTGGTGAATTAGGTGCTGCCAC	FE672126.1	-	-	-	-	-	-	-	-	-	-	-	-	-	-	-	-
25	CATGATGGTAATGTTGGTACTTTTTT	FE672125.1	-	-	-	-	-	-	-	-	-	-	-	-	-	-	-	-
26	CATGTAAAATGTNAGCAAGCTTGGAC	FE672124.1	-	-	-	-	-	-	-	-	-	-	-	-	-	-	-	-
27	CATGTGTGGAGAGCAGGGGATGAGTC	FE672123.1	-	-	-	-	-	-	-	-	-	-	-	-	-	-	-	-
28	CATGACGCGTCGGAGTTCATCCTCCG	FE672122.1	-	-	-	-	-	-	-	-	-	-	-	-	-	-	-	-
29	CATGGGTATTCAGAGCTTGGTTGACA	FE672121.1	8e-07	Cicer arietinum mRNA for class I chitinase	AJ012821	Class I chitinase precursor; ( EC=3	Q9ZP10_CICAR	-	-	-	-	-	-	-	-	-	-	-
30	CATGGACGAAACAGGAGCTGGGCTGC	FE672119.1	-	-	-	-	-	-	-	-	-	-	-	-	-	-	-	-
31	CATGACCAGGCAATGCCGACATCGGA	FE672118.1	-	-	-	-	-	-	-	-	-	-	-	-	-	-	-	-
32	CATGGCTCAGCGGATCGTCTCCGCCG	FE672115.1	-	-	-	-	-	-	-	-	-	-	-	-	-	-	-	-
33	CATGGCTGCTGCCATCAAGGATAGAA	FE672114.1	8e-07	Pisum sativum mRNA for GTP-binding protein, complete cds, clone:pra9B	D12549	GTP-binding protein	Q08154_PEA	TC126086	1e-07	0	0	D12549	0	Pisum sativum mRNA for GTP-binding protein, complete cds, clone:pra9B	GTP-binding protein	Q08154_PEA	ID direct correlation	-
34	CATGGCTTGCAATTCAACACCCCTCT	FE672111.1	-	-	-	-	-	-	-	-	-	-	-	-	-	-	-	-
35	CATGGACCAAACTTGGGTTACCCAAG	FE672109.1	8e-07	Cicer arietinum mRNA for chlorophyll a/b binding protein	AJ131044	Chlorophyll a/b binding protein precursor	Q9ZP08_CICAR	BQ151210	1e-07	0	0	AF072931	0	Medicago sativa chlorophyll a/b binding protein (CARCAB1) mRNA, complete cds	Chlorophyll a/b binding protein	O81391_MEDSA	no	Correlated protein name
36	CATGTTTGAAACAATCTAAGATAATA	FE672108.1	-	-	-	-	-	-	-	-	-	-	-	-	-	-	-	-
37	CATGGTTGGGCTAATTTTGCCAAAAT	FE672107.1	-	-	-	-	-	-	-	-	-	-	-	-	-	-	-	-
38	CATGCCCCCTACAGGAGGATAACGAT	FE672105.1	-	-	-	-	-	-	-	-	-	-	-	-	-	-	-	-
39	CATGTACTGTCCAATTCTTGACAAGA	FE672103.1	-	-	-	-	-	-	-	-	-	-	-	-	-	-	-	-
40	CATGAAAAAGCTCGAAGAAGCAGTGA	FE672100.1	-	-	-	-	-	-	-	-	-	-	-	-	-	-	-	-
41	CATGAGACCACCTCAATCACAGGGTA	FE672098.1	-	-	-	-	-	-	-	-	-	-	-	-	-	-	-	-
42	CATGGAAGCATACTTAAGATGCAGCG	FE672096.1	-	-	-	-	-	-	-	-	-	-	-	-	-	-	-	-
43	CATGACACGTTTAACCTACACGCTCG	FE672095.1	-	-	-	-	-	-	-	-	-	-	-	-	-	-	-	-
44	CATGCTTTTCCATTAGTGAATTAAGA	FE672094.1	-	-	-	-	-	-	-	-	-	-	-	-	-	-	-	-
45	CATGACTGGTTCTTGTTTCGCCGCCG	FE672093.1	-	-	-	-	-	-	-	-	-	-	-	-	-	-	-	-
46	CATGCTCTCATTGGCGAGCCTACTAG	FE672092.1	-	-	-	-	-	-	-	-	-	-	-	-	-	-	-	-
48	CATGTTCCTCGCCGATTCAAGAGTGG	FE672090.1	-	-	-	-	-	-	-	-	-	-	-	-	-	-	-	-
49	CATGAATTTCCTTTCACTTCCGTGAT	FE672089.1	-	-	-	-	-	-	-	-	-	-	-	-	-	-	-	-
50	CATGGTGAAGAAGAATATAAGACCAT	FE672088.1	-	-	-	-	-	-	-	-	-	-	-	-	-	-	-	-
51	CATGGAGTCAAATTGGGACTTATGTC	FE672087.1	-	-	-	-	-	-	-	-	-	-	-	-	-	-	-	-
53	CATGATATTATTGTCCTGAGGAGCTC	FE672084.1	-	-	-	-	-	-	-	-	-	-	-	-	-	-	-	-
54	CATGACAGACTTGTATAATAACTTGC	FE672083.1	-	-	-	-	-	-	-	-	-	-	-	-	-	-	-	-
55	CATGACCATAATTACCACCACCATTG	FE672082.1	8e-07	Cicer arietinum mRNA for glycine-rich protein 2, partial	AJ012829	Glycine-rich protein 2 (Fragment)	Q9ZRV2_CICAR	-	-	-	-	-	-	-	-	-	-	-
56	CATGACACCTTTGACTTCAGAAACCT	FE672080.1	-	-	-	-	-	-	-	-	-	-	-	-	-	-	-	-
57	CATGTTTACTGGGCCTCGGTGCCTGC	FE672079.1	-	-	-	-	-	-	-	-	-	-	-	-	-	-	-	-
59	CATGGTACCTTTCCAACCTACCAGCC	FE672077.1	-	-	-	-	-	-	-	-	-	-	-	-	-	-	-	-
60	CATGATGATGAGCCTCCTCTCTCCCA	FE672075.1	-	-	-	-	-	-	-	-	-	-	-	-	-	-	-	-
61	CATGGATTCTTTTTTTAACCCTTTGC	FE672074.1	-	-	-	-	-	-	-	-	-	-	-	-	-	-	-	-
62	CATGAATGCTCCATCTGTCATAAATC	FE672073.1	-	-	-	-	-	-	-	-	-	-	-	-	-	-	-	-
63	CATGGCCATTAAGGCTCAGATCTATG	FE672072.1	-	-	-	-	-	-	-	-	-	-	-	-	-	-	-	-
64	CATGTAACGGCCTTCTCTGCATCTGT	FE672071.1	-	-	-	-	-	-	-	-	-	-	-	-	-	-	-	-
65	CATGGGAGGATGAAGAGGAGTCCACT	FE672068.1	-	-	-	-	-	-	-	-	-	-	-	-	-	-	-	-
66	CATGCAAGAGCCAGTTGTGAAGATGT	FE672067.1	-	-	-	-	-	-	-	-	-	-	-	-	-	-	-	-
67	CATGTGAAATCAGCATCATCTCTACC	FE672063.1	8e-07	Medicago sativa subsp. falcata S-adenosyl-L-methionine synthetase (SAMS) mRNA, complete cds	EF408868	S-adenosylmethionine synthetase; ( EC=2	A4ULF8_MEDFA	TC117283	1e-07	0	0	EF408868	0	Medicago sativa subsp. falcata S-adenosyl-L-methionine synthetase (SAMS) mRNA, complete cds	S-adenosylmethionine synthetase; ( EC=2.5.1.6)	A4ULF8_MEDFA	ID direct correlation	-
68	CATGCCGCTGGCTCGCAAAATCGAGG	FE672062.1	-	-	-	-	-	-	-	-	-	-	-	-	-	-	-	-
69	CATGATGATGACTTGGGAAGTGAAGT	FE672061.1	8e-07	Cicer arietinum mRNA for elongation factor 1-alpha (EF1-a)	AJ004960	Elongation factor 1-alpha (EF1-a) (Fragment)	O81921_CICAR	TC114105	1e-07	0	0	AJ222579	0	Vicia faba mRNA for elongation factor 1-alpha (EF1-a)	Elongation factor 1-alpha; ( Short=EF-1-alpha)	EF1A_VICFA	no	Correlated protein name
70	CATGAGATGAGACAATGATCTTCTAA	FE672060.1	-	-	-	-	-	-	-	-	-	-	-	-	-	-	-	-
71	CATGAGTGTTACCTAGCTTTGCCAGT	FE672059.1	-	-	-	-	-	-	-	-	-	-	-	-	-	-	-	-
72	CATGTAGTGCAAGAAGATGATGATGA	FE672058.1	-	-	-	-	-	-	-	-	-	-	-	-	-	-	-	-
73	CATGGAGCCAATGGTAACACCAAGGA	FE673400.1	-	-	-	-	-	-	-	-	-	-	-	-	-	-	-	-
74	CATGAAGTGCTGGTGATAGGTATTTT	FE673399.1	-	-	-	-	-	-	-	-	-	-	-	-	-	-	-	-
75	CATGGACATAAATTCAAGTTGTTTCG	FE673398.1	-	-	-	-	-	-	-	-	-	-	-	-	-	-	-	-
76	CATGAAAAAGAAAAAAGCTTGGGGTG	FE673397.1	-	-	-	-	-	-	-	-	-	-	-	-	-	-	-	-
78	CATGTTCACCACGTTTCTTCTTAACC	FE673391.1	-	-	-	-	-	-	-	-	-	-	-	-	-	-	-	-
79	CATGTTTTGGCCCCCCCCAAAAAAAA	FE673390.1	-	-	-	-	-	-	-	-	-	-	-	-	-	-	-	-
80	CATGGCTCTCTCTTCGGGAACTTTAG	FE672921.1	-	-	-	-	-	-	-	-	-	-	-	-	-	-	-	-
81	CATGCAATATATACCCTAGTTGCCAA	FE672919.1	-	-	-	-	-	-	-	-	-	-	-	-	-	-	-	-
82	CATGGTGGTGACGGGTGACGGACAAT	FE672917.1	-	-	-	-	-	-	-	-	-	-	-	-	-	-	-	-
83	CATGGATTGTGATTAGCACTGTCGCG	FE672916.1	-	-	-	-	-	-	-	-	-	-	-	-	-	-	-	-
84	CATGAGCTCCGCGAGATCAGAAATCT	FE672914.1	-	-	-	-	-	-	-	-	-	-	-	-	-	-	-	-
85	CATGGGTTTTGATGGCCAATGATGTG	FE672913.1	-	-	-	-	-	-	-	-	-	-	-	-	-	-	-	-
86	CATGCATAGTGCCTCTTTAATAGTTT	FE672912.1	-	-	-	-	-	-	-	-	-	-	-	-	-	-	-	-
87	CATGACGGAAACTGGCTCAGGATACA	FE672911.1	-	-	-	-	-	-	-	-	-	-	-	-	-	-	-	-
88	CATGGTGTGGGCCCGCATAGTAAAGT	FE672910.1	-	-	-	-	-	-	-	-	-	-	-	-	-	-	-	-
89	CATGGCGGATGTGATGGTAATGAAAG	FE671673.1	-	-	-	-	-	-	-	-	-	-	-	-	-	-	-	-
90	CATGGCTACACAAGCTCTAGTGTCGT	FE671672.1	3e-06	Pisum sativum chloroplast photosystem I 24 kDa light harvesting protein (lhca3) mRNA, complete cds	L19651	Chlorophyll a-b binding protein 3, chloroplastic precursor; (AltName: Full=LHCII type III CAB-3)	CB23_PEA	TC120562	1e-07	0	0	L19651	0	Pisum sativum chloroplast photosystem I 24 kDa light harvesting protein (lhca3) mRNA, complete cds	Chlorophyll a-b binding protein 3, chloroplastic precursor; (AltName: Full=LHCII type III CAB-3)	CB23_PEA	ID direct correlation	-
91	CATGGAGTTGATCAAACCACAACAGA	FE671669.1	8e-07	Cicer pinnatifidum dehydrin 1 mRNA, complete cds	AY170010	Dehydrin 1	Q8GUS4_9FABA	-	-	-	-	-	-	-	-	-	-	-
92	CATGGAGGAGGATATTGTGGAAATGG	FE671668.1	8e-07	Cicer arietinum mRNA for glycine-rich protein 1	AJ007556	Glycine-rich protein 1 (Fragment)	O81929_CICAR	-	-	-	-	-	-	-	-	-	-	-
93	CATGTGGACGTGTAAGTGCTGCTCTT	FE671663.1	-	-	-	-	-	-	-	-	-	-	-	-	-	-	-	-
94	CATGGTGATGCAAGTGTTGGGTGCTA	FE673388.1	8e-07	Pisum sativum trg-31 gene	Z18288	Probable aquaporin PIP-type 7a; (AltName: Full=Turgor-responsive protein 7a; AltName: Full=Turgor-responsive protein 31)	PIP2_PEA	-	-	-	-	-	-	-	-	-	-	-
95	CATGTGGGGGATATGAAATCTTCAGT	FE673386.1	-	-	-	-	-	-	-	-	-	-	-	-	-	-	-	-
96	CATGTGTCAGGGAGGTGACTTCACCG	FE673385.1	8e-07	Cicer arietinum partial mRNA for cyclophilin-type peptidyl-prolyl cis-trans isomerase (ppi gene)	AJ609278	Cyclophilin-type peptidyl-prolyl cis-trans isomerase (Fragment); ( EC=5	Q708X2_CICAR	-	-	-	-	-	-	-	-	-	-	-
97	CATGGCCACTTCTTTCGCACCATTAT	FE673384.1	-	-	-	-	-	-	-	-	-	-	-	-	-	-	-	-
98	CATGGGCCGAACTGAGGAAAAGACCA	FE673383.1	8e-07	Cicer arietinum mRNA for LEA protein (clone CapLEA-1)	AJ224518	Late embryogenesis abundant protein 1; (AltName: Full=CapLEA-1)	LEA1_CICAR	-	-	-	-	-	-	-	-	-	-	-
99	CATGAGGTTACAATCATAGCTAAATC	FE673382.1	-	-	-	-	-	-	-	-	-	-	-	-	-	-	-	-
100	CATGAGCTTATGTCTTTTGCAAGCAA	FE673381.1	-	-	-	-	-	-	-	-	-	-	-	-	-	-	-	-
101	CATGGACTTTCAACCGATTCAGATGT	FE673380.1	-	-	-	-	-	-	-	-	-	-	-	-	-	-	-	-
102	CATGATGGACAAACTGCCAGATGATG	FE672909.1	-	-	-	-	-	-	-	-	-	-	-	-	-	-	-	-
103	CATGCCAATTGAAGATAGTCTAATCA	FE672908.1	-	-	-	-	-	-	-	-	-	-	-	-	-	-	-	-
104	CATGTGGCCTTGTGGTTGATATGATA	FE672907.1	8e-07	Cicer arietinum mRNA for putative Ruv DNA-helicase	AJ276264	Putative Ruv DNA-helicase	Q9M3Z6_CICAR	-	-	-	-	-	-	-	-	-	-	-
105	CATGGCCACTAACCTCAAACCCTTCT	FE672906.1	-	-	-	-	-	-	-	-	-	-	-	-	-	-	-	-
106	CATGCACATATGTCGGCGTGGATGAA	FE672903.1	-	-	-	-	-	-	-	-	-	-	-	-	-	-	-	-
107	CATGATGCAGATGCAGATCTTCGATT	FE672902.1	-	-	-	-	-	-	-	-	-	-	-	-	-	-	-	-
108	CATGTCTCCAAACCCACAGGATCTTT	FE672901.1	-	-	-	-	-	-	-	-	-	-	-	-	-	-	-	-
109	CATGCTGCAAACAAACTTGCAAGCAA	FE671661.1	-	-	-	-	-	-	-	-	-	-	-	-	-	-	-	-
110	CATGCTGTTCTCCGCTGATATTTTTC	FE671659.1	-	-	-	-	-	-	-	-	-	-	-	-	-	-	-	-
112	CATGTTCTGTAAATTTAATGAATTTC	FE671655.1	-	-	-	-	-	-	-	-	-	-	-	-	-	-	-	-
113	CATGGAAGATGTGATGATCGTAACGA	FE671654.1	-	-	-	-	-	-	-	-	-	-	-	-	-	-	-	-
114	CATGGAAAGTTAAGTCTTTTAACAAA	FE671653.1	-	-	-	-	-	-	-	-	-	-	-	-	-	-	-	-
116	CATGTGGTCGAATAGTGAACCCGATT	FE671651.1	-	-	-	-	-	-	-	-	-	-	-	-	-	-	-	-
117	CATGACCCTTCTTATTATCACGTCGA	FE671650.1	-	-	-	-	-	-	-	-	-	-	-	-	-	-	-	-
118	CATGCTGCAGCTGGTGTTGATAGATT	FE673376.1	-	-	-	-	-	-	-	-	-	-	-	-	-	-	-	-
119	CATGGGCCTGGAACTGGGAAAAATTA	FE673375.1	-	-	-	-	-	-	-	-	-	-	-	-	-	-	-	-
120	CATGGAACCGCAAACGGAGAAAAAGA	FE673373.1	-	-	-	-	-	-	-	-	-	-	-	-	-	-	-	-
121	CATGTTTTAGTTTCTCCAATGCAACA	FE673371.1	-	-	-	-	-	-	-	-	-	-	-	-	-	-	-	-
122	CATGGGCGCTTCAGGGGAAGCTAGCA	FE673370.1	-	-	-	-	-	-	-	-	-	-	-	-	-	-	-	-
123	CATGTTCCTCCATACAAGGATAATAT	FE673369.1	-	-	-	-	-	-	-	-	-	-	-	-	-	-	-	-
124	CATGGACCAAATATATTTGGAGCTTC	FE673368.1	-	-	-	-	-	-	-	-	-	-	-	-	-	-	-	-
125	CATGGGGGTCGAGATCGTCACACTTG	FE673366.1	-	-	-	-	-	-	-	-	-	-	-	-	-	-	-	-
126	CATGATAAGATTTGTTGCTCCAAAGG	FE672897.1	-	-	-	-	-	-	-	-	-	-	-	-	-	-	-	-
127	CATGAACTTGAGGTCCTATCTTGAGG	FE672894.1	-	-	-	-	-	-	-	-	-	-	-	-	-	-	-	-
128	CATGATATGATAACGGATATGAGTTC	FE672893.1	-	-	-	-	-	-	-	-	-	-	-	-	-	-	-	-
129	CATGTAAGATATTCGCAGTCTATGAT	FE672892.1	-	-	-	-	-	-	-	-	-	-	-	-	-	-	-	-
131	CATGTCTTGTCCTCAGTTTAATTACT	FE672889.1	-	-	-	-	-	-	-	-	-	-	-	-	-	-	-	-
132	CATGATGCATCTTTCACACGGTCATC	FE672888.1	-	-	-	-	-	-	-	-	-	-	-	-	-	-	-	-
133	CATGATGAGGTCCCTCGCGTTATGGA	FE672887.1	-	-	-	-	-	-	-	-	-	-	-	-	-	-	-	-
134	CATGAGCGGGTTCAAACCGGAACTTC	FE671649.1	-	-	-	-	-	-	-	-	-	-	-	-	-	-	-	-
135	CATGTTGTTGAGTCCTTTGATGTTGG	FE671648.1	-	-	-	-	-	-	-	-	-	-	-	-	-	-	-	-
136	CATGGCGGTTTCAGGTTTAAGAACTG	FE671647.1	-	-	-	-	-	-	-	-	-	-	-	-	-	-	-	-
137	CATGTTTAATTACGACAAAATGCAAA	FE671646.1	-	-	-	-	-	-	-	-	-	-	-	-	-	-	-	-
138	CATGGCTTCCCAATCAAACCCCAATT	FE671644.1	-	-	-	-	-	-	-	-	-	-	-	-	-	-	-	-
139	CATGTCAAAAAGGTTTCATCCTGGAT	FE671643.1	-	-	-	-	-	-	-	-	-	-	-	-	-	-	-	-
140	CATGTCATCACACTAGGTAGGTCTGA	FE671642.1	-	-	-	-	-	-	-	-	-	-	-	-	-	-	-	-
141	CATGGTTTTCAGATCCAGATTTCTGC	FE671641.1	-	-	-	-	-	-	-	-	-	-	-	-	-	-	-	-
142	CATGGCGCCAATCAGTCAAGGACACT	FE671640.1	-	-	-	-	-	-	-	-	-	-	-	-	-	-	-	-
144	CATGATCACAATCCACAAGCTGTTGC	FE671638.1	8e-07	Medicago sativa mRNA for cysteine protease, partial (cyp15a gene)	AJ245868	Cysteine protease (Fragment)	Q9STA4_MEDSA	-	-	-	-	-	-	-	-	-	-	-
146	CATGGAAATTGATTCCTTCTCATTCC	FE673364.1	-	-	-	-	-	-	-	-	-	-	-	-	-	-	-	-
147	CATGTTGCAGACACATAATACTATTT	FE673363.1	-	-	-	-	-	-	-	-	-	-	-	-	-	-	-	-
148	CATGTCTTCCAACAAGTTCTTCACAC	FE673362.1	-	-	-	-	-	-	-	-	-	-	-	-	-	-	-	-
149	CATGGTGGTGGTGGTGGAATGACCGG	FE673360.1	-	-	-	-	-	-	-	-	-	-	-	-	-	-	-	-
150	CATGTAGAGCTTTTCGGATGCTAACT	FE673359.1	-	-	-	-	-	-	-	-	-	-	-	-	-	-	-	-
151	CATGACGCCGCCTTCAACCCCTAAAC	FE673358.1	-	-	-	-	-	-	-	-	-	-	-	-	-	-	-	-
152	CATGAATGATCCATTTCACATACATC	FE673357.1	-	-	-	-	-	-	-	-	-	-	-	-	-	-	-	-
155	CATGGATCGGGCAATCCTTCTGCTCT	FE672885.1	-	-	-	-	-	-	-	-	-	-	-	-	-	-	-	-
156	CATGACCGAAATGTCCTCCGCGTGCT	FE672884.1	-	-	-	-	-	-	-	-	-	-	-	-	-	-	-	-
157	CATGTCAACCTTGGGTTCCCCGCCAT	FE672883.1	-	-	-	-	-	-	-	-	-	-	-	-	-	-	-	-
158	CATGTCGTCGCTTTCTACGCCCTTCC	FE672882.1	-	-	-	-	-	-	-	-	-	-	-	-	-	-	-	-
160	CATGGAATGGAAGTAGTTTCTTACAT	FE672880.1	-	-	-	-	-	-	-	-	-	-	-	-	-	-	-	-
161	CATGACGGAGTCTTAAAATGGATTTC	FE672879.1	-	-	-	-	-	-	-	-	-	-	-	-	-	-	-	-
162	CATGGCTACATCGGCAGGGTTTCCAA	FE672878.1	-	-	-	-	-	-	-	-	-	-	-	-	-	-	-	-
163	CATGGTACGTTCCATACCGTGTGAAG	FE672875.1	-	-	-	-	-	-	-	-	-	-	-	-	-	-	-	-
164	CATGTTGATGTTGATAAGTGGAACGT	FE672874.1	-	-	-	-	-	-	-	-	-	-	-	-	-	-	-	-
165	CATGAATACTAGAAATATGTGCTTCC	FE671636.1	-	-	-	-	-	-	-	-	-	-	-	-	-	-	-	-
166	CATGGTTAAGGAAACACCGTCTTATC	FE671634.1	-	-	-	-	-	-	-	-	-	-	-	-	-	-	-	-
167	CATGCGCGTCACTAATTAGATGACGA	FE671632.1	8e-07	Glycyrrhiza uralensis 26S ribosomal RNA, partial sequence	EF571299	-	-	TC115139	1e-07	0	0	Z11498	0	M.sativa 26S rRNA	-	-	-	Correlated RNA description
168	CATGGGATTCACCTAAAGAACAGATC	FE671630.1	-	-	-	-	-	-	-	-	-	-	-	-	-	-	-	-
169	CATGTATTCAGGAGCTGCATAACCAA	FE671629.1	-	-	-	-	-	-	-	-	-	-	-	-	-	-	-	-
170	CATGGTGCCTCCGGCACGTCCAGCGG	FE671628.1	-	-	-	-	-	-	-	-	-	-	-	-	-	-	-	-
171	CATGAAAGAGCAGGCCATCACAAACC	FE671627.1	-	-	-	-	-	-	-	-	-	-	-	-	-	-	-	-
172	CATGCTTTCCCAAGACAATATTGAAT	FE673351.1	-	-	-	-	-	-	-	-	-	-	-	-	-	-	-	-
173	CATGCAATGAGCAGTAGACCAAATGA	FE673350.1	-	-	-	-	-	-	-	-	-	-	-	-	-	-	-	-
174	CATGGACTTACAAAATTGTACCCATT	FE673349.1	-	-	-	-	-	-	-	-	-	-	-	-	-	-	-	-
175	CATGTGATTTACCAATCTAAGTGTTT	FE673347.1	-	-	-	-	-	-	-	-	-	-	-	-	-	-	-	-
176	CATGAGCTTTTTCATATATTGCCTCA	FE673346.1	-	-	-	-	-	-	-	-	-	-	-	-	-	-	-	-
177	CATGGTGGTGACGGGTGACGGAGAAT	FE673345.1	8e-07	Vigna radiata 18S ribosomal RNA gene, partial sequence	EU201183	-	-	AW684012	1e-07	0	0	EF571296	0	Glycyrrhiza uralensis 18S ribosomal RNA, partial sequence	-	-	-	Correlated RNA description
178	CATGTTCTTAACAAAGCTATTTTCAA	FE673344.1	-	-	-	-	-	-	-	-	-	-	-	-	-	-	-	-
179	CATGCTTCCCATATAGAAAAATTAAT	FE673343.1	-	-	-	-	-	-	-	-	-	-	-	-	-	-	-	-
180	CATGATTTCTTCCATTGCAGGAATGA	FE673342.1	-	-	-	-	-	-	-	-	-	-	-	-	-	-	-	-
181	CATGATAGGCAAACGCACTAGATCCA	FE672873.1	-	-	-	-	-	-	-	-	-	-	-	-	-	-	-	-
182	CATGGACCTTCACTGGAAGGTTCAAA	FE672872.1	-	-	-	-	-	-	-	-	-	-	-	-	-	-	-	-
183	CATGGGCCGCTGGGGATGTGGTTGAC	FE672870.1	-	-	-	-	-	-	-	-	-	-	-	-	-	-	-	-
184	CATGGGCAGAAAGTGAATTTTCACAT	FE672868.1	-	-	-	-	-	-	-	-	-	-	-	-	-	-	-	-
185	CATGTTTTCTTGTGGTGGAGCCCCGT	FE672867.1	-	-	-	-	-	-	-	-	-	-	-	-	-	-	-	-
186	CATGGTCGATAAGGCCCTACGTACAA	FE672866.1	-	-	-	-	-	-	-	-	-	-	-	-	-	-	-	-
187	CATGGAGAGGTCCGCGATAGGGATGT	FE672865.1	-	-	-	-	-	-	-	-	-	-	-	-	-	-	-	-
188	CATGACGACTCAAATGATCAAGAAGA	FE672864.1	-	-	-	-	-	-	-	-	-	-	-	-	-	-	-	-
189	CATGGTCGTGATGATTATCACTATCG	FE672862.1	-	-	-	-	-	-	-	-	-	-	-	-	-	-	-	-
190	CATGAATCTGTAAGGCTTATGCACGA	FE671624.1	-	-	-	-	-	-	-	-	-	-	-	-	-	-	-	-
191	CATGGCCTTTAACATTAAAAGGCTTC	FE671623.1	-	-	-	-	-	-	-	-	-	-	-	-	-	-	-	-
192	CATGATTGGGAGGATAAGGTGCTCTG	FE671621.1	-	-	-	-	-	TC116865	2e-06	0	0	AB012110	1e-98	Vigna radiata mRNA for ARG10, complete cds	ARG10	O64438_PHAAU	-	-
193	CATGTAGGTAGGTATTCTTTTCTCTC	FE671620.1	-	-	-	-	-	-	-	-	-	-	-	-	-	-	-	-
194	CATGGGATGTTGTGTGAATGCTCCAA	FE671617.1	-	-	-	-	-	-	-	-	-	-	-	-	-	-	-	-
195	CATGGCTCCCAAAGGTGATGTTTCAA	FE671615.1	-	-	-	-	-	-	-	-	-	-	-	-	-	-	-	-
196	CATGTTAGTTGCTGCAAGGGTATGAG	FE671614.1	-	-	-	-	-	-	-	-	-	-	-	-	-	-	-	-
197	CATGAAAGTAGGAGATCCCTGATGAC	FE673337.1	-	-	-	-	-	-	-	-	-	-	-	-	-	-	-	-
198	CATGGACATAATATTGGAACGAGAAA	FE673336.1	-	-	-	-	-	-	-	-	-	-	-	-	-	-	-	-
199	CATGAATCTTGGAGATATAGCACGTA	FE673335.1	-	-	-	-	-	-	-	-	-	-	-	-	-	-	-	-
200	CATGTTTGACAATCTTTGAAGTGTTA	FE673334.1	-	-	-	-	-	-	-	-	-	-	-	-	-	-	-	-
201	CATGTCCCCGCATATCTGTCATAACT	FE673332.1	-	-	-	-	-	-	-	-	-	-	-	-	-	-	-	-
202	CATGCTTCACCGCTTTATCTTCCTCA	FE673330.1	-	-	-	-	-	-	-	-	-	-	-	-	-	-	-	-
203	CATGAATGTTTGTTCTCTCTGTAACA	FE672861.1	-	-	-	-	-	-	-	-	-	-	-	-	-	-	-	-
204	CATGTGTCCTAAGATGAGCTCAACGA	FE672859.1	5e-05	Glycyrrhiza uralensis 26S ribosomal RNA, partial sequence	EF571299	-	-	BE204420	7e-06	0	0	Z11498	0	M.sativa 26S rRNA	-	-	-	Correlated RNA description
205	CATGCACCACCTGCTGCACCTAGTCC	FE672856.1	-	-	-	-	-	-	-	-	-	-	-	-	-	-	-	-
206	CATGAATGCCCTTTACAGTTTGCTGG	FE672855.1	-	-	-	-	-	-	-	-	-	-	-	-	-	-	-	-
207	CATGTTGTCTCTGGAGCAAGTGCAGA	FE672854.1	1e-05	Pea mRNA for the 33kDa polypeptide of the water-oxidizing complex of photosystem II	X15350	Oxygen-evolving enhancer protein 1, chloroplastic precursor; ( Short=OEE1; AltName: Full=33 kDa subunit of oxygen evolving system of photosystem II; AltName: Full=OEC 33 kDa subunit; AltName: Full=33 kDa thylakoid membrane protein)	PSBO_PEA	TC120394	7e-06	0	0	D13297	0	Pisum sativum mRNA for precursor for 33-kDa protein of photosystem II, complete cds	Oxygen-evolving enhancer protein 1, chloroplastic precursor; ( Short=OEE1; AltName: Full=33 kDa subunit of oxygen evolving system of photosystem II; AltName: Full=OEC 33 kDa subunit; AltName: Full=33 kDa thylakoid membrane protein)	PSBO_PEA	ID direct correlation	-
208	CATGGTCTGAGTGACGACTTATCTCT	FE672852.1	-	-	-	-	-	-	-	-	-	-	-	-	-	-	-	-
209	CATGGGCGTGCTGCCACAAGTTGTAC	FE671612.1	8e-07	Cicer arietinum partial mRNA for cysteine proteinase (cacG2 gene)	X93220	-	-	-	-	-	-	-	-	-	-	-	-	-
210	CATGATTCGAGACTTGAAGTCGTCAT	FE671611.1	-	-	-	-	-	-	-	-	-	-	-	-	-	-	-	-
211	CATGGACCTCTTGAGCCTGAGCAGGA	FE671609.1	-	-	-	-	-	TC114199	1e-07	0	0	AY631048	0	Glycine max triosephosphate isomerase mRNA, complete cds	Triosephosphate isomerase; ( EC=5.3.1.1)	Q6GW08_SOYBN	-	-
212	CATGCCACCACGAAGCCTCAAAACCA	FE671606.1	8e-07	Phaseolus vulgaris polyubiquitin mRNA, partial cds	U77940	Polyubiquitin (Fragment)	P93502_PHAVU	TC129190	1e-07	0	0	D26092	0	Glycine max SUBI-2 gene for ubiquitin, complete cds	Ubiquitin	Q9S7H2_SOYBN	no	Protein name correlated / partial
213	CATGCTGCTTAAATTTTCCGTGAGGC	FE671605.1	-	-	-	-	-	-	-	-	-	-	-	-	-	-	-	-
215	CATGGCAAACATTGCAAGTCTTCCAT	FE671602.1	-	-	-	-	-	-	-	-	-	-	-	-	-	-	-	-
216	CATGTCTCTCCTGTCGTATTTATGTT	FE673329.1	-	-	-	-	-	-	-	-	-	-	-	-	-	-	-	-
217	CATGTTTAGAACTCAACAAGATGAAA	FE673327.1	-	-	-	-	-	-	-	-	-	-	-	-	-	-	-	-
218	CATGTATATTTAGGTGGGTTCATCTC	FE673326.1	-	-	-	-	-	-	-	-	-	-	-	-	-	-	-	-
219	CATGGTCACGCTCCGTAAGCGAAACA	FE673325.1	-	-	-	-	-	-	-	-	-	-	-	-	-	-	-	-
220	CATGGTTTCTCCCTCACCTTTCCTGG	FE673323.1	-	-	-	-	-	-	-	-	-	-	-	-	-	-	-	-
222	CATGTCTTGGTAATCTTCAAGGTGGT	FE673321.1	-	-	-	-	-	-	-	-	-	-	-	-	-	-	-	-
223	CATGCGCCGGTGGAACTAATTAAAAA	FE673320.1	-	-	-	-	-	-	-	-	-	-	-	-	-	-	-	-
224	CATGTGGGTCCCACCTCTCTCCGCTT	FE673319.1	-	-	-	-	-	TC113301	5e-07	0	0	AB236821	0	Trifolium pratense RNA for putative tetrahydrofolate synthase, complete cds, clone: C2147	Putative tetrahydrofolate synthase	Q2PES9_TRIPR	-	-
225	CATGCTGATAATAATATAGTCATAAT	FE672848.1	-	-	-	-	-	-	-	-	-	-	-	-	-	-	-	-
226	CATGTTGATCCTGCCACAAGCTCCAC	FE672846.1	-	-	-	-	-	-	-	-	-	-	-	-	-	-	-	-
227	CATGCTGTTATTTATGGGGAAAGCAC	FE672842.1	-	-	-	-	-	-	-	-	-	-	-	-	-	-	-	-
228	CATGATACTTCGCAGGAGCCTTTGCC	FE672839.1	-	-	-	-	-	-	-	-	-	-	-	-	-	-	-	-
229	CATGTGATTGACGCACAAATAACGAC	FE672838.1	-	-	-	-	-	-	-	-	-	-	-	-	-	-	-	-
230	CATGCTCGCTCAAAGCGGTAACAACA	FE671601.1	-	-	-	-	-	-	-	-	-	-	-	-	-	-	-	-
231	CATGGCATAAACGTGAGGACTATCGA	FE671600.1	-	-	-	-	-	-	-	-	-	-	-	-	-	-	-	-
232	CATGAGCCCGAAAAGGGCTGTTTGTT	FE671599.1	-	-	-	-	-	-	-	-	-	-	-	-	-	-	-	-
233	CATGGACCCTTCAATACTTCTAACAG	FE671597.1	-	-	-	-	-	-	-	-	-	-	-	-	-	-	-	-
234	CATGATAGCGTTGATACCAGTGAATT	FE671596.1	-	-	-	-	-	-	-	-	-	-	-	-	-	-	-	-
235	CATGACACAGAACGCTCCACGTAAAA	FE671595.1	-	-	-	-	-	-	-	-	-	-	-	-	-	-	-	-
237	CATGGGCCATTCAACTATGGAAACGG	FE671593.1	-	-	-	-	-	-	-	-	-	-	-	-	-	-	-	-
238	CATGGTTGATCCTCTCCTCTTTCTTC	FE671592.1	-	-	-	-	-	-	-	-	-	-	-	-	-	-	-	-
239	CATGATTTCATCTTTTTTTCTTAAAT	FE673317.1	-	-	-	-	-	-	-	-	-	-	-	-	-	-	-	-
240	CATGTCCCTCAAAAACTCCAAACACC	FE673314.1	-	-	-	-	-	-	-	-	-	-	-	-	-	-	-	-
241	CATGTAAAAGAGTTCAACTTTAGAGT	FE673313.1	-	-	-	-	-	-	-	-	-	-	-	-	-	-	-	-
242	CATGCAGGATGATAGCGCCTATTCTC	FE673312.1	-	-	-	-	-	TC114914	7e-06	0	0	X76269	2e-153	P.sativum mRNA for thioredoxin M	Thioredoxin M-type, chloroplastic precursor; ( Short=Trx-M)	TRXM_PEA	-	-
243	CATGGCCATTGAAGTTTTGCTTGGTG	FE673311.1	-	-	-	-	-	-	-	-	-	-	-	-	-	-	-	-
244	CATGGCTAACACCCCAAGCACTCTTG	FE673310.1	-	-	-	-	-	-	-	-	-	-	-	-	-	-	-	-
245	CATGTCTTTGGCCGAACAAGGTGCAG	FE673309.1	-	-	-	-	-	-	-	-	-	-	-	-	-	-	-	-
246	CATGACCGCTGGGAAATTGAAATGTA	FE673308.1	-	-	-	-	-	-	-	-	-	-	-	-	-	-	-	-
247	CATGGGATTCTTGTTCAGCTACCTTT	FE673306.1	-	-	-	-	-	-	-	-	-	-	-	-	-	-	-	-
248	CATGTCTGGTCCCACAGACACTCTCC	FE672837.1	-	-	-	-	-	-	-	-	-	-	-	-	-	-	-	-
249	CATGTACTAGATCCAGCGAAACCACG	FE672836.1	-	-	-	-	-	-	-	-	-	-	-	-	-	-	-	-
250	CATGGGTCGTATGCACAGTCGCGGTA	FE672833.1	-	-	-	-	-	-	-	-	-	-	-	-	-	-	-	-
251	CATGGCTTCACCTGGTTCAGCCCAAA	FE672831.1	-	-	-	-	-	-	-	-	-	-	-	-	-	-	-	-
252	CATGATTTTCAAACAAGTCGGGGGAA	FE672830.1	-	-	-	-	-	-	-	-	-	-	-	-	-	-	-	-
253	CATGCGGCACTACCAAGTTGCTTCTG	FE672829.1	-	-	-	-	-	-	-	-	-	-	-	-	-	-	-	-
254	CATGGAGAGAAGAAAGGGATTATGGA	FE671589.1	8e-07	Pisum sativum dehydrin 3 (Dhn3) mRNA, complete cds	U91970	Dehydrin 3	O04118_PEA	-	-	-	-	-	-	-	-	-	-	-
255	CATGGCGGTGCTGTTTTTGGCGGCGA	FE671588.1	-	-	-	-	-	TC122258	1e-07	0	0	AC187645	3e-10	Glycine max clone gmp1-49d18, complete sequence	-	-	-	-
256	CATGTTATTTGGTACCTAAAAAAATA	FE671587.1	-	-	-	-	-	-	-	-	-	-	-	-	-	-	-	-
257	CATGGGATTGTTGCAAAGAAGCCCAT	FE671586.1	-	-	-	-	-	-	-	-	-	-	-	-	-	-	-	-
258	CATGCTCAAAACGCTTGTGGTGTTTC	FE671585.1	-	-	-	-	-	-	-	-	-	-	-	-	-	-	-	-
259	CATGTCCCTTATGATTCATAGCTGAA	FE671584.1	-	-	-	-	-	-	-	-	-	-	-	-	-	-	-	-
260	CATGAACACAAATTCAAGTTGTTTTG	FE671582.1	-	-	-	-	-	-	-	-	-	-	-	-	-	-	-	-
261	CATGCGCCGTTACTTTGAAACAGTTG	FE671581.1	-	-	-	-	-	-	-	-	-	-	-	-	-	-	-	-
262	CATGGTATTTTTCAGCGAAACAGTAA	FE671580.1	-	-	-	-	-	-	-	-	-	-	-	-	-	-	-	-
263	CATGATTTTTCAGAGAGAGAGAGAGA	FE671579.1	-	-	-	-	-	-	-	-	-	-	-	-	-	-	-	-
264	CATGTGTCATTGACTTTAAATATATT	FE672441.1	-	-	-	-	-	-	-	-	-	-	-	-	-	-	-	-
265	CATGCTTCGGATTTTTGGGAGAGATA	FE672437.1	-	-	-	-	-	-	-	-	-	-	-	-	-	-	-	-
266	CATGCTTTCTTTGTTATGAATAATCT	FE672435.1	-	-	-	-	-	-	-	-	-	-	-	-	-	-	-	-
267	CATGATCCCGAACCTGGATCTGTCAC	FE672434.1	-	-	-	-	-	-	-	-	-	-	-	-	-	-	-	-
268	CATGGAAGAGATACAATTTGAGCTTA	FE672433.1	8e-07	Glycine max enzymatic resistance protein mRNA, complete cds	DQ167250	Enzymatic resistance protein	Q3S4G9_SOYBN	-	-	-	-	-	-	-	-	-	-	-
269	CATGAATCATCAAAGCAACAGGCAGA	FE672432.1	8e-07	Spartium junceum isolate HPSUMS 280 18S ribosomal RNA gene, partial sequence	EU605787	-	-	AW684012	1e-07	0	0	EF571296	0	Glycyrrhiza uralensis 18S ribosomal RNA, partial sequence	-	-	-	Correlated RNA description
270	CATGATGCACAACAGGACTTACTGTG	FE672431.1	-	-	-	-	-	-	-	-	-	-	-	-	-	-	-	-
271	CATGTCTAGTGTCTCTAGTACCTATT	FE672430.1	-	-	-	-	-	-	-	-	-	-	-	-	-	-	-	-
273	CATGGTTTCGTTGCCAAGCCTGAGAC	FE672428.1	-	-	-	-	-	-	-	-	-	-	-	-	-	-	-	-
274	CATGGAAGGTTATCCTAGTGATGAGG	FE672426.1	-	-	-	-	-	-	-	-	-	-	-	-	-	-	-	-
275	CATGGGAAGTTGTGCTAACGGAGGAG	FE672424.1	5e-05	Lupinus luteus NADH-ubiquinone oxidoreductase subunit PSST (PSST) gene, PSST-3 allele, complete cds; nuclear gene for mitochondrial product	AF279902	NADH-ubiquinone oxidoreductase subunit PSST	Q9LKH4_LUPLU	-	-	-	-	-	-	-	-	-	-	-
277	CATGAGTCGATTTGTAACTTCAGACC	FE672420.1	-	-	-	-	-	-	-	-	-	-	-	-	-	-	-	-
278	CATGGATGTTAGGATCTGACAAACTC	FE672419.1	-	-	-	-	-	-	-	-	-	-	-	-	-	-	-	-
279	CATGAAAATAGTGTTTCAACTGGATA	FE672418.1	-	-	-	-	-	-	-	-	-	-	-	-	-	-	-	-
280	CATGATGTGAAATTGGGTGACTCAGC	FE672417.1	-	-	-	-	-	-	-	-	-	-	-	-	-	-	-	-
281	CATGGAAAACATTATAATCTAGTTTC	FE672415.1	-	-	-	-	-	-	-	-	-	-	-	-	-	-	-	-
282	CATGGATTCACACCCTTCTCCACGCA	FE672414.1	-	-	-	-	-	TC131004	7e-06	0	0	AF369887	0	Pisum sativum ribulose-5-phosphate-3-epimerase mRNA, complete cds	Ribulose-5-phosphate-3-epimerase	Q8S4X2_PEA	-	-
283	CATGTCGAAACAAGATTTCAAATCCA	FE672413.1	-	-	-	-	-	-	-	-	-	-	-	-	-	-	-	-
284	CATGGGTACGCCAAGCATATTTATGG	FE672412.1	-	-	-	-	-	-	-	-	-	-	-	-	-	-	-	-
285	CATGAAGGAGTCAAAGGACAAATTGT	FE672411.1	-	-	-	-	-	-	-	-	-	-	-	-	-	-	-	-
286	CATGCCTCTAGCATCTTATCATTTCT	FE672410.1	-	-	-	-	-	-	-	-	-	-	-	-	-	-	-	-
287	CATGCATTCCGTCTACTGAAGCACTA	FE672409.1	-	-	-	-	-	-	-	-	-	-	-	-	-	-	-	-
288	CATGGAAGTCGAAATCCGCTAAGGAG	FE672408.1	8e-07	Robinia pseudoacacia 26S ribosomal RNA gene, partial sequence	EU340885	-	-	AW692464	1e-07	0	0	EF571299	0	Glycyrrhiza uralensis 26S ribosomal RNA, partial sequence	-	-	-	Correlated RNA description
289	CATGCAATGCTGCACTGCTTGAGACT	FE672407.1	-	-	-	-	-	-	-	-	-	-	-	-	-	-	-	-
290	CATGTGTAAGCAAATATAGCTAATAT	FE672406.1	8e-07	C.arietinum mRNA for metallothionein (clone: CanMT-1)	X95708	Metallothionein-like protein 1; ( Short=MT-1)	MT1_CICAR	-	-	-	-	-	-	-	-	-	-	-
291	CATGCTATCCTCCAAAAGCCGCATAA	FE672405.1	-	-	-	-	-	-	-	-	-	-	-	-	-	-	-	-
292	CATGTTTCGCCCTGAAAGAATTAAAG	FE672404.1	8e-07	Cicer arietinum partial mRNA for epoxide hydrolase, clone CanEPH	AJ487037	Epoxide hydrolase (Fragment); ( EC=3	Q8LPE6_CICAR	-	-	-	-	-	-	-	-	-	-	-
293	CATGAAAGGAGAAAGAGATGGGGAGG	FE672403.1	-	-	-	-	-	-	-	-	-	-	-	-	-	-	-	-
294	CATGGCTGCAGCAAGCGTTCGAGTAT	FE672402.1	-	-	-	-	-	-	-	-	-	-	-	-	-	-	-	-
295	CATGAATGGATTAACGAGATTCCCAC	FE672401.1	8e-07	Glycyrrhiza uralensis 26S ribosomal RNA, partial sequence	EF571299	-	-	TC115139	1e-07	0	0	Z11498	0	M.sativa 26S rRNA	-	-	-	Correlated RNA description
296	CATGAGCAGGTTGAAGAGAGCTCTAA	FE672399.1	-	-	-	-	-	TC124761	1e-07	0	0	DQ219393	4e-35	Leucaena leucocephala clone A516 mitochondrial sequence	-	-	-	-
297	CATGTGAAGTATTGCAACTGCAGCAC	FE672398.1	-	-	-	-	-	-	-	-	-	-	-	-	-	-	-	-
298	CATGGCACCCTCTTCACCATCTTCCT	FE672397.1	-	-	-	-	-	-	-	-	-	-	-	-	-	-	-	-
299	CATGTATGAGATAAGAGCAGGTATTC	FE672396.1	-	-	-	-	-	-	-	-	-	-	-	-	-	-	-	-
300	CATGGCCTTTTTGCAAAAGTTTGCTG	FE672395.1	-	-	-	-	-	-	-	-	-	-	-	-	-	-	-	-
301	CATGTATGAATTTTAGTAATGGACTT	FE672393.1	-	-	-	-	-	-	-	-	-	-	-	-	-	-	-	-
302	CATGGGTGAGGAGCAGATTTGTGGCC	FE672391.1	-	-	-	-	-	TC115022	5e-07	0	0	AF416338	4e-77	Medicago sativa eukaryotic translation initiation factor 5A-2 mRNA, complete cds	Eukaryotic translation initiation factor 5A-2; ( Short=eIF-5A-2)	IF5A2_MEDSA	-	-
303	CATGGTGACCGGTTNAACCGGGATTT	FE672390.1	-	-	-	-	-	-	-	-	-	-	-	-	-	-	-	-
304	CATGTTTCAGAAGCTTCACAAATAAT	FE672387.1	8e-07	Cicer arietinum partial mRNA for hypothetical protein	AJ271665	Putative uncharacterized protein (Fragment)	Q9M445_CICAR	-	-	-	-	-	-	-	-	-	-	-
305	CATGAGCACCAATTGTCTTAGTGGCT	FE672386.1	-	-	-	-	-	-	-	-	-	-	-	-	-	-	-	-
306	CATGATGCCCAAAAATCTACCAGCAC	FE672385.1	-	-	-	-	-	-	-	-	-	-	-	-	-	-	-	-
308	CATGGGGCGTATCCTCCACCGGCGGC	FE672383.1	-	-	-	-	-	-	-	-	-	-	-	-	-	-	-	-
309	CATGTCAATATCATACCGAGTTGTCC	FE672381.1	-	-	-	-	-	-	-	-	-	-	-	-	-	-	-	-
310	CATGTTCTGATTTATGCTTTGCAGCC	FE672380.1	-	-	-	-	-	-	-	-	-	-	-	-	-	-	-	-
311	CATGAAATCTTCTTCCTTCTCCTTGT	FE672379.1	-	-	-	-	-	-	-	-	-	-	-	-	-	-	-	-
312	CATGATCAAGGTTCTGAAACATATGT	FE672378.1	-	-	-	-	-	-	-	-	-	-	-	-	-	-	-	-
313	CATGGAATTGCAACATTGAAAGGTCT	FE672377.1	-	-	-	-	-	-	-	-	-	-	-	-	-	-	-	-
314	CATGAAGATAATGAGGCGCAGCTTCT	FE672376.1	-	-	-	-	-	-	-	-	-	-	-	-	-	-	-	-
315	CATGGCCCTATCCTCTTGTACTAGAC	FE672375.1	8e-07	Cicer arietinum mRNA for lipid transfer protein	AJ002958	Non-specific lipid-transfer protein precursor; ( Short=LTP)	NLTP_CICAR	-	-	-	-	-	-	-	-	-	-	-
316	CATGAAGATGGGTGTGGAAGTCTATC	FE672374.1	-	-	-	-	-	TC124067	1e-07	0	0	AY496909	0	Glycine max enolase mRNA, complete cds	Enolase; ( EC=4.2.1.11)	Q6RIB7_SOYBN	-	-
317	CATGGCCATCAGTGTGAATTATCAGC	FE672373.1	-	-	-	-	-	-	-	-	-	-	-	-	-	-	-	-
318	CATGTGGATTACTTTATTGCGGTTTA	FE672372.1	-	-	-	-	-	-	-	-	-	-	-	-	-	-	-	-
319	CATGGCGCCCAATCAGTCAGGACACT	FE672370.1	-	-	-	-	-	-	-	-	-	-	-	-	-	-	-	-
320	CATGGTTTTCTTCTGGGGACGAGGCA	FE672367.1	-	-	-	-	-	-	-	-	-	-	-	-	-	-	-	-
322	CATGCCTTGATCTTTCATCTAATCTT	FE672365.1	-	-	-	-	-	-	-	-	-	-	-	-	-	-	-	-
324	CATGACACCTTCTCTCCCCCCACACC	FE672362.1	-	-	-	-	-	-	-	-	-	-	-	-	-	-	-	-
325	CATGAATACAAGCCAGAGTTCGACAT	FE672361.1	3e-06	Cicer arietinum mRNA for glyceraldehyde 3-phosphate dehydrogenase, partial	AJ010224	Glyceraldehyde 3-phosphate dehydrogenase, cytosolic (Fragment); ( EC=1	O81924_CICAR	-	-	-	-	-	-	-	-	-	-	-
326	CATGGCTGTCTCCAGTTCATCTCTTG	FE672360.1	-	-	-	-	-	-	-	-	-	-	-	-	-	-	-	-
327	CATGAAGGTTATGTGAATTGTGGTTA	FE672359.1	-	-	-	-	-	-	-	-	-	-	-	-	-	-	-	-
328	CATGGTGTGGTTTAGATGGCTATGAT	FE672357.1	-	-	-	-	-	-	-	-	-	-	-	-	-	-	-	-
329	CATGAAACAGATTCAGGAAGCTTTGT	FE672356.1	-	-	-	-	-	-	-	-	-	-	-	-	-	-	-	-
330	CATGTTCCCGCATAACTGTCATAACT	FE672355.1	-	-	-	-	-	-	-	-	-	-	-	-	-	-	-	-
331	CATGTCGCTGATGGATTTGTTGGAGG	FE672354.1	-	-	-	-	-	-	-	-	-	-	-	-	-	-	-	-
332	CATGGGTTTTGAACCTCAAATTAGGA	FE672353.1	8e-07	Pisum sativum P72 DEAD box protein mRNA, complete cds	AF188678	P72 DEAD box protein	Q9SP26_PEA	TC130706	1e-07	0	0	AF188678	0	Pisum sativum P72 DEAD box protein mRNA, complete cds	P72 DEAD box protein	Q9SP26_PEA	ID direct correlation	-
333	CATGCCCCGGTGGAACTAATTATAGA	FE672352.1	8e-07	Cicer arietinum L. mRNA for thaumatin-like protein PR-5a	AJ010502	Thaumatin-like protein PR-5a precursor	O81927_CICAR	-	-	-	-	-	-	-	-	-	-	-
334	CATGAAGGTGAAGGGTAATGTTTTCA	FE672350.1	-	-	-	-	-	-	-	-	-	-	-	-	-	-	-	-
335	CATGAGATTTAAAAGCAAATTATAGC	FE672349.1	-	-	-	-	-	-	-	-	-	-	-	-	-	-	-	-
336	CATGCTTTTTACTAAGTTTGTTCTGT	FE672348.1	-	-	-	-	-	-	-	-	-	-	-	-	-	-	-	-
337	CATGAATCGCCTGCGGAGAAGAGGGC	FE672346.1	-	-	-	-	-	-	-	-	-	-	-	-	-	-	-	-
338	CATGATTGACCAGGGTGAGAAGGATG	FE672057.1	-	-	-	-	-	AJ388813	5e-07	0	0	AY635929	1e-39	Arachis hypogaea putative inorganic pyrophosphatase mRNA, complete cds	Putative inorganic pyrophosphatase	Q6KBB0_ARAHY	-	-
339	CATGTAATATTGTTCTGTTAGTTAAC	FE672054.1	-	-	-	-	-	-	-	-	-	-	-	-	-	-	-	-
341	CATGTGCACTGAACACAGAATTCCAA	FE672052.1	-	-	-	-	-	-	-	-	-	-	-	-	-	-	-	-
342	CATGTCAGCATTGATGTTGTATCTAC	FE672051.1	-	-	-	-	-	-	-	-	-	-	-	-	-	-	-	-
344	CATGATGCACAACAGGACATACTGTG	FE672047.1	3e-06	Medicago sativa clone C3 ribosomal protein L32 mRNA, complete cds	DQ122831	Ribosomal protein L32	Q45NI6_MEDSA	BQ144097	5e-07	0	0	DQ122831	0	Medicago sativa clone C3 ribosomal protein L32 mRNA, complete cds	Ribosomal protein L32	Q45NI6_MEDSA	ID direct correlation	-
345	CATGGTTGTCTCAGTTACCGCATCAA	FE672046.1	-	-	-	-	-	-	-	-	-	-	-	-	-	-	-	-
346	CATGGTCTCTGCTACGTTGTCGGTGA	FE671289.1	-	-	-	-	-	-	-	-	-	-	-	-	-	-	-	-
347	CATGTCTTGGTTATCTTCAAGGTGGT	FE671287.1	8e-07	Cicer arietinum mRNA for lipid transfer protein	AJ002958	Non-specific lipid-transfer protein precursor; ( Short=LTP)	NLTP_CICAR	-	-	-	-	-	-	-	-	-	-	-
348	CATGGTCCTATTCATTTCCGTGCTCC	FE671285.1	8e-07	Lupinus luteus clone L13A3I ribosomal protein L13A gene, partial cds	EF584661	Ribosomal protein L13A (Fragment)	A5JVN9_LUPLU	-	-	-	-	-	-	-	-	-	-	-
349	CATGGGTCGCTCTAATGTCGGGAATT	FE671284.1	-	-	-	-	-	-	-	-	-	-	-	-	-	-	-	-
350	CATGCTCAAAACGCTTGTGGTGTATC	FE671283.1	-	-	-	-	-	-	-	-	-	-	-	-	-	-	-	-
351	CATGCAATGATGCTGGAAACAATTGC	FE671282.1	-	-	-	-	-	TC126702	1e-07	0	0	U87907	4e-173	Glycine max alternative oxidase 2b (Aox2b) mRNA, complete cds; nuclear gene for mitochondrial product	Alternative oxidase 3, mitochondrial precursor; ( EC=1.-.-.-)	AOX3_SOYBN	-	-
352	CATGCTGAAAACAATATCTTCAGCTA	FE671281.1	-	-	-	-	-	-	-	-	-	-	-	-	-	-	-	-
353	CATGGAGCACCCTCACAATGCAGTTC	FE672045.1	-	-	-	-	-	-	-	-	-	-	-	-	-	-	-	-
354	CATGGACATCAGTGAAGATGAAGATG	FE672044.1	-	-	-	-	-	-	-	-	-	-	-	-	-	-	-	-
355	CATGGGGCTTGTTTCGCCGAACAACA	FE672043.1	-	-	-	-	-	-	-	-	-	-	-	-	-	-	-	-
356	CATGTTTTTCACCAACAGGATGTGGA	FE672042.1	-	-	-	-	-	-	-	-	-	-	-	-	-	-	-	-
357	CATGATGATTTTCTCATTTCTGCTAT	FE672041.1	-	-	-	-	-	-	-	-	-	-	-	-	-	-	-	-
358	CATGAATCTACAAAGAACTCTACGCG	FE672040.1	-	-	-	-	-	-	-	-	-	-	-	-	-	-	-	-
359	CATGCATCATCTTTCCCAACAACCGT	FE672039.1	-	-	-	-	-	-	-	-	-	-	-	-	-	-	-	-
360	CATGATTCTCCGTCCGCGGCGACATA	FE672038.1	-	-	-	-	-	-	-	-	-	-	-	-	-	-	-	-
362	CATGAATAGAGTTGATGAATATATTG	FE672035.1	-	-	-	-	-	-	-	-	-	-	-	-	-	-	-	-
363	CATGGCTGGCATTTGTTGTTTTCATC	FE672034.1	-	-	-	-	-	-	-	-	-	-	-	-	-	-	-	-
364	CATGGAAGGGCTAAACAAGCAGCAGC	FE671276.1	-	-	-	-	-	-	-	-	-	-	-	-	-	-	-	-
365	CATGCTTGCGGCAGCTCACGCATTAT	FE671275.1	-	-	-	-	-	-	-	-	-	-	-	-	-	-	-	-
366	CATGCTCGTTTTGTTGATTTTTTTTT	FE671274.1	-	-	-	-	-	-	-	-	-	-	-	-	-	-	-	-
367	CATGATAAACTAAACAATCTTCAATT	FE671273.1	-	-	-	-	-	-	-	-	-	-	-	-	-	-	-	-
368	CATGTAGTCTTGGTCTTCAACAGAAA	FE671272.1	-	-	-	-	-	-	-	-	-	-	-	-	-	-	-	-
370	CATGGCCCTATCCTCTTGTACTAAAC	FE671270.1	5e-05	Cicer arietinum mRNA for lipid transfer protein	AJ002958	Non-specific lipid-transfer protein precursor; ( Short=LTP)	NLTP_CICAR	-	-	-	-	-	-	-	-	-	-	-
371	CATGGAATATGAAATTTACAAGGCGA	FE671268.1	-	-	-	-	-	-	-	-	-	-	-	-	-	-	-	-
372	CATGTTCACTTGCCATCTTCATCCCA	FE671267.1	-	-	-	-	-	-	-	-	-	-	-	-	-	-	-	-
373	CATGTGTATCTCACACTTGTCCATTG	FE672033.1	-	-	-	-	-	-	-	-	-	-	-	-	-	-	-	-
374	CATGACAATGCTTACAGTGCTTATCC	FE672032.1	-	-	-	-	-	-	-	-	-	-	-	-	-	-	-	-
375	CATGATATCAAATTGCCTCCAACAAG	FE672031.1	-	-	-	-	-	-	-	-	-	-	-	-	-	-	-	-
376	CATGATGAATAGACTTAGCCATTCCA	FE672029.1	-	-	-	-	-	-	-	-	-	-	-	-	-	-	-	-
377	CATGCGTCTCGTTCTTAAGAGCCGGC	FE672027.1	-	-	-	-	-	-	-	-	-	-	-	-	-	-	-	-
378	CATGTCTAGCTTTCAATCAACCACAA	FE672026.1	-	-	-	-	-	-	-	-	-	-	-	-	-	-	-	-
379	CATGCAAAACTTAGCAAGGGCTATTC	FE672025.1	-	-	-	-	-	-	-	-	-	-	-	-	-	-	-	-
381	CATGGTGGTGCTGGTCACTTGATGGC	FE672023.1	-	-	-	-	-	-	-	-	-	-	-	-	-	-	-	-
382	CATGTTTGAGCAAGACACGGTTTTAA	FE672022.1	-	-	-	-	-	-	-	-	-	-	-	-	-	-	-	-
384	CATGTTTCATTGCTTCTTCATAATCA	FE671263.1	-	-	-	-	-	-	-	-	-	-	-	-	-	-	-	-
385	CATGAAGGATGAAGGTGTTATTGCTC	FE671261.1	-	-	-	-	-	-	-	-	-	-	-	-	-	-	-	-
386	CATGTACAGAACTTACAAATAAAGCT	FE671259.1	-	-	-	-	-	-	-	-	-	-	-	-	-	-	-	-
387	CATGGAGGATGAACGTGATGCCGAGT	FE671258.1	-	-	-	-	-	-	-	-	-	-	-	-	-	-	-	-
388	CATGGTATGTACAGGAAGTGGAAGTG	FE671257.1	-	-	-	-	-	-	-	-	-	-	-	-	-	-	-	-
389	CATGCGCGTTTGCCGTGAATTCGCCG	FE671255.1	-	-	-	-	-	-	-	-	-	-	-	-	-	-	-	-
390	CATGCCCTGATGCTTATCATCAACCT	FE671254.1	8e-07	Cicer arietinum L. mRNA for thaumatin-like protein PR-5a	AJ010502	Thaumatin-like protein PR-5a precursor	O81927_CICAR	ES613827	7e-06	0	0	AJ010502	1e-67	Cicer arietinum L. mRNA for thaumatin-like protein PR-5a	Thaumatin-like protein PR-5a precursor	O81927_CICAR	ID direct correlation	-
391	CATGGTTGGCTGTGGCACTCTTTCTC	FE672021.1	-	-	-	-	-	-	-	-	-	-	-	-	-	-	-	-
392	CATGGAAATCACCCATTCACTTGTTT	FE672018.1	-	-	-	-	-	-	-	-	-	-	-	-	-	-	-	-
393	CATGGCTCTTCAATAAAACCAGGTCA	FE672017.1	-	-	-	-	-	-	-	-	-	-	-	-	-	-	-	-
394	CATGTTCAAAAGCAGATGAGGAACCA	FE672016.1	-	-	-	-	-	-	-	-	-	-	-	-	-	-	-	-
395	CATGGTTTAAAGCAAAGATTTTTCTC	FE672015.1	-	-	-	-	-	-	-	-	-	-	-	-	-	-	-	-
396	CATGGGTAAGAGGCTGGGACGATAAC	FE672014.1	-	-	-	-	-	-	-	-	-	-	-	-	-	-	-	-
397	CATGAAAACTGCCATTTCTTCCATCA	FE672012.1	-	-	-	-	-	-	-	-	-	-	-	-	-	-	-	-
398	CATGGGCATNCCCTCATCGTTAATAG	FE672011.1	-	-	-	-	-	-	-	-	-	-	-	-	-	-	-	-
400	CATGTTCCGTTNACTTCAAGCTTTTC	FE671250.1	-	-	-	-	-	-	-	-	-	-	-	-	-	-	-	-
401	CATGTCTTTGCTTTTAGATCTCATCA	FE671249.1	-	-	-	-	-	-	-	-	-	-	-	-	-	-	-	-
402	CATGCTGAATAAATGTTGTGGTGTTC	FE671248.1	-	-	-	-	-	-	-	-	-	-	-	-	-	-	-	-
403	CATGCTGGATGTGTTGCGAAGATCAA	FE671247.1	-	-	-	-	-	-	-	-	-	-	-	-	-	-	-	-
404	CATGTCCAAATAAGAAGGGGCTGGTG	FE671245.1	-	-	-	-	-	-	-	-	-	-	-	-	-	-	-	-
405	CATGCCGATGAGTACTCAAAACTAGT	FE671243.1	-	-	-	-	-	-	-	-	-	-	-	-	-	-	-	-
406	CATGTTTGTATGTTATATATATTCAC	FE671242.1	-	-	-	-	-	-	-	-	-	-	-	-	-	-	-	-
407	CATGGGATTTGTTGAAGGCTACAGGG	FE672008.1	1e-05	Pisum sativum light-harvesting chlorophyll-a/b binding protein Lhcb2 mRNA, complete cds	AY845254	Chlorophyll a-b binding protein 215, chloroplastic precursor; (AltName: Full=LHCII type II CAB-215; Short=LHCP)	CB215_PEA	TC121008	2e-06	0	0	AY845254	0	Pisum sativum light-harvesting chlorophyll-a/b binding protein Lhcb2 mRNA, complete cds	Chlorophyll a-b binding protein 215, chloroplastic precursor; (AltName: Full=LHCII type II CAB-215; Short=LHCP)	CB215_PEA	ID direct correlation	-
408	CATGGAACTTCAAAGCAAGATCTTGT	FE672007.1	-	-	-	-	-	-	-	-	-	-	-	-	-	-	-	-
410	CATGCATCCATCTGAGTTTCTTGAGC	FE672004.1	-	-	-	-	-	-	-	-	-	-	-	-	-	-	-	-
411	CATGATTTACAGGGTTCGAATTCGAG	FE672003.1	-	-	-	-	-	-	-	-	-	-	-	-	-	-	-	-
412	CATGGAGATGAAATATGCCAAGTGAA	FE672002.1	-	-	-	-	-	-	-	-	-	-	-	-	-	-	-	-
414	CATGGTCTAATTCTATGGAATCAGAC	FE672000.1	-	-	-	-	-	EY474709	7e-06	0	0	AF532620	6e-110	Glycine max hypothetical protein mRNA, complete cds	Putative uncharacterized protein	Q8LJS0_SOYBN	-	-
415	CATGCTGGTGGTAAATGCCCTGAAGA	FE671998.1	-	-	-	-	-	-	-	-	-	-	-	-	-	-	-	-
417	CATGACTGAAGCTTTGGAGCAGACTT	FE671240.1	1e-05	Glycine max Cu/Zn-superoxide dismutase copper chaperone precursor (CCS) mRNA, complete cds; nuclear gene for chloroplast product	AF329816	Cu/Zn-superoxide dismutase copper chaperone precursor	Q9BBU5_SOYBN	TC118831	5e-07	0	0	AF329816	0	Glycine max Cu/Zn-superoxide dismutase copper chaperone precursor (CCS) mRNA, complete cds; nuclear gene for chloroplast product	Cu/Zn-superoxide dismutase copper chaperone precursor	Q9BBU5_SOYBN	ID direct correlation	-
418	CATGCAACGCCCCAGCTAAAATCTCA	FE671238.1	-	-	-	-	-	-	-	-	-	-	-	-	-	-	-	-
419	CATGGTTTAAGGGAAGCTTTCCATCA	FE671237.1	-	-	-	-	-	-	-	-	-	-	-	-	-	-	-	-
420	CATGCAAAAAACTGGCAATTGTGTAC	FE671236.1	-	-	-	-	-	-	-	-	-	-	-	-	-	-	-	-
422	CATGCAGAAGCAATCAATTACAGTTA	FE671233.1	-	-	-	-	-	-	-	-	-	-	-	-	-	-	-	-
424	CATGAGAATCGGTCGCCTTCGGCGTT	FE671231.1	-	-	-	-	-	-	-	-	-	-	-	-	-	-	-	-
425	CATGCCTTCTAGGGGAAACAGAGTAG	FE671230.1	-	-	-	-	-	-	-	-	-	-	-	-	-	-	-	-
426	CATGAGTGTTAGTATGTATCAAGGAG	FE671997.1	-	-	-	-	-	-	-	-	-	-	-	-	-	-	-	-
427	CATGTGTGTGTTGCTTAATGGGCCAA	FE671996.1	8e-07	Cicer arietinum mRNA for putative transmembrane channel protein, partial	AJ005869	Transmembrane channel protein (Fragment)	O65741_CICAR	-	-	-	-	-	-	-	-	-	-	-
428	CATGATTTAAATAGGAACAGGTTCTC	FE671995.1	-	-	-	-	-	-	-	-	-	-	-	-	-	-	-	-
429	CATGGCTGCAGTCATTGTCTTATCTT	FE671994.1	-	-	-	-	-	-	-	-	-	-	-	-	-	-	-	-
430	CATGGCCAGAGAGGACTCAGAAAATT	FE671993.1	-	-	-	-	-	-	-	-	-	-	-	-	-	-	-	-
431	CATGTCTCTAATGGCATATGTACTTA	FE671992.1	-	-	-	-	-	-	-	-	-	-	-	-	-	-	-	-
432	CATGCACAATTATCTCAGCAGGAACA	FE671991.1	-	-	-	-	-	-	-	-	-	-	-	-	-	-	-	-
433	CATGGGCTGATTTGGGGTTTTAGAGC	FE671990.1	8e-07	Cicer arietinum mRNA for ubiquitin conjugating enzyme	AJ005348	Ubiquitin conjugating enzyme (Fragment)	O65733_CICAR	-	-	-	-	-	-	-	-	-	-	-
434	CATGATTCAAAAACCCATCCTGATTT	FE671987.1	-	-	-	-	-	-	-	-	-	-	-	-	-	-	-	-
435	CATGCTCTCGGTAACATAACTTCTGA	FE671228.1	-	-	-	-	-	-	-	-	-	-	-	-	-	-	-	-
436	CATGAATCAGCAAGTTCAATAAGTTG	FE671227.1	-	-	-	-	-	-	-	-	-	-	-	-	-	-	-	-
437	CATGATGAGGATGAAGAGGAGGAGGA	FE671226.1	-	-	-	-	-	-	-	-	-	-	-	-	-	-	-	-
438	CATGATGAGGTCCAGCGCGTTATGGA	FE671225.1	-	-	-	-	-	-	-	-	-	-	-	-	-	-	-	-
439	CATGTATAAACTGCACATAATTTAGA	FE671224.1	-	-	-	-	-	-	-	-	-	-	-	-	-	-	-	-
440	CATGCAACAACACCGCAGACGGACGA	FE671223.1	-	-	-	-	-	-	-	-	-	-	-	-	-	-	-	-
441	CATGCAATAAGTTCATTTGTGTCATT	FE671222.1	-	-	-	-	-	-	-	-	-	-	-	-	-	-	-	-
442	CATGTACCTGTCTTCCATTTTCTCCA	FE671221.1	-	-	-	-	-	-	-	-	-	-	-	-	-	-	-	-
443	CATGCTGATAAGGGTGATGCGCTTTA	FE671220.1	-	-	-	-	-	-	-	-	-	-	-	-	-	-	-	-
445	CATGGGCTGGGCCATATTCCAACTTA	FE671218.1	8e-07	Cicer arietinum partial mRNA for aquoporin-like water channel protein (mip1 gene)	AJ515031	Aquoporin-like water channel protein (Fragment)	Q8GTE0_CICAR	-	-	-	-	-	-	-	-	-	-	-
446	CATGGAAATTACTTGATCAGCAAGGG	FE671982.1	1e-05	Medicago truncatula adenosylhomocysteinase (AHC2) gene, complete cds	AY224189	Adenosylhomocysteinase; ( EC=3	Q84RD8_MEDTR	BE204804	2e-06	0	0	AY224189	0	Medicago truncatula adenosylhomocysteinase (AHC2) gene, complete cds	Adenosylhomocysteinase; ( EC=3.3.1.1)	Q84RD8_MEDTR	ID direct correlation	-
447	CATGAGCCTCTTTGGTATTGGAATCA	FE671981.1	-	-	-	-	-	-	-	-	-	-	-	-	-	-	-	-
448	CATGGTTTCGAGAGCGCGACGATTTC	FE671980.1	-	-	-	-	-	-	-	-	-	-	-	-	-	-	-	-
449	CATGCTGGCGATTTAGGAAATATCAA	FE671979.1	8e-07	Cicer arietinum mRNA for superoxide dismutase	AJ012739	Superoxide dismutase [Cu-Zn]; ( EC=1	Q9ZNQ4_CICAR	-	-	-	-	-	-	-	-	-	-	-
450	CATGACTTGTTGTACATCCCGGCAGC	FE671977.1	-	-	-	-	-	-	-	-	-	-	-	-	-	-	-	-
451	CATGTAGGGATGAGGTTGTTGATCAC	FE671975.1	-	-	-	-	-	-	-	-	-	-	-	-	-	-	-	-
452	CATGAATATCGCCTCACTAATCATTC	FE671217.1	-	-	-	-	-	-	-	-	-	-	-	-	-	-	-	-
453	CATGCTCATCCCACCAGCTTGTATCA	FE671215.1	-	-	-	-	-	-	-	-	-	-	-	-	-	-	-	-
454	CATGTTTCCTGCATTCCAGTTTGGCA	FE671213.1	-	-	-	-	-	TC116743	1e-07	0	0	X99348	0	V.radiata mRNA for pectinacetylesterase	Pectinacetylesterase precursor	Q41695_PHAAU	-	-
455	CATGACTAAGGTAACTCAAAGCTGAC	FE671212.1	-	-	-	-	-	-	-	-	-	-	-	-	-	-	-	-
456	CATGATCATACACAAACTCGGGAATC	FE671211.1	-	-	-	-	-	-	-	-	-	-	-	-	-	-	-	-
457	CATGAAGGATGTGCCTGGTTGGAAAG	FE671207.1	-	-	-	-	-	-	-	-	-	-	-	-	-	-	-	-
458	CATGATTCAGTTCTTTCACGAGTGAA	FE671973.1	-	-	-	-	-	-	-	-	-	-	-	-	-	-	-	-
459	CATGGGCTGATTCTCTTGGATCCAAA	FE671970.1	5e-05	Glycine max mRNA for peroxisomal fatty acid beta-oxidation multifunctional protein, complete cds	AB333787	Peroxisomal fatty acid beta-oxidation multifunctional protein	B0M199_SOYBN	-	-	-	-	-	-	-	-	-	-	-
460	CATGAGAATCAGCGACGTTTCATCAA	FE671969.1	-	-	-	-	-	-	-	-	-	-	-	-	-	-	-	-
461	CATGACGGTTTTTGCCGAACATAACT	FE671968.1	-	-	-	-	-	-	-	-	-	-	-	-	-	-	-	-
462	CATGGGCCACCCCATTCCCCGTTCAC	FE671967.1	-	-	-	-	-	-	-	-	-	-	-	-	-	-	-	-
463	CATGTTTTCAGCAGTAAAATCTTGCT	FE671963.1	-	-	-	-	-	-	-	-	-	-	-	-	-	-	-	-
464	CATGAAGAAGCTGGATTCTTGGAGGA	FE671205.1	-	-	-	-	-	-	-	-	-	-	-	-	-	-	-	-
467	CATGATTTTGTGAATGGACGATGAAT	FE671201.1	-	-	-	-	-	-	-	-	-	-	-	-	-	-	-	-
469	CATGCTATCGTTCTCCTCAGTTTATT	FE671199.1	-	-	-	-	-	-	-	-	-	-	-	-	-	-	-	-
470	CATGGTGTGGATGTAAGCAAAGAGAT	FE671197.1	-	-	-	-	-	-	-	-	-	-	-	-	-	-	-	-
471	CATGAACGTGAACGCAAGGGGATCGT	FE671196.1	-	-	-	-	-	-	-	-	-	-	-	-	-	-	-	-
472	CATGACTGTATTTTCTAACTTCTCAT	FE671195.1	-	-	-	-	-	-	-	-	-	-	-	-	-	-	-	-
473	CATGACAGCAGCAGCAGTGATAGTGA	FE671194.1	-	-	-	-	-	-	-	-	-	-	-	-	-	-	-	-
474	CATGAAATCTTCAGTTTTTCCACCAG	FE671577.1	-	-	-	-	-	-	-	-	-	-	-	-	-	-	-	-
475	CATGCAGGATTTATTGACAAAGGAGA	FE671576.1	-	-	-	-	-	-	-	-	-	-	-	-	-	-	-	-
477	CATGGGATTTTGTGAATTTGACTGTT	FE671574.1	-	-	-	-	-	-	-	-	-	-	-	-	-	-	-	-
478	CATGGAAAAAGTAACTGCCGCTGTCG	FE671572.1	8e-07	Cicer arietinum cultivar Vijay 14-3-3-like protein (1433) mRNA, 1433-2 allele, complete cds	EF643373	14-3-3-like protein	A5YM78_CICAR	-	-	-	-	-	-	-	-	-	-	-
479	CATGTTTTGAAGATTTAAAGAAGATA	FE671571.1	-	-	-	-	-	-	-	-	-	-	-	-	-	-	-	-
480	CATGCCGGAAGATGAAGAAGAAGTCG	FE671570.1	-	-	-	-	-	-	-	-	-	-	-	-	-	-	-	-
482	CATGCATATGATATGATATATAATAA	FE671567.1	-	-	-	-	-	-	-	-	-	-	-	-	-	-	-	-
484	CATGTTTGGCATTTAAAATTAGCAAA	FE671565.1	-	-	-	-	-	-	-	-	-	-	-	-	-	-	-	-
485	CATGATTGAACCTACTGAAAGTGAAA	FE671564.1	-	-	-	-	-	-	-	-	-	-	-	-	-	-	-	-
486	CATGTTCTCAGCGTAGTCCTCTTCGG	FE671562.1	-	-	-	-	-	-	-	-	-	-	-	-	-	-	-	-
487	CATGTCCTATCCTTGACTTACCAAAA	FE671561.1	-	-	-	-	-	-	-	-	-	-	-	-	-	-	-	-
489	CATGAAAGTTAGAGATGGTAAAGGAT	FE671558.1	-	-	-	-	-	-	-	-	-	-	-	-	-	-	-	-
491	CATGCTCTCCACCAGCTCCATAGCCT	FE671556.1	-	-	-	-	-	-	-	-	-	-	-	-	-	-	-	-
492	CATGTCTACAAAAAGCTGTCTCCGAG	FE671555.1	-	-	-	-	-	-	-	-	-	-	-	-	-	-	-	-
493	CATGGCGGTTCTATACCCTCTGATCT	FE671553.1	-	-	-	-	-	-	-	-	-	-	-	-	-	-	-	-
494	CATGGGTCTCTACGACCTCCTCAAAC	FE671552.1	-	-	-	-	-	-	-	-	-	-	-	-	-	-	-	-
496	CATGATGCTGAAACAGGAGCAGGCCA	FE671550.1	-	-	-	-	-	-	-	-	-	-	-	-	-	-	-	-
498	CATGGAAGCCAAAGAAAATTAAGAAC	FE671547.1	-	-	-	-	-	-	-	-	-	-	-	-	-	-	-	-
500	CATGAGGCCCGGCGTAGCGATAAAAC	FE671543.1	-	-	-	-	-	-	-	-	-	-	-	-	-	-	-	-
501	CATGAGAGGTGTCTACTTCAAAAATA	FE671541.1	-	-	-	-	-	-	-	-	-	-	-	-	-	-	-	-
503	CATGTGTATTGTAGGTCCCATAATCA	FE671539.1	-	-	-	-	-	-	-	-	-	-	-	-	-	-	-	-
505	CATGTTCTGATGTTAATTCGTCAGAG	FE671537.1	-	-	-	-	-	-	-	-	-	-	-	-	-	-	-	-
506	CATGACCCGGGGTCATTTTACCACTT	FE671536.1	-	-	-	-	-	-	-	-	-	-	-	-	-	-	-	-
507	CATGAAATAAAACTATAGTAGTTAAT	FE671535.1	-	-	-	-	-	-	-	-	-	-	-	-	-	-	-	-
510	CATGATCATTTCAGAGAAAAACCGTA	FE671532.1	-	-	-	-	-	-	-	-	-	-	-	-	-	-	-	-
511	CATGGAAACAGATCAAACGACGAATT	FE671531.1	-	-	-	-	-	-	-	-	-	-	-	-	-	-	-	-
512	CATGCTCATTGCTAAACCTTCCTTCC	FE671530.1	-	-	-	-	-	-	-	-	-	-	-	-	-	-	-	-
514	CATGGATTGCAGGTGGAAATTGGAGA	FE671528.1	-	-	-	-	-	-	-	-	-	-	-	-	-	-	-	-
515	CATGTCATCATAATTAGTGTAATCGA	FE671527.1	-	-	-	-	-	-	-	-	-	-	-	-	-	-	-	-
516	CATGCCGAGTATCAAACAAATAATAA	FE671524.1	-	-	-	-	-	-	-	-	-	-	-	-	-	-	-	-
517	CATGGCATCACATACTGAGCTAGCTG	FE671522.1	-	-	-	-	-	-	-	-	-	-	-	-	-	-	-	-
518	CATGATTGCCACTTAAAAATTTTTCA	FE671519.1	-	-	-	-	-	-	-	-	-	-	-	-	-	-	-	-
519	CATGGTGCGGCTGTAACTGTTTCTGA	FE671516.1	-	-	-	-	-	-	-	-	-	-	-	-	-	-	-	-
520	CATGCTAAAGATGAGTTAGAGCGCCA	FE671514.1	-	-	-	-	-	-	-	-	-	-	-	-	-	-	-	-
521	CATGCATTCAGTGACTATCAATGGCT	FE671513.1	8e-07	Caragana korshinskii var. intermedia oleate desaturase (FAD2-2) mRNA, complete cds	EF503621	Oleate desaturase	A4ZYU3_9FABA	TC114302	1e-07	0	0	EF503621	0	Caragana korshinskii var. intermedia oleate desaturase (FAD2-2) mRNA, complete cds	Oleate desaturase	A4ZYU3_9FABA	ID direct correlation	-
522	CATGTTACTTTGTTGGCTCATTCCCT	FE671512.1	-	-	-	-	-	-	-	-	-	-	-	-	-	-	-	-
523	CATGTCATCTCCCTTCTCCCTTCAAC	FE671511.1	-	-	-	-	-	-	-	-	-	-	-	-	-	-	-	-
524	CATGCCCAGGGTGTGGGATTTTCAAC	FE671509.1	-	-	-	-	-	-	-	-	-	-	-	-	-	-	-	-
525	CATGTGGAATGGAAATGGTGGTTACA	FE671507.1	-	-	-	-	-	-	-	-	-	-	-	-	-	-	-	-
526	CATGCCCTTGGTTAAGACCTGATGGT	FE671506.1	-	-	-	-	-	-	-	-	-	-	-	-	-	-	-	-
527	CATGGCATATACTCAAGGGAAAGGCT	FE671504.1	-	-	-	-	-	-	-	-	-	-	-	-	-	-	-	-
528	CATGTGAATCGTACTGACTACCAGCT	FE671502.1	-	-	-	-	-	-	-	-	-	-	-	-	-	-	-	-
529	CATGAAAGGCCTATTGTGTTGTGGCA	FE671501.1	-	-	-	-	-	-	-	-	-	-	-	-	-	-	-	-
530	CATGAAATATATCGCACTTTGTATTA	FE671500.1	-	-	-	-	-	-	-	-	-	-	-	-	-	-	-	-
531	CATGCAAGTGTGGCCACCAATTGGCA	FE671499.1	8e-07	Cicer arietinum mRNA for ribulose 1,5-bisphosphate carboxylase small subunit	AJ131050	Ribulose 1,5-bisphosphate carboxylase small subunit precursor; ( EC=4	Q9ZP07_CICAR	-	-	-	-	-	-	-	-	-	-	-
532	CATGACTTTTGGAAATGATGCTTTAT	FE671498.1	-	-	-	-	-	TC120520	1e-07	0	0	AJ222579	1e-33	Vicia faba mRNA for elongation factor 1-alpha (EF1-a)	Elongation factor 1-alpha; ( Short=EF-1-alpha)	EF1A_VICFA	-	-
533	CATGTATTGCAGCTTGACCTGTGGGG	FE671497.1	-	-	-	-	-	-	-	-	-	-	-	-	-	-	-	-
534	CATGCAAAAGGTACGCCGTTAGAGTG	FE671496.1	-	-	-	-	-	TC124761	1e-07	0	0	DQ219393	4e-35	Leucaena leucocephala clone A516 mitochondrial sequence	-	-	-	-
535	CATGATTAGAGTGCTATCCTTATATG	FE671495.1	8e-07	Cicer arietinum cultivar Vijay 14-3-3-like protein (1433) mRNA, 1433-2 allele, complete cds	EF643373	14-3-3-like protein	A5YM78_CICAR	-	-	-	-	-	-	-	-	-	-	-
536	CATGTTGTTGTAACTTGTTAGTACAT	FE671494.1	-	-	-	-	-	-	-	-	-	-	-	-	-	-	-	-
538	CATGGTGAGACTCACTGCTGACCTTA	FE671491.1	-	-	-	-	-	-	-	-	-	-	-	-	-	-	-	-
539	CATGTAGTGCATCAGGTTGAATGTCT	FE671490.1	-	-	-	-	-	-	-	-	-	-	-	-	-	-	-	-
540	CATGTGATTCAAACCTTAACTCAAAG	FE671489.1	-	-	-	-	-	-	-	-	-	-	-	-	-	-	-	-
541	CATGCTGGACAAGTACAAGAACTATG	FE671488.1	-	-	-	-	-	-	-	-	-	-	-	-	-	-	-	-
542	CATGGATCTTAAGAATTTCCATCCTT	FE671487.1	-	-	-	-	-	-	-	-	-	-	-	-	-	-	-	-
543	CATGGCTTGCATATAAAGAAAATAGA	FE671486.1	-	-	-	-	-	-	-	-	-	-	-	-	-	-	-	-
544	CATGGAAGACTGAAGAACATTAAGGT	FE671485.1	-	-	-	-	-	-	-	-	-	-	-	-	-	-	-	-
545	CATGTAACTTATCAAACGAGCCTTTA	FE673305.1	-	-	-	-	-	-	-	-	-	-	-	-	-	-	-	-
547	CATGCAGTAATTTCGAAATAGCAGTA	FE673301.1	-	-	-	-	-	-	-	-	-	-	-	-	-	-	-	-
550	CATGTGACCAGGAGGAAACAATAGAC	FE673297.1	-	-	-	-	-	-	-	-	-	-	-	-	-	-	-	-
551	CATGTATAAAATAACCCTCCATCACT	FE673295.1	-	-	-	-	-	-	-	-	-	-	-	-	-	-	-	-
552	CATGTCGTCTTGGTTGAGATCTGCGG	FE673294.1	-	-	-	-	-	-	-	-	-	-	-	-	-	-	-	-
554	CATGAACCTGCTAGGAGGCCTAGCTT	FE673292.1	-	-	-	-	-	-	-	-	-	-	-	-	-	-	-	-
555	CATGTTATGACGAATCTCGGTGAGAA	FE673289.1	8e-07	Cicer arietinum mRNA for CaM protein	Y09853	CaM protein	Q7DLT8_CICAR	-	-	-	-	-	-	-	-	-	-	-
556	CATGTCCGTTCTTGTTACTGGTTCAG	FE673287.1	-	-	-	-	-	-	-	-	-	-	-	-	-	-	-	-
557	CATGAGTCCCATCATAGAGCAAGAGA	FE673286.1	-	-	-	-	-	TC128128	1e-07	0	0	AY575953	8e-93	Glycine max beta-carotene hydroxylase mRNA, complete cds	Beta-carotene hydroxylase	Q6PV95_SOYBN	-	-
558	CATGATCTTATATAAGTTAATAAACC	FE673285.1	-	-	-	-	-	-	-	-	-	-	-	-	-	-	-	-
559	CATGCAACCAAAATCTCAATATTGGT	FE673284.1	-	-	-	-	-	-	-	-	-	-	-	-	-	-	-	-
561	CATGTCAATGATGGAATGAATGATGT	FE673281.1	-	-	-	-	-	-	-	-	-	-	-	-	-	-	-	-
562	CATGCTTCTTCGCCATTTCCATAAGC	FE673280.1	-	-	-	-	-	-	-	-	-	-	-	-	-	-	-	-
563	CATGGGAAAGTTTTTCGCTGAGAGAC	FE673279.1	-	-	-	-	-	-	-	-	-	-	-	-	-	-	-	-
564	CATGCTTGTACTGGAAAGAAGGAAAA	FE673277.1	-	-	-	-	-	-	-	-	-	-	-	-	-	-	-	-
565	CATGCTTATCCCAAATAGTCACATTA	FE673276.1	-	-	-	-	-	-	-	-	-	-	-	-	-	-	-	-
566	CATGTGTTGTTATGTGATCCCACACC	FE673275.1	-	-	-	-	-	-	-	-	-	-	-	-	-	-	-	-
567	CATGATAGAGATTCAACGGACGAGGA	FE673272.1	-	-	-	-	-	-	-	-	-	-	-	-	-	-	-	-
568	CATGGCTGCTGGACTTCATCATCGTT	FE673271.1	-	-	-	-	-	-	-	-	-	-	-	-	-	-	-	-
572	CATGGATGGGCGCATTTTGGGCTCAG	FE673267.1	-	-	-	-	-	-	-	-	-	-	-	-	-	-	-	-
574	CATGGTCACGTGGACCACAAAGGTCA	FE673265.1	-	-	-	-	-	-	-	-	-	-	-	-	-	-	-	-
576	CATGAACAATTTGGACGAGAGATTCG	FE673263.1	-	-	-	-	-	-	-	-	-	-	-	-	-	-	-	-
577	CATGAACATAATTACCACCACCATTG	FE673261.1	-	-	-	-	-	-	-	-	-	-	-	-	-	-	-	-
578	CATGTTATGCCTTCTAGGTGTACTGA	FE673260.1	-	-	-	-	-	-	-	-	-	-	-	-	-	-	-	-
579	CATGATATCCGTCACTTTCACTCTCT	FE673259.1	-	-	-	-	-	-	-	-	-	-	-	-	-	-	-	-
580	CATGAGAGAAAGAGAGTTCCTCCAAA	FE673258.1	-	-	-	-	-	TC117344	1e-07	0	0	AF452454	0	Glycine max ATP sulfurylase mRNA, complete cds	ATP sulfurylase	Q8SAG1_SOYBN	-	-
581	CATGGGACAAAGACAGTTGGTCTGCC	FE673257.1	-	-	-	-	-	-	-	-	-	-	-	-	-	-	-	-
583	CATGAGTAAACTTCTCGCTAGAACTA	FE673254.1	-	-	-	-	-	-	-	-	-	-	-	-	-	-	-	-
584	CATGAGTGACCCTAGTGGAAACTACG	FE673252.1	-	-	-	-	-	-	-	-	-	-	-	-	-	-	-	-
585	CATGCAGTTCGAGGCAACTACTCAGT	FE673250.1	-	-	-	-	-	-	-	-	-	-	-	-	-	-	-	-
586	CATGTTGCGTTATGTCAAGATTGTCT	FE673249.1	8e-07	-	AC161102	-	-	-	-	-	-	-	-	-	-	-	-	-
588	CATGTATTTAAAGGTGAAGGATTTCC	FE673247.1	-	-	-	-	-	-	-	-	-	-	-	-	-	-	-	-
589	CATGCTTCACTGCCCAATCCTCAAGG	FE673246.1	-	-	-	-	-	-	-	-	-	-	-	-	-	-	-	-
591	CATGTGCTCAAAAATATGAGAAAAAT	FE673242.1	-	-	-	-	-	-	-	-	-	-	-	-	-	-	-	-
592	CATGGTCCGGATGTTCACCAGGCTGA	FE673241.1	1e-05	Glycine max myo-inositol-1-phosphate synthase (MIPS4) gene, complete cds	DQ323908	Myo-inositol-1-phosphate synthase	Q2MJR3_SOYBN	-	-	-	-	-	-	-	-	-	-	-
593	CATGTGAACCTTCCTTAAAATCCTCT	FE673240.1	-	-	-	-	-	-	-	-	-	-	-	-	-	-	-	-
594	CATGGTGTGCTTCCAAGGGGAACATA	FE673238.1	-	-	-	-	-	-	-	-	-	-	-	-	-	-	-	-
595	CATGCTCCCGAGTTTGTTCCAAGAAG	FE673237.1	-	-	-	-	-	-	-	-	-	-	-	-	-	-	-	-
596	CATGATAGAAAGAAATCCAATTAAAA	FE673236.1	-	-	-	-	-	-	-	-	-	-	-	-	-	-	-	-
597	CATGTTTGAGCACATATTGCACCGAT	FE673235.1	-	-	-	-	-	-	-	-	-	-	-	-	-	-	-	-
598	CATGGGCGCGTTTCTCCTTGCTGCTG	FE673234.1	-	-	-	-	-	-	-	-	-	-	-	-	-	-	-	-
599	CATGCCACTAAATTGGATTTACAGTA	FE673232.1	-	-	-	-	-	-	-	-	-	-	-	-	-	-	-	-
600	CATGACTATAAAAGGGACCCACAAAA	FE673230.1	-	-	-	-	-	-	-	-	-	-	-	-	-	-	-	-
602	CATGGATGGGATTTAAACGCCGTTAG	FE673228.1	-	-	-	-	-	-	-	-	-	-	-	-	-	-	-	-
604	CATGAGGCTGAGATTGCCCAAGCTGC	FE673226.1	8e-07	Cicer arietinum mRNA for GTP-binding protein (ORF1), clone CanGBP-2	AJ299064	GTP-binding protein	Q9FSZ5_CICAR	-	-	-	-	-	-	-	-	-	-	-
605	CATGCATTGTCATTTAAAGTTGCACA	FE673224.1	-	-	-	-	-	-	-	-	-	-	-	-	-	-	-	-
606	CATGCCCGGTCGTACTCATAACCGCA	FE673223.1	8e-07	M.sativa 26S rRNA	Z11498	-	-	TC122237	1e-07	0	0	EF571299	0	Glycyrrhiza uralensis 26S ribosomal RNA, partial sequence	-	-	-	Correlated RNA description
607	CATGATGATTCTCCGGATTACACAAT	FE673222.1	-	-	-	-	-	-	-	-	-	-	-	-	-	-	-	-
609	CATGTAACGACGTTGAGTTCGTTCTG	FE673219.1	-	-	-	-	-	-	-	-	-	-	-	-	-	-	-	-
612	CATGCAATCTTGATTTATTTTTCAGT	FE673211.1	-	-	-	-	-	-	-	-	-	-	-	-	-	-	-	-
613	CATGAAAATGGATCTGCAAACACTCT	FE673210.1	-	-	-	-	-	-	-	-	-	-	-	-	-	-	-	-
614	CATGACACCTTTGACTTCAAAAACCT	FE672821.1	-	-	-	-	-	-	-	-	-	-	-	-	-	-	-	-
615	CATGAGAAAATGGGAGCCCTGTCGTA	FE672820.1	-	-	-	-	-	-	-	-	-	-	-	-	-	-	-	-
616	CATGAACCTGATACTCCCTCTCCGGG	FE672819.1	-	-	-	-	-	-	-	-	-	-	-	-	-	-	-	-
617	CATGTAGTGAAGATACTTTTGTACCA	FE672817.1	-	-	-	-	-	-	-	-	-	-	-	-	-	-	-	-
618	CATGGAGCGGATCAGGGGATGGAATT	FE672816.1	-	-	-	-	-	-	-	-	-	-	-	-	-	-	-	-
620	CATGCTTTGTGAGTCATACGGCAATA	FE672814.1	-	-	-	-	-	-	-	-	-	-	-	-	-	-	-	-
621	CATGTGGACGTTTAAGTGCAGCTCTT	FE672813.1	-	-	-	-	-	-	-	-	-	-	-	-	-	-	-	-
623	CATGGAACCGCAGACGGAGAATGAGA	FE672811.1	-	-	-	-	-	-	-	-	-	-	-	-	-	-	-	-
624	CATGCTGTGATTTAAGGGACTCCTCC	FE672810.1	-	-	-	-	-	-	-	-	-	-	-	-	-	-	-	-
625	CATGGCTTTCCAATCAAACCCCAATT	FE672809.1	-	-	-	-	-	-	-	-	-	-	-	-	-	-	-	-
626	CATGGATGAATGCGAAAGGGCTGTGC	FE672806.1	-	-	-	-	-	-	-	-	-	-	-	-	-	-	-	-
627	CATGACTTGAGTTCTATTGGTGGTAA	FE672805.1	-	-	-	-	-	-	-	-	-	-	-	-	-	-	-	-
628	CATGACAGGGGGCTTACACCTTACGA	FE672803.1	-	-	-	-	-	TC123656	1e-07	0	0	AJ344107	0	Lupinus albus mRNA for ATP citrate lyase a-subunit (acla gene)	ATP citrate lyase a-subunit; ( EC=4.1.3.8)	Q93YH4_LUPAL	-	-
629	CATGACAAGGCGCGCGGGGAAGGGTG	FE672802.1	-	-	-	-	-	-	-	-	-	-	-	-	-	-	-	-
630	CATGATATGATAATACTGCTGCCCTG	FE672800.1	-	-	-	-	-	-	-	-	-	-	-	-	-	-	-	-
631	CATGCCGATAAATTTAGAGGATTGAA	FE672799.1	-	-	-	-	-	-	-	-	-	-	-	-	-	-	-	-
632	CATGTTGTACGATGTTTTGACGAAAA	FE672797.1	-	-	-	-	-	-	-	-	-	-	-	-	-	-	-	-
633	CATGTGGTATAATTCGATACTACGCG	FE672795.1	-	-	-	-	-	-	-	-	-	-	-	-	-	-	-	-
634	CATGCAGAAAGGTTCCCCACTCCTCC	FE672794.1	8e-07	Cicer arietinum mRNA for catalase	AJ131046	Catalase (Fragment); ( EC=1	Q9ZRU4_CICAR	-	-	-	-	-	-	-	-	-	-	-
635	CATGGCGGTCCCGGTATGGGAGCAAT	FE672793.1	-	-	-	-	-	-	-	-	-	-	-	-	-	-	-	-
636	CATGACCAACCGCCTTCTCGCTCGGA	FE672792.1	-	-	-	-	-	-	-	-	-	-	-	-	-	-	-	-
638	CATGTGTCGTTGGCTTTAGGCCACCG	FE672790.1	-	-	-	-	-	-	-	-	-	-	-	-	-	-	-	-
639	CATGCGACCTGAACCTTTCGGTACCA	FE672787.1	-	-	-	-	-	-	-	-	-	-	-	-	-	-	-	-
640	CATGTAGTTCATCGGCGGAGGTCACA	FE672785.1	-	-	-	-	-	-	-	-	-	-	-	-	-	-	-	-
641	CATGGATTTGTGGTGGCGGTCACAGG	FE672783.1	-	-	-	-	-	-	-	-	-	-	-	-	-	-	-	-
642	CATGATGAACTTATTGCCAATGCTGC	FE672781.1	8e-07	Cicer arietinum mRNA for cytosolic fructose-1,6-bisphosphate aldolase	AJ005041	Fructose-bisphosphate aldolase, cytoplasmic isozyme; ( EC=4	ALF_CICAR	-	-	-	-	-	-	-	-	-	-	-
643	CATGCATCATCTTTCACAACAACCGT	FE672780.1	-	-	-	-	-	-	-	-	-	-	-	-	-	-	-	-
644	CATGAAGGGAAAAAACTACTTGGTCT	FE672778.1	-	-	-	-	-	-	-	-	-	-	-	-	-	-	-	-
645	CATGCTCTTCTCTCTATCTTCATAAA	FE672775.1	-	-	-	-	-	-	-	-	-	-	-	-	-	-	-	-
646	CATGCGGCGCAGCTCCACAACTCACA	FE672774.1	-	-	-	-	-	-	-	-	-	-	-	-	-	-	-	-
647	CATGTGAAGTTACAAGCCACCTCTTC	FE672773.1	-	-	-	-	-	-	-	-	-	-	-	-	-	-	-	-
648	CATGTTGAGCCTCTCAAAAGGACCTG	FE672771.1	-	-	-	-	-	-	-	-	-	-	-	-	-	-	-	-
649	CATGCGCGAACACAATGCTCGTTTTA	FE672770.1	-	-	-	-	-	-	-	-	-	-	-	-	-	-	-	-
650	CATGTGCAAATATCAACCTAATCAAC	FE672769.1	-	-	-	-	-	-	-	-	-	-	-	-	-	-	-	-
651	CATGAATGGTGCACCCTCCATCAGTG	FE672767.1	-	-	-	-	-	-	-	-	-	-	-	-	-	-	-	-
652	CATGTCGAAGTTCAGTAAAAGCTACG	FE672766.1	-	-	-	-	-	-	-	-	-	-	-	-	-	-	-	-
653	CATGGAAATGGAAGAAAAAGTCGAGA	FE672765.1	-	-	-	-	-	-	-	-	-	-	-	-	-	-	-	-
654	CATGCAATCTGCTGGTCAACCTGCTG	FE672763.1	-	-	-	-	-	-	-	-	-	-	-	-	-	-	-	-
655	CATGGAGACAATTTTTGGGAGAGAAC	FE672762.1	-	-	-	-	-	-	-	-	-	-	-	-	-	-	-	-
656	CATGCTGTTGCACCTGATCTAAGAGG	FE672761.1	-	-	-	-	-	-	-	-	-	-	-	-	-	-	-	-
657	CATGACGGCAGTAATTTTTGTAAAAA	FE672760.1	-	-	-	-	-	-	-	-	-	-	-	-	-	-	-	-
658	CATGTTCTGTTGAGTGTACTAAGGCA	FE672758.1	-	-	-	-	-	-	-	-	-	-	-	-	-	-	-	-
659	CATGATGACGCTGTTACAACTTTCGT	FE672757.1	-	-	-	-	-	-	-	-	-	-	-	-	-	-	-	-
660	CATGCAAGTCGGACGGGAAGTGGTGT	FE672756.1	8e-07	Canavalia gladiata cultivar NTU-CG01 19S ribosomal RNA gene, partial sequence; mitochondrial	EU835853	-	0	-	-	-	-	-	-	-	-	-	-	-
661	CATGATAAGCGTACCTATGTCTTTAT	FE672755.1	-	-	-	-	-	-	-	-	-	-	-	-	-	-	-	-
662	CATGCAAATAATAATAAGAGAGAAAA	FE672754.1	-	-	-	-	-	-	-	-	-	-	-	-	-	-	-	-
663	CATGGGGCATACGGTGGAGGGAGTGG	FE672752.1	-	-	-	-	-	-	-	-	-	-	-	-	-	-	-	-
664	CATGCTGACAGTTTACTGGTCCACAT	FE672751.1	-	-	-	-	-	-	-	-	-	-	-	-	-	-	-	-
665	CATGACATCCAGTGTCCCTCCTGATG	FE672748.1	-	-	-	-	-	-	-	-	-	-	-	-	-	-	-	-
666	CATGCCCTCTAAATCTACGGCAGAAC	FE672746.1	-	-	-	-	-	-	-	-	-	-	-	-	-	-	-	-
667	CATGGGAACTGAAAAAAAGTACAAGT	FE672745.1	-	-	-	-	-	-	-	-	-	-	-	-	-	-	-	-
668	CATGTATTGAAGGCTTTAGGGGTTCT	FE672742.1	-	-	-	-	-	-	-	-	-	-	-	-	-	-	-	-
669	CATGAGTGGACGGAGTGTCCGTACGC	FE672741.1	-	-	-	-	-	-	-	-	-	-	-	-	-	-	-	-
670	CATGCACGCTGTAAACCACGGCCGTG	FE672740.1	-	-	-	-	-	-	-	-	-	-	-	-	-	-	-	-
671	CATGACCAGGTAAGGATTTTGAAGTC	FE672739.1	-	-	-	-	-	-	-	-	-	-	-	-	-	-	-	-
672	CATGTCTCTCTCAGTCCTGAGCACTT	FE672738.1	-	-	-	-	-	-	-	-	-	-	-	-	-	-	-	-
673	CATGGATTCGAGTCTCTTTGGGAAAG	FE672735.1	-	-	-	-	-	-	-	-	-	-	-	-	-	-	-	-
674	CATGCAACCCTATCGGGTCACAGTTG	FE672734.1	-	-	-	-	-	-	-	-	-	-	-	-	-	-	-	-
675	CATGCGGATCCCGAATCGCCACCCTC	FE672730.1	-	-	-	-	-	-	-	-	-	-	-	-	-	-	-	-
676	CATGCTCCTTATAAACAGTCTTCCTC	FE671961.1	-	-	-	-	-	-	-	-	-	-	-	-	-	-	-	-
678	CATGACCTGTTTCAGTGAAATCAAAT	FE671957.1	-	-	-	-	-	-	-	-	-	-	-	-	-	-	-	-
680	CATGGTGCTAATCGCGGTACAGATAT	FE671954.1	-	-	-	-	-	-	-	-	-	-	-	-	-	-	-	-
681	CATGTGAAATACACGGACTACGTACG	FE671953.1	-	-	-	-	-	-	-	-	-	-	-	-	-	-	-	-
683	CATGAATGACTGGGTTTTGTCACTTT	FE671193.1	-	-	-	-	-	-	-	-	-	-	-	-	-	-	-	-
685	CATGGATAGGAAAATCTGTTCAATGA	FE671191.1	-	-	-	-	-	-	-	-	-	-	-	-	-	-	-	-
686	CATGTGGATACTGCATCATAAAACTG	FE671190.1	-	-	-	-	-	-	-	-	-	-	-	-	-	-	-	-
687	CATGATCTTAATGTTCCGTATGAGGG	FE671188.1	-	-	-	-	-	-	-	-	-	-	-	-	-	-	-	-
688	CATGGTTGATGAAGCCGAATCCGAAA	FE671187.1	-	-	-	-	-	-	-	-	-	-	-	-	-	-	-	-
689	CATGGCAGCATTGACGCTGATCTCAG	FE671186.1	-	-	-	-	-	TC129111	1e-07	0	0	AB078603	0	Pisum sativum SN4TDR mRNA for 110 kDa 4SNc-Tudor domain protein, complete cds	110 kDa 4SNc-Tudor domain protein	Q8L5C2_PEA	-	-
690	CATGGTAGCACCATTTCCTCCAAAAC	FE671185.1	-	-	-	-	-	TC117157	1e-07	0	0	L20806	8e-91	Glycine max seed maturation protein (GmPM3) mRNA, complete cds	PGmPM3	Q39872_SOYBN	-	-
691	CATGTATAAGATGAGCCTCCATCACT	FE671184.1	8e-07	Cicer arietinum mRNA for lipid transfer protein	AJ002958	Non-specific lipid-transfer protein precursor; ( Short=LTP)	NLTP_CICAR	-	-	-	-	-	-	-	-	-	-	-
692	CATGAGTGAGCATTATGATATTCCTA	FE671183.1	-	-	-	-	-	-	-	-	-	-	-	-	-	-	-	-
693	CATGTCCGCCATTTCCGCTGTACTTT	FE671182.1	-	-	-	-	-	-	-	-	-	-	-	-	-	-	-	-
694	CATGCCGGTATTGGTGGAATGGGTGG	FE671947.1	-	-	-	-	-	-	-	-	-	-	-	-	-	-	-	-
695	CATGAAAAAGGATGTACTATGGGTTA	FE671945.1	-	-	-	-	-	-	-	-	-	-	-	-	-	-	-	-
696	CATGTCTTGGTTATCTTCGAGGTGGT	FE671943.1	-	-	-	-	-	-	-	-	-	-	-	-	-	-	-	-
697	CATGTGTGGACACGTGAAACGCCATC	FE671941.1	-	-	-	-	-	-	-	-	-	-	-	-	-	-	-	-
698	CATGTAAGAAAGTCAACGTTAACCGG	FE671940.1	-	-	-	-	-	-	-	-	-	-	-	-	-	-	-	-
699	CATGGCCCCCGAGTGTGGCCAAAATG	FE671939.1	-	-	-	-	-	-	-	-	-	-	-	-	-	-	-	-
700	CATGACCTCACTTGGGTTAACATTCT	FE671938.1	-	-	-	-	-	-	-	-	-	-	-	-	-	-	-	-
701	CATGCCGATGCCACTTCCACTTCCGC	FE671181.1	-	-	-	-	-	-	-	-	-	-	-	-	-	-	-	-
702	CATGAGTGATGTTTTGTTAAGATATA	FE671180.1	-	-	-	-	-	-	-	-	-	-	-	-	-	-	-	-
704	CATGTTGAGAAAAAAATCTGATCCAC	FE671178.1	-	-	-	-	-	-	-	-	-	-	-	-	-	-	-	-
705	CATGGGTGACACGTGGCTCGCTGACT	FE671177.1	-	-	-	-	-	-	-	-	-	-	-	-	-	-	-	-
706	CATGAAGCAGCCCACTTTTTGATTGC	FE671176.1	-	-	-	-	-	-	-	-	-	-	-	-	-	-	-	-
707	CATGGTTCCAAAGTACAACAAGGAAG	FE671175.1	-	-	-	-	-	-	-	-	-	-	-	-	-	-	-	-
708	CATGTATTCTAGGGCTACAACATTTA	FE671174.1	-	-	-	-	-	-	-	-	-	-	-	-	-	-	-	-
709	CATGTAGCCTTGGAGAAAGCCAAAAA	FE671173.1	-	-	-	-	-	-	-	-	-	-	-	-	-	-	-	-
710	CATGGATTTGAGGAACTTGGAGAGGG	FE671171.1	-	-	-	-	-	-	-	-	-	-	-	-	-	-	-	-
711	CATGCTAATGCTAATGCTTGTGCAAC	FE671170.1	-	-	-	-	-	-	-	-	-	-	-	-	-	-	-	-
712	CATGGAGATCTGCTGGGATGCGGCGC	FE671937.1	-	-	-	-	-	-	-	-	-	-	-	-	-	-	-	-
713	CATGATCCTAGGGATAATCAGTGTTC	FE671935.1	-	-	-	-	-	-	-	-	-	-	-	-	-	-	-	-
714	CATGGTGATCTAGTTATTTGTCTCAC	FE671933.1	-	-	-	-	-	-	-	-	-	-	-	-	-	-	-	-
717	CATGAAAAACAACCCTCTTGTGCAAT	FE671929.1	-	-	-	-	-	-	-	-	-	-	-	-	-	-	-	-
719	CATGCTGTCCTCCAAAAGTCTCATTA	FE671169.1	-	-	-	-	-	-	-	-	-	-	-	-	-	-	-	-
720	CATGAGGAGCGACCGCGGAGTACTCT	FE671167.1	-	-	-	-	-	-	-	-	-	-	-	-	-	-	-	-
721	CATGAGCCTTAAGATGTTCCTCTAAA	FE671166.1	-	-	-	-	-	-	-	-	-	-	-	-	-	-	-	-
722	CATGCATAACATCTGGACTTCAAACT	FE671165.1	-	-	-	-	-	-	-	-	-	-	-	-	-	-	-	-
723	CATGTTAAAGATTATGCTAGAGAGTA	FE671162.1	-	-	-	-	-	-	-	-	-	-	-	-	-	-	-	-
726	CATGTGTGGGCAACTTGGAACCACCC	FE671158.1	-	-	-	-	-	-	-	-	-	-	-	-	-	-	-	-
727	CATGAAAATTTGCATTTGTCGTTGTG	FE671925.1	-	-	-	-	-	-	-	-	-	-	-	-	-	-	-	-
728	CATGCTCTTCTACGGTCCTCCCGGCA	FE671923.1	-	-	-	-	-	-	-	-	-	-	-	-	-	-	-	-
729	CATGCTTGACACCAAGGGTCCTGAAG	FE671922.1	-	-	-	-	-	-	-	-	-	-	-	-	-	-	-	-
730	CATGGCTTGAGAGTAAAGGTTTGAAG	FE671919.1	-	-	-	-	-	-	-	-	-	-	-	-	-	-	-	-
732	CATGCCACATTAGCAGCTGCACAAAC	FE671917.1	-	-	-	-	-	-	-	-	-	-	-	-	-	-	-	-
733	CATGATGAAGTGAAAACTGTGCTTAA	FE671916.1	-	-	-	-	-	-	-	-	-	-	-	-	-	-	-	-
734	CATGATCAAAAAAATTGCCTACAAAA	FE671915.1	-	-	-	-	-	-	-	-	-	-	-	-	-	-	-	-
735	CATGGCGGCGGCCTCGTCTTCGTCTC	FE671914.1	-	-	-	-	-	-	-	-	-	-	-	-	-	-	-	-
736	CATGAAGTATGTCTCCTCTACACTAT	FE671157.1	-	-	-	-	-	-	-	-	-	-	-	-	-	-	-	-
737	CATGGAGTCTTCGTGTTCGTCGGAAG	FE671155.1	-	-	-	-	-	-	-	-	-	-	-	-	-	-	-	-
738	CATGTCCGCAATGGGAGAAGAACAGA	FE671153.1	-	-	-	-	-	-	-	-	-	-	-	-	-	-	-	-
739	CATGGTTTCGAGAGCGCAACGATTTC	FE671152.1	-	-	-	-	-	-	-	-	-	-	-	-	-	-	-	-
742	CATGTCTACTCCGGCGAAACGACTCT	FE671146.1	-	-	-	-	-	-	-	-	-	-	-	-	-	-	-	-
743	CATGTGGTCAGGCATTAATTAAGCAA	FE671912.1	-	-	-	-	-	-	-	-	-	-	-	-	-	-	-	-
744	CATGTTGTGGTGGAGTGAAGAGAGTT	FE671910.1	-	-	-	-	-	-	-	-	-	-	-	-	-	-	-	-
745	CATGTTACTCTCAGCCTCAGTGAACT	FE671909.1	-	-	-	-	-	TC118205	1e-07	0	0	X60216	0	G.max mRNA for beta-tubulin, partial cds	Tubulin beta chain (Fragment); (AltName: Full=Beta-tubulin)	TBB3_SOYBN	-	-
746	CATGACAAGGAGAACATTCTTAATCA	FE671908.1	-	-	-	-	-	-	-	-	-	-	-	-	-	-	-	-
747	CATGAGTATGTTGGTAAGTATCAGGA	FE671907.1	-	-	-	-	-	-	-	-	-	-	-	-	-	-	-	-
748	CATGTGCAATCGCAGATTCGTTCAAG	FE671905.1	-	-	-	-	-	-	-	-	-	-	-	-	-	-	-	-
749	CATGTTAATGACCCGATACAATTTTT	FE671902.1	-	-	-	-	-	-	-	-	-	-	-	-	-	-	-	-
750	CATGAACCATCCAGGACAGATCGGAA	FE671145.1	8e-07	Cicer arietinum mRNA for elongation factor 1-alpha (clone CanEF1-a2), partial	AJ010225	Elongation factor 1-alpha (Fragment)	Q9SB99_CICAR	-	-	-	-	-	-	-	-	-	-	-
752	CATGTCAGTCCTTATCAAATATGCAA	FE671142.1	-	-	-	-	-	-	-	-	-	-	-	-	-	-	-	-
754	CATGGGTATGATTTAAGGTGGAAAAC	FE671140.1	-	-	-	-	-	-	-	-	-	-	-	-	-	-	-	-
755	CATGAGGAATTTCACAGTTCCGCTCA	FE671139.1	8e-07	Pisum sativum serine/threonine protein phosphatase 2A mRNA, complete cds	AF305635	Phytochrome-associated serine/threonine protein phosphatase; ( EC=3	FYPP_PEA	TC119877	2e-06	0	0	AF305635	0	Pisum sativum serine/threonine protein phosphatase 2A mRNA, complete cds	Phytochrome-associated serine/threonine protein phosphatase; ( EC=3.1.3.16; AltName: Full=PsFyPP)	FYPP_PEA	ID direct correlation	-
756	CATGTTTTCCAATCGAGGCAGTTTAT	FE671137.1	-	-	-	-	-	-	-	-	-	-	-	-	-	-	-	-
757	CATGAAGGATGCTCTCATACAGCAAG	FE671136.1	-	-	-	-	-	-	-	-	-	-	-	-	-	-	-	-
758	CATGGATCCCGTCCTTGGCCAAGCCA	FE671134.1	-	-	-	-	-	-	-	-	-	-	-	-	-	-	-	-
760	CATGCAATGAAGAAGATTTTGCTCTT	FE671898.1	-	-	-	-	-	-	-	-	-	-	-	-	-	-	-	-
761	CATGATAAAGAATCCAACTGTACAAA	FE671896.1	-	-	-	-	-	-	-	-	-	-	-	-	-	-	-	-
762	CATGCATCTACTCCATCTTGATGCTC	FE671895.1	-	-	-	-	-	-	-	-	-	-	-	-	-	-	-	-
763	CATGCAAAGACCACAGAATTCAAAGG	FE671894.1	-	-	-	-	-	-	-	-	-	-	-	-	-	-	-	-
764	CATGAAGTTCCCTGTCCGTGCACGGA	FE671893.1	-	-	-	-	-	-	-	-	-	-	-	-	-	-	-	-
765	CATGTTCCATTGATAGACAGACTTAG	FE671891.1	-	-	-	-	-	-	-	-	-	-	-	-	-	-	-	-
766	CATGTTGAATGTAAATTTGCTTATGC	FE671890.1	-	-	-	-	-	-	-	-	-	-	-	-	-	-	-	-
768	CATGGGGCTACCAAAAAATTTAGGAT	FE671130.1	-	-	-	-	-	-	-	-	-	-	-	-	-	-	-	-
769	CATGAGGAGCGGGGGCCCGGAGTCTC	FE671129.1	-	-	-	-	-	-	-	-	-	-	-	-	-	-	-	-
771	CATGTACTAGGGTGTATGTGCGACTC	FE671127.1	-	-	-	-	-	TC117508	1e-07	0	0	AC145820	0	Cicer arietinum strain WR-315, cultivar clone cpchlor map chloroplast, complete sequence	-	-	-	-
773	CATGTTGTTTGATAGAACAACAACCT	FE671125.1	-	-	-	-	-	-	-	-	-	-	-	-	-	-	-	-
774	CATGTTATATATATAATGCGTAAATA	FE671124.1	-	-	-	-	-	-	-	-	-	-	-	-	-	-	-	-
775	CATGTACACATTCAAATGCTGATATC	FE671123.1	-	-	-	-	-	-	-	-	-	-	-	-	-	-	-	-
776	CATGTGACCCGGAGTTGGTGAAGCTA	FE671122.1	-	-	-	-	-	-	-	-	-	-	-	-	-	-	-	-
777	CATGTGTGAGTGATCGCAATTGTGCT	FE671889.1	-	-	-	-	-	-	-	-	-	-	-	-	-	-	-	-
778	CATGTCGATGAAAGAGTGCGACCACC	FE671887.1	-	-	-	-	-	-	-	-	-	-	-	-	-	-	-	-
779	CATGAGGGGATTTACCCCCTCAACAC	FE671886.1	-	-	-	-	-	-	-	-	-	-	-	-	-	-	-	-
780	CATGTTCTTGTCACTCAATTCAAGGT	FE671885.1	-	-	-	-	-	TC121032	2e-06	0	0	EU041722	0	Pisum sativum fiddlehead-like protein mRNA, partial cds	Fiddlehead-like protein (Fragment)	A7X6P9_PEA	-	-
781	CATGAAAGGCAGGAAAAAGAGGAATC	FE671884.1	-	-	-	-	-	-	-	-	-	-	-	-	-	-	-	-
782	CATGAAGTGATTGTTACTTTGGATTG	FE671883.1	-	-	-	-	-	-	-	-	-	-	-	-	-	-	-	-
783	CATGGAATGGCTAATGGCACAGAAAT	FE671882.1	-	-	-	-	-	-	-	-	-	-	-	-	-	-	-	-
784	CATGTCGGTGTCAATACGCATTGTTA	FE671879.1	-	-	-	-	-	-	-	-	-	-	-	-	-	-	-	-
785	CATGGAGTTCCCACAAATCAGTGCAT	FE671878.1	-	-	-	-	-	-	-	-	-	-	-	-	-	-	-	-
787	CATGCATAATGGTTTGGGGGGCACAA	FE671118.1	-	-	-	-	-	-	-	-	-	-	-	-	-	-	-	-
788	CATGTTGTTGAGGAGTGCAAATTGAG	FE671117.1	-	-	-	-	-	-	-	-	-	-	-	-	-	-	-	-
789	CATGACATAATTTATAATGGTGTTGG	FE671116.1	-	-	-	-	-	-	-	-	-	-	-	-	-	-	-	-
790	CATGATTGTGTAATTTGTTGATGGAT	FE671115.1	-	-	-	-	-	-	-	-	-	-	-	-	-	-	-	-
794	CATGTTTTGGGTTTGCAGCCAAAATG	FE671110.1	-	-	-	-	-	-	-	-	-	-	-	-	-	-	-	-
795	CATGCCACAACAACATCCAAATGACG	FE671877.1	-	-	-	-	-	-	-	-	-	-	-	-	-	-	-	-
796	CATGCCGGTGAAACGACGACGTATGC	FE671873.1	-	-	-	-	-	-	-	-	-	-	-	-	-	-	-	-
798	CATGATCTACAGATTGCTCCCACTTC	FE671868.1	3e-06	Medicago sativa partial mRNA for gamma-glutamylcysteinyl synthetase (ECS gene), cultivar Aragon	AM407888	Gamma-glutamylcysteinyl synthetase (Fragment)	Q05FZ9_MEDSA	TC112924	5e-07	0	0	AF041340	0	Medicago truncatula gamma-glutamylcysteine synthetase mRNA, nuclear gene encoding putative plastid protein, complete cds	Glutamate--cysteine ligase, chloroplastic precursor; ( EC=6.3.2.2; AltName: Full=Gamma-glutamylcysteine synthetase; AltName: Full=Gamma-ECS; Short=GCS)	GSH1_MEDTR	no	Correlated protein name
799	CATGGAAATTTAAACTGACTCATCTC	FE671867.1	-	-	-	-	-	-	-	-	-	-	-	-	-	-	-	-
801	CATGAATGTATAATTGCTTAACCAAT	FE671109.1	-	-	-	-	-	-	-	-	-	-	-	-	-	-	-	-
802	CATGTTACCCACCACCAACCGGAAGT	FE671108.1	-	-	-	-	-	-	-	-	-	-	-	-	-	-	-	-
803	CATGGACTCGGAAACATCTATTATCA	FE671107.1	-	-	-	-	-	-	-	-	-	-	-	-	-	-	-	-
804	CATGTAGGAACAAGGTGCAAGTGTAC	FE671105.1	-	-	-	-	-	-	-	-	-	-	-	-	-	-	-	-
805	CATGCAGTGTACTCTTCCACCATTGC	FE671104.1	8e-07	Cicer arietinum mRNA for ribulose 1,5-bisphosphate carboxylase small subunit	AJ131050	Ribulose 1,5-bisphosphate carboxylase small subunit precursor; ( EC=4	Q9ZP07_CICAR	-	-	-	-	-	-	-	-	-	-	-
806	CATGATATCAACTCACACCTTAACCA	FE671103.1	-	-	-	-	-	-	-	-	-	-	-	-	-	-	-	-
807	CATGATTAAAATGGTCACGTGGATGA	FE671102.1	-	-	-	-	-	-	-	-	-	-	-	-	-	-	-	-
808	CATGATAGGAAAGTTCAGTCAGAGTC	FE671100.1	-	-	-	-	-	-	-	-	-	-	-	-	-	-	-	-
809	CATGATATATGTCTGTTGGATACGAG	FE671099.1	-	-	-	-	-	-	-	-	-	-	-	-	-	-	-	-
810	CATGTTCGTTCTCGGTGGTATTGGGA	FE671098.1	-	-	-	-	-	-	-	-	-	-	-	-	-	-	-	-
811	CATGGAAGACCACTGCTTTCTGTCGC	FE672345.1	-	-	-	-	-	-	-	-	-	-	-	-	-	-	-	-
812	CATGACACCCCACAAACCTTCACTTG	FE672344.1	-	-	-	-	-	-	-	-	-	-	-	-	-	-	-	-
814	CATGTGCTTCTTATTATATGTGACTC	FE672342.1	-	-	-	-	-	-	-	-	-	-	-	-	-	-	-	-
815	CATGTCCTCTTATTGAAATTTGCCAC	FE672341.1	-	-	-	-	-	-	-	-	-	-	-	-	-	-	-	-
816	CATGAAGCAATAACAAGCCAAAAAAC	FE672340.1	-	-	-	-	-	-	-	-	-	-	-	-	-	-	-	-
817	CATGCTTCACATAATCCAGATCGCCA	FE672339.1	-	-	-	-	-	-	-	-	-	-	-	-	-	-	-	-
818	CATGTGAAATGGGTGCATAAGAATAT	FE672338.1	8e-07	-	-	-	-	-	-	-	-	-	-	-	-	-	-	-
819	CATGTTGATCTGACCGGACTTTATGG	FE672337.1	-	-	-	-	-	-	-	-	-	-	-	-	-	-	-	-
820	CATGGAATTGGCCACCANATTAGCCT	FE672336.1	-	-	-	-	-	-	-	-	-	-	-	-	-	-	-	-
821	CATGGTGTTCCCGTTTTTCTTCTTTC	FE672335.1	-	-	-	-	-	-	-	-	-	-	-	-	-	-	-	-
822	CATGGCTGCATTAGCGGGAGCAAATT	FE672334.1	-	-	-	-	-	-	-	-	-	-	-	-	-	-	-	-
824	CATGGAGCAAGACAACTTGATTATGT	FE672331.1	-	-	-	-	-	-	-	-	-	-	-	-	-	-	-	-
825	CATGCCTACAACCAAAGGAGAGAGTA	FE672330.1	-	-	-	-	-	-	-	-	-	-	-	-	-	-	-	-
827	CATGACTTGGAGGGCTCTCAAGCACT	FE672328.1	-	-	-	-	-	-	-	-	-	-	-	-	-	-	-	-
829	CATGGGCTTTAGTTTGTTTGATTAGG	FE672326.1	-	-	-	-	-	-	-	-	-	-	-	-	-	-	-	-
832	CATGGGCCCTTGTACTCTGGGTTAGC	FE672322.1	-	-	-	-	-	-	-	-	-	-	-	-	-	-	-	-
833	CATGTGCTTTACGGTTCGTTCCAAGA	FE672321.1	-	-	-	-	-	-	-	-	-	-	-	-	-	-	-	-
834	CATGTCACCTTAGTTCATCGATCTAT	FE672320.1	-	-	-	-	-	-	-	-	-	-	-	-	-	-	-	-
836	CATGATTTCAAATTTGGAAAATTTTC	FE672318.1	-	-	-	-	-	-	-	-	-	-	-	-	-	-	-	-
837	CATGAAGGAGGAGCTGAATGCCCAGA	FE672316.1	-	-	-	-	-	-	-	-	-	-	-	-	-	-	-	-
839	CATGAGGACGACTTAGTGATAGAGCT	FE672314.1	-	-	-	-	-	-	-	-	-	-	-	-	-	-	-	-
844	CATGACGGTGCCGTTTTTCACAAACA	FE672304.1	8e-07	Cicer arietinum mRNA for Trans-Cinnamate 4-Monooxygenase	AJ007449	Trans-cinnamate 4-monooxygenase; ( EC=1	TCMO_CICAR	-	-	-	-	-	-	-	-	-	-	-
845	CATGTGACCTATCGAACCTGTCACCT	FE672303.1	-	-	-	-	-	-	-	-	-	-	-	-	-	-	-	-
846	CATGGATTCAAACTCTTTAGCATCCA	FE672301.1	-	-	-	-	-	-	-	-	-	-	-	-	-	-	-	-
847	CATGAAAGCTGGCAGAATAGTCCAAA	FE672300.1	-	-	-	-	-	-	-	-	-	-	-	-	-	-	-	-
848	CATGTTTTAATAAACTAATGATGACT	FE672299.1	-	-	-	-	-	-	-	-	-	-	-	-	-	-	-	-
850	CATGTTATTTCAATCCTCCTTCCATC	FE672297.1	-	-	-	-	-	-	-	-	-	-	-	-	-	-	-	-
851	CATGCAAGATCTAGAGACTGGAAGAT	FE672294.1	5e-05	Medicago truncatula vacuolar H+-ATPase B subunit mRNA, complete cds	EF153483	Vacuolar H+-ATPase B subunit	A6Y950_MEDTR	TC113684	7e-06	0	0	EF153483	0	Medicago truncatula vacuolar H+-ATPase B subunit mRNA, complete cds	Vacuolar H+-ATPase B subunit	A6Y950_MEDTR	ID direct correlation	-
852	CATGTGCACCCCATCCTCCGTATGTA	FE672293.1	-	-	-	-	-	-	-	-	-	-	-	-	-	-	-	-
853	CATGCTGCTAGTTTGGTGCTTGAAGC	FE672292.1	-	-	-	-	-	-	-	-	-	-	-	-	-	-	-	-
854	CATGCAACCACCGGAGATCGTTGGTG	FE672291.1	-	-	-	-	-	-	-	-	-	-	-	-	-	-	-	-
855	CATGGCAAAGGTCGGATGACAAGATC	FE672287.1	-	-	-	-	-	-	-	-	-	-	-	-	-	-	-	-
856	CATGAAGAATGTCTCTATGCCTAGCC	FE672285.1	-	-	-	-	-	-	-	-	-	-	-	-	-	-	-	-
857	CATGGTTCGAATGCAAGCCGATGGAA	FE672284.1	-	-	-	-	-	TC114462	2e-06	0	0	AB236842	0	Trifolium pratense RNA for putative mitochondrial dicarboxylate carrier protein, complete cds, clone: C331	Putative mitochondrial dicarboxylate carrier protein	Q2PEQ8_TRIPR	-	-
858	CATGGCTTTTGTCATTATCTATCTTT	FE672283.1	-	-	-	-	-	-	-	-	-	-	-	-	-	-	-	-
860	CATGCTCGGAGTTTCGCAAAGATAAC	FE672281.1	-	-	-	-	-	-	-	-	-	-	-	-	-	-	-	-
861	CATGGCTTCCTTAAGCGTCCTAGTGT	FE672280.1	-	-	-	-	-	-	-	-	-	-	-	-	-	-	-	-
864	CATGGCAATTCATTACACTTGGTCAC	FE672276.1	-	-	-	-	-	-	-	-	-	-	-	-	-	-	-	-
865	CATGGTATAATTATTGAATTTTCTGA	FE672274.1	-	-	-	-	-	-	-	-	-	-	-	-	-	-	-	-
868	CATGTGTAACTCCAATCACATCAAAG	FE672271.1	-	-	-	-	-	-	-	-	-	-	-	-	-	-	-	-
869	CATGGTTGCACTGGTGTGGCAGCAAG	FE672270.1	-	-	-	-	-	-	-	-	-	-	-	-	-	-	-	-
870	CATGTTTATCAGAAATCACAAATCCC	FE672268.1	-	-	-	-	-	-	-	-	-	-	-	-	-	-	-	-
871	CATGTTGGCGGAAAATAATAGCAGCT	FE672266.1	-	-	-	-	-	-	-	-	-	-	-	-	-	-	-	-
872	CATGAGAGTAGCCAGCAGGAGGATAA	FE672263.1	-	-	-	-	-	-	-	-	-	-	-	-	-	-	-	-
873	CATGATCTGATCGGATATTTGCAACT	FE672262.1	-	-	-	-	-	-	-	-	-	-	-	-	-	-	-	-
874	CATGGATCGTGAGTTCTTCATTTTTT	FE672261.1	-	-	-	-	-	-	-	-	-	-	-	-	-	-	-	-
875	CATGCCCTGGTTTGCATAACTGATAC	FE672260.1	-	-	-	-	-	-	-	-	-	-	-	-	-	-	-	-
876	CATGGAAGAAGTGTTGCTGTTATGTG	FE672257.1	-	-	-	-	-	-	-	-	-	-	-	-	-	-	-	-
878	CATGCTGTCCCATAATCAATCTACAT	FE672255.1	-	-	-	-	-	-	-	-	-	-	-	-	-	-	-	-
879	CATGGATACACATACTAAGAAATGCA	FE672254.1	-	-	-	-	-	-	-	-	-	-	-	-	-	-	-	-
880	CATGCATCCAAAGCAGTGCAACGTAG	FE672252.1	-	-	-	-	-	-	-	-	-	-	-	-	-	-	-	-
882	CATGTTTGCGAGCTGGACACCCTCTC	FE672728.1	-	-	-	-	-	-	-	-	-	-	-	-	-	-	-	-
883	CATGCAGCTAGAAGGGACAGGGGGAA	FE672727.1	-	-	-	-	-	-	-	-	-	-	-	-	-	-	-	-
884	CATGTATAAGATGAGCCGCCATCACT	FE672725.1	-	-	-	-	-	-	-	-	-	-	-	-	-	-	-	-
885	CATGCTCAAATAATGAATGTCATATG	FE672724.1	-	-	-	-	-	-	-	-	-	-	-	-	-	-	-	-
886	CATGTAACCACGGCAAAGGCTGAAAA	FE672723.1	-	-	-	-	-	-	-	-	-	-	-	-	-	-	-	-
887	CATGTTACCCGGCCTGTACAGGATTA	FE672722.1	-	-	-	-	-	-	-	-	-	-	-	-	-	-	-	-
888	CATGTAGTTATGGGACCAACACAGGT	FE672719.1	-	-	-	-	-	-	-	-	-	-	-	-	-	-	-	-
889	CATGGTTATCCACCTGTTCCGCTAAA	FE672717.1	-	-	-	-	-	-	-	-	-	-	-	-	-	-	-	-
890	CATGCTGTGAACATCGCGTTTGTATC	FE672716.1	-	-	-	-	-	-	-	-	-	-	-	-	-	-	-	-
891	CATGCATAACGTCCATACCAAGGTTA	FE672715.1	-	-	-	-	-	-	-	-	-	-	-	-	-	-	-	-
893	CATGGAATTGGTGGACCCACCCGAAA	FE672711.1	-	-	-	-	-	-	-	-	-	-	-	-	-	-	-	-
894	CATGGATGCATCAAATCTTTACCCTT	FE672710.1	-	-	-	-	-	-	-	-	-	-	-	-	-	-	-	-
895	CATGAATAAATTGGTTATGAATTTCC	FE672707.1	-	-	-	-	-	-	-	-	-	-	-	-	-	-	-	-
896	CATGCGCGCTCTAGCCCTGAGCACTG	FE672706.1	-	-	-	-	-	-	-	-	-	-	-	-	-	-	-	-
897	CATGGCAATTCCGTCGGAAAATAGCC	FE672704.1	-	-	-	-	-	-	-	-	-	-	-	-	-	-	-	-
898	CATGCCAGAATTTCTTGTTCTGTTGC	FE672703.1	-	-	-	-	-	-	-	-	-	-	-	-	-	-	-	-
899	CATGGCACTTAAGGCTGCTTCTGGTT	FE672702.1	-	-	-	-	-	-	-	-	-	-	-	-	-	-	-	-
900	CATGGCTACTATTACATCCATCAAGG	FE672701.1	-	-	-	-	-	-	-	-	-	-	-	-	-	-	-	-
901	CATGATCGAATGTATAGGATAGGTGG	FE672697.1	-	-	-	-	-	-	-	-	-	-	-	-	-	-	-	-
902	CATGATACTCCTCTCAGCTCTTGAAA	FE672691.1	-	-	-	-	-	-	-	-	-	-	-	-	-	-	-	-
903	CATGATAGGAACAGCAGACATCGAAA	FE672689.1	-	-	-	-	-	-	-	-	-	-	-	-	-	-	-	-
904	CATGGCAAATATTCAAAATATACTGA	FE672687.1	-	-	-	-	-	-	-	-	-	-	-	-	-	-	-	-
905	CATGCTGTGTCGTGTTGCACCGTGTC	FE672686.1	-	-	-	-	-	-	-	-	-	-	-	-	-	-	-	-
906	CATGAGGCCAAAAGGGGTGTTTCAGT	FE672685.1	-	-	-	-	-	-	-	-	-	-	-	-	-	-	-	-
907	CATGGCATCACTACTTCTTGCATCAC	FE672684.1	-	-	-	-	-	-	-	-	-	-	-	-	-	-	-	-
908	CATGGCCGCGATTTCTAGGCGCGTGC	FE672683.1	-	-	-	-	-	-	-	-	-	-	-	-	-	-	-	-
909	CATGACAGAAGCTTTGGTTTGAGGAA	FE672682.1	8e-07	Cicer arietinum mRNA for cationic peroxidase	AJ271660	Cationic peroxidase; ( EC=1	Q9FT05_CICAR	TC114195	7e-06	0	0	AJ271660	0	Cicer arietinum mRNA for cationic peroxidase	Cationic peroxidase; ( EC=1.11.1.7)	Q9FT05_CICAR	ID direct correlation	-
910	CATGTCAGTATTACATCTTAGATTGT	FE672680.1	-	-	-	-	-	-	-	-	-	-	-	-	-	-	-	-
911	CATGCTAGTACCAGTAATATTCTTAG	FE672679.1	-	-	-	-	-	-	-	-	-	-	-	-	-	-	-	-
912	CATGAGATACAAACAAGCCTAGGAAA	FE672677.1	-	-	-	-	-	-	-	-	-	-	-	-	-	-	-	-
913	CATGATTCAGGGGATCCTCGTAATTT	FE672676.1	-	-	-	-	-	TC127338	1e-07	0	0	AJ299066	4e-99	Cicer arietinum partial mRNA for ubiquitin-conjugating enzyme E2 (ORF1), clone CanUBC-2	Ubiquitin-conjugating enzyme E2 (Fragment); ( EC=6.3.2.19)	Q9FSZ3_CICAR	-	-
914	CATGTGATTTACCAATCTAAGTGTAT	FE672675.1	-	-	-	-	-	-	-	-	-	-	-	-	-	-	-	-
915	CATGGTCGTAAAGAGTCACCACTTGA	FE672674.1	-	-	-	-	-	-	-	-	-	-	-	-	-	-	-	-
916	CATGGGATTCACCTAAAGAACAAATC	FE672673.1	-	-	-	-	-	-	-	-	-	-	-	-	-	-	-	-
917	CATGTTGTATCACGAGGTACAAGAAT	FE672672.1	-	-	-	-	-	-	-	-	-	-	-	-	-	-	-	-
918	CATGACCCAGGTGCTGATGGAAAAAT	FE672671.1	8e-07	Cicer arietinum mRNA for putative universal stress protein (Usp gene)	AJ630657	Putative universal stress protein	Q700A7_CICAR	-	-	-	-	-	-	-	-	-	-	-
919	CATGCCACCAGAAAGAGATTTCACAA	FE672669.1	-	-	-	-	-	-	-	-	-	-	-	-	-	-	-	-
920	CATGAATCCCTCAATGCAAACTCATC	FE672668.1	-	-	-	-	-	-	-	-	-	-	-	-	-	-	-	-
922	CATGATCTTCGCTCTCGTTTATTGTA	FE672665.1	-	-	-	-	-	-	-	-	-	-	-	-	-	-	-	-
923	CATGACAAAACTTCACCCTGAAGATT	FE672664.1	-	-	-	-	-	-	-	-	-	-	-	-	-	-	-	-
924	CATGTATCTTACGCCCTTGTCTTCAA	FE672663.1	-	-	-	-	-	-	-	-	-	-	-	-	-	-	-	-
925	CATGTTCAATTTGCTCGTTCCCAACA	FE672661.1	-	-	-	-	-	-	-	-	-	-	-	-	-	-	-	-
928	CATGAATTCATTTATTTGCATATTCC	FE672658.1	-	-	-	-	-	-	-	-	-	-	-	-	-	-	-	-
930	CATGGTTAACACCTTCTTCCCTTTTC	FE672656.1	-	-	-	-	-	-	-	-	-	-	-	-	-	-	-	-
931	CATGAAAGAGGAAGATATCAGTAAAG	FE672653.1	-	-	-	-	-	-	-	-	-	-	-	-	-	-	-	-
933	CATGCAGAGATGGGGAAACAGGAGGC	FE672651.1	-	-	-	-	-	-	-	-	-	-	-	-	-	-	-	-
935	CATGGAGAAGTGACAGTTTAGCATCT	FE672649.1	-	-	-	-	-	-	-	-	-	-	-	-	-	-	-	-
936	CATGCCGATATTCAGTAGAGGGTCAC	FE672647.1	-	-	-	-	-	-	-	-	-	-	-	-	-	-	-	-
937	CATGGACTGGATGGGCTAAAAAGAAA	FE672645.1	-	-	-	-	-	-	-	-	-	-	-	-	-	-	-	-
938	CATGCTACAATGGGCGCATCTCTTCC	FE672644.1	-	-	-	-	-	-	-	-	-	-	-	-	-	-	-	-
939	CATGGAGATAATTCAAAATCCCAGAC	FE672643.1	-	-	-	-	-	-	-	-	-	-	-	-	-	-	-	-
940	CATGTGATGGATCGAGAAGGTGGAGG	FE672642.1	-	-	-	-	-	-	-	-	-	-	-	-	-	-	-	-
941	CATGAAAGGCAAACCCACCAGATACA	FE672638.1	-	-	-	-	-	-	-	-	-	-	-	-	-	-	-	-
943	CATGGCCATCCCAAAATCGCTTTCTT	FE672635.1	-	-	-	-	-	-	-	-	-	-	-	-	-	-	-	-
944	CATGACACCTCTGTTCCACTGTCAAC	FE672634.1	-	-	-	-	-	-	-	-	-	-	-	-	-	-	-	-
945	CATGTTGTTCAAAACTTTTTGGAAAT	FE673533.1	-	-	-	-	-	-	-	-	-	-	-	-	-	-	-	-
947	CATGAGGATAGACCTGACATAGATGA	FE673531.1	-	-	-	-	-	-	-	-	-	-	-	-	-	-	-	-
949	CATGCTATTCTAAGCACTTACGGGGT	FE673529.1	-	-	-	-	-	-	-	-	-	-	-	-	-	-	-	-
950	CATGAGTTACAAAATGGTGAAGATTG	FE673528.1	-	-	-	-	-	-	-	-	-	-	-	-	-	-	-	-
951	CATGGAATGGTGTAGTGAGCACAATA	FE673526.1	-	-	-	-	-	-	-	-	-	-	-	-	-	-	-	-
952	CATGGGCTTTCGTGCGTAAATATTGC	FE673524.1	-	-	-	-	-	-	-	-	-	-	-	-	-	-	-	-
953	CATGGACCAAAAACCTATGGCCGGTC	FE673523.1	-	-	-	-	-	-	-	-	-	-	-	-	-	-	-	-
954	CATGTGTCTCAATTACTTTTGCACCT	FE673522.1	-	-	-	-	-	-	-	-	-	-	-	-	-	-	-	-
955	CATGAAGATCCTGGTAATATTAGTTA	FE673519.1	-	-	-	-	-	-	-	-	-	-	-	-	-	-	-	-
956	CATGTAATCCTCAAACACAAATTTTG	FE673518.1	8e-07	Medicago truncatula 1-aminocyclopropanecarboxylic acid oxidase mRNA, complete cds	AY062251	1-aminocyclopropanecarboxylic acid oxidase	Q8VZX7_MEDTR	TC113870	1e-07	0	0	AY062251	0	Medicago truncatula 1-aminocyclopropanecarboxylic acid oxidase mRNA, complete cds	1-aminocyclopropanecarboxylic acid oxidase	Q8VZX7_MEDTR	ID direct correlation	-
957	CATGGTTGGACACTTTATGAGATACT	FE673517.1	-	-	-	-	-	-	-	-	-	-	-	-	-	-	-	-
958	CATGTCTACCGCCACAATTCGCCGTC	FE673516.1	-	-	-	-	-	-	-	-	-	-	-	-	-	-	-	-
959	CATGGATCCCGTCATTACACGTGGCA	FE673515.1	-	-	-	-	-	-	-	-	-	-	-	-	-	-	-	-
960	CATGGCTAATCTACCGTTCTTAATTT	FE673514.1	5e-05	Cicer arietinum mRNA for chlorophyll a/b binding protein	AJ131044	Chlorophyll a/b binding protein precursor	Q9ZP08_CICAR	-	-	-	-	-	-	-	-	-	-	-
961	CATGTTCTCGGAGCTCCGGCTCCATT	FE673513.1	-	-	-	-	-	-	-	-	-	-	-	-	-	-	-	-
962	CATGAGCTCATATATGTGGTGAATCT	FE673512.1	-	-	-	-	-	-	-	-	-	-	-	-	-	-	-	-
963	CATGCTCGCTCGCGGTGGCAAAAAAA	FE673510.1	-	-	-	-	-	-	-	-	-	-	-	-	-	-	-	-
964	CATGAGTGAAAAAGAAAAGGATTCAA	FE673507.1	-	-	-	-	-	-	-	-	-	-	-	-	-	-	-	-
965	CATGGGTTAAAGAAAAATCGCCTAAA	FE673506.1	-	-	-	-	-	-	-	-	-	-	-	-	-	-	-	-
966	CATGTTAAAGGTCTTCTTAAAAGCAA	FE673505.1	-	-	-	-	-	-	-	-	-	-	-	-	-	-	-	-
967	CATGGTGTTGTAACCAGGTAACTCCA	FE673503.1	-	-	-	-	-	-	-	-	-	-	-	-	-	-	-	-
968	CATGAATGCCTAAAAGACGTGGCTTT	FE673502.1	5e-05	Medicago truncatula AKIN betagamma mRNA, complete cds	AY247268	AKIN betagamma	Q84PE0_MEDTR	TC112959	7e-06	0	0	AY247268	0	Medicago truncatula AKIN betagamma mRNA, complete cds	AKIN betagamma	Q84PE0_MEDTR	ID direct correlation	-
969	CATGCCACCACCAGTTCCATAAGGTG	FE673501.1	8e-07	Cicer arietinum clone CaHa16 10 kDa photosystem II polypeptide mRNA, partial cds	EF375955	10 kDa photosystem II polypeptide (Fragment)	B0L635_CICAR	-	-	-	-	-	-	-	-	-	-	-
970	CATGTTAACAATGTGAAGTACATTGG	FE673500.1	8e-07	Arachis hypogaea isolate G1 acyl ACP-thioesterase (pFatB) mRNA, complete cds	EF117309	Acyl ACP-thioesterase	A9P5P5_ARAHY	TC128023	1e-07	0	0	EF117307	0	Arachis hypogaea isolate E1 acyl ACP-thioesterase (pFatB) mRNA, complete cds	Acyl ACP-thioesterase	A9P5P3_ARAHY	no	Correlated protein name
971	CATGATGACAAAACAAAACCTCAAAA	FE673499.1	-	-	-	-	-	-	-	-	-	-	-	-	-	-	-	-
972	CATGAGCATTGAACAAAAGCATCGGT	FE673498.1	-	-	-	-	-	-	-	-	-	-	-	-	-	-	-	-
973	CATGTTTTCTTTTCCCATAACACCGC	FE673209.1	-	-	-	-	-	-	-	-	-	-	-	-	-	-	-	-
974	CATGTGATGCATAAACACTATCCACG	FE673208.1	-	-	-	-	-	-	-	-	-	-	-	-	-	-	-	-
975	CATGGTATGGAATAGAACAAGAGTAC	FE673207.1	8e-07	Lotus corniculatus var. japonicus glutamine synthetase PR2 mutant mRNA, complete cds	AY187006	Glutamine synthetase PR2 mutant; ( EC=6	Q5QKQ5_LOTJA	-	-	-	-	-	-	-	-	-	-	-
976	CATGATCACTTCACAAAAATTTATTA	FE673206.1	-	-	-	-	-	-	-	-	-	-	-	-	-	-	-	-
977	CATGGGGAAGACACGTGGAATGGGAG	FE673205.1	-	-	-	-	-	-	-	-	-	-	-	-	-	-	-	-
978	CATGCAATCACTGGATTTGGACAAAT	FE673204.1	-	-	-	-	-	-	-	-	-	-	-	-	-	-	-	-
979	CATGTGCCTCAACACTTTCTCCCTCT	FE673203.1	-	-	-	-	-	-	-	-	-	-	-	-	-	-	-	-
980	CATGGAATCGTACAAATCATCTTGCA	FE673200.1	-	-	-	-	-	-	-	-	-	-	-	-	-	-	-	-
982	CATGAATCTGTTGATCAATTAGTTTA	FE673198.1	-	-	-	-	-	-	-	-	-	-	-	-	-	-	-	-
983	CATGAAATATCAACCCATTAATGTTC	FE673196.1	-	-	-	-	-	-	-	-	-	-	-	-	-	-	-	-
984	CATGTTGATGCCCCTGGCCACGTCTA	FE673193.1	-	-	-	-	-	-	-	-	-	-	-	-	-	-	-	-
985	CATGAGGAGGCATAGGACATCCTCGG	FE673191.1	-	-	-	-	-	-	-	-	-	-	-	-	-	-	-	-
986	CATGTTAACCCCGCCGTCACTTTCGG	FE673189.1	8e-07	T.repens (Huia) mRNA for gamma-Tip-like protein	Z29946	Gamma-TIP-like protein (Fragment)	Q41616_TRIRP	-	-	-	-	-	-	-	-	-	-	-
987	CATGATGAAAGCACGTGAAAGAGAAA	FE673188.1	-	-	-	-	-	-	-	-	-	-	-	-	-	-	-	-
988	CATGATGTGGTTAATCGAGTTGAAGT	FE673187.1	-	-	-	-	-	-	-	-	-	-	-	-	-	-	-	-
990	CATGATCTTCTCCAACTGGGCCTTTG	FE673185.1	-	-	-	-	-	-	-	-	-	-	-	-	-	-	-	-
991	CATGGAGGAGAAGCATAAATCAGCGC	FE673184.1	-	-	-	-	-	-	-	-	-	-	-	-	-	-	-	-
992	CATGGTGGAATCTGGCCAAATATCTG	FE673182.1	-	-	-	-	-	-	-	-	-	-	-	-	-	-	-	-
994	CATGGGAGTGTACAGATGATGAACTC	FE673179.1	-	-	-	-	-	-	-	-	-	-	-	-	-	-	-	-
995	CATGCCAGGGTTCCTAATACACCAAA	FE673178.1	-	-	-	-	-	-	-	-	-	-	-	-	-	-	-	-
996	CATGTCAATGTAATNTTCTCTTACAA	FE673177.1	-	-	-	-	-	-	-	-	-	-	-	-	-	-	-	-
998	CATGTAGTGTGCACTGCTGCTTGCAC	FE673172.1	-	-	-	-	-	-	-	-	-	-	-	-	-	-	-	-
999	CATGTGGAACACCCGATCCGAAAGTG	FE673171.1	-	-	-	-	-	-	-	-	-	-	-	-	-	-	-	-
1000	CATGAATCTTTTTCTCATTGACGAAT	FE673170.1	-	-	-	-	-	-	-	-	-	-	-	-	-	-	-	-
1001	CATGACTTCGCCGGAGCTAATTCTCC	FE673169.1	-	-	-	-	-	-	-	-	-	-	-	-	-	-	-	-
1003	CATGACCAAATGTATGACCCAAGTTC	FE673167.1	-	-	-	-	-	-	-	-	-	-	-	-	-	-	-	-
1004	CATGTTGTTGGTCATCTAAGTGGCAG	FE673166.1	-	-	-	-	-	-	-	-	-	-	-	-	-	-	-	-
1006	CATGACTGTTCTTATGATTACAAAAC	FE673164.1	-	-	-	-	-	-	-	-	-	-	-	-	-	-	-	-
1007	CATGACTCCATCTCCCTCCTCATCAT	FE673162.1	-	-	-	-	-	-	-	-	-	-	-	-	-	-	-	-
1008	CATGGCACGAGAACATTCTTCATCGG	FE673161.1	-	-	-	-	-	-	-	-	-	-	-	-	-	-	-	-
1009	CATGGAGGATATACTGACCCAGTTGA	FE673160.1	-	-	-	-	-	-	-	-	-	-	-	-	-	-	-	-
1010	CATGTACCTGCGAGCAGAACGAAAAA	FE673159.1	-	-	-	-	-	-	-	-	-	-	-	-	-	-	-	-
1011	CATGTCTGGGTACATCTTGCAGCCTC	FE673158.1	8e-07	C.arietinum mRNA for class I type 2 metallothionein (clone: CanMT-2)	X95709	Metallothionein-like protein 2; ( Short=MT-2)	MT2_CICAR	-	-	-	-	-	-	-	-	-	-	-
1012	CATGCTGAGAATGGAGTTATGAATGA	FE673156.1	-	-	-	-	-	-	-	-	-	-	-	-	-	-	-	-
1013	CATGGATGAAAGNCAAAGGGCTGTGC	FE673155.1	-	-	-	-	-	-	-	-	-	-	-	-	-	-	-	-
1014	CATGGCTTTTGCGGGCAACAAATGTG	FE673152.1	-	-	-	-	-	-	-	-	-	-	-	-	-	-	-	-
1015	CATGGCCAATCGCGCTCAACTTGAAA	FE673150.1	-	-	-	-	-	-	-	-	-	-	-	-	-	-	-	-
1016	CATGCTTTATTTGGACTCACCCGCTG	FE673149.1	-	-	-	-	-	-	-	-	-	-	-	-	-	-	-	-
1017	CATGTCTATCATATTGATGCTTGTTG	FE673147.1	8e-07	Cicer arietinum mRNA for glucan endo-beta-1,3-glucosidase, acidic isoform	AJ012751	Glucan endo-1,3-beta-d-glucosidase precursor; ( EC=3	Q9ZP12_CICAR	-	-	-	-	-	-	-	-	-	-	-
1018	CATGCTGATCTTCAATCATCAAGACA	FE673146.1	-	-	-	-	-	-	-	-	-	-	-	-	-	-	-	-
1019	CATGTCTAAAGTAATGTAATGTAGCT	FE673144.1	-	-	-	-	-	-	-	-	-	-	-	-	-	-	-	-
1020	CATGTTCTGCCCAGCAGGAAGGTAAG	FE673142.1	-	-	-	-	-	-	-	-	-	-	-	-	-	-	-	-
1022	CATGGCTGGCTACATACAAGTATAGC	FE673139.1	8e-07	Cercis chinensis NADH dehydrogenase subunit 1 (NADH1) gene, partial sequence; mitochondrial	DQ110265	-	-	-	-	-	-	-	-	-	-	-	-	-
1023	CATGTAGTAGTTCAGAATGATTGTTA	FE673138.1	-	-	-	-	-	-	-	-	-	-	-	-	-	-	-	-
1025	CATGCTCATCCGTTAATAACTGAATA	FE673136.1	-	-	-	-	-	-	-	-	-	-	-	-	-	-	-	-
1026	CATGCGTGTTGCTTCCAAACAATCTT	FE673134.1	-	-	-	-	-	-	-	-	-	-	-	-	-	-	-	-
1027	CATGTCAAAAGTCAACCATAAGGCTT	FE673131.1	-	-	-	-	-	-	-	-	-	-	-	-	-	-	-	-
1028	CATGCTAATCTGCTGAGCAAAAATAA	FE673130.1	-	-	-	-	-	-	-	-	-	-	-	-	-	-	-	-
1029	CATGGAGTGATGATGATGAGTCATCA	FE673129.1	-	-	-	-	-	-	-	-	-	-	-	-	-	-	-	-
1030	CATGTCTTACTGCGATCACAACCAAA	FE673128.1	-	-	-	-	-	-	-	-	-	-	-	-	-	-	-	-
1031	CATGGATGAAGAATTCTGCACCATTG	FE673127.1	-	-	-	-	-	TC128181	2e-06	0	0	AF002698	0	Pisum sativum putative NADPH-cytochrome P450 reductase (PSC450R1) mRNA, complete cds	Putative NADPH-cytochrome P450 reductase	O04434_PEA	-	-
1032	CATGATCTTTACTCTAGTCTTCGTTA	FE673126.1	-	-	-	-	-	-	-	-	-	-	-	-	-	-	-	-
1033	CATGATTTATTATACCTTGCCAAGAT	FE673125.1	-	-	-	-	-	-	-	-	-	-	-	-	-	-	-	-
1034	CATGATGGTTGCTGCATCTGCTAGCA	FE673124.1	-	-	-	-	-	-	-	-	-	-	-	-	-	-	-	-
1035	CATGACTCTTTCTTTTCGGTCCACAA	FE673123.1	-	-	-	-	-	-	-	-	-	-	-	-	-	-	-	-
1038	CATGGCTAATCTACCGTTCTTAAGTT	FE673117.1	8e-07	Cicer arietinum mRNA for chlorophyll a/b binding protein	AJ131044	Chlorophyll a/b binding protein precursor	Q9ZP08_CICAR	-	-	-	-	-	-	-	-	-	-	-
1039	CATGATATATCATTACAGTCAATATC	FE673116.1	-	-	-	-	-	-	-	-	-	-	-	-	-	-	-	-
1041	CATGTCCTAACTAACACTTTGAAGGA	FE671865.1	-	-	-	-	-	TC132599	2e-06	0	0	AB236774	0	Trifolium pratense RNA for putative zinc dependent protease, complete cds, clone: C1597	Putative zinc dependent protease	Q2PEX6_TRIPR	-	-
1042	CATGTGGTCTCAATCCGCCCAACCTC	FE671863.1	-	-	-	-	-	-	-	-	-	-	-	-	-	-	-	-
1043	CATGCACTTCCCTTTCCGGCGATTCA	FE671862.1	-	-	-	-	-	-	-	-	-	-	-	-	-	-	-	-
1044	CATGTCTTTAGGTTCAAAAGCGATTC	FE671860.1	-	-	-	-	-	-	-	-	-	-	-	-	-	-	-	-
1045	CATGAGTGACCCGAGTGGAAATTACG	FE671859.1	-	-	-	-	-	-	-	-	-	-	-	-	-	-	-	-
1046	CATGGGTGTCAAAGGTTTTGTTGAAG	FE671857.1	-	-	-	-	-	TC114462	1e-07	0	0	AB236842	0	Trifolium pratense RNA for putative mitochondrial dicarboxylate carrier protein, complete cds, clone: C331	Putative mitochondrial dicarboxylate carrier protein	Q2PEQ8_TRIPR	-	-
1047	CATGGAATCTTTGGGTTAACGCTGGC	FE671855.1	8e-07	Cicer arietinum L. mRNA for thaumatin-like protein PR-5b, partial	AJ010501	Thaumatin-like protein PR-5b precursor (Fragment)	O81926_CICAR	-	-	-	-	-	-	-	-	-	-	-
1048	CATGAGAACTGCCATTTCTTCCATCA	FE671854.1	-	-	-	-	-	-	-	-	-	-	-	-	-	-	-	-
1050	CATGGTCAATATTCTGATCTTCTAAG	FE671852.1	8e-07	Vicia faba VfPP1c-4 mRNA for catalytic subunit of protein phosphatase 1, complete cds	AB254852	Serine/threonine protein phosphatase; ( EC=3	Q0EAF2_VICFA	TC126255	1e-07	0	0	AJ002485	0	Medicago sativa mRNA for protein phosphatase 1, beta subunit	Serine/threonine protein phosphatase; ( EC=3.1.3.16)	O65844_MEDSA	no	Correlated protein name
1051	CATGGAAAGCAATGGAAGCACTGTAT	FE671851.1	-	-	-	-	-	-	-	-	-	-	-	-	-	-	-	-
1052	CATGAGGCTAGTGAAGGGTTTGGTTT	FE671849.1	-	-	-	-	-	-	-	-	-	-	-	-	-	-	-	-
1053	CATGTTATACAATCAAATATCCTTAC	FE671848.1	-	-	-	-	-	-	-	-	-	-	-	-	-	-	-	-
1054	CATGCTCGTAAAACTGAAGAACGTGA	FE671846.1	-	-	-	-	-	-	-	-	-	-	-	-	-	-	-	-
1055	CATGATATGATTATTTTGGCTGGTGC	FE671845.1	-	-	-	-	-	-	-	-	-	-	-	-	-	-	-	-
1056	CATGAAGTGTAGTTTCCTCACACTGC	FE671844.1	-	-	-	-	-	TC113116	2e-06	0	0	AF169022	0	Glycine max seed maturation protein PM37 (PM37) mRNA, complete cds	Seed maturation protein PM37	Q9SWB5_SOYBN	-	-
1057	CATGAAGTTCTTGTCAAGGGCTACAA	FE671843.1	-	-	-	-	-	-	-	-	-	-	-	-	-	-	-	-
1058	CATGTGACCCTTGCAACTGCAAGTGA	FE671841.1	8e-07	C.arietinum mRNA for metallothionein (clone: CanMT-1)	X95708	Metallothionein-like protein 1; ( Short=MT-1)	MT1_CICAR	-	-	-	-	-	-	-	-	-	-	-
1059	CATGTGGGCAGTCCCTATTGCAATAT	FE671839.1	-	-	-	-	-	-	-	-	-	-	-	-	-	-	-	-
1060	CATGACAACAACAATAGCAACGATAA	FE671838.1	-	-	-	-	-	-	-	-	-	-	-	-	-	-	-	-
1061	CATGTCTGCATCTGCAGCAATCATTG	FE671836.1	-	-	-	-	-	-	-	-	-	-	-	-	-	-	-	-
1062	CATGTTTCTCCTGAATTTCAAGCAGG	FE671835.1	-	-	-	-	-	-	-	-	-	-	-	-	-	-	-	-
1063	CATGGAGGGTTTTCTTCTGTTCAGTT	FE671833.1	-	-	-	-	-	-	-	-	-	-	-	-	-	-	-	-
1064	CATGTTTGGAAGTTTGATTGACTTTT	FE671832.1	-	-	-	-	-	-	-	-	-	-	-	-	-	-	-	-
1065	CATGGATTGTTTTCAAAAGCTAATCA	FE671830.1	-	-	-	-	-	-	-	-	-	-	-	-	-	-	-	-
1066	CATGTCCACCGTGCCCACCATTTCCG	FE671829.1	8e-07	Cicer arietinum mRNA for glycine-rich protein 1	AJ007556	Glycine-rich protein 1 (Fragment)	O81929_CICAR	-	-	-	-	-	-	-	-	-	-	-
1067	CATGGATCATATGCATTCCAGTGGAA	FE671826.1	-	-	-	-	-	-	-	-	-	-	-	-	-	-	-	-
1068	CATGGGAAGGCCAAGATTGCTTATCA	FE671825.1	-	-	-	-	-	-	-	-	-	-	-	-	-	-	-	-
1069	CATGACATCTCTGGACCATACCAAAA	FE671824.1	-	-	-	-	-	-	-	-	-	-	-	-	-	-	-	-
1070	CATGGGTAGTTGTGGATGGAGAACAC	FE671821.1	-	-	-	-	-	-	-	-	-	-	-	-	-	-	-	-
1071	CATGAAGGTCGGAGAAGTTGCAAAAA	FE671818.1	-	-	-	-	-	-	-	-	-	-	-	-	-	-	-	-
1073	CATGGTGGCAATATCTGTTCTGATCC	FE671816.1	-	-	-	-	-	-	-	-	-	-	-	-	-	-	-	-
1074	CATGAGTCTCCGTCGCGGTCGCGGTT	FE671815.1	-	-	-	-	-	-	-	-	-	-	-	-	-	-	-	-
1075	CATGTGTTGAGATAGCTAAGGAAATG	FE671814.1	-	-	-	-	-	-	-	-	-	-	-	-	-	-	-	-
1076	CATGAAAAAAAATGCTTAAAACTCCC	FE671812.1	-	-	-	-	-	-	-	-	-	-	-	-	-	-	-	-
1078	CATGGCCTCTCCAACACTCATAACTC	FE671810.1	-	-	-	-	-	-	-	-	-	-	-	-	-	-	-	-
1079	CATGTGACCCGGAGTTGGTGAACCTA	FE671809.1	-	-	-	-	-	-	-	-	-	-	-	-	-	-	-	-
1080	CATGATGAGTGTTAAAAATAATACAC	FE671808.1	-	-	-	-	-	-	-	-	-	-	-	-	-	-	-	-
1082	CATGTGATGTGAACTTGTGTATGTAT	FE671806.1	-	-	-	-	-	-	-	-	-	-	-	-	-	-	-	-
1083	CATGGAGTATGTGAAGTCTGGGGAGC	FE671804.1	-	-	-	-	-	-	-	-	-	-	-	-	-	-	-	-
1085	CATGATTGAATATATCTTCCACATTA	FE671802.1	-	-	-	-	-	-	-	-	-	-	-	-	-	-	-	-
1086	CATGGCTCCTGGTCCCGTTATTGATG	FE671801.1	-	-	-	-	-	-	-	-	-	-	-	-	-	-	-	-
1087	CATGTCATAATAAAAGACTACTATCA	FE671800.1	-	-	-	-	-	-	-	-	-	-	-	-	-	-	-	-
1088	CATGATGAGCATATTAAACCTATGAA	FE671798.1	-	-	-	-	-	-	-	-	-	-	-	-	-	-	-	-
1090	CATGTCATCTCCAGGCCACATAGAGT	FE671795.1	-	-	-	-	-	-	-	-	-	-	-	-	-	-	-	-
1091	CATGTTGCAGGAGGGAGAAATCACAG	FE671794.1	-	-	-	-	-	-	-	-	-	-	-	-	-	-	-	-
1092	CATGTTACAAGAAAATGAGCAAATGG	FE671792.1	-	-	-	-	-	-	-	-	-	-	-	-	-	-	-	-
1094	CATGACATTCCCAACAAAACTCCCAA	FE671789.1	-	-	-	-	-	-	-	-	-	-	-	-	-	-	-	-
1095	CATGAAAATGCTCCTTTTTCTGTGAC	FE671788.1	-	-	-	-	-	-	-	-	-	-	-	-	-	-	-	-
1096	CATGACTAGGAGAGATTGAAGTTGGT	FE671786.1	-	-	-	-	-	-	-	-	-	-	-	-	-	-	-	-
1097	CATGGGTTATTCTTTGCCCAATTCCA	FE671785.1	-	-	-	-	-	-	-	-	-	-	-	-	-	-	-	-
1098	CATGGAAATGAGTATAAATAGTAATC	FE671784.1	-	-	-	-	-	-	-	-	-	-	-	-	-	-	-	-
1099	CATGCCCTTTCAAGCTGTCCAAAGAC	FE671783.1	8e-07	Pisum sativum short-chain dehydrogenase Tic32 mRNA, complete cds; nuclear gene for chloroplast product	AY488758	Short-chain dehydrogenase Tic32	Q6RVV4_PEA	-	-	-	-	-	-	-	-	-	-	-
1100	CATGTTGACTCGACATCACATCCCAA	FE671782.1	-	-	-	-	-	-	-	-	-	-	-	-	-	-	-	-
1101	CATGAAGATTCGATTCTCGGAAGATT	FE671781.1	-	-	-	-	-	-	-	-	-	-	-	-	-	-	-	-
1102	CATGTAGGGGAGTTTGCGGAGAGCGT	FE671780.1	-	-	-	-	-	-	-	-	-	-	-	-	-	-	-	-
1103	CATGAAGAGTCTCTGAAAGCTTCCAC	FE671779.1	-	-	-	-	-	-	-	-	-	-	-	-	-	-	-	-
1105	CATGGATTCTCAAACCCAAAAACTCC	FE671774.1	-	-	-	-	-	-	-	-	-	-	-	-	-	-	-	-
1107	CATGCATACCAGTTGCTGGTGAAAGG	FE672633.1	-	-	-	-	-	-	-	-	-	-	-	-	-	-	-	-
1108	CATGTAGAAGATGCAGGCCTAATTCC	FE672632.1	-	-	-	-	-	-	-	-	-	-	-	-	-	-	-	-
1109	CATGCTAGCGTCTTTGTTGGTGGCTT	FE672631.1	-	-	-	-	-	TC118533	2e-06	0	0	M55147	2e-45	Pea chloroplast glyceraldehyde-3-phosphate dehydrogenase (Gpb1) gene, complete cds	Glyceraldehyde-3-phosphate dehydrogenase B, chloroplastic precursor; ( EC=1.2.1.13; AltName: Full=NADP-dependent glyceraldehydephosphate dehydrogenase subunit B)	G3PB_PEA	-	-
1111	CATGGAGGACGAAAATTATTCAAAGG	FE672627.1	-	-	-	-	-	-	-	-	-	-	-	-	-	-	-	-
1112	CATGGCAACAAAAACAAAAATCTTGT	FE672626.1	-	-	-	-	-	-	-	-	-	-	-	-	-	-	-	-
1113	CATGACAATTCCAAGTTTTAAAACAT	FE672625.1	-	-	-	-	-	-	-	-	-	-	-	-	-	-	-	-
1114	CATGTTATTGCTGATTCTGCCATTGG	FE672624.1	8e-07	Cicer arietinum mRNA for lipid transfer protein	AJ002958	Non-specific lipid-transfer protein precursor; ( Short=LTP)	NLTP_CICAR	-	-	-	-	-	-	-	-	-	-	-
1116	CATGCCAATTATCCACTCTTTACTCA	FE672621.1	-	-	-	-	-	-	-	-	-	-	-	-	-	-	-	-
1117	CATGTACTACGATGCTGGTGCACGTC	FE672619.1	-	-	-	-	-	-	-	-	-	-	-	-	-	-	-	-
1118	CATGAAAAGGATCTCGAACTTCATTT	FE672618.1	8e-07	Cicer arietinum mRNA for lectin-like protein	AJ271666	Lectin-like protein	Q9M444_CICAR	-	-	-	-	-	-	-	-	-	-	-
1119	CATGCGTCGTAGAGGAAAAAAACCAA	FE672617.1	-	-	-	-	-	-	-	-	-	-	-	-	-	-	-	-
1120	CATGTCTACAAGAACTCACAACAACC	FE672614.1	-	-	-	-	-	-	-	-	-	-	-	-	-	-	-	-
1122	CATGGCCCATTCCATTTATAGCACGG	FE672611.1	-	-	-	-	-	-	-	-	-	-	-	-	-	-	-	-
1123	CATGATAATCCTCTCAGCTCTTGAAA	FE672610.1	8e-07	Pisum sativum mRNA for precursor for 33-kDa protein of photosystem II, complete cds	D13297	Oxygen-evolving enhancer protein 1, chloroplastic precursor; ( Short=OEE1; AltName: Full=33 kDa subunit of oxygen evolving system of photosystem II; AltName: Full=OEC 33 kDa subunit; AltName: Full=33 kDa thylakoid membrane protein)	PSBO_PEA	-	-	-	-	-	-	-	-	-	-	-
1124	CATGGAGCATCTAATTCGTGTTATCG	FE672608.1	-	-	-	-	-	-	-	-	-	-	-	-	-	-	-	-
1127	CATGCTAATTGTTTCCAAAATATCTT	FE672605.1	-	-	-	-	-	-	-	-	-	-	-	-	-	-	-	-
1128	CATGCATTCTTACCAGGGCTCCATTG	FE672602.1	-	-	-	-	-	-	-	-	-	-	-	-	-	-	-	-
1129	CATGCGCTCAGCAACAGTTCACTATT	FE672601.1	-	-	-	-	-	-	-	-	-	-	-	-	-	-	-	-
1130	CATGGAGATAATTCAAAATCCCACGC	FE672599.1	-	-	-	-	-	-	-	-	-	-	-	-	-	-	-	-
1131	CATGGGGATTGGACATCCCCGCCGGA	FE672597.1	8e-07	Cicer arietinum L. mRNA for thaumatin-like protein PR-5a	AJ010502	Thaumatin-like protein PR-5a precursor	O81927_CICAR	-	-	-	-	-	-	-	-	-	-	-
1134	CATGGCAGACGATTCCATCGTCGCAG	FE672592.1	-	-	-	-	-	-	-	-	-	-	-	-	-	-	-	-
1135	CATGACTCACTTCGATAATCACCAAC	FE672589.1	-	-	-	-	-	-	-	-	-	-	-	-	-	-	-	-
1138	CATGGAGTTGATCNAACCACAACAGA	FE672584.1	5e-05	Cicer pinnatifidum dehydrin 1 mRNA, complete cds	AY170010	Dehydrin 1	Q8GUS4_9FABA	-	-	-	-	-	-	-	-	-	-	-
1139	CATGAGCGTCATCTCTACCAGAACTA	FE672583.1	-	-	-	-	-	-	-	-	-	-	-	-	-	-	-	-
1141	CATGACCAAAGCCGCTACGAAAACGA	FE672581.1	-	-	-	-	-	-	-	-	-	-	-	-	-	-	-	-
1142	CATGTACATTTCATTTAAACGCCGTG	FE672579.1	-	-	-	-	-	-	-	-	-	-	-	-	-	-	-	-
1144	CATGCGAATGTATCCAGAGCGTAGGC	FE672574.1	-	-	-	-	-	-	-	-	-	-	-	-	-	-	-	-
1145	CATGCTCGAAGGAAAGATGTATCGTC	FE672572.1	-	-	-	-	-	-	-	-	-	-	-	-	-	-	-	-
1146	CATGTCGAATGAGGCCGAAAACTTCT	FE672571.1	-	-	-	-	-	-	-	-	-	-	-	-	-	-	-	-
1147	CATGCCAGACCTTCCGCTACTTCTTC	FE672567.1	-	-	-	-	-	-	-	-	-	-	-	-	-	-	-	-
1148	CATGTGTGAGGGTATTCTCGAGCTCC	FE672566.1	-	-	-	-	-	-	-	-	-	-	-	-	-	-	-	-
1149	CATGTGATGACCAACCTTGGTGAGAA	FE672564.1	8e-07	Cicer arietinum calmodulin (CaM1) mRNA, complete cds	EF413914	Calmodulin	A3RI65_CICAR	-	-	-	-	-	-	-	-	-	-	-
1150	CATGTTGCACGACAAGACCTGAGAAA	FE672560.1	-	-	-	-	-	-	-	-	-	-	-	-	-	-	-	-
1151	CATGAGTGATGTTTTGTTAGGATATA	FE672559.1	-	-	-	-	-	-	-	-	-	-	-	-	-	-	-	-
1152	CATGGCTAATCTACCGTTCTTAAGTA	FE672558.1	3e-06	Cicer arietinum mRNA for chlorophyll a/b binding protein	AJ131044	Chlorophyll a/b binding protein precursor	Q9ZP08_CICAR	-	-	-	-	-	-	-	-	-	-	-
1153	CATGGTAATTTAGTTGCTATGGATAT	FE672556.1	-	-	-	-	-	-	-	-	-	-	-	-	-	-	-	-
1154	CATGATTGCTTTTTAGTGATTAGCTT	FE672555.1	-	-	-	-	-	-	-	-	-	-	-	-	-	-	-	-
1155	CATGGTTAGCTCACAGCTGCAACTAC	FE672554.1	-	-	-	-	-	-	-	-	-	-	-	-	-	-	-	-
1156	CATGATGAACAACCCTCTTGTGCAAT	FE672553.1	-	-	-	-	-	-	-	-	-	-	-	-	-	-	-	-
1157	CATGTGCTCAAGAAGAAGAAAAATAT	FE672551.1	-	-	-	-	-	-	-	-	-	-	-	-	-	-	-	-
1158	CATGGCAGTAGAACTGATGACAACAG	FE672548.1	-	-	-	-	-	-	-	-	-	-	-	-	-	-	-	-
1159	CATGGAAGTCCTCTCATACCTCACAC	FE672544.1	-	-	-	-	-	-	-	-	-	-	-	-	-	-	-	-
1160	CATGCTTTCGGCGACTATGACTATGG	FE672542.1	-	-	-	-	-	-	-	-	-	-	-	-	-	-	-	-
1161	CATGTGTCGCGGCGGAAGAATGTTCG	FE672541.1	-	-	-	-	-	-	-	-	-	-	-	-	-	-	-	-
1162	CATGAGCAAAATAGAAATGATTTTTT	FE672540.1	-	-	-	-	-	-	-	-	-	-	-	-	-	-	-	-
1163	CATGATTACACAAGCTTTAGAGTTGA	FE672539.1	-	-	-	-	-	-	-	-	-	-	-	-	-	-	-	-
1164	CATGTAGAAGTCGGACTCGGGAACCA	FE672538.1	-	-	-	-	-	-	-	-	-	-	-	-	-	-	-	-
1165	CATGACTCTGATCAACGAACCGAACC	FE671481.1	-	-	-	-	-	-	-	-	-	-	-	-	-	-	-	-
1166	CATGATGAGGACCTATATGATTTAAA	FE671480.1	-	-	-	-	-	-	-	-	-	-	-	-	-	-	-	-
1167	CATGATTCCTTCACTGTCTATCCTTG	FE671479.1	-	-	-	-	-	-	-	-	-	-	-	-	-	-	-	-
1168	CATGCAGTGCCTTCAAGTTAATCCTG	FE671478.1	-	-	-	-	-	-	-	-	-	-	-	-	-	-	-	-
1171	CATGATGGCAAAATTTGTGGTGATGA	FE671475.1	-	-	-	-	-	-	-	-	-	-	-	-	-	-	-	-
1172	CATGAAGAATGCACCAGTTTCAATTG	FE671474.1	-	-	-	-	-	-	-	-	-	-	-	-	-	-	-	-
1174	CATGACCGCCTAGTTCGTAACCTGTG	FE671472.1	-	-	-	-	-	-	-	-	-	-	-	-	-	-	-	-
1175	CATGCTGCTGCTATAAAGCTTTATAT	FE671471.1	-	-	-	-	-	-	-	-	-	-	-	-	-	-	-	-
1176	CATGGTTACTGGTGCAGCTTCAGCCG	FE671470.1	-	-	-	-	-	-	-	-	-	-	-	-	-	-	-	-
1177	CATGTTTGGGTGTATGCTTGTGTTTG	FE671096.1	-	-	-	-	-	-	-	-	-	-	-	-	-	-	-	-
1178	CATGTGACCCGGAGTAGGTGAAGCTA	FE671095.1	-	-	-	-	-	-	-	-	-	-	-	-	-	-	-	-
1179	CATGTATCCATCTTATTAATAAACCA	FE671094.1	-	-	-	-	-	-	-	-	-	-	-	-	-	-	-	-
1180	CATGGATATATTTGATGTGGATCATT	FE671093.1	-	-	-	-	-	TC119629	7e-06	0	0	U81288	0	Pisum sativum PsRT17-1 mRNA, complete cds	PsRT17-1	P93487_PEA	-	-
1181	CATGGGAACATCAGCCCCAGCAATTC	FE671091.1	-	-	-	-	-	-	-	-	-	-	-	-	-	-	-	-
1182	CATGATCTTCTCCAACGGGGCCTTTG	FE671090.1	-	-	-	-	-	-	-	-	-	-	-	-	-	-	-	-
1184	CATGAGACCCTGGTGATAACAGTAAA	FE671087.1	-	-	-	-	-	-	-	-	-	-	-	-	-	-	-	-
1185	CATGATTGAGTTTTTCCTCATACAAC	FE671086.1	-	-	-	-	-	-	-	-	-	-	-	-	-	-	-	-
1186	CATGTAATTTGCAGCCCATAAACTTG	FE671469.1	-	-	-	-	-	TC121549	1e-07	0	0	Z73938	0	L.japonicus mRNA for small GTP-binding protein, RAB5A	RAB5A	Q40209_LOTJA	-	-
1188	CATGCAATTCTTATCTATCTTGCTTC	FE671466.1	-	-	-	-	-	TC124358	1e-07	0	0	AF243378	2e-179	Glycine max glutathione S-transferase GST 23 mRNA, complete cds	Glutathione S-transferase GST 23; ( EC=2.5.1.18)	Q9FQD5_SOYBN	-	-
1189	CATGGTTTTGTTGCGAAGCCAGAGAC	FE671465.1	-	-	-	-	-	-	-	-	-	-	-	-	-	-	-	-
1191	CATGCTTGCCATTGATTCTAAGTGAA	FE671461.1	8e-07	Cicer arietinum mRNA for lipid transfer protein	AJ002958	Non-specific lipid-transfer protein precursor; ( Short=LTP)	NLTP_CICAR	-	-	-	-	-	-	-	-	-	-	-
1192	CATGAAGATACCACCATATAGCAATG	FE671460.1	-	-	-	-	-	-	-	-	-	-	-	-	-	-	-	-
1193	CATGTTTTTGATATACAACACATAAT	FE671459.1	-	-	-	-	-	-	-	-	-	-	-	-	-	-	-	-
1194	CATGCAATAGAGTTGCCACACATCGA	FE671458.1	-	-	-	-	-	-	-	-	-	-	-	-	-	-	-	-
1195	CATGGAATTATCCTCTGTTAATGGCG	FE671085.1	1e-05	Ammopiptanthus mongolicus betaine aldehyde dehydrogenase mRNA, partial cds	DQ288723	Betaine aldehyde dehydrogenase (Fragment)	Q2I693_9FABA	-	-	-	-	-	-	-	-	-	-	-
1196	CATGTTTATCAGAGTAGCGGTGCATC	FE671083.1	-	-	-	-	-	-	-	-	-	-	-	-	-	-	-	-
1198	CATGTCCATTCTCCACCTATTGAAGC	FE671081.1	-	-	-	-	-	-	-	-	-	-	-	-	-	-	-	-
1200	CATGACCCAAACCCTTTCTCCCATCT	FE671079.1	-	-	-	-	-	-	-	-	-	-	-	-	-	-	-	-
1201	CATGTGCATATCCACCTTGTGCATAG	FE671077.1	-	-	-	-	-	-	-	-	-	-	-	-	-	-	-	-
1203	CATGGAGAAGGTTTCCGCCAACGCTG	FE671075.1	-	-	-	-	-	-	-	-	-	-	-	-	-	-	-	-
1204	CATGTTTTTGACAAACCACTCCCCAA	FE671074.1	-	-	-	-	-	-	-	-	-	-	-	-	-	-	-	-
1205	CATGAATTTGTAAAGTATGGATTGGC	FE671457.1	-	-	-	-	-	-	-	-	-	-	-	-	-	-	-	-
1206	CATGTTGCTCTCCTTTGTGCTCTCCA	FE671456.1	-	-	-	-	-	-	-	-	-	-	-	-	-	-	-	-
1207	CATGAACCAGAACAAGCCTGAAAGCA	FE671455.1	-	-	-	-	-	-	-	-	-	-	-	-	-	-	-	-
1209	CATGAACAGCCGACTCAACCAGTAAT	FE671452.1	-	-	-	-	-	-	-	-	-	-	-	-	-	-	-	-
1211	CATGGTGTTGTCACTGAAGAGTGTGA	FE671450.1	8e-07	Pisum sativum partial mRNA for putative cathepsin B-like protease (cat1 gene) clone PsCat1	AJ251536	Putative cathepsin B-like protease (Fragment)	Q9SC35_PEA	TC113848	1e-07	0	0	AJ251536	0	Pisum sativum partial mRNA for putative cathepsin B-like protease (cat1 gene) clone PsCat1	Putative cathepsin B-like protease (Fragment)	Q9SC35_PEA	ID direct correlation	-
1213	CATGTGATCCATATACACGCACTAAT	FE671072.1	-	-	-	-	-	-	-	-	-	-	-	-	-	-	-	-
1214	CATGTTTTTGAATGGTTTCTGCAAGA	FE671071.1	-	-	-	-	-	-	-	-	-	-	-	-	-	-	-	-
1215	CATGAGGTTATTGACAAGCTTCATAA	FE671070.1	-	-	-	-	-	-	-	-	-	-	-	-	-	-	-	-
1216	CATGCTGTACAGTGTAAAGTTTTAAA	FE671067.1	-	-	-	-	-	-	-	-	-	-	-	-	-	-	-	-
1217	CATGGTGCAACTTTTTACAAGATGGG	FE671066.1	-	-	-	-	-	-	-	-	-	-	-	-	-	-	-	-
1219	CATGACAAAGTTTCACTTGTATGGAT	FE671063.1	-	-	-	-	-	-	-	-	-	-	-	-	-	-	-	-
1220	CATGGAATATCTTCCAGCTCTTGGCA	FE671062.1	-	-	-	-	-	-	-	-	-	-	-	-	-	-	-	-
1221	CATGAGTATTAAACAAGAATAATAAT	FE671445.1	-	-	-	-	-	-	-	-	-	-	-	-	-	-	-	-
1222	CATGTTCTCCTTTCTCAGCCTCTCGT	FE671444.1	-	-	-	-	-	-	-	-	-	-	-	-	-	-	-	-
1225	CATGGCCTCCCAAGCAAGCCTCCTCC	FE671440.1	-	-	-	-	-	TC114325	1e-07	0	0	DQ887086	1e-132	Arachis hypogaea ubiquitin-conjugating enzyme mRNA, complete cds	Ubiquitin carrier protein; ( EC=6.3.2.-)	Q06H22_ARAHY	-	-
1227	CATGGCTCACCAGTCGTTCAGATGGC	FE671437.1	-	-	-	-	-	-	-	-	-	-	-	-	-	-	-	-
1228	CATGTCAAATTTTGCAAACAGGGATA	FE671436.1	-	-	-	-	-	-	-	-	-	-	-	-	-	-	-	-
1229	CATGAATCCTACCAAGGCTATTTCAA	FE671435.1	-	-	-	-	-	-	-	-	-	-	-	-	-	-	-	-
1230	CATGGATTCCACGTGTCTTGTATCGA	FE671059.1	-	-	-	-	-	-	-	-	-	-	-	-	-	-	-	-
1231	CATGCTCGCTCGCGGTGGCAAAGAAA	FE671058.1	-	-	-	-	-	-	-	-	-	-	-	-	-	-	-	-
1232	CATGATGATGAGCCTCCTCAGCCTAT	FE671057.1	-	-	-	-	-	-	-	-	-	-	-	-	-	-	-	-
1233	CATGCTTTGGAATGCTGTGATCTTTG	FE671056.1	-	-	-	-	-	-	-	-	-	-	-	-	-	-	-	-
1234	CATGAGCAAATTCGATATCAAATATT	FE671055.1	-	-	-	-	-	-	-	-	-	-	-	-	-	-	-	-
1235	CATGCCTAATTCTCCGAAAAATTTTA	FE671054.1	-	-	-	-	-	-	-	-	-	-	-	-	-	-	-	-
1236	CATGGGTCGATGGCGATGTTGTTGGA	FE671053.1	-	-	-	-	-	-	-	-	-	-	-	-	-	-	-	-
1237	CATGCTTTTACAAGAGGGGGACATTG	FE671052.1	-	-	-	-	-	-	-	-	-	-	-	-	-	-	-	-
1238	CATGCACAGGGCTGTGGCTGGCTTTA	FE671051.1	-	-	-	-	-	-	-	-	-	-	-	-	-	-	-	-
1239	CATGCCACTAGTATTATCAATCCCAG	FE671050.1	-	-	-	-	-	-	-	-	-	-	-	-	-	-	-	-
1241	CATGAAGTTGGGGATCACACGATGGA	FE671431.1	8e-07	Cicer arietinum partial mRNA for cyclophilin-type peptidyl-prolyl cis-trans isomerase (ppi gene)	AJ609278	Cyclophilin-type peptidyl-prolyl cis-trans isomerase (Fragment); ( EC=5	Q708X2_CICAR	-	-	-	-	-	-	-	-	-	-	-
1242	CATGATTCTTCGTCCGTTTTCTGTCA	FE671430.1	-	-	-	-	-	-	-	-	-	-	-	-	-	-	-	-
1243	CATGGGGTCCAGCTTGTTCACGGCCG	FE671428.1	-	-	-	-	-	-	-	-	-	-	-	-	-	-	-	-
1244	CATGCTTTATCAGACAAGAAGGTTGG	FE671426.1	-	-	-	-	-	-	-	-	-	-	-	-	-	-	-	-
1246	CATGGACCTACAAAGATATCTATTGT	FE671423.1	-	-	-	-	-	-	-	-	-	-	-	-	-	-	-	-
1247	CATGGAAAGAAGAAACACCATTTCTT	FE671422.1	-	-	-	-	-	TC115094	1e-07	0	0	AY382827	3e-41	Glycine max abscisic stress ripening-like protein mRNA, complete cds	Abscisic stress ripening-like protein	Q2TUW1_SOYBN	-	-
1248	CATGTATAATCAATACAGGTTCTTCT	FE671049.1	-	-	-	-	-	-	-	-	-	-	-	-	-	-	-	-
1249	CATGAATCAAAAATCAAAATGTCAAA	FE671048.1	-	-	-	-	-	-	-	-	-	-	-	-	-	-	-	-
1250	CATGAATTGCATAAGCTTGAACCAAC	FE671047.1	-	-	-	-	-	-	-	-	-	-	-	-	-	-	-	-
1251	CATGTGTAAACGGAACGTCGCCGTTT	FE671046.1	-	-	-	-	-	-	-	-	-	-	-	-	-	-	-	-
1252	CATGGTCTTTTAAGCCTAAGGGGGAA	FE671045.1	5e-05	Trifolium repens auxin response factor mRNA, partial cds	AY646093	Auxin response factor (Fragment)	Q6DTY6_TRIRP	TC125284	1e-07	0	0	AY646093	7e-90	Trifolium repens auxin response factor mRNA, partial cds	Auxin response factor (Fragment)	Q6DTY6_TRIRP	ID direct correlation	-
1253	CATGATGCGATCGAAGGTTTCAACGG	FE671044.1	-	-	-	-	-	-	-	-	-	-	-	-	-	-	-	-
1254	CATGTGCGGACAAAAACCATCGCGTC	FE671043.1	-	-	-	-	-	-	-	-	-	-	-	-	-	-	-	-
1255	CATGTGTATATTTAAGCTTTGACTCT	FE671039.1	-	-	-	-	-	BF004346	1e-07	0	0	AF118784	8e-56	Glycine max ribonucleotide reductase large subunit A mRNA, complete cds	Ribonucleoside-diphosphate reductase; ( EC=1.17.4.1)	Q8GZU9_SOYBN	-	-
1256	CATGAAGAATAAGTGCCAAATCCTTG	FE671421.1	8e-07	Pisum sativum NADP-dependent isocitrate dehydrogenase I gene, complete cds	AY730588	NADP-dependent isocitrate dehydrogenase (NADP-dependent isocitrate dehydrogenase I); ( EC=1	Q6R6M7_PEA	TC127035	1e-07	0	0	M93672	0	Medicago sativa isocitrate dehydrogenase mRNA, 3' end cds	Isocitrate dehydrogenase	IDHP_MEDSA	no	Correlated protein name
1257	CATGAGCATCAACTTTTTTGAAGTCA	FE671419.1	-	-	-	-	-	TC115837	1e-07	0	0	AJ831475	0	Pisum sativum mRNA for putative His-Asp phosphotransfer protein (hpt gene)	Putative His-Asp phosphotransfer protein	Q659S8_PEA	-	-
1258	CATGATATTTAAAAGCATATTATACC	FE671418.1	-	-	-	-	-	-	-	-	-	-	-	-	-	-	-	-
1260	CATGCGTCACAATGGAAATTACAATC	FE671415.1	-	-	-	-	-	-	-	-	-	-	-	-	-	-	-	-
1262	CATGATACTACGGGTTACTCTCGTTA	FE671413.1	-	-	-	-	-	-	-	-	-	-	-	-	-	-	-	-
1263	CATGATTATGTATACTTGTATATTAT	FE671412.1	-	-	-	-	-	-	-	-	-	-	-	-	-	-	-	-
1264	CATGGCACTCTAATACGCTGATATAA	FE671411.1	-	-	-	-	-	-	-	-	-	-	-	-	-	-	-	-
1265	CATGTTAAAGGAAGGGAATCTTGTGA	FE671037.1	-	-	-	-	-	-	-	-	-	-	-	-	-	-	-	-
1267	CATGTTAGGTTCAATATCAAACCCCA	FE671035.1	-	-	-	-	-	-	-	-	-	-	-	-	-	-	-	-
1268	CATGAAGGAGTCAAATCAGTCTTTTA	FE671034.1	-	-	-	-	-	TC129841	1e-07	0	0	AF372517	0	Medicago sativa 16S ribosomal RNA gene, partial sequence; and tRNA-Ile and tRNA-Ala genes, complete sequence; chloroplast genes for chloroplast products	-	-	-	-
1269	CATGTGTGGGCAACCTTGGACCACGC	FE671033.1	-	-	-	-	-	-	-	-	-	-	-	-	-	-	-	-
1270	CATGATAATAACCCTCCTCTCTCCCA	FE671031.1	-	-	-	-	-	-	-	-	-	-	-	-	-	-	-	-
1271	CATGCTATGTCACTGTTAGAGGTGAC	FE671030.1	1e-05	Cicer arietinum mRNA for ribosomal protein RL5 (rl5 gene)	AJ515029	Ribosomal protein RL5	Q8GTE2_CICAR	-	-	-	-	-	-	-	-	-	-	-
1272	CATGAAGCAACGGTCGTCAATTTCTG	FE671029.1	-	-	-	-	-	-	-	-	-	-	-	-	-	-	-	-
1274	CATGTTGAACCAGAGAGGGTTATGAA	FE671027.1	-	-	-	-	-	-	-	-	-	-	-	-	-	-	-	-
1275	CATGGATATAGAAAGAAACAGTCTCA	FE671026.1	-	-	-	-	-	-	-	-	-	-	-	-	-	-	-	-
1278	CATGTCCTCTGGGTGTACTCCTGATT	FE671407.1	-	-	-	-	-	-	-	-	-	-	-	-	-	-	-	-
1279	CATGCAGCACCTGTATGAAAGTCAGT	FE671405.1	8e-07	Arachis hypogaea cultivar JL24 16S ribosomal RNA gene, partial sequence; mitochondrial	EU982414	-	-	TC120792	1e-07	0	0	M16859	0	Soybean 18S ribosomal RNA gene	-	-	-	Uncorrelated annotation
1280	CATGTCTGTTTCCAACAACGATGAGA	FE671404.1	-	-	-	-	-	-	-	-	-	-	-	-	-	-	-	-
1282	CATGCCATATCCATCGGAGGAGGATG	FE671402.1	-	-	-	-	-	-	-	-	-	-	-	-	-	-	-	-
1283	CATGAACCTTAAGCAAGACATTATAG	FE671401.1	-	-	-	-	-	-	-	-	-	-	-	-	-	-	-	-
1285	CATGCACTTTGCTTGGGTCTTGCACC	FE671399.1	-	-	-	-	-	-	-	-	-	-	-	-	-	-	-	-
1286	CATGTGGTGATGTTGTNCTCTAAATG	FE671398.1	5e-05	Medicago truncatula zinc finger protein, GH1 protein, hydroxyproline-rich glycoprotein, and bHLH transcription factor genes, complete cds; LTR-retrotransposon, complete sequence; beta-D-xylosidase, glycine-rich protein, putative protein, ABC transporter, NORK, BRICK1, oligopeptidase A, serine-hydroxymethyltransferase, and MADS-box protein genes, complete cds; tRNA-Ile genes, complete sequence; le…	EU306659	-	-	ES612435	7e-06	1	0	EU306659	0	Medicago truncatula zinc finger protein, GH1 protein, hydroxyproline-rich glycoprotein, and bHLH transcription factor genes, complete cds; LTR-retrotransposon, complete sequence; beta-D-xylosidase, glycine-rich protein, putative protein, ABC transporter, NORK, BRICK1, oligopeptidase A, serine-hydroxymethyltransferase, and MADS-box protein genes, complete cds; tRNA-Ile genes, complete sequence; le…	-	-	-	-
1287	CATGCAAAACCTGTTTGAGACTGTGA	FE671025.1	-	-	-	-	-	-	-	-	-	-	-	-	-	-	-	-
1288	CATGTGACAAACCTTGATCGCCGTGA	FE671024.1	-	-	-	-	-	-	-	-	-	-	-	-	-	-	-	-
1289	CATGAAGTTGGCATTTTAATTGTATT	FE671022.1	-	-	-	-	-	-	-	-	-	-	-	-	-	-	-	-
1290	CATGGTACTAAGTTTTTTCTTTAACT	FE671021.1	-	-	-	-	-	-	-	-	-	-	-	-	-	-	-	-
1292	CATGGACCGTGCTGACGTGGATGAAC	FE671017.1	-	-	-	-	-	-	-	-	-	-	-	-	-	-	-	-
1294	CATGTTTTAACTCGCTTCGAACTGTT	FE671015.1	-	-	-	-	-	-	-	-	-	-	-	-	-	-	-	-
1295	CATGGTGGATGATCTCCAAAATAAAA	FE671014.1	-	-	-	-	-	-	-	-	-	-	-	-	-	-	-	-
1296	CATGTTGAGGCAAAGCATTTCCTTCT	FE671396.1	-	-	-	-	-	-	-	-	-	-	-	-	-	-	-	-
1297	CATGGCTTAATCTTTGAGACAAGCAT	FE671394.1	8e-07	Glycine soja cultivar IT182932 26S ribosomal RNA gene, partial sequence; 26S-18S ribosomal RNA intergenic spacer, complete sequence; and 18S ribosomal RNA gene, partial sequence	EU118311	-	-	AW684012	1e-07	0	0	EF571296	0	Glycyrrhiza uralensis 18S ribosomal RNA, partial sequence	-	-	-	Correlated RNA description
1298	CATGGTTAACGGTGCGGAACTCGTGC	FE671393.1	-	-	-	-	-	-	-	-	-	-	-	-	-	-	-	-
1299	CATGTGTCTACATATAGCAATTTTCT	FE671392.1	-	-	-	-	-	-	-	-	-	-	-	-	-	-	-	-
1300	CATGGAGGAATTTTTTTTCTTTCTAT	FE671391.1	-	-	-	-	-	-	-	-	-	-	-	-	-	-	-	-
1301	CATGAATTAGACCAATTCCTTCAAAG	FE671389.1	-	-	-	-	-	-	-	-	-	-	-	-	-	-	-	-
1302	CATGGAGGGAAGGCCGGCGCACGGTG	FE671388.1	-	-	-	-	-	-	-	-	-	-	-	-	-	-	-	-
1303	CATGAATGCATTTGAAACAACTCTTG	FE671387.1	-	-	-	-	-	-	-	-	-	-	-	-	-	-	-	-
1304	CATGTCTGACTTCAAAGAACAATATA	FE671012.1	-	-	-	-	-	-	-	-	-	-	-	-	-	-	-	-
1305	CATGGCAATTGTCTTGCATCTGACCC	FE671009.1	-	-	-	-	-	-	-	-	-	-	-	-	-	-	-	-
1306	CATGAATCTCAAATTGTGAGGGGGGA	FE671008.1	-	-	-	-	-	-	-	-	-	-	-	-	-	-	-	-
1308	CATGCTGCTCTCCTTTGTGCTCTCCT	FE671004.1	-	-	-	-	-	-	-	-	-	-	-	-	-	-	-	-
1309	CATGGAGATCATTCAGAATCCCACAC	FE673113.1	-	-	-	-	-	-	-	-	-	-	-	-	-	-	-	-
1310	CATGAAATATAATAAGTTTGTTTGAA	FE673111.1	-	-	-	-	-	-	-	-	-	-	-	-	-	-	-	-
1311	CATGGACCAGCTCTCACGCGCACAGA	FE673108.1	-	-	-	-	-	-	-	-	-	-	-	-	-	-	-	-
1312	CATGGGGAAAATGGGCAGCAGAGATT	FE673107.1	-	-	-	-	-	TC113449	5e-07	0	0	AB378636	5e-55	Lotus japonicus LjERF18 mRNA for transcription factor AP2-EREBP, complete cds		B3IX36_LOTJA	-	-
1313	CATGTATTTCTCTACAACATTTGGAA	FE673106.1	-	-	-	-	-	-	-	-	-	-	-	-	-	-	-	-
1314	CATGGGAGATGAAAATAGATTGGAGC	FE673103.1	-	-	-	-	-	-	-	-	-	-	-	-	-	-	-	-
1316	CATGTCTTCAGCAACCGGACCAGCGC	FE672248.1	-	-	-	-	-	-	-	-	-	-	-	-	-	-	-	-
1317	CATGAAAGAAGGAATGAGGACCAGTG	FE672247.1	-	-	-	-	-	-	-	-	-	-	-	-	-	-	-	-
1319	CATGTTGTGTCCTGATTCCCAGTAGC	FE672242.1	-	-	-	-	-	-	-	-	-	-	-	-	-	-	-	-
1320	CATGGCTTATCATATTGGCTGCCTCT	FE672241.1	-	-	-	-	-	-	-	-	-	-	-	-	-	-	-	-
1322	CATGGCAGACATAACACTCACAATCA	FE672238.1	-	-	-	-	-	-	-	-	-	-	-	-	-	-	-	-
1323	CATGCCACGAAAATTATCAGAGGAAA	FE673101.1	-	-	-	-	-	-	-	-	-	-	-	-	-	-	-	-
1324	CATGAGCATCATCGACATTCTAACCC	FE673100.1	-	-	-	-	-	-	-	-	-	-	-	-	-	-	-	-
1325	CATGAAGTAAAGAAAAAACCTGACTT	FE673099.1	-	-	-	-	-	-	-	-	-	-	-	-	-	-	-	-
1326	CATGAATGCCAAATTCTATACCAAAA	FE673097.1	-	-	-	-	-	-	-	-	-	-	-	-	-	-	-	-
1328	CATGCCTTGCACCCATTGCTTTGTGA	FE673095.1	-	-	-	-	-	-	-	-	-	-	-	-	-	-	-	-
1329	CATGCCGTTTCATTGCTCCAATTCTA	FE673092.1	-	-	-	-	-	-	-	-	-	-	-	-	-	-	-	-
1331	CATGTAAGGTTTTGGATTTTAGTGTT	FE672237.1	-	-	-	-	-	-	-	-	-	-	-	-	-	-	-	-
1332	CATGTACTTGGTCTGGTCCGTCTTCA	FE672235.1	8e-07	Cicer arietinum mRNA for hypothetical protein, clone Can137	AJ012681	Putative uncharacterized protein (Fragment)	Q9ZRW4_CICAR	-	-	-	-	-	-	-	-	-	-	-
1333	CATGCTTCATCTCCCTGTATCCACGT	FE672234.1	-	-	-	-	-	-	-	-	-	-	-	-	-	-	-	-
1334	CATGAGACCTTTTTTTTTACTTTGAG	FE672233.1	-	-	-	-	-	-	-	-	-	-	-	-	-	-	-	-
1335	CATGATGCCCTGCTTCGTTTGGTTTT	FE672232.1	-	-	-	-	-	-	-	-	-	-	-	-	-	-	-	-
1337	CATGTGTGTGATCCAGATGAATATAA	FE672230.1	8e-07	Cicer arietinum mRNA for cysteine proteinase	AJ009878	Cysteine proteinase	O81930_CICAR	-	-	-	-	-	-	-	-	-	-	-
1338	CATGCCGCCACCAATAGTTTCACATC	FE672229.1	-	-	-	-	-	-	-	-	-	-	-	-	-	-	-	-
1339	CATGATTACGACGAAAAAAAAAAGAT	FE672227.1	-	-	-	-	-	-	-	-	-	-	-	-	-	-	-	-
1341	CATGGGTTTCAACATAGCAACAGCAT	FE673089.1	-	-	-	-	-	-	-	-	-	-	-	-	-	-	-	-
1342	CATGACCATAGTTACCACCACCATTG	FE673087.1	8e-07	Cicer arietinum mRNA for glycine-rich protein 2, partial	AJ012829	Glycine-rich protein 2 (Fragment)	Q9ZRV2_CICAR	-	-	-	-	-	-	-	-	-	-	-
1344	CATGAGTTTTATACTTTTATTATGAT	FE673085.1	-	-	-	-	-	-	-	-	-	-	-	-	-	-	-	-
1345	CATGCTCACTTTGGGATTCTCCAATC	FE673084.1	-	-	-	-	-	-	-	-	-	-	-	-	-	-	-	-
1346	CATGTTCAACCAAAAACACACGTGGC	FE673083.1	-	-	-	-	-	-	-	-	-	-	-	-	-	-	-	-
1347	CATGCATTCAACTTCCCACTAAAAGG	FE673082.1	-	-	-	-	-	-	-	-	-	-	-	-	-	-	-	-
1349	CATGAGATTGTGTACTTGACTTATTA	FE673078.1	-	-	-	-	-	-	-	-	-	-	-	-	-	-	-	-
1350	CATGTGCCACATTAATACTAAAAAAT	FE672223.1	-	-	-	-	-	-	-	-	-	-	-	-	-	-	-	-
1351	CATGCCGAGGTCTGCGGGTCCCACAT	FE672222.1	-	-	-	-	-	-	-	-	-	-	-	-	-	-	-	-
1352	CATGCTTTTGAATCAATTGCCTTCTG	FE672221.1	-	-	-	-	-	-	-	-	-	-	-	-	-	-	-	-
1353	CATGTTGGTGGAAATGGTTCTGATGA	FE672220.1	-	-	-	-	-	TC121026	1e-07	0	0	EF623860	7e-06	Glycine max cultivar Williams 82 clone 77G7-b, complete sequence	-	-	-	-
1354	CATGTGTAGGTTAATAATGCTGGCTT	FE672218.1	-	-	-	-	-	-	-	-	-	-	-	-	-	-	-	-
1355	CATGAACCGGAATTGCAAACCGGGGA	FE672215.1	-	-	-	-	-	-	-	-	-	-	-	-	-	-	-	-
1357	CATGGCTAATCTCCCGTTCTTAATTT	FE673076.1	-	-	-	-	-	-	-	-	-	-	-	-	-	-	-	-
1358	CATGTCCTACATAGGCCTCCTTATAA	FE673075.1	-	-	-	-	-	-	-	-	-	-	-	-	-	-	-	-
1360	CATGCAAATAACTCCTTCTCTTTAAG	FE673071.1	-	-	-	-	-	-	-	-	-	-	-	-	-	-	-	-
1361	CATGAGTAGCATAGAAAATGTAAATA	FE673070.1	-	-	-	-	-	-	-	-	-	-	-	-	-	-	-	-
1362	CATGGCGAAACTCGCCGACCAAGCCG	FE673067.1	-	-	-	-	-	-	-	-	-	-	-	-	-	-	-	-
1363	CATGCATAAACCACATAAGCATACCG	FE673066.1	-	-	-	-	-	-	-	-	-	-	-	-	-	-	-	-
1365	CATGTAGCACAATAAACACTAGCCTT	FE672212.1	-	-	-	-	-	-	-	-	-	-	-	-	-	-	-	-
1366	CATGCAAATCATAGCTTTGATCCATT	FE672211.1	-	-	-	-	-	-	-	-	-	-	-	-	-	-	-	-
1367	CATGCCTGCTGGAAGGACGATATCAA	FE672210.1	-	-	-	-	-	-	-	-	-	-	-	-	-	-	-	-
1368	CATGAGCTACAAGAAAATTCCTGCTG	FE672208.1	-	-	-	-	-	-	-	-	-	-	-	-	-	-	-	-
1369	CATGACCAATATTATCCCTACCCTGA	FE672207.1	-	-	-	-	-	-	-	-	-	-	-	-	-	-	-	-
1370	CATGATACCAGGGACACAAGGGGGAA	FE672206.1	-	-	-	-	-	-	-	-	-	-	-	-	-	-	-	-
1372	CATGACAAGGATAGGAGCAAACAAGT	FE672203.1	-	-	-	-	-	-	-	-	-	-	-	-	-	-	-	-
1374	CATGAAAGAAAGAAAATGGTACAATA	FE673064.1	-	-	-	-	-	-	-	-	-	-	-	-	-	-	-	-
1376	CATGAAATAAGGAACACTGGGTCTTC	FE673061.1	-	-	-	-	-	-	-	-	-	-	-	-	-	-	-	-
1377	CATGGGCCGCCGGAATTGGCGGAGCA	FE673058.1	-	-	-	-	-	-	-	-	-	-	-	-	-	-	-	-
1378	CATGTGGAACTTACTGAAACAGAAGA	FE673057.1	-	-	-	-	-	-	-	-	-	-	-	-	-	-	-	-
1379	CATGGCTATTTCATCTCCACCTCACA	FE673056.1	-	-	-	-	-	-	-	-	-	-	-	-	-	-	-	-
1380	CATGCCACTGCATTCAGGATACGGCT	FE673055.1	-	-	-	-	-	-	-	-	-	-	-	-	-	-	-	-
1381	CATGGACCCCACAAAGTCAACTGGAC	FE672200.1	-	-	-	-	-	-	-	-	-	-	-	-	-	-	-	-
1382	CATGCTTTTGACCCTATCTACCAAAT	FE672199.1	-	-	-	-	-	-	-	-	-	-	-	-	-	-	-	-
1384	CATGGGAAAAAGACAAATTATACAAT	FE672196.1	-	-	-	-	-	-	-	-	-	-	-	-	-	-	-	-
1386	CATGGTCAAGCCTCCGGGGGGGGCTC	FE672194.1	-	-	-	-	-	-	-	-	-	-	-	-	-	-	-	-
1387	CATGGGCTTTTGTTCCGTCCCATCAA	FE672193.1	-	-	-	-	-	-	-	-	-	-	-	-	-	-	-	-
1388	CATGTAAAACTTCTACTACGTATGTG	FE672192.1	-	-	-	-	-	-	-	-	-	-	-	-	-	-	-	-
1389	CATGCCTCCAGGATTTCTACTTGAAG	FE672191.1	-	-	-	-	-	-	-	-	-	-	-	-	-	-	-	-
1391	CATGAAACAGATGTGATGACCTTGAA	FE673052.1	-	-	-	-	-	-	-	-	-	-	-	-	-	-	-	-
1392	CATGGGACCGGCTGATAGCCCATACA	FE673051.1	-	-	-	-	-	AJ501634	2e-06	0	0	DQ887085	7e-140	Arachis hypogaea ubiquitin carrier-like protein mRNA, complete cds	Ubiquitin carrier protein; ( EC=6.3.2.-)	Q06H23_ARAHY	-	-
1393	CATGGCTTCCTCTCCACCAAACTCCA	FE673050.1	-	-	-	-	-	-	-	-	-	-	-	-	-	-	-	-
1394	CATGATAATGCTTTTGTTGCATCTCG	FE673049.1	-	-	-	-	-	-	-	-	-	-	-	-	-	-	-	-
1395	CATGTAATTATTACTTAAAGGGCAAC	FE673047.1	-	-	-	-	-	-	-	-	-	-	-	-	-	-	-	-
1396	CATGAAGATGAAGGAGAAAGTGAATG	FE673046.1	-	-	-	-	-	-	-	-	-	-	-	-	-	-	-	-
1397	CATGGCTTCACATCCATCAAAACAGA	FE673045.1	-	-	-	-	-	-	-	-	-	-	-	-	-	-	-	-
1398	CATGTCTATAAATTGAAGCAATTTCT	FE673044.1	-	-	-	-	-	-	-	-	-	-	-	-	-	-	-	-
1399	CATGTAATTCTTCTGCACCCATTTCA	FE672189.1	-	-	-	-	-	TC122303	1e-07	0	0	AB083025	1e-90	Glycine max mRNA for syringolide-induced protein 19-1-5, complete cds	Syringolide-induced protein 19-1-5	Q8S902_SOYBN	-	-
1400	CATGGACTTCTCCCCAGGCTTCCATC	FE672186.1	-	-	-	-	-	TC118992	1e-07	0	0	AJ315851	0	Pisum sativum mRNA for 2-Cys peroxiredoxin	2-Cys peroxiredoxin	Q93X25_PEA	-	-
1401	CATGATTGAATTTGTGTTGGACGATT	FE672185.1	-	-	-	-	-	-	-	-	-	-	-	-	-	-	-	-
1402	CATGACAACTAGTAGATAATTATGGA	FE672184.1	-	-	-	-	-	-	-	-	-	-	-	-	-	-	-	-
1403	CATGGCATCCAAAACCGGTGACTTTT	FE672183.1	-	-	-	-	-	-	-	-	-	-	-	-	-	-	-	-
1404	CATGAAAAAGGGATTTGTATCAATAT	FE672182.1	-	-	-	-	-	TC118807	1e-07	0	0	AC187164	4e-46	Glycine max clone gmw2-53i18, complete sequence	-	-	-	-
1405	CATGTCTATCAAAGAATTCTCCAATA	FE672181.1	-	-	-	-	-	-	-	-	-	-	-	-	-	-	-	-
1406	CATGATTGTGATCTGCTTGGCATNTA	FE672180.1	-	-	-	-	-	-	-	-	-	-	-	-	-	-	-	-
1407	CATGTCTAGAACAAAATACCGTCATT	FE672179.1	-	-	-	-	-	-	-	-	-	-	-	-	-	-	-	-
1408	CATGTCGTTCAGTCCTTGATAGAGGG	FE673040.1	-	-	-	-	-	-	-	-	-	-	-	-	-	-	-	-
1409	CATGCATAACTTCCATACCAAGGTAA	FE673038.1	-	-	EU835853	-	0	TC133645	2e-06	0	0	M11005	0	Pea chloroplast PGII gene encoding a 34.5-kd putative thylakoid membrane protein, complete cds	Photosystem Q(B) protein precursor; (AltName: Full=32 kDa thylakoid membrane protein; AltName: Full=Photosystem II protein D1)	PSBA_PEA	-	-
1410	CATGTAATTGAATTCTATCAGTTACA	FE673035.1	-	-	-	-	-	-	-	-	-	-	-	-	-	-	-	-
1411	CATGTTGTTGGATTTGCTCCGGGTCC	FE673033.1	-	-	-	-	-	-	-	-	-	-	-	-	-	-	-	-
1412	CATGTACGCCGGCAAAGACGCCAGCA	FE673031.1	-	-	-	-	-	-	-	-	-	-	-	-	-	-	-	-
1414	CATGATGAATCCTTTATTTACCCACA	FE672176.1	-	-	-	-	-	-	-	-	-	-	-	-	-	-	-	-
1415	CATGCACTTTTCTATCCTCCAACTTA	FE672175.1	-	-	-	-	-	-	-	-	-	-	-	-	-	-	-	-
1417	CATGGATGGCTAATTTTCTCAGCCAC	FE672171.1	-	-	-	-	-	-	-	-	-	-	-	-	-	-	-	-
1418	CATGCCACTCGATCTGGATGGCGCCC	FE672170.1	-	-	-	-	-	-	-	-	-	-	-	-	-	-	-	-
1420	CATGTGTTTACCATTTTCTAATATTG	FE672168.1	-	-	-	-	-	-	-	-	-	-	-	-	-	-	-	-
1421	CATGGCTGTTATAAAACAAAAGGATT	FE672167.1	-	-	-	-	-	-	-	-	-	-	-	-	-	-	-	-
1422	CATGCGCGTCACTAATTAAATGACAA	FE673029.1	-	-	-	-	-	-	-	-	-	-	-	-	-	-	-	-
1423	CATGGGTAACCTGCATAACCTTAGTA	FE673028.1	-	-	-	-	-	-	-	-	-	-	-	-	-	-	-	-
1425	CATGATGAGTGGACTCTTCAGGATGA	FE673023.1	-	-	-	-	-	-	-	-	-	-	-	-	-	-	-	-
1426	CATGGTCTTTCTACAGAGCTGGGATA	FE673022.1	8e-07	Vicia faba aquaporin mRNA, complete cds	AY667436	Aquaporin	Q6BCH6_VICFA	EC366183	1e-07	0	0	AF386739	0	Medicago truncatula aquaporin protein PIP1;1 (PIP1;1) mRNA, complete cds	Aquaporin protein PIP11;	Q946J9_MEDTR	no	Correlated protein name
1427	CATGTTGGTTTACCAGGATCTCCTTA	FE673021.1	8e-07	M.sativa mRNA for TCTP-like protein	X98618	Translationally-controlled tumor protein homolog; ( Short=TCTP)	TCTP_MEDSA	TC116362	1e-07	0	0	X98618	0	M.sativa mRNA for TCTP-like protein	Translationally-controlled tumor protein homolog; ( Short=TCTP)	TCTP_MEDSA	ID direct correlation	-
1428	CATGGGTCTTGTTGAACAAAGAACCC	FE673020.1	-	-	-	-	-	TC117039	1e-07	0	0	AB236792	0	Trifolium pratense RNA for putative DNA binding protein, partial cds, clone: C1861	Putative DNA binding protein (Fragment)	Q2PEV8_TRIPR	-	-
1429	CATGATTTGCCTCCCCAATATGATGC	FE673019.1	-	-	-	-	-	-	-	-	-	-	-	-	-	-	-	-
1430	CATGCTGACTTCTTTGGTTTTTCCGG	FE673018.1	-	-	-	-	-	-	-	-	-	-	-	-	-	-	-	-
1431	CATGGCTTGAATCACTGAGAGATGCC	FE672165.1	-	-	-	-	-	-	-	-	-	-	-	-	-	-	-	-
1432	CATGAATTCTCTCACCTTCCCACGGC	FE672164.1	-	-	-	-	-	-	-	-	-	-	-	-	-	-	-	-
1433	CATGGGTATTGGACTTGCAAGAAAAT	FE672162.1	-	-	-	-	-	-	-	-	-	-	-	-	-	-	-	-
1436	CATGAGAAGAAATTCAGGCTCATCCT	FE672158.1	-	-	-	-	-	-	-	-	-	-	-	-	-	-	-	-
1437	CATGCACCATAAGTGATGACTCTGAT	FE672157.1	-	-	-	-	-	-	-	-	-	-	-	-	-	-	-	-
1438	CATGTAAAATTGAAAGACGGGCAAGA	FE672156.1	-	-	-	-	-	-	-	-	-	-	-	-	-	-	-	-
1440	CATGCACTTGGTTTTGTAGTGGTACA	FE673497.1	-	-	-	-	-	-	-	-	-	-	-	-	-	-	-	-
1441	CATGCTTCGCAAAGGTGTTGCATACA	FE673496.1	-	-	-	-	-	-	-	-	-	-	-	-	-	-	-	-
1444	CATGATGAATTAAAACCAAATTTTTT	FE673492.1	-	-	-	-	-	-	-	-	-	-	-	-	-	-	-	-
1445	CATGGGTGTCAAAGGTTTTTTTGAAG	FE673491.1	-	-	-	-	-	-	-	-	-	-	-	-	-	-	-	-
1446	CATGGCAGAAGCAATATCTTCCCAAT	FE673490.1	-	-	-	-	-	-	-	-	-	-	-	-	-	-	-	-
1447	CATGTGTTCACTTCGCTCAGATCAAT	FE673487.1	-	-	-	-	-	-	-	-	-	-	-	-	-	-	-	-
1450	CATGGGATTCACCTAAAGAACATATC	FE673484.1	-	-	-	-	-	-	-	-	-	-	-	-	-	-	-	-
1451	CATGTTTTCAACAACAACTAAGTCTT	FE673483.1	-	-	-	-	-	-	-	-	-	-	-	-	-	-	-	-
1453	CATGGAGGATTATTTGTATCCATCAT	FE673481.1	-	-	-	-	-	-	-	-	-	-	-	-	-	-	-	-
1454	CATGAATGTACTGCATTCCATTCCAT	FE673480.1	-	-	-	-	-	-	-	-	-	-	-	-	-	-	-	-
1455	CATGTCACCTCAATGGGTACTGCTGG	FE673479.1	-	-	-	-	-	-	-	-	-	-	-	-	-	-	-	-
1456	CATGGGTATTCTTTCCCGCCTCGTCA	FE673478.1	-	-	-	-	-	-	-	-	-	-	-	-	-	-	-	-
1460	CATGAATGAAAAACCCCCATTTACAG	FE673470.1	-	-	-	-	-	-	-	-	-	-	-	-	-	-	-	-
1461	CATGCAGCAAATTGAATAGTGCAATG	FE673469.1	-	-	-	-	-	-	-	-	-	-	-	-	-	-	-	-
1462	CATGTTTCTTCAAGAAAGCAGTCAAG	FE673468.1	-	-	-	-	-	-	-	-	-	-	-	-	-	-	-	-
1463	CATGCTACAAAAATATTTTCATACAT	FE673466.1	-	-	-	-	-	-	-	-	-	-	-	-	-	-	-	-
1466	CATGGTGAAACACCGTCTGCTGATTA	FE673462.1	-	-	-	-	-	-	-	-	-	-	-	-	-	-	-	-
1467	CATGGACCAAACTTGGGTAACCCAAG	FE673461.1	-	-	-	-	-	-	-	-	-	-	-	-	-	-	-	-
1469	CATGGATGATAGCAATGAAGATCAAA	FE673458.1	-	-	-	-	-	-	-	-	-	-	-	-	-	-	-	-
1470	CATGCAAAATGGTAGGACCATATAAA	FE673457.1	8e-07	Cicer arietinum mRNA for unidentified protein	AJ225026	Putative uncharacterized protein	O65742_CICAR	-	-	-	-	-	-	-	-	-	-	-
1471	CATGGACCCCAATCAAGGCCTTTGTC	FE673456.1	-	-	-	-	-	-	-	-	-	-	-	-	-	-	-	-
1473	CATGTGGCGTTCCTCTTCGTCTAAGC	FE673454.1	-	-	-	-	-	-	-	-	-	-	-	-	-	-	-	-
1474	CATGACGACCTGCTTCTGGCCGCCTC	FE673453.1	-	-	-	-	-	-	-	-	-	-	-	-	-	-	-	-
1478	CATGTGAAACTGAGCTGCCCAGACTT	FE673449.1	-	-	-	-	-	-	-	-	-	-	-	-	-	-	-	-
1480	CATGCCCTGAAATCAGCTGCGTCAAA	FE673440.1	-	-	-	-	-	-	-	-	-	-	-	-	-	-	-	-
1481	CATGGGACGGTGAACTCCGTCTTTGG	FE673439.1	-	-	-	-	-	-	-	-	-	-	-	-	-	-	-	-
1482	CATGTCCTAACATCATCGGTGAAGTC	FE673438.1	-	-	-	-	-	TC113712	1e-07	0	0	EU380189	8e-175	Glycine max cultivar Sinpaldal 2 dihydroflavonol reductase mRNA, complete cds	Dihydroflavonol reductase	B0LVF3_SOYBN	-	-
1483	CATGTCAAAAACTTATATCATATCCT	FE673437.1	-	-	-	-	-	-	-	-	-	-	-	-	-	-	-	-
1484	CATGTTCGCTGAATAAATAGTATGTT	FE673436.1	-	-	-	-	-	-	-	-	-	-	-	-	-	-	-	-
1486	CATGCTAAGATGAGTAAAAAGTATGA	FE673433.1	-	-	-	-	-	-	-	-	-	-	-	-	-	-	-	-
1487	CATGGCCCCCTCGGCCGAACACACCG	FE673431.1	-	-	-	-	-	-	-	-	-	-	-	-	-	-	-	-
1488	CATGATGAACACAGAGGTGGCGTCTT	FE673430.1	-	-	-	-	-	-	-	-	-	-	-	-	-	-	-	-
1489	CATGGCCAAAAAGAACCTCAATCCTC	FE673426.1	-	-	-	-	-	-	-	-	-	-	-	-	-	-	-	-
1491	CATGATAATCCTCCCACCCCTTGAAA	FE673423.1	-	-	-	-	-	-	-	-	-	-	-	-	-	-	-	-
1492	CATGAAGAAACAAATGCTTATATATT	FE673421.1	-	-	-	-	-	-	-	-	-	-	-	-	-	-	-	-
1495	CATGCAAAGCACATCTATTAGTGTGT	FE673417.1	-	-	-	-	-	-	-	-	-	-	-	-	-	-	-	-
1498	CATGCGCGTCTCTAATTAGATGACGA	FE673410.1	-	-	-	-	-	-	-	-	-	-	-	-	-	-	-	-
1499	CATGGTAAATTGTGAAAAAGCAAACA	FE673409.1	-	-	-	-	-	-	-	-	-	-	-	-	-	-	-	-
1500	CATGTGAAGATACCATTGCTGAAAGA	FE673408.1	8e-07	Medicago truncatula mRNA for beclin 1 protein (atg6 gene)	AM075833	Beclin 1 protein	Q4A185_MEDTR	TC117655	1e-07	0	0	AM075833	0	Medicago truncatula mRNA for beclin 1 protein (atg6 gene)	Beclin 1 protein	Q4A185_MEDTR	ID direct correlation	-
1501	CATGCCAGAGAAGGGTGACTGGCGTT	FE673407.1	-	-	-	-	-	-	-	-	-	-	-	-	-	-	-	-
1503	CATGCCTTGTTCAAAGACACCGACCC	FE673405.1	-	-	-	-	-	-	-	-	-	-	-	-	-	-	-	-
1505	CATGTGGCATCTGGTACAAGCCGGTT	FE673403.1	-	-	-	-	-	-	-	-	-	-	-	-	-	-	-	-
1506	CATGCAAGAACCCATCATAAAGCTTT	FE673402.1	-	-	-	-	-	-	-	-	-	-	-	-	-	-	-	-
1507	CATGCTTCACATAATCCAGATCGCCC	FE671768.1	-	-	-	-	-	-	-	-	-	-	-	-	-	-	-	-
1508	CATGCTTTGCTACATTAAATCCAGTC	FE671767.1	-	-	-	-	-	-	-	-	-	-	-	-	-	-	-	-
1509	CATGCTGATCCTGATGATCTTGGGAA	FE671765.1	8e-07	Arachis hypogaea cultivar JL-24 Cu-Zn superoxide dismutase mRNA, complete cds	DQ499511	Superoxide dismutase [Cu-Zn]; ( EC=1	Q1HDS7_ARAHY	TC115710	1e-07	0	0	AB189165	0	Pisum sativum mRNA for copper zinc superoxide dismutase, complete cds	Superoxide dismutase	Q5DWE8_PEA	no	Correlated protein name
1510	CATGAAACTTTGCCTTAGCCAAAAGC	FE671764.1	-	-	-	-	-	-	-	-	-	-	-	-	-	-	-	-
1511	CATGTTAATTACGGTTCGACCGACCT	FE671762.1	-	-	-	-	-	-	-	-	-	-	-	-	-	-	-	-
1512	CATGGAGCTCTATTGCAGAGCAGCAA	FE671761.1	-	-	-	-	-	-	-	-	-	-	-	-	-	-	-	-
1513	CATGGAGTTGATCAAACCACACCAGA	FE671760.1	-	-	-	-	-	-	-	-	-	-	-	-	-	-	-	-
1514	CATGGAGAATCGATCCTTCGACCACG	FE671758.1	-	-	-	-	-	-	-	-	-	-	-	-	-	-	-	-
1515	CATGTTCTCAAACTCACCTCCATCTT	FE671756.1	-	-	-	-	-	-	-	-	-	-	-	-	-	-	-	-
1516	CATGGTTTTCTGGGTTTTTGGTTATG	FE671755.1	-	-	-	-	-	-	-	-	-	-	-	-	-	-	-	-
1518	CATGATGTGTGACCAACCAAAGGTGT	FE671751.1	-	-	-	-	-	-	-	-	-	-	-	-	-	-	-	-
1519	CATGTTTCCTGTGAGAGGTACTTTGG	FE671750.1	-	-	-	-	-	-	-	-	-	-	-	-	-	-	-	-
1521	CATGGGTGGAACAAATGGTAACTATC	FE671746.1	-	-	-	-	-	-	-	-	-	-	-	-	-	-	-	-
1522	CATGCAAAGTTGAGAATGTAAAACGG	FE671743.1	-	-	-	-	-	-	-	-	-	-	-	-	-	-	-	-
1524	CATGTATATTGAGGTTTTTAACAGAG	FE671740.1	-	-	-	-	-	-	-	-	-	-	-	-	-	-	-	-
1525	CATGGAGTTGTCAAAACCCAGCCCAG	FE671739.1	-	-	-	-	-	-	-	-	-	-	-	-	-	-	-	-
1526	CATGTTTTACTTTTTCTATCTTTGTT	FE671738.1	8e-07	Cicer arietinum partial mRNA for putative proline-rich protein APG isolog	AJ276421	Putative proline-rich protein APG isolog (Fragment)	Q9FT04_CICAR	-	-	-	-	-	-	-	-	-	-	-
1529	CATGGCTTCCAATCAGCCTCCTTAAG	FE671733.1	-	-	-	-	-	-	-	-	-	-	-	-	-	-	-	-
1530	CATGGTGCTAATAGCGGTCTTGATAT	FE671732.1	-	-	-	-	-	-	-	-	-	-	-	-	-	-	-	-
1531	CATGGATCTTACTGAGTTGCCACTAT	FE671730.1	-	-	-	-	-	-	-	-	-	-	-	-	-	-	-	-
1532	CATGGATTCCGAGAACACGGCCAAGG	FE671728.1	-	-	-	-	-	-	-	-	-	-	-	-	-	-	-	-
1533	CATGGAAATAATTCACAATCCCACAC	FE671727.1	-	-	-	-	-	-	-	-	-	-	-	-	-	-	-	-
1534	CATGAACGACATCCACGGAGTTGCGA	FE671726.1	-	-	-	-	-	-	-	-	-	-	-	-	-	-	-	-
1535	CATGTACTTTGATAGGCTTGTTCAGA	FE671724.1	-	-	-	-	-	-	-	-	-	-	-	-	-	-	-	-
1537	CATGGGACAATTTCTTTAGGAACTTT	FE671720.1	-	-	-	-	-	-	-	-	-	-	-	-	-	-	-	-
1538	CATGGGATGTACTGCTGAGTATGGTG	FE671718.1	-	-	-	-	-	-	-	-	-	-	-	-	-	-	-	-
1539	CATGGCACAGGAAATCAACCGAACCC	FE671714.1	-	-	-	-	-	-	-	-	-	-	-	-	-	-	-	-
1540	CATGGAGATAATTCAAAATCCCACAC	FE671712.1	-	-	-	-	-	-	-	-	-	-	-	-	-	-	-	-
1541	CATGTTACTATTTTTTTCTCTAGAAA	FE671711.1	-	-	-	-	-	-	-	-	-	-	-	-	-	-	-	-
1542	CATGTTTCTCTATCCACCCTAGTACA	FE671710.1	-	-	-	-	-	-	-	-	-	-	-	-	-	-	-	-
1543	CATGAAAGGTGTAGCAACAGCTGCTG	FE671709.1	-	-	-	-	-	-	-	-	-	-	-	-	-	-	-	-
1544	CATGGACGCAGCATCGCAGCTTGTCT	FE671708.1	-	-	-	-	-	-	-	-	-	-	-	-	-	-	-	-
1545	CATGTCTTCTGTCACAGATATTCCCA	FE671707.1	-	-	-	-	-	-	-	-	-	-	-	-	-	-	-	-
1547	CATGTAGTACCAAGAGGAACAACTTG	FE671702.1	-	-	-	-	-	-	-	-	-	-	-	-	-	-	-	-
1548	CATGGGTTTACATAATGCCTCAGCTT	FE671701.1	-	-	-	-	-	-	-	-	-	-	-	-	-	-	-	-
1549	CATGGCAAACGAAACTATACTTATTC	FE671700.1	-	-	-	-	-	-	-	-	-	-	-	-	-	-	-	-
1551	CATGCCTTTGAGCCTCCTCCACTAGT	FE671698.1	-	-	-	-	-	-	-	-	-	-	-	-	-	-	-	-
1552	CATGTGGCATCAAATACAGGACCTGC	FE671694.1	-	-	-	-	-	-	-	-	-	-	-	-	-	-	-	-
1553	CATGGCAGCTGCTTCTCCTATGGCAA	FE671691.1	-	-	-	-	-	TC127666	1e-07	0	0	U12150	5e-22	Glycine max Essex protease inhibitor mRNA, complete cds	Protease inhibitor	Q39807_SOYBN	-	-
1554	CATGCTCAGCTCAATAGCTTAGAAGA	FE671690.1	-	-	-	-	-	-	-	-	-	-	-	-	-	-	-	-
1556	CATGAAAACAATGGAAGGAAAAGTGG	FE671684.1	-	-	-	-	-	TC123409	7e-06	0	0	M31025	1e-51	Pea chloroplast ribosomal protein S17 (rps17) mRNA, 3' end	30S ribosomal protein S17, chloroplastic precursor (Fragment); (AltName: Full=CS17)	RR17_PEA	-	-
1557	CATGGCTACCCTCCAGAAGGGGGTTA	FE671679.1	-	-	-	-	-	-	-	-	-	-	-	-	-	-	-	-
1558	CATGTACCCTCCTCTCCCTCAAAGCA	FE671678.1	-	-	-	-	-	-	-	-	-	-	-	-	-	-	-	-
1559	CATGAGATACTATAAGCATTCAATCC	FE671677.1	-	-	-	-	-	-	-	-	-	-	-	-	-	-	-	-
1560	CATGGGTTGTTGTCTCCTGAGAAAGC	FE671675.1	-	-	-	-	-	-	-	-	-	-	-	-	-	-	-	-
1561	CATGGAGTTCTATATTGTAATTTCAC	FE671674.1	-	-	-	-	-	-	-	-	-	-	-	-	-	-	-	-
1562	CATGATGATGCCTCCTCAGCCACAAC	FE673016.1	-	-	-	-	-	-	-	-	-	-	-	-	-	-	-	-
1563	CATGGCTATTTGGCTATGGTATTGGA	FE673014.1	-	-	-	-	-	TC118029	5e-07	0	0	DQ889550	5e-89	Arachis hypogaea clone 1E39 lactoylglutathione lyase mRNA, complete cds	-	-	-	-
1564	CATGGATTAGCATTATGTCGTTCCTA	FE673012.1	-	-	-	-	-	-	-	-	-	-	-	-	-	-	-	-
1565	CATGAATAATCTATCAAATATAACAC	FE673009.1	-	-	-	-	-	-	-	-	-	-	-	-	-	-	-	-
1566	CATGGCTTTGATGAGATCCTTCTTCT	FE673007.1	-	-	-	-	-	TC117022	1e-07	0	0	U78952	3e-148	Pisum sativum hydroxyproline rich glycoprotein PsHRGP1 mRNA, partial cds	Probable 60S ribosomal protein L14; (AltName: Full=Hydroxyproline-rich glycoprotein HRGP1)	RL14_PEA	-	-
1567	CATGTTCCCATTTGCCACCTCTGATG	FE673006.1	-	-	-	-	-	-	-	-	-	-	-	-	-	-	-	-
1568	CATGGGAGGTGACGCAACCGCTGAAA	FE672537.1	-	-	-	-	-	-	-	-	-	-	-	-	-	-	-	-
1570	CATGCGTACAGCTGCACAATGACCAA	FE672534.1	-	-	-	-	-	-	-	-	-	-	-	-	-	-	-	-
1571	CATGCTTGAAGGAAAAACTCCGATTC	FE672532.1	-	-	-	-	-	-	-	-	-	-	-	-	-	-	-	-
1572	CATGGCATTGGTGTTAAACAAGAACT	FE672531.1	-	-	-	-	-	-	-	-	-	-	-	-	-	-	-	-
1573	CATGCATCAACATTCAAACCGCCGCA	FE672530.1	-	-	-	-	-	-	-	-	-	-	-	-	-	-	-	-
1574	CATGTTGTCATTGTTGGTGGTGGGAT	FE672529.1	-	-	-	-	-	-	-	-	-	-	-	-	-	-	-	-
1575	CATGAGCAGTTCCTTCAGTAAACTTC	FE672527.1	-	-	-	-	-	-	-	-	-	-	-	-	-	-	-	-
1576	CATGGGTTAGTCGATACTAAGGGACG	FE672526.1	-	-	-	-	-	-	-	-	-	-	-	-	-	-	-	-
1578	CATGTACATCCTCTTTGTCAGTTACT	FE673001.1	-	-	-	-	-	-	-	-	-	-	-	-	-	-	-	-
1579	CATGTTGGTATTCTTGACTCTTTGCG	FE673000.1	-	-	-	-	-	-	-	-	-	-	-	-	-	-	-	-
1580	CATGCTGGTGGCATAGAGCAACTATC	FE672999.1	-	-	-	-	-	-	-	-	-	-	-	-	-	-	-	-
1581	CATGTGTAACTTCAGATTCTATTAGT	FE672996.1	-	-	-	-	-	-	-	-	-	-	-	-	-	-	-	-
1582	CATGGCGGTTTCAGGTTTAAAAACTG	FE672995.1	-	-	-	-	-	-	-	-	-	-	-	-	-	-	-	-
1583	CATGAGTAAGTGAGAACCATATGCAT	FE672994.1	-	-	-	-	-	-	-	-	-	-	-	-	-	-	-	-
1584	CATGGTGCCAATAGACTCGGTGCAAA	FE672524.1	-	-	-	-	-	-	-	-	-	-	-	-	-	-	-	-
1586	CATGCTATGGAAATTATTCATTTGCT	FE672516.1	8e-07	Cicer arietinum mRNA for 40S ribosomal protein S5	AJ005346	40S ribosomal protein S5 (Fragment)	RS5_CICAR	-	-	-	-	-	-	-	-	-	-	-
1588	CATGTTATGCCACTTCTGGAAATTGT	FE672992.1	-	-	-	-	-	-	-	-	-	-	-	-	-	-	-	-
1589	CATGGCAACTAGACTTCAGTTTGAGA	FE672990.1	-	-	-	-	-	TC117453	5e-07	0	0	AB236812	5e-151	Trifolium pratense RNA for putative eukaryotic translation initiation factor 6, complete cds, clone: C213	Putative eukaryotic translation initiation factor 6	Q2PET8_TRIPR	-	-
1590	CATGTCATTTTGCATCCTTTCCAGCG	FE672989.1	-	-	-	-	-	-	-	-	-	-	-	-	-	-	-	-
1591	CATGGCCGGTAATCAATTAAACGGCG	FE672987.1	-	-	-	-	-	-	-	-	-	-	-	-	-	-	-	-
1593	CATGCTGATGATCTCCTAGCTCCTGT	FE672985.1	-	-	-	-	-	-	-	-	-	-	-	-	-	-	-	-
1594	CATGACCATAATTACCACCGCCGTGG	FE672983.1	8e-07	Cicer arietinum mRNA for glycine-rich protein 2, partial	AJ012829	Glycine-rich protein 2 (Fragment)	Q9ZRV2_CICAR	-	-	-	-	-	-	-	-	-	-	-
1595	CATGTTGTAGCTGCTCCCTGCTGGAC	FE672512.1	5e-05	Pisum sativum short-chain dehydrogenase Tic32 mRNA, complete cds; nuclear gene for chloroplast product	AY488758	Short-chain dehydrogenase Tic32	Q6RVV4_PEA	-	-	-	-	-	-	-	-	-	-	-
1596	CATGAATGATCTTGGTATGCTAATGG	FE672511.1	-	-	-	-	-	-	-	-	-	-	-	-	-	-	-	-
1598	CATGTATTATCTGTACTAATGAACTT	FE672508.1	-	-	-	-	-	-	-	-	-	-	-	-	-	-	-	-
1599	CATGCAATCACTGCTTATGCAAGGGA	FE672506.1	-	-	-	-	-	-	-	-	-	-	-	-	-	-	-	-
1600	CATGACGATCAACAAACTCCTCACCC	FE672505.1	-	-	-	-	-	-	-	-	-	-	-	-	-	-	-	-
1601	CATGGCTTAGTGATATTGAATAATGT	FE672504.1	8e-07	Cicer arietinum defensin (AFP) gene, promoter region and complete cds	DQ342338	Defensin	Q2I2W0_CICAR	-	-	-	-	-	-	-	-	-	-	-
1603	CATGAAATCCACACACGAAAAGTGGA	FE672502.1	-	-	-	-	-	-	-	-	-	-	-	-	-	-	-	-
1605	CATGGAATGGAAGTTCGCCTTGGTCT	FE672978.1	-	-	-	-	-	TC121582	7e-06	0	0	DQ889521	4e-21	Arachis hypogaea clone UU4 unknown mRNA	-	-	-	-
1606	CATGAAGAAAATGTTCATAGAGTGTT	FE672977.1	-	-	-	-	-	-	-	-	-	-	-	-	-	-	-	-
1607	CATGGAGGAACAGCTACTTCAAGTGA	FE672976.1	8e-07	Cicer arietinum partial mRNA for cysteine proteinase (cacG2 gene)	X93220	-	-	-	-	-	-	-	-	-	-	-	-	-
1608	CATGGGCTTTAAGAAAAAAGGAGCAA	FE672974.1	-	-	-	-	-	-	-	-	-	-	-	-	-	-	-	-
1609	CATGGAAGCGATTCTGTTGAAAGTGC	FE672973.1	-	-	-	-	-	-	-	-	-	-	-	-	-	-	-	-
1610	CATGTCCCATCCAGGAAAACCGCCAG	FE672971.1	-	-	-	-	-	-	-	-	-	-	-	-	-	-	-	-
1611	CATGACTTGAGTTTTGCTTGCCATTT	FE672501.1	-	-	-	-	-	-	-	-	-	-	-	-	-	-	-	-
1612	CATGATGTTGTTCTGGCTTGTGTACT	FE672499.1	-	-	-	-	-	-	-	-	-	-	-	-	-	-	-	-
1613	CATGGGGCACCCTACCCACCATTTTG	FE672498.1	-	-	-	-	-	-	-	-	-	-	-	-	-	-	-	-
1615	CATGAAATCATCATTGAACTTTTTGA	FE672493.1	-	-	-	-	-	TC114976	1e-07	0	0	EU165372	0	Glycine max alanine aminotransferase 2 (AlaAT2) mRNA, complete cds	Alanine aminotransferase 2	A8IKE5_SOYBN	-	-
1616	CATGGTGTAGGAGCTGAAATCTGGTT	FE672490.1	-	-	-	-	-	-	-	-	-	-	-	-	-	-	-	-
1617	CATGCCGTTGTCCTTAGTGTAAAAAT	FE672968.1	-	-	-	-	-	-	-	-	-	-	-	-	-	-	-	-
1618	CATGCATTTTGCTGTCTCACTCTGTA	FE672967.1	-	-	-	-	-	-	-	-	-	-	-	-	-	-	-	-
1619	CATGAAGGTAGTATGTGTAGCTCTAA	FE672964.1	-	-	-	-	-	-	-	-	-	-	-	-	-	-	-	-
1620	CATGTATCCAAATATATAAATAAGTT	FE672959.1	-	-	-	-	-	-	-	-	-	-	-	-	-	-	-	-
1621	CATGAGGAAAGTCAAAAAAGTTCTCC	FE672958.1	-	-	-	-	-	-	-	-	-	-	-	-	-	-	-	-
1623	CATGTAATGAACTCACTTTAAAAGAT	FE672486.1	-	-	-	-	-	-	-	-	-	-	-	-	-	-	-	-
1625	CATGATGGCACCGAAGCAGAAAATTA	FE672483.1	-	-	-	-	-	-	-	-	-	-	-	-	-	-	-	-
1626	CATGAACGTGAGGAGATTCAGGCTGA	FE672482.1	8e-07	Pisum sativum coxVb gene for cytochrome c oxidase subunit Vb, complete cds, note: PscoxVb-3	AB236127	Cytochrome c oxidase subunit Vb	Q0KKQ3_PEA	-	-	-	-	-	-	-	-	-	-	-
1627	CATGGATGAAATCTCGGGAGTATTCG	FE672481.1	-	-	-	-	-	-	-	-	-	-	-	-	-	-	-	-
1628	CATGGCTCTGGAAACGTAGGTCAGTC	FE672480.1	-	-	-	-	-	-	-	-	-	-	-	-	-	-	-	-
1629	CATGGTGAAACCTCTCAGTCACTTTC	FE672479.1	-	-	-	-	-	-	-	-	-	-	-	-	-	-	-	-
1630	CATGAATGGTACCTTAAATTCCAAGG	FE672957.1	-	-	-	-	-	-	-	-	-	-	-	-	-	-	-	-
1632	CATGCCTCTCCTGCTGTGTGTATCTT	FE672953.1	-	-	-	-	-	-	-	-	-	-	-	-	-	-	-	-
1635	CATGTACTCTCTCTTTCTCCTCTCTT	FE672949.1	-	-	-	-	-	-	-	-	-	-	-	-	-	-	-	-
1636	CATGAGTTTCCTGAAGGATCACTACG	FE672948.1	-	-	-	-	-	-	-	-	-	-	-	-	-	-	-	-
1637	CATGCAAAAGAGAATCAGAGTTATTA	FE672947.1	-	-	-	-	-	-	-	-	-	-	-	-	-	-	-	-
1639	CATGTAGCAGTATCACACGATGACAT	FE672477.1	-	-	-	-	-	-	-	-	-	-	-	-	-	-	-	-
1640	CATGTAATTTTAAATCATTACAATCA	FE672476.1	-	-	-	-	-	-	-	-	-	-	-	-	-	-	-	-
1641	CATGGTCATAAGTTCCAATTTAAGCT	FE672475.1	-	-	-	-	-	-	-	-	-	-	-	-	-	-	-	-
1642	CATGCGCCGACGTCGTTTTCCCCTTC	FE672473.1	-	-	-	-	-	-	-	-	-	-	-	-	-	-	-	-
1643	CATGCCTTTGAGGATAGCCTCAAATC	FE672472.1	-	-	-	-	-	-	-	-	-	-	-	-	-	-	-	-
1645	CATGGCCGCACCACCTCCCACCAAGG	FE672468.1	-	-	-	-	-	-	-	-	-	-	-	-	-	-	-	-
1646	CATGGCAAAGTACTTTGTTGGAGAGA	FE672467.1	-	-	-	-	-	-	-	-	-	-	-	-	-	-	-	-
1647	CATGGTGGATCGAGGTAACTGCACAT	FE672466.1	-	-	-	-	-	-	-	-	-	-	-	-	-	-	-	-
1648	CATGTGGGAACGTTACTGTCGTGCAG	FE672942.1	-	-	-	-	-	-	-	-	-	-	-	-	-	-	-	-
1649	CATGTGGGCCGGTACGTGCAGGGTTG	FE672941.1	-	-	-	-	-	-	-	-	-	-	-	-	-	-	-	-
1650	CATGGTACGGTCGAGAACGTGTTAAG	FE672939.1	-	-	-	-	-	-	-	-	-	-	-	-	-	-	-	-
1652	CATGTGTTTCTGGCTGTTGGAAGGGT	FE672936.1	-	-	-	-	-	-	-	-	-	-	-	-	-	-	-	-
1653	CATGATGATGACCCTCCACACTCCCA	FE672935.1	-	-	-	-	-	-	-	-	-	-	-	-	-	-	-	-
1654	CATGTCATTCCTCTCAGGCTCTCCAA	FE672934.1	-	-	-	-	-	-	-	-	-	-	-	-	-	-	-	-
1655	CATGTCTGAAATCCTTCTAAATCATC	FE672464.1	-	-	-	-	-	-	-	-	-	-	-	-	-	-	-	-
1656	CATGCAGAGCTGGTTCTTGCTCTTCT	FE672460.1	-	-	-	-	-	-	-	-	-	-	-	-	-	-	-	-
1658	CATGAAATGTGGAGAGTGTCCCGTGT	FE672458.1	-	-	-	-	-	-	-	-	-	-	-	-	-	-	-	-
1661	CATGTGCCAGGACTTACGAGATTGAG	FE672933.1	-	-	-	-	-	-	-	-	-	-	-	-	-	-	-	-
1662	CATGACTGTGCTGTACAGAGTTGTGA	FE672932.1	-	-	-	-	-	-	-	-	-	-	-	-	-	-	-	-
1663	CATGGTGTAGGCCTTCTGGATCGGAT	FE672929.1	-	-	-	-	-	-	-	-	-	-	-	-	-	-	-	-
1664	CATGTCTTCACAGTCTATAAGTTCGT	FE672927.1	-	-	-	-	-	-	-	-	-	-	-	-	-	-	-	-
1665	CATGCGATTTGCACAACCCAGGACAC	FE672925.1	-	-	-	-	-	-	-	-	-	-	-	-	-	-	-	-
1666	CATGTGGGCTTTGTTGGGAGCATTGG	FE672924.1	-	-	-	-	-	-	-	-	-	-	-	-	-	-	-	-
1667	CATGAAATAAAACAAACGAATCATCA	FE672923.1	-	-	-	-	-	-	-	-	-	-	-	-	-	-	-	-
1668	CATGGCTCTATGCTACTCGAAACCAT	FE672922.1	-	-	-	-	-	-	-	-	-	-	-	-	-	-	-	-
1669	CATGTGAGAGCGACTCAAATGAATCA	FE672453.1	-	-	-	-	-	-	-	-	-	-	-	-	-	-	-	-
1671	CATGGTGGTGGTGCATTCTCAGGAAA	FE672451.1	-	-	-	-	-	-	-	-	-	-	-	-	-	-	-	-
1672	CATGAGCCACCCTAACCATTGACCCA	FE672450.1	-	-	-	-	-	-	-	-	-	-	-	-	-	-	-	-
1675	CATGTATGTGTAAAGCTGCCCTTCCC	FE672445.1	-	-	-	-	-	-	-	-	-	-	-	-	-	-	-	-
1677	CATGCAAGGCACAACAAATTGTAGCT	FE671384.1	-	-	-	-	-	-	-	-	-	-	-	-	-	-	-	-
1679	CATGATGAAGACACGACGGACATACA	FE671381.1	-	-	-	-	-	-	-	-	-	-	-	-	-	-	-	-
1681	CATGAAAACGAAGAAAGCACTCGGAG	FE671379.1	1e-05	Arachis hypogaea clone 1L41 high mobility group protein 2 mRNA, complete cds	DQ889548	-	-	-	-	-	-	-	-	-	-	-	-	-
1682	CATGTAAGTAACTACATCATTGCATT	FE671376.1	-	-	-	-	-	-	-	-	-	-	-	-	-	-	-	-
1683	CATGTACGTAAATTCTCCAGGAGGAT	FE671375.1	-	-	-	-	-	-	-	-	-	-	-	-	-	-	-	-
1685	CATGGACAATTAATGCTGTGGTCGCA	FE671372.1	-	-	-	-	-	-	-	-	-	-	-	-	-	-	-	-
1686	CATGGAGGAGGATATGTTGGGGAAGC	FE671371.1	8e-07	Cicer arietinum mRNA for glycine-rich protein 2, partial	AJ012829	Glycine-rich protein 2 (Fragment)	Q9ZRV2_CICAR	-	-	-	-	-	-	-	-	-	-	-
1688	CATGAAGAAAGAATAAGTGGTGCACG	FE671369.1	-	-	-	-	-	-	-	-	-	-	-	-	-	-	-	-
1689	CATGGTGTATTTGAGAAACGTGCACC	FE671367.1	-	-	-	-	-	-	-	-	-	-	-	-	-	-	-	-
1690	CATGAAGTACAATAAATAAGAAAAAG	FE671366.1	8e-07	Cicer arietinum hydroxymethyl transferase mRNA, partial cds	AF416481	Hydroxymethyl transferase (Fragment)	Q945F1_CICAR	-	-	-	-	-	-	-	-	-	-	-
1691	CATGGAATCATTGCTGCTTGGTGTTA	FE671365.1	-	-	-	-	-	-	-	-	-	-	-	-	-	-	-	-
1692	CATGGGAAAGTATAGAATCAGTGAGG	FE671364.1	-	-	-	-	-	-	-	-	-	-	-	-	-	-	-	-
1693	CATGGAATTGAAGTGGCTGTGGAGTT	FE671363.1	-	-	-	-	-	-	-	-	-	-	-	-	-	-	-	-
1694	CATGACATTAATTTGGCTGTAGCAGG	FE671362.1	-	-	-	-	-	-	-	-	-	-	-	-	-	-	-	-
1695	CATGCTGGACATTCAGCACAACTGGA	FE671361.1	8e-07	Medicago sativa cysteine protease (CP1) mRNA, complete cds	DQ492683	Cysteine protease; ( EC=3	Q1KK73_MEDSA	DW017110	1e-07	0	0	DQ492683	0	Medicago sativa cysteine protease (CP1) mRNA, complete cds	Cysteine protease; ( EC=3.4.22.2)	Q1KK73_MEDSA	ID direct correlation	-
1696	CATGAAGTCCGCAGCATCTGGATATC	FE671360.1	8e-07	Cicer arietinum mRNA for catalase	AJ131046	Catalase (Fragment); ( EC=1	Q9ZRU4_CICAR	-	-	-	-	-	-	-	-	-	-	-
1698	CATGCCAAGCGTGTAACAATTATGCC	FE671356.1	-	-	-	-	-	-	-	-	-	-	-	-	-	-	-	-
1699	CATGAGTTTGGCAATATGAAGTTAAT	FE671355.1	-	-	-	-	-	-	-	-	-	-	-	-	-	-	-	-
1700	CATGACTCCAGCAGTTATTCCAGCAC	FE671353.1	-	-	-	-	-	-	-	-	-	-	-	-	-	-	-	-
1701	CATGTGTGACCTGTATATTTGTGTTG	FE671352.1	-	-	-	-	-	-	-	-	-	-	-	-	-	-	-	-
1703	CATGAGACCCTTGAGCATTATGACCA	FE671350.1	-	-	-	-	-	-	-	-	-	-	-	-	-	-	-	-
1704	CATGCTCAAAACGCTTGTGGTGTGTC	FE671349.1	-	-	-	-	-	-	-	-	-	-	-	-	-	-	-	-
1705	CATGGTCGTTCTCTTCTCACCTTGCG	FE671348.1	-	-	-	-	-	-	-	-	-	-	-	-	-	-	-	-
1706	CATGCATTCCAAATCTATCGAGAAGC	FE671347.1	-	-	-	-	-	-	-	-	-	-	-	-	-	-	-	-
1707	CATGGCATACTTCTGAGTCCAGCTGC	FE671346.1	8e-07	Pisum sativum ubiquitin conjugating enzyme E2 mRNA, partial cds	AY702916	Ubiquitin conjugating enzyme E2 (Fragment); ( EC=6	Q64FZ8_PEA	-	-	-	-	-	-	-	-	-	-	-
1708	CATGAATTTTTTATTTCTTATCACTG	FE671344.1	-	-	-	-	-	-	-	-	-	-	-	-	-	-	-	-
1709	CATGTCGGCCAAGATAGCATTGGGAA	FE671343.1	-	-	-	-	-	-	-	-	-	-	-	-	-	-	-	-
1710	CATGTGAAGGATGTGTTGGAGCAGTG	FE671342.1	-	-	-	-	-	-	-	-	-	-	-	-	-	-	-	-
1711	CATGATCACTTCACAGAAACTTATTA	FE671341.1	-	-	-	-	-	-	-	-	-	-	-	-	-	-	-	-
1712	CATGGCACTTCTTTCTATCGAAAATA	FE671340.1	-	-	-	-	-	-	-	-	-	-	-	-	-	-	-	-
1713	CATGCAGGGCTGTACAATAGCAGATA	FE671339.1	-	-	-	-	-	-	-	-	-	-	-	-	-	-	-	-
1714	CATGGCTATGATGGCAGTGATAATCA	FE671338.1	-	-	-	-	-	-	-	-	-	-	-	-	-	-	-	-
1717	CATGGAGCCCTACTCCAAGAAGGTCT	FE671334.1	-	-	-	-	-	-	-	-	-	-	-	-	-	-	-	-
1721	CATGTGTGAAACCACCTGCACCTGCT	FE671329.1	-	-	-	-	-	-	-	-	-	-	-	-	-	-	-	-
1722	CATGCCTTCTTCCTCTTCGCAGAGAC	FE671326.1	-	-	-	-	-	-	-	-	-	-	-	-	-	-	-	-
1724	CATGAACACCAAAACACAACAACAAA	FE671324.1	-	-	-	-	-	-	-	-	-	-	-	-	-	-	-	-
1727	CATGATGTGATTAGGGTGAACGAGAT	FE671320.1	-	-	-	-	-	-	-	-	-	-	-	-	-	-	-	-
1728	CATGATGACCCGGCCCAAAAAGGCTC	FE671318.1	-	-	-	-	-	-	-	-	-	-	-	-	-	-	-	-
1729	CATGAACAGAAAAAGGGACATAGCAG	FE671317.1	-	-	-	-	-	-	-	-	-	-	-	-	-	-	-	-
1730	CATGCTGAACATTTGATCATTCAACA	FE671316.1	-	-	-	-	-	-	-	-	-	-	-	-	-	-	-	-
1731	CATGGAATCGAGAGCTCCAAGTGGGC	FE671315.1	8e-07	Glycyrrhiza uralensis 26S ribosomal RNA, partial sequence	EF571299	-	-	AW692464	1e-07	0	0	EF571299	0	Glycyrrhiza uralensis 26S ribosomal RNA, partial sequence	-	-	-	Correlated RNA description
1732	CATGGAATTAGTGCTTGATACGAATA	FE671314.1	-	-	-	-	-	-	-	-	-	-	-	-	-	-	-	-
1733	CATGGGGAGAAAATCTCACCTTCTAC	FE671313.1	-	-	-	-	-	-	-	-	-	-	-	-	-	-	-	-
1734	CATGCGAATAACCTGTGTGCGAATAT	FE671311.1	-	Pisum sativum (clone pCLp) nuclear encoded precursor to chloroplast protein mRNA, complete cds	L09547	ATP-dependent Clp protease ATP-binding subunit clpC homolog, chloroplastic precursor	CLPC_PEA	TC124849	1e-07	0	0	L09547	0	Pisum sativum (clone pCLp) nuclear encoded precursor to chloroplast protein mRNA, complete cds	ATP-dependent Clp protease ATP-binding subunit clpC homolog, chloroplastic precursor	CLPC_PEA	ID direct correlation	-
1735	CATGCGCATCAATTCCCATTTCCTCG	FE671310.1	-	-	-	-	-	-	-	-	-	-	-	-	-	-	-	-
1737	CATGGAAACCTCAGCTCTTGAGGCTT	FE671308.1	-	-	-	-	-	-	-	-	-	-	-	-	-	-	-	-
1740	CATGGTTCCCCTTCCTTGTAGACTTG	FE671303.1	-	-	-	-	-	-	-	-	-	-	-	-	-	-	-	-
1742	CATGTTGCGGAGGTGAGTCCTCACTG	FE671299.1	-	-	-	-	-	-	-	-	-	-	-	-	-	-	-	-
1743	CATGCTTAGCAATTCCAGCCAGGTTG	FE671295.1	8e-07	Sesbania rostrata cDNA-AFLP fragment 022BT24M13-328.8 mRNA sequence	EF415873	-	-	-	-	-	-	-	-	-	-	-	-	-
1747	CATGCTACCTTTGATGTAACAAAACC	FE670995.1	-	-	-	-	-	-	-	-	-	-	-	-	-	-	-	-
1748	CATGGTAGGTGGGCTATGCTTGCTAC	FE670994.1	-	-	-	-	-	BF637380	1e-07	0	0	EF571299	1e-113	Glycyrrhiza uralensis 26S ribosomal RNA, partial sequence	-	-	-	-
1751	CATGCACGCATTCGGAAAAATCAAGG	FE670991.1	-	-	-	-	-	-	-	-	-	-	-	-	-	-	-	-
1753	CATGCCATTCTCATCCCAATCGTGGC	FE670989.1	-	-	-	-	-	-	-	-	-	-	-	-	-	-	-	-
1754	CATGACATTCAAAAATCAACAATCTT	FE670988.1	-	-	-	-	-	-	-	-	-	-	-	-	-	-	-	-
1755	CATGACACAACAACGCAGCACCAACG	FE670987.1	-	-	-	-	-	-	-	-	-	-	-	-	-	-	-	-
1757	CATGTTCTTCCCCCAGTGGCCACCTT	FE670985.1	-	-	-	-	-	-	-	-	-	-	-	-	-	-	-	-
1759	CATGTTGATTCCACCTATGATCAATA	FE670980.1	-	-	-	-	-	-	-	-	-	-	-	-	-	-	-	-
1761	CATGTGGTTGTAACATTCTCAATGTG	FE670976.1	-	-	-	-	-	-	-	-	-	-	-	-	-	-	-	-
1762	CATGAGACTGTTACTGTGATGTTGGC	FE670975.1	-	-	-	-	-	-	-	-	-	-	-	-	-	-	-	-
1764	CATGGCTTCGAGAAGAACCTCAACTC	FE670973.1	-	-	-	-	-	-	-	-	-	-	-	-	-	-	-	-
1767	CATGGCGGCGACGTTGGTTCGTACTC	FE670967.1	-	-	-	-	-	-	-	-	-	-	-	-	-	-	-	-
1768	CATGTTACTAGCTTGATATTTTAAAT	FE670966.1	-	-	-	-	-	-	-	-	-	-	-	-	-	-	-	-
1769	CATGAAACTAAGAGAGGTTTACAATG	FE670965.1	-	-	-	-	-	-	-	-	-	-	-	-	-	-	-	-
1771	CATGGACTAAAATTGAAGGCTATCAA	FE670962.1	-	-	-	-	-	-	-	-	-	-	-	-	-	-	-	-
1772	CATGTTGTGATTTCACCTTTGCTTTT	FE670961.1	-	-	-	-	-	-	-	-	-	-	-	-	-	-	-	-
1775	CATGTCATCATTGAGACAAACCGAAC	FE670958.1	8e-07	Trifolium repens mRNA for putative desaturase-like protein (zip gene)	AM282585	Putative desaturase-like protein	Q17UU7_TRIRP	-	-	-	-	-	-	-	-	-	-	-
1777	CATGAAACCGTAAGCTCCCAAGCAGT	FE670954.1	-	-	-	-	-	BG586297	1e-07	0	0	AC145820	0	Cicer arietinum strain WR-315, cultivar clone cpchlor map chloroplast, complete sequence	-	-	-	-
1778	CATGTGGAAGTTTTGGCCACATTATT	FE670953.1	-	-	-	-	-	-	-	-	-	-	-	-	-	-	-	-
1779	CATGTACAAGGTTTGGGTTTCCTAAA	FE670952.1	-	-	-	-	-	-	-	-	-	-	-	-	-	-	-	-
1782	CATGGCTCGACGATCTAACCGATGAC	FE670948.1	-	-	-	-	-	-	-	-	-	-	-	-	-	-	-	-
1783	CATGATTTGACACTATTATTCCAGCT	FE670946.1	-	-	-	-	-	-	-	-	-	-	-	-	-	-	-	-
1785	CATGTAAGCTATGTAAAAATGCGAGG	FE670944.1	-	-	-	-	-	-	-	-	-	-	-	-	-	-	-	-
1786	CATGCTTTTGCTTTTTTCTCAGAAAC	FE670943.1	-	-	-	-	-	-	-	-	-	-	-	-	-	-	-	-
1788	CATGAACATATCCTGCAACGGGGACA	FE670941.1	-	-	-	-	-	-	-	-	-	-	-	-	-	-	-	-
1789	CATGTCCCTCAAAAACTCCATACAGC	FE670939.1	-	-	-	-	-	-	-	-	-	-	-	-	-	-	-	-
1794	CATGATACTTTTCAGAAAGCCCGCCA	FE670931.1	-	-	-	-	-	-	-	-	-	-	-	-	-	-	-	-
1795	CATGAGATCACTGTTACTGGAAATAA	FE670929.1	-	-	-	-	-	-	-	-	-	-	-	-	-	-	-	-
1800	CATGTAATTACATTGGTGAAAATGGG	FE670924.1	-	-	-	-	-	-	-	-	-	-	-	-	-	-	-	-
1802	CATGCTTTTGGTAATGAAATCTTAGC	FE670921.1	-	-	-	-	-	-	-	-	-	-	-	-	-	-	-	-
1803	CATGGTGATTGTTATGGTGAGCACAC	FE670920.1	8e-07	Cicer arietinum mRNA for catalase	AJ131046	Catalase (Fragment); ( EC=1	Q9ZRU4_CICAR	-	-	-	-	-	-	-	-	-	-	-
1807	CATGCAAAGAATCAAAACAATTCGCG	FE670913.1	-	-	-	-	-	-	-	-	-	-	-	-	-	-	-	-
1808	CATGAATTAGTCGATTCCGCCGCCGC	FE670912.1	-	-	-	-	-	-	-	-	-	-	-	-	-	-	-	-
1809	CATGCTAAACCGAAGAGTGAACAGGC	FE670911.1	-	-	-	-	-	-	-	-	-	-	-	-	-	-	-	-
1811	CATGGGTTAGTCGATCCTAAGGGACG	FE670908.1	8e-07	Robinia pseudoacacia 26S ribosomal RNA gene, partial sequence	EU340885	-	-	BE324656	1e-07	0	0	AY747626	0	Medicago truncatula triterpene UDP-glucosyl transferase UGT73K1 mRNA, complete cds	Triterpene UDP-glucosyl transferase UGT73K1	Q5IFH8_MEDTR	no	Uncorrelated annotation
1812	CATGGATCAGCCAAGTGAGTAGCCAA	FE670907.1	-	-	-	-	-	-	-	-	-	-	-	-	-	-	-	-
1813	CATGCATAGTTGTTGACAGGGTCAAA	FE670906.1	-	-	-	-	-	-	-	-	-	-	-	-	-	-	-	-
1815	CATGGTGGTAAGGATATCTATCTAGG	FE670904.1	-	-	-	-	-	-	-	-	-	-	-	-	-	-	-	-
1816	CATGCTTGGTCTTGATGCTGCTGGAA	FE670903.1	-	-	-	-	-	TC121914	7e-06	0	0	EF623858	3e-56	Glycine max cultivar Williams 82 clone 28O17, complete sequence	-	-	-	-
1818	CATGCACTTAGACCTTTCCTCTCTTG	FE670901.1	-	-	-	-	-	TC118442	2e-06	0	0	AF279251	0	Vigna radiata NADPH-protochlorophyllide oxidoreductase (CipPor) mRNA, complete cds; nuclear gene for chloroplast product	NADPH-protochlorophyllide oxidoreductase	Q9LKH8_PHAAU	-	-
1819	CATGAAGGGGGTGGGCTTTCAATGGC	FE670900.1	-	-	-	-	-	-	-	-	-	-	-	-	-	-	-	-
1820	CATGTGAAGAGTAGAGAAGAAGGCGA	FE670898.1	-	-	-	-	-	-	-	-	-	-	-	-	-	-	-	-
1821	CATGTCAATTCCATTACATAATCAAT	FE670897.1	-	-	-	-	-	-	-	-	-	-	-	-	-	-	-	-
1822	CATGTAATCAAGGAGCAGAATATGTA	FE670896.1	-	-	-	-	-	-	-	-	-	-	-	-	-	-	-	-
1823	CATGGAACTATTGGGATGTTTGCCGG	FE670521.1	-	-	-	-	-	-	-	-	-	-	-	-	-	-	-	-
1824	CATGACTAAACAACACGCTAATTGGT	FE670520.1	-	-	-	-	-	-	-	-	-	-	-	-	-	-	-	-
1825	CATGTCCAGGATCAGCAAGGTGAGCA	FE670519.1	-	-	-	-	-	-	-	-	-	-	-	-	-	-	-	-
1828	CATGAAATATTTCTCCATTTGACGCC	FE670514.1	-	-	-	-	-	-	-	-	-	-	-	-	-	-	-	-
1830	CATGAATTTCAGCTCTCCAATTATTT	FE670512.1	-	-	-	-	-	-	-	-	-	-	-	-	-	-	-	-
1832	CATGCGTTTGCTCTCTTTGTTGCTGT	FE670892.1	-	-	-	-	-	-	-	-	-	-	-	-	-	-	-	-
1833	CATGGAAGAGTGGAATGAGAATAGGG	FE670891.1	-	-	-	-	-	-	-	-	-	-	-	-	-	-	-	-
1834	CATGGGATTTGGAAGCTTGAAGGACT	FE670887.1	-	-	-	-	-	-	-	-	-	-	-	-	-	-	-	-
1835	CATGGAACCTTTCCCCTCTTCGGCCT	FE670886.1	8e-07	Glycyrrhiza uralensis 26S ribosomal RNA, partial sequence	EF571299	-	-	BE324656	1e-07	0	0	AY747626	0	Medicago truncatula triterpene UDP-glucosyl transferase UGT73K1 mRNA, complete cds	Triterpene UDP-glucosyl transferase UGT73K1	Q5IFH8_MEDTR	no	Uncorrelated annotation
1836	CATGGAAACAACCATCAACTTTATCC	FE670883.1	-	-	-	-	-	TC126372	1e-07	0	0	AY843524	5e-138	Ammopiptanthus mongolicus clone B54 cold-induced mRNA	-	-	-	-
1839	CATGGACTCAATGTCAACCTTGTGCT	FE670506.1	-	-	-	-	-	-	-	-	-	-	-	-	-	-	-	-
1840	CATGATTTATGTAACACAAAAAGATA	FE670505.1	-	-	-	-	-	-	-	-	-	-	-	-	-	-	-	-
1841	CATGAAGCTGATTCATCCACCGTTAC	FE670504.1	-	-	-	-	-	-	-	-	-	-	-	-	-	-	-	-
1843	CATGGATAGATCACCCAGGTTCGGGT	FE670501.1	-	-	-	-	-	TC125102	1e-07	0	0	X55033	0	P.sativum chloroplast DNA of the single ribosomal RNA operon	-	-	-	-
1844	CATGCATACCAAAAGGATTTGTGCCT	FE670500.1	-	-	-	-	-	-	-	-	-	-	-	-	-	-	-	-
1845	CATGGTACACTGCTGGAGAGCAAGAG	FE670499.1	-	-	-	-	-	TC119047	1e-07	0	0	X81962	0	P.sativum mRNA for type II chlorophyll a/b binding protein	Type II chlorophyll a/b binding protein from photosystem I precursor	Q41038_PEA	-	-
1846	CATGTCATAAAAAGTAAACATAATAC	FE670881.1	-	-	-	-	-	-	-	-	-	-	-	-	-	-	-	-
1848	CATGAGAAACCAAAGTAGCCGTAGCC	FE670875.1	-	-	-	-	-	-	-	-	-	-	-	-	-	-	-	-
1857	CATGACGATATTTTGATGTCAACTTG	FE670490.1	-	-	-	-	-	-	-	-	-	-	-	-	-	-	-	-
1859	CATGTCTTCGAGGCTGATATAGTCTT	FE670487.1	-	-	-	-	-	-	-	-	-	-	-	-	-	-	-	-
1860	CATGCCATAACTTGAATTTGCGACAG	FE670486.1	-	-	-	-	-	-	-	-	-	-	-	-	-	-	-	-
1861	CATGGATCCCTGGTGTTAGAGGGGGT	FE670869.1	-	-	-	-	-	-	-	-	-	-	-	-	-	-	-	-
1862	CATGGCTGGTTTCCCAGTTAGAAAGG	FE670868.1	8e-07	Cicer arietinum mRNA for ribulose 1,5-bisphosphate carboxylase small subunit	AJ131050	Ribulose 1,5-bisphosphate carboxylase small subunit precursor; ( EC=4	Q9ZP07_CICAR	-	-	-	-	-	-	-	-	-	-	-
1863	CATGAGGTGAAATGGAAAGGGAATTA	FE670867.1	-	-	-	-	-	-	-	-	-	-	-	-	-	-	-	-
1866	CATGAATTTCCGTGGGATGCAACTTA	FE670863.1	-	-	-	-	-	-	-	-	-	-	-	-	-	-	-	-
1867	CATGGAGGCCAGTTGTTATGCAAAAT	FE670858.1	-	-	-	-	-	-	-	-	-	-	-	-	-	-	-	-
1868	CATGCCCTTGTTTCTTCACATCACCT	FE670485.1	-	-	-	-	-	-	-	-	-	-	-	-	-	-	-	-
1869	CATGGATCTCACCTTTAGCAAATTGA	FE670484.1	-	-	-	-	-	-	-	-	-	-	-	-	-	-	-	-
1871	CATGACACTGGCAACTCCTACTTTCT	FE670482.1	-	-	-	-	-	-	-	-	-	-	-	-	-	-	-	-
1874	CATGACCTTGCCCAACATTAAGGTTC	FE670478.1	-	-	-	-	-	-	-	-	-	-	-	-	-	-	-	-
1875	CATGAATCTCTGCTCCAAATGTTACG	FE670477.1	-	-	-	-	-	-	-	-	-	-	-	-	-	-	-	-
1876	CATGCATTGCTGCTACTCCAATTGAA	FE670476.1	-	-	-	-	-	-	-	-	-	-	-	-	-	-	-	-
1878	CATGTGTGATAACTAAGACTGATGGG	FE670474.1	-	-	-	-	-	-	-	-	-	-	-	-	-	-	-	-
1879	CATGCGAACCATACGATCAGGTATCT	FE670857.1	-	-	-	-	-	-	-	-	-	-	-	-	-	-	-	-
1880	CATGATTATTAGACTTCTTGTTAAAA	FE670856.1	-	-	-	-	-	-	-	-	-	-	-	-	-	-	-	-
1881	CATGAAGGAAACTTTTACTTGATTTT	FE670850.1	-	-	-	-	-	-	-	-	-	-	-	-	-	-	-	-
1882	CATGGCCACCACCGCAACAGCCGCTG	FE670849.1	-	-	-	-	-	-	-	-	-	-	-	-	-	-	-	-
1883	CATGTAACTCTAAGGATATATTCATC	FE670848.1	-	-	-	-	-	-	-	-	-	-	-	-	-	-	-	-
1884	CATGACAAATGGGAGAAAATAAATGA	FE670847.1	-	-	-	-	-	-	-	-	-	-	-	-	-	-	-	-
1891	CATGGCTATTGGTATTGTTGGTGATG	FE670466.1	8e-07	Phaseolus vulgaris SCAR-RADP fragment SG14	AJ879499	-	-	-	-	-	-	-	-	-	-	-	-	-
1895	CATGATGCTGGGAAGAGGAGGAACGT	FE670842.1	-	-	-	-	-	-	-	-	-	-	-	-	-	-	-	-
1897	CATGGATTTGAGAACAACAAATGGAG	FE670838.1	-	-	-	-	-	-	-	-	-	-	-	-	-	-	-	-
1899	CATGCTATGCCAGCTATTTTCGTGGG	FE670835.1	-	-	-	-	-	-	-	-	-	-	-	-	-	-	-	-
1900	CATGGTTCGTCTAATGGTGCACGCGT	FE670461.1	-	-	-	-	-	-	-	-	-	-	-	-	-	-	-	-
1901	CATGCTCAAGGTATCCTTGCTATATG	FE670460.1	-	-	-	-	-	-	-	-	-	-	-	-	-	-	-	-
1903	CATGAATCACAACATATCTTCCTTTC	FE670458.1	-	-	-	-	-	-	-	-	-	-	-	-	-	-	-	-
1904	CATGGTTCCTCCTCTGAGCCTCAACA	FE670457.1	-	-	-	-	-	-	-	-	-	-	-	-	-	-	-	-
1906	CATGTTTCAACAGCAGCAGCAGCAAA	FE670455.1	-	-	-	-	-	-	-	-	-	-	-	-	-	-	-	-
1907	CATGAAGTACATTTCAATCGTAAGGA	FE670454.1	-	-	-	-	-	-	-	-	-	-	-	-	-	-	-	-
1910	CATGCCCGCTTCGGTAATAAATGGGC	FE670451.1	-	-	-	-	-	-	-	-	-	-	-	-	-	-	-	-
1911	CATGTGTTTCGGACAAGAAATGTTAG	FE670450.1	-	-	-	-	-	-	-	-	-	-	-	-	-	-	-	-
1913	CATGTAATTCTTGAGGTCGACAGGGG	FE670832.1	-	-	-	-	-	-	-	-	-	-	-	-	-	-	-	-
1916	CATGTNGTTCAGTGATATCATTCAAG	FE670829.1	-	-	-	-	-	-	-	-	-	-	-	-	-	-	-	-
1917	CATGATGTGTGTGGAGGGTANAAAAG	FE670826.1	-	-	-	-	-	-	-	-	-	-	-	-	-	-	-	-
1918	CATGTCCAGTGAAGTAGCCTGCCAAG	FE670824.1	-	-	-	-	-	-	-	-	-	-	-	-	-	-	-	-
1920	CATGTTATCCAGTGGGTACGAAGGTG	FE670822.1	-	-	-	-	-	-	-	-	-	-	-	-	-	-	-	-
1922	CATGGTCCAGTTTCCCTCCGGAATGT	FE670447.1	-	-	-	-	-	-	-	-	-	-	-	-	-	-	-	-
1923	CATGATCCTACTACGCCGAACCGACA	FE670446.1	-	-	-	-	-	-	-	-	-	-	-	-	-	-	-	-
1925	CATGAACTTAGTTTGACCACTGGAAA	FE670443.1	-	-	-	-	-	-	-	-	-	-	-	-	-	-	-	-
1928	CATGTAATTCGACCGTTGTTCCTTCC	FE670440.1	-	-	-	-	-	-	-	-	-	-	-	-	-	-	-	-
1929	CATGAGATCAATGCACTTGAGCAGCA	FE670439.1	-	-	-	-	-	TC125057	1e-07	0	0	U31565	0	Pisum sativum reversibly glycosylatable polypeptide (RGP1) mRNA, complete cds	Alpha-1,4-glucan-protein synthase	UPTG_PEA	-	-
1930	CATGAATAAAAATATAAATAAATAAA	FE670819.1	-	-	-	-	-	-	-	-	-	-	-	-	-	-	-	-
1931	CATGAAGACACATCATACTTAAGATC	FE670818.1	-	-	-	-	-	-	-	-	-	-	-	-	-	-	-	-
1933	CATGATTTCCTAATCTGTCATCTGTC	FE670436.1	-	-	-	-	-	-	-	-	-	-	-	-	-	-	-	-
1934	CATGAAGTTGGTGCAGGTGTGTTGCA	FE670435.1	-	-	-	-	-	-	-	-	-	-	-	-	-	-	-	-
1935	CATGTCAAATTTCAAACACTAGCCAT	FE670434.1	-	-	-	-	-	-	-	-	-	-	-	-	-	-	-	-
1939	CATGTGATTACGTAGAATTCTTCAAC	FE670426.1	-	-	-	-	-	-	-	-	-	-	-	-	-	-	-	-
1941	CATGAAACTCCAAAGGAAAATGTTGC	FE670147.1	-	-	-	-	-	-	-	-	-	-	-	-	-	-	-	-
1942	CATGATGAAGCTGAATCTCTTTATGT	FE670145.1	-	-	-	-	-	-	-	-	-	-	-	-	-	-	-	-
1943	CATGTAAGGCATCGACAATGATCCTT	FE670144.1	8e-07	Trifolium pratense isolate M3 18S ribosomal RNA gene, partial sequence; internal transcribed spacer 1, 5.8S ribosomal RNA gene, and internal transcribed spacer 2, complete sequence; and 26S ribosomal RNA gene, partial sequence	EU348780	-	-	TC119615	1e-07	0	0	AJ577394	0	Cicer arietinum 18S rRNA gene, 5.8S rRNA gene, IGS, ITS1 and ITS2, clone CanrDNA	-	-	-	Correlated RNA description
1944	CATGCTTGAAGGAAGAATAAGCATTC	FE670138.1	-	-	-	-	-	-	-	-	-	-	-	-	-	-	-	-
1945	CATGATGACCACCATCTATTTTAATA	FE670137.1	-	-	-	-	-	-	-	-	-	-	-	-	-	-	-	-
1946	CATGTTACAACTTTGTTCCTCGTCTA	FE670136.1	-	-	-	-	-	-	-	-	-	-	-	-	-	-	-	-
1947	CATGCATTGTTGTTAACAGGGTCAAA	FE670135.1	-	-	-	-	-	-	-	-	-	-	-	-	-	-	-	-
1950	CATGGATCCTCCTCAGATCTGTCAAC	FE670132.1	-	-	-	-	-	-	-	-	-	-	-	-	-	-	-	-
1952	CATGATCCTAGAGTACAAGTGAAGCA	FE670127.1	1e-05	Glycine max myo-inositol-1-phosphate synthase (MIPS3) gene, complete cds	DQ323907	Myo-inositol-1-phosphate synthase	Q2MJR4_SOYBN	-	-	-	-	-	-	-	-	-	-	-
1953	CATGGTGAACATATCTTTCCCAACTT	FE670126.1	-	-	-	-	-	-	-	-	-	-	-	-	-	-	-	-
1955	CATGGTCAAGAAACTTATCCGCAATG	FE670123.1	-	-	-	-	-	-	-	-	-	-	-	-	-	-	-	-
1956	CATGCGTCGTACTGTGAAGAGTACTC	FE670122.1	-	-	-	-	-	-	-	-	-	-	-	-	-	-	-	-
1957	CATGAGTTACCCTCACAACCATAGGC	FE670121.1	-	-	-	-	-	-	-	-	-	-	-	-	-	-	-	-
1958	CATGCACCTTTTAGTTTGTTTCGGAG	FE670120.1	8e-07	Arachis hypogaea cultivar JL24 16S ribosomal RNA gene, partial sequence; mitochondrial	EU982414	-	-	-	-	-	-	-	-	-	-	-	-	-
1959	CATGACCGTTTTGTGGATGCCATTAC	FE670118.1	-	-	-	-	-	-	-	-	-	-	-	-	-	-	-	-
1961	CATGTTGTATTGCCAAAACAGAAAAA	FE670116.1	-	-	-	-	-	-	-	-	-	-	-	-	-	-	-	-
1962	CATGTGCATCTTCATCAACTTCAACC	FE670115.1	-	-	-	-	-	-	-	-	-	-	-	-	-	-	-	-
1967	CATGGGAAAAGTACCTTTCTCTAACT	FE670109.1	-	-	-	-	-	-	-	-	-	-	-	-	-	-	-	-
1968	CATGCATAAAGGATTCTGATTTCAAG	FE670106.1	-	-	-	-	-	-	-	-	-	-	-	-	-	-	-	-
1969	CATGGCTAAGGGTCCAGGTCTCTACA	FE670105.1	-	-	-	-	-	-	-	-	-	-	-	-	-	-	-	-
1970	CATGCAGAGTCTTTTCACATTATCAT	FE670104.1	-	-	-	-	-	-	-	-	-	-	-	-	-	-	-	-
1974	CATGGTTATATTATTTATTATGTCTA	FE670099.1	-	-	-	-	-	-	-	-	-	-	-	-	-	-	-	-
1975	CATGGCATTTACTTCCCTTGGGCTCG	FE670098.1	-	-	-	-	-	-	-	-	-	-	-	-	-	-	-	-
1977	CATGGGCTCTGTATGTTCGACGTCTT	FE670095.1	-	-	-	-	-	-	-	-	-	-	-	-	-	-	-	-
1978	CATGCACCAATGTCAATTGCAATTGT	FE670093.1	-	-	-	-	-	-	-	-	-	-	-	-	-	-	-	-
1979	CATGTCCGAACCAATCAGGCGAAGTG	FE670091.1	-	-	-	-	-	-	-	-	-	-	-	-	-	-	-	-
1980	CATGGCGACACCACACGGTCTAGTTG	FE670089.1	-	-	-	-	-	-	-	-	-	-	-	-	-	-	-	-
1983	CATGTTCTTCTTTGCGACTTATTTGA	FE670086.1	-	-	-	-	-	-	-	-	-	-	-	-	-	-	-	-
1984	CATGGTGTCTAGTATCGCATCCTAGA	FE670085.1	-	-	-	-	-	-	-	-	-	-	-	-	-	-	-	-
1987	CATGCGTTCGCACCCTAGGGCAAAAT	FE670082.1	-	-	-	-	-	-	-	-	-	-	-	-	-	-	-	-
1988	CATGTTGGGAGATTCCAACCGCTTAT	FE670081.1	-	-	-	-	-	-	-	-	-	-	-	-	-	-	-	-
1989	CATGGCTGCAAAGTATTGCAAGGAAA	FE670078.1	-	-	-	-	-	-	-	-	-	-	-	-	-	-	-	-
1990	CATGGATTTGCTCACTCCACAAGCTG	FE670076.1	-	-	-	-	-	TC117294	5e-07	0	0	AF525698	0	Dioclea guianensis 18S ribosomal RNA gene, complete sequence	-	-	-	-
1991	CATGCTTTTGGATGGATGGTAAAAAT	FE670074.1	-	-	-	-	-	-	-	-	-	-	-	-	-	-	-	-
1992	CATGGGTGTGATGAGACCGGACCTGG	FE670073.1	-	-	-	-	-	-	-	-	-	-	-	-	-	-	-	-
1994	CATGAGTGCCATTTCCAACACAAACA	FE670071.1	-	-	-	-	-	-	-	-	-	-	-	-	-	-	-	-
1996	CATGGATACCAATAAAAGTAGGGAGG	FE670067.1	-	-	-	-	-	-	-	-	-	-	-	-	-	-	-	-
1997	CATGACGGCAAAAGAAAATGCGAGAC	FE670066.1	-	-	-	-	-	-	-	-	-	-	-	-	-	-	-	-
1998	CATGGCTAATCTAGCGTTCTTAAGTT	FE670065.1	-	-	-	-	-	-	-	-	-	-	-	-	-	-	-	-
2002	CATGCACGACAGCGACCGTTACGATC	FE670058.1	-	-	-	-	-	DY618464	5e-07	0	0	AF186020	0	Vicia faba abscisic acid-activated protein kinase (AAPK) mRNA, complete cds	Abscisic acid-activated protein kinase	Q9M6N2_VICFA	-	-
2003	CATGGGTGTCAAAGGTTTTGTTGAAA	FE670057.1	-	-	-	-	-	TC114462	5e-07	0	0	AB236842	0	Trifolium pratense RNA for putative mitochondrial dicarboxylate carrier protein, complete cds, clone: C331	Putative mitochondrial dicarboxylate carrier protein	Q2PEQ8_TRIPR	-	-
2005	CATGCGACGAGTGGGCTTGATGTGAC	FE669765.1	-	-	-	-	-	-	-	-	-	-	-	-	-	-	-	-
2006	CATGAAGTTCCTGATCCAACGGCTGT	FE669764.1	-	-	-	-	-	-	-	-	-	-	-	-	-	-	-	-
2007	CATGTCGATTGCAAAGCCGCGCTCCG	FE669763.1	-	-	-	-	-	-	-	-	-	-	-	-	-	-	-	-
2008	CATGACAAGTAGTATAGGAGATTGAC	FE669762.1	-	-	-	-	-	-	-	-	-	-	-	-	-	-	-	-
2009	CATGAGTAAGGAAGGTCAATGTTTTC	FE669759.1	-	-	-	-	-	-	-	-	-	-	-	-	-	-	-	-
2012	CATGAAGGAGTCAAATCAGTCTTGTA	FE669754.1	-	-	-	-	-	TC129841	7e-06	0	0	AF372517	0	Medicago sativa 16S ribosomal RNA gene, partial sequence; and tRNA-Ile and tRNA-Ala genes, complete sequence; chloroplast genes for chloroplast products	-	-	-	-
2015	CATGGTATGGTCCAGACAGAGTAAAA	FE669750.1	-	-	-	-	-	-	-	-	-	-	-	-	-	-	-	-
2019	CATGATTGCCACTTAAGAATTTTTCA	FE669745.1	-	-	-	-	-	-	-	-	-	-	-	-	-	-	-	-
2020	CATGTGCAGCTTGATCCACACTTGCA	FE669744.1	8e-07	C.arietinum mRNA for metallothionein (clone: CanMT-1)	X95708	Metallothionein-like protein 1; ( Short=MT-1)	MT1_CICAR	-	-	-	-	-	-	-	-	-	-	-
2022	CATGAGGGGCTTCCACAAAACAAGGA	FE669741.1	-	-	-	-	-	-	-	-	-	-	-	-	-	-	-	-
2023	CATGCTAGTATAGAAGCAGTCACAGG	FE669740.1	-	-	-	-	-	-	-	-	-	-	-	-	-	-	-	-
2025	CATGAAAACCGGTCCGAACCTGATGG	FE669738.1	-	-	-	-	-	-	-	-	-	-	-	-	-	-	-	-
2027	CATGATGGATTAAAAAAACCATAAAT	FE669735.1	-	-	-	-	-	-	-	-	-	-	-	-	-	-	-	-
2029	CATGCTTTTCCAGCAGCCTTGATGAC	FE669732.1	-	-	-	-	-	-	-	-	-	-	-	-	-	-	-	-
2030	CATGTAGGAGAGTGCAGTGGAATGAT	FE669731.1	-	-	-	-	-	-	-	-	-	-	-	-	-	-	-	-
2033	CATGTCGAAAAATCCAGTTTGTGTGT	FE669723.1	-	-	-	-	-	-	-	-	-	-	-	-	-	-	-	-
2034	CATGATGTTGAAGTCGAGCTTAATAA	FE669722.1	-	-	-	-	-	-	-	-	-	-	-	-	-	-	-	-
2035	CATGCTCAGGCAGTGACTCCTTCTGC	FE669721.1	-	-	-	-	-	-	-	-	-	-	-	-	-	-	-	-
2036	CATGCGTGTGAACCGAGGTTACTATC	FE669720.1	-	-	-	-	-	-	-	-	-	-	-	-	-	-	-	-
2039	CATGTGTCTTGAGCCATTGCTCGGCG	FE669717.1	8e-07	Cicer arietinum mRNA for plastoquinol-plastocyanin reductase, partial cds	AB025003	Plastoquinol-plastocyanin reductase (Fragment)	Q9SXU4_CICAR	-	-	-	-	-	-	-	-	-	-	-
2040	CATGACAAGTTCCCAACAAAAAGCTT	FE669715.1	-	-	-	-	-	-	-	-	-	-	-	-	-	-	-	-
2041	CATGCTTTGAAAACCACTTCTCATTA	FE669714.1	-	-	-	-	-	-	-	-	-	-	-	-	-	-	-	-
2044	CATGTTCTAGGCAACATCTGACCACC	FE669710.1	-	-	-	-	-	-	-	-	-	-	-	-	-	-	-	-
2045	CATGGTTTGTGGAGGACCACATCATT	FE669706.1	-	-	-	-	-	-	-	-	-	-	-	-	-	-	-	-
2046	CATGCTCGGAGATCAGCACAGCACTG	FE669705.1	-	-	-	-	-	-	-	-	-	-	-	-	-	-	-	-
2047	CATGTAGACGCCTGCCTTTGAAAATG	FE669704.1	-	-	-	-	-	-	-	-	-	-	-	-	-	-	-	-
2048	CATGAGTAAACTTCTCGCTAAACCTA	FE669702.1	-	-	-	-	-	-	-	-	-	-	-	-	-	-	-	-
2049	CATGCATCATATACCCAATTAAGCAA	FE669701.1	-	-	-	-	-	-	-	-	-	-	-	-	-	-	-	-
2052	CATGTCCAATATGTTGGTGGTTACCT	FE669697.1	-	-	-	-	-	-	-	-	-	-	-	-	-	-	-	-
2054	CATGACCACCGTCCTGCTGTCTTAAT	FE669695.1	8e-07	Robinia pseudoacacia 26S ribosomal RNA gene, partial sequence	EU340885	-	-	AW692464	1e-07	0	0	EF571299	0	Glycyrrhiza uralensis 26S ribosomal RNA, partial sequence	-	-	-	Correlated RNA description
2056	CATGTGTTGCTTACCCTCGTTCCGAT	FE669693.1	-	-	-	-	-	TC131023	5e-07	0	0	AB049715	8e-10	Pisum sativum ssa-4 mRNA for putative senescence-associated protein, complete cds	Putative senescence-associated protein	Q9AVI0_PEA	-	-
2063	CATGGACAAAGTTGTATGTCACATTG	FE669685.1	-	-	-	-	-	-	-	-	-	-	-	-	-	-	-	-
2064	CATGAATCGGCCCACTTCCGTTTTTT	FE669684.1	-	-	-	-	-	-	-	-	-	-	-	-	-	-	-	-
2065	CATGGTTTTTTCTTCCTCCAATTGGC	FE669683.1	-	-	-	-	-	-	-	-	-	-	-	-	-	-	-	-
2069	CATGGATCCACCAGTACCGGCACAAA	FE669678.1	-	-	-	-	-	-	-	-	-	-	-	-	-	-	-	-
2072	CATGACTTGTTGTCTCTGATACAACA	FE669675.1	-	-	-	-	-	-	-	-	-	-	-	-	-	-	-	-
2074	CATGGAGTAAAACTGGTGGTTTAGGA	FE669673.1	5e-05	Pisum sativum mRNA for granule-bound starch synthase (gbssIb gene)	AJ345045	Granule-bound starch synthase precursor; ( EC=2	Q93YB1_PEA	-	-	-	-	-	-	-	-	-	-	-
2075	CATGATATTGAAAATCGGTAGCTGTT	FE669672.1	-	-	-	-	-	-	-	-	-	-	-	-	-	-	-	-
2076	CATGTCATATTTGTACCCGCTGTCCA	FE669670.1	8e-07	Cicer arietinum mRNA for 20S proteasome beta subunit	AJ011383	20S proteasome beta subunit; ( EC=3	Q9ZRY9_CICAR	TC114871	1e-07	0	0	AJ011383	0	Cicer arietinum mRNA for 20S proteasome beta subunit	20S proteasome beta subunit; ( EC=3.4.99.46)	Q9ZRY9_CICAR	ID direct correlation	-
2077	CATGAAGCTTGTCTTCCAATTCCAGT	FE670424.1	-	-	-	-	-	-	-	-	-	-	-	-	-	-	-	-
2078	CATGATTCCAAATTGATGTCGTCCAT	FE670423.1	-	-	-	-	-	-	-	-	-	-	-	-	-	-	-	-
2080	CATGGATCAAAAATGCGCGGAAACTT	FE670421.1	-	-	-	-	-	-	-	-	-	-	-	-	-	-	-	-
2083	CATGAAAGGAAAAAACTACTTGGTCT	FE670415.1	-	-	-	-	-	-	-	-	-	-	-	-	-	-	-	-
2086	CATGGTTCCTCTATGCAGTTCCCTTA	FE670052.1	-	-	-	-	-	-	-	-	-	-	-	-	-	-	-	-
2087	CATGGACAAATCCCCTCATTCCTATC	FE670051.1	-	-	-	-	-	-	-	-	-	-	-	-	-	-	-	-
2088	CATGGAATCAATTTCTAGAGCCGTGT	FE670050.1	-	-	-	-	-	-	-	-	-	-	-	-	-	-	-	-
2089	CATGGATAGTACCATTAGGAAGAAGA	FE670048.1	-	-	-	-	-	-	-	-	-	-	-	-	-	-	-	-
2090	CATGGCTTGATGGCAGTCTACCTGAA	FE670047.1	-	-	-	-	-	-	-	-	-	-	-	-	-	-	-	-
2091	CATGAATTGTATATAAGAAAACAATA	FE670045.1	-	-	-	-	-	-	-	-	-	-	-	-	-	-	-	-
2092	CATGCGCAGATCTGTTAGTTAGAGTA	FE670044.1	-	-	-	-	-	-	-	-	-	-	-	-	-	-	-	-
2094	CATGGGCACATTGGAGCATCTTTCAT	FE670042.1	-	-	-	-	-	-	-	-	-	-	-	-	-	-	-	-
2096	CATGTTCTATTTCACTCCCCGATGGG	FE670412.1	-	-	-	-	-	-	-	-	-	-	-	-	-	-	-	-
2097	CATGAGAACGAGAATGATACGGTCAC	FE670411.1	-	-	-	-	-	-	-	-	-	-	-	-	-	-	-	-
2102	CATGAGACCTTTAAGGACAGGGTATA	FE670403.1	-	-	-	-	-	-	-	-	-	-	-	-	-	-	-	-
2103	CATGCCTGTGGTATTATAAGGCATTA	FE670402.1	-	-	-	-	-	-	-	-	-	-	-	-	-	-	-	-
2104	CATGAAAACGAGAAACACCAAAGATG	FE670040.1	-	-	-	-	-	-	-	-	-	-	-	-	-	-	-	-
2105	CATGCAATTAGACTACAGTGATGCTC	FE670039.1	-	-	-	-	-	-	-	-	-	-	-	-	-	-	-	-
2107	CATGCTCGCTCGCGGCAACGCAAACC	FE670034.1	-	-	-	-	-	-	-	-	-	-	-	-	-	-	-	-
2108	CATGGAGGTTCCTGCTAAGAAGGCTT	FE670400.1	-	-	-	-	-	-	-	-	-	-	-	-	-	-	-	-
2110	CATGATTTCATCTGTGTAAAGATTAG	FE670395.1	-	-	-	-	-	-	-	-	-	-	-	-	-	-	-	-
2111	CATGACCAGACTGGATGCGAAACACC	FE670394.1	-	-	-	-	-	-	-	-	-	-	-	-	-	-	-	-
2112	CATGCACGTCTGACAGGAAATGGTGT	FE670393.1	-	-	-	-	-	-	-	-	-	-	-	-	-	-	-	-
2113	CATGCTGCGATTGGCATTCACACACA	FE670392.1	-	-	-	-	-	-	-	-	-	-	-	-	-	-	-	-
2114	CATGCATCATACCATTAACAAAAGAC	FE670029.1	-	-	-	-	-	-	-	-	-	-	-	-	-	-	-	-
2115	CATGGTACGGTCCAGACCGTGTGAAG	FE670027.1	8e-07	Cicer arietinum mRNA for chlorophyll a/b binding protein	AJ131044	Chlorophyll a/b binding protein precursor	Q9ZP08_CICAR	TC116075	1e-07	0	0	AF072931	3e-171	Medicago sativa chlorophyll a/b binding protein (CARCAB1) mRNA, complete cds	Chlorophyll a/b binding protein	O81391_MEDSA	no	Correlated protein name
2116	CATGGCTGCAATGAACTCAAGTGTAT	FE670024.1	-	-	-	-	-	TC120935	1e-07	0	0	AF492824	5e-73	Phaseolus vulgaris photosystem I-N subunit (PSI-N) mRNA, complete cds	Photosystem I-N subunit	Q84U30_PHAVU	-	-
2117	CATGTGAGGATTATAAGCTCTATAAG	FE670023.1	-	-	-	-	-	-	-	-	-	-	-	-	-	-	-	-
2119	CATGGTAGCCAATGCAAATATTAGGT	FE670020.1	-	-	-	-	-	-	-	-	-	-	-	-	-	-	-	-
2123	CATGAGGGCGCTCTCGCGCGCTCTCG	FE670387.1	-	-	-	-	-	-	-	-	-	-	-	-	-	-	-	-
2124	CATGAAACCCCTGAAACGTGCGTCTC	FE670384.1	-	-	-	-	-	-	-	-	-	-	-	-	-	-	-	-
2125	CATGGCTTCAAGTGCGACAACAGAGG	FE670383.1	-	-	-	-	-	-	-	-	-	-	-	-	-	-	-	-
2126	CATGTATTCAATTCGAAGTGTCGGTA	FE670382.1	-	-	-	-	-	-	-	-	-	-	-	-	-	-	-	-
2128	CATGGGGTGGAATCCAGTGGGAGAAA	FE670016.1	-	-	-	-	-	-	-	-	-	-	-	-	-	-	-	-
2129	CATGTCAGCAAGTCTCAACTGCAAGG	FE670015.1	-	-	-	-	-	-	-	-	-	-	-	-	-	-	-	-
2131	CATGTTACCGCTAGCTTGATCTGACC	FE670011.1	-	-	-	-	-	-	-	-	-	-	-	-	-	-	-	-
2134	CATGCATCCTTTGGAGATATTCCTTT	FE670376.1	-	-	-	-	-	-	-	-	-	-	-	-	-	-	-	-
2135	CATGCCTGAGGAATATTGTGTGTAAC	FE670373.1	-	-	-	-	-	-	-	-	-	-	-	-	-	-	-	-
2136	CATGAGAGCAGCAAAATCAAAGACAT	FE670371.1	-	-	-	-	-	-	-	-	-	-	-	-	-	-	-	-
2137	CATGTGCTTCGACACAATATGATGGA	FE670370.1	-	-	-	-	-	-	-	-	-	-	-	-	-	-	-	-
2139	CATGAACAAGGTCATAAGTCAAACTT	FE670366.1	-	-	-	-	-	-	-	-	-	-	-	-	-	-	-	-
2141	CATGATGAATCGGTTTTTGCCGGTTG	FE670003.1	-	-	-	-	-	-	-	-	-	-	-	-	-	-	-	-
2145	CATGAATCTGTCAATAATGTTGTTGA	FE669998.1	-	-	-	-	-	-	-	-	-	-	-	-	-	-	-	-
2146	CATGGCTAATCTCGCGTTCTTAAATT	FE669997.1	-	-	-	-	-	-	-	-	-	-	-	-	-	-	-	-
2148	CATGTACAAACCAAAAAATTTCTTGT	FE669995.1	-	-	-	-	-	-	-	-	-	-	-	-	-	-	-	-
2151	CATGCCAGAGAAGGGTGACTGGCGTA	FE670364.1	-	-	-	-	-	-	-	-	-	-	-	-	-	-	-	-
2152	CATGCTTCAACTGTACGACGTAAGGC	FE670363.1	-	-	-	-	-	-	-	-	-	-	-	-	-	-	-	-
2155	CATGGCCAACCGACAATTCTTGATTT	FE670360.1	-	-	-	-	-	-	-	-	-	-	-	-	-	-	-	-
2156	CATGTCGTCCATACGAGAGGGAGCGA	FE670359.1	-	-	-	-	-	-	-	-	-	-	-	-	-	-	-	-
2157	CATGAGCTGCAGATGCTGCACGCGCA	FE670355.1	-	-	-	-	-	-	-	-	-	-	-	-	-	-	-	-
2160	CATGGAGCGGACAAAGGCTTTGAAGA	FE669987.1	-	-	-	-	-	-	-	-	-	-	-	-	-	-	-	-
2161	CATGAAGTTCAAGCTGAAGACCAAGG	FE669986.1	-	-	-	-	-	-	-	-	-	-	-	-	-	-	-	-
2163	CATGTAGGAACAAGGTTCAAGTCTAC	FE669982.1	8e-07	-	-	-	-	-	-	-	-	-	-	-	-	-	-	-
2164	CATGATACCAGGGACAGAAGGGGGAA	FE670353.1	-	-	-	-	-	-	-	-	-	-	-	-	-	-	-	-
2166	CATGCTTGAATTCATTCTTGGTGGAA	FE670348.1	-	-	-	-	-	-	-	-	-	-	-	-	-	-	-	-
2167	CATGTTACCATATTCCAAGAGTTTCT	FE670347.1	-	-	-	-	-	-	-	-	-	-	-	-	-	-	-	-
2168	CATGCTCCTCACCTGGAACTTCCACA	FE670346.1	-	-	-	-	-	-	-	-	-	-	-	-	-	-	-	-
2169	CATGAAACGACAACTAAAACAAAAAG	FE670343.1	-	-	-	-	-	-	-	-	-	-	-	-	-	-	-	-
2173	CATGCGGCGCACTCCCCTTGCTCCTC	FE669979.1	-	-	-	-	-	-	-	-	-	-	-	-	-	-	-	-
2174	CATGGGTGTCAAAGGTATTGTTGAAG	FE669977.1	-	-	-	-	-	-	-	-	-	-	-	-	-	-	-	-
2177	CATGGAGGGCTTCATTGTCCTTTTCA	FE669974.1	-	-	-	-	-	-	-	-	-	-	-	-	-	-	-	-
2179	CATGGCTCTCTCTTCACCAACCTTAG	FE669972.1	8e-07	Cicer arietinum mRNA for chlorophyll a/b binding protein	AJ131044	Chlorophyll a/b binding protein precursor	Q9ZP08_CICAR	BQ151210	2e-06	0	0	AF072931	0	Medicago sativa chlorophyll a/b binding protein (CARCAB1) mRNA, complete cds	Chlorophyll a/b binding protein	O81391_MEDSA	no	Correlated protein name
2180	CATGAGGAATGATCCTCCTCCTACCG	FE669971.1	-	-	-	-	-	-	-	-	-	-	-	-	-	-	-	-
2182	CATGGCAGCAATGAACTCAAGTGTAT	FE670341.1	-	-	-	-	-	-	-	-	-	-	-	-	-	-	-	-
2183	CATGAGGGATTTGGAAGAGTTGTTGT	FE670340.1	-	-	-	-	-	-	-	-	-	-	-	-	-	-	-	-
2185	CATGCCTTGTTGTTGACCGGGTCACA	FE670337.1	-	-	-	-	-	-	-	-	-	-	-	-	-	-	-	-
2187	CATGAATGGGCCTCCTCCTCAACAGT	FE670334.1	-	-	-	-	-	-	-	-	-	-	-	-	-	-	-	-
2188	CATGTTGGGTGTTGCAGGGATGTTAC	FE670333.1	3e-06	Pisum sativum PSI light-harvesting antenna chlorophyll a/b-binding protein (lhcA-P4) mRNA, complete cds	AF002248	Chlorophyll a-b binding protein P4, chloroplastic precursor; (AltName: Full=LHCI type III CAB-P4)	CB24_PEA	-	-	-	-	-	-	-	-	-	-	-
2189	CATGGATTGAAAAATGATTCTGAACC	FE670332.1	-	-	-	-	-	-	-	-	-	-	-	-	-	-	-	-
2191	CATGTCTAGCAATATGTATAATAAAA	FE669969.1	-	-	-	-	-	-	-	-	-	-	-	-	-	-	-	-
2193	CATGTATGGGGGCTGACGCCTGCCCA	FE669966.1	-	-	-	-	-	-	-	-	-	-	-	-	-	-	-	-
2195	CATGGTGATTTGTTTTGGTGTGTCAC	FE669964.1	-	-	-	-	-	-	-	-	-	-	-	-	-	-	-	-
2197	CATGTGGTGCAGCAATGTCAAGCCCA	FE669962.1	-	-	-	-	-	-	-	-	-	-	-	-	-	-	-	-
2198	CATGTCTTTAAGATCGCTCAAACATA	FE669958.1	-	-	-	-	-	-	-	-	-	-	-	-	-	-	-	-
2199	CATGGATGCTCCGGTGAAGGCTCCTC	FE670808.1	8e-07	Cicer arietinum partial mRNA for tonoplast intrinsic protein (tip gene)	AJ489613	Tonoplast intrinsic protein (Fragment)	Q8L5G0_CICAR	ES611800	2e-06	0	0	AJ251652	0	Medicago truncatula mRNA for aquaporin (aqp1 gene)	Probable aquaporin TIP-type; (AltName: Full=MtAQP1)	TIP1_MEDTR	no	Correlated protein name
2200	CATGCAATAACAAAAGCGTTTTCGTT	FE670807.1	-	-	-	-	-	-	-	-	-	-	-	-	-	-	-	-
2203	CATGTTTTCCCTTTGCAACAAAATTT	FE670804.1	-	-	-	-	-	-	-	-	-	-	-	-	-	-	-	-
2204	CATGAATCACCTCATATGCCTGATAT	FE670802.1	-	-	-	-	-	-	-	-	-	-	-	-	-	-	-	-
2205	CATGGGGCTTAACTGACGACCCTGAA	FE670801.1	-	-	-	-	-	-	-	-	-	-	-	-	-	-	-	-
2206	CATGCTTATCAAATATCAACTTTATC	FE670800.1	-	-	-	-	-	-	-	-	-	-	-	-	-	-	-	-
2211	CATGGTTATCTGGTACAATATCAAAG	FE670794.1	-	-	-	-	-	-	-	-	-	-	-	-	-	-	-	-
2212	CATGAATTCTATATATCTACTATTCA	FE670793.1	-	-	-	-	-	-	-	-	-	-	-	-	-	-	-	-
2213	CATGCCTATTGCTGCTCGCTTAAAGA	FE670791.1	8e-07	Glycine max plasma membrane Ca2+-ATPase (SCA1) mRNA, complete cds	AF195028	Plasma membrane Ca2+-ATPase	Q9FVE8_SOYBN	BG647796	5e-07	0	0	AY103493	0	Medicago truncatula type IIB calcium ATPase MCA5 (MCA5) mRNA, complete cds	Type IIB calcium ATPase MCA5	Q8L8A0_MEDTR	no	Correlated protein name
2214	CATGCTTTATCCTTTAAAATAGTGTT	FE670790.1	-	-	-	-	-	-	-	-	-	-	-	-	-	-	-	-
2215	CATGTCTGTGAAGATGCGGACTACCT	FE670789.1	-	-	-	-	-	-	-	-	-	-	-	-	-	-	-	-
2216	CATGTTTGGAGAGGGCAGAGTGGAGG	FE670784.1	-	-	-	-	-	-	-	-	-	-	-	-	-	-	-	-
2219	CATGTTAGATATTACTGTCATTGCAA	FE670779.1	-	-	-	-	-	-	-	-	-	-	-	-	-	-	-	-
2221	CATGAATCAGATTTGGGTTGCCCAAA	FE670777.1	-	-	-	-	-	-	-	-	-	-	-	-	-	-	-	-
2222	CATGCACGTGCAATTAGAGACGTAGA	FE670776.1	-	-	-	-	-	-	-	-	-	-	-	-	-	-	-	-
2223	CATGCTAGAGATTTTATGGAGGCTGC	FE670775.1	-	-	-	-	-	-	-	-	-	-	-	-	-	-	-	-
2225	CATGCCCCCACATATACCTCGATATT	FE670773.1	-	-	-	-	-	-	-	-	-	-	-	-	-	-	-	-
2226	CATGTCTGTACATATTTCATTTTACT	FE670771.1	-	-	-	-	-	-	-	-	-	-	-	-	-	-	-	-
2227	CATGAAGTCACTTTTGATTAATAGTT	FE670769.1	-	-	-	-	-	-	-	-	-	-	-	-	-	-	-	-
2228	CATGGCCAATTCCATCATTGTCATCC	FE670768.1	-	-	-	-	-	-	-	-	-	-	-	-	-	-	-	-
2229	CATGCCCAGGAACATCTTGGAGAGGT	FE670767.1	-	-	-	-	-	-	-	-	-	-	-	-	-	-	-	-
2231	CATGGAACATTTGATACTAAAGGTGG	FE670763.1	-	-	-	-	-	-	-	-	-	-	-	-	-	-	-	-
2232	CATGTACAAAATTAATGGAACGGCTA	FE670762.1	-	-	-	-	-	-	-	-	-	-	-	-	-	-	-	-
2233	CATGTCAGAAAATTGCTCTTGTCCCA	FE670761.1	-	-	-	-	-	-	-	-	-	-	-	-	-	-	-	-
2234	CATGAGCTTCAAAGAAAGGAAGATAA	FE670756.1	-	-	-	-	-	-	-	-	-	-	-	-	-	-	-	-
2235	CATGTCCAGGTGGAGGGTATGCACCT	FE670754.1	-	-	-	-	-	-	-	-	-	-	-	-	-	-	-	-
2236	CATGTTGCTCAATGTTACGAATCCAA	FE670753.1	-	-	-	-	-	-	-	-	-	-	-	-	-	-	-	-
2237	CATGTTTGCTGCTTAGATTGGAAGCT	FE670751.1	-	-	-	-	-	-	-	-	-	-	-	-	-	-	-	-
2238	CATGGCATTTCCCTATGTGGCAGCAT	FE670750.1	-	-	-	-	-	-	-	-	-	-	-	-	-	-	-	-
2240	CATGCATTCCTGCTTCTTGACAAATA	FE670747.1	8e-07	Cicer arietinum mRNA for putative 26S protease regulatory subunit 6, partial	AJ006095	26S protease regulatory subunit 6 (Fragment)	O65750_CICAR	TC114785	1e-07	0	0	AJ006095	0	Cicer arietinum mRNA for putative 26S protease regulatory subunit 6, partial	26S protease regulatory subunit 6 (Fragment)	O65750_CICAR	ID direct correlation	-
2245	CATGCTCGCTCGCGGCAACACAAACC	FE670742.1	-	-	-	-	-	-	-	-	-	-	-	-	-	-	-	-
2246	CATGTTAATGTTCAAGGCAACAAGGC	FE670741.1	-	-	-	-	-	-	-	-	-	-	-	-	-	-	-	-
2248	CATGGATGTTGGAGATCTCTTCTCCA	FE670739.1	-	-	-	-	-	-	-	-	-	-	-	-	-	-	-	-
2249	CATGTTCACCCAATGGTGTGGTCCCT	FE670738.1	-	-	-	-	-	-	-	-	-	-	-	-	-	-	-	-
2250	CATGGAAACACCAAATTCATTTTCAA	FE670737.1	-	-	-	-	-	-	-	-	-	-	-	-	-	-	-	-
2251	CATGTTGGAGAGAGCTACAAGGTCTG	FE670736.1	-	-	-	-	-	-	-	-	-	-	-	-	-	-	-	-
2252	CATGGAAGTTAACAACTTCTCTTTCA	FE670734.1	-	-	-	-	-	-	-	-	-	-	-	-	-	-	-	-
2253	CATGGTCTGCAGTGCAGGAGAGAGCA	FE670733.1	-	-	-	-	-	-	-	-	-	-	-	-	-	-	-	-
2256	CATGATGAAATTGACATTGAATTTCT	FE670729.1	-	-	-	-	-	-	-	-	-	-	-	-	-	-	-	-
2260	CATGGATTCAACCATTCCTCAGGGAC	FE670724.1	-	-	-	-	-	TC128133	1e-07	0	0	X63102	2e-05	P.vulgaris gene for endopeptidase	Vignain precursor; ( EC=3.4.22.-; AltName: Full=Bean endopeptidase; AltName: Full=Cysteine proteinase EP-C1)	CYSEP_PHAVU	-	-
2261	CATGTATCATCATATTCACTACGAAT	FE670722.1	-	-	-	-	-	-	-	-	-	-	-	-	-	-	-	-
2262	CATGACAATGCCTCTGCATAATGTTG	FE670721.1	-	-	-	-	-	-	-	-	-	-	-	-	-	-	-	-
2263	CATGTAGATGCTGCTGTGGCTTTCTA	FE670720.1	-	-	-	-	-	-	-	-	-	-	-	-	-	-	-	-
2264	CATGAGTACGAATAACCAATGTAAAT	FE670716.1	-	-	-	-	-	-	-	-	-	-	-	-	-	-	-	-
2265	CATGGTAATAGGGCGTGAAGGATCTT	FE670715.1	-	-	-	-	-	-	-	-	-	-	-	-	-	-	-	-
2267	CATGAGAGGACTTCGAGGTCAGAATT	FE669665.1	-	-	-	-	-	-	-	-	-	-	-	-	-	-	-	-
2268	CATGATATTGTTGAGTGTCGACCATC	FE669664.1	-	-	-	-	-	-	-	-	-	-	-	-	-	-	-	-
2269	CATGCACGAAAAGGGATTTGTTTCCG	FE669662.1	-	-	-	-	-	-	-	-	-	-	-	-	-	-	-	-
2270	CATGATCAGCACCATAGACATCCACA	FE669661.1	-	-	-	-	-	-	-	-	-	-	-	-	-	-	-	-
2271	CATGAATTTCTCAACCTCTGTCTGTG	FE669660.1	-	-	-	-	-	-	-	-	-	-	-	-	-	-	-	-
2272	CATGTGAAGATGAGTACTTGAGTCCA	FE669658.1	-	-	-	-	-	-	-	-	-	-	-	-	-	-	-	-
2274	CATGGGGCACGTGGAATCCCGTGTGA	FE669656.1	8e-07	Vigna unguiculata partial mRNA for putative ATP synthase CF0 subunit I (atpF gene), clone 61	AM748447	-	A6H5B5_VIGUN	TC125568	1e-07	0	0	X55033	0	P.sativum chloroplast DNA of the single ribosomal RNA operon	-	-	-	Uncorrelated annotation
2278	CATGAAAAAACACTTGATCCACTTGG	FE669651.1	-	-	-	-	-	-	-	-	-	-	-	-	-	-	-	-
2280	CATGCTTAATCTCAGCCAGTTTCAAT	FE669649.1	-	-	-	-	-	-	-	-	-	-	-	-	-	-	-	-
2281	CATGGTTCAGTCTGTGCCTTCTAGAA	FE669648.1	-	-	-	-	-	-	-	-	-	-	-	-	-	-	-	-
2282	CATGGCCAACCGACCATTCTTGATTT	FE669647.1	-	-	-	-	-	-	-	-	-	-	-	-	-	-	-	-
2283	CATGTCCGTTCTTGTAACTGGTTCAG	FE669646.1	-	-	-	-	-	-	-	-	-	-	-	-	-	-	-	-
2286	CATGTATACAAGAAGTTTCTGGAAGA	FE669643.1	-	-	-	-	-	-	-	-	-	-	-	-	-	-	-	-
2290	CATGACACCCCATCCAGCCTTTTTGG	FE669638.1	-	-	-	-	-	-	-	-	-	-	-	-	-	-	-	-
2292	CATGTGGGGCTTGAAAAAACACAACT	FE669635.1	-	-	-	-	-	-	-	-	-	-	-	-	-	-	-	-
2293	CATGTTTGATTTCAGCCAATTGAAGA	FE669634.1	-	-	-	-	-	-	-	-	-	-	-	-	-	-	-	-
2294	CATGAACAATAATTTTGATTTGCCTG	FE669632.1	-	-	-	-	-	-	-	-	-	-	-	-	-	-	-	-
2296	CATGCTCATTCCAGCAGATTACGTCT	FE669627.1	-	-	-	-	-	-	-	-	-	-	-	-	-	-	-	-
2298	CATGCTTTTTTTAATATATAATATGT	FE669625.1	-	-	-	-	-	-	-	-	-	-	-	-	-	-	-	-
2299	CATGTAAGGATGGTCTTCAATCTCAA	FE669624.1	-	-	-	-	-	-	-	-	-	-	-	-	-	-	-	-
2301	CATGGCTTATTCAGAGATTGTAGCAT	FE669619.1	-	-	-	-	-	-	-	-	-	-	-	-	-	-	-	-
2302	CATGTTCTTATCAAAACTGCAAATTT	FE669618.1	-	-	-	-	-	-	-	-	-	-	-	-	-	-	-	-
2304	CATGCAAGCATTTTTTTATTAGCTTT	FE669616.1	-	-	-	-	-	-	-	-	-	-	-	-	-	-	-	-
2306	CATGACACATCTCTCCCCCCACACCC	FE669614.1	-	-	-	-	-	-	-	-	-	-	-	-	-	-	-	-
2308	CATGGCAGGGGCAGATAAACTTGTTC	FE669612.1	8e-07	Cicer arietinum mRNA for plastoquinol-plastocyanin reductase, partial cds	AB025003	Plastoquinol-plastocyanin reductase (Fragment)	Q9SXU4_CICAR	-	-	-	-	-	-	-	-	-	-	-
2309	CATGGAGGTGTAAATTTGGTGTCTGA	FE669611.1	-	-	-	-	-	-	-	-	-	-	-	-	-	-	-	-
2312	CATGCAGGAGCGGGAAATAGACGGAA	FE669605.1	-	-	-	-	-	-	-	-	-	-	-	-	-	-	-	-
2313	CATGATTTGGAAAACATCATTTTTTT	FE669604.1	-	-	-	-	-	-	-	-	-	-	-	-	-	-	-	-
2317	CATGATATTTTTCAGTGTCATCACTT	FE669600.1	-	-	-	-	-	-	-	-	-	-	-	-	-	-	-	-
2318	CATGGTTGTCTGCCTGCATTATTGAA	FE669599.1	-	-	-	-	-	-	-	-	-	-	-	-	-	-	-	-
2319	CATGGCTGTTTACAGAAAGCTTGCCA	FE669598.1	-	-	-	-	-	-	-	-	-	-	-	-	-	-	-	-
2321	CATGTTGTTAAATAAAACTATCGCAA	FE669596.1	-	-	-	-	-	-	-	-	-	-	-	-	-	-	-	-
2322	CATGTGGATAATATACACACAAAATT	FE669595.1	-	-	-	-	-	-	-	-	-	-	-	-	-	-	-	-
2323	CATGTAAGCAACAGAAAAACATAAAA	FE669594.1	-	-	-	-	-	-	-	-	-	-	-	-	-	-	-	-
2324	CATGCCAATCATCCCCTTCTCATTTA	FE669593.1	-	-	-	-	-	-	-	-	-	-	-	-	-	-	-	-
2327	CATGACCATAGTTACAACCACCATTG	FE669590.1	-	-	-	-	-	-	-	-	-	-	-	-	-	-	-	-
2328	CATGGGTTAATAATTACCCATATGGT	FE669589.1	-	-	-	-	-	-	-	-	-	-	-	-	-	-	-	-
2329	CATGAATTACAATTACTCTTCCTCCT	FE669588.1	-	-	-	-	-	-	-	-	-	-	-	-	-	-	-	-
2332	CATGGACCTTTCTTCCTTGGCCAATT	FE669584.1	-	-	-	-	-	-	-	-	-	-	-	-	-	-	-	-
2334	CATGCTCTCTGAGAATGATCCAAAAT	FE669581.1	-	-	-	-	-	-	-	-	-	-	-	-	-	-	-	-
2335	CATGGCTCGTCTAATGGTGCACGCGT	FE669580.1	-	-	-	-	-	-	-	-	-	-	-	-	-	-	-	-
2336	CATGTGGAAAAGAAGGCCTTGTGGGA	FE669579.1	-	-	-	-	-	-	-	-	-	-	-	-	-	-	-	-
2337	CATGTACTTTCACCAGTTGGAGCTGA	FE669578.1	-	-	-	-	-	-	-	-	-	-	-	-	-	-	-	-
2338	CATGGACTTGGTAATTATACCTGCTG	FE669577.1	-	-	-	-	-	-	-	-	-	-	-	-	-	-	-	-
2341	CATGTATGTCCAATGGAAGTATGCTC	FE669957.1	-	-	-	-	-	-	-	-	-	-	-	-	-	-	-	-
2343	CATGGCTGCTTACAAAGTGAAACTCA	FE669954.1	-	-	-	-	-	-	-	-	-	-	-	-	-	-	-	-
2345	CATGCAAGCCAATTCTTACACCACGA	FE669952.1	-	-	-	-	-	-	-	-	-	-	-	-	-	-	-	-
2346	CATGGCATAATTGTTGTTTATGATGT	FE669951.1	8e-07	L.japonicus mRNA for small GTP-binding protein, RAB1C	Z73932	RAB1C	Q40203_LOTJA	-	-	-	-	-	-	-	-	-	-	-
2347	CATGGCAGTAGAACTGATGACAACGG	FE669949.1	-	-	-	-	-	-	-	-	-	-	-	-	-	-	-	-
2348	CATGTCCCCACAGAGATCAATGGCTA	FE669948.1	-	-	-	-	-	-	-	-	-	-	-	-	-	-	-	-
2349	CATGTTTCTTATTACAACCTCTTCAT	FE669944.1	-	-	-	-	-	-	-	-	-	-	-	-	-	-	-	-
2350	CATGGGGACTCGGAATGCCTATCGTA	FE669943.1	-	-	-	-	-	-	-	-	-	-	-	-	-	-	-	-
2351	CATGAGCCTCTTCGGTATTGGAAGAA	FE669942.1	-	-	-	-	-	-	-	-	-	-	-	-	-	-	-	-
2352	CATGATGTCAATATGGAAGAGGAGAC	FE669939.1	-	-	-	-	-	TC113116	5e-07	0	0	AF169022	0	Glycine max seed maturation protein PM37 (PM37) mRNA, complete cds	Seed maturation protein PM37	Q9SWB5_SOYBN	-	-
2353	CATGCGCATCCCTTAAATTAGATGTA	FE669937.1	-	-	-	-	-	-	-	-	-	-	-	-	-	-	-	-
2354	CATGATGACTTGACGTCATCCTCACC	FE669936.1	8e-07	Arachis hypogaea cultivar JL24 16S ribosomal RNA gene, partial sequence; plastid	EU982406	-	-	TC134712	1e-07	0	0	AF372517	0	Medicago sativa 16S ribosomal RNA gene, partial sequence; and tRNA-Ile and tRNA-Ala genes, complete sequence; chloroplast genes for chloroplast products	-	-	-	Correlated RNA description
2359	CATGGCCACCACAAACCCTTTATCCC	FE669931.1	-	-	-	-	-	-	-	-	-	-	-	-	-	-	-	-
2362	CATGGCTTGATATCAAATTCAACCTA	FE669928.1	-	-	-	-	-	-	-	-	-	-	-	-	-	-	-	-
2363	CATGTGAGGAGCAGCAGCAAGTGTTG	FE669926.1	-	-	-	-	-	-	-	-	-	-	-	-	-	-	-	-
2364	CATGTTACCATATTCCAAAAGTTTCT	FE669925.1	-	-	-	-	-	-	-	-	-	-	-	-	-	-	-	-
2365	CATGACGGCACCCTCACGCGCTTACA	FE669924.1	-	-	-	-	-	-	-	-	-	-	-	-	-	-	-	-
2369	CATGATGACATTTCCTCATCTTTCAC	FE669918.1	-	-	-	-	-	-	-	-	-	-	-	-	-	-	-	-
2370	CATGAAGAAACATAATGCTGGAACAA	FE669914.1	-	-	-	-	-	-	-	-	-	-	-	-	-	-	-	-
2371	CATGTAATATATCCTCTGAAAACTTA	FE669913.1	-	-	-	-	-	-	-	-	-	-	-	-	-	-	-	-
2372	CATGGCTAAATCTTCTGAAGACACCG	FE669912.1	-	-	-	-	-	-	-	-	-	-	-	-	-	-	-	-
2373	CATGATGCGGCTCTGGATCCTTCAGC	FE669911.1	-	-	-	-	-	-	-	-	-	-	-	-	-	-	-	-
2374	CATGTTAGGAACTTCCTTGAGCCCTG	FE669910.1	-	-	-	-	-	-	-	-	-	-	-	-	-	-	-	-
2375	CATGGAAGCAGAAGAGACTGAACTCA	FE669909.1	-	-	-	-	-	-	-	-	-	-	-	-	-	-	-	-
2376	CATGGTAGTGGAGGAAGGCCTAACCG	FE669907.1	-	-	-	-	-	TC132046	1e-07	0	0	DQ028774	5e-97	Glycine max NAC domain protein NAC6 (NAC6) mRNA, complete cds	NAC6 protein (NAC domain protein NAC6)	Q52QR0_SOYBN	-	-
2378	CATGACGACTCAAATGAGCAAGAAGA	FE669904.1	-	-	-	-	-	-	-	-	-	-	-	-	-	-	-	-
2379	CATGGCTATCTTGTTCTTCATTTTCT	FE669903.1	-	-	-	-	-	-	-	-	-	-	-	-	-	-	-	-
2383	CATGCTGCTTCTTAACATTTGGCACT	FE669898.1	-	-	-	-	-	-	-	-	-	-	-	-	-	-	-	-
2384	CATGCTATCTTTTGGAAGGAAAAGTG	FE669897.1	-	-	-	-	-	-	-	-	-	-	-	-	-	-	-	-
2385	CATGTCATTTCTTACAAGGCTGCATT	FE669896.1	-	-	-	-	-	-	-	-	-	-	-	-	-	-	-	-
2389	CATGCAGAACCTGATAGAAAGATTGG	FE669892.1	-	-	-	-	-	-	-	-	-	-	-	-	-	-	-	-
2390	CATGCAGAGCTGGTACTTGCTCTTCT	FE669888.1	-	-	-	-	-	-	-	-	-	-	-	-	-	-	-	-
2392	CATGTCAATATCTACCTCCTTAACTA	FE669886.1	-	-	-	-	-	-	-	-	-	-	-	-	-	-	-	-
2395	CATGATCAGTCTGATTGCGGTTCACA	FE669882.1	-	-	-	-	-	-	-	-	-	-	-	-	-	-	-	-
2396	CATGTGCTCAAAGTTCCATTTCGACG	FE669881.1	-	-	-	-	-	-	-	-	-	-	-	-	-	-	-	-
2397	CATGCTTCGCATAATTCCTCCGATGG	FE669880.1	-	-	-	-	-	-	-	-	-	-	-	-	-	-	-	-
2398	CATGCTTAGACAAACTAAGGTGTTTC	FE669877.1	-	-	-	-	-	-	-	-	-	-	-	-	-	-	-	-
2399	CATGGTGACTCCTCTGTTGCAGCCAG	FE669876.1	-	-	-	-	-	-	-	-	-	-	-	-	-	-	-	-
2400	CATGTCCCTCCTATATCTTCCACCGT	FE669875.1	-	-	-	-	-	-	-	-	-	-	-	-	-	-	-	-
2402	CATGCCGGATTTGCAAAATCTACAAA	FE669872.1	-	-	-	-	-	-	-	-	-	-	-	-	-	-	-	-
2403	CATGACAGGGAAGGACGGGTTCGTAT	FE669870.1	-	-	-	-	-	-	-	-	-	-	-	-	-	-	-	-
2404	CATGTTGAAGAAACAGCACCACCTCC	FE669869.1	-	-	-	-	-	-	-	-	-	-	-	-	-	-	-	-
2407	CATGCTCAGGATATAAAATGAAAGAG	FE669865.1	-	-	-	-	-	-	-	-	-	-	-	-	-	-	-	-
2408	CATGCATTAGGCAATGTGACCAGCAA	FE669864.1	-	-	-	-	-	-	-	-	-	-	-	-	-	-	-	-
2409	CATGGTTGTCCGCAAACCAGCTCACC	FE669863.1	-	-	-	-	-	-	-	-	-	-	-	-	-	-	-	-
2411	CATGGCCCTAACTACAGCATTAACAA	FE671003.1	-	-	-	-	-	-	-	-	-	-	-	-	-	-	-	-
2413	CATGTTTGCTCTTGCTATACCTTATG	FE670709.1	-	-	-	-	-	-	-	-	-	-	-	-	-	-	-	-
2416	CATGCAGGAGGTGTGCTTCCTGGGAA	FE670705.1	-	-	-	-	-	-	-	-	-	-	-	-	-	-	-	-
2417	CATGGACTACTTTGCCAAATGCACTA	FE670329.1	8e-07	Cicer arietinum partial mRNA for putative Bet v I family protein (bet gene)	AJ746345	Putative Bet v I family protein (Fragment)	Q6KAV9_CICAR	-	-	-	-	-	-	-	-	-	-	-
2419	CATGCAAAATATCCCTTCACCCTCAC	FE670327.1	-	-	-	-	-	-	-	-	-	-	-	-	-	-	-	-
2420	CATGCTTCAATTGCTTAGTACAAGCA	FE670325.1	-	-	-	-	-	-	-	-	-	-	-	-	-	-	-	-
2422	CATGAAGCCCATAGCATTGGCATATC	FE670323.1	-	-	-	-	-	-	-	-	-	-	-	-	-	-	-	-
2424	CATGTCCCTCACGGCGAAACGACCAA	FE670321.1	8e-07	Cicer arietinum mRNA for elongation factor 1-alpha (clone CanEF1-a2), partial	AJ010225	Elongation factor 1-alpha (Fragment)	Q9SB99_CICAR	-	-	-	-	-	-	-	-	-	-	-
2427	CATGATCCTCATCCTCTGTTTCACTC	FE670700.1	-	-	-	-	-	-	-	-	-	-	-	-	-	-	-	-
2428	CATGGATGGATTTTACATTGCTCCTG	FE670699.1	-	-	-	-	-	TC128508	5e-07	0	0	AY130300	2e-90	Medicago sativa rubisco activase (Rca) mRNA, partial cds	Rubisco activase (Fragment)	Q8GTY4_MEDSA	-	-
2429	CATGGCAGGAAGAGGCAAAACCCTAG	FE670698.1	-	-	-	-	-	-	-	-	-	-	-	-	-	-	-	-
2430	CATGTGTATACTCTCTCCTCCTCAGT	FE670697.1	-	-	-	-	-	-	-	-	-	-	-	-	-	-	-	-
2432	CATGGAACCGCAGACGGAGAAAGAGA	FE670695.1	-	-	-	-	-	-	-	-	-	-	-	-	-	-	-	-
2433	CATGCTCTTGTTAGCTGCTGAGTAAG	FE670694.1	-	-	-	-	-	-	-	-	-	-	-	-	-	-	-	-
2434	CATGGCATCAGCAGCTACAGGGTTTG	FE670693.1	-	-	-	-	-	-	-	-	-	-	-	-	-	-	-	-
2436	CATGTATGATTCAATTTCTCTAACCA	FE670690.1	-	-	-	-	-	-	-	-	-	-	-	-	-	-	-	-
2437	CATGCACTTTTCCCACAAATCTTCTT	FE670316.1	-	-	-	-	-	-	-	-	-	-	-	-	-	-	-	-
2438	CATGCTATGCGTTTTCCCTTTGTTGG	FE670315.1	-	-	-	-	-	TC123621	1e-07	0	0	AY445891	3e-103	Galega orientalis signal peptide peptidase mRNA, partial cds	Signal peptide peptidase (Fragment)	Q6SXP6_9FABA	-	-
2440	CATGTCTATGGTTGAAGGCCCTAAAC	FE670313.1	-	-	-	-	-	-	-	-	-	-	-	-	-	-	-	-
2441	CATGTATCTGTTTCCTTAGCTATATC	FE670312.1	-	-	-	-	-	-	-	-	-	-	-	-	-	-	-	-
2442	CATGTTACTGCTTCAAAGAATCAAAG	FE670311.1	-	-	-	-	-	-	-	-	-	-	-	-	-	-	-	-
2444	CATGGACGGCCCAGATACGTTTGGAA	FE670308.1	8e-07	Cicer arietinum partial mRNA for pectin methylesterase (pme2 gene)	AJ609277	Pectinesterase (Fragment); ( EC=3	Q708X3_CICAR	-	-	-	-	-	-	-	-	-	-	-
2446	CATGCTGGGTTTTTAAATAAGGGTTT	FE670306.1	-	-	-	-	-	-	-	-	-	-	-	-	-	-	-	-
2448	CATGTCTTTAATCGGAGTTTTTCACC	FE670688.1	-	-	-	-	-	-	-	-	-	-	-	-	-	-	-	-
2451	CATGGATAGTGGAAATCGCATTTCCT	FE670682.1	-	-	-	-	-	-	-	-	-	-	-	-	-	-	-	-
2452	CATGCCGGTTCAGAAACAAACCCGAG	FE670680.1	-	-	-	-	-	-	-	-	-	-	-	-	-	-	-	-
2455	CATGATTCAAGGTCACAAGTTATATA	FE670304.1	-	-	-	-	-	-	-	-	-	-	-	-	-	-	-	-
2456	CATGTTTTAACCATTTGAATTAAAAC	FE670303.1	-	-	-	-	-	-	-	-	-	-	-	-	-	-	-	-
2457	CATGATTTGAAGAATTATATGGCTTG	FE670302.1	-	-	-	-	-	TC126146	7e-06	0	0	AF145386	2e-11	Phaseolus vulgaris hypersensitive reaction associated Ca2+-binding protein (HRA32) mRNA, complete cds	Hypersensitive reaction associated Ca2+-binding protein	Q9SWP6_PHAVU	-	-
2460	CATGGAAGAGAGAGGGTGTCTGCCAT	FE670298.1	-	-	-	-	-	-	-	-	-	-	-	-	-	-	-	-
2461	CATGAAGCTAAGTGTTTCAATTTTGG	FE670297.1	-	-	-	-	-	-	-	-	-	-	-	-	-	-	-	-
2463	CATGTCTGAAGAAGACCTTCTTAATG	FE670295.1	-	-	-	-	-	-	-	-	-	-	-	-	-	-	-	-
2464	CATGCATTGCTATAATAAGTTATTGT	FE670294.1	-	-	-	-	-	-	-	-	-	-	-	-	-	-	-	-
2466	CATGTGTACCCATATCCACCACAAAT	FE670676.1	-	-	-	-	-	-	-	-	-	-	-	-	-	-	-	-
2467	CATGAATGGATTATCGAGATTCCCAC	FE670675.1	-	-	-	-	-	-	-	-	-	-	-	-	-	-	-	-
2468	CATGTCCCCTCTCTATCCCCTCCAAA	FE670674.1	-	-	-	-	-	-	-	-	-	-	-	-	-	-	-	-
2469	CATGGTTCAATCACCAAATTGTCAAA	FE670673.1	-	-	-	-	-	-	-	-	-	-	-	-	-	-	-	-
2470	CATGGACTCAACCTTAAACTGTAGAC	FE670672.1	-	-	-	-	-	-	-	-	-	-	-	-	-	-	-	-
2471	CATGGTGGAGAAGGTTANCTGTGTGA	FE670671.1	-	-	-	-	-	-	-	-	-	-	-	-	-	-	-	-
2475	CATGCGTTCGCTTTAACAGAAAACTT	FE670293.1	-	-	-	-	-	-	-	-	-	-	-	-	-	-	-	-
2477	CATGTCAAAAATCACTAGCATTCCCA	FE670291.1	-	-	-	-	-	-	-	-	-	-	-	-	-	-	-	-
2478	CATGGTTTCCTGATGAGGATACATAT	FE670290.1	-	-	-	-	-	-	-	-	-	-	-	-	-	-	-	-
2483	CATGGATAGATCACCCAGGTGCGGGT	FE670284.1	-	-	-	-	-	-	-	-	-	-	-	-	-	-	-	-
2484	CATGGCTTAGGCCATTGTTTTATGTA	FE670283.1	-	-	-	-	-	-	-	-	-	-	-	-	-	-	-	-
2486	CATGCTCCTTCTTAAAGTAACCAGAA	FE670665.1	-	-	-	-	-	-	-	-	-	-	-	-	-	-	-	-
2490	CATGTGGAAAGTTGGAGACGAGAAAT	FE670661.1	8e-07	Cicer arietinum WRKY family transcription factor (WRKY1) mRNA, complete cds	EU049488	-	-	-	-	-	-	-	-	-	-	-	-	-
2491	CATGGGCGGGTTCTTCATCCCAAATT	FE670659.1	-	-	-	-	-	-	-	-	-	-	-	-	-	-	-	-
2492	CATGTTTTTCACCTTTGTGTTCCTCT	FE670658.1	-	-	-	-	-	-	-	-	-	-	-	-	-	-	-	-
2493	CATGCCGTAGAGCCAGCAAAATCAGC	FE670657.1	-	-	-	-	-	-	-	-	-	-	-	-	-	-	-	-
2494	CATGGCGAAAATAGCTGCTTCTTCGG	FE670655.1	-	-	-	-	-	-	-	-	-	-	-	-	-	-	-	-
2495	CATGATTGAGACTCCTTTATGTCAAC	FE670654.1	-	-	-	-	-	-	-	-	-	-	-	-	-	-	-	-
2497	CATGTCAAAAAATTGCTCTTGTCCCA	FE670280.1	-	-	-	-	-	-	-	-	-	-	-	-	-	-	-	-
2499	CATGCAAGCACATATATAAGTTAATT	FE670278.1	-	-	-	-	-	-	-	-	-	-	-	-	-	-	-	-
2500	CATGGCAATCATTGCATCGGGAGTTG	FE670275.1	-	-	-	-	-	-	-	-	-	-	-	-	-	-	-	-
2501	CATGTCGGACGCGTTTTGCAGCGATT	FE670274.1	-	-	-	-	-	-	-	-	-	-	-	-	-	-	-	-
2503	CATGCCTGGGCATAGCTTTAATGTGG	FE670272.1	-	-	-	-	-	-	-	-	-	-	-	-	-	-	-	-
2504	CATGCAGCTGAAACACCTTTCCTTTG	FE670271.1	-	-	-	-	-	-	-	-	-	-	-	-	-	-	-	-
2505	CATGAACTTCAGATTTCGACTTGTCA	FE670270.1	-	-	-	-	-	-	-	-	-	-	-	-	-	-	-	-
2507	CATGAAAGAAACAAACTTGAATTCTT	FE670650.1	-	-	-	-	-	-	-	-	-	-	-	-	-	-	-	-
2508	CATGCGACGTTTTTAGCTCCACAACC	FE670649.1	-	-	-	-	-	-	-	-	-	-	-	-	-	-	-	-
2509	CATGCAACAGTTCGTTTTTTCCTTCT	FE670648.1	-	-	-	-	-	-	-	-	-	-	-	-	-	-	-	-
2510	CATGTCTTGATATCGACTCCATTTCA	FE670647.1	-	-	-	-	-	-	-	-	-	-	-	-	-	-	-	-
2512	CATGTAACACTTCGGCATTCCCTACC	FE670644.1	-	-	-	-	-	-	-	-	-	-	-	-	-	-	-	-
2515	CATGAGACTTCAAGAGCAAGGAAAAA	FE670266.1	-	-	-	-	-	-	-	-	-	-	-	-	-	-	-	-
2516	CATGGGATTTGTGGAAGGCTAAAGGG	FE670265.1	-	-	-	-	-	-	-	-	-	-	-	-	-	-	-	-
2519	CATGCCGTGTCTGAAGGAACTAAGGC	FE670261.1	8e-07	Cicer arietinum mRNA for histone H2B	AJ400863	Histone H2B	Q9M3H6_CICAR	-	-	-	-	-	-	-	-	-	-	-
2520	CATGTAATATTTGCCAAAATACTCAG	FE670260.1	-	-	-	-	-	-	-	-	-	-	-	-	-	-	-	-
2521	CATGGATTAGATGAAAAGACAAGTGC	FE670259.1	8e-07	Lupinus albus mRNA for ATP citrate lyase b-subunit (aclb gene)	AJ344108	ATP citrate lyase b-subunit; ( EC=4	Q93YH3_LUPAL	TC117769	1e-07	0	0	AJ344108	0	Lupinus albus mRNA for ATP citrate lyase b-subunit (aclb gene)	ATP citrate lyase b-subunit; ( EC=4.1.3.8)	Q93YH3_LUPAL	ID direct correlation	-
2524	CATGCGCTCTAAACCGGAAAAACTTC	FE670639.1	-	-	-	-	-	-	-	-	-	-	-	-	-	-	-	-
2525	CATGATATTCTCAAACGCTGTGAAAT	FE670636.1	-	-	-	-	-	-	-	-	-	-	-	-	-	-	-	-
2526	CATGGTATGGTGTAGACAGTGTGTAA	FE670633.1	-	-	-	-	-	-	-	-	-	-	-	-	-	-	-	-
2527	CATGCAGCACCTGTATGAAAGTCTGT	FE670631.1	5e-05	Arachis hypogaea cultivar JL24 16S ribosomal RNA gene, partial sequence; mitochondrial	EU982414	-	-	TC120792	7e-06	0	0	M16859	0	Soybean 18S ribosomal RNA gene	-	-	-	Uncorrelated annotation
2528	CATGGATCGTGAGTCCTTCATTTTTT	FE670630.1	-	-	-	-	-	-	-	-	-	-	-	-	-	-	-	-
2529	CATGTCTTACTGTGATCACAACCAAA	FE670257.1	-	-	-	-	-	-	-	-	-	-	-	-	-	-	-	-
2530	CATGATGATTCATTTCCTATTAGTAT	FE670256.1	8e-07	-	-	-	-	-	-	-	-	-	-	-	-	-	-	-
2531	CATGCGGCCAAACGAACTTCCACATT	FE670255.1	-	-	-	-	-	-	-	-	-	-	-	-	-	-	-	-
2533	CATGCAGACAACCCATCATCCAATGC	FE670253.1	-	-	-	-	-	-	-	-	-	-	-	-	-	-	-	-
2535	CATGTGGGGCCTACTCCGCTCCCACA	FE670251.1	-	-	-	-	-	-	-	-	-	-	-	-	-	-	-	-
2536	CATGTTCCCTCCACCTCTGATGTAGG	FE670249.1	-	-	-	-	-	-	-	-	-	-	-	-	-	-	-	-
2537	CATGACCAATAAACACAACATTTAAG	FE670248.1	-	-	-	-	-	-	-	-	-	-	-	-	-	-	-	-
2538	CATGACAATGGGGGTAAGGAATTGAA	FE670247.1	-	-	-	-	-	-	-	-	-	-	-	-	-	-	-	-
2541	CATGAAGTCTATCATTCCTTGGGCCC	FE670628.1	-	-	-	-	-	TC125759	1e-07	0	0	AF169830	3e-66	Glycine max auxin-induced protein ali50 mRNA, partial cds	Auxin-induced protein ali50 (Fragment)	Q9SWA5_SOYBN	-	-
2542	CATGACCATAGTCAACGATGAGTCAA	FE670626.1	8e-07	Cicer arietinum clone CaHa4 glyceraldehyde 3-phosphate dehydrogenase mRNA, partial cds	EF375948	Glyceraldehyde 3-phosphate dehydrogenase (Fragment)	B0L628_CICAR	-	-	-	-	-	-	-	-	-	-	-
2544	CATGTGTGTTGTATGAGTGTACCACT	FE670621.1	-	-	-	-	-	-	-	-	-	-	-	-	-	-	-	-
2545	CATGTCTAATGAGTAATCATAGTCTT	FE670620.1	-	-	-	-	-	-	-	-	-	-	-	-	-	-	-	-
2546	CATGTCCCATTTTAGGCCTCTTTGTT	FE670618.1	-	-	-	-	-	TC130239	1e-07	0	0	AY687390	1e-09	Glycine max putative receptor-like protein kinase 3 mRNA, complete cds	Putative receptor-like protein kinase 3	Q49N13_SOYBN	-	-
2547	CATGGCTTCAGCAAATTTTGTCTTGA	FE670243.1	-	-	-	-	-	-	-	-	-	-	-	-	-	-	-	-
2551	CATGTCAGTCACCTCTCTAACAAGAT	FE670235.1	-	-	-	-	-	-	-	-	-	-	-	-	-	-	-	-
2552	CATGGTATCACCAGGTAATTCACAAA	FE669572.1	-	-	-	-	-	-	-	-	-	-	-	-	-	-	-	-
2553	CATGGCAAACCCAGGATCAAACCCAG	FE669571.1	-	-	-	-	-	-	-	-	-	-	-	-	-	-	-	-
2554	CATGTTTGGACTTTTAGCCCATTGCT	FE669567.1	-	-	-	-	-	-	-	-	-	-	-	-	-	-	-	-
2555	CATGTGTTGTTCAAAACCCAGATCTT	FE669566.1	-	-	-	-	-	-	-	-	-	-	-	-	-	-	-	-
2556	CATGCCCCTAAGGGCACTGTCATAAT	FE669565.1	-	-	-	-	-	-	-	-	-	-	-	-	-	-	-	-
2557	CATGTTGCGGCGGAGGATATGCCGGG	FE669564.1	-	-	-	-	-	-	-	-	-	-	-	-	-	-	-	-
2560	CATGCAGGCCGACAAGCAGAATTGCT	FE669561.1	-	-	-	-	-	-	-	-	-	-	-	-	-	-	-	-
2561	CATGATGATAATATCATCATCTTCAT	FE669560.1	-	-	-	-	-	-	-	-	-	-	-	-	-	-	-	-
2564	CATGTCTGAAAAAGACCTTCTTAATG	FE669557.1	-	-	-	-	-	-	-	-	-	-	-	-	-	-	-	-
2565	CATGAAATGATGCACTTACGTGACCT	FE669556.1	8e-07	Sesbania rostrata cDNA-AFLP fragment 018BT22M41-318.5 mRNA sequence	EF415825	-	-	-	-	-	-	-	-	-	-	-	-	-
2569	CATGGTAGTATCTCCCTGTAGGAACA	FE669551.1	-	-	-	-	-	-	-	-	-	-	-	-	-	-	-	-
2570	CATGCCACCCATTCCACCAGGCATAG	FE669550.1	-	-	-	-	-	-	-	-	-	-	-	-	-	-	-	-
2571	CATGATTATTTTTTGGAATCATTCAG	FE669549.1	-	-	-	-	-	-	-	-	-	-	-	-	-	-	-	-
2573	CATGGACCCGGTGAAATTGAATTCTC	FE669547.1	-	-	-	-	-	TC133896	1e-07	0	0	DQ219393	0	Leucaena leucocephala clone A516 mitochondrial sequence	-	-	-	-
2574	CATGAATTTGTTGAAAATGTTCCGGA	FE669546.1	-	-	-	-	-	-	-	-	-	-	-	-	-	-	-	-
2575	CATGATTGCTGTCGTCTATATGAGGT	FE669544.1	-	-	-	-	-	-	-	-	-	-	-	-	-	-	-	-
2576	CATGTGAGTGGTTGTNGGGAAGTAAA	FE669542.1	-	-	-	-	-	-	-	-	-	-	-	-	-	-	-	-
2579	CATGCTAGATGGGCAATGCTTGGTGC	FE669537.1	-	-	-	-	-	-	-	-	-	-	-	-	-	-	-	-
2581	CATGGCTGTGACCTGGGAGGAAAAGA	FE669535.1	-	-	-	-	-	-	-	-	-	-	-	-	-	-	-	-
2583	CATGTACCAATGGTTGGTAGGAGAAT	FE669531.1	-	-	-	-	-	-	-	-	-	-	-	-	-	-	-	-
2584	CATGCAAATCAATTTCATAAATTGTA	FE669527.1	-	-	-	-	-	-	-	-	-	-	-	-	-	-	-	-
2585	CATGCTAATGTATCCAGAGCGTAGGC	FE669526.1	8e-07	Glycyrrhiza uralensis 18S ribosomal RNA, partial sequence	EF571296	-	-	AW686718	1e-07	0	0	AJ577394	0	Cicer arietinum 18S rRNA gene, 5.8S rRNA gene, IGS, ITS1 and ITS2, clone CanrDNA	-	-	-	Correlated RNA description
2586	CATGTGATATAACGAGGGGGAAATTG	FE670617.1	-	-	-	-	-	-	-	-	-	-	-	-	-	-	-	-
2587	CATGGGTATGTTGTGCCAGGGGAGAG	FE670616.1	-	-	-	-	-	-	-	-	-	-	-	-	-	-	-	-
2589	CATGAATCAGATTTGGGTTGCGCAAA	FE670614.1	-	-	-	-	-	-	-	-	-	-	-	-	-	-	-	-
2591	CATGGTAATCTGGTACAATATCAAAG	FE670612.1	-	-	-	-	-	-	-	-	-	-	-	-	-	-	-	-
2592	CATGTTACAAATTTCCCAGAATAATA	FE670611.1	-	-	-	-	-	-	-	-	-	-	-	-	-	-	-	-
2594	CATGTGACCCAGCTTTTGCAGCACAA	FE670608.1	-	-	-	-	-	-	-	-	-	-	-	-	-	-	-	-
2595	CATGTCGCAGTGTATTGCGCCCCCAT	FE670607.1	-	-	-	-	-	-	-	-	-	-	-	-	-	-	-	-
2597	CATGACTCGTAATATCCACTGAACTA	FE669861.1	-	-	-	-	-	-	-	-	-	-	-	-	-	-	-	-
2598	CATGGATGAAGCGGCCATATTTGCAA	FE669857.1	8e-07	Cicer arietinum mRNA for chlorophyll a/b binding protein	AJ131044	Chlorophyll a/b binding protein precursor	Q9ZP08_CICAR	-	-	-	-	-	-	-	-	-	-	-
2599	CATGAGCTTTTGAAATATAAAGGTCC	FE669856.1	-	-	-	-	-	-	-	-	-	-	-	-	-	-	-	-
2600	CATGAGTGTTGTTTTTCGGCCTAGGA	FE669854.1	-	-	-	-	-	-	-	-	-	-	-	-	-	-	-	-
2602	CATGTTTTATTTTAACCTAGGATTTT	FE669852.1	-	-	-	-	-	-	-	-	-	-	-	-	-	-	-	-
2606	CATGTAGGATTTATGTTTATCTTAGA	FE670604.1	-	-	-	-	-	-	-	-	-	-	-	-	-	-	-	-
2607	CATGGACAAGGTTGGACGATAAAGTA	FE670602.1	-	-	-	-	-	-	-	-	-	-	-	-	-	-	-	-
2608	CATGAGCCCACACATTAAATATGCAA	FE670601.1	-	-	-	-	-	-	-	-	-	-	-	-	-	-	-	-
2610	CATGGATCCCACCAAGAAGCGCAAGC	FE670599.1	-	-	-	-	-	-	-	-	-	-	-	-	-	-	-	-
2611	CATGAAACTTTGCCTTAGCCAACAGC	FE670594.1	-	-	-	-	-	-	-	-	-	-	-	-	-	-	-	-
2612	CATGGTTTCCCAGTGAAGAGGACCAC	FE669849.1	-	-	-	-	-	-	-	-	-	-	-	-	-	-	-	-
2613	CATGATAGAATTAGACGCAGAATCTC	FE669848.1	-	-	-	-	-	-	-	-	-	-	-	-	-	-	-	-
2614	CATGAGATGGATATTATTATTGTTGT	FE669847.1	8e-07	Cicer arietinum mRNA for for hypothetical protein, clone Can47	AJ404640	Putative uncharacterized protein	Q9LEN4_CICAR	-	-	-	-	-	-	-	-	-	-	-
2617	CATGCTTGATATGCTGCTTCTTTGTT	FE669842.1	-	-	-	-	-	-	-	-	-	-	-	-	-	-	-	-
2619	CATGCATATAGATAGCTACAATAACT	FE669840.1	-	-	-	-	-	-	-	-	-	-	-	-	-	-	-	-
2620	CATGACGCTCTCCCGCAGAAAGAAAA	FE669839.1	-	-	-	-	-	-	-	-	-	-	-	-	-	-	-	-
2621	CATGATGAAGAGATCTATTAGAATGC	FE669838.1	-	-	-	-	-	-	-	-	-	-	-	-	-	-	-	-
2626	CATGAAGAAGATGAGTACGATGAGGA	FE670587.1	-	-	-	-	-	-	-	-	-	-	-	-	-	-	-	-
2627	CATGGAGGTAAGGCGGTTGCAAAGTT	FE670586.1	-	-	-	-	-	-	-	-	-	-	-	-	-	-	-	-
2628	CATGAAATTGAATTTNATGGGGTAAA	FE670585.1	-	-	-	-	-	-	-	-	-	-	-	-	-	-	-	-
2629	CATGCAAAGCAGTGAGTATGAAGTTA	FE670584.1	8e-07	Cicer arietinum mRNA for putative universal stress protein (Usp gene)	AJ630657	Putative universal stress protein	Q700A7_CICAR	-	-	-	-	-	-	-	-	-	-	-
2632	CATGTTTGATTTCAGCCAATTGAAAA	FE669836.1	-	-	-	-	-	-	-	-	-	-	-	-	-	-	-	-
2633	CATGGTGGGCTTATCCCGGTTCGCTC	FE669835.1	8e-07	Cicer arietinum 18S ribosomal RNA gene, partial sequence; internal transcribed spacer 1, 5.8S ribosomal RNA gene, and internal transcribed spacer 2, complete sequence; and 26S ribosomal RNA gene, partial sequence	AY594660	-	-	BE204873	1e-07	0	0	X17535	0	V.faba 5.8S, 18S and 25S ribosomal RNA genes and ITS regions	-	-	-	Correlated RNA description
2634	CATGGCTCAACAAAGCAGCCACACCG	FE669833.1	-	-	-	-	-	-	-	-	-	-	-	-	-	-	-	-
[truncated: 1,547 more rows]
